# Supplementary material for: Single-cell transcriptomic profiling of the zebrafish inner ear reveals molecularly distinct hair cell and supporting cell subtypes
Source: eLife. 2023 Jan 4;12:e82978. doi: 10.7554/eLife.82978 (PMC9851615; doi:10.7554/eLife.82978)
Supplement: Supplementary file 1. [file elife-82978-supp1.csv]

gene_short_name	id	p_value	morans_test_statistic	morans_I	num_cells_expressed	q_value
slc35a5	ENSDARG00000000001	0.238087383	0.71246841	0.001425589	58	0.508040096
ccdc80	ENSDARG00000000002	0.011048831	2.288684984	0.004686875	43	0.036596691
nrf1	ENSDARG00000000018	6.17E-11	6.434977966	0.013502154	454	4.09E-10
ube2h	ENSDARG00000000019	9.77E-12	6.709487836	0.014095089	1043	6.67E-11
slc9a3r1a	ENSDARG00000000068	4.14E-41	13.37673065	0.028157655	867	4.89E-40
dap	ENSDARG00000000069	0.045788259	1.687139568	0.003496971	588	0.128459162
itsn1	ENSDARG00000000086	2.29E-05	4.075924692	0.008539867	1360	0.000109553
myh10	ENSDARG00000000103	1.08E-67	17.3447088	0.036544587	2018	1.61E-66
tmem267	ENSDARG00000000142	0.236018977	0.719167123	0.001404708	21	0.50441629
thraa	ENSDARG00000000151	3.83E-06	4.474311194	0.009376316	741	1.96E-05
itsn2a	ENSDARG00000000161	0	39.15374041	0.082558283	1339	0
hoxb2a	ENSDARG00000000175	2.32E-14	7.54155519	0.015745034	94	1.71E-13
ptpn4b	ENSDARG00000000183	1.54E-06	4.665174906	0.009769415	372	8.13E-06
sema6e	ENSDARG00000000189	3.78E-39	13.03669312	0.027457279	3597	4.39E-38
krt97	ENSDARG00000000212	0.580488662	-0.203143752	-0.000485313	201	0.742122183
usp49	ENSDARG00000000229	0.016131879	2.141127501	0.004429866	119	0.051281351
slc40a1	ENSDARG00000000241	0.286452084	0.563779553	0.001116953	69	0.584691948
dcaf8	ENSDARG00000000324	0.63434931	-0.34339492	-0.000778352	73	0.742122183
cfap300	ENSDARG00000000349	0.590943504	-0.229972689	-0.000513261	9	0.742122183
prkag3b	ENSDARG00000000369	0.083787987	1.380034659	0.002766022	21	0.216187201
triob	ENSDARG00000000370	0	41.41697436	0.087316966	1063	0
pde6a	ENSDARG00000000380	0.756290141	-0.694418622	-0.00151403	83	0.799129298
matr3l1.1	ENSDARG00000000394	3.38E-10	6.171832236	0.012950611	534	2.17E-09
si:ch73-314g15.3	ENSDARG00000000423	0.329466131	0.441387814	0.000853131	37	0.647380821
slc39a13	ENSDARG00000000442	0.067877734	1.49178519	0.003076522	190	0.180329395
nitr2b	ENSDARG00000000460	0.113566089	1.207779268	-4.36E-05	1	0.279059806
cntn2	ENSDARG00000000472	7.25E-05	3.799507717	0.00791447	120	0.000329928
tnni1a	ENSDARG00000000474	0.302361822	0.517619686	-5.33E-05	1	0.604443506
pms1	ENSDARG00000000476	9.00E-09	5.630287012	0.011800448	369	5.41E-08
upf3b	ENSDARG00000000489	0.721747564	-0.588040852	-0.001291925	93	0.779945239
stx1b	ENSDARG00000000503	3.45E-48	14.53850263	0.030551772	267	4.41E-47
ankar	ENSDARG00000000516	0.300308687	0.523512904	0.001029887	53	0.604443506
ofd1	ENSDARG00000000529	0.069397216	1.480295396	0.003052217	192	0.184007446
asdurf	ENSDARG00000000540	0.10297659	1.264771695	0.002563336	44	0.258134367
gtf2e1	ENSDARG00000000542	0.454017668	0.115517014	0.000182671	267	0.742122183
slc1a4	ENSDARG00000000551	0.067045605	1.498161828	0.003069713	75	0.17846662
ttn.1	ENSDARG00000000563	0	51.29404896	0.10821688	6031	0
znf281a	ENSDARG00000000567	2.27E-05	4.077625636	0.008523519	269	0.000108775
ell	ENSDARG00000000568	3.91E-17	8.334058367	0.01752835	2064	3.10E-16
grasp	ENSDARG00000000588	0.001955994	2.88517282	0.006020127	439	0.007402017
dnah6	ENSDARG00000000606	0	53.01053214	0.111770985	918	0
ptpn4a	ENSDARG00000000631	0.001330851	3.004325616	0.006278817	1320	0.005180373
opn1mw4	ENSDARG00000000638	NA	NA	NA	0	1
osgepl1	ENSDARG00000000651	0.547412389	-0.119126391	-0.00027093	4	0.742122183
psmb9a	ENSDARG00000000656	NA	NA	NA	0	1
creg2	ENSDARG00000000666	7.92E-05	3.777586503	0.007743441	30	0.000358467
sypl2b	ENSDARG00000000690	0.111420579	1.219007997	0.002483952	63	0.275588713
daxx	ENSDARG00000000729	0.069707336	1.477974243	0.003042629	139	0.18464065
slc6a22.1	ENSDARG00000000730	0.774121095	-0.752487724	-0.001636035	91	0.812235823
lcmt2	ENSDARG00000000747	0.201934868	0.834730019	0.001669645	43	0.444524537
znf511	ENSDARG00000000760	0.523411471	-0.058717578	-0.000156748	4	0.742122183
spi1b	ENSDARG00000000767	0.732588692	-0.62066112	-0.00133398	26	0.787075306
scfd1	ENSDARG00000000779	0.318383476	0.472223942	0.00093299	207	0.630050822
nr4a1	ENSDARG00000000796	8.18E-74	18.1367175	0.038184268	686	1.27E-72
rassf6	ENSDARG00000000804	5.71E-55	15.57123891	0.032685319	396	7.69E-54
telo2	ENSDARG00000000830	0.187299395	0.887892108	0.001797592	81	0.421004943
snx9a	ENSDARG00000000837	8.37E-09	5.642761396	0.011811237	203	5.04E-08
dstyk	ENSDARG00000000853	0.869271262	-1.122952952	-0.002422921	212	0.884263997
mapk14a	ENSDARG00000000857	0.000742102	3.17775447	0.006639015	572	0.002997582
scrib	ENSDARG00000000861	1.11E-20	9.251656803	0.019467019	3077	9.59E-20
zgc:56699	ENSDARG00000000887	0.710152908	-0.553831476	-0.001193594	23	0.773257037
skap2	ENSDARG00000000906	0.157838565	1.003380869	0.002032785	60	0.365541694
unk	ENSDARG00000000935	0.090254049	1.339192242	0.002751439	135	0.230527555
dzip1	ENSDARG00000000943	5.67E-19	8.820978886	0.018544392	758	4.74E-18
ncor2	ENSDARG00000000966	1.18E-65	17.07296393	0.035978583	4749	1.74E-64
myh9b	ENSDARG00000001014	0	45.11921049	0.095178383	4158	0
znf384l	ENSDARG00000001015	0.135794113	1.099412397	0.002257427	556	0.324262766
bysl	ENSDARG00000001057	0.690409894	-0.497012534	-0.001099106	76	0.765604221
slc17a6a	ENSDARG00000001127	0.634251661	-0.343135296	-0.000755158	15	0.742122183
dicer1	ENSDARG00000001129	0.02184487	2.01705532	0.004195758	1464	0.067214187
rimbp2	ENSDARG00000001154	0	62.84875789	0.132374275	343	0
matr3l1.1	ENSDARG00000001162	0.000176632	3.572741657	0.007472239	551	0.000768113
hsd17b8	ENSDARG00000001169	7.66E-23	9.768825094	0.020444937	118	6.91E-22
arl14ep	ENSDARG00000001210	0.60504774	-0.266434601	-0.000583925	12	0.742122183
mycbp2	ENSDARG00000001220	0.000992359	3.092509563	0.006467036	3484	0.003928171
map4k2	ENSDARG00000001234	0.00664214	2.476055821	0.005039896	28	0.022967187
puf60b	ENSDARG00000001241	0.00821112	2.399393878	0.004992038	290	0.027855229
srrm1	ENSDARG00000001244	0.000353388	3.386937386	0.007086399	1397	0.001484893
pcgf1	ENSDARG00000001249	0.177793044	0.923808387	0.001861472	55	0.403596133
gas2a	ENSDARG00000001259	3.72E-13	7.171146144	0.015051429	365	2.66E-12
psmb8a	ENSDARG00000001303	NA	NA	NA	0	1
g2e3	ENSDARG00000001313	1.38E-07	5.138719178	0.01074695	195	7.80E-07
slc6a22.2	ENSDARG00000001354	0.531508638	-0.079062735	-0.000194388	8	0.742122183
mctp2a	ENSDARG00000001414	1.48E-06	4.673714994	0.009772012	226	7.80E-06
actn3b	ENSDARG00000001431	0.005062575	2.571525717	0.005362622	650	0.017907129
slc2a1a	ENSDARG00000001437	0.540075548	-0.100624052	-0.000229788	4	0.742122183
inppl1b	ENSDARG00000001442	0.607909414	-0.273874365	-0.000608012	12	0.742122183
mier1b	ENSDARG00000001447	0.000582535	3.247296505	0.006755223	135	0.002386549
adam8a	ENSDARG00000001452	0.624554521	-0.317464783	-0.00069323	13	0.742122183
tdh2	ENSDARG00000001463	2.45E-05	4.060822973	0.008382445	47	0.000116672
mhc1zea	ENSDARG00000001470	0.621759822	-0.310105993	-0.000682203	13	0.742122183
skap1	ENSDARG00000001498	0.04036743	1.746438066	0.003550419	32	0.115529292
sp3a	ENSDARG00000001549	0.015046046	2.168876088	0.004500912	201	0.048214385
tomm34	ENSDARG00000001557	0.644149076	-0.369571422	-0.00083131	60	0.744866593
kifc1	ENSDARG00000001558	0.001502092	2.967309402	0.006174687	158	0.005793561
csmd2	ENSDARG00000001559	3.84E-164	27.27827129	0.057444545	471	8.89E-163
prf1.3	ENSDARG00000001572	0.80584864	-0.862699477	-7.27E-05	1	0.833205066
echs1	ENSDARG00000001578	0.63722589	-0.35105349	-0.00078716	32	0.742464798
nfyal	ENSDARG00000001621	0.335571607	0.424579535	0.000826915	72	0.656686574
kirrel1a	ENSDARG00000001634	9.11E-203	30.36058499	0.064016651	2313	2.36E-201
psmb13a	ENSDARG00000001656	0.365017193	0.345079791	-5.57E-05	1	0.696208115
gpm6bb	ENSDARG00000001676	3.59E-36	12.50317657	0.026318403	1060	4.00E-35
uckl1a	ENSDARG00000001686	8.31E-05	3.765597903	0.007536631	15	0.000374868
flot1a	ENSDARG00000001710	0.817782368	-0.90694617	-0.001956552	75	0.842545902
si:ch211-247n2.1	ENSDARG00000001712	0.387163386	0.286719935	0.000524757	22	0.72984597
oc90	ENSDARG00000001721	0	160.9020559	0.339500619	1552	0
strn3	ENSDARG00000001729	0.079869192	1.405951984	0.002905206	863	0.207982813
gulp1a	ENSDARG00000001733	4.20E-27	10.71771473	0.022542529	671	4.10E-26
fkbp8	ENSDARG00000001734	0.079142933	1.41086011	0.002905749	196	0.206319857
noc2l	ENSDARG00000001754	1.03E-12	7.030075173	0.014759419	511	7.26E-12
tnxba	ENSDARG00000001760	0.667707989	-0.433592995	-0.000940556	17	0.754404114
slc29a2	ENSDARG00000001767	0.218630714	0.776826013	0.001559362	59	0.47438083
ptpra	ENSDARG00000001769	2.39E-07	5.035073467	0.010564506	1568	1.33E-06
otol1a	ENSDARG00000001771	0.000162479	3.594546007	0.007191018	20	0.000710146
stim2b	ENSDARG00000001776	0.00602737	2.510537862	0.005237946	2068	0.021013168
nup155	ENSDARG00000001777	0.084006461	1.37861684	0.002837275	170	0.216664537
tspan11	ENSDARG00000001781	0.161257243	0.98930388	0.002005862	67	0.372489607
prkacba	ENSDARG00000001782	0.567455335	-0.169899302	-0.000384402	7	0.742122183
irx2a	ENSDARG00000001785	0.015072717	2.168174207	0.00443335	40	0.048281924
atp5po	ENSDARG00000001788	1.31E-08	5.565436684	0.011652744	218	7.81E-08
kcnh6a	ENSDARG00000001803	0.847697788	-1.026609402	-0.002197157	51	0.867032507
zgc:112148	ENSDARG00000001804	0.582782585	-0.209017176	-0.000461859	7	0.742122183
tnfrsf21	ENSDARG00000001807	0	104.2088033	0.21966973	533	0
zmp:0000000521	ENSDARG00000001817	0.270515414	0.611254923	0.00121956	85	0.559216375
c3b.2	ENSDARG00000001818	0.504047262	-0.010145154	-8.14E-05	28	0.742122183
cfap43	ENSDARG00000001825	6.22E-19	8.810661299	0.018391934	80	5.19E-18
zgc:112982	ENSDARG00000001829	0.344055088	0.40142102	0.000784974	339	0.669644016
nalcn	ENSDARG00000001835	8.77E-39	12.97240664	0.027151892	111	1.01E-37
aff4	ENSDARG00000001857	0.01659129	2.129867183	0.004432902	1027	0.052600888
dbx1b	ENSDARG00000001859	0.552997526	-0.133238268	-0.000309109	7	0.742122183
atp1a1a.4	ENSDARG00000001870	0	94.89981603	0.200044267	528	0
phgdh	ENSDARG00000001873	2.62E-15	7.820828651	0.016430071	596	1.99E-14
nav2b	ENSDARG00000001879	1.22E-14	7.624543356	0.016023499	980	9.11E-14
stx3a	ENSDARG00000001880	0.00413244	2.641052946	0.005505008	425	0.014866908
cacnb3a	ENSDARG00000001881	0.025673545	1.948567556	0.004011816	69	0.077647404
kbtbd12	ENSDARG00000001882	0.542379466	-0.106430156	-0.000254163	5	0.742122183
ppm1ba	ENSDARG00000001888	0.000292083	3.438861874	0.007194128	1003	0.001239771
tuba1a	ENSDARG00000001889	1.61E-71	17.84413405	0.03739169	125	2.46E-70
stt3b	ENSDARG00000001890	1.50E-27	10.81239213	0.022760799	2777	1.48E-26
syt14b	ENSDARG00000001891	2.98E-150	26.08114848	0.054733614	130	6.55E-149
man2b1	ENSDARG00000001897	0.007909954	2.413044028	0.004995605	98	0.026912554
manea	ENSDARG00000001898	0.661818585	-0.417431485	-0.000905083	19	0.751372745
si:dkey-247m21.3	ENSDARG00000001906	1.08E-07	5.184623586	0.010309875	13	6.14E-07
vill	ENSDARG00000001909	0.686392218	-0.485649682	-0.001053636	23	0.763274805
rorab	ENSDARG00000001910	3.14E-06	4.51687635	0.009434178	203	1.61E-05
drd4-rs	ENSDARG00000001912	6.87E-31	11.49642261	0.023671846	38	7.13E-30
palmda	ENSDARG00000001913	0.299925339	0.524615257	0.001018026	31	0.604443506
pink1	ENSDARG00000001929	0.168499396	0.960112116	0.001955152	139	0.386326605
klhl15	ENSDARG00000001930	0.625631289	-0.320304618	-0.000733914	169	0.742122183
prkag2b	ENSDARG00000001933	0.356623962	0.367497544	0.000704086	49	0.689236965
LO018422.1	ENSDARG00000001937	0.6322203	-0.337739639	-0.000743501	15	0.742122183
b3gat3	ENSDARG00000001939	0.19931319	0.844076997	0.001711198	134	0.439837819
dnajc1	ENSDARG00000001940	0.139452967	1.08278034	0.002209187	108	0.331623459
ak1	ENSDARG00000001950	0.663273034	-0.421412446	-0.000941367	67	0.752133552
pfkfb3	ENSDARG00000001953	0.012858193	2.230468048	0.004628352	172	0.041819412
dock5	ENSDARG00000001968	2.79E-143	25.45921576	0.053609376	659	6.02E-142
txlng	ENSDARG00000001969	0.019428572	2.065696514	0.004261781	80	0.060491173
cthrc1b	ENSDARG00000001971	0.600667212	-0.255074479	-0.000565307	11	0.742122183
hsd11b2	ENSDARG00000001975	0.185593744	0.894251231	0.001785929	33	0.418005672
fkbp16	ENSDARG00000001976	0.000404548	3.349664029	0.006946929	74	0.001686996
myhb	ENSDARG00000001993	0.135078949	1.102699005	0.002229619	41	0.322912396
stxbp1a	ENSDARG00000001994	1.45E-24	10.16322338	0.021219763	92	1.35E-23
adamts18	ENSDARG00000001999	3.88E-58	16.03098126	0.033670833	259	5.37E-57
lmcd1	ENSDARG00000002002	0.003574367	2.689835066	0.005534498	45	0.013001898
rxrbb	ENSDARG00000002006	0.004396291	2.62001527	0.005458766	326	0.015722207
grb10a	ENSDARG00000002013	1.86E-87	19.7886933	0.041701674	1883	3.14E-86
ppil2	ENSDARG00000002016	0.120848558	1.170755385	0.002407411	486	0.293952148
rictorb	ENSDARG00000002020	0.010133526	2.32136688	0.004821603	198	0.033811501
pygb	ENSDARG00000002021	0.042633617	1.720909574	0.003553482	137	0.12069425
qkib	ENSDARG00000002026	0	38.13874519	0.080432201	2107	0
tox4a	ENSDARG00000002031	0.235079903	0.722219063	0.001456165	140	0.502738758
pfkfb2b	ENSDARG00000002037	0.091159445	1.333649081	0.00272526	73	0.232541906
brf2	ENSDARG00000002060	0.717773625	-0.576240329	-0.001239693	26	0.777467985
adss2	ENSDARG00000002071	0.04751945	1.669396131	0.003433632	87	0.132740705
mnat1	ENSDARG00000002077	1.63E-05	4.154373699	0.008687104	285	7.90E-05
csnk2a1	ENSDARG00000002082	0.000424665	3.336197041	0.006971621	471	0.001767184
lamb2	ENSDARG00000002084	1.68E-19	8.956071541	0.018804564	395	1.43E-18
si:dkeyp-52c3.7	ENSDARG00000002097	0.56849345	-0.172539895	-6.30E-05	2	0.742122183
stam	ENSDARG00000002127	0.600922117	-0.255734614	-0.000596841	105	0.742122183
cwf19l1	ENSDARG00000002128	0.31571454	0.479716379	0.000933657	42	0.625498223
celf2	ENSDARG00000002131	2.10E-204	30.48438185	0.064278567	2311	5.49E-203
psme1	ENSDARG00000002165	0.550922374	-0.127992067	-0.000305498	7	0.742122183
cacnb1	ENSDARG00000002167	1.96E-65	17.04318648	0.03585988	402	2.88E-64
tra2b	ENSDARG00000002168	0.050276977	1.642173976	0.003386002	128	0.139420745
aplnra	ENSDARG00000002172	3.71E-07	4.949855839	0.010261238	105	2.04E-06
itfg2	ENSDARG00000002174	0.029575975	1.887062282	0.003884975	85	0.087718343
igbp1	ENSDARG00000002184	0.727477148	-0.60520062	-0.001313134	37	0.783695646
chmp2bb	ENSDARG00000002190	0.003152508	2.731482116	0.005675411	150	0.011559941
aspn	ENSDARG00000002192	0.629624487	-0.330858955	-0.000721686	14	0.742122183
rho	ENSDARG00000002193	0.130505369	1.124005392	0.00220454	15	0.313571364
rhd	ENSDARG00000002194	0.650133504	-0.385680925	-0.000843326	19	0.747163593
bach1b	ENSDARG00000002196	0.000609145	3.234563216	0.0067362	155	0.002488086
pygl	ENSDARG00000002197	0.013601551	2.208590989	0.004490957	28	0.044026924
hspb11	ENSDARG00000002204	NA	NA	NA	1	1
stk25a	ENSDARG00000002210	1.40E-82	19.21438404	0.040275149	121	2.31E-81
invs	ENSDARG00000002213	0.157284017	1.005683102	0.00205703	276	0.364452995
rtca	ENSDARG00000002215	0.055826238	1.590809408	0.00329174	374	0.152756503
tbx3a	ENSDARG00000002216	0.004354696	2.623255561	0.005401992	46	0.015590678
scocb	ENSDARG00000002217	0.012026133	2.256293351	0.004658238	76	0.039540397
si:dkey-103j14.5	ENSDARG00000002219	0.188934348	0.881830094	0.001761371	34	0.423870386
C5H9orf78	ENSDARG00000002220	0.157385808	1.005260113	0.002015997	34	0.364623599
sypb	ENSDARG00000002230	0.616922064	-0.297406905	-0.000674139	37	0.742122183
plpp2a	ENSDARG00000002231	0	61.43053938	0.129594909	2438	0
mmp14a	ENSDARG00000002235	4.48E-07	4.91328438	0.010280033	221	2.45E-06
psmb6	ENSDARG00000002240	0.154434457	1.017598261	0.00207967	205	0.358620355
kcna2a	ENSDARG00000002241	0.886433911	-1.207779268	-7.75E-05	1	0.897421186
tbxas1	ENSDARG00000002249	3.53E-20	9.126718604	0.019190006	776	3.04E-19
epb41l3a	ENSDARG00000002255	0.526273217	-0.065904866	-0.000197603	49	0.742122183
ca15c	ENSDARG00000002259	0.634982807	-0.345079791	-6.54E-05	1	0.742122183
mrpl41	ENSDARG00000002264	0.539106579	-0.098183176	-0.000231113	4	0.742122183
dcaf13	ENSDARG00000002267	0.032086245	1.85097959	0.003802893	66	0.094267224
zfand5b	ENSDARG00000002271	0.068817688	1.484654479	0.003072186	1286	0.182676602
mcoln1a	ENSDARG00000002285	0.91008481	-1.341277479	-0.002875217	132	0.91956745
si:ch211-197g15.6	ENSDARG00000002293	0.540005789	-0.100448306	-0.000236541	5	0.742122183
si:dkey-21p1.3	ENSDARG00000002295	0.540234072	-0.101023437	-0.000240223	4	0.742122183
ankrd22	ENSDARG00000002298	0.11859546	1.182037251	0.002410285	66	0.289495018
arsh	ENSDARG00000002299	4.69E-06	4.430910383	0.00917582	55	2.37E-05
p2rx2	ENSDARG00000002300	0.652489345	-0.392049946	-0.000857136	18	0.748101397
gins2	ENSDARG00000002304	3.98E-09	5.769499074	0.012024231	102	2.44E-08
me3	ENSDARG00000002305	0.806640785	-0.865583822	-0.001881145	180	0.833687658
fabp11b	ENSDARG00000002311	0.849721432	-1.035239372	-7.51E-05	2	0.867032507
lhx8a	ENSDARG00000002330	0.521390049	-0.053642616	-0.00012927	2	0.742122183
frmd6	ENSDARG00000002332	0.001934547	2.888641966	0.00603324	894	0.007325136
fam102bb	ENSDARG00000002333	0.000186601	3.558342534	0.007445997	939	0.000809157
dlc	ENSDARG00000002336	2.33E-06	4.579147688	0.009403549	36	1.21E-05
sgf29	ENSDARG00000002339	0.073309579	1.451577357	0.002925383	32	0.192711023
tubb4b	ENSDARG00000002344	0.003569291	2.690309341	0.005611337	552	0.012987082
cyp11a1	ENSDARG00000002347	0.302361822	0.517619686	-5.33E-05	2	0.604443506
tagapa	ENSDARG00000002353	9.60E-08	5.206895091	0.010873989	124	5.47E-07
shpk	ENSDARG00000002355	0.598518181	-0.249513451	-0.000552006	10	0.742122183
ubald1a	ENSDARG00000002362	3.72E-13	7.170963193	0.015062857	732	2.66E-12
cers5	ENSDARG00000002365	0.374418533	0.320173164	0.000614204	425	0.710319802
UBB	ENSDARG00000002369	0.055512102	1.593606473	0.003297151	358	0.152016853
mief2	ENSDARG00000002377	0.834807847	-0.973340086	-0.002098229	89	0.857051736
atm	ENSDARG00000002385	3.17E-08	5.408689943	0.011344974	655	1.86E-07
tlcd1	ENSDARG00000002391	0.529869814	-0.074942612	-0.000200403	19	0.742122183
ugt5d1	ENSDARG00000002394	NA	NA	NA	1	1
cry-dash	ENSDARG00000002396	0.002984115	2.749521803	0.005709622	117	0.010993838
gale	ENSDARG00000002401	0.002398825	2.820315123	0.005843803	88	0.008974193
ercc3	ENSDARG00000002402	0.315125732	0.481372942	0.000950362	139	0.624702201
nusap1	ENSDARG00000002403	0.043364588	1.71290958	0.003536321	149	0.122495735
si:ch211-225b11.1	ENSDARG00000002405	0.001264337	3.019888912	0.006299103	271	0.004935356
zmynd10	ENSDARG00000002406	7.34E-21	9.295356942	0.019353845	60	6.39E-20
pde4cb	ENSDARG00000002411	0.001737938	2.922182772	0.006072987	149	0.006641871
prdm1a	ENSDARG00000002445	5.58E-34	12.09541058	0.02542912	381	6.03E-33
arhgef37	ENSDARG00000002463	3.54E-08	5.389147915	0.011279931	215	2.06E-07
rdh14b	ENSDARG00000002467	0.700580113	-0.526069709	-0.001134661	24	0.768066236
ercc6l	ENSDARG00000002479	6.24E-09	5.693044828	0.011917144	220	3.78E-08
wnt7ab	ENSDARG00000002483	1.58E-08	5.531829953	0.011508389	71	9.42E-08
noc3l	ENSDARG00000002487	0.181456491	0.909828461	0.001842362	81	0.410508648
itgb6	ENSDARG00000002494	1.59E-28	11.01669059	0.023165924	502	1.59E-27
C7H16orf87	ENSDARG00000002506	0.571801884	-0.180963492	-0.000440333	117	0.742122183
itga10	ENSDARG00000002507	0.247123631	0.683569163	0.001376282	192	0.520416841
ankrd33ab	ENSDARG00000002508	0.521681681	-0.054374698	-9.97E-05	2	0.742122183
zgc:153911	ENSDARG00000002509	9.82E-07	4.757182013	0.009895102	105	5.24E-06
dmbx1b	ENSDARG00000002510	0.038337285	1.770315665	0.003489172	23	0.110414792
hsdl2	ENSDARG00000002523	0.024322869	1.971683595	0.004086873	210	0.073977178
adora2b	ENSDARG00000002533	0.484599091	0.038613948	1.87E-05	27	0.742122183
tm9sf4	ENSDARG00000002536	0.198766276	0.846036197	0.001722069	384	0.438930185
smu1a	ENSDARG00000002538	0.171640383	0.947702817	0.001925947	102	0.392450795
rundc3ab	ENSDARG00000002546	0.654597291	-0.397762289	-0.000861699	17	0.748461425
eif3eb	ENSDARG00000002549	0.053452402	1.612262615	0.003329392	189	0.147185963
mapkapk2a	ENSDARG00000002552	7.23E-10	6.05037284	0.012710471	3643	4.58E-09
syngr1a	ENSDARG00000002564	1.10E-09	5.982169461	0.012422594	62	6.93E-09
tmod2	ENSDARG00000002571	2.05E-07	5.063987352	0.010622947	1141	1.15E-06
cabp5a	ENSDARG00000002576	NA	NA	NA	0	1
tbx15	ENSDARG00000002582	0.598917156	-0.250545287	-0.000586038	109	0.742122183
dpysl3	ENSDARG00000002587	0	43.72923155	0.092080016	337	0
mylpfb	ENSDARG00000002589	4.89E-26	10.48833359	0.022036553	324	4.68E-25
ruvbl1	ENSDARG00000002591	0.747762562	-0.667465444	-0.001447486	46	0.796290156
slc45a2	ENSDARG00000002593	0.877190681	-1.1610572	-0.002477021	52	0.891234543
pabpc1l	ENSDARG00000002597	0.524737789	-0.062048233	-0.000161533	3	0.742122183
pcsk1	ENSDARG00000002600	5.33E-189	29.29909258	0.061059223	52	1.33E-187
irx7	ENSDARG00000002601	0.023497016	1.98635398	0.004042614	32	0.071742143
unm_sa1614	ENSDARG00000002607	5.34E-18	8.566292039	0.017955657	188	4.34E-17
rnf145a	ENSDARG00000002609	5.47E-32	11.71298642	0.024585803	213	5.76E-31
rpa3	ENSDARG00000002613	0.665204093	-0.426708286	-0.000919808	19	0.752872508
anxa11b	ENSDARG00000002632	0.004448679	2.615973014	0.005437013	198	0.015891999
b4galt1	ENSDARG00000002634	3.24E-19	8.883440776	0.018597093	139	2.73E-18
zgc:85722	ENSDARG00000002635	0.002708134	2.78117407	0.005741183	54	0.010058674
sh3gl1b	ENSDARG00000002642	0.086120998	1.365035172	0.002815736	371	0.221390476
rgs5a	ENSDARG00000002644	0.000754038	3.173125141	0.006504943	34	0.003039387
stxbp5a	ENSDARG00000002656	0	49.10086725	0.103431062	403	0
mapre1b	ENSDARG00000002659	0.019854739	2.056758323	0.004273037	379	0.061662338
optn	ENSDARG00000002663	1.67E-07	5.103243087	0.010596034	64	9.37E-07
kcnj1b	ENSDARG00000002666	0.539652498	-0.099558297	-0.00024065	5	0.742122183
ATG14	ENSDARG00000002670	0.782220989	-0.779716061	-0.001695409	110	0.81818154
tbcela	ENSDARG00000002682	0.09467385	1.31251123	0.002694785	127	0.24004067
fam113	ENSDARG00000002685	0.9577722	-1.725398954	-8.48E-05	1	0.960480181
rabif	ENSDARG00000002690	0.680182058	-0.468207955	-0.001014804	21	0.759794376
gnb3b	ENSDARG00000002696	0.463071018	0.092699826	0.000125037	17	0.742122183
rasl12	ENSDARG00000002701	2.53E-09	5.845003618	0.012094812	47	1.57E-08
her11	ENSDARG00000002707	0.560429573	-0.152058427	-0.00034522	6	0.742122183
ncl	ENSDARG00000002710	3.41E-11	6.524735559	0.013698824	656	2.28E-10
utp15	ENSDARG00000002720	0.118874587	1.180631427	0.002419676	145	0.290066987
ankrd2	ENSDARG00000002722	0.568019519	-0.171334235	-0.00037949	6	0.742122183
kiss1ra	ENSDARG00000002728	0.607989368	-0.274082445	-0.000606585	12	0.742122183
sdc2	ENSDARG00000002731	2.93E-31	11.56980253	0.024360067	3045	3.06E-30
spon2b	ENSDARG00000002732	0.533958645	-0.085224755	-0.000209748	8	0.742122183
tdh	ENSDARG00000002745	0.363219433	0.349866531	0.000677103	535	0.696208115
sema6d	ENSDARG00000002748	0.359186125	0.360635096	0.000692568	76	0.693190298
phf20a	ENSDARG00000002750	0.113280517	1.209265047	0.00245295	53	0.279059806
pdcd2l	ENSDARG00000002754	0.775668809	-0.757646923	-0.001622108	34	0.813467843
dedd1	ENSDARG00000002758	7.87E-34	12.06719064	0.025405765	1784	8.49E-33
gdf5	ENSDARG00000002760	0.277203888	0.591168128	0.001166778	48	0.570146505
miox	ENSDARG00000002764	0.559318174	-0.149240768	-0.000345083	6	0.742122183
pvalb2	ENSDARG00000002768	4.33E-34	12.11627586	0.025501843	977	4.69E-33
si:ch211-48m9.1	ENSDARG00000002771	0.26691008	0.622185104	0.001230525	43	0.553373935
pdx1	ENSDARG00000002779	0.542010698	-0.105500587	-0.00024638	4	0.742122183
tle3a	ENSDARG00000002787	9.41E-26	10.42626506	0.021937095	1160	8.97E-25
ap2m1a	ENSDARG00000002790	0.009990303	2.326711866	0.004845961	625	0.033380943
atp1a1a.1	ENSDARG00000002791	1.82E-12	6.950851584	0.014608778	1927	1.27E-11
arcn1a	ENSDARG00000002792	0.009845989	2.332165662	0.004836903	128	0.032928487
meis3	ENSDARG00000002795	1.00E-09	5.997319439	0.012492067	82	6.33E-09
BX908804.1	ENSDARG00000002797	0.548233521	-0.121199579	-0.000269411	5	0.742122183
cog8	ENSDARG00000002798	0.777004026	-0.762114034	-0.001633606	30	0.814506552
rasgrf2b	ENSDARG00000002816	3.51E-16	8.070117927	0.016580267	35	2.74E-15
cep57l1	ENSDARG00000002826	0.773982356	-0.752026226	-0.001608982	34	0.812188991
trmt2a	ENSDARG00000002830	0.614784884	-0.29181218	-0.000664711	42	0.742122183
col4a4	ENSDARG00000002831	0.023114835	1.993290285	0.004072052	47	0.070751779
si:dkey-28b4.8	ENSDARG00000002840	4.02E-08	5.366069126	0.011233052	214	2.33E-07
fndc1	ENSDARG00000002847	0	67.60020103	0.142362495	306	0
zgc:113210	ENSDARG00000002872	0.817585132	-0.906200506	-0.001949111	59	0.842409736
reps1	ENSDARG00000002877	0.563941201	-0.160969279	-0.000399709	365	0.742122183
vps50	ENSDARG00000002880	5.86E-05	3.851949555	0.008068642	1872	0.000269215
aven	ENSDARG00000002894	0.044048385	1.705523835	0.003530508	270	0.124115877
si:ch211-160o17.2	ENSDARG00000002897	0.822754469	-0.925913257	-0.001976653	37	0.846657872
tjp3	ENSDARG00000002909	2.18E-62	16.62820479	0.035032274	2155	3.13E-61
adipor1a	ENSDARG00000002912	3.77E-51	14.99814726	0.031515572	248	4.95E-50
sec31b	ENSDARG00000002916	0.023660758	1.983411213	0.004105399	147	0.072183851
gls2b	ENSDARG00000002917	0.52464573	-0.061817033	-0.000152797	2	0.742122183
gbx2	ENSDARG00000002933	4.81E-31	11.52718236	0.023333501	18	5.00E-30
meis1a	ENSDARG00000002937	0	74.58365775	0.157331528	1600	0
bgnb	ENSDARG00000002945	0.032562993	1.844392322	0.003646091	14	0.095505325
abcd3b	ENSDARG00000002947	0.22107523	0.768566904	0.001517171	30	0.478882276
ppp6c	ENSDARG00000002949	0.476990298	0.057708785	6.02E-05	88	0.742122183
smo	ENSDARG00000002952	0.000100744	3.717143869	0.007779081	701	0.000449966
si:dkey-32n7.4	ENSDARG00000002956	0.649280531	-0.383378777	-0.00083584	15	0.74698533
gpr34b	ENSDARG00000002959	0.916255801	-1.380319163	-7.99E-05	1	0.923604112
pdap1b	ENSDARG00000002967	0.466869532	0.083141454	0.000112783	55	0.742122183
a1cf	ENSDARG00000002968	0.645870108	-0.374194274	-0.000814896	15	0.745318078
ss18	ENSDARG00000002970	0.001451578	2.977810339	0.006216899	493	0.005614618
phc1	ENSDARG00000002971	0.634982472	-0.3450789	-0.00078403	111	0.742122183
gda	ENSDARG00000002986	0.677013938	-0.459364936	-0.000991394	20	0.758086965
tnnt2d	ENSDARG00000002988	0.018270846	2.090847986	0.004332538	135	0.05732777
cep135	ENSDARG00000002991	0.591984784	-0.232653563	-0.000548087	110	0.742122183
itpkca	ENSDARG00000002994	0.436505317	0.159835531	0.000273927	98	0.742122183
prkcea	ENSDARG00000003008	0	43.08963793	0.090887927	2784	0
ube2al	ENSDARG00000003017	0.073766862	1.448298008	0.002981865	140	0.193846706
lrrc4.2	ENSDARG00000003020	0.113566089	1.207779268	-4.36E-05	1	0.279059806
hdac8	ENSDARG00000003021	0.031440374	1.860033773	0.003861307	559	0.092611395
limk1b	ENSDARG00000003022	8.16E-10	6.030750483	0.012620934	213	5.17E-09
scnm1	ENSDARG00000003027	0.593758975	-0.237225249	-0.000530823	12	0.742122183
eif4a1b	ENSDARG00000003032	0.093778931	1.317838066	0.00271561	345	0.238284993
hspa9	ENSDARG00000003035	2.56E-22	9.645790277	0.020293317	1405	2.29E-21
CABZ01111496.1	ENSDARG00000003041	0.12631101	1.144003899	0.002343198	152	0.305021887
sorbs2a	ENSDARG00000003046	3.92E-05	3.949388428	0.008251615	243	0.000183093
tacr3l	ENSDARG00000003054	0.716468787	-0.572383155	-0.001236196	24	0.776671963
fgfr1op	ENSDARG00000003058	0.003505047	2.696364344	0.005621461	395	0.012776669
cd276	ENSDARG00000003061	2.35E-41	13.41882557	0.028252368	1339	2.79E-40
gorasp1a	ENSDARG00000003068	0.211550366	0.8010534	0.001622398	147	0.461960199
btbd7	ENSDARG00000003069	0.013292422	2.217560065	0.004617285	858	0.043107137
gpx9	ENSDARG00000003077	0.560198732	-0.151473092	-0.000349515	7	0.742122183
mybphb	ENSDARG00000003081	1.38E-23	9.941137753	0.020890615	404	1.26E-22
spire2	ENSDARG00000003084	0.74311275	-0.652971737	-0.001408024	26	0.793560244
stambpl1	ENSDARG00000003085	0.174518423	0.936459129	0.001910202	234	0.397696797
ubxn6	ENSDARG00000003087	0.344770736	0.399477402	0.000776064	89	0.670835191
or103-4	ENSDARG00000003090	0.515473108	-0.038795059	-0.000111957	2	0.742122183
oclnb	ENSDARG00000003091	9.21E-07	4.769953025	0.009925075	124	4.93E-06
kdm5bb	ENSDARG00000003098	0.412629341	0.220786493	0.000405142	784	0.742122183
rcan1a	ENSDARG00000003109	0.093770316	1.317889526	0.002713069	230	0.238284993
ada	ENSDARG00000003113	0.030625613	1.871677566	0.003800852	29	0.090448085
zgc:123105	ENSDARG00000003127	0.00192602	2.890030873	0.005999371	115	0.007296051
dachc	ENSDARG00000003142	2.23E-235	32.73823804	0.069020085	1248	6.23E-234
pxmp2	ENSDARG00000003144	0.626438392	-0.322434942	-0.000703219	17	0.742122183
si:dkey-27m7.4	ENSDARG00000003146	NA	NA	NA	0	1
skp1	ENSDARG00000003151	0.029899829	1.882267846	0.003904782	339	0.088516621
nudt21	ENSDARG00000003153	0.523145931	-0.058050832	-0.000181781	71	0.742122183
nfkbil1	ENSDARG00000003157	0.604447443	-0.264875835	-0.000586716	11	0.742122183
nr2f6b	ENSDARG00000003165	2.38E-121	23.39538038	0.049290022	867	4.75E-120
mlst8	ENSDARG00000003167	0.291700802	0.548422829	0.001082779	54	0.593021135
magi1b	ENSDARG00000003169	2.82E-109	22.1776546	0.046749653	2993	5.33E-108
stx5al	ENSDARG00000003175	0.723319991	-0.592732753	-0.001307228	189	0.780992544
sult1st4	ENSDARG00000003181	0.530685298	-0.076992635	-0.000193173	4	0.742122183
psmd1	ENSDARG00000003189	1.71E-13	7.276473079	0.015296027	1967	1.24E-12
rassf7b	ENSDARG00000003193	6.23E-94	20.52663593	0.043269058	5058	1.09E-92
wdr21	ENSDARG00000003197	0.525220712	-0.063261119	-0.000151538	3	0.742122183
foxm1	ENSDARG00000003200	0.06286364	1.531170415	0.003147442	92	0.1687386
rhcga	ENSDARG00000003203	0.052993001	1.616501163	0.003249091	25	0.146076311
ngly1	ENSDARG00000003205	0.521330042	-0.053491985	-0.000171869	49	0.742122183
chchd6a	ENSDARG00000003206	0.033807366	1.827565866	0.00379184	468	0.098718882
mterf3	ENSDARG00000003207	0.597340526	-0.246469323	-0.0005468	12	0.742122183
pomk	ENSDARG00000003208	0.226963572	0.748883969	0.001489423	34	0.488978266
ano2a	ENSDARG00000003210	0.582941853	-0.209425237	-0.000456171	7	0.742122183
naa15a	ENSDARG00000003213	0.012057554	2.255290375	0.004689591	333	0.039623581
anxa2a	ENSDARG00000003216	0.182292585	0.906662744	0.001835722	70	0.412040124
urb2	ENSDARG00000003217	0.004211725	2.634607991	0.005479907	196	0.015122728
bin2a	ENSDARG00000003219	0.722209944	-0.589419181	-0.001268904	26	0.780249514
gdf9	ENSDARG00000003229	0.568679932	-0.173014364	-0.00038688	6	0.742122183
nup88	ENSDARG00000003235	0.049587253	1.648868852	0.00339687	106	0.137847665
gbp3	ENSDARG00000003244	0.001576775	2.952359951	0.006119233	94	0.006066251
pik3cd	ENSDARG00000003250	0.638766986	-0.355164942	-0.000777769	19	0.742887475
zbtb22b	ENSDARG00000003251	0.658294006	-0.407811613	-0.000890641	18	0.749903138
zgc:101559	ENSDARG00000003257	0.585241125	-0.215320112	-0.000480647	11	0.742122183
loxa	ENSDARG00000003259	0.531588983	-0.079264762	-0.000190608	3	0.742122183
clcn3	ENSDARG00000003269	1.34E-05	4.19976104	0.008801728	1568	6.52E-05
dhps	ENSDARG00000003270	0.436276128	0.160417436	0.000275193	83	0.742122183
pik3ip1	ENSDARG00000003281	0.684957573	-0.48160742	-0.001065035	60	0.762553393
wdr12	ENSDARG00000003287	0.361537382	0.354352452	0.000665166	30	0.696208115
dab1b	ENSDARG00000003290	0.14112598	1.075274251	0.00215455	31	0.334557214
sox9a	ENSDARG00000003293	9.33E-06	4.280447815	0.008931335	150	4.61E-05
stc1	ENSDARG00000003303	4.34E-22	9.591522094	0.019838182	37	3.86E-21
stx16	ENSDARG00000003307	0.629286161	-0.32996332	-0.000754208	175	0.742122183
emc2	ENSDARG00000003308	0.069447296	1.479920019	0.003061697	1034	0.184102528
pank2	ENSDARG00000003311	0.776660123	-0.760962016	-0.001658715	129	0.814239944
eps8l1b	ENSDARG00000003313	0.001311905	3.008684939	0.006269032	233	0.005111791
fam91a1	ENSDARG00000003320	0.085530836	1.36880041	0.002825008	482	0.22002674
cacng5a	ENSDARG00000003326	0.616248986	-0.295643922	-0.000651086	16	0.742122183
slf2	ENSDARG00000003328	0.73003195	-0.612909622	-0.001350641	261	0.785422889
trpc2b	ENSDARG00000003344	0.709685266	-0.552465496	-0.001194376	29	0.773072948
commd2	ENSDARG00000003373	0.732897647	-0.621600327	-0.001330551	22	0.787075306
gng12a	ENSDARG00000003375	1.63E-06	4.653909634	0.009757956	992	8.56E-06
si:dkey-275b16.2	ENSDARG00000003380	NA	NA	NA	0	1
si:ch211-266g18.6	ENSDARG00000003381	0	40.39723541	0.08511623	550	0
cwc25	ENSDARG00000003382	0.500997871	-0.002501295	-6.58E-05	63	0.742122183
asb8	ENSDARG00000003383	0.335811638	0.42392121	0.000821024	49	0.657056973
col4a3	ENSDARG00000003395	0.192322343	0.869370182	0.001727936	35	0.429981014
rbpja	ENSDARG00000003398	0.045646578	1.688615407	0.003495162	278	0.128089433
fgf8a	ENSDARG00000003399	9.51E-05	3.731768445	0.007644208	54	0.000425948
tenm1	ENSDARG00000003403	3.49E-34	12.13404469	0.02554333	1355	3.78E-33
foxa2	ENSDARG00000003411	0.365017193	0.345079791	-5.57E-05	1	0.696208115
capslb	ENSDARG00000003414	0.574405576	-0.187601757	-0.000412363	7	0.742122183
chrna5	ENSDARG00000003420	0.629369393	-0.330183632	-0.000720536	14	0.742122183
igf2bp2a	ENSDARG00000003421	1.55E-38	12.9288734	0.027227793	2685	1.78E-37
hnrnpdl	ENSDARG00000003429	0.066684458	1.500948371	0.00309515	171	0.177742844
dhrs7	ENSDARG00000003444	0.273994974	0.600774865	0.001164147	21	0.565010979
ippk	ENSDARG00000003446	0.029711935	1.885044201	0.003902077	175	0.088091312
pde10a	ENSDARG00000003449	0	63.39554132	0.133629235	633	0
fech	ENSDARG00000003462	0.016483172	2.132492941	0.004407318	102	0.052288936
neurod4	ENSDARG00000003469	0.605362628	-0.267252517	-0.000582015	14	0.742122183
sult1st5	ENSDARG00000003475	0.54070682	-0.102214574	-0.000239169	5	0.742122183
ppp1caa	ENSDARG00000003486	1.12E-06	4.729828524	0.009919095	1185	5.98E-06
nup93	ENSDARG00000003487	0.000122667	3.667082666	0.007662666	330	0.000542643
madd	ENSDARG00000003495	4.01E-98	20.99049492	0.044222933	969	7.17E-97
anks1b	ENSDARG00000003512	3.47E-35	12.32159814	0.025915499	513	3.83E-34
impa1	ENSDARG00000003517	0.398955375	0.256051916	0.000458066	21	0.742122183
aprt	ENSDARG00000003519	0.695738194	-0.512182039	-0.001131473	77	0.766528653
tbc1d14	ENSDARG00000003520	1.08E-28	11.05150855	0.023223889	345	1.08E-27
itln3	ENSDARG00000003523	0.52488975	-0.062429882	-0.000172208	4	0.742122183
psma5	ENSDARG00000003526	0.011511549	2.273051136	0.004693157	84	0.037993248
mak16	ENSDARG00000003527	0.484250957	0.039487256	2.23E-05	123	0.742122183
tcea1	ENSDARG00000003531	0.06989566	1.476568578	0.003032753	89	0.185027202
col8a1b	ENSDARG00000003533	0.546782181	-0.117535596	-0.000271307	5	0.742122183
adarb1b	ENSDARG00000003544	1.05E-306	37.41659521	0.078919212	4165	3.49E-305
gnrhr2	ENSDARG00000003553	0.52267593	-0.056870767	-0.00010035	2	0.742122183
dohh	ENSDARG00000003564	0.754780899	-0.689612028	-0.001480963	32	0.798139936
hsp90b1	ENSDARG00000003570	1.40E-102	21.47286647	0.045248981	1237	2.56E-101
dctn5	ENSDARG00000003573	0.605387673	-0.267317577	-0.000590379	11	0.742122183
klhl32	ENSDARG00000003576	0.614524532	-0.291131257	-0.000667513	58	0.742122183
pla2g7	ENSDARG00000003584	0.66811298	-0.434708483	-0.000960213	37	0.754556313
surf1	ENSDARG00000003592	0.631603526	-0.336103329	-0.000749153	28	0.742122183
rpl3	ENSDARG00000003599	1.18E-06	4.72036563	0.009898932	1153	6.25E-06
nr2f6a	ENSDARG00000003607	2.68E-07	5.013049024	0.010506979	479	1.49E-06
slc26a3.2	ENSDARG00000003615	0.521796463	-0.05466284	-0.000141127	2	0.742122183
arih1	ENSDARG00000003616	0.536053042	-0.090494938	-0.000251197	341	0.742122183
clockb	ENSDARG00000003631	0.016360953	2.135478965	0.004434447	262	0.051933039
zgc:172270	ENSDARG00000003632	0.565794135	-0.16567626	-0.000379289	7	0.742122183
mogat3b	ENSDARG00000003635	0.699885643	-0.524071639	-0.001128574	29	0.767825053
tfg	ENSDARG00000003641	0.004113516	2.642607585	0.005506788	335	0.014802941
zfyve19	ENSDARG00000003642	0.343265521	0.403567156	0.000783047	71	0.668588689
tmem59l	ENSDARG00000003655	0.5174386	-0.043726018	-0.000151467	50	0.742122183
cryl1	ENSDARG00000003675	0.57190159	-0.181217549	-0.000417228	8	0.742122183
runx1t1	ENSDARG00000003680	0	94.05682854	0.198423357	1472	0
eif5	ENSDARG00000003681	0.263857223	0.631498781	0.001271191	641	0.548231217
obsl1a	ENSDARG00000003684	0.676177775	-0.457037	-0.001010665	45	0.757899269
hars	ENSDARG00000003693	0.684789616	-0.481134699	-0.001069805	125	0.762506891
vdac3	ENSDARG00000003695	0.18897958	0.881662844	0.001795308	238	0.423935131
slc5a8l	ENSDARG00000003697	0.568580286	-0.17276083	-0.000390591	9	0.742122183
atp7a	ENSDARG00000003699	0.739138564	-0.640691909	-0.001412023	819	0.791141591
cldng	ENSDARG00000003701	NA	NA	NA	0	1
prnprs3	ENSDARG00000003705	0.17730713	0.925676238	0.001881061	109	0.402881634
ryr2b	ENSDARG00000003706	4.48E-32	11.72986288	0.02438251	56	4.73E-31
mitfa	ENSDARG00000003732	0.59568573	-0.242195683	-0.000542318	10	0.742122183
polb	ENSDARG00000003749	0.342290631	0.406219589	0.000792567	135	0.667363631
pfas	ENSDARG00000003750	0.000110504	3.693707472	0.007666806	84	0.000491019
lats1	ENSDARG00000003751	0.375490336	0.317346533	0.000607066	209	0.711987974
tspan2a	ENSDARG00000003754	1.80E-06	4.633099419	0.00970413	444	9.44E-06
cnpy1	ENSDARG00000003757	0.736001312	-0.631065992	-0.001383467	96	0.789188966
tada2b	ENSDARG00000003769	0.745019791	-0.658899326	-0.00141923	30	0.794508415
pip4k2aa	ENSDARG00000003776	0.139772923	1.081340123	0.002219408	575	0.332227471
ctnnd2b	ENSDARG00000003779	1.95E-50	14.88882002	0.031353582	1212	2.54E-49
dennd5b	ENSDARG00000003789	2.75E-05	4.033325333	0.008450148	1377	0.000130488
idh2	ENSDARG00000003795	5.54E-05	3.865677257	0.008090287	564	0.000255191
asb2a.1	ENSDARG00000003797	0.614256062	-0.29042924	-0.000639471	13	0.742122183
LHX3	ENSDARG00000003803	4.09E-66	17.13473413	0.035847817	90	6.03E-65
aqp3a	ENSDARG00000003808	0.02245437	2.005508242	0.004114262	73	0.0688849
plxnb2a	ENSDARG00000003811	0.003360598	2.710351419	0.005655367	719	0.012276043
prkag1	ENSDARG00000003818	0.288665729	0.55728685	0.001112008	218	0.588291449
nr1d2a	ENSDARG00000003820	2.83E-22	9.635627421	0.020227851	287	2.52E-21
ankrd16	ENSDARG00000003822	0.576002191	-0.191676496	-0.00042812	8	0.742122183
snapc1b	ENSDARG00000003827	0.44284628	0.143756746	0.000235333	34	0.742122183
galnt2	ENSDARG00000003829	1.29E-11	6.669005213	0.014014651	2474	8.76E-11
stom	ENSDARG00000003835	0.000933047	3.1107556	0.006490646	332	0.003708695
usb1	ENSDARG00000003841	0.462736806	0.093541212	0.000134169	46	0.742122183
chm	ENSDARG00000003845	0.677288414	-0.460129639	-0.001030535	491	0.758279523
mrpl21	ENSDARG00000003846	0.629774903	-0.331257231	-0.000743266	31	0.742122183
acsl1b	ENSDARG00000003854	8.76E-06	4.294298452	0.008992289	533	4.34E-05
cbx3a	ENSDARG00000003860	0.006042648	2.509643897	0.005212933	163	0.021060203
pard6b	ENSDARG00000003865	5.31E-18	8.567071008	0.018010852	822	4.31E-17
tm9sf2	ENSDARG00000003866	0.137735368	1.090550468	0.002239001	588	0.328141713
cdk20	ENSDARG00000003867	0.015656112	2.153082134	0.004421739	51	0.049940625
decr1	ENSDARG00000003869	0.371848713	0.326960943	0.000624116	85	0.706220706
ccdc102a	ENSDARG00000003872	1.90E-36	12.55354726	0.02642928	1408	2.13E-35
pbrm1	ENSDARG00000003877	0.531851427	-0.079924698	-0.000227258	58	0.742122183
zdhhc23b	ENSDARG00000003899	0.728153242	-0.607237189	-0.001324474	48	0.784053221
gpr61l	ENSDARG00000003900	0.269142517	0.615408419	0.001192341	25	0.556956365
ctsl.1	ENSDARG00000003902	0.517403141	-0.043637051	-0.000123727	2	0.742122183
hapln2	ENSDARG00000003903	NA	NA	NA	0	1
sycp1	ENSDARG00000003904	3.46E-16	8.071848867	0.016712893	44	2.70E-15
ftr01	ENSDARG00000003909	0.546202651	-0.116072987	-0.000276767	5	0.742122183
med13b	ENSDARG00000003910	0.000108233	3.698981636	0.007741319	770	0.00048159
setb	ENSDARG00000003920	0.000264666	3.465456864	0.007234136	246	0.001130813
cx28.6	ENSDARG00000003925	0.610065656	-0.279490159	-0.000620916	14	0.742122183
cldn12	ENSDARG00000003927	0.269320458	0.614869486	0.001230551	128	0.557101965
cndp2	ENSDARG00000003931	0.353047495	0.377105789	0.000723219	44	0.683396062
nxnl2	ENSDARG00000003934	0.269360574	0.61474801	0.001221569	61	0.557140437
rpa1	ENSDARG00000003938	1.21E-14	7.625982629	0.016010513	422	9.01E-14
mtfr1l	ENSDARG00000003940	0.873501755	-1.143101406	-0.002441207	56	0.888078982
rrs1	ENSDARG00000003941	0.28758427	0.560455859	0.001087687	35	0.586574431
nmur1b	ENSDARG00000003944	0.886433911	-1.207779268	-7.75E-05	1	0.897421186
pfn2	ENSDARG00000003952	0.001207328	3.033836008	0.00634011	1088	0.00472615
parp3	ENSDARG00000003961	0.736075394	-0.631292621	-0.001367555	38	0.789235718
traf4a	ENSDARG00000003963	3.66E-94	20.55245867	0.043314498	1960	6.43E-93
tlx1	ENSDARG00000003965	0.564822472	-0.163207508	-0.000369169	7	0.742122183
larp6b	ENSDARG00000003968	NA	NA	NA	0	1
trim35-13	ENSDARG00000003970	0.548150026	-0.120988747	-0.000285811	5	0.742122183
isl2a	ENSDARG00000003971	0.105109922	1.252961157	0.002569465	116	0.262592251
chordc1a	ENSDARG00000003973	0.138171716	1.088570274	0.002232575	328	0.328999638
spoplb	ENSDARG00000003974	3.22E-05	3.995733607	0.008352539	282	0.000152084
zgc:153896	ENSDARG00000003977	0.52965387	-0.07439981	-0.000188332	3	0.742122183
LTN1	ENSDARG00000003984	0.76448647	-0.720808962	-0.001577896	254	0.805226738
crhr1	ENSDARG00000003989	0	48.05323858	0.101272423	975	0
fhl2b	ENSDARG00000003991	0.519834959	-0.04973937	-0.000139215	4	0.742122183
syt9a	ENSDARG00000003994	7.97E-25	10.22122043	0.021349277	85	7.45E-24
phyhipla	ENSDARG00000003998	0.01530229	2.162176437	0.00446018	75	0.048956738
adcyap1a	ENSDARG00000004015	NA	NA	NA	0	1
spag1a	ENSDARG00000004017	0.000537687	3.270026735	0.006831166	422	0.002210859
CHST13	ENSDARG00000004018	4.69E-99	21.09215195	0.044448008	1432	8.48E-98
isl1	ENSDARG00000004023	0.117229988	1.18894839	0.002411291	43	0.286621233
arhgdig	ENSDARG00000004034	0.081617645	1.394272641	0.002870254	164	0.212130502
cog2	ENSDARG00000004037	0.003970478	2.654570026	0.005492511	82	0.014328029
phf6	ENSDARG00000004046	0.220069591	0.771958204	0.001560311	144	0.477222936
marcksa	ENSDARG00000004049	1.55E-08	5.535198454	0.011598738	347	9.25E-08
CR354540.1	ENSDARG00000004051	0.538095324	-0.095636404	-0.000216553	5	0.742122183
uhrf1bp1l	ENSDARG00000004055	7.95E-67	17.2296701	0.036260407	487	1.18E-65
galk2	ENSDARG00000004059	0.537375753	-0.093824594	-0.000230984	5	0.742122183
bhlhe40	ENSDARG00000004060	0.700182962	-0.524926803	-0.001132632	22	0.76793845
bach2b	ENSDARG00000004074	0	38.70376176	0.081637814	4250	0
acsl4a	ENSDARG00000004078	0.579297346	-0.200096246	-0.00048119	170	0.742122183
cx39.9	ENSDARG00000004082	1.86E-22	9.678581851	0.018745711	10	1.67E-21
acsbg2	ENSDARG00000004094	7.04E-06	4.342513945	0.009099059	926	3.51E-05
tie1	ENSDARG00000004105	0.454742667	0.113687736	0.000171464	21	0.742122183
zgc:162154	ENSDARG00000004109	NA	NA	NA	0	1
esr1	ENSDARG00000004111	0.716398449	-0.572175474	-0.001234335	28	0.776631146
tti1	ENSDARG00000004114	0.631177583	-0.334973821	-0.000747705	37	0.742122183
mgat4b	ENSDARG00000004115	0	165.9569883	0.350271162	7316	0
mvk	ENSDARG00000004130	0.748526452	-0.669859912	-0.001441173	30	0.796746018
rttn	ENSDARG00000004131	5.05E-10	6.107939153	0.012818717	642	3.22E-09
usp19	ENSDARG00000004132	0.143740144	1.063665434	0.002182415	589	0.339778171
zgc:92630	ENSDARG00000004141	1.29E-05	4.207892532	0.008696551	45	6.30E-05
grm2a	ENSDARG00000004150	0.839557281	-0.992639971	-0.002125166	48	0.861129053
rab23	ENSDARG00000004151	9.00E-09	5.630189498	0.011759279	116	5.41E-08
orai1b	ENSDARG00000004154	0.627677607	-0.325708667	-0.000736683	46	0.742122183
tmem63c	ENSDARG00000004158	2.07E-07	5.062478467	0.010525382	76	1.16E-06
reep3b	ENSDARG00000004160	2.37E-08	5.460994196	0.011465083	2322	1.39E-07
ik	ENSDARG00000004161	0.615500855	-0.293685428	-0.000676049	104	0.742122183
zgc:110366	ENSDARG00000004167	0.19497245	0.859717291	0.001738508	76	0.432026246
stmn1a	ENSDARG00000004169	0.044053596	1.70546791	0.003527179	208	0.124117052
rabac1	ENSDARG00000004171	0.751567494	-0.679430685	-0.001488997	182	0.798139936
copa	ENSDARG00000004173	0.00058011	3.248483507	0.006788713	542	0.002377366
cnot1	ENSDARG00000004174	4.92E-06	4.420601129	0.009263578	820	2.49E-05
ulk4	ENSDARG00000004176	7.11E-28	10.88081088	0.022895163	1052	7.04E-27
fam169ab	ENSDARG00000004177	0.44146866	0.147246676	0.000231334	14	0.742122183
nf1b	ENSDARG00000004184	1.83E-100	21.24521599	0.044778551	2192	3.31E-99
zgc:122979	ENSDARG00000004187	NA	NA	NA	0	1
cbx1a	ENSDARG00000004189	3.00E-10	6.190186832	0.01298078	363	1.93E-09
tnfsf10l	ENSDARG00000004196	0	44.13635801	0.093043807	956	0
spam1	ENSDARG00000004199	0.939771595	-1.552859058	-8.23E-05	1	0.944294399
efhc2	ENSDARG00000004204	3.13E-13	7.194537225	0.014811317	38	2.25E-12
ccdc106a	ENSDARG00000004211	0.420324601	0.201063141	0.000360874	111	0.742122183
rnd1b	ENSDARG00000004218	8.43E-129	24.11630985	0.050800957	652	1.73E-127
slc6a3	ENSDARG00000004219	0.001771459	2.916227744	0.006013878	51	0.006749989
pde3a	ENSDARG00000004227	0.013195567	2.220407257	0.004614852	273	0.04281449
dlb	ENSDARG00000004232	0	55.0937536	0.116069376	460	0
asic4b	ENSDARG00000004243	0.244533308	0.691794142	0.001374741	40	0.516758008
slit2	ENSDARG00000004246	5.50E-83	19.26295996	0.040586115	1446	9.07E-82
dhfr	ENSDARG00000004251	4.59E-07	4.908458745	0.010249319	175	2.51E-06
wnt11f2	ENSDARG00000004256	3.52E-05	3.974897875	0.00830339	205	0.000165187
cul5b	ENSDARG00000004260	3.08E-16	8.086046516	0.016350249	18	2.40E-15
tmed9	ENSDARG00000004261	0.943585451	-1.58560431	-0.003399405	273	0.947831878
cyp46a1.2	ENSDARG00000004262	2.73E-05	4.034672091	0.008166648	19	0.000129813
atl3	ENSDARG00000004270	0.259692101	0.644294931	0.001297049	384	0.540769907
zgc:112496	ENSDARG00000004274	0.096476827	1.301890985	0.002578006	21	0.243896422
seh1l	ENSDARG00000004280	0.289098522	0.556020202	0.001110163	280	0.588840382
zgc:77375	ENSDARG00000004282	0.070000906	1.475784282	0.00302947	102	0.185242154
hecw1b	ENSDARG00000004291	5.54E-09	5.713405141	0.011895709	88	3.37E-08
ambp	ENSDARG00000004296	0.741765029	-0.648796467	-0.001391897	26	0.792775536
irf2bpl	ENSDARG00000004297	0.03026374	1.876931521	0.003895051	449	0.089471199
rhogb	ENSDARG00000004301	0.207317024	0.815765887	0.001597089	34	0.454397381
slc45a1	ENSDARG00000004302	0.488584393	0.028618589	-1.78E-06	23	0.742122183
vangl1	ENSDARG00000004305	0	39.35100721	0.082915142	519	0
klhl18	ENSDARG00000004306	0.308609626	0.499795254	0.00096866	30	0.614419104
lypd6	ENSDARG00000004307	2.06E-176	28.29373416	0.059622237	808	4.97E-175
fam8a1b	ENSDARG00000004308	0.249142754	0.67718985	0.001328803	27	0.523716292
ldlrap1a	ENSDARG00000004311	0.0780075	1.418602285	0.002923371	205	0.203714116
cbwd	ENSDARG00000004318	0.607326821	-0.272358527	-0.000630998	87	0.742122183
ush1ga	ENSDARG00000004322	0.006936541	2.460532987	0.004981707	24	0.023902172
casp9	ENSDARG00000004325	0.477762134	0.055770961	5.56E-05	52	0.742122183
LIN28A	ENSDARG00000004328	8.89E-31	11.47424696	0.024128084	458	9.20E-30
exoc4	ENSDARG00000004336	0.125713546	1.146889984	0.002359678	1616	0.303947627
nelfe	ENSDARG00000004343	0.091608649	1.330914036	0.00271177	50	0.233503755
gnb3a	ENSDARG00000004358	0.228797909	0.742811491	0.00145794	20	0.49198866
lhfpl6	ENSDARG00000004363	3.96E-136	24.8049929	0.052273792	1044	8.36E-135
fmnl3	ENSDARG00000004372	6.74E-33	11.88919303	0.025029558	1804	7.17E-32
ppp1r13ba	ENSDARG00000004377	5.24E-05	3.879098227	0.008101511	227	0.000241989
yrk	ENSDARG00000004378	0.780393334	-0.773522308	-0.001681739	111	0.816929902
si:dkey-153k10.9	ENSDARG00000004386	1.98E-12	6.938703011	0.014401128	51	1.38E-11
hdr	ENSDARG00000004392	0.018153015	2.093483329	0.004287924	39	0.057020244
b3gnt5b	ENSDARG00000004396	0.524155109	-0.060584921	-0.000162866	8	0.742122183
elovl6	ENSDARG00000004402	7.36E-06	4.332893499	0.009045078	165	3.67E-05
snx10a	ENSDARG00000004405	0.273165411	0.603267391	0.001202163	84	0.563659454
spra	ENSDARG00000004406	0.739341372	-0.641316216	-0.001393043	43	0.791211791
tcf7l2	ENSDARG00000004415	0	68.65288707	0.144853984	4080	0
dpy30	ENSDARG00000004427	0.617163507	-0.298039539	-0.000651081	14	0.742122183
btk	ENSDARG00000004433	0.003923028	2.65862366	0.005254507	14	0.014168647
fam92a1	ENSDARG00000004436	0.418021307	0.206958058	0.000371182	62	0.742122183
grm5a	ENSDARG00000004445	0.000188102	3.556237319	0.007226736	25	0.000814949
aplnr2	ENSDARG00000004447	0.568552503	-0.17269014	-0.000389497	7	0.742122183
tnfrsfa	ENSDARG00000004451	0	38.7544826	0.081747513	5910	0
tardbpl	ENSDARG00000004452	0.226818008	0.749367031	0.001519745	648	0.488733306
p2rx5	ENSDARG00000004455	0.742152159	-0.649994642	-0.00139805	33	0.792977489
unc119.2	ENSDARG00000004459	0.531595597	-0.079281393	-0.000196018	3	0.742122183
desi2	ENSDARG00000004460	0.637605946	-0.352066878	-0.000798992	120	0.742574594
prkcsh	ENSDARG00000004470	7.83E-07	4.802586655	0.010070137	880	4.22E-06
atat1	ENSDARG00000004472	0.006639269	2.476210208	0.005154908	321	0.022960324
tbx21	ENSDARG00000004473	0.571110515	-0.179202158	-0.000407822	9	0.742122183
pcyt1ab	ENSDARG00000004492	0.572863829	-0.183670004	-0.000414358	8	0.742122183
tspan33a	ENSDARG00000004497	0.108185327	1.236236536	0.002498213	39	0.26915869
xkr8.1	ENSDARG00000004498	NA	NA	NA	0	1
rcor3	ENSDARG00000004502	0.716206045	-0.571607503	-0.00123143	22	0.776484671
ppat	ENSDARG00000004517	0.196516378	0.854130373	0.0017187	62	0.434814738
C2H1orf35	ENSDARG00000004525	0.01407028	2.195321283	0.00454633	117	0.045379631
pin4	ENSDARG00000004527	0.000984381	3.094904512	0.006341687	36	0.003898379
zgc:173742	ENSDARG00000004529	0.383621959	0.295981883	0.0005521	40	0.724556133
kmt2a	ENSDARG00000004537	1.61E-13	7.285046406	0.015310261	1227	1.16E-12
ptgs2a	ENSDARG00000004539	5.58E-13	7.115451991	0.01479688	233	3.96E-12
prkcg	ENSDARG00000004561	5.85E-10	6.084390079	0.012592765	44	3.72E-09
gtf3c2	ENSDARG00000004574	0.000746493	3.176043559	0.006631256	381	0.003012498
plk4	ENSDARG00000004576	0.000329696	3.405929187	0.007094922	159	0.001390762
zgc:194665	ENSDARG00000004577	0.51652082	-0.041423398	-0.000120318	3	0.742122183
nmnat2	ENSDARG00000004580	0.564800491	-0.163151671	-0.000375245	8	0.742122183
sel1l	ENSDARG00000004581	0.202131073	0.834033431	0.001692673	158	0.444729583
ntrk1	ENSDARG00000004586	1.58E-20	9.213372128	0.018958872	30	1.37E-19
kat5a	ENSDARG00000004587	0.251606075	0.669444222	0.001343792	125	0.527710368
sox4a	ENSDARG00000004588	2.89E-24	10.09541834	0.021196077	251	2.68E-23
gpr22a	ENSDARG00000004592	1.13E-20	9.249110963	0.018798519	19	9.82E-20
znf800a	ENSDARG00000004594	0.304893065	0.510378767	0.000996922	46	0.608610842
lrrc4ba	ENSDARG00000004597	0.020962916	2.034255586	0.0041936	85	0.064754454
or102-2	ENSDARG00000004598	0.608578179	-0.275615188	-0.000605932	12	0.742122183
mtmr2	ENSDARG00000004616	0.768755973	-0.734756088	-0.001577651	33	0.808375488
stx2a	ENSDARG00000004618	0.631297121	-0.335290768	-0.000727939	14	0.742122183
gpm6ab	ENSDARG00000004621	1.83E-50	14.89314036	0.03129343	250	2.38E-49
panx3	ENSDARG00000004627	1.49E-10	6.299524578	0.013078767	51	9.72E-10
egln1b	ENSDARG00000004632	1.48E-14	7.599837104	0.015960379	578	1.10E-13
epn3b	ENSDARG00000004633	0.000398746	3.353663759	0.006383234	6	0.001663873
osbp	ENSDARG00000004634	0.412021108	0.222348993	0.000407793	311	0.742122183
epha7	ENSDARG00000004635	0	72.93521932	0.15390323	6652	0
ccdc9	ENSDARG00000004636	0.715281228	-0.568880051	-0.001256977	200	0.776164518
cdhr1a	ENSDARG00000004643	0.135032263	1.102913973	0.002171647	18	0.322830596
spice1	ENSDARG00000004647	0.03595956	1.799629755	0.003664497	40	0.104275521
kctd16a	ENSDARG00000004648	0.513443652	-0.03370462	-0.000102395	4	0.742122183
zgc:101810	ENSDARG00000004658	4.85E-14	7.444918319	0.015202868	38	3.55E-13
ptk2ab	ENSDARG00000004672	9.39E-58	15.97598113	0.033657941	2348	1.29E-56
dnajb6a	ENSDARG00000004680	0.050150956	1.643391725	0.00338713	121	0.139160705
acaa1	ENSDARG00000004687	0.568308748	-0.172069991	-0.000386763	6	0.742122183
nabp1a	ENSDARG00000004692	2.80E-05	4.028683852	0.008440594	1420	0.000133017
six4a	ENSDARG00000004695	2.93E-32	11.76575008	0.024733094	384	3.10E-31
eefsec	ENSDARG00000004696	0.664266381	-0.42413517	-0.000920132	17	0.752370304
rxrgb	ENSDARG00000004697	0.505590822	-0.014014572	-8.99E-05	88	0.742122183
irf2bp2a	ENSDARG00000004702	0.606796645	-0.270979616	-0.000602409	16	0.742122183
syf2	ENSDARG00000004706	0.025121459	1.957890034	0.004026587	66	0.076093216
tbr1b	ENSDARG00000004712	0.517949281	-0.045007367	-0.000138126	3	0.742122183
mad2l1	ENSDARG00000004713	0.059891737	1.555683069	0.003206576	154	0.162327736
tcf12	ENSDARG00000004714	6.92E-206	30.59601084	0.064518294	2948	1.82E-204
mpp5b	ENSDARG00000004721	0.693583414	-0.506033443	-0.0011057	39	0.766528653
tcea3	ENSDARG00000004724	0.067553247	1.49426452	0.003059371	65	0.179629101
trappc11	ENSDARG00000004726	0.808845367	-0.873649308	-0.001899475	244	0.835354216
hnrnpub	ENSDARG00000004735	2.32E-12	6.915975164	0.014530694	1062	1.62E-11
lmbr1l	ENSDARG00000004745	0.228409359	0.744095472	0.001500816	137	0.491316369
zgc:100868	ENSDARG00000004748	0.860264259	-1.081507375	-0.00231176	61	0.876168759
mylkb	ENSDARG00000004753	3.00E-34	12.14630135	0.025152134	42	3.26E-33
hspa4a	ENSDARG00000004754	1.67E-26	10.58937054	0.022283934	1285	1.61E-25
ybx1	ENSDARG00000004757	0.298002462	0.530154342	0.001058063	1257	0.603699221
hhla2a.2	ENSDARG00000004763	0.066965622	1.498777958	0.003057334	65	0.178290374
ankrd10b	ENSDARG00000004771	0.067090325	1.497817591	0.003097685	597	0.178567299
wdr36	ENSDARG00000004774	5.96E-10	6.081428069	0.012751908	381	3.79E-09
fgfr3	ENSDARG00000004782	3.26E-17	8.35552054	0.01756505	854	2.59E-16
cops2	ENSDARG00000004785	0.10377196	1.260347808	0.002568857	68	0.259826283
lrp1ba	ENSDARG00000004789	1.96E-24	10.1337726	0.021116413	72	1.82E-23
ccdc146	ENSDARG00000004794	0.5974581	-0.246773138	-0.000535706	8	0.742122183
mgrn1b	ENSDARG00000004796	0.843580291	-1.009281982	-0.002182987	174	0.864652266
grwd1	ENSDARG00000004806	1.13E-06	4.727990838	0.0098695	147	6.03E-06
asz1	ENSDARG00000004823	0.557744793	-0.145253896	-0.000335954	7	0.742122183
flot2a	ENSDARG00000004830	0.000832955	3.144113052	0.006571932	958	0.003340077
dnajc5ab	ENSDARG00000004836	0.069907625	1.476479367	0.003050105	350	0.185038666
rassf1	ENSDARG00000004840	0.095992021	1.304732231	0.002671459	92	0.242930839
foxp1a	ENSDARG00000004843	1.81E-05	4.129943242	0.008652765	1105	8.77E-05
hinfp	ENSDARG00000004851	0.85782459	-1.070596674	-0.002286994	46	0.874062189
esrrga	ENSDARG00000004861	3.79E-17	8.337570706	0.017500399	309	3.01E-16
foxr1	ENSDARG00000004864	NA	NA	NA	0	1
mindy1	ENSDARG00000004866	0.109313351	1.230188029	0.002527041	194	0.271443491
penka	ENSDARG00000004869	0.517431554	-0.043708339	-0.000128853	4	0.742122183
psen1	ENSDARG00000004870	0.006009972	2.511558251	0.00518871	77	0.02096325
mst1rb	ENSDARG00000004871	0.55796658	-0.145815752	-0.00032543	5	0.742122183
spata6l	ENSDARG00000004874	1.63E-10	6.285659939	0.012998058	49	1.06E-09
tmc6b	ENSDARG00000004875	0.184924568	0.89675599	0.001816567	91	0.416824839
rock2b	ENSDARG00000004877	4.18E-11	6.494099647	0.01362649	420	2.79E-10
acsm3	ENSDARG00000004880	0.893037419	-1.242844443	-0.002648947	49	0.903364778
aga	ENSDARG00000004889	0.072021296	1.460901074	0.002950463	34	0.18988807
pex19	ENSDARG00000004891	0.516330372	-0.040945611	-0.000145696	46	0.742122183
zp2l2	ENSDARG00000004898	NA	NA	NA	0	1
gys2	ENSDARG00000004904	0.669665093	-0.438988575	-0.000965804	30	0.754984263
stip1	ENSDARG00000004906	0.00085753	3.135594914	0.006549669	487	0.003431179
immp2l	ENSDARG00000004925	5.81E-07	4.862135284	0.010200304	1832	3.15E-06
lmo7a	ENSDARG00000004930	2.98E-22	9.630184859	0.020219928	367	2.66E-21
slc8a3	ENSDARG00000004931	3.94E-05	3.947881527	0.00821722	98	0.000184182
anos1b	ENSDARG00000004932	5.39E-268	34.95524496	0.073694137	1419	1.64E-266
skp2	ENSDARG00000004937	2.81E-05	4.028178243	0.008353653	73	0.000133279
mtdhb	ENSDARG00000004939	0.789277266	-0.803916037	-0.001749536	136	0.823433273
bccip	ENSDARG00000004948	0.65741411	-0.405415962	-0.000910391	103	0.749395357
rsad2	ENSDARG00000004952	NA	NA	NA	0	1
mxb	ENSDARG00000004953	0.532657862	-0.081952764	-0.000207549	6	0.742122183
grna	ENSDARG00000004954	0.772292862	-0.746419116	-0.001601883	30	0.810941958
zmat2	ENSDARG00000004956	0.170975737	0.950316469	0.001914423	44	0.391103788
cyp4t8	ENSDARG00000004964	4.33E-31	11.53628476	0.024174234	133	4.50E-30
elovl5	ENSDARG00000004979	0.007812834	2.417543465	0.005008213	95	0.026673245
ppp3ca	ENSDARG00000004988	1.61E-223	31.89410159	0.067126916	314	4.42E-222
brf1b	ENSDARG00000005002	3.29E-12	6.866656202	0.014428051	1240	2.28E-11
slc5a12	ENSDARG00000005004	1.12E-08	5.592960096	0.011729663	482	6.69E-08
si:dkeyp-2e4.8	ENSDARG00000005010	0.511003873	-0.027586117	-9.91E-05	2	0.742122183
tspy	ENSDARG00000005015	0.106230085	1.246829095	0.002518089	40	0.264954918
fkbp9	ENSDARG00000005023	1.27E-18	8.73041262	0.018309834	226	1.05E-17
tshz1	ENSDARG00000005026	2.41E-199	30.1002317	0.06346466	1971	6.18E-198
crppa	ENSDARG00000005034	0.066171229	1.504928506	0.00311323	649	0.176611222
rab20	ENSDARG00000005049	0.654510378	-0.397526507	-0.000864559	22	0.748461425
wnt2ba	ENSDARG00000005050	0.512355899	-0.030976599	-0.00010609	2	0.742122183
dimt1l	ENSDARG00000005057	0.763639339	-0.718058331	-0.001539188	35	0.804596312
ncapd2	ENSDARG00000005058	6.67E-07	4.834710043	0.010117921	286	3.60E-06
eif4e3	ENSDARG00000005078	0.667980793	-0.434344333	-0.00097447	226	0.754498045
ggctb	ENSDARG00000005085	0.580659161	-0.203580059	-0.00046023	8	0.742122183
cep89	ENSDARG00000005092	0.032411018	1.846483475	0.003832897	587	0.095113463
glcea	ENSDARG00000005095	NA	NA	NA	0	1
zgc:86764	ENSDARG00000005098	0.433831124	0.166628652	0.000287642	74	0.742122183
limk2	ENSDARG00000005104	0.004006937	2.6514847	0.005530628	666	0.014443494
oclna	ENSDARG00000005108	5.67E-36	12.46669024	0.026235113	938	6.31E-35
cdh17	ENSDARG00000005112	0.471624185	0.0711877	8.73E-05	41	0.742122183
calub	ENSDARG00000005115	0.110164526	1.225653618	0.00251694	185	0.273007264
atp2a2b	ENSDARG00000005122	4.13E-31	11.54027177	0.024295858	2223	4.30E-30
large1	ENSDARG00000005126	0.005563448	2.538688143	0.005289283	411	0.019543323
rnaseh2b	ENSDARG00000005128	0.333388157	0.430576524	0.000835401	62	0.653599316
psmd11b	ENSDARG00000005134	0.001776466	2.915347033	0.006081934	358	0.006766146
hhatlb	ENSDARG00000005139	0.843280964	-1.008034144	-0.002163555	65	0.864379681
camkvb	ENSDARG00000005141	0.672381031	-0.446497471	-0.000968349	19	0.756121557
tbx20	ENSDARG00000005150	0.571740146	-0.180806186	-0.000404866	6	0.742122183
aspa	ENSDARG00000005154	0.211092532	0.802636155	0.001587496	31	0.461077092
cyth1a	ENSDARG00000005159	0.043839657	1.707768454	0.003528686	151	0.123635378
tpm3	ENSDARG00000005162	3.81E-69	17.53599056	0.036954097	3741	5.73E-68
efr3a	ENSDARG00000005163	3.99E-13	7.16143909	0.015048281	1013	2.85E-12
dynll2b	ENSDARG00000005172	0.002559826	2.79940723	0.005836935	335	0.009529694
zgc:101040	ENSDARG00000005176	NA	NA	NA	0	1
dglucy	ENSDARG00000005179	0.11070694	1.222777144	0.002476172	36	0.274089128
cpn1	ENSDARG00000005185	5.26E-06	4.406282411	0.00888268	16	2.65E-05
sp4	ENSDARG00000005186	0.109146342	1.231080697	0.002534453	486	0.271184828
ahcy	ENSDARG00000005191	0.000171478	3.580485906	0.007487436	500	0.000746705
coro2a	ENSDARG00000005210	2.01E-116	22.90635612	0.048164922	252	3.91E-115
zgc:158328	ENSDARG00000005216	0.165605174	0.971678836	0.00195479	44	0.380634636
wrnip1	ENSDARG00000005218	0.655392467	-0.399920508	-0.000870606	17	0.748606924
pdcd6	ENSDARG00000005220	1.27E-05	4.210877919	0.008814515	446	6.22E-05
desmb	ENSDARG00000005221	0.602252483	-0.25918172	-0.000576623	12	0.742122183
ssr2	ENSDARG00000005230	0.054429641	1.603341485	0.003315412	260	0.149527031
ccdc85ca	ENSDARG00000005232	8.69E-38	12.79544182	0.026939418	1284	9.88E-37
srcap	ENSDARG00000005236	2.63E-05	4.043603399	0.008469802	977	0.000125216
asb3	ENSDARG00000005246	0.839023976	-0.990454441	-0.002118068	50	0.860705336
rpe	ENSDARG00000005251	0.356300898	0.368364054	0.000699687	31	0.688715406
kdelr2a	ENSDARG00000005254	0.001073716	3.069046511	0.006410897	573	0.004228879
zc3h12a	ENSDARG00000005271	0.335433066	0.424959592	0.000820688	44	0.656564329
rad52	ENSDARG00000005274	0.602856092	-0.260746744	-0.000607802	129	0.742122183
fbxl15	ENSDARG00000005284	0.526884405	-0.067440298	-0.000171625	3	0.742122183
CALHM1	ENSDARG00000005314	NA	NA	NA	0	1
celf1	ENSDARG00000005315	1.90E-05	4.119445259	0.008629857	967	9.16E-05
stam2	ENSDARG00000005318	0.248000975	0.680793838	0.001368082	123	0.521967261
nipsnap1	ENSDARG00000005320	0.04849257	1.659648729	0.003259017	12	0.135138264
ftr66	ENSDARG00000005327	0.083744199	1.380319163	-4.12E-05	1	0.216095754
lipib	ENSDARG00000005332	0.664137122	-0.423780698	-0.000918381	16	0.75225843
slc22a4	ENSDARG00000005335	NA	NA	NA	0	1
ccdc85al	ENSDARG00000005343	1.87E-06	4.625406325	0.009672543	207	9.79E-06
dip2ba	ENSDARG00000005350	0.003821435	2.667452481	0.005567777	1331	0.013836469
larp6a	ENSDARG00000005355	2.30E-30	11.39174772	0.023893498	191	2.36E-29
tyro3	ENSDARG00000005356	3.06E-09	5.813709403	0.012187112	338	1.88E-08
sucla2	ENSDARG00000005359	0.002761431	2.774841478	0.005779169	225	0.010243406
grin3ba	ENSDARG00000005364	0.000847766	3.138952122	0.006465688	47	0.003395784
mcamb	ENSDARG00000005368	1.33E-61	16.51951769	0.034728399	264	1.89E-60
gprc6a	ENSDARG00000005371	0.103370856	1.262575681	0.002495917	19	0.258947195
camk4	ENSDARG00000005372	0.077587414	1.421488387	0.002900823	56	0.202713755
tubgcp4	ENSDARG00000005374	0.258478587	0.648042945	0.001303023	227	0.538634011
prdm9	ENSDARG00000005382	0.624771437	-0.318036665	-0.000721813	47	0.742122183
slc5a5	ENSDARG00000005392	0.560386424	-0.15194901	-0.000351548	6	0.742122183
dnmt3aa	ENSDARG00000005394	0.229218596	0.741422688	0.001501086	304	0.492688684
trim3b	ENSDARG00000005397	8.87E-17	8.236487188	0.017319987	1458	7.00E-16
grapa	ENSDARG00000005414	0.599453344	-0.251932404	-0.000564447	11	0.742122183
map3k5	ENSDARG00000005416	3.34E-13	7.185968075	0.015085434	433	2.39E-12
pgam1a	ENSDARG00000005423	0.013208934	2.220013246	0.004580515	67	0.04285249
wdfy1	ENSDARG00000005425	6.54E-05	3.824924567	0.00800459	569	0.00029894
mtfmt	ENSDARG00000005448	0.216944786	0.782553132	0.001573589	70	0.471473427
gdi2	ENSDARG00000005451	0.345457851	0.397612693	0.000778042	731	0.671818738
foxp2	ENSDARG00000005453	3.51E-28	10.9449524	0.023033005	1248	3.49E-27
tacc3	ENSDARG00000005454	0.009777877	2.334763983	0.004851293	211	0.0327176
katnb1	ENSDARG00000005456	0.005902622	2.517913136	0.005240045	280	0.020630491
csnk1g2a	ENSDARG00000005458	0.243752324	0.694283163	0.001402908	462	0.516758008
kif4	ENSDARG00000005462	2.95E-17	8.367242001	0.017576306	479	2.35E-16
slc30a1a	ENSDARG00000005463	0.789343782	-0.804146388	-0.00175312	244	0.823445558
dnase1l1	ENSDARG00000005464	0.181321373	0.910340919	0.001843813	80	0.410274664
irf2bp1	ENSDARG00000005468	0.706084638	-0.541982263	-0.001198793	141	0.770883865
nav3	ENSDARG00000005476	1.83E-210	30.93828327	0.065222176	1360	4.83E-209
tenm3	ENSDARG00000005479	0	47.78813477	0.100810771	3647	0
nfkbiaa	ENSDARG00000005481	6.84E-10	6.059203325	0.012654361	143	4.34E-09
rapgef2	ENSDARG00000005482	1.68E-120	23.31180045	0.049146034	3630	3.35E-119
ucmab	ENSDARG00000005485	5.09E-91	20.19807358	0.042160016	73	8.81E-90
dgcr6	ENSDARG00000005500	0.120270527	1.173635502	0.002357996	32	0.292783423
gdf6b	ENSDARG00000005510	0.562501825	-0.157315316	-0.000354253	7	0.742122183
naca	ENSDARG00000005513	0.011567345	2.271203018	0.004725382	423	0.038162807
slc5a9	ENSDARG00000005518	0.697370406	-0.516852413	-0.001117143	20	0.766528653
galr1a	ENSDARG00000005522	NA	NA	NA	0	1
acy3.2	ENSDARG00000005525	0.009765324	2.33524458	0.004773352	35	0.032679819
igfn1.1	ENSDARG00000005526	0.002138317	2.857001809	0.005949619	185	0.008050793
ubr7	ENSDARG00000005536	0.017735092	2.10294951	0.004328179	66	0.055829422
xpo7	ENSDARG00000005540	0.000276084	3.454082733	0.007211241	277	0.001176299
wif1	ENSDARG00000005541	5.03E-33	11.91358263	0.025012411	213	5.37E-32
btbd3a	ENSDARG00000005544	0.529240387	-0.07336053	-0.000213006	47	0.742122183
rint1	ENSDARG00000005547	0.684232979	-0.479568793	-0.001042452	21	0.762214873
znf710b	ENSDARG00000005549	0.123636055	1.157000613	0.002371814	167	0.29962418
hnrnph1l	ENSDARG00000005551	0.000832714	3.144197867	0.006564767	398	0.003339627
pou4f1	ENSDARG00000005559	2.38E-184	28.93170438	0.060559104	81	5.90E-183
ywhah	ENSDARG00000005560	0.416629731	0.210523052	0.000382145	193	0.742122183
gfm2	ENSDARG00000005561	0.001218712	3.031003601	0.006317089	209	0.004766599
entpd8	ENSDARG00000005565	0.526891777	-0.067458817	-0.00017164	3	0.742122183
vsx2	ENSDARG00000005574	0.610440348	-0.280466916	-0.000633719	28	0.742122183
mphosph8	ENSDARG00000005576	3.46E-05	3.979328266	0.008330324	622	0.000162289
ugp2a	ENSDARG00000005578	0.355428003	0.370706692	0.00070502	29	0.687359151
zbtb20	ENSDARG00000005586	3.33E-36	12.50903303	0.026329467	1000	3.72E-35
mtf2	ENSDARG00000005590	1.59E-06	4.658844548	0.009752322	325	8.37E-06
rxrga	ENSDARG00000005593	0.001466276	2.97472083	0.006197462	218	0.005666393
adgb	ENSDARG00000005595	1.88E-93	20.47282177	0.043025922	216	3.30E-92
paxip1	ENSDARG00000005606	3.63E-06	4.486146528	0.009390093	347	1.85E-05
aph1b	ENSDARG00000005612	0.388708589	0.282686484	0.000534203	205	0.732012713
bfb	ENSDARG00000005616	0.245046919	0.690159582	-5.09E-05	1	0.516758008
nek2	ENSDARG00000005619	0.137119905	1.093350794	0.002228189	86	0.32685588
maco1a	ENSDARG00000005625	0.436171456	0.160683214	0.00027719	171	0.742122183
si:ch211-133l11.10	ENSDARG00000005626	0.001469146	2.974120894	0.006137961	53	0.005676636
zmp:0000000527	ENSDARG00000005627	NA	NA	NA	0	1
smyd2b	ENSDARG00000005629	0.889891881	-1.225953333	-0.002621041	61	0.900499496
adat3	ENSDARG00000005640	0.574139774	-0.186923707	-0.000423064	8	0.742122183
gcat	ENSDARG00000005643	0.399078765	0.255732328	0.000473054	68	0.742122183
robo3	ENSDARG00000005645	0	57.97689651	0.122319359	4211	0
olfml2a	ENSDARG00000005648	0.545823322	-0.115115776	-0.000297533	26	0.742122183
hrasb	ENSDARG00000005651	0.125732118	1.146800129	0.002330449	75	0.303964145
man1a1	ENSDARG00000005652	0	49.08698723	0.103551682	3544	0
ttbk2a	ENSDARG00000005670	0.216203239	0.785080319	0.001575276	57	0.470256575
f3b	ENSDARG00000005673	2.25E-143	25.46764021	0.053672893	1161	4.87E-142
sec61a1l	ENSDARG00000005675	0.454367378	0.114634598	0.000180316	153	0.742122183
trip10a	ENSDARG00000005679	1.98E-06	4.613935585	0.009655262	362	1.03E-05
slc25a23a	ENSDARG00000005690	0.000144636	3.624723251	0.007569079	257	0.000636131
ddx19	ENSDARG00000005699	0.154472775	1.017437079	0.00207083	92	0.358677168
eps8l3b	ENSDARG00000005704	0.602292541	-0.259285563	-0.000574954	11	0.742122183
ethe1	ENSDARG00000005713	3.76E-09	5.779018567	0.012026177	68	2.30E-08
olfml2ba	ENSDARG00000005716	0.004021405	2.650267323	0.005445	41	0.014489594
rpf1	ENSDARG00000005738	0.000295093	3.436084876	0.007172003	256	0.001251933
gpm6ba	ENSDARG00000005739	0.000100972	3.716572017	0.007769049	348	0.000450831
cand2	ENSDARG00000005749	0.566678964	-0.167925268	-0.000383125	8	0.742122183
ptprfb	ENSDARG00000005754	0	51.09361211	0.107797816	11115	0
col14a1a	ENSDARG00000005762	0	118.2664863	0.249574272	4341	0
tsr2	ENSDARG00000005772	0.433245737	0.168116697	0.000290205	70	0.742122183
ddx3xb	ENSDARG00000005774	1.11E-07	5.180460399	0.010863566	602	6.27E-07
scn8aa	ENSDARG00000005775	0	44.43194069	0.093560923	333	0
guk1b	ENSDARG00000005776	NA	NA	NA	0	1
npy8br	ENSDARG00000005780	NA	NA	NA	0	1
ncanb	ENSDARG00000005783	0	124.4523137	0.262408284	618	0
ppm1f	ENSDARG00000005786	0.135402797	1.101209258	0.002252	143	0.323596937
enpp1	ENSDARG00000005789	2.67E-27	10.75964601	0.022650011	2883	2.61E-26
rpl28	ENSDARG00000005791	0.787735537	-0.798588727	-0.00174115	224	0.82224901
smim14	ENSDARG00000005799	8.83E-05	3.750435883	0.007398978	13	0.000396758
ampd3a	ENSDARG00000005800	0.000902186	3.120674847	0.006388541	34	0.003595412
klhl10a	ENSDARG00000005814	0.520937092	-0.052505622	-0.000149389	3	0.742122183
ncf2	ENSDARG00000005821	0.640133133	-0.358814674	-0.00077499	15	0.74361017
slc39a10	ENSDARG00000005823	0.056676585	1.583299707	0.003269766	201	0.15473114
eif2s1a	ENSDARG00000005827	0.916029385	-1.378849279	-0.002961347	189	0.923604112
faima	ENSDARG00000005828	0.568452763	-0.17243638	-0.000394809	10	0.742122183
gatad2b	ENSDARG00000005834	0.186766021	0.889876802	0.001816174	667	0.420097803
got2b	ENSDARG00000005840	0.00759455	2.427838633	0.005037003	132	0.025979401
tnni2a.2	ENSDARG00000005841	0.584211114	-0.212678456	-0.000498939	27	0.742122183
cd9a	ENSDARG00000005842	0.740328593	-0.644358771	-0.001385438	29	0.79186136
FO704755.1	ENSDARG00000005846	0.000106143	3.703929647	0.007536963	27	0.000472938
slc25a6	ENSDARG00000005853	0.113566089	1.207779268	-4.36E-05	1	0.279059806
ralgapa2	ENSDARG00000005861	2.64E-54	15.47303057	0.032600361	3999	3.54E-53
or131-1	ENSDARG00000005865	0.51945329	-0.048781506	-0.000132975	2	0.742122183
gon4l	ENSDARG00000005867	5.06E-05	3.887585267	0.008117	212	0.000234144
mmadhc	ENSDARG00000005870	0.778547871	-0.767298168	-0.001650815	36	0.815525588
rfx1a	ENSDARG00000005883	4.08E-05	3.939707562	0.008248908	734	0.000190331
cyb5r3	ENSDARG00000005891	0.696340673	-0.513904652	-0.001120702	39	0.766528653
slc7a9	ENSDARG00000005894	1.20E-08	5.580949001	0.01169766	320	7.15E-08
dera	ENSDARG00000005897	0.583065344	-0.209741656	-0.000472798	10	0.742122183
clk4b	ENSDARG00000005908	0.017107997	2.117516991	0.004393897	213	0.054065699
tgm1l3	ENSDARG00000005913	0.564026756	-0.161186533	-0.000368661	7	0.742122183
tcf3a	ENSDARG00000005915	1.38E-14	7.608753417	0.015996809	1837	1.03E-13
srpk3	ENSDARG00000005916	0.474031204	0.065140158	7.63E-05	153	0.742122183
serpina10a	ENSDARG00000005924	0.110338142	1.224731811	0.002432136	19	0.273306723
ak2	ENSDARG00000005926	0.083628011	1.381074611	0.002841984	166	0.216095754
tbc1d17	ENSDARG00000005927	0.14163831	1.072987731	0.002194558	162	0.335556696
clul1	ENSDARG00000005941	5.32E-18	8.566762176	0.018010291	869	4.32E-17
vmn2r1	ENSDARG00000005942	0.731499354	-0.617353945	-0.001332291	29	0.786380788
htra4	ENSDARG00000005943	0.475947182	0.060328048	5.68E-05	14	0.742122183
sart1	ENSDARG00000005945	0.249029521	0.67754687	0.001365927	280	0.523578755
ankmy2a	ENSDARG00000005948	0.666402191	-0.430000032	-0.000952008	47	0.753833087
ric8b	ENSDARG00000005972	0.528643583	-0.071860616	-0.00021141	139	0.742122183
sfswap	ENSDARG00000005980	4.61E-05	3.910345164	0.008193345	3619	0.000214173
rgl1	ENSDARG00000005989	9.04E-15	7.663575617	0.016085221	381	6.74E-14
prc1b	ENSDARG00000005993	0.031721221	1.856077996	0.003822724	79	0.093321878
mycla	ENSDARG00000006003	0.00072789	3.18335696	0.006613322	123	0.00294477
dct	ENSDARG00000006008	0.747680369	-0.667208031	-0.00143382	26	0.796290156
bmi1a	ENSDARG00000006010	0.792566342	-0.815358179	-0.001745732	33	0.825834685
klhl42	ENSDARG00000006011	0.577154427	-0.194619105	-0.000438062	7	0.742122183
tktb	ENSDARG00000006019	0.452717843	0.118797631	0.000189248	190	0.742122183
tp53i11b	ENSDARG00000006025	1.67E-30	11.41936284	0.024032924	1156	1.72E-29
lta4h	ENSDARG00000006029	0.214572626	0.790655154	0.001593271	81	0.46745599
abat	ENSDARG00000006031	1.77E-05	4.13526535	0.008658451	561	8.58E-05
aebp2	ENSDARG00000006038	3.63E-07	4.954326398	0.010384378	543	2.00E-06
cyp20a1	ENSDARG00000006040	0.646340647	-0.375459575	-0.000847366	104	0.745463456
usta	ENSDARG00000006044	1.57E-12	6.971015265	0.014644712	901	1.10E-11
malt2	ENSDARG00000006052	0.597775589	-0.247593653	-0.000550419	14	0.742122183
crybg1b	ENSDARG00000006060	0	39.70881061	0.083740523	1869	0
akap1b	ENSDARG00000006062	0.075158991	1.438409206	0.002965269	212	0.197045018
znf385b	ENSDARG00000006065	0	99.7983532	0.210550951	1856	0
uck2a	ENSDARG00000006074	0.371469034	0.327965076	0.000628709	159	0.705654896
gpr37l1a	ENSDARG00000006079	0.544368175	-0.111444781	-0.000254851	5	0.742122183
rad21a	ENSDARG00000006092	0.000157566	3.602532756	0.0075344	541	0.000689953
cdk15	ENSDARG00000006093	0.629209456	-0.329760298	-0.00071455	15	0.742122183
igf2r	ENSDARG00000006094	0.147434589	1.047499682	0.002147119	418	0.347034217
pimr185	ENSDARG00000006109	0.19415136	0.862699477	-4.84E-05	1	0.430575333
chrd	ENSDARG00000006110	0.748353351	-0.669316979	-0.001437684	27	0.796626718
myof	ENSDARG00000006112	4.57E-19	8.845223903	0.018348186	84	3.83E-18
tbx2b	ENSDARG00000006120	1.33E-78	18.73296037	0.039458208	837	2.14E-77
kdm5c	ENSDARG00000006124	0.000348408	3.390828497	0.007095139	1663	0.00146516
csnk1db	ENSDARG00000006125	0.659783747	-0.411873007	-0.000928555	392	0.750482711
cep170aa	ENSDARG00000006128	6.38E-07	4.843400393	0.010151904	630	3.45E-06
star	ENSDARG00000006137	0.60830781	-0.274911308	-0.000604323	10	0.742122183
pde11al	ENSDARG00000006151	0.654885702	-0.398544861	-0.000867627	18	0.7485234
lrrk2	ENSDARG00000006169	0.250726079	0.672206635	0.001352674	173	0.526291012
lrrc23	ENSDARG00000006174	0.037912205	1.775445175	0.003560272	19	0.109324292
hif1aa	ENSDARG00000006181	1.41E-24	10.16547145	0.021094786	48	1.32E-23
gatad2ab	ENSDARG00000006192	6.39E-15	7.708007439	0.016208881	3127	4.80E-14
sav1	ENSDARG00000006196	0.815815837	-0.899533939	-0.001943559	82	0.84082094
eif4g1a	ENSDARG00000006200	2.19E-62	16.62787706	0.035035549	2891	3.15E-61
erbb3a	ENSDARG00000006202	2.08E-05	4.098239443	0.008547293	217	1.00E-04
pou4f3	ENSDARG00000006206	4.54E-91	20.2037504	0.027067144	3	7.86E-90
gpx1b	ENSDARG00000006207	9.84E-53	15.23833592	0.03193159	119	1.30E-51
akr1b1.1	ENSDARG00000006215	0.613178236	-0.287612302	-0.000626917	12	0.742122183
gnl3	ENSDARG00000006219	0.000928257	3.112275058	0.006476624	159	0.003692493
ugt1a1	ENSDARG00000006220	0.709874897	-0.553019282	-0.001193446	22	0.773181929
ddx39aa	ENSDARG00000006225	0.245831967	0.687664731	0.001381408	103	0.518160314
brms1la	ENSDARG00000006235	0.364236714	0.347156927	0.000668523	145	0.696208115
slc27a1a	ENSDARG00000006240	0.527222223	-0.068289034	-0.000204383	342	0.742122183
ptp4a1	ENSDARG00000006242	0.031829125	1.85456584	0.003847179	361	0.093607418
ell2	ENSDARG00000006251	2.16E-06	4.595425114	0.009623087	358	1.12E-05
mier3a	ENSDARG00000006253	0.656124222	-0.401908242	-0.000907181	312	0.748780379
vldlr	ENSDARG00000006257	0.221645607	0.76664735	0.001553971	288	0.479761497
tuba8l4	ENSDARG00000006260	5.49E-07	4.873088842	0.010217857	773	2.99E-06
stat1a	ENSDARG00000006266	1.28E-43	13.79978638	0.029048931	832	1.56E-42
mpp5a	ENSDARG00000006272	3.17E-49	14.70114034	0.030966752	2191	4.08E-48
rragd	ENSDARG00000006279	1.38E-06	4.688303136	0.009811535	262	7.28E-06
waslb	ENSDARG00000006283	0.198133568	0.848306794	0.001725969	295	0.437719653
prdm5	ENSDARG00000006288	1.59E-89	20.02724145	0.042188418	895	2.72E-88
ndufs5	ENSDARG00000006290	0.31768828	0.474172979	0.000924778	52	0.628867351
maats1	ENSDARG00000006292	5.92E-299	36.93684381	0.077619455	169	1.93E-297
arhgef7a	ENSDARG00000006299	8.25E-08	5.235062429	0.010954842	223	4.71E-07
psmd9	ENSDARG00000006300	5.80E-11	6.444559406	0.013451991	94	3.84E-10
wu:fj59g11	ENSDARG00000006301	0	94.14319672	0.198661428	4113	0
shisa4	ENSDARG00000006307	0.777172879	-0.762680031	-0.001654147	72	0.814579613
ptpn18	ENSDARG00000006308	0.102835444	1.265559348	0.002575024	53	0.257830475
itgav	ENSDARG00000006314	3.16E-22	9.624148304	0.020241304	924	2.82E-21
rpl23a	ENSDARG00000006316	0.018618763	2.083150304	0.004327979	338	0.05832047
snx14	ENSDARG00000006332	0.012243351	2.249405618	0.004674068	229	0.040157694
tas1r3	ENSDARG00000006341	0.697638178	-0.517619686	-6.78E-05	1	0.766528653
med17	ENSDARG00000006345	0.655673529	-0.400683797	-0.000869951	20	0.748659947
nkx1.2la	ENSDARG00000006350	0.517750207	-0.044507861	-0.000126931	2	0.742122183
itga5	ENSDARG00000006353	0	70.60022443	0.148948032	2288	0
slc18a3a	ENSDARG00000006356	NA	NA	NA	0	1
crlf1b	ENSDARG00000006368	2.74E-18	8.643008569	0.017482316	21	2.24E-17
atp6v1h	ENSDARG00000006370	0.000132618	3.647080968	0.007622645	316	0.000585265
ugt5c2	ENSDARG00000006372	0.536288569	-0.091087755	-0.000214048	4	0.742122183
stxbp5l	ENSDARG00000006383	0	82.26351187	0.173352903	445	0
triobpb	ENSDARG00000006385	4.38E-72	17.91656379	0.03753217	108	6.72E-71
smad2	ENSDARG00000006389	2.10E-17	8.407327592	0.017681825	1782	1.68E-16
exosc9	ENSDARG00000006392	0.653312504	-0.394279101	-0.000857477	18	0.748172858
rbm25b	ENSDARG00000006395	6.45E-06	4.361726903	0.009138816	731	3.23E-05
nrcama	ENSDARG00000006396	1.66E-23	9.922812878	0.020744195	112	1.51E-22
laptm4a	ENSDARG00000006397	0.034137044	1.823193504	0.003779178	285	0.099566235
ywhae1	ENSDARG00000006399	0.693918741	-0.506989026	-0.001128664	355	0.766528653
hmgb3b	ENSDARG00000006408	0.022414517	2.006255136	0.004148079	120	0.068804197
mapk12b	ENSDARG00000006409	0.000812787	3.151278474	0.006224433	13	0.003262742
rpl38	ENSDARG00000006413	0.012148727	2.252392913	0.004679792	244	0.039897873
atrnl1b	ENSDARG00000006420	9.75E-07	4.758439861	0.009982554	2471	5.21E-06
esyt3	ENSDARG00000006422	0.010682255	2.301480068	0.004744011	122	0.035455064
fabp2	ENSDARG00000006427	0.567907611	-0.171049584	-0.000388579	9	0.742122183
polr1e	ENSDARG00000006434	0.116472749	1.192805649	0.002431827	83	0.285146786
slc19a3a	ENSDARG00000006447	0.662747708	-0.419973813	-0.000915911	20	0.751926375
pdgfrl	ENSDARG00000006456	0.703655694	-0.534943956	-0.001157861	22	0.769678223
pcdh8	ENSDARG00000006467	0.605529968	-0.26768725	-0.000590229	12	0.742122183
grap2a	ENSDARG00000006468	0.000592776	3.242333581	0.006687076	49	0.002426969
saxo2	ENSDARG00000006474	5.25E-05	3.87880502	0.00779006	14	0.000242238
ddi2	ENSDARG00000006477	0.664676615	-0.425260519	-0.000952762	112	0.752601753
anp32a	ENSDARG00000006487	9.39E-07	4.766166965	0.009986792	521	5.02E-06
agpat9l	ENSDARG00000006491	9.44E-06	4.277720528	0.008831849	50	4.66E-05
asb7	ENSDARG00000006494	0.209599895	0.807810308	0.001641483	363	0.458474316
rtn1a	ENSDARG00000006497	7.58E-19	8.788543652	0.018458484	347	6.32E-18
cyp2x10.2	ENSDARG00000006501	NA	NA	NA	0	1
pip5k1bb	ENSDARG00000006508	0	39.01919678	0.082268466	1095	0
her6	ENSDARG00000006514	2.66E-22	9.641902146	0.020287136	1736	2.38E-21
otop2	ENSDARG00000006522	0.550835634	-0.127772856	-0.000289691	7	0.742122183
supt6h	ENSDARG00000006524	0.007805954	2.417864069	0.005036598	490	0.026656787
fn1b	ENSDARG00000006526	7.55E-26	10.44710991	0.021924761	242	7.22E-25
brd3a	ENSDARG00000006527	3.43E-05	3.980765779	0.008329438	444	0.000161399
c1qtnf6b	ENSDARG00000006544	0.0422278	1.725398954	-3.63E-05	1	0.119663149
rgp1	ENSDARG00000006545	0.455966942	0.110599575	0.000171884	165	0.742122183
ak4	ENSDARG00000006546	0.033592997	1.830427803	0.003727787	42	0.098170414
rras	ENSDARG00000006553	0.684634535	-0.480698312	-0.001069066	126	0.762465369
irf4a	ENSDARG00000006560	0.636971952	-0.350376586	-0.000764703	15	0.742376222
nlk1	ENSDARG00000006566	0.227568917	0.746876961	0.001514067	536	0.489834101
dus4l	ENSDARG00000006567	0.525038601	-0.062803726	-0.00016526	4	0.742122183
kcnmb2	ENSDARG00000006568	0.536094915	-0.090600331	-0.000223535	5	0.742122183
nadka	ENSDARG00000006577	0.453736683	0.116226083	0.000180949	52	0.742122183
cldnd	ENSDARG00000006580	NA	NA	NA	0	1
phf8	ENSDARG00000006584	0.088602853	1.349408767	0.002778268	208	0.226936896
DMWD	ENSDARG00000006585	0.077781391	1.420154241	0.002892898	51	0.203200058
zgc:111983	ENSDARG00000006588	0.844657418	-1.0137854	-0.002166701	46	0.865584971
sgk2b	ENSDARG00000006598	0.524682385	-0.061909088	-0.000166261	3	0.742122183
lsm14aa	ENSDARG00000006600	0.014618807	2.180267838	0.004534025	385	0.046961557
kaznb	ENSDARG00000006601	0	38.12898777	0.080418585	3181	0
chrna2a	ENSDARG00000006602	0.000477893	3.303227871	0.006535154	16	0.001976932
csrp1a	ENSDARG00000006603	0.73032887	-0.613807926	-0.001341375	78	0.785579125
nectin3b	ENSDARG00000006604	2.59E-18	8.649548528	0.018193458	1787	2.12E-17
gpr27	ENSDARG00000006607	0.504341652	-0.010883122	-7.75E-05	3	0.742122183
map2k2a	ENSDARG00000006609	0.165254854	0.973087716	0.001985664	202	0.380067959
hnf1ba	ENSDARG00000006615	0.535767984	-0.089777496	-0.000214592	3	0.742122183
napga	ENSDARG00000006617	0.422350247	0.195884596	0.000352126	323	0.742122183
pspc1	ENSDARG00000006621	8.43E-27	10.6531827	0.022421662	1805	8.19E-26
ppp2r2ab	ENSDARG00000006624	2.43E-13	7.229106965	0.015180634	521	1.75E-12
slitrk2	ENSDARG00000006636	0.581687676	-0.206212854	-0.000457501	7	0.742122183
lnpk	ENSDARG00000006639	0.010533911	2.306766829	0.004784026	149	0.035016565
eomesa	ENSDARG00000006640	0.886433911	-1.207779268	-7.75E-05	1	0.897421186
drg2	ENSDARG00000006642	0.587178783	-0.220293691	-0.000520751	64	0.742122183
bud13	ENSDARG00000006666	0.443353376	0.14247256	0.000235816	45	0.742122183
fam49a	ENSDARG00000006672	7.23E-15	7.692301675	0.016165086	795	5.41E-14
ripk1l	ENSDARG00000006677	0.691398025	-0.499816984	-0.001076704	24	0.766076586
pth2ra	ENSDARG00000006678	3.40E-12	6.861962947	0.014383975	241	2.35E-11
arhgef6	ENSDARG00000006683	2.17E-246	33.50317033	0.07062994	1167	6.22E-245
rpl12	ENSDARG00000006691	0.003511744	2.695728569	0.005556267	63	0.012792075
wipf2b	ENSDARG00000006712	0.000858434	3.135285656	0.00652689	157	0.003434267
specc1la	ENSDARG00000006719	0.107937912	1.237569245	0.002547924	473	0.268594754
tmem178b	ENSDARG00000006747	0	164.7777844	0.347639068	1283	0
mllt3	ENSDARG00000006754	0	60.42103073	0.12745143	1778	0
klhl41b	ENSDARG00000006757	0.582772173	-0.2089905	-0.000493856	39	0.742122183
fam234b	ENSDARG00000006758	0.599833324	-0.252915706	-0.000553357	10	0.742122183
slc24a3	ENSDARG00000006760	0	103.9407515	0.218794532	262	0
snd1	ENSDARG00000006766	9.38E-160	26.90583428	0.056736149	6094	2.14E-158
elovl4a	ENSDARG00000006773	5.92E-45	14.01954532	0.02934694	104	7.30E-44
cass4	ENSDARG00000006775	0.366497768	0.341143526	0.000655963	142	0.698157755
rb1	ENSDARG00000006782	2.37E-17	8.392767255	0.017645805	1054	1.90E-16
copz2	ENSDARG00000006786	3.93E-77	18.55192787	0.039036317	368	6.25E-76
arntl1a	ENSDARG00000006791	0.887612176	-1.213926878	-0.002612923	169	0.898473531
nt5dc1	ENSDARG00000006797	0.852911856	-1.049003977	-0.002262993	146	0.869809515
sult1st6	ENSDARG00000006811	0.80584864	-0.862699477	-7.27E-05	1	0.833205066
wdr26b	ENSDARG00000006812	0.001004062	3.089028206	0.006456913	1162	0.003972066
gtf2f2b	ENSDARG00000006816	0.602805721	-0.260616118	-0.000581901	16	0.742122183
urod	ENSDARG00000006818	0.140723428	1.077074785	0.002181296	50	0.333878036
galnt9	ENSDARG00000006832	0	101.3417119	0.213455589	331	0
mycn	ENSDARG00000006837	1.73E-17	8.429775814	0.017689677	295	1.39E-16
eef1a2	ENSDARG00000006838	0.71005309	-0.553539823	-0.001212622	45	0.773213383
gnmt	ENSDARG00000006840	0.715599691	-0.569818779	-0.001228831	38	0.776232114
parp9	ENSDARG00000006848	0.597981421	-0.248125692	-0.00054387	10	0.742122183
asic2	ENSDARG00000006849	4.12E-21	9.356489609	0.019657055	449	3.61E-20
nkain1	ENSDARG00000006859	0.193701205	0.864337691	0.001753908	144	0.430575333
kifap3b	ENSDARG00000006862	0.238367445	0.711563866	0.001433598	137	0.508470084
si:ch1073-349o24.2	ENSDARG00000006863	1.90E-13	7.262558968	0.015145291	86	1.37E-12
glra4a	ENSDARG00000006865	0	66.23654083	0.139678155	884	0
trh	ENSDARG00000006868	NA	NA	NA	0	1
stx17	ENSDARG00000006869	0.006213082	2.499805116	0.005183391	118	0.02159607
enpp4	ENSDARG00000006877	0.32591798	0.451213114	0.000878024	53	0.642163331
phf21aa	ENSDARG00000006878	4.95E-13	7.131770835	0.014980712	703	3.52E-12
mpped2a	ENSDARG00000006889	0	63.41370731	0.133772755	2254	0
kcns3a	ENSDARG00000006891	0.520825476	-0.052225459	-0.000124722	2	0.742122183
myo3b	ENSDARG00000006892	0	255.8521524	0.539720593	912	0
oprk1	ENSDARG00000006894	0.52571107	-0.064492776	-0.000154563	3	0.742122183
lhx6	ENSDARG00000006896	0.606566566	-0.270381374	-0.000619628	30	0.742122183
far1	ENSDARG00000006899	2.68E-23	9.874588832	0.020771287	971	2.44E-22
impdh2	ENSDARG00000006900	0.19418951	0.862560748	0.001753341	186	0.430623055
si:ch1073-459j12.1	ENSDARG00000006901	1.30E-37	12.76427884	0.026732015	121	1.47E-36
wnt8b	ENSDARG00000006911	1.05E-72	17.99594174	0.037240099	44	1.61E-71
arl8ba	ENSDARG00000006915	0.94174269	-1.569572418	-0.003354597	121	0.946127648
lrp5	ENSDARG00000006921	2.33E-29	11.18799484	0.023553834	2883	2.37E-28
cacna1ab	ENSDARG00000006923	1.69E-87	19.79368439	0.041513086	144	2.85E-86
fbxo38	ENSDARG00000006924	0.088993531	1.346978795	0.002772391	192	0.227802324
tbx16l	ENSDARG00000006939	0.650855201	-0.387630361	-0.000841926	16	0.747380826
gdpd3b	ENSDARG00000006944	0.602573741	-0.260014592	-0.000572961	10	0.742122183
cse1l	ENSDARG00000006963	4.83E-07	4.898518647	0.010249585	243	2.63E-06
zak	ENSDARG00000006978	0.018211563	2.092172078	0.004322942	102	0.057176401
ccdc113	ENSDARG00000006981	0.250096416	0.674186374	0.001330937	32	0.525224787
celf3b	ENSDARG00000006983	3.44E-05	3.980549553	0.008306148	167	0.000161516
creld1b	ENSDARG00000006990	0.58759012	-0.221350207	-0.000495636	8	0.742122183
hoxa11b	ENSDARG00000007009	0.589983885	-0.227503522	-0.000505229	8	0.742122183
ms4a17a.6	ENSDARG00000007018	0.524263861	-0.060858025	-0.000161849	3	0.742122183
uox	ENSDARG00000007024	0.531625181	-0.079355783	-0.000206948	6	0.742122183
ttc9c	ENSDARG00000007025	0.747505299	-0.666659895	-0.001449229	59	0.796248291
hnrpkl	ENSDARG00000007034	0.004739555	2.594273343	0.005406723	428	0.016861301
tmigd1	ENSDARG00000007040	0.503595262	-0.009012107	-7.19E-05	2	0.742122183
cnot4a	ENSDARG00000007045	0.015691511	2.152182006	0.004452283	118	0.050039998
mrps18b	ENSDARG00000007065	0.800406856	-0.843075378	-0.00181953	67	0.83196043
si:dkey-19a16.16	ENSDARG00000007067	NA	NA	NA	0	1
ankrd50l	ENSDARG00000007077	0.020282566	2.047947628	0.004219661	83	0.062855319
rhcgl1	ENSDARG00000007080	0.028852069	1.897938849	-3.39E-05	1	0.085797378
pias4a	ENSDARG00000007081	3.77E-05	3.958396878	0.008273774	271	0.000176675
aqp10a	ENSDARG00000007086	7.95E-14	7.379389516	0.01510767	26	5.79E-13
xab2	ENSDARG00000007092	0.00083859	3.142139559	0.006519278	97	0.003361112
her13	ENSDARG00000007097	9.69E-18	8.497491338	0.017569104	48	7.81E-17
itm2ba	ENSDARG00000007098	5.99E-08	5.293850239	0.011103657	641	3.45E-07
cx43.4	ENSDARG00000007099	1.44E-09	5.937860986	0.012462183	697	9.05E-09
lipia	ENSDARG00000007108	0.000405369	3.349102463	0.006961552	143	0.001690147
asb6	ENSDARG00000007125	0.558948556	-0.148303963	-0.000370395	76	0.742122183
acat2	ENSDARG00000007127	0.127922443	1.136266885	0.00231559	75	0.308252014
slc6a16a	ENSDARG00000007129	0.002899574	2.758927004	0.005733269	143	0.010706757
mrto4	ENSDARG00000007130	1.59E-05	4.159738485	0.008600872	55	7.73E-05
cnot3a	ENSDARG00000007135	0.10534482	1.251671358	0.002574744	280	0.263102932
gtf2h4	ENSDARG00000007136	0.008200171	2.39988235	0.004995978	367	0.027823199
psmc3	ENSDARG00000007141	0.389604295	0.280350525	0.000528154	134	0.733112966
l1cama	ENSDARG00000007149	5.85E-19	8.817462997	0.018528583	481	4.89E-18
kcnk2b	ENSDARG00000007151	0.528687753	-0.071971619	-0.00018317	3	0.742122183
itgb1bp1	ENSDARG00000007169	0.246385978	0.685906682	0.001355733	33	0.519116751
aig1	ENSDARG00000007171	0.000122745	3.666920416	0.007618233	91	0.000542894
plxna3	ENSDARG00000007172	0	66.37246193	0.140047315	5882	0
recql	ENSDARG00000007175	2.24E-07	5.047231222	0.010585249	846	1.25E-06
sash1a	ENSDARG00000007179	0	49.07590901	0.103513815	2075	0
slc30a4	ENSDARG00000007180	0.251673505	0.669232761	0.001336689	74	0.527809039
nadk2	ENSDARG00000007181	0.069558816	1.479084872	0.003040612	111	0.184379287
zbtb16a	ENSDARG00000007184	0	164.7996417	0.347819677	5640	0
ppp1r8a	ENSDARG00000007186	0.385212652	0.291818625	0.000540679	34	0.72685658
grm2b	ENSDARG00000007195	0.151666096	1.029313902	0.002068368	38	0.353269032
rae1	ENSDARG00000007196	0.108317258	1.235526782	0.002512941	53	0.269383386
mta1	ENSDARG00000007198	2.96E-37	12.69977556	0.026743409	2417	3.35E-36
cnpy2	ENSDARG00000007207	0.856557469	-1.064979819	-0.002269779	42	0.872908489
abce1	ENSDARG00000007216	0.000179971	3.56783631	0.00745601	372	0.000782158
wdr55	ENSDARG00000007217	0.045702562	1.688031804	0.003480776	123	0.128232633
actn1	ENSDARG00000007219	2.68E-146	25.73022355	0.054247264	2884	5.83E-145
ncam1b	ENSDARG00000007220	0	124.2381225	0.262194259	4709	0
pbk	ENSDARG00000007221	0.000263522	3.466621611	0.007204425	103	0.00112611
ryk	ENSDARG00000007231	3.20E-61	16.46638859	0.034696124	3321	4.54E-60
mycb	ENSDARG00000007241	1.28E-05	4.209272756	0.008771287	118	6.26E-05
acp2	ENSDARG00000007244	0.723186444	-0.592333762	-0.001276101	23	0.780964333
rundc3aa	ENSDARG00000007245	0.014422914	2.185587101	0.004532895	152	0.046407118
ric8a	ENSDARG00000007247	0.292712003	0.545479166	0.001042286	22	0.59479667
use1	ENSDARG00000007250	0.617307583	-0.298417108	-0.000656948	12	0.742122183
rab5ab	ENSDARG00000007257	0.260212406	0.642690707	0.001294817	661	0.541593217
nipsnap2	ENSDARG00000007264	0.139736648	1.081503293	0.002210317	125	0.332206528
mynn	ENSDARG00000007271	0.000117751	3.677531252	0.007655326	128	0.000521521
si:ch211-251b21.1	ENSDARG00000007275	3.71E-05	3.962558543	0.008234835	87	0.000173716
ela3l	ENSDARG00000007276	0.012447806	2.24301864	-2.91E-05	1	0.040617341
myf5	ENSDARG00000007277	0.849721432	-1.035239372	-7.51E-05	1	0.867032507
ect2	ENSDARG00000007278	7.08E-54	15.40937198	0.032445161	904	9.46E-53
yipf5	ENSDARG00000007279	0.679199518	-0.465461551	-0.001034349	75	0.759408999
mrpl57	ENSDARG00000007285	0.702697903	-0.53217587	-0.001150604	24	0.769117945
metrnlb	ENSDARG00000007289	0.442100223	0.145646516	0.000240921	36	0.742122183
aco2	ENSDARG00000007294	4.30E-06	4.449648776	0.009318741	446	2.18E-05
sh3gl3b	ENSDARG00000007302	0.000740497	3.178382028	0.006521804	38	0.002992502
tmpoa	ENSDARG00000007315	4.37E-10	6.130961015	0.012841541	256	2.79E-09
rpl7	ENSDARG00000007320	0.03131089	1.861867422	0.003864493	488	0.092324515
chmp4bb	ENSDARG00000007323	1.62E-06	4.654598983	0.009743694	303	8.54E-06
tbx16	ENSDARG00000007329	0.636288353	-0.348555162	-0.000792179	130	0.742308817
tcap	ENSDARG00000007344	0.043788479	1.708320127	0.003322902	15	0.123558338
degs1	ENSDARG00000007347	0.692864757	-0.503987039	-0.001119946	169	0.766528653
dmrt1	ENSDARG00000007349	0.001115779	3.057548229	0.006369009	210	0.004385872
fgf20a	ENSDARG00000007356	0.002884426	2.760638326	-2.18E-05	1	0.01065386
cxcr3.1	ENSDARG00000007358	0.56849345	-0.172539895	-6.30E-05	1	0.742122183
UBL4A	ENSDARG00000007359	0.79525135	-0.824778596	-0.001763421	35	0.827698193
sft2d1	ENSDARG00000007362	0.40637632	0.236876449	0.000437777	209	0.742122183
AMDHD1	ENSDARG00000007366	0.572504154	-0.182753174	-0.00041513	9	0.742122183
tcf7l1b	ENSDARG00000007369	5.62E-295	36.68825657	0.077381591	3847	1.82E-293
dysf	ENSDARG00000007370	1.41E-07	5.134786621	0.01071939	128	7.96E-07
slc26a3.1	ENSDARG00000007371	NA	NA	NA	0	1
odc1	ENSDARG00000007377	0.651722348	-0.389974633	-0.00087862	119	0.747778793
ubtd1a	ENSDARG00000007382	0.519929751	-0.049977274	-0.000124363	2	0.742122183
kcnk6	ENSDARG00000007383	0.609869653	-0.27897932	-0.00061457	13	0.742122183
cct7	ENSDARG00000007385	0.00877002	2.375187469	0.004944801	404	0.029570692
irf2a	ENSDARG00000007387	0.001064509	3.071618378	0.006399668	194	0.004195807
rnd3b	ENSDARG00000007396	0.000778814	3.163727077	0.006479466	36	0.003134139
lrrk1	ENSDARG00000007398	5.27E-61	16.43620573	0.034614431	974	7.45E-60
strap	ENSDARG00000007405	1.78E-05	4.134230036	0.008556574	56	8.61E-05
phox2a	ENSDARG00000007406	0.544323905	-0.111333122	-0.000257625	5	0.742122183
barx1	ENSDARG00000007407	0.550395611	-0.12666092	-0.000296912	7	0.742122183
ppifa	ENSDARG00000007409	0.092529436	1.3253386	0.002680567	36	0.235433585
slc2a1b	ENSDARG00000007412	8.21E-27	10.65559667	0.022418718	940	7.98E-26
arid2	ENSDARG00000007413	0.002625563	2.79121079	0.00582651	751	0.0097688
chmp4c	ENSDARG00000007418	0.137844882	1.090053076	0.002217968	77	0.328342198
ftcd	ENSDARG00000007421	0.555276324	-0.139003539	-0.000308334	6	0.742122183
apol1	ENSDARG00000007425	0.434377751	0.165239466	0.000265957	13	0.742122183
ndor1	ENSDARG00000007429	0.279405536	0.58460838	0.001157746	57	0.573518958
prdm12b	ENSDARG00000007430	7.62E-75	18.26669975	0.037788233	40	1.20E-73
avpr2aa	ENSDARG00000007436	7.43E-136	24.77962963	0.049367159	12	1.57E-134
ube2ib	ENSDARG00000007438	0.00011483	3.683935362	0.007704153	473	0.000509281
fbxl18	ENSDARG00000007443	0.271182616	0.609240209	0.001216684	111	0.560371173
ift81	ENSDARG00000007444	0.032791785	1.841259291	0.003806239	142	0.09605667
slc25a39	ENSDARG00000007449	0.867641958	-1.115313542	-0.002403342	143	0.88284939
srgap1a	ENSDARG00000007461	0	64.61844116	0.13633825	4123	0
tdrd1	ENSDARG00000007465	0.003624593	2.6851749	0.005457214	26	0.013171644
ifit10	ENSDARG00000007467	0.992144452	-2.415558535	-9.45E-05	1	0.992681202
fbxo8	ENSDARG00000007477	0.649928201	-0.38512663	-0.000863394	56	0.747163593
rpe65a	ENSDARG00000007480	0.599151381	-0.251151166	-0.000552572	11	0.742122183
epc2	ENSDARG00000007485	0.04758684	1.668715986	0.00345394	306	0.132885942
adrb1	ENSDARG00000007490	NA	NA	NA	5	1
st3gal8	ENSDARG00000007494	0.005299408	2.555654962	0.005321841	278	0.018675959
ufl1	ENSDARG00000007496	0.407737103	0.233369872	0.000427948	85	0.742122183
kmt2e	ENSDARG00000007523	0.001494542	2.968858201	0.006203769	1283	0.005766159
ndufs2	ENSDARG00000007526	0.023084615	1.993842868	0.004137584	255	0.070667633
zcchc9	ENSDARG00000007531	0.615456851	-0.293570267	-0.000644287	16	0.742122183
itln1	ENSDARG00000007534	0.55220604	-0.131236882	-0.000310225	6	0.742122183
opn4.1	ENSDARG00000007553	NA	NA	NA	0	1
sema3bl	ENSDARG00000007560	2.30E-35	12.35476362	0.025978036	428	2.54E-34
cdh23	ENSDARG00000007561	0	139.8486332	0.294878598	614	0
appbp2	ENSDARG00000007566	0.364744206	0.345806139	0.000668609	564	0.696208115
crybb1l1	ENSDARG00000007576	0.394994805	0.266324104	0.000491907	43	0.741262992
olfcb1	ENSDARG00000007582	0.514122713	-0.03540779	-0.0001122	2	0.742122183
bloc1s4	ENSDARG00000007597	0.401072882	0.250571054	0.00046415	91	0.742122183
zmynd8	ENSDARG00000007601	0.079271568	1.409988307	0.00290439	182	0.206572004
stxbp2	ENSDARG00000007603	0.027305524	1.921957951	0.003972052	125	0.081922901
wwox	ENSDARG00000007614	0.355117593	0.371540245	0.000721709	278	0.686992284
gins1	ENSDARG00000007624	0.529379633	-0.073710511	-0.000214028	58	0.742122183
mkrn2	ENSDARG00000007630	0.747484337	-0.666594275	-0.001432612	28	0.796248291
cnot4b	ENSDARG00000007639	0.027240074	1.922999225	0.003993158	482	0.081764431
nsfa	ENSDARG00000007654	0.000217032	3.518457642	0.007153562	24	0.000936095
crybb1l3	ENSDARG00000007655	0.634982807	-0.345079791	-6.54E-05	1	0.742122183
ccnh	ENSDARG00000007657	0.360851061	0.356184869	0.000684077	75	0.696055702
amph	ENSDARG00000007663	0	40.36453589	0.084876409	192	0
ghrb	ENSDARG00000007671	0.361852314	0.353512009	0.000678946	86	0.696208115
ttyh3b	ENSDARG00000007678	2.85E-06	4.537189506	0.009503126	467	1.47E-05
ppdpfa	ENSDARG00000007682	1.64E-05	4.15316227	0.00867668	194	7.95E-05
cul1b	ENSDARG00000007691	0.106863407	1.243382775	0.002561741	676	0.266296757
nfkbiab	ENSDARG00000007693	8.98E-17	8.234990191	0.017298302	477	7.09E-16
fabp7a	ENSDARG00000007697	4.30E-05	3.927308124	0.008124634	53	0.000200123
nsa2	ENSDARG00000007708	0.004874065	2.584637974	0.005359159	116	0.017289941
adamts8a	ENSDARG00000007709	0.229997403	0.738855401	0.00146967	35	0.494057672
rab3il1	ENSDARG00000007711	0.145536604	1.055770219	0.002110153	34	0.343430244
lgsn	ENSDARG00000007715	0.603042922	-0.261231282	-0.000572952	11	0.742122183
sub1b	ENSDARG00000007720	7.06E-05	3.805895445	0.007839752	53	0.000321909
nudt8	ENSDARG00000007722	0.69433473	-0.508175118	-0.001097175	20	0.766528653
efnb1	ENSDARG00000007723	6.67E-100	21.18423486	0.044652885	3031	1.21E-98
rgl2	ENSDARG00000007727	1.16E-162	27.15308936	0.057182509	525	2.68E-161
stn1	ENSDARG00000007734	0.85070668	-1.039469059	-0.002224218	48	0.867834102
zyg11	ENSDARG00000007737	0.109701534	1.228116952	0.002521413	184	0.272198574
atp1a1a.2	ENSDARG00000007739	0.533491251	-0.08404897	-0.00021213	4	0.742122183
il15l	ENSDARG00000007743	0.445374961	0.137355349	0.000223163	32	0.742122183
tsr1	ENSDARG00000007744	4.84E-07	4.898226324	0.010216329	134	2.64E-06
uqcrfs1	ENSDARG00000007745	0.026255338	1.938923315	0.004014301	163	0.079203451
lmnl3	ENSDARG00000007751	0.34927037	0.387291063	0.000731324	24	0.67724919
cpne2	ENSDARG00000007753	0.613265577	-0.287840484	-0.000632887	13	0.742122183
wdr61	ENSDARG00000007755	0.153655789	1.020879404	0.002079627	106	0.357132468
spg21	ENSDARG00000007760	0.076996454	1.425568591	0.002900657	49	0.201291618
klhdc10	ENSDARG00000007764	0.578650933	-0.198443438	-0.000472459	47	0.742122183
sult5a1	ENSDARG00000007769	NA	NA	NA	0	1
vash2	ENSDARG00000007774	1.22E-11	6.676926833	0.014029576	1493	8.31E-11
blk	ENSDARG00000007783	0.542740137	-0.107339403	-0.000244264	5	0.742122183
tmx2b	ENSDARG00000007786	0.54143152	-0.104040812	-0.00027897	135	0.742122183
zgc:112965	ENSDARG00000007787	0.573286771	-0.184748303	-0.000410115	8	0.742122183
atp2b1b	ENSDARG00000007788	0.557111598	-0.143650066	-0.000358077	38	0.742122183
ppp2r1ba	ENSDARG00000007791	0.594429226	-0.238953619	-0.000564251	481	0.742122183
cst3	ENSDARG00000007795	0.250714677	0.67224246	0.001348922	103	0.526291012
gas6	ENSDARG00000007804	0.713062226	-0.562352982	-0.001233644	68	0.775055924
cyth3a	ENSDARG00000007807	0.385913764	0.289985241	0.000544168	57	0.72780823
zdhhc16a	ENSDARG00000007808	0.72811433	-0.607119908	-0.00130413	33	0.784043928
sp3b	ENSDARG00000007812	0.054945664	1.598681776	0.003303417	223	0.150692837
rnpepl1	ENSDARG00000007813	0.063721508	1.52426304	0.003139145	126	0.170724057
palm1b	ENSDARG00000007818	4.10E-11	6.496727354	0.013613811	266	2.74E-10
atf3	ENSDARG00000007823	2.21E-31	11.59380726	0.024405073	1657	2.31E-30
camta1b	ENSDARG00000007824	1.84E-87	19.78933557	0.041640276	364	3.10E-86
map2k1	ENSDARG00000007825	6.99E-13	7.084277199	0.014711457	81	4.95E-12
ctsla	ENSDARG00000007836	0.001388342	2.991436269	0.006249354	806	0.005391775
MCHR2	ENSDARG00000007842	2.87E-11	6.550191742	0.012490343	6	1.93E-10
rtn4rl1a	ENSDARG00000007856	0.508834325	-0.022146179	-9.47E-05	3	0.742122183
tra2a	ENSDARG00000007863	0.019960777	2.054559673	0.004269919	434	0.061969357
pimr195	ENSDARG00000007864	NA	NA	NA	0	1
dazap2	ENSDARG00000007867	0.104077027	1.258657543	0.002589572	260	0.260413836
ehd3	ENSDARG00000007869	1.25E-105	21.79670304	0.045823147	263	2.32E-104
fancl	ENSDARG00000007885	5.72E-06	4.388172108	0.009155853	166	2.88E-05
slc35b2	ENSDARG00000007886	0.368638269	0.33546209	0.000645249	209	0.701306543
meox1	ENSDARG00000007891	0.003276017	2.718794337	0.005418347	18	0.011987369
pdcd2	ENSDARG00000007892	0.559775528	-0.150400124	-0.000348913	7	0.742122183
crnkl1	ENSDARG00000007901	0.637444696	-0.351636875	-0.000800443	215	0.742519259
lrp2b	ENSDARG00000007906	0.796161693	-0.827989205	-0.001771696	33	0.828412577
si:ch211-196i2.1	ENSDARG00000007912	4.91E-113	22.56384203	0.047436274	238	9.45E-112
xpnpep3	ENSDARG00000007916	0.009314626	2.35286788	0.004888089	191	0.031276656
ttc27	ENSDARG00000007918	1.47E-26	10.60134747	0.022301982	867	1.42E-25
ptpn1	ENSDARG00000007923	0.825753327	-0.937515712	-0.00202919	146	0.849245931
hmx4	ENSDARG00000007941	1.71E-25	10.36954538	0.021627831	79	1.62E-24
gabpb2a	ENSDARG00000007943	0.498210876	0.004484683	-5.12E-05	60	0.742122183
lhx1b	ENSDARG00000007944	NA	NA	NA	1	1
itga11b	ENSDARG00000007950	0.711981198	-0.559181871	-0.001204092	24	0.774457409
iars1	ENSDARG00000007955	0.109104317	1.231305476	0.002532022	270	0.271106428
hibadhb	ENSDARG00000007959	0.020337924	2.046819116	0.004244818	196	0.062989178
hnrnpaba	ENSDARG00000007960	0.006544044	2.481363331	0.005173157	782	0.022646137
cks1b	ENSDARG00000007971	0.520443059	-0.051265595	-0.00016636	31	0.742122183
fth1b	ENSDARG00000007975	0.625548746	-0.320086832	-0.000705485	17	0.742122183
si:ch211-220f16.2	ENSDARG00000007976	0.790542919	-0.8083065	-0.001765615	864	0.824355405
onecut1	ENSDARG00000007982	0.001436979	2.980907199	0.006120808	39	0.005563138
masp2	ENSDARG00000007988	0.528721521	-0.072056482	-0.000192201	4	0.742122183
nedd8	ENSDARG00000007989	0.654161035	-0.396579015	-0.000863258	15	0.748429312
wt1b	ENSDARG00000007990	0.413926331	0.217456425	0.000382409	26	0.742122183
pou2f1b	ENSDARG00000007996	5.48E-08	5.309961468	0.011143795	1295	3.17E-07
zgc:194189	ENSDARG00000008010	1.42E-08	5.550871984	0.01020087	5	8.47E-08
nudt17	ENSDARG00000008014	0.097057103	1.298503988	0.002651782	71	0.24505144
mxg	ENSDARG00000008019	0.032353152	1.847281836	0.0037751	44	0.094975942
med31	ENSDARG00000008020	0.758722423	-0.702198863	-0.001532067	94	0.801012884
kif18a	ENSDARG00000008022	1.15E-19	8.99792322	0.018905261	470	9.77E-19
niban2b	ENSDARG00000008026	3.70E-07	4.950646457	0.010343614	154	2.04E-06
mep1a.2	ENSDARG00000008029	0.520808064	-0.052181754	-0.000130245	2	0.742122183
myl9b	ENSDARG00000008030	9.77E-11	6.36497885	0.013346447	309	6.40E-10
sart3	ENSDARG00000008032	9.76E-12	6.709590157	0.014086764	585	6.67E-11
skib	ENSDARG00000008034	0.00056905	3.253955877	0.00680204	821	0.002335368
si:dkey-42i9.4	ENSDARG00000008049	0.247857416	0.681247602	0.001362836	65	0.521749937
scara3	ENSDARG00000008060	1.21E-05	4.222301387	0.008726401	44	5.92E-05
tma16	ENSDARG00000008068	0.661791053	-0.41735619	-0.000906473	19	0.751372745
illr4	ENSDARG00000008075	0.597123112	-0.245907581	-0.000573588	59	0.742122183
olfcd1	ENSDARG00000008095	NA	NA	NA	0	1
srsf9	ENSDARG00000008097	0.193531686	0.864955211	0.001754759	118	0.430575333
ifit9	ENSDARG00000008098	0.5	0	-6.05E-05	1	0.742122183
slc7a10a	ENSDARG00000008100	8.65E-07	4.782659033	0.00997555	155	4.64E-06
mettl2a	ENSDARG00000008105	0.444007042	0.140817543	0.000234838	121	0.742122183
src	ENSDARG00000008107	6.54E-29	11.09627825	0.023338166	642	6.60E-28
si:ch211-195d17.2	ENSDARG00000008119	0.660054869	-0.41261288	-0.000896571	21	0.750588109
pcdh15b	ENSDARG00000008127	0	175.2337109	0.369706553	1227	0
sox1b	ENSDARG00000008131	0.649432686	-0.38378929	-0.000835143	18	0.747039456
foxl1	ENSDARG00000008133	0.505600762	-0.01403949	-7.98E-05	2	0.742122183
kcnab1a	ENSDARG00000008140	0	72.18887643	0.152245022	1017	0
rbl1	ENSDARG00000008141	0.042141611	1.72635691	0.003574257	284	0.119663149
stxbp3	ENSDARG00000008142	0.00894381	2.367936224	0.004924729	262	0.030121373
serinc5	ENSDARG00000008153	1.31E-17	8.462549455	0.017799465	1996	1.05E-16
sms	ENSDARG00000008155	0.903205531	-1.300035102	-0.00276836	51	0.912972774
btr33	ENSDARG00000008164	0.516989837	-0.042600087	-0.000107647	2	0.742122183
caspa	ENSDARG00000008165	0.52701363	-0.067764957	-0.000150354	4	0.742122183
dbnla	ENSDARG00000008170	0.635741309	-0.347098418	-0.000780103	50	0.742297125
hoxb1a	ENSDARG00000008174	0.849721432	-1.035239372	-7.51E-05	1	0.867032507
si:ch73-111e15.1	ENSDARG00000008182	0.523007372	-0.057702935	-0.000159486	3	0.742122183
mia3	ENSDARG00000008184	0.000804364	3.154319712	0.006595582	1428	0.00323043
syk	ENSDARG00000008186	0.362831788	0.350899727	0.00065815	24	0.696208115
sf1	ENSDARG00000008188	0.024662303	1.965775006	0.004082732	444	0.074886402
tmeff1a	ENSDARG00000008191	0.119200318	1.178993824	0.002393517	65	0.290752202
pank1a	ENSDARG00000008192	0.703337089	-0.53402271	-0.001159388	29	0.769492263
ugp2b	ENSDARG00000008200	0.202061577	0.834280116	0.001682542	76	0.444636885
pax1a	ENSDARG00000008203	0.535506369	-0.089119095	-0.000203998	4	0.742122183
myt1la	ENSDARG00000008209	2.17E-23	9.895677328	0.020680994	99	1.98E-22
kcnk13a	ENSDARG00000008212	0.530387772	-0.076244655	-0.000189952	3	0.742122183
znf410	ENSDARG00000008218	0.017774222	2.102055155	0.004355074	138	0.055932203
crygm4	ENSDARG00000008219	0.548377142	-0.121562245	-0.000275711	6	0.742122183
vps35	ENSDARG00000008224	0.002405728	2.819393019	0.005884314	578	0.008998717
cog5	ENSDARG00000008235	0.759648114	-0.705171085	-0.001545792	318	0.801663295
sars1	ENSDARG00000008237	0.175576116	0.932356667	0.00190299	287	0.399755258
manba	ENSDARG00000008238	0.38531215	0.291558382	0.00054896	70	0.726991342
mocs3	ENSDARG00000008239	4.62E-09	5.744028518	0.012046444	461	2.82E-08
cct8	ENSDARG00000008243	0.348040297	0.39061668	0.000762372	323	0.675622985
vezf1a	ENSDARG00000008247	1.22E-15	7.916399239	0.016639419	931	9.38E-15
ptchd4	ENSDARG00000008249	0.761516362	-0.711188755	-0.001525897	30	0.803111142
cnot6a	ENSDARG00000008255	0.000141849	3.629747447	0.007599094	1607	0.000624832
mfsd4ab	ENSDARG00000008263	0.542415541	-0.106521098	-0.000246699	4	0.742122183
klhl24b	ENSDARG00000008275	0.01427041	2.189771399	0.00454526	186	0.045979275
rcor2	ENSDARG00000008278	0.00017142	3.58057371	0.007477689	268	0.000746579
map2k7	ENSDARG00000008279	0.057450518	1.576541615	0.003242804	95	0.156481045
fam114a1	ENSDARG00000008287	0.140586196	1.077689395	0.002195073	85	0.333644161
eif2s3	ENSDARG00000008292	0.033236422	1.835221719	0.003807405	422	0.097194199
hand2	ENSDARG00000008305	0.541051469	-0.103083045	-0.00024488	4	0.742122183
rdh5	ENSDARG00000008306	0.507177635	-0.017992633	-8.39E-05	2	0.742122183
ip6k2a	ENSDARG00000008310	3.22E-12	6.869691842	0.01442059	459	2.23E-11
ambra1a	ENSDARG00000008322	0.002969052	2.751179805	0.005742673	843	0.010947692
asic1a	ENSDARG00000008329	2.03E-05	4.104559735	0.008562045	145	9.75E-05
znfl2a	ENSDARG00000008333	0.597047485	-0.245712196	-0.000545975	11	0.742122183
mcl1b	ENSDARG00000008363	0.027459616	1.919514669	0.003981334	273	0.082308911
csnk1da	ENSDARG00000008370	2.01E-75	18.33939556	0.038644107	2002	3.16E-74
spred2b	ENSDARG00000008372	4.25E-20	9.106708503	0.019157876	1797	3.65E-19
epn2	ENSDARG00000008377	0.0465734	1.679026912	0.003480264	663	0.130407533
brd7	ENSDARG00000008380	0.333976196	0.428959921	0.000841354	169	0.654355782
arpc1a	ENSDARG00000008383	0.001898343	2.894577943	0.006033312	252	0.007195418
hdac6	ENSDARG00000008384	0.189074443	0.88131216	0.001793994	230	0.424074453
mmp14b	ENSDARG00000008388	0.000296541	3.434758124	0.007173007	286	0.00125746
snupn	ENSDARG00000008395	0.00293107	2.75539452	0.005596196	31	0.010818427
ftr24	ENSDARG00000008396	0.559241774	-0.14904712	-0.000334757	5	0.742122183
cacna1c	ENSDARG00000008398	0	40.24282221	0.084339309	111	0
phospho1	ENSDARG00000008403	0.770992232	-0.742118509	-0.001607293	54	0.810045478
tspan7b	ENSDARG00000008407	1.18E-07	5.169068045	0.010798017	155	6.66E-07
atp11a	ENSDARG00000008413	0	43.5086122	0.091757273	1737	0
exoc3l2a	ENSDARG00000008414	0.496838221	0.007925487	-4.87E-05	2	0.742122183
unc45b	ENSDARG00000008433	0.148834163	1.041446597	0.002126937	126	0.349692754
bcl2l1	ENSDARG00000008434	0.01003247	2.32513131	0.004840028	480	0.033504542
atxn10	ENSDARG00000008439	0.045962758	1.685326914	0.003439401	49	0.128920781
fkbp4	ENSDARG00000008447	0.283556624	0.572308124	0.001144025	234	0.580337372
pcolce2a	ENSDARG00000008450	0.537983298	-0.095354312	-0.000219076	5	0.742122183
cpeb1b	ENSDARG00000008454	0.614272913	-0.2904733	-0.000636336	13	0.742122183
faah2a	ENSDARG00000008457	0.612719719	-0.286414641	-0.000627176	11	0.742122183
anapc5	ENSDARG00000008461	0.222103049	0.765109912	0.001525915	40	0.480505694
apex2	ENSDARG00000008472	0.757471254	-0.698191418	-0.001499149	29	0.799985548
asb14a	ENSDARG00000008473	0.594393511	-0.238861502	-0.000530244	13	0.742122183
trmt61a	ENSDARG00000008480	5.70E-17	8.289142573	0.017418225	645	4.52E-16
lrp3	ENSDARG00000008485	0.034713592	1.815629768	0.003723541	65	0.101101821
dmd	ENSDARG00000008487	0.001006188	3.088399668	0.006455223	1053	0.003979869
ltv1	ENSDARG00000008490	0.728488832	-0.608249007	-0.001332268	81	0.7842515
si:ch211-107o10.3	ENSDARG00000008491	0.510720268	-0.026874962	-0.000116714	74	0.742122183
myl6	ENSDARG00000008494	0.447514031	0.131944661	0.000215359	82	0.742122183
pno1	ENSDARG00000008502	0.294296865	0.540875021	0.00106663	61	0.597220348
glcci1a	ENSDARG00000008503	4.54E-19	8.845794813	0.018598778	839	3.81E-18
sox21b	ENSDARG00000008540	0.714250587	-0.565845481	-0.001239171	61	0.775799681
chia.4	ENSDARG00000008541	NA	NA	NA	0	1
yod1	ENSDARG00000008542	0.833956458	-0.969918567	-0.002089837	71	0.856415365
arhgap12a	ENSDARG00000008548	0.022050366	2.013132128	0.004183206	499	0.067806184
pole3	ENSDARG00000008551	0.280873554	0.580248417	0.001135547	35	0.576075574
zgc:136872	ENSDARG00000008553	0.535032805	-0.087927387	-0.000242148	38	0.742122183
brap	ENSDARG00000008560	0.418929585	0.204632618	0.000368085	107	0.742122183
slc25a24	ENSDARG00000008568	0.073798718	1.448070136	0.002970203	89	0.193910738
fam20b	ENSDARG00000008573	1.09E-05	4.245912026	0.008894546	720	5.35E-05
lyst	ENSDARG00000008575	3.48E-14	7.488450025	0.015730326	598	2.56E-13
mtmr8	ENSDARG00000008592	9.09E-06	4.286048532	0.008928264	108	4.50E-05
nbas	ENSDARG00000008593	4.64E-09	5.743334148	0.01206101	2255	2.84E-08
cops3	ENSDARG00000008623	0.28866997	0.557274435	0.001105417	87	0.588291449
mttp	ENSDARG00000008637	6.61E-09	5.683121774	0.011804211	70	4.00E-08
kifap3a	ENSDARG00000008639	0.001274011	3.017579499	0.006278687	154	0.00497087
coro1b	ENSDARG00000008660	0.002979573	2.750020922	0.005715452	130	0.010978755
fign	ENSDARG00000008662	4.47E-181	28.67033329	0.060457218	3906	1.10E-179
snx3	ENSDARG00000008678	0.026393507	1.936659221	0.004008573	160	0.079555376
epas1a	ENSDARG00000008697	0.000959697	3.102429409	0.006458837	148	0.003804695
apeh	ENSDARG00000008703	0.02165097	2.020785832	0.004163076	74	0.06668097
paip2b	ENSDARG00000008706	0.372161361	0.326134333	0.000624696	160	0.706658988
lmo3	ENSDARG00000008720	2.06E-08	5.485353215	0.011494754	317	1.22E-07
prkcba	ENSDARG00000008723	8.23E-35	12.25164633	0.025790591	1293	9.04E-34
ranbp3a	ENSDARG00000008727	0.303930904	0.513127969	0.001016779	138	0.607158319
zgc:66479	ENSDARG00000008732	0.784468741	-0.787374759	-0.001687417	33	0.819854779
atp6ap2	ENSDARG00000008735	0.026677428	1.932037674	0.003993401	122	0.080289662
esf1	ENSDARG00000008740	0.171208287	0.949401253	0.001928961	109	0.391566554
ube2na	ENSDARG00000008748	0.383770886	0.295591886	0.000561563	236	0.724769932
entpd6	ENSDARG00000008757	1.32E-10	6.318715527	0.013247204	310	8.60E-10
tmed5	ENSDARG00000008765	0.411861627	0.222758775	0.000403962	64	0.742122183
tle2b	ENSDARG00000008767	9.58E-17	8.22722107	0.017274957	369	7.56E-16
cacng1a	ENSDARG00000008772	0.185754276	0.893651184	0.001791584	36	0.418258084
prpf4ba	ENSDARG00000008784	0.249922433	0.674733862	0.001357322	157	0.524944565
dldh	ENSDARG00000008785	0.901032543	-1.287457387	-0.002768909	212	0.910918536
camk1gb	ENSDARG00000008788	0.238130145	0.712330259	0.001397329	31	0.508084149
actr3b	ENSDARG00000008790	0.607267753	-0.272204874	-0.000593913	11	0.742122183
her5	ENSDARG00000008796	NA	NA	NA	0	1
marcksb	ENSDARG00000008803	0.042942287	1.717517975	0.00355445	243	0.12146184
orc3	ENSDARG00000008805	1.31E-47	14.44671464	0.030381411	391	1.67E-46
bokb	ENSDARG00000008807	0.548106309	-0.120878361	-0.000285927	7	0.742122183
eml2	ENSDARG00000008808	7.36E-36	12.44594524	0.026076729	146	8.18E-35
cmtm3	ENSDARG00000008811	0.58032149	-0.202715995	-0.000462341	12	0.742122183
glud1a	ENSDARG00000008816	0.801589089	-0.847310954	-0.001836694	113	0.832921771
hsf1	ENSDARG00000008818	5.83E-28	10.89892916	0.022877415	223	5.77E-27
chga	ENSDARG00000008829	0.010087516	2.323076696	0.004787985	59	0.033666663
neu1	ENSDARG00000008832	0.028562958	1.902346152	0.00389764	54	0.085172418
si:dkey-46g23.5	ENSDARG00000008835	0.697638178	-0.517619686	-6.78E-05	1	0.766528653
hmbsa	ENSDARG00000008840	0.88716524	-1.211589592	-0.002584179	68	0.898060919
ptprq	ENSDARG00000008849	0	140.6190117	0.296537945	670	0
elp4	ENSDARG00000008852	0.0351652	1.809776848	0.003754206	451	0.102222674
cyp7b1	ENSDARG00000008858	0.057247994	1.578303127	0.003222762	79	0.156093624
mylipa	ENSDARG00000008859	7.43E-31	11.48969231	0.024169024	630	7.70E-30
tfap2e	ENSDARG00000008861	0.000268441	3.461646656	0.007190879	91	0.001146374
cabp4	ENSDARG00000008866	0.599689632	-0.252543836	-0.00056078	10	0.742122183
rap1b	ENSDARG00000008867	6.44E-18	8.544746674	0.017974629	2806	5.22E-17
usp28	ENSDARG00000008880	3.42E-11	6.524081334	0.013552786	63	2.29E-10
hprt1	ENSDARG00000008884	0.067833619	1.492121725	0.003072162	142	0.180249185
msx1b	ENSDARG00000008886	6.43E-10	6.069106556	0.012663924	104	4.08E-09
ctns	ENSDARG00000008890	0.592625795	-0.234304736	-0.000541818	25	0.742122183
smarca2	ENSDARG00000008904	0.069871261	1.476750527	0.003054311	796	0.185018071
si:ch211-241e1.5	ENSDARG00000008906	0.58720529	-0.220361766	-0.000485997	11	0.742122183
slc8a2a	ENSDARG00000008912	6.70E-289	36.30518818	0.076086528	94	2.13E-287
mrpl53	ENSDARG00000008920	0.056997845	1.580485648	0.003209905	33	0.155509822
renbp	ENSDARG00000008931	0.403562333	0.244137067	0.000440211	22	0.742122183
sec11a	ENSDARG00000008936	0.737917216	-0.636937481	-0.001398107	139	0.790294199
ccdc127b	ENSDARG00000008946	0.533221848	-0.083371305	-0.000196415	5	0.742122183
rtf1	ENSDARG00000008947	0.259109429	0.646093417	0.001299295	256	0.539774828
pla2g3	ENSDARG00000008948	0.525571338	-0.064141793	-0.00016924	3	0.742122183
pofut1	ENSDARG00000008953	0.221808166	0.766100792	0.001547378	128	0.479951237
tbl1xr1b	ENSDARG00000008966	1.33E-06	4.695557401	0.009840487	625	7.04E-06
fgb	ENSDARG00000008969	0.507169963	-0.017973401	-8.50E-05	2	0.742122183
mdn1	ENSDARG00000008976	9.48E-13	7.041855876	0.01478162	481	6.68E-12
golga1	ENSDARG00000008979	0.012032027	2.256105027	0.00469691	594	0.039554755
casq2	ENSDARG00000008982	0.030634372	1.871551026	0.003864259	99	0.090463636
sh3glb2a	ENSDARG00000008983	0.047195978	1.672671636	0.003459951	249	0.131965255
e2f7	ENSDARG00000008986	0.050605695	1.639008982	0.003377873	134	0.140212161
pdia6	ENSDARG00000009001	9.75E-49	14.62488229	0.030795818	1034	1.25E-47
col11a1b	ENSDARG00000009014	0	50.85612826	0.107258741	1511	0
rhbg	ENSDARG00000009018	2.69E-77	18.57225879	0.038723197	62	4.28E-76
cnr1	ENSDARG00000009020	0.496608349	0.00850171	-4.31E-05	25	0.742122183
chrna1	ENSDARG00000009021	0.726824013	-0.60323559	-0.001301861	26	0.783325893
ankrd28b	ENSDARG00000009023	2.06E-18	8.675209016	0.018247313	1800	1.70E-17
ank2a	ENSDARG00000009026	0.580293039	-0.202643199	-0.000484471	80	0.742122183
tnikb	ENSDARG00000009031	1.85E-58	16.07682056	0.033870414	2615	2.58E-57
si:ch73-141c7.1	ENSDARG00000009040	0.002275883	2.83715388	0.005921627	562	0.008548843
nphp1	ENSDARG00000009046	0.152963568	1.023805532	0.002053306	36	0.355651285
cbr4	ENSDARG00000009074	0.723256416	-0.592542802	-0.001294522	55	0.780964333
BX296551.1	ENSDARG00000009079	0.365017193	0.345079791	-5.57E-05	1	0.696208115
cd74a	ENSDARG00000009087	0.54359989	-0.109507189	-0.000259419	4	0.742122183
gata2b	ENSDARG00000009094	0.578502689	-0.19806447	-0.000445045	8	0.742122183
serinc1	ENSDARG00000009106	1.65E-05	4.152063631	0.008688973	371	7.98E-05
pigc	ENSDARG00000009113	0.619067021	-0.303031366	-0.000662259	16	0.742122183
sele	ENSDARG00000009123	0.523048968	-0.057807375	-0.000144472	3	0.742122183
slc10a4	ENSDARG00000009131	0.511655852	-0.029221046	-0.000104162	4	0.742122183
myo1eb	ENSDARG00000009133	0.074133593	1.445679252	0.002986114	442	0.19468713
hlx1	ENSDARG00000009134	0.512879243	-0.032289085	-0.000102944	2	0.742122183
tp53bp2a	ENSDARG00000009136	0.324196757	0.455995084	0.000900435	400	0.639307115
ppp1r13bb	ENSDARG00000009142	0.047452167	1.670075973	0.003463031	1125	0.132609984
pla2g1b	ENSDARG00000009153	0.51543803	-0.038707067	-0.000101709	3	0.742122183
kmo	ENSDARG00000009160	0.61252638	-0.285909759	-0.000627401	14	0.742122183
ftr55	ENSDARG00000009161	0.80584864	-0.862699477	-7.27E-05	1	0.833205066
mob1ba	ENSDARG00000009169	0.73020777	-0.613441489	-0.001334418	54	0.785481495
ctr9	ENSDARG00000009170	0.015335698	2.161310069	0.004491727	310	0.049039384
zfand1	ENSDARG00000009178	0.728772353	-0.609104321	-0.001307441	29	0.784458875
col16a1	ENSDARG00000009194	1.37E-278	35.64586085	0.075157586	1525	4.24E-277
anxa3a	ENSDARG00000009196	0.180186062	0.914656242	0.00183428	38	0.408169511
prkcda	ENSDARG00000009208	0.445477938	0.137094783	0.000226147	83	0.742122183
slc9a6a	ENSDARG00000009209	0.309076245	0.498470454	0.000989876	389	0.615206191
ppiaa	ENSDARG00000009212	0.017162884	2.116223916	0.004403001	787	0.054225419
mfsd13a	ENSDARG00000009214	0.274162991	0.600270492	0.001201876	188	0.565267411
zgc:112437	ENSDARG00000009215	0.607348005	-0.272413634	-0.000605814	14	0.742122183
tom1l2	ENSDARG00000009217	8.19E-34	12.06391357	0.02536106	380	8.82E-33
mars2	ENSDARG00000009218	0.676222069	-0.457160256	-0.00098679	18	0.757899269
fev	ENSDARG00000009242	NA	NA	NA	1	1
etfb	ENSDARG00000009250	0.245973708	0.687214743	0.001380971	118	0.518374673
napepld	ENSDARG00000009252	0.534304009	-0.086093637	-0.000212802	5	0.742122183
rtraf	ENSDARG00000009253	0.419404385	0.203417439	0.000363801	58	0.742122183
FAR2	ENSDARG00000009262	8.14E-29	11.0767193	0.023272552	304	8.20E-28
uevld	ENSDARG00000009266	0.44303114	0.143288574	0.00023756	46	0.742122183
zgc:136439	ENSDARG00000009267	0.589730879	-0.226852753	-0.000501711	11	0.742122183
ppm1da	ENSDARG00000009273	0.000244183	3.487057237	0.007275074	212	0.001047969
smyd1a	ENSDARG00000009280	0.105778954	1.249293052	0.002551927	70	0.263958046
dnm1b	ENSDARG00000009281	0.393394198	0.270483388	0.000502313	51	0.738955496
rpl15	ENSDARG00000009285	5.12E-09	5.726787347	0.012018826	807	3.12E-08
dusp8a	ENSDARG00000009299	1.29E-39	13.11865588	0.02762088	1262	1.50E-38
pvalb6	ENSDARG00000009311	1.48E-279	35.70816351	0.075209819	419	4.60E-278
napsa	ENSDARG00000009313	0.602448377	-0.25968956	-0.00057185	16	0.742122183
clgn	ENSDARG00000009315	8.34E-06	4.305275548	0.008996697	202	4.14E-05
aif1l	ENSDARG00000009336	1.07E-35	12.41574791	0.02612599	703	1.19E-34
nrap	ENSDARG00000009341	1.80E-08	5.50947779	0.011486832	87	1.07E-07
txndc5	ENSDARG00000009342	1.15E-06	4.725708147	0.009891098	294	6.09E-06
caprin1a	ENSDARG00000009346	0.002353083	2.826486995	0.005892585	309	0.008815804
atg3	ENSDARG00000009350	0.002991799	2.748678845	0.005661142	54	0.011020581
fgf6a	ENSDARG00000009351	2.16E-28	10.98883891	0.023108371	538	2.16E-27
diras1b	ENSDARG00000009372	NA	NA	NA	0	1
mpp4l	ENSDARG00000009386	0.588086018	-0.222624246	-0.000488689	10	0.742122183
robo4	ENSDARG00000009387	2.25E-182	28.77427632	0.0605568	406	5.55E-181
npl	ENSDARG00000009390	0.174542644	0.936365006	0.001879083	39	0.397716989
vcanb	ENSDARG00000009401	0	88.47244533	0.186265322	260	0
si:ch211-210b2.2	ENSDARG00000009402	NA	NA	NA	0	1
mef2cb	ENSDARG00000009418	1.05E-110	22.32523204	0.047012997	527	2.00E-109
tmem30c	ENSDARG00000009430	0.518908479	-0.047414286	-0.000141906	3	0.742122183
ubxn7	ENSDARG00000009436	0.047382599	1.670779709	0.003454057	214	0.132454319
myog	ENSDARG00000009438	0.526315003	-0.066009836	-0.000170881	3	0.742122183
zgc:92137	ENSDARG00000009443	0.556261515	-0.141497456	-0.000325944	7	0.742122183
atp5mc3b	ENSDARG00000009447	0.000372959	3.372120354	0.007032184	205	0.001562566
slc35e4	ENSDARG00000009459	0.43661138	0.159566258	0.000273277	75	0.742122183
rgs9bp	ENSDARG00000009466	0.536878519	-0.092572789	-0.000227834	4	0.742122183
hnf1a	ENSDARG00000009470	0.521289286	-0.053389679	-0.000117375	3	0.742122183
nid2b	ENSDARG00000009471	0.540719443	-0.102246381	-0.000247077	5	0.742122183
med19b	ENSDARG00000009472	0.457971228	0.105546146	0.000159323	52	0.742122183
ppardb	ENSDARG00000009473	0.053643948	1.610503896	0.003323893	169	0.147634896
prkar2ab	ENSDARG00000009477	0.652840687	-0.393001157	-0.000881015	66	0.748101397
pdcl	ENSDARG00000009480	0.343314501	0.403433969	0.000787783	184	0.668588689
slc38a8a	ENSDARG00000009482	0.602076256	-0.258724924	-0.000574558	10	0.742122183
arf1	ENSDARG00000009484	0.140031952	1.080175799	0.002216756	509	0.332664216
gipc2	ENSDARG00000009488	0.000107093	3.701668332	0.007750713	1524	0.000476917
MAP3K13	ENSDARG00000009493	1.83E-14	7.572747571	0.015916215	1030	1.35E-13
xrcc1	ENSDARG00000009494	2.18E-09	5.870146079	0.012309179	406	1.35E-08
syne1a	ENSDARG00000009499	4.08E-17	8.328791591	0.017498259	538	3.24E-16
prelid3b	ENSDARG00000009505	2.03E-09	5.881822635	0.012342577	629	1.26E-08
tnfa	ENSDARG00000009511	0.5	3.38E-15	-6.05E-05	1	0.742122183
rnf150b	ENSDARG00000009524	0.213996553	0.792630548	0.001593615	65	0.466357945
tial1	ENSDARG00000009525	0.017387584	2.110966774	0.00438944	475	0.054855529
wls	ENSDARG00000009534	3.25E-37	12.69255685	0.02671696	985	3.67E-36
cldnb	ENSDARG00000009544	9.91E-07	4.75523315	0.009971382	1042	5.29E-06
ubr4	ENSDARG00000009549	0.029995398	1.880861251	0.003908659	1682	0.08874881
foxi3b	ENSDARG00000009550	NA	NA	NA	0	1
gng3	ENSDARG00000009553	0.145403616	1.056352426	0.002058809	16	0.343189647
wrap73	ENSDARG00000009557	0.382726798	0.298327003	0.000566974	197	0.723220133
spegb	ENSDARG00000009567	0.012319615	2.247012463	0.00466076	146	0.04036693
ca10b	ENSDARG00000009568	0.646180309	-0.37502835	-0.000841285	48	0.745318093
papola	ENSDARG00000009585	8.24E-05	3.76765893	0.007887672	935	0.000372047
nr1d2b	ENSDARG00000009594	0.000522732	3.277997509	0.006833795	194	0.002151075
ccnc	ENSDARG00000009607	0.096542556	1.301506584	0.002666087	99	0.243966413
rgs12a	ENSDARG00000009610	7.37E-41	13.33369117	0.028081152	2336	8.69E-40
chia.3	ENSDARG00000009612	NA	NA	NA	0	1
CABZ01027646.1	ENSDARG00000009624	5.14E-13	7.126775654	0.014873244	88	3.65E-12
nrbp2b	ENSDARG00000009626	0.019077754	2.073180249	0.004255837	54	0.059649946
unc119.1	ENSDARG00000009629	0.860186061	-1.08115566	-0.002332328	150	0.876123579
rcvrn3	ENSDARG00000009637	0.053214694	1.614452147	0.003321379	103	0.146624972
psmb1	ENSDARG00000009640	0.40998716	0.227578007	0.000415414	78	0.742122183
lhfpl2a	ENSDARG00000009653	0.009136184	2.360052109	0.004887525	104	0.030733283
fgfr1op2	ENSDARG00000009657	0.759363737	-0.704257342	-0.001510345	28	0.801463918
si:ch211-197g15.6	ENSDARG00000009673	0.519178625	-0.048092216	-0.00013491	4	0.742122183
dlg1	ENSDARG00000009677	1.75E-23	9.917088009	0.020872857	4229	1.60E-22
med27	ENSDARG00000009681	2.07E-05	4.099022265	0.008584939	751	9.97E-05
ppa2	ENSDARG00000009685	0.671414989	-0.443823743	-0.000985415	62	0.755772407
daam1b	ENSDARG00000009689	2.68E-140	25.18842708	0.053107207	3650	5.73E-139
llgl1	ENSDARG00000009693	1.77E-24	10.14359354	0.02134426	1460	1.64E-23
ascl1b	ENSDARG00000009702	0.069018676	1.483139496	0.002957023	21	0.183097496
rpn2	ENSDARG00000009724	4.39E-27	10.71372555	0.022553581	3375	4.28E-26
twf2b	ENSDARG00000009727	0	74.74161479	0.157575253	618	0
kif21b	ENSDARG00000009733	0.000359522	3.382212743	0.00706999	525	0.001509445
gigyf2	ENSDARG00000009735	0.113856498	1.20627105	0.002484329	1007	0.279693781
cacnb4a	ENSDARG00000009738	4.62E-06	4.434152981	0.009080562	33	2.34E-05
ppp1r7	ENSDARG00000009740	0.923553607	-1.42938786	-0.003049208	79	0.930380904
efhc1	ENSDARG00000009743	0.000474864	3.305010889	0.006877932	146	0.001965654
fbxw2	ENSDARG00000009745	0.115574644	1.19740358	0.002455319	160	0.283242659
dffb	ENSDARG00000009748	0.772848989	-0.748262196	-0.001601362	28	0.811310542
sf3b6	ENSDARG00000009753	0.6647348	-0.425420176	-0.000950794	86	0.752601753
zc3h11a	ENSDARG00000009754	0.024441229	1.969615457	0.004094283	868	0.074276093
srek1	ENSDARG00000009764	0.001380431	2.993180637	0.0062458	360	0.00536427
ppme1	ENSDARG00000009771	0.147713523	1.046290247	0.002126525	67	0.347501231
mcl1a	ENSDARG00000009779	0.001079759	3.067369404	0.00639652	274	0.00425074
myh11a	ENSDARG00000009782	0.853939193	-1.053478782	-0.002249609	46	0.870651451
slc49a4	ENSDARG00000009783	0.076180534	1.43124131	0.002957188	575	0.19950133
klc1a	ENSDARG00000009796	0.020965884	2.034196684	0.004231908	1456	0.064755896
smfn	ENSDARG00000009806	0.041105158	1.738002819	0.003530378	34	0.117403329
her4.4	ENSDARG00000009822	0.001425583	2.983344707	0.006185932	94	0.005522632
pou3f1	ENSDARG00000009823	1.14E-34	12.22540466	0.025625089	140	1.25E-33
mmp23bb	ENSDARG00000009825	0.082948885	1.385506097	0.002806296	36	0.215158538
hdlbpa	ENSDARG00000009830	2.81E-29	11.17155527	0.023515235	1700	2.85E-28
agk	ENSDARG00000009837	0.243203395	0.696035195	0.001393484	75	0.516758008
fam117bb	ENSDARG00000009839	2.85E-176	28.28234305	0.059624169	1707	6.86E-175
dusp23a	ENSDARG00000009844	6.88E-29	11.09178104	0.022970662	47	6.94E-28
wdr41	ENSDARG00000009851	0.804045381	-0.856160084	-0.001837532	44	0.833205066
dcps	ENSDARG00000009862	0.527835152	-0.069829086	-0.000206524	71	0.742122183
ddx55	ENSDARG00000009864	0.767511405	-0.730675816	-0.001568357	39	0.807541283
dcaf11	ENSDARG00000009868	0.38208187	0.300017588	0.00055629	25	0.722423235
mapk8b	ENSDARG00000009870	0.003606006	2.686892649	0.005600793	373	0.01310962
snrpc	ENSDARG00000009871	0.780586736	-0.774176324	-0.001667647	46	0.817000234
cyp2k6	ENSDARG00000009874	0.754953081	-0.690159582	-7.02E-05	1	0.798139936
ier5	ENSDARG00000009881	0.066940781	1.498969435	0.003099648	523	0.178242564
sult3st1	ENSDARG00000009885	2.18E-08	5.475254791	0.011459094	200	1.29E-07
rnf114	ENSDARG00000009886	0.630705101	-0.333721401	-0.000731424	13	0.742122183
znf385a	ENSDARG00000009899	0	61.29373562	0.129329589	7691	0
slc38a5a	ENSDARG00000009901	1.63E-08	5.527390972	0.011541924	150	9.66E-08
dmbx1a	ENSDARG00000009922	0.547532171	-0.119428785	-0.000277241	6	0.742122183
cadm2a	ENSDARG00000009930	0	66.83533861	0.140799137	410	0
micu2	ENSDARG00000009939	0.470100621	0.075016929	9.61E-05	65	0.742122183
erc1a	ENSDARG00000009941	0.569623396	-0.17541544	-0.000425652	53	0.742122183
cdc6	ENSDARG00000009942	0.002771961	2.773603446	0.005747005	103	0.010279519
fndc4b	ENSDARG00000009949	0.009561568	2.34312185	0.004862861	155	0.032055454
edf1	ENSDARG00000009950	0.435523442	0.162328867	0.00028042	150	0.742122183
med14	ENSDARG00000009953	0.094095257	1.315950929	0.002708155	220	0.238924624
cbl	ENSDARG00000009958	8.23E-07	4.792717411	0.010048853	827	4.42E-06
rundc3b	ENSDARG00000009961	0.503621404	-0.009077639	-7.95E-05	59	0.742122183
icn	ENSDARG00000009978	0.532245729	-0.080916268	-0.00023052	167	0.742122183
fam199x	ENSDARG00000009982	0.078052416	1.418294395	0.002928362	401	0.203784729
gna11a	ENSDARG00000010002	0.001161977	3.045368355	0.006364576	1080	0.004554332
vim	ENSDARG00000010008	0.051454446	1.630911983	0.003354247	84	0.142282841
trim13	ENSDARG00000010010	9.20E-07	4.770251552	0.009970843	164	4.92E-06
qki2	ENSDARG00000010018	1.70E-62	16.64288128	0.03502706	495	2.45E-61
grpel1	ENSDARG00000010021	0.847404571	-1.025365293	-0.00220451	77	0.867032507
CU856539.1	ENSDARG00000010023	0.000295618	3.435603145	0.007082169	51	0.00125375
spon1a	ENSDARG00000010029	9.23E-09	5.625849854	0.011766554	170	5.54E-08
ssh1b	ENSDARG00000010031	0.71711603	-0.574295374	-0.001236064	30	0.777108824
cmtm7	ENSDARG00000010032	0.602756966	-0.260489688	-0.000577574	11	0.742122183
engase	ENSDARG00000010035	0.126109513	1.144976175	0.002328719	59	0.304620536
dnm1a	ENSDARG00000010042	4.38E-12	6.825583562	0.014280075	152	3.02E-11
neu3.2	ENSDARG00000010047	0.592824769	-0.234817401	-0.000520687	9	0.742122183
ufd1l	ENSDARG00000010051	0.603965864	-0.263625806	-0.000613139	97	0.742122183
ndrg3b	ENSDARG00000010052	1.78E-188	29.25786868	0.061685846	1878	4.45E-187
itpkb	ENSDARG00000010059	4.18E-30	11.33961519	0.023811429	282	4.27E-29
adam9	ENSDARG00000010070	0.808367873	-0.87189758	-0.001898688	522	0.835039336
CR792422.1	ENSDARG00000010075	NA	NA	NA	0	1
nup133	ENSDARG00000010078	0.007990118	2.409366641	0.00498922	104	0.027153186
rbfox3a	ENSDARG00000010083	0	49.12353656	0.103592083	1280	0
p4ha2	ENSDARG00000010085	0.000365515	3.377668838	0.007051768	269	0.001533116
slc1a6	ENSDARG00000010096	0.577158499	-0.194629507	-0.000432587	9	0.742122183
f9a	ENSDARG00000010097	NA	NA	NA	0	1
pank1b	ENSDARG00000010098	0.182243381	0.906848797	0.001847557	213	0.411964869
bri3bp	ENSDARG00000010108	0.002306006	2.83295339	0.005676961	20	0.008654052
ndufb8	ENSDARG00000010113	0.381676228	0.301081357	0.000568644	77	0.721867122
smpdl3b	ENSDARG00000010130	0.657665775	-0.406100921	-0.000885208	20	0.749517244
dacha	ENSDARG00000010132	0	71.43033349	0.150727916	10809	0
ldb1a	ENSDARG00000010137	5.47E-06	4.397906449	0.009213581	658	2.75E-05
plppr3a	ENSDARG00000010144	2.88E-28	10.96290208	0.023069621	1215	2.87E-27
tor4aa	ENSDARG00000010145	0.212495064	0.797793856	0.001613936	118	0.463710256
cpa2	ENSDARG00000010146	0.000394272	3.356785107	0.006948598	64	0.00164653
atp5fa1	ENSDARG00000010149	2.26E-26	10.56078474	0.022218902	928	2.18E-25
vstm4a	ENSDARG00000010154	0.727794201	-0.606155351	-0.001307444	26	0.783894815
abi1a	ENSDARG00000010155	0.024299509	1.97209277	0.004099592	915	0.073923496
rps15a	ENSDARG00000010160	0.770395316	-0.740149366	-0.001619714	359	0.809606118
myd88	ENSDARG00000010169	0.023481054	1.986641786	0.004122437	285	0.071703201
asap2a	ENSDARG00000010181	4.87E-23	9.814578787	0.020653192	2165	4.41E-22
si:ch73-265h17.1	ENSDARG00000010183	0.531073492	-0.077968617	-0.000193823	4	0.742122183
myo3a	ENSDARG00000010186	0	75.65995625	0.159397445	378	0
pax3a	ENSDARG00000010192	8.70E-79	18.75568566	0.039419602	241	1.40E-77
eif4bb	ENSDARG00000010194	1.45E-15	7.894828693	0.016589385	693	1.11E-14
smad3b	ENSDARG00000010207	0.425226887	0.188539474	0.000335797	171	0.742122183
ppm1na	ENSDARG00000010231	0.564426012	-0.162200487	-0.000370329	7	0.742122183
rbm22	ENSDARG00000010238	0.919429219	-1.401242521	-0.003011364	291	0.926514413
rpl22l1	ENSDARG00000010244	0.495292928	0.011799153	-3.58E-05	139	0.742122183
prmt1	ENSDARG00000010246	0.013141523	2.222003841	0.004618532	290	0.042676573
wdr54	ENSDARG00000010248	0.718734854	-0.579087266	-0.001248192	28	0.778216152
nqo1	ENSDARG00000010250	1.60E-305	37.34377525	0.078402766	131	5.30E-304
jak3	ENSDARG00000010252	0.630669349	-0.333626654	-0.000729667	16	0.742122183
bin2b	ENSDARG00000010255	0.130747603	1.122864123	0.00225292	37	0.314065957
igf2bp3	ENSDARG00000010266	2.61E-57	15.91212001	0.033521585	2119	3.58E-56
dpydb	ENSDARG00000010267	7.94E-11	6.396580581	0.013399191	215	5.23E-10
fezf1	ENSDARG00000010270	0.697638178	-0.517619686	-6.78E-05	34	0.766528653
ptgs2b	ENSDARG00000010276	0.679914648	-0.467460141	-0.00101314	32	0.75969535
scamp2	ENSDARG00000010279	0.209969017	0.806528757	0.001633965	156	0.459204137
clasp1a	ENSDARG00000010280	1.10E-06	4.735036668	0.009930995	1402	5.83E-06
xpo4	ENSDARG00000010281	1.64E-21	9.453215939	0.019870006	569	1.45E-20
fmodb	ENSDARG00000010294	0.572029063	-0.181542377	-0.000414545	8	0.742122183
kcnh6b	ENSDARG00000010296	0.6360881	-0.348021817	-0.000759469	14	0.742308817
traf3ip1	ENSDARG00000010300	5.68E-07	4.866433008	0.010197371	468	3.09E-06
b4galt6	ENSDARG00000010301	0.000275574	3.454581025	0.007227105	948	0.001174513
cp	ENSDARG00000010312	0.302361822	0.517619686	-5.33E-05	3	0.604443506
qars1	ENSDARG00000010316	0.197448501	0.850770231	0.001728358	185	0.436541421
gpr183a	ENSDARG00000010317	NA	NA	NA	0	1
srpx	ENSDARG00000010318	2.53E-05	4.053235762	0.008472796	255	0.000120367
radx	ENSDARG00000010331	0.7156495	-0.569965644	-0.001227472	27	0.776232114
zgc:56231	ENSDARG00000010332	0.000188126	3.556204264	0.007391701	95	0.000814949
acer1	ENSDARG00000010347	0.593584557	-0.236775595	-0.000524954	9	0.742122183
c1ql3a	ENSDARG00000010350	0.006767063	2.469396241	0.005073377	49	0.023361706
slc5a3a	ENSDARG00000010376	NA	NA	NA	0	1
rnf2	ENSDARG00000010381	0.207343099	0.815674725	0.001650096	111	0.454397381
lpar5a	ENSDARG00000010384	0.520950974	-0.052540466	-0.000102356	2	0.742122183
sept4a	ENSDARG00000010385	0.754821112	-0.689739888	-0.001482019	34	0.798139936
lrrfip2	ENSDARG00000010400	0.129219961	1.130086157	0.002322782	713	0.310915643
ppp4r4	ENSDARG00000010407	1.78E-06	4.635292045	0.009597951	65	9.35E-06
igsf9b	ENSDARG00000010408	9.21E-18	8.503384266	0.017879942	1039	7.43E-17
epn1	ENSDARG00000010411	0.078896491	1.412533334	0.002918239	671	0.205780997
sirt4	ENSDARG00000010415	0.685580761	-0.483362349	-0.001038415	21	0.763019859
ndrg1b	ENSDARG00000010420	0.519008189	-0.047664506	-0.000141833	3	0.742122183
npsn	ENSDARG00000010423	NA	NA	NA	0	1
scara5	ENSDARG00000010425	0.152155922	1.027230703	0.00206714	41	0.354218767
eaf2	ENSDARG00000010432	0.041461319	1.73397433	0.003572637	103	0.118254734
clu	ENSDARG00000010434	2.33E-10	6.230038453	0.012473732	17	1.51E-09
tent5c	ENSDARG00000010437	0.729066722	-0.609992832	-0.001326327	42	0.784710491
rnf11a	ENSDARG00000010442	0.174279643	0.937387466	0.001898173	64	0.397292527
trabd	ENSDARG00000010445	0.74776835	-0.66748357	-0.001458459	99	0.796290156
guca1a	ENSDARG00000010454	0.557627184	-0.144955975	-0.000325811	8	0.742122183
atp1a2a	ENSDARG00000010472	0.481805197	0.04562343	3.51E-05	96	0.742122183
p2rx3a	ENSDARG00000010477	0.719346513	-0.580901304	-0.001252859	29	0.778615395
hsp90aa1.1	ENSDARG00000010478	3.99E-07	4.935774832	0.010308808	142	2.19E-06
bzw1a	ENSDARG00000010481	0.040664815	1.743022815	0.003608398	244	0.116239058
prg4a	ENSDARG00000010482	1.19E-05	4.226650452	0.008471239	17	5.82E-05
sae1	ENSDARG00000010487	0.004414323	2.618619157	0.005435575	134	0.015780152
cxcr5	ENSDARG00000010514	0.527951703	-0.070121952	-0.00018095	3	0.742122183
dvl1a	ENSDARG00000010515	0.363932531	0.347966873	0.000668826	100	0.696208115
rpl21	ENSDARG00000010516	0.046933508	1.675342676	0.003470704	435	0.131259711
per3	ENSDARG00000010519	8.37E-05	3.763871074	0.007880583	1120	0.000377073
si:ch211-282j22.3	ENSDARG00000010524	0.195227928	0.858790962	0.001742173	134	0.432433289
scamp4	ENSDARG00000010531	0.026084649	1.941734096	0.004003067	92	0.078757611
mmgt1	ENSDARG00000010553	0.510976137	-0.027516568	-0.000116941	31	0.742122183
pdha1b	ENSDARG00000010555	NA	NA	NA	0	1
mmp25b	ENSDARG00000010556	0.548904042	-0.122892891	-0.000280003	5	0.742122183
spopla	ENSDARG00000010563	0.796513759	-0.829233165	-0.0018025	152	0.828678999
aqp4	ENSDARG00000010565	0.577977264	-0.196721516	-0.000447497	9	0.742122183
ezh2	ENSDARG00000010571	2.37E-18	8.659686616	0.018202565	710	1.94E-17
slc25a25a	ENSDARG00000010572	1.38E-06	4.688487261	0.009816236	339	7.28E-06
pard3ab	ENSDARG00000010583	1.85E-24	10.1391955	0.021341866	4272	1.72E-23
tex9	ENSDARG00000010586	1.56E-10	6.293155761	0.012711748	19	1.01E-09
foxn4	ENSDARG00000010591	3.59E-278	35.61875127	0.074376924	72	1.11E-276
slc7a6os	ENSDARG00000010596	0.760688228	-0.708518153	-0.001534044	51	0.802466575
mtmr10	ENSDARG00000010601	0.003609425	2.68657612	0.005602567	442	0.013120206
zgc:112294	ENSDARG00000010602	0.555624472	-0.139884744	-0.000308109	5	0.742122183
kctd9b	ENSDARG00000010603	0.430494049	0.175116493	0.000303902	49	0.742122183
sarm1	ENSDARG00000010610	0.542988594	-0.107965811	-0.000257069	5	0.742122183
themis	ENSDARG00000010619	0.061480839	1.542460712	0.003109479	27	0.165474208
clic2	ENSDARG00000010625	0.543738139	-0.10985582	-0.000271907	7	0.742122183
hoxb6a	ENSDARG00000010630	0.19805101	0.84860339	0.001653679	18	0.437574601
slc20a1b	ENSDARG00000010641	7.50E-15	7.687556964	0.016159415	1221	5.61E-14
arhgap42b	ENSDARG00000010654	0.037791132	1.776914766	0.003686438	645	0.109035881
ppm1k	ENSDARG00000010655	0.131751215	1.118151182	0.002292245	217	0.316300645
insig1	ENSDARG00000010658	0.005575679	2.537919654	0.005286183	331	0.019582947
fbxo36a	ENSDARG00000010662	0.9577722	-1.725398954	-8.48E-05	2	0.960480181
trim16	ENSDARG00000010673	1.05E-30	11.45951711	0.024085077	441	1.09E-29
gngt2a	ENSDARG00000010680	0.557039897	-0.143468476	-0.000318719	7	0.742122183
tjap1	ENSDARG00000010681	3.53E-64	16.87338984	0.035551386	2192	5.15E-63
il17d	ENSDARG00000010700	0.558036392	-0.145992619	-0.000332341	7	0.742122183
crygs4	ENSDARG00000010701	NA	NA	NA	0	1
msi1	ENSDARG00000010710	2.13E-92	20.35431517	0.042895821	2029	3.70E-91
npffr1l3	ENSDARG00000010712	0.549043445	-0.123244979	-0.000291035	6	0.742122183
chchd10	ENSDARG00000010717	0.395260404	0.265634377	0.000480471	20	0.741653915
6-Sep	ENSDARG00000010721	0.226493164	0.750445681	0.001520625	363	0.488127268
ttyh2l	ENSDARG00000010727	2.66E-41	13.40943481	0.028070305	101	3.16E-40
scin	ENSDARG00000010728	0.580644478	-0.203542483	-0.000448581	9	0.742122183
CABZ01073795.1	ENSDARG00000010729	0.513538307	-0.033942019	-0.000111077	2	0.742122183
xrcc4	ENSDARG00000010732	0.773816942	-0.751476206	-0.001641507	212	0.812048323
zgc:101716	ENSDARG00000010738	0.609611036	-0.278305404	-0.000605255	18	0.742122183
dnaja2b	ENSDARG00000010745	0.722663849	-0.590773337	-0.001295587	78	0.780577046
acsl4b	ENSDARG00000010752	0.115589697	1.197326308	0.002464374	729	0.283252739
nod2	ENSDARG00000010756	0.010089868	2.322989126	0.004753716	40	0.033670173
capn12	ENSDARG00000010758	4.07E-82	19.15903556	0.040270457	270	6.67E-81
flj13639	ENSDARG00000010764	0.75530246	-0.691271274	-0.001493851	39	0.7984115
epha4l	ENSDARG00000010767	1.51E-258	34.32784448	0.072386749	1818	4.48E-257
sox19a	ENSDARG00000010770	0.119497464	1.177502682	0.00232264	19	0.29122812
pnpla6	ENSDARG00000010773	1.76E-16	8.154123988	0.017136507	655	1.38E-15
tlk2	ENSDARG00000010779	0.003367536	2.70966737	0.005651833	520	0.012296183
zgc:55621	ENSDARG00000010782	NA	NA	NA	0	1
ppp1r12a	ENSDARG00000010784	5.13E-07	4.886571521	0.010253144	2657	2.79E-06
thbs1b	ENSDARG00000010785	0	45.82519027	0.096630358	1109	0
homer3b	ENSDARG00000010789	4.23E-07	4.924654773	0.01032992	1177	2.32E-06
dla	ENSDARG00000010791	0	70.28338463	0.148227401	1107	0
cdc25b	ENSDARG00000010792	0.002061687	2.868565805	0.005979811	304	0.007773584
tfeb	ENSDARG00000010794	1.39E-42	13.62653555	0.028603577	199	1.68E-41
slc7a14a	ENSDARG00000010816	0.126725917	1.14200526	0.002317829	60	0.305824162
memo1	ENSDARG00000010823	0.012441701	2.243208047	0.004670156	649	0.040617341
churc1	ENSDARG00000010831	0.617572086	-0.299110379	-0.000658912	12	0.742122183
fshb	ENSDARG00000010841	0.56849345	-0.172539895	-6.30E-05	1	0.742122183
kras	ENSDARG00000010844	0.062484869	1.534243588	0.003171392	350	0.167815938
amt	ENSDARG00000010862	0.715392161	-0.569206991	-0.001224303	25	0.776172852
DDX17	ENSDARG00000010873	0.023669158	1.983260698	0.004122105	698	0.072197778
cdkn1ca	ENSDARG00000010878	0.551878317	-0.130408344	-0.000334316	120	0.742122183
mettl13	ENSDARG00000010905	0.652679249	-0.392564041	-0.000857804	16	0.748101397
nprl3	ENSDARG00000010918	0.386730129	0.287851704	0.000544427	160	0.729241606
HTRA3	ENSDARG00000010925	0.571289169	-0.179657244	-0.000404032	7	0.742122183
cacna1fa	ENSDARG00000010933	0.652702374	-0.392626652	-0.000856001	16	0.748101397
syt14a	ENSDARG00000010934	0.515842827	-0.039722523	-0.000143951	128	0.742122183
abcb4	ENSDARG00000010936	0.588352713	-0.223309577	-0.000490828	10	0.742122183
BX957278.1	ENSDARG00000010940	0.589782982	-0.226986761	-0.000504157	13	0.742122183
pomgnt2	ENSDARG00000010941	0.747699514	-0.667267987	-0.001446836	51	0.796290156
rapgef6	ENSDARG00000010945	0.047904537	1.665519919	0.003435345	142	0.133715423
cbsb	ENSDARG00000010946	0.000374317	3.371119598	0.007044197	417	0.001567493
kif11	ENSDARG00000010948	0.000163986	3.592140586	0.007492953	180	0.000716009
ndel1a	ENSDARG00000010953	0.015330241	2.161451463	0.004472139	104	0.04902799
sh3glb1b	ENSDARG00000010956	0.527655281	-0.069377122	-0.000206836	590	0.742122183
mpp2b	ENSDARG00000010957	0.002432881	2.815788948	0.005822648	71	0.009084533
glmnb	ENSDARG00000010958	0.542491899	-0.106713588	-0.000241432	4	0.742122183
fkbp7	ENSDARG00000010962	0.621301707	-0.30890133	-0.000694661	30	0.742122183
psma8	ENSDARG00000010965	0.300391709	0.523274249	0.001040079	192	0.604443506
rab34b	ENSDARG00000010977	1.22E-24	10.1801451	0.019279001	13	1.13E-23
trmt1	ENSDARG00000010978	0.935923284	-1.521424152	-0.003237555	69	0.941742798
zdhhc3a	ENSDARG00000010981	0.076188365	1.431186644	0.002941191	114	0.19950133
gtf2a1	ENSDARG00000011000	0.377463633	0.312149031	0.000596961	322	0.715310575
hnrnpa1a	ENSDARG00000011020	1.00E-06	4.753469275	0.009968522	1115	5.34E-06
pdlim3a	ENSDARG00000011023	0.705045301	-0.538967328	-0.001167519	28	0.770352067
zgc:92907	ENSDARG00000011026	0.619921224	-0.305273901	-0.000670261	12	0.742122183
fgfr1a	ENSDARG00000011027	1.09E-241	33.1786292	0.069967729	2528	3.10E-240
pgbd5	ENSDARG00000011042	0.037358433	1.78219851	0.003513187	16	0.107907691
slc17a9b	ENSDARG00000011049	1.53E-05	4.168858431	0.008724735	382	7.44E-05
fbxo9	ENSDARG00000011055	0.663900328	-0.42313147	-0.000951275	238	0.75225843
camk2b1	ENSDARG00000011065	3.55E-142	25.3592598	0.053438728	1015	7.64E-141
glra3	ENSDARG00000011066	0	53.05745295	0.111332515	122	0
ddx11	ENSDARG00000011072	0.080983176	1.398488737	0.002880917	209	0.210650633
zgc:91968	ENSDARG00000011076	0.107459854	1.240150568	0.002501363	31	0.267533706
wdr3	ENSDARG00000011079	0.218557997	0.777072504	0.00156992	127	0.474262795
si:dkey-42l23.2	ENSDARG00000011083	NA	NA	NA	0	1
si:ch211-288d18.1	ENSDARG00000011088	2.15E-07	5.055114247	0.010591434	367	1.20E-06
drd2b	ENSDARG00000011091	1.66E-24	10.14976657	0.021195418	87	1.55E-23
ccna2	ENSDARG00000011094	1.80E-07	5.088462765	0.0106442	209	1.01E-06
chrna10a	ENSDARG00000011113	0.593850707	-0.237461755	-0.000526172	10	0.742122183
pptc7a	ENSDARG00000011122	9.57E-28	10.85375155	0.022839341	1076	9.46E-27
snrpb	ENSDARG00000011125	0.001781445	2.914473556	0.006075923	270	0.006784111
dpysl5a	ENSDARG00000011141	7.40E-27	10.66524276	0.02238049	212	7.20E-26
uqcrb	ENSDARG00000011146	0.565528914	-0.165002299	-0.000368578	7	0.742122183
rpp14	ENSDARG00000011152	0.65266139	-0.39251569	-0.000856397	19	0.748101397
arhgef18a	ENSDARG00000011157	0.018305351	2.090079019	0.004346589	648	0.057422116
sema3fa	ENSDARG00000011163	0	42.24490307	0.089079278	1238	0
cahz	ENSDARG00000011166	1.16E-136	24.85424092	0.052285556	276	2.46E-135
ndrg2	ENSDARG00000011170	1.24E-108	22.11101775	0.046602818	1821	2.33E-107
si:ch211-12m10.1	ENSDARG00000011171	6.14E-60	16.28661247	0.034257362	381	8.64E-59
atp6v1d	ENSDARG00000011175	0.000470489	3.30760404	0.006739689	27	0.001949415
acvr2aa	ENSDARG00000011188	3.63E-11	6.515383724	0.013686129	1115	2.42E-10
fgfr1b	ENSDARG00000011190	1.45E-46	14.2804609	0.030081118	2819	1.82E-45
dnajc11a	ENSDARG00000011196	0.12213636	1.164373407	0.002373478	82	0.296600509
rplp2l	ENSDARG00000011201	2.49E-06	4.565739223	0.009565353	544	1.29E-05
akt2	ENSDARG00000011219	0.370524884	0.3304635	0.000636333	653	0.704223027
ccdc28b	ENSDARG00000011222	0.251263213	0.670519897	0.001340446	69	0.527204791
pcyt1aa	ENSDARG00000011233	0.141240759	1.074761507	0.002180559	56	0.334737367
otx2b	ENSDARG00000011235	0.63852961	-0.354531262	-0.000774044	14	0.742887475
ppp1r14aa	ENSDARG00000011239	0.598008084	-0.248194615	-0.000550804	13	0.742122183
ift46	ENSDARG00000011240	0.423895263	0.191938314	0.000341287	90	0.742122183
esrp1	ENSDARG00000011245	8.35E-287	36.17214847	0.076270787	1560	2.64E-285
krr1	ENSDARG00000011246	0.660801811	-0.414652407	-0.000914483	29	0.750868375
rnpc3	ENSDARG00000011247	0.002996779	2.748133568	0.005722764	228	0.011037356
enpp2	ENSDARG00000011257	0.815455222	-0.898180072	-0.001923307	43	0.840583112
trpm1a	ENSDARG00000011259	0.000373841	3.371469757	0.006787577	22	0.001565755
traip	ENSDARG00000011262	0.228147403	0.744961813	0.001448328	20	0.490914872
uqcc2	ENSDARG00000011272	0.245803475	0.687755205	0.001360072	32	0.518142438
tlx2	ENSDARG00000011273	0.662063423	-0.418101164	-0.000910329	18	0.751464428
si:dkey-110k5.10	ENSDARG00000011283	0.514881938	-0.037312141	-0.000116069	4	0.742122183
atf7a	ENSDARG00000011298	0.000496418	3.292548757	0.006883682	730	0.002050036
blzf1	ENSDARG00000011299	0.116695358	1.191669873	0.00239652	32	0.285583762
nae1	ENSDARG00000011301	0.100556332	1.27838797	0.002603023	54	0.25265893
stk3	ENSDARG00000011312	0.874577017	-1.148297028	-0.00246466	97	0.889032552
adra1ba	ENSDARG00000011317	0.577584637	-0.195718216	-0.000437994	9	0.742122183
ankrd45	ENSDARG00000011326	0.592212812	-0.233240863	-0.000549747	107	0.742122183
arhgap33	ENSDARG00000011333	4.68E-12	6.8158969	0.014320375	1225	3.23E-11
ncaldb	ENSDARG00000011334	2.10E-05	4.096275538	0.008512628	142	0.000100748
nfatc2ip	ENSDARG00000011360	0.369828976	0.332306341	0.000635521	94	0.702951979
fyna	ENSDARG00000011370	0.064554779	1.517622633	0.003107019	68	0.172724226
zgc:64106	ENSDARG00000011371	0.68192851	-0.473098399	-0.001022167	20	0.761035389
mknk2a	ENSDARG00000011373	8.39E-05	3.763065162	0.007816619	89	0.000378159
dnase1l4.2	ENSDARG00000011376	0.222300981	0.764445232	0.001539101	104	0.480853551
tnnc1a	ENSDARG00000011400	0.523745113	-0.059555359	-0.000159342	4	0.742122183
fen1	ENSDARG00000011404	0.12041409	1.172919273	0.002396645	103	0.293105351
rps9	ENSDARG00000011405	0.003052344	2.742104741	0.005723089	753	0.011234013
col2a1b	ENSDARG00000011407	0	54.1663228	0.114223755	1126	0
aadat	ENSDARG00000011410	0.894401808	-1.250282458	-0.002664887	50	0.904603578
sigmar1	ENSDARG00000011418	0.367093111	0.339562234	0.000644554	48	0.699086117
ryr1a	ENSDARG00000011422	0.241773954	0.700607642	0.001411711	155	0.514676578
ptger2a	ENSDARG00000011434	0.054321506	1.604322373	0.003218146	28	0.149324158
elmsan1a	ENSDARG00000011445	0.304430899	0.511698839	0.000997466	33	0.607922632
fes	ENSDARG00000011449	9.41E-63	16.67837859	0.035041569	225	1.36E-61
gsna	ENSDARG00000011459	0.02837062	1.905298815	0.003924493	89	0.084667138
otub1b	ENSDARG00000011462	0.563657929	-0.160250003	-0.000391513	40	0.742122183
CABZ01044048.1	ENSDARG00000011463	0.288432688	0.55796926	0.001081279	24	0.587993004
afg1la	ENSDARG00000011466	3.85E-05	3.953320336	0.008248093	155	0.000180271
calcrla	ENSDARG00000011473	0	46.96085748	0.098873919	344	0
gnaq	ENSDARG00000011487	0.539871386	-0.100109709	-0.000237785	4	0.742122183
sirt2	ENSDARG00000011488	0.464166012	0.089943612	0.000128342	145	0.742122183
scube3	ENSDARG00000011490	8.19E-23	9.762085927	0.02053392	1106	7.38E-22
dcun1d3	ENSDARG00000011493	0.628537852	-0.327983291	-0.000745484	64	0.742122183
ppm1bb	ENSDARG00000011496	8.39E-05	3.763082901	0.007880314	1547	0.000378159
si:ch211-212o1.2	ENSDARG00000011498	6.28E-13	7.09908132	0.014900199	389	4.45E-12
lpcat1	ENSDARG00000011506	2.65E-09	5.837255563	0.012247108	573	1.64E-08
rcc2	ENSDARG00000011510	0.000319972	3.414094655	0.007122663	214	0.001351282
orai1a	ENSDARG00000011515	0.014470032	2.184302011	0.004395297	25	0.046535593
myl4	ENSDARG00000011519	0.589180121	-0.225436451	-0.00050029	9	0.742122183
upb1	ENSDARG00000011521	0.642953462	-0.36636454	-0.00081641	31	0.744632648
sema6dl	ENSDARG00000011533	4.23E-20	9.107026319	0.019157738	1586	3.64E-19
ugt2a5	ENSDARG00000011537	0.534936632	-0.087685385	-0.000241887	33	0.742122183
arrb2b	ENSDARG00000011545	0.001988881	2.879919979	0.006015566	1140	0.00751857
c1ql4a	ENSDARG00000011549	0.596065542	-0.243176183	-0.00053795	10	0.742122183
atp5pb	ENSDARG00000011553	0.008496862	2.38684351	0.004958237	178	0.02875075
spag7	ENSDARG00000011555	0.375421803	0.317527196	0.000600941	56	0.711962304
sfpq	ENSDARG00000011564	1.16E-17	8.476833195	0.017833716	6587	9.32E-17
pou6f1	ENSDARG00000011570	0.023643685	1.983717238	0.004113426	232	0.072140267
calcrlb	ENSDARG00000011571	0.623182457	-0.313849842	-0.000691469	15	0.742122183
abcb11a	ENSDARG00000011573	0.632770535	-0.339200185	-0.000740262	13	0.742122183
hoxb10a	ENSDARG00000011579	0.550484709	-0.126886056	-0.000293056	5	0.742122183
si:dkey-23k10.5	ENSDARG00000011581	0.6687291	-0.436406532	-0.000945845	22	0.754645462
sox5	ENSDARG00000011582	0	47.44797184	0.100083231	2288	0
cry1b	ENSDARG00000011583	0.001213876	3.032203882	0.006252997	55	0.004748402
smarcb1b	ENSDARG00000011594	3.30E-05	3.990081418	0.008338483	245	0.000155499
atxn2l	ENSDARG00000011597	0.015065453	2.16836526	0.004511831	610	0.048264627
epha4b	ENSDARG00000011600	0	65.75290875	0.138713592	2049	0
CRACD	ENSDARG00000011602	2.82E-24	10.09793143	0.021196845	236	2.61E-23
dennd6b	ENSDARG00000011605	0.675672785	-0.455632276	-0.000986507	16	0.757682361
FOXK2	ENSDARG00000011609	9.42E-11	6.370444611	0.013380331	1188	6.18E-10
actr1	ENSDARG00000011611	0.2583591	0.648412481	0.001305046	302	0.53842835
rbm39a	ENSDARG00000011613	0.512012689	-0.030115897	-0.00012398	316	0.742122183
mybpc3	ENSDARG00000011615	0.666346956	-0.429848172	-0.000960272	82	0.753803538
slc26a2	ENSDARG00000011618	0.175530917	0.932531659	0.001895934	114	0.399687494
scxb	ENSDARG00000011635	0.548000067	-0.120610102	-0.000269848	4	0.742122183
syt5b	ENSDARG00000011640	0.598395814	-0.249197036	-0.000549228	11	0.742122183
snrpd1	ENSDARG00000011648	0.05056882	1.639363207	0.003369429	84	0.140124987
ftr52p	ENSDARG00000011652	0.422014966	0.196741374	0.000341505	28	0.742122183
twf1b	ENSDARG00000011661	0.134863119	1.103693221	0.002248834	80	0.322634747
chuk	ENSDARG00000011662	0.572716986	-0.183295675	-0.000445239	128	0.742122183
aldoaa	ENSDARG00000011665	0.655778132	-0.40096793	-0.000905121	319	0.748659947
pde6b	ENSDARG00000011671	0.675014251	-0.453801786	-0.000983547	20	0.757354465
sema3b	ENSDARG00000011672	3.22E-28	10.95283117	0.022958927	203	3.20E-27
si:ch211-246m6.5	ENSDARG00000011673	2.69E-127	23.97249376	0.049976957	63	5.48E-126
prtfdc1	ENSDARG00000011683	0.248642356	0.678768254	0.001370302	464	0.523019569
ttc36	ENSDARG00000011693	0.676937355	-0.45915162	-0.000996248	22	0.758057929
esrrgb	ENSDARG00000011696	0.248623623	0.678827377	0.001360846	81	0.523019569
ctsll	ENSDARG00000011701	0.525320514	-0.063511789	-0.000165195	3	0.742122183
clocka	ENSDARG00000011703	2.55E-08	5.447842005	0.011434115	1226	1.50E-07
C2H5orf22	ENSDARG00000011723	0.699345623	-0.522519384	-0.001123482	24	0.767492768
marveld1	ENSDARG00000011724	0.801945645	-0.848591372	-0.001816466	36	0.833205066
b9d1	ENSDARG00000011727	0.065009143	1.514029783	0.003075059	40	0.173832152
u2af2b	ENSDARG00000011740	0.005847578	2.521211447	0.005255945	610	0.020468498
pigo	ENSDARG00000011743	0.186920454	0.889301793	0.001783697	41	0.420335626
ints13	ENSDARG00000011764	0.15886745	0.999123434	0.002009603	47	0.367497188
cpm	ENSDARG00000011769	0.119007471	1.179962972	0.002420269	172	0.290336516
dhrs12	ENSDARG00000011770	0.619526116	-0.304236436	-0.000660751	26	0.742122183
cttn	ENSDARG00000011777	0.061257426	1.544303388	0.003162256	66	0.164958635
stag2a	ENSDARG00000011783	0.015812002	2.149131173	0.004459279	209	0.050388227
tbx6	ENSDARG00000011785	0.591955336	-0.232577722	-0.000518958	12	0.742122183
tent5bb	ENSDARG00000011797	1.54E-159	26.88732618	0.05664401	605	3.51E-158
wars2	ENSDARG00000011801	0.330792868	0.437724874	0.000854929	77	0.649423956
mical1	ENSDARG00000011809	0.588832933	-0.22454387	-0.000532743	188	0.742122183
batf	ENSDARG00000011818	0.768670689	-0.7344761	-0.001595641	74	0.808351468
pcnx1	ENSDARG00000011819	0.000603767	3.237094622	0.006767338	807	0.002468846
plod2	ENSDARG00000011821	7.66E-05	3.785856527	0.007876014	108	0.000347419
pbxip1b	ENSDARG00000011824	0.741307561	-0.647381791	-0.001420788	159	0.792450162
cetn3	ENSDARG00000011825	0.856433523	-1.064432199	-0.002281581	69	0.872816531
C13H9orf72	ENSDARG00000011837	0.527485976	-0.068951722	-0.000201685	32	0.742122183
atp5l	ENSDARG00000011841	0.227368907	0.747539757	0.00149885	67	0.489525672
[truncated: 30,032 more rows]
