# Supplementary material for: Single-cell transcriptomic profiling of the zebrafish inner ear reveals molecularly distinct hair cell and supporting cell subtypes
Source: eLife. 2023 Jan 4;12:e82978. doi: 10.7554/eLife.82978 (PMC9851615; doi:10.7554/eLife.82978)
Supplement: Supplementary file 2. [file elife-82978-supp2.csv]

	id	morans_I	module	supermodule	dim_1	dim_2	p_value	morans_test_statistic	gene_short_name	num_cells_expressed	q_value
1	ENSDARG00000000103	0.036544587	2	1	1.711427369	-2.442414684	1.08E-67	17.3447088	myh10	2018	1.61E-66
2	ENSDARG00000000161	0.082558283	1	1	-2.07832285	-2.911674065	0	39.15374041	itsn2a	1339	0
3	ENSDARG00000000370	0.087316966	5	2	-2.680407963	5.346463876	0	41.41697436	triob	1063	0
4	ENSDARG00000000563	0.10821688	18	4	18.14671449	-3.397521539	0	51.29404896	ttn.1	6031	0
5	ENSDARG00000000606	0.111770985	3	2	0.192608968	6.035042958	0	53.01053214	dnah6	918	0
6	ENSDARG00000000796	0.038184268	13	1	2.428072729	-3.873110576	8.18E-74	18.1367175	nr4a1	686	1.27E-72
7	ENSDARG00000000804	0.032685319	11	1	-0.184859745	-4.053432031	5.71E-55	15.57123891	rassf6	396	7.69E-54
8	ENSDARG00000000966	0.035978583	6	1	-2.850559912	-5.650868697	1.18E-65	17.07296393	ncor2	4749	1.74E-64
9	ENSDARG00000001014	0.095178383	13	1	0.700832792	-3.808576627	0	45.11921049	myh9b	4158	0
10	ENSDARG00000001154	0.132374275	3	2	-1.05310484	5.987810807	0	62.84875789	rimbp2	343	0
11	ENSDARG00000001559	0.057444545	9	1	3.000070609	-1.893682821	3.84E-164	27.27827129	csmd2	471	8.89E-163
12	ENSDARG00000001634	0.064016651	2	1	0.794908502	-2.36473803	9.11E-203	30.36058499	kirrel1a	2313	2.36E-201
13	ENSDARG00000001721	0.339500619	2	1	0.624041833	-1.389908774	0	160.9020559	oc90	1552	0
14	ENSDARG00000001807	0.21966973	14	1	4.906927385	-2.439497156	0	104.2088033	tnfrsf21	533	0
15	ENSDARG00000001870	0.200044267	14	1	4.782131471	-2.436468286	0	94.89981603	atp1a1a.4	528	0
16	ENSDARG00000001889	0.03739169	8	2	-0.57748314	6.716773229	1.61E-71	17.84413405	tuba1a	125	2.46E-70
17	ENSDARG00000001891	0.054733614	8	2	-0.892002903	6.651083188	2.98E-150	26.08114848	syt14b	130	6.55E-149
18	ENSDARG00000001968	0.053609376	11	1	-0.1870284	-4.429012818	2.79E-143	25.45921576	dock5	659	6.02E-142
19	ENSDARG00000001999	0.033670833	6	1	-3.939999781	-5.009506507	3.88E-58	16.03098126	adamts18	259	5.37E-57
20	ENSDARG00000002013	0.041701674	2	1	1.006479062	-1.161095275	1.86E-87	19.7886933	grb10a	1883	3.14E-86
21	ENSDARG00000002026	0.080432201	4	1	2.512424507	0.135636287	0	38.13874519	qkib	2107	0
22	ENSDARG00000002131	0.064278567	17	3	-3.249028407	0.858359294	2.10E-204	30.48438185	celf2	2311	5.49E-203
23	ENSDARG00000002167	0.03585988	10	2	0.556293972	4.087974744	1.96E-65	17.04318648	cacnb1	402	2.88E-64
24	ENSDARG00000002210	0.040275149	10	2	0.32995186	3.762090879	1.40E-82	19.21438404	stk25a	121	2.31E-81
25	ENSDARG00000002231	0.129594909	9	1	2.779770412	-2.054838819	0	61.43053938	plpp2a	2438	0
26	ENSDARG00000002587	0.092080016	3	2	-0.571717523	5.351486402	0	43.72923155	dpysl3	337	0
27	ENSDARG00000002600	0.061059223	5	2	-3.02094575	5.690489488	5.33E-189	29.29909258	pcsk1	52	1.33E-187
28	ENSDARG00000002656	0.103431062	10	2	0.528949507	3.330877023	0	49.10086725	stxbp5a	403	0
29	ENSDARG00000002847	0.142362495	6	1	-3.474037133	-4.91778974	0	67.60020103	fndc1	306	0
30	ENSDARG00000002909	0.035032274	13	1	1.486025252	-3.356802268	2.18E-62	16.62820479	tjp3	2155	3.13E-61
31	ENSDARG00000002937	0.157331528	6	1	-2.87473341	-4.755407138	0	74.58365775	meis1a	1600	0
32	ENSDARG00000003008	0.090887927	6	1	-2.735790454	-4.969098372	0	43.08963793	prkcea	2784	0
33	ENSDARG00000003142	0.069020085	9	1	3.102997341	-1.862048132	2.23E-235	32.73823804	dachc	1248	6.23E-234
34	ENSDARG00000003165	0.049290022	7	1	-1.856187544	-4.630846066	2.38E-121	23.39538038	nr2f6b	867	4.75E-120
35	ENSDARG00000003169	0.046749653	2	1	1.28408245	-2.365448756	2.82E-109	22.1776546	magi1b	2993	5.33E-108
36	ENSDARG00000003193	0.043269058	2	1	1.04673449	-2.91522531	6.23E-94	20.52663593	rassf7b	5058	1.09E-92
37	ENSDARG00000003381	0.08511623	1	1	-2.32770773	-2.770423455	0	40.39723541	si:ch211-266g18.6	550	0
38	ENSDARG00000003449	0.133629235	13	1	2.759349861	-3.95633225	0	63.39554132	pde10a	633	0
39	ENSDARG00000003495	0.044222933	3	2	-0.410155557	6.737145619	4.01E-98	20.99049492	madd	969	7.17E-97
40	ENSDARG00000003544	0.078919212	4	1	2.551068105	0.687411265	1.05E-306	37.41659521	adarb1b	4165	3.49E-305
41	ENSDARG00000003570	0.045248981	1	1	-2.967233382	-2.353852196	1.40E-102	21.47286647	hsp90b1	1237	2.56E-101
42	ENSDARG00000003680	0.198423357	2	1	0.718026735	-0.166184945	0	94.05682854	runx1t1	1472	0
43	ENSDARG00000003803	0.035847817	10	2	0.511297651	3.984743314	4.09E-66	17.13473413	LHX3	90	6.03E-65
44	ENSDARG00000003963	0.043314498	2	1	1.163858094	-1.516911907	3.66E-94	20.55245867	traf4a	1960	6.43E-93
45	ENSDARG00000003989	0.101272423	1	1	-1.62937399	-2.278142972	0	48.05323858	crhr1	975	0
46	ENSDARG00000004018	0.044448008	13	1	2.596715965	-4.021643205	4.69E-99	21.09215195	CHST13	1432	8.48E-98
47	ENSDARG00000004055	0.036260407	5	2	-1.267534576	5.283448415	7.95E-67	17.2296701	uhrf1bp1l	487	1.18E-65
48	ENSDARG00000004074	0.081637814	7	1	-1.767225466	-4.369536681	0	38.70376176	bach2b	4250	0
49	ENSDARG00000004115	0.350271162	4	1	1.395658531	-0.436927719	0	165.9569883	mgat4b	7316	0
50	ENSDARG00000004184	0.044778551	4	1	1.67845694	-0.580794914	1.83E-100	21.24521599	nf1b	2192	3.31E-99
51	ENSDARG00000004196	0.093043807	9	1	3.177067079	-1.680907829	0	44.13635801	tnfsf10l	956	0
52	ENSDARG00000004218	0.050800957	13	1	2.509068288	-3.918429894	8.43E-129	24.11630985	rnd1b	652	1.73E-127
53	ENSDARG00000004232	0.116069376	10	2	0.473713152	2.993208604	0	55.0937536	dlb	460	0
54	ENSDARG00000004246	0.040586115	7	1	-0.598676644	-4.656635804	5.50E-83	19.26295996	slit2	1446	9.07E-82
55	ENSDARG00000004305	0.082915142	7	1	-2.452375374	-5.884472651	0	39.35100721	vangl1	519	0
56	ENSDARG00000004307	0.059622237	2	1	1.019702413	-1.904003067	2.06E-176	28.29373416	lypd6	808	4.97E-175
57	ENSDARG00000004363	0.052273792	9	1	2.789375104	-1.820090873	3.96E-136	24.8049929	lhfpl6	1044	8.36E-135
58	ENSDARG00000004415	0.144853984	1	1	-1.820866309	-3.41543941	0	68.65288707	tcf7l2	4080	0
59	ENSDARG00000004451	0.081747513	1	1	-1.412163101	-3.365968032	0	38.7544826	tnfrsfa	5910	0
60	ENSDARG00000004635	0.15390323	7	1	-1.496913872	-4.815258069	0	72.93521932	epha7	6652	0
61	ENSDARG00000004672	0.033657941	4	1	1.817185916	-0.903505668	9.39E-58	15.97598113	ptk2ab	2348	1.29E-56
62	ENSDARG00000004714	0.064518294	16	1	3.99932126	-4.376755042	6.92E-206	30.59601084	tcf12	2948	1.82E-204
63	ENSDARG00000004932	0.073694137	9	1	3.157248296	-1.809326811	5.39E-268	34.95524496	anos1b	1419	1.64E-266
64	ENSDARG00000004988	0.067126916	12	2	-2.37301775	3.712446885	1.61E-223	31.89410159	ppp3ca	314	4.42E-222
65	ENSDARG00000005026	0.06346466	6	1	-4.022683821	-5.142057223	2.41E-199	30.1002317	tshz1	1971	6.18E-198
66	ENSDARG00000005162	0.036954097	13	1	0.710283257	-3.649924321	3.81E-69	17.53599056	tpm3	3741	5.73E-68
67	ENSDARG00000005210	0.048164922	7	1	-2.2652454	-5.227523131	2.01E-116	22.90635612	coro2a	252	3.91E-115
68	ENSDARG00000005368	0.034728399	9	1	2.596558132	-1.502523107	1.33E-61	16.51951769	mcamb	264	1.89E-60
69	ENSDARG00000005476	0.065222176	7	1	-1.855849944	-5.456466956	1.83E-210	30.93828327	nav3	1360	4.83E-209
70	ENSDARG00000005479	0.100810771	9	1	2.623417653	-2.751508517	0	47.78813477	tenm3	3647	0
71	ENSDARG00000005482	0.049146034	3	2	0.14015507	6.319255071	1.68E-120	23.31180045	rapgef2	3630	3.35E-119
72	ENSDARG00000005485	0.042160016	9	1	3.025007286	-3.257990403	5.09E-91	20.19807358	ucmab	73	8.81E-90
73	ENSDARG00000005559	0.060559104	8	2	-1.06797608	6.845204549	2.38E-184	28.93170438	pou4f1	81	5.90E-183
74	ENSDARG00000005595	0.043025922	10	2	0.309027091	4.315699773	1.88E-93	20.47282177	adgb	216	3.30E-92
75	ENSDARG00000005645	0.122319359	7	1	-1.715859137	-5.317087932	0	57.97689651	robo3	4211	0
76	ENSDARG00000005652	0.103551682	9	1	3.054421462	-1.684811993	0	49.08698723	man1a1	3544	0
77	ENSDARG00000005673	0.053672893	13	1	2.578184642	-3.671778245	2.25E-143	25.46764021	f3b	1161	4.87E-142
78	ENSDARG00000005754	0.107797816	6	1	-3.466500722	-5.140198989	0	51.09361211	ptprfb	11115	0
79	ENSDARG00000005762	0.249574272	11	1	-0.368522964	-3.98091249	0	118.2664863	col14a1a	4341	0
80	ENSDARG00000005775	0.093560923	5	2	-1.760844193	5.334345536	0	44.43194069	scn8aa	333	0
81	ENSDARG00000005783	0.262408284	5	2	-1.734929047	5.723399358	0	124.4523137	ncanb	618	0
82	ENSDARG00000005861	0.032600361	7	1	-2.246561728	-6.222173972	2.64E-54	15.47303057	ralgapa2	3999	3.54E-53
83	ENSDARG00000006060	0.083740523	4	1	1.675717272	-0.086048646	0	39.70881061	crybg1b	1869	0
84	ENSDARG00000006065	0.210550951	8	2	-0.34089943	7.416923719	0	99.7983532	znf385b	1856	0
85	ENSDARG00000006120	0.039458208	2	1	0.660341569	-0.450279755	1.33E-78	18.73296037	tbx2b	837	2.14E-77
86	ENSDARG00000006200	0.035035549	15	1	-0.887393437	-0.260498865	2.19E-62	16.62787706	eif4g1a	2891	3.15E-61
87	ENSDARG00000006206	0.027067144	8	2	-1.565465413	7.643758969	4.54E-91	20.2037504	pou4f3	3	7.86E-90
88	ENSDARG00000006207	0.03193159	3	2	-0.102845661	6.783160882	9.84E-53	15.23833592	gpx1b	119	1.30E-51
89	ENSDARG00000006288	0.042188418	16	1	3.949786462	-4.286239667	1.59E-89	20.02724145	prdm5	895	2.72E-88
90	ENSDARG00000006292	0.077619455	3	2	0.20455128	6.030811982	5.92E-299	36.93684381	maats1	169	1.93E-297
91	ENSDARG00000006301	0.198661428	6	1	-3.119458638	-4.796012683	0	94.14319672	wu:fj59g11	4113	0
92	ENSDARG00000006353	0.148948032	2	1	0.937916316	-0.114365024	0	70.60022443	itga5	2288	0
93	ENSDARG00000006383	0.173352903	5	2	-2.445854388	5.238165097	0	82.26351187	stxbp5l	445	0
94	ENSDARG00000006385	0.03753217	12	2	-1.755501233	3.262882905	4.38E-72	17.91656379	triobpb	108	6.72E-71
95	ENSDARG00000006508	0.082268466	1	1	-2.610873662	-3.296115203	0	39.01919678	pip5k1bb	1095	0
96	ENSDARG00000006601	0.080418585	1	1	-1.708852373	-3.272611422	0	38.12898777	kaznb	3181	0
97	ENSDARG00000006683	0.07062994	10	2	0.554835178	3.289231496	2.17E-246	33.50317033	arhgef6	1167	6.22E-245
98	ENSDARG00000006747	0.347639068	10	2	0.569400944	4.213356214	0	164.7777844	tmem178b	1283	0
99	ENSDARG00000006754	0.12745143	10	2	0.195704408	4.54408999	0	60.42103073	mllt3	1778	0
100	ENSDARG00000006760	0.218794532	3	2	0.580789037	7.059848504	0	103.9407515	slc24a3	262	0
101	ENSDARG00000006766	0.056736149	16	1	4.031646766	-4.193947358	9.38E-160	26.90583428	snd1	6094	2.14E-158
102	ENSDARG00000006786	0.039036317	1	1	-2.720590315	-2.870879097	3.93E-77	18.55192787	copz2	368	6.25E-76
103	ENSDARG00000006832	0.213455589	5	2	-2.277503214	5.144985395	0	101.3417119	galnt9	331	0
104	ENSDARG00000006865	0.139678155	7	1	-1.908548556	-5.558422847	0	66.23654083	glra4a	884	0
105	ENSDARG00000006889	0.133772755	2	1	1.659250178	-1.774417086	0	63.41370731	mpped2a	2254	0
106	ENSDARG00000006892	0.539720593	5	2	-1.553685508	5.35092278	0	255.8521524	myo3b	912	0
107	ENSDARG00000006911	0.037240099	7	1	-1.413694344	-4.830680175	1.05E-72	17.99594174	wnt8b	44	1.61E-71
108	ENSDARG00000006923	0.041513086	12	2	-2.140927754	3.067374902	1.69E-87	19.79368439	cacna1ab	144	2.85E-86
109	ENSDARG00000007172	0.140047315	2	1	0.6784947	-0.783452956	0	66.37246193	plxna3	5882	0
110	ENSDARG00000007179	0.103513815	6	1	-3.654212199	-4.931791587	0	49.07590901	sash1a	2075	0
111	ENSDARG00000007184	0.347819677	2	1	0.552494891	-0.948183695	0	164.7996417	zbtb16a	5640	0
112	ENSDARG00000007219	0.054247264	11	1	-0.164351873	-4.548203988	2.68E-146	25.73022355	actn1	2884	5.83E-145
113	ENSDARG00000007220	0.262194259	4	1	1.576848664	-0.865308279	0	124.2381225	ncam1b	4709	0
114	ENSDARG00000007231	0.034696124	4	1	1.602808632	-0.855976762	3.20E-61	16.46638859	ryk	3321	4.54E-60
115	ENSDARG00000007278	0.032445161	15	1	-0.514508865	0.871636944	7.08E-54	15.40937198	ect2	904	9.46E-53
116	ENSDARG00000007369	0.077381591	4	1	2.23102931	0.744361477	5.62E-295	36.68825657	tcf7l1b	3847	1.82E-293
117	ENSDARG00000007398	0.034614431	17	3	-3.136772595	0.512222843	5.27E-61	16.43620573	lrrk1	974	7.45E-60
118	ENSDARG00000007430	0.037788233	2	1	0.671979048	-0.22745548	7.62E-75	18.26669975	prdm12b	40	1.20E-73
119	ENSDARG00000007436	0.049367159	5	2	-3.052518092	5.771329599	7.43E-136	24.77962963	avpr2aa	12	1.57E-134
120	ENSDARG00000007461	0.13633825	7	1	-1.946501217	-5.504512591	0	64.61844116	srgap1a	4123	0
121	ENSDARG00000007561	0.294878598	3	2	0.028213345	6.191803651	0	139.8486332	cdh23	614	0
122	ENSDARG00000007663	0.084876409	5	2	-1.439944587	6.210432248	0	40.36453589	amph	192	0
123	ENSDARG00000007723	0.044652885	2	1	0.086396002	-0.81913182	6.67E-100	21.18423486	efnb1	3031	1.21E-98
124	ENSDARG00000007727	0.057182509	3	2	0.165398233	6.44120522	1.16E-162	27.15308936	rgl2	525	2.68E-161
125	ENSDARG00000007824	0.041640276	12	2	-2.235019169	2.869629102	1.84E-87	19.78933557	camta1b	364	3.10E-86
126	ENSDARG00000007869	0.045823147	14	1	4.745345392	-2.475163622	1.25E-105	21.79670304	ehd3	263	2.32E-104
127	ENSDARG00000007912	0.047436274	16	1	4.04118041	-4.296111388	4.91E-113	22.56384203	si:ch211-196i2.1	238	9.45E-112
128	ENSDARG00000008127	0.369706553	3	2	0.341457643	5.162289815	0	175.2337109	pcdh15b	1227	0
129	ENSDARG00000008140	0.152245022	5	2	-1.743605934	5.123665528	0	72.18887643	kcnab1a	1017	0
130	ENSDARG00000008370	0.038644107	1	1	-2.304499112	-3.756045146	2.01E-75	18.33939556	csnk1da	2002	3.16E-74
131	ENSDARG00000008398	0.084339309	14	1	4.888203897	-2.334328456	0	40.24282221	cacna1c	111	0
132	ENSDARG00000008413	0.091757273	4	1	2.466078081	0.684037285	0	43.5086122	atp11a	1737	0
133	ENSDARG00000008662	0.060457218	4	1	2.427988805	0.688771682	4.47E-181	28.67033329	fign	3906	1.10E-179
134	ENSDARG00000008849	0.296537945	3	2	-0.717865668	6.165554719	0	140.6190117	ptprq	670	0
135	ENSDARG00000008912	0.076086528	5	2	-1.713637672	6.076336579	6.70E-289	36.30518818	slc8a2a	94	2.13E-287
136	ENSDARG00000009014	0.107258741	9	1	3.157384672	-3.33060102	0	50.85612826	col11a1b	1511	0
137	ENSDARG00000009018	0.038723197	11	1	0.107485764	-5.101365371	2.69E-77	18.57225879	rhbg	62	4.28E-76
138	ENSDARG00000009031	0.033870414	1	1	-0.926293932	-3.78139524	1.85E-58	16.07682056	tnikb	2615	2.58E-57
139	ENSDARG00000009194	0.075157586	11	1	-0.31700214	-4.593401713	1.37E-278	35.64586085	col16a1	1525	4.24E-277
140	ENSDARG00000009311	0.075209819	2	1	0.934059181	-0.142467303	1.48E-279	35.70816351	pvalb6	419	4.60E-278
141	ENSDARG00000009387	0.0605568	2	1	0.528080173	-1.71748261	2.25E-182	28.77427632	robo4	406	5.55E-181
142	ENSDARG00000009401	0.186265322	16	1	4.102538385	-4.111774487	0	88.47244533	vcanb	260	0
143	ENSDARG00000009418	0.047012997	5	2	-2.761563979	5.847692685	1.05E-110	22.32523204	mef2cb	527	2.00E-109
144	ENSDARG00000009689	0.053107207	7	1	-1.797468863	-4.890531821	2.68E-140	25.18842708	daam1b	3650	5.73E-139
145	ENSDARG00000009727	0.157575253	3	2	0.298636489	6.624112325	0	74.74161479	twf2b	618	0
146	ENSDARG00000009839	0.059624169	9	1	2.666366138	-1.76906286	2.85E-176	28.28234305	fam117bb	1707	6.86E-175
147	ENSDARG00000009899	0.129329589	6	1	-2.779627047	-5.586989684	0	61.29373562	znf385a	7691	0
148	ENSDARG00000009930	0.140799137	3	2	0.600122549	5.121735768	0	66.83533861	cadm2a	410	0
149	ENSDARG00000010018	0.03502706	4	1	2.214325108	-0.797970897	1.70E-62	16.64288128	qki2	495	2.45E-61
150	ENSDARG00000010052	0.061685846	3	2	-0.688775561	6.144493299	1.78E-188	29.25786868	ndrg3b	1878	4.45E-187
151	ENSDARG00000010083	0.103592083	17	3	-3.186988555	0.874903517	0	49.12353656	rbfox3a	1280	0
152	ENSDARG00000010132	0.150727916	2	1	2.065316953	-2.139709039	0	71.43033349	dacha	10809	0
153	ENSDARG00000010186	0.159397445	3	2	0.454512813	7.123713689	0	75.65995625	myo3a	378	0
154	ENSDARG00000010192	0.039419602	12	2	-1.402315102	2.193646627	8.70E-79	18.75568566	pax3a	241	1.40E-77
155	ENSDARG00000010250	0.078402766	3	2	0.700162001	6.734212117	1.60E-305	37.34377525	nqo1	131	5.30E-304
156	ENSDARG00000010266	0.033521585	15	1	-0.797756992	-0.309739454	2.61E-57	15.91212001	igf2bp3	2119	3.58E-56
157	ENSDARG00000010591	0.074376924	10	2	0.490406342	3.08546968	3.59E-278	35.61875127	foxn4	72	1.11E-276
158	ENSDARG00000010681	0.035551386	8	2	-1.156282983	6.598579602	3.53E-64	16.87338984	tjap1	2192	5.15E-63
159	ENSDARG00000010710	0.042895821	1	1	-1.583496771	-2.74778275	2.13E-92	20.35431517	msi1	2029	3.70E-91
160	ENSDARG00000010758	0.040270457	7	1	-0.757970176	-4.764742894	4.07E-82	19.15903556	capn12	270	6.67E-81
161	ENSDARG00000010767	0.072386749	2	1	1.392029323	-1.68253438	1.51E-258	34.32784448	epha4l	1818	4.48E-257
162	ENSDARG00000010785	0.096630358	9	1	2.978952445	-3.490435643	0	45.82519027	thbs1b	1109	0
163	ENSDARG00000010791	0.148227401	10	2	0.486169972	2.843344407	0	70.28338463	dla	1107	0
164	ENSDARG00000011027	0.069967729	6	1	-2.413848124	-4.51587276	1.09E-241	33.1786292	fgfr1a	2528	3.10E-240
165	ENSDARG00000011065	0.053438728	5	2	-2.036497555	6.3710043	3.55E-142	25.3592598	camk2b1	1015	7.64E-141
166	ENSDARG00000011066	0.111332515	5	2	-2.944077216	5.633599954	0	53.05745295	glra3	122	0
167	ENSDARG00000011163	0.089079278	7	1	-1.9991953	-5.851620002	0	42.24490307	sema3fa	1238	0
168	ENSDARG00000011166	0.052285556	2	1	1.171380677	-0.802180557	1.16E-136	24.85424092	cahz	276	2.46E-135
169	ENSDARG00000011170	0.046602818	9	1	2.980514564	-1.414269669	1.24E-108	22.11101775	ndrg2	1821	2.33E-107
170	ENSDARG00000011171	0.034257362	12	2	-2.226430855	3.084933715	6.14E-60	16.28661247	si:ch211-12m10.1	381	8.64E-59
171	ENSDARG00000011245	0.076270787	1	1	-1.722608767	-3.425330682	8.35E-287	36.17214847	esrp1	1560	2.64E-285
172	ENSDARG00000011407	0.114223755	9	1	3.060767927	-3.281360669	0	54.1663228	col2a1b	1126	0
173	ENSDARG00000011449	0.035041569	1	1	-2.772716961	-2.523754163	9.41E-63	16.67837859	fes	225	1.36E-61
174	ENSDARG00000011473	0.098873919	5	2	-2.795928679	5.539172368	0	46.96085748	calcrla	344	0
175	ENSDARG00000011582	0.100083231	2	1	1.324714698	-1.887747748	0	47.44797184	sox5	2288	0
176	ENSDARG00000011600	0.138713592	4	1	2.091200866	0.779157238	0	65.75290875	epha4b	2049	0
177	ENSDARG00000011673	0.049976957	17	3	-3.33659812	0.766210394	2.69E-127	23.97249376	si:ch211-246m6.5	63	5.48E-126
178	ENSDARG00000011797	0.05664401	1	1	-2.827287875	-2.96783833	1.54E-159	26.88732618	tent5bb	605	3.51E-158
179	ENSDARG00000011845	0.040380185	1	1	-1.663678251	-2.278844638	2.05E-82	19.19466025	chn2	471	3.37E-81
180	ENSDARG00000012019	0.035081759	8	2	-1.638749204	7.738633351	9.79E-63	16.67603343	glra1	369	1.41E-61
181	ENSDARG00000012066	0.037136908	7	1	-0.920938454	-4.745675368	3.09E-70	17.67813165	dcn	253	4.69E-69
182	ENSDARG00000012078	0.179212298	2	1	1.602607526	-1.931478543	0	84.92768995	meis1b	4867	0
183	ENSDARG00000012204	0.037381699	4	1	2.130018629	-0.877887566	7.33E-71	17.75906363	CDK18	491	1.11E-69
184	ENSDARG00000012269	0.307173046	14	1	4.816264429	-2.438906116	0	146.3172095	clcn1b	113	0
185	ENSDARG00000012397	0.165959567	1	1	-2.076086007	-3.050636096	0	78.65230697	eya4	3586	0
186	ENSDARG00000012405	0.102520325	11	1	-0.052368842	-4.714759154	0	48.62110972	col1a1a	1189	0
187	ENSDARG00000012422	0.352014076	9	1	3.080130138	-3.306430144	0	166.8384946	col11a2	1400	0
188	ENSDARG00000012534	0.045737466	3	2	0.436036937	7.214466291	1.13E-106	21.90627109	slc6a6a	72	2.11E-105
189	ENSDARG00000012586	0.034667931	9	1	2.638789691	-1.852213902	3.63E-61	16.45869406	fmnl2a	1226	5.15E-60
190	ENSDARG00000012593	0.136020289	9	1	3.13100604	-3.249974532	0	64.46583209	col5a1	4821	0
191	ENSDARG00000012625	0.037569339	8	2	-1.840731583	7.160973744	1.14E-71	17.86307467	prkag2a	324	1.75E-70
192	ENSDARG00000012684	0.179839659	3	2	0.335444637	6.510697084	0	85.24365876	atp2b1a	1802	0
193	ENSDARG00000012801	0.059195673	1	1	-1.867021761	-2.615299745	4.83E-174	28.10046065	pfkpb	656	1.15E-172
194	ENSDARG00000012824	0.109500463	7	1	-2.156788312	-6.111166758	0	51.92102841	itga3b	1494	0
195	ENSDARG00000012833	0.054162133	9	1	2.790012874	-1.650714381	7.64E-146	25.68959643	foxn3	2744	1.66E-144
196	ENSDARG00000012896	0.116398647	2	1	0.932658173	-0.13575588	0	55.19638543	anos1a	1025	0
197	ENSDARG00000012914	0.148571395	1	1	-0.867514334	-3.980352921	0	70.41852593	arhgef4	3364	0
198	ENSDARG00000012944	0.03318949	18	4	18.17375878	-3.424263282	2.95E-56	15.75961805	myhz2	1020	4.00E-55
199	ENSDARG00000013005	0.048047524	4	1	1.907944598	0.884006219	7.89E-116	22.84664835	opcml	259	1.53E-114
200	ENSDARG00000013072	0.043517631	1	1	-1.795427523	-4.204752011	3.96E-95	20.66008284	mmp15b	775	6.99E-94
201	ENSDARG00000013144	0.120490629	14	1	4.779892721	-2.368875189	0	57.14194804	atp1b1a	953	0
202	ENSDARG00000013168	0.140982072	6	1	-2.139008961	-4.475045485	0	66.81688594	jag1b	4702	0
203	ENSDARG00000013174	0.045974032	2	1	0.700423397	-1.645989222	4.25E-106	21.84592256	nkd3	365	7.92E-105
204	ENSDARG00000013207	0.069026229	17	3	-3.350116931	0.781077104	1.13E-235	32.75891565	zeb1b	684	3.17E-234
205	ENSDARG00000013252	0.11280902	3	2	0.114478477	6.498323636	0	53.59735842	tmc5	274	0
206	ENSDARG00000013295	0.06962642	5	2	-2.557551346	5.496408658	4.37E-242	33.20629338	slc2a3a	105	1.24E-240
207	ENSDARG00000013310	0.033486391	7	1	-0.797818027	-4.780324502	1.67E-57	15.9400472	map3k15	255	2.29E-56
208	ENSDARG00000013312	0.03976494	17	3	-3.260798894	0.735206084	1.03E-79	18.86889031	cadps2	2744	1.66E-78
209	ENSDARG00000013335	0.139026493	5	2	-2.727303467	5.526912408	0	66.02565596	anxa6	304	0
210	ENSDARG00000013343	0.062130398	16	1	4.068064966	-4.261695189	3.09E-191	29.47409024	kif26ba	1225	7.78E-190
211	ENSDARG00000013415	0.032744748	7	1	-2.121276103	-6.061225219	4.44E-55	15.58730458	lmna	212	5.99E-54
212	ENSDARG00000013500	0.075372439	3	2	-0.377962671	6.651338296	1.35E-280	35.77505827	abca2	522	4.22E-279
213	ENSDARG00000013575	0.056023051	10	2	0.598343768	3.822392659	5.59E-156	26.58129416	rfx2	1193	1.25E-154
214	ENSDARG00000013598	0.035567608	13	1	2.464325942	-3.53774838	1.49E-64	16.92411673	tnfb	227	2.18E-63
215	ENSDARG00000013607	0.04624761	7	1	-1.947038136	-5.429272933	3.99E-107	21.95371938	sema3gb	748	7.46E-106
216	ENSDARG00000013615	0.098065249	9	1	2.32685975	-1.738424165	0	46.48914437	pbx3b	3128	0
217	ENSDARG00000013704	0.063272811	13	1	2.44229845	-4.021276994	3.86E-198	30.00801688	cers2a	2297	9.88E-197
218	ENSDARG00000013784	0.153306182	7	1	-1.783157549	-4.777849002	0	72.65662604	zgc:77158	4188	0
219	ENSDARG00000013847	0.042240541	4	1	2.391115941	0.539362984	1.14E-89	20.0439073	egfra	1895	1.95E-88
220	ENSDARG00000013853	0.034857349	2	1	0.280474078	-1.330210252	8.33E-62	16.54761462	lmo4a	1414	1.19E-60
221	ENSDARG00000013921	0.094454442	10	2	0.49886977	4.248633103	0	44.78701746	frya	1523	0
222	ENSDARG00000014017	0.035038622	15	1	-0.642095469	0.316959577	1.64E-62	16.64528576	rrm1	631	2.36E-61
223	ENSDARG00000014050	0.050982088	2	1	-0.033444903	-0.905838417	1.33E-129	24.19249723	ngfb	1219	2.76E-128
224	ENSDARG00000014081	0.153812269	3	2	-0.467486106	5.598733621	0	72.94198195	fam184a	808	0
225	ENSDARG00000014181	0.041553529	2	1	0.431296639	-2.323974533	7.79E-87	19.7164236	foxp1b	2726	1.31E-85
226	ENSDARG00000014246	0.058997756	1	1	-2.460405551	-2.612988872	6.13E-173	28.01007143	jag2a	554	1.45E-171
227	ENSDARG00000014248	0.040122833	16	1	3.998125114	-4.065873189	2.46E-81	19.06520203	pdlim3b	396	4.02E-80
228	ENSDARG00000014259	0.242083461	6	1	-2.633376799	-4.683996482	0	114.7060613	eya1	10891	0
229	ENSDARG00000014280	0.07665262	5	2	-1.471256099	5.696242528	7.99E-290	36.36367659	dlgap1a	847	2.55E-288
230	ENSDARG00000014302	0.032078361	12	2	-2.265336476	2.850091176	5.25E-53	15.27937353	brinp2	180	6.97E-52
231	ENSDARG00000014420	0.061232415	12	2	-1.509600244	2.317354875	3.74E-186	29.07483387	elavl3	620	9.30E-185
232	ENSDARG00000014488	0.039473541	2	1	1.428765096	-1.78809206	6.05E-79	18.77496743	ca2	247	9.73E-78
233	ENSDARG00000014577	0.033132118	2	1	1.386928	-2.975617452	4.82E-56	15.72854742	rhpn2	1644	6.53E-55
234	ENSDARG00000014746	0.057037033	12	2	-2.255754433	2.922511296	1.30E-161	27.06428128	rbfox1	994	2.97E-160
235	ENSDARG00000014796	0.040556658	1	1	-2.872280799	-3.274568601	3.11E-83	19.29233629	wnt11	251	5.15E-82
236	ENSDARG00000014891	0.090959776	16	1	3.746065893	-4.11659245	0	43.14147262	robo2	1052	0
237	ENSDARG00000014907	0.035076086	3	2	0.284204569	6.795940595	4.25E-63	16.72583444	htra1b	149	6.15E-62
238	ENSDARG00000014939	0.153179471	8	2	-1.111838542	7.06893702	0	72.66523291	kcnn2	596	0
239	ENSDARG00000014953	0.052021941	5	2	-2.713668309	5.536258893	2.40E-135	24.73228184	cnih3	269	5.06E-134
240	ENSDARG00000014973	0.048769017	14	1	4.837436475	-2.373628778	9.85E-120	23.23599592	ntng1a	148	1.95E-118
241	ENSDARG00000015002	0.210575902	4	1	2.055535712	-0.998934826	0	99.79478589	cdh4	2733	0
242	ENSDARG00000015016	0.159774254	7	1	-1.323636375	-4.837615294	0	75.72771811	kif26ab	2946	0
243	ENSDARG00000015144	0.190505555	5	2	-0.941242419	5.223735051	0	90.51679208	sh2d4bb	238	0
244	ENSDARG00000015176	0.215100254	2	1	0.825046696	-1.051401345	0	101.9282683	ror1	4728	0
245	ENSDARG00000015199	0.050449828	7	1	-1.85273429	-5.251649661	6.89E-127	23.93332997	cblb	2002	1.40E-125
246	ENSDARG00000015273	0.062020761	16	1	3.452030696	-3.817601247	1.74E-192	29.57144886	alpi.1	121	4.38E-191
247	ENSDARG00000015355	0.036303234	13	1	1.848601498	-3.777254863	7.94E-67	17.22979785	fosl1a	2280	1.18E-65
248	ENSDARG00000015449	0.130734945	1	1	-3.009896002	-1.850087149	0	61.97007896	fut8a	2456	0
249	ENSDARG00000015472	0.042028097	13	1	0.887203671	-3.561621709	9.09E-89	19.94032502	gpc4	2958	1.55E-87
250	ENSDARG00000015531	0.144667698	5	2	-3.020132027	5.720751004	0	69.28206678	slc4a8	66	0
251	ENSDARG00000015536	0.324852177	2	1	0.9156392	-1.50868444	0	153.9177252	sox6	6217	0
252	ENSDARG00000015557	0.038303464	13	1	1.179069139	-3.48010282	3.93E-74	18.17696594	zgc:100829	2339	6.14E-73
253	ENSDARG00000015566	0.064167563	7	1	-2.676190577	-5.731264872	8.65E-204	30.4379328	dnmt3ab	1337	2.25E-202
254	ENSDARG00000015627	0.242667775	16	1	4.053336658	-4.170005364	0	115.0733921	rgs6	810	0
255	ENSDARG00000015686	0.065836272	2	1	1.924195923	-2.799168153	7.18E-215	31.26411236	bmp6	427	1.92E-213
256	ENSDARG00000015709	0.051855974	2	1	1.600856819	-2.733948035	2.92E-134	24.63132686	hsd17b12a	486	6.09E-133
257	ENSDARG00000015793	0.03507453	16	1	4.013831176	-4.280164046	1.06E-62	16.67143126	creb3l1	383	1.53E-61
258	ENSDARG00000015891	0.043017754	16	1	3.983561315	-4.375762505	4.60E-93	20.42915252	ptprea	625	8.04E-92
259	ENSDARG00000015931	0.062856227	3	2	-1.083039127	6.252947049	8.73E-197	29.90398978	snap91b	189	2.23E-195
260	ENSDARG00000015947	0.466831532	9	1	3.136243858	-3.272378487	0	221.1899319	matn4	3789	0
261	ENSDARG00000015989	0.071370242	8	2	-1.410916887	6.642598348	1.61E-252	33.92133582	zdhhc16b	269	4.71E-251
262	ENSDARG00000016038	0.037105469	10	2	0.583876528	4.610381799	1.79E-70	17.7088438	hacd3	122	2.72E-69
263	ENSDARG00000016084	0.100735546	10	2	0.540008761	3.240259366	0	47.75323553	spsb4a	3455	0
264	ENSDARG00000016153	0.107799738	6	1	-2.821309529	-5.5834444	0	51.0956379	dag1	6502	0
265	ENSDARG00000016311	0.313524166	10	2	0.413675584	4.189746575	0	148.6002994	dock9b	1540	0
266	ENSDARG00000016404	0.036809125	2	1	0.758384087	-0.807185238	1.22E-68	17.46963862	ptch1	2063	1.83E-67
267	ENSDARG00000016484	0.032753567	15	1	-0.832564436	-0.30748014	6.34E-55	15.56456079	dkc1	585	8.53E-54
268	ENSDARG00000016490	0.048108908	1	1	-2.531261168	-3.35970406	1.20E-115	22.82815559	rab11fip3	1292	2.34E-114
269	ENSDARG00000016551	0.121857975	5	2	-1.32765039	5.402303414	0	57.76041365	iqsec1b	3321	0
270	ENSDARG00000016598	0.048699318	8	2	-1.674219571	7.389583783	3.55E-120	23.27985167	ckmt1	81	7.04E-119
271	ENSDARG00000016623	0.138954631	1	1	-2.263041936	-3.136623187	0	65.86734948	si:ch211-195b13.1	2039	0
272	ENSDARG00000016676	0.039792321	12	2	-1.698308549	2.51866241	7.50E-80	18.88553866	gnao1a	1568	1.22E-78
273	ENSDARG00000016739	0.074152787	7	1	-2.338784657	-6.167505546	4.47E-274	35.3532161	lrrc4cb	105	1.38E-272
274	ENSDARG00000016866	0.096670408	2	1	1.119144418	-0.719912065	0	45.83417746	fam102ab	1921	0
275	ENSDARG00000016963	0.04049591	4	1	2.487867155	-0.225342257	9.44E-83	19.23493769	slc16a1a	517	1.55E-81
276	ENSDARG00000016981	0.294415507	6	1	-3.105128728	-5.261375708	0	139.5128773	bcar3	3145	0
277	ENSDARG00000016999	0.128890967	2	1	0.443226762	-1.386810763	0	61.10675983	lin28a	1523	0
278	ENSDARG00000017004	0.055367101	2	1	0.974824049	-0.160352213	2.65E-152	26.26139774	myo10	2514	5.86E-151
279	ENSDARG00000017036	0.060372798	3	2	-0.052272372	4.939296441	1.87E-181	28.70076343	svilc	261	4.58E-180
280	ENSDARG00000017155	0.072718421	6	1	-3.717932187	-4.933100505	1.98E-262	34.58702974	wnt10a	258	5.95E-261
281	ENSDARG00000017168	0.088057855	2	1	0.691512563	-0.163398845	0	41.85627639	nr2f1b	243	0
282	ENSDARG00000017354	0.033349806	11	1	-0.084144346	-3.620500607	9.83E-57	15.8289369	epha2a	3333	1.34E-55
283	ENSDARG00000017369	0.055528053	7	1	-1.378504358	-4.807159228	3.98E-154	26.42049321	sema3d	212	8.84E-153
284	ENSDARG00000017386	0.037189925	2	1	0.724658169	-0.67939849	4.74E-70	17.65400523	sobpb	1219	7.18E-69
285	ENSDARG00000017398	0.032165541	9	1	3.205096282	-1.63220684	3.51E-53	15.30559532	slc44a5a	254	4.66E-52
286	ENSDARG00000017425	0.252316939	10	2	0.346699588	4.36649962	0	119.8031771	crocc2	296	0
287	ENSDARG00000017441	0.04222203	18	4	18.16492394	-3.415379567	1.36E-89	20.03522597	mylz3	1818	2.32E-88
288	ENSDARG00000017466	0.178074086	4	1	2.203231253	-0.919463828	0	84.43752969	ncam2	974	0
289	ENSDARG00000017522	0.106282703	15	1	-0.60406395	0.307426767	0	50.37837184	ctdp1	5038	0
290	ENSDARG00000017591	0.06988072	6	1	-2.760769568	-5.716662688	5.05E-241	33.13254709	fat1a	6339	1.43E-239
291	ENSDARG00000017665	0.052715798	4	1	2.744996108	-0.221209927	2.24E-139	25.10408098	snrkb	171	4.78E-138
292	ENSDARG00000017673	0.115450667	12	2	-1.239073239	2.128267961	0	54.7262263	nova2	2983	0
293	ENSDARG00000017901	0.032531605	7	1	-2.237818204	-5.127138419	4.05E-54	15.44538792	tln2a	1397	5.43E-53
294	ENSDARG00000017929	0.034440203	15	1	-0.072737477	-0.16023509	2.40E-60	16.34402373	ncoa2	5200	3.39E-59
295	ENSDARG00000017982	0.048718135	8	2	-1.547408901	6.488863187	5.53E-120	23.26083261	cyp39a1	97	1.09E-118
296	ENSDARG00000018065	0.421255918	9	1	2.93047408	-1.731740816	0	199.6245013	ntm	2147	0
297	ENSDARG00000018162	0.068091913	7	1	-1.644328676	-4.943415446	4.76E-229	32.29044048	ctnnal1	2453	1.32E-227
298	ENSDARG00000018228	0.079944777	9	1	3.163698949	-2.069208784	0	37.91080097	htr2cl1	1849	0
299	ENSDARG00000018303	0.060162027	7	1	-1.770436488	-4.27575211	1.41E-179	28.5499263	etv4	804	3.43E-178
300	ENSDARG00000018397	0.11103202	6	1	-2.552576504	-4.751964135	0	52.64854668	hpca	1210	0
301	ENSDARG00000018404	0.056780723	9	1	2.46290616	-2.895690126	3.18E-160	26.94592763	krt18a.1	943	7.26E-159
302	ENSDARG00000018693	0.059508843	1	1	-1.429519735	-3.319747014	1.66E-175	28.22008308	cdh2	4901	3.97E-174
303	ENSDARG00000018721	0.079073057	6	1	-3.1912603	-5.130240245	2.62E-308	37.51498216	npnta	875	8.78E-307
304	ENSDARG00000018809	0.041806012	4	1	2.660280742	-0.27841912	4.85E-88	19.85637453	abhd3	532	8.21E-87
305	ENSDARG00000018817	0.056867029	8	2	-0.49534776	7.492050367	3.02E-161	27.03311887	bdnf	247	6.91E-160
306	ENSDARG00000018896	0.032099364	5	2	-2.496336423	5.654382901	3.00E-53	15.31579895	mmp24	121	3.99E-52
307	ENSDARG00000018923	0.074993496	11	1	-0.201514624	-4.273897452	9.25E-279	35.6567677	fat2	478	2.88E-277
308	ENSDARG00000018971	0.042421759	1	1	-2.084564171	-2.510700626	1.16E-90	20.15714385	b3gnt5a	494	2.01E-89
309	ENSDARG00000018984	0.249325133	1	1	-2.036347352	-3.551015897	0	118.1425442	eya2	5130	0
310	ENSDARG00000019063	0.279960504	7	1	-2.242555819	-5.925699038	0	132.6970383	fat1b	1350	0
311	ENSDARG00000019135	0.03302883	3	2	0.150890373	7.221740918	2.42E-56	15.77211219	ankef1a	123	3.29E-55
312	ENSDARG00000019191	0.074140282	4	1	1.884918847	0.38228138	4.65E-271	35.15632675	12-Sep	2517	1.43E-269
313	ENSDARG00000019235	0.034863516	9	1	2.808274545	-1.91048388	7.19E-62	16.55643786	sema3aa	790	1.03E-60
314	ENSDARG00000019328	0.241139689	4	1	2.465927877	-0.500625504	0	114.2838954	plxna4	2070	0
315	ENSDARG00000019341	0.050952234	16	1	4.220420398	-3.863527102	1.39E-129	24.1907714	gpc1a	608	2.87E-128
316	ENSDARG00000019353	0.067221515	9	1	3.144084014	-3.202585502	2.39E-223	31.88176706	sparc	1674	6.53E-222
317	ENSDARG00000019392	0.073839389	1	1	-1.937028132	-3.334579272	4.06E-269	35.02905	stat5a	981	1.24E-267
318	ENSDARG00000019525	0.072447674	10	2	0.512684591	3.709279256	1.98E-259	34.38690761	tbcelb	565	5.89E-258
319	ENSDARG00000019601	0.21249949	6	1	-2.742370806	-5.626803679	0	100.7170871	col12a1b	2003	0
320	ENSDARG00000019658	0.033826218	12	2	-1.657696567	2.496457534	1.48E-58	16.09062824	pou2f2a	275	2.06E-57
321	ENSDARG00000019702	0.071255397	8	2	-1.630776725	7.011592584	4.85E-252	33.88890936	aldocb	215	1.41E-250
322	ENSDARG00000019741	0.130555353	10	2	0.509939976	3.034425693	0	62.35059586	ccndx	82	0
323	ENSDARG00000019815	0.206666799	2	1	1.625059046	-2.278671904	0	97.95462949	fn1a	1948	0
324	ENSDARG00000019845	0.033336038	13	1	0.800749757	-3.725563092	1.00E-56	15.8275487	pdlim1	1362	1.37E-55
325	ENSDARG00000019949	0.07997749	16	1	3.920568742	-4.070772691	0	37.92945316	serpinh1b	1416	0
326	ENSDARG00000020007	0.145487812	11	1	-0.067095302	-4.736101432	0	68.97780601	col1a2	1461	0
327	ENSDARG00000020053	0.072616274	6	1	-3.898234568	-5.107289119	3.16E-260	34.44018595	nkd1	1611	9.42E-259
328	ENSDARG00000020080	0.035585305	12	2	-1.372054658	2.182520108	1.91E-64	16.90959499	ek1	466	2.79E-63
329	ENSDARG00000020136	0.045124452	7	1	-1.488092385	-4.730252547	3.24E-103	21.5406231	ptges	126	5.97E-102
330	ENSDARG00000020219	0.067039997	10	2	0.522943892	3.223671155	4.74E-224	31.93242032	dld	145	1.30E-222
331	ENSDARG00000020235	0.044108471	16	1	4.06250719	-4.060793919	1.37E-97	20.93204284	sept9a	1322	2.44E-96
332	ENSDARG00000020284	0.04719759	3	2	-0.050772719	5.596126275	8.24E-112	22.43876279	si:ch211-278j3.3	271	1.58E-110
333	ENSDARG00000020292	0.152519056	8	2	-1.660830579	6.702578263	0	72.36904274	si:ch211-254n4.3	488	0
334	ENSDARG00000020298	0.069716027	13	1	2.315619029	-3.770095153	6.32E-240	33.05625754	btg2	4318	1.79E-238
335	ENSDARG00000020328	0.087061008	1	1	-1.314817868	-3.721179767	0	41.27172957	plekha6	5920	0
336	ENSDARG00000020395	0.188951999	3	2	-0.092992417	5.019541936	0	89.59362989	mical2b	903	0
337	ENSDARG00000020509	0.09607725	3	2	-0.42892047	6.282251554	0	45.62883982	srd5a1	332	0
338	ENSDARG00000020544	0.054950985	5	2	-2.899090729	5.870471673	4.81E-155	26.50026043	rem1	41	1.07E-153
339	ENSDARG00000020574	0.082203762	18	4	18.16785172	-3.418568654	0	38.97395286	atp2a1	3281	0
340	ENSDARG00000020581	0.640635266	3	2	-0.380454443	6.414004521	0	303.670133	otofb	951	0
341	ENSDARG00000020656	0.048991679	6	1	-3.108967267	-5.489680571	6.74E-120	23.25232344	prkg1a	840	1.33E-118
342	ENSDARG00000020746	0.179994831	3	2	-0.902677022	5.96136971	0	85.45452959	gfi1aa	320	0
343	ENSDARG00000020759	0.103422184	1	1	-1.121944271	-3.462850852	0	49.02402801	elf1	4713	0
344	ENSDARG00000020771	0.108714241	8	2	-1.610654078	7.631763654	0	51.67065734	tnr	237	0
345	ENSDARG00000020845	0.156684618	4	1	1.968653359	-0.458377285	0	74.25825582	tns1b	3697	0
346	ENSDARG00000020847	0.049357986	8	2	-0.67041447	6.614117818	8.84E-122	23.43759674	atp6v0a1a	556	1.77E-120
347	ENSDARG00000020871	0.26871473	4	1	2.538804092	0.63551362	0	127.427923	ptprz1b	678	0
348	ENSDARG00000020946	0.036902845	4	1	2.274009981	0.523929792	4.42E-69	17.52743266	auts2b	668	6.66E-68
349	ENSDARG00000021137	0.206217411	3	2	-0.460568808	5.688698011	0	97.78077731	adgrv1	898	0
350	ENSDARG00000021242	0.060301179	13	1	1.858137764	-3.750086589	2.62E-180	28.60867776	mvp	1130	6.40E-179
351	ENSDARG00000021389	0.122106246	6	1	-3.730596505	-4.45600347	0	57.88351153	jag2b	2357	0
352	ENSDARG00000021432	0.046276386	5	2	-1.715434037	4.538610654	6.35E-108	22.03712016	odf3l2b	176	1.19E-106
353	ENSDARG00000021442	0.280532405	2	1	0.617457457	-1.448747201	0	132.9362599	cdh11	2923	0
354	ENSDARG00000021443	0.051530489	1	1	-2.669209681	-2.579534693	2.20E-132	24.45545606	zfp36l1b	906	4.58E-131
355	ENSDARG00000021455	0.151684081	10	2	0.542855867	3.172729688	0	71.89130495	strbp	3243	0
356	ENSDARG00000021539	0.05069318	1	1	-1.433726035	-2.315294666	4.34E-128	24.04842083	ephb2b	2155	8.87E-127
357	ENSDARG00000021566	0.049861204	4	1	2.811999359	-0.382266445	1.87E-124	23.69839971	OTOP1	299	3.78E-123
358	ENSDARG00000021590	0.07605702	4	1	2.484391727	0.732807236	4.28E-285	36.06320769	magi2a	2725	1.35E-283
359	ENSDARG00000021607	0.132918187	2	1	1.468761243	-1.623105628	0	62.99847049	negr1	3689	0
360	ENSDARG00000021677	0.050808318	1	1	-2.540973626	-3.421877189	4.93E-129	24.13848344	phf11	350	1.02E-127
361	ENSDARG00000021720	0.112596911	7	1	-0.864409051	-4.789083285	0	53.42890008	col7a1	544	0
362	ENSDARG00000021833	0.060763364	2	1	1.76332108	-1.865003033	7.13E-183	28.81416774	ahr2	5053	1.76E-181
363	ENSDARG00000021869	0.060667081	8	2	-1.858483277	7.375077443	3.34E-183	28.84045395	rcan2	258	8.25E-182
364	ENSDARG00000021895	0.053432582	4	1	2.024258413	-0.309715493	3.26E-142	25.36260602	disc1	660	7.02E-141
365	ENSDARG00000021948	0.107771329	2	1	1.615548052	-1.975568576	0	51.08943869	tnc	2448	0
366	ENSDARG00000021987	0.296715043	1	1	-2.203757725	-4.123745007	0	140.5908209	plecb	5649	0
367	ENSDARG00000022176	0.043354022	12	2	-2.254171334	2.899193721	1.98E-94	20.58212622	IGLON5	799	3.49E-93
368	ENSDARG00000022254	0.176984106	10	2	0.460638859	3.787038045	0	83.92284394	prkcbb	992	0
369	ENSDARG00000022456	0.091077972	5	2	-2.155154906	5.623201566	0	43.26906306	eno1a	285	0
370	ENSDARG00000022518	0.131140752	5	2	-2.905017815	5.57818337	0	62.22610045	pex5la	494	0
371	ENSDARG00000022560	0.087884714	5	2	-3.030658923	5.774775701	0	43.27067748	clcnk	17	0
372	ENSDARG00000022668	0.051338325	8	2	-1.347121916	7.480417447	1.87E-138	25.01954632	grapb	23	3.98E-137
373	ENSDARG00000022712	0.091874362	13	1	1.765202083	-3.725349707	0	43.55074866	stat3	7840	0
374	ENSDARG00000022727	0.039440893	13	1	1.127093293	-3.063498063	1.82E-78	18.71646341	epha2b	2335	2.90E-77
375	ENSDARG00000022772	0.28948145	3	2	0.392575436	5.606811719	0	137.3136294	si:ch211-106a19.1	540	0
376	ENSDARG00000022807	0.062732712	1	1	-1.792320452	-2.526003761	5.13E-195	29.7676275	pitpnc1b	1037	1.30E-193
377	ENSDARG00000022895	0.14022073	3	2	0.285628245	7.182024198	0	66.65052052	mcf2a	224	0
378	ENSDARG00000022971	0.061668909	4	1	2.458187141	0.694113212	4.18E-189	29.30732318	epha6	310	1.05E-187
379	ENSDARG00000023217	0.035265975	13	1	1.88550321	-3.795987887	3.47E-63	16.73793994	crema	2216	5.02E-62
380	ENSDARG00000023448	0.064843139	2	1	0.910225071	-1.268858267	3.29E-208	30.7701094	galnt14	777	8.68E-207
381	ENSDARG00000023546	0.082328346	5	2	-2.920143328	5.83517571	0	39.16596615	kcnn1b	178	0
382	ENSDARG00000023578	0.052760871	13	1	0.584305622	-3.781277699	1.74E-138	25.02247703	lpp	6761	3.70E-137
383	ENSDARG00000023609	0.092484531	4	1	2.434114732	-0.505294127	0	43.914104	AL845324.1	396	0
384	ENSDARG00000023759	0.045022024	1	1	-1.99421259	-2.907848401	6.42E-102	21.40184171	zgc:73226	327	1.17E-100
385	ENSDARG00000023797	0.039878359	18	4	18.180589	-3.430954022	2.11E-80	18.95236529	ryr1b	356	3.44E-79
386	ENSDARG00000023868	0.06634975	4	1	1.83025948	-1.347468687	1.45E-217	31.46172362	si:dkey-172h23.2	3992	3.93E-216
387	ENSDARG00000023963	0.053376862	13	1	1.139695265	-3.352576537	9.50E-142	25.32049546	tpm4a	1868	2.04E-140
388	ENSDARG00000024032	0.068701964	9	1	2.632538118	-2.720512433	6.93E-237	32.84402133	coch	79	1.94E-235
389	ENSDARG00000024276	0.085396813	7	1	-1.970630608	-5.191572471	0	40.48608835	pcbp4	3320	0
390	ENSDARG00000024365	0.069574923	11	1	-0.247810505	-4.522830529	1.61E-239	33.02794504	crlf1a	608	4.54E-238
391	ENSDARG00000024488	0.039919782	15	1	-0.484385334	0.854114251	2.18E-80	18.95074329	top2a	1032	3.54E-79
392	ENSDARG00000024492	0.274127113	9	1	3.095474758	-3.222982688	0	129.9152597	col9a2	1904	0
393	ENSDARG00000024694	0.050805622	15	1	-0.668746017	0.220635729	1.24E-128	24.10031544	myo1b	2529	2.54E-127
394	ENSDARG00000024740	0.038713701	6	1	-4.065105162	-5.14135818	3.26E-158	26.77385252	gng13a	2	7.37E-157
395	ENSDARG00000024744	0.199287076	4	1	2.656213798	0.176427202	0	94.50987745	dpp6b	718	0
396	ENSDARG00000024746	0.109835995	4	1	3.051041641	0.009327548	0	52.07992439	hsp90aa1.2	1309	0
397	ENSDARG00000024785	0.081109401	12	2	-1.777008973	2.624002175	0	38.46183681	ctnna2	1743	0
398	ENSDARG00000024829	0.064219771	11	1	-0.077288203	-4.3911591	3.67E-204	30.46610773	tnn	1364	9.58E-203
399	ENSDARG00000024865	0.066164141	8	2	-1.598321519	7.359534459	1.40E-217	31.46290067	dscama	229	3.79E-216
400	ENSDARG00000024966	0.053438591	13	1	2.569921293	-3.854707999	4.88E-142	25.34678589	MARK4	2728	1.05E-140
401	ENSDARG00000025320	0.130368703	17	3	-3.281806193	0.717135387	0	62.48348858	col21a1	71	0
402	ENSDARG00000025335	0.045009213	8	2	-0.422000728	7.11256619	1.05E-102	21.48619737	nek10	108	1.93E-101
403	ENSDARG00000025348	0.078504364	7	1	-2.389292679	-5.81774692	1.15E-303	37.22930848	igfbp5b	1638	3.78E-302
404	ENSDARG00000025641	0.104156261	2	1	1.543137946	-2.315033479	0	49.372592	gli2a	3844	0
405	ENSDARG00000025757	0.035959022	1	1	-1.806821309	-2.229487581	7.31E-66	17.10084947	tspan35	373	1.08E-64
406	ENSDARG00000025920	0.073374414	11	1	0.257249132	-3.209449334	1.60E-265	34.79214124	tiam1b	3079	4.84E-264
407	ENSDARG00000025974	0.260856171	3	2	-0.61459174	6.201002793	0	123.6926111	magi3b	772	0
408	ENSDARG00000026086	0.03733141	3	2	0.16790817	5.696785169	2.91E-71	17.81088862	zgc:162324	121	4.44E-70
409	ENSDARG00000026165	0.438315953	9	1	3.117683925	-3.308801932	0	207.6712231	col11a1a	5715	0
410	ENSDARG00000026329	0.097449506	2	1	1.148873069	-2.24188046	0	46.19833983	arhgap29a	2687	0
411	ENSDARG00000026395	0.042181358	12	2	-1.388651095	2.191253381	5.57E-90	20.07959033	rfx4	212	9.54E-89
412	ENSDARG00000026406	0.098377392	3	2	0.399086334	7.210928159	0	47.17569315	anxa5a	52	0
413	ENSDARG00000026473	0.06275657	1	1	-1.166323505	-3.155689759	6.43E-195	29.76002361	six1b	3623	1.63E-193
414	ENSDARG00000026482	0.045098682	2	1	0.611644276	-0.852296041	7.02E-102	21.39769416	arhgap12b	1932	1.28E-100
415	ENSDARG00000026499	0.048785449	16	1	4.200856246	-4.159707589	7.31E-119	23.1497769	ppm1e	1218	1.44E-117
416	ENSDARG00000026519	0.042278282	1	1	-1.105391107	-3.813309474	8.55E-90	20.05827079	ralgps2	3834	1.46E-88
417	ENSDARG00000026531	0.070704771	6	1	-3.190899335	-5.250102801	7.82E-247	33.53354171	alcama	1582	2.25E-245
418	ENSDARG00000026629	0.116202708	1	1	-2.722699843	-2.5635889	0	55.09679377	gmds	1489	0
419	ENSDARG00000026736	0.044232578	6	1	-2.828401766	-5.582567496	3.64E-98	20.99504354	il11ra	925	6.53E-97
420	ENSDARG00000026753	0.057597914	17	3	-3.25182458	0.715310173	4.53E-165	27.35640632	grik4	451	1.05E-163
421	ENSDARG00000026784	0.272952394	6	1	-3.462476454	-5.176578803	0	129.3291993	robo1	10617	0
422	ENSDARG00000026865	0.033308664	10	2	0.004973092	4.799347596	1.29E-56	15.81162737	fam107b	1875	1.76E-55
423	ENSDARG00000026979	0.144728008	1	1	-2.681640111	-2.855331821	0	68.68784109	krt1-c5	439	0
424	ENSDARG00000027041	0.097731971	10	2	0.443621047	2.914130168	0	46.33488293	pcdh17	2501	0
425	ENSDARG00000027065	0.032671847	8	2	-0.29494556	7.442342954	1.15E-54	15.52625181	slc38a3a	479	1.55E-53
426	ENSDARG00000027079	0.044099516	5	2	-1.861471377	4.203508096	4.32E-98	20.98691462	znf804a	222	7.73E-97
427	ENSDARG00000027087	0.038975349	11	1	-0.375435017	-3.800869269	7.91E-77	18.51433437	tgfb2	703	1.25E-75
428	ENSDARG00000027112	0.058834337	1	1	-1.331865392	-3.549489303	1.21E-171	27.90363327	ephb4b	2888	2.85E-170
429	ENSDARG00000027192	0.033641826	8	2	-0.307730876	7.402167516	6.63E-59	16.14045937	hcn3	61	9.26E-58
430	ENSDARG00000027249	0.058497128	13	1	1.816276111	-3.841809316	1.11E-169	27.74136028	btg1	4359	2.60E-168
431	ENSDARG00000027495	0.071395984	5	2	-2.258395157	5.575723844	6.56E-254	34.01555928	elovl4b	130	1.93E-252
432	ENSDARG00000027497	0.032869887	5	2	-3.025754414	5.706945615	3.68E-56	15.74566586	mast1a	73	4.99E-55
433	ENSDARG00000027828	0.046829756	8	2	-1.381613813	7.422567563	2.24E-111	22.39423263	grin1a	77	4.28E-110
434	ENSDARG00000027903	0.095481102	9	1	3.018299856	-3.587095065	0	45.27607281	adamtsl3	1415	0
435	ENSDARG00000027933	0.268178422	4	1	2.108658709	-0.953762623	0	127.3554284	glis1b	269	0
436	ENSDARG00000027938	0.040396932	15	1	-0.65284308	0.270699697	3.09E-82	19.17333112	rad18	1398	5.07E-81
437	ENSDARG00000028000	0.039628804	14	1	4.925525464	-2.42034368	3.68E-80	18.92311494	pfkpa	118	5.98E-79
438	ENSDARG00000028071	0.059516384	13	1	2.563313999	-4.006948037	1.18E-175	28.23223563	bmp1a	1513	2.82E-174
439	ENSDARG00000028118	0.168042218	12	2	-2.171949826	3.748916822	0	79.67935182	dscamb	935	0
440	ENSDARG00000028148	0.212046361	2	1	0.832834162	-1.281184329	0	100.5062228	pax2a	1635	0
441	ENSDARG00000028159	0.032257182	13	1	1.030518033	-3.660428328	3.17E-53	15.31222531	tead1a	2327	4.21E-52
442	ENSDARG00000028213	0.108854392	18	4	18.15982179	-3.410375876	0	51.59602507	ttn.2	6099	0
443	ENSDARG00000028335	0.043512304	15	1	-1.046960912	-0.169621808	5.25E-95	20.64645258	hmga1a	1979	9.26E-94
444	ENSDARG00000028485	0.409307986	5	2	-1.716669999	4.519008832	0	196.8128356	cabp5b	45	0
445	ENSDARG00000028507	0.08656724	11	1	-0.144289396	-4.427264256	0	41.05381164	itgb4	1492	0
446	ENSDARG00000028533	0.097581177	10	2	0.680308678	4.019112306	0	46.25525839	macf1a	5688	0
447	ENSDARG00000028618	0.127709887	1	1	-2.40274664	-2.339162393	0	60.57128677	krt18b	960	0
448	ENSDARG00000028661	0.096112324	2	1	1.583574333	-2.375100298	0	45.56197464	cntfr	3718	0
449	ENSDARG00000028896	0.078226926	6	1	-3.3205752	-5.305115504	8.40E-302	37.11386116	plpp2b	831	2.75E-300
450	ENSDARG00000029124	0.03619216	6	1	-4.10997983	-5.141168399	9.24E-68	17.35372943	adamts15a	68	1.38E-66
451	ENSDARG00000029168	0.081686443	5	2	-2.274059496	5.375064569	0	38.79725868	ppfibp2b	371	0
452	ENSDARG00000029263	0.265480785	6	1	-4.081769667	-4.882011456	0	125.8476759	hoxb3a	1114	0
453	ENSDARG00000029296	0.084372562	4	1	1.830222287	-0.984630404	0	40.00247438	nexmifb	2741	0
454	ENSDARG00000029370	0.041904993	6	1	-3.261332474	-5.220106406	2.10E-88	19.89851974	ankrd6b	651	3.56E-87
455	ENSDARG00000029443	0.061703664	13	1	1.859250345	-3.677271171	1.58E-188	29.26201194	zgc:92242	3384	3.95E-187
456	ENSDARG00000029472	0.049140239	2	1	1.243776657	-2.212652488	1.87E-120	23.30719074	afdna	7025	3.72E-119
457	ENSDARG00000029476	0.068399609	9	1	2.627577104	-2.788653655	1.46E-231	32.46892085	ldlra	539	4.07E-230
458	ENSDARG00000029480	0.061034413	1	1	-2.962510071	-3.290169759	6.83E-185	28.97480694	specc1	537	1.69E-183
459	ENSDARG00000029482	0.158216471	4	1	2.019735612	-0.854982505	0	75.02926145	ush2a	813	0
460	ENSDARG00000029668	0.087627016	6	1	-2.726740561	-5.672528548	0	41.53952426	crim1	6183	0
461	ENSDARG00000029841	0.061490512	1	1	-2.975281439	-2.494124575	1.66E-188	29.26036217	tmprss9	174	4.14E-187
462	ENSDARG00000029865	0.035346428	1	1	-2.75176426	-2.260898633	1.67E-63	16.78135593	rassf2a	1160	2.42E-62
463	ENSDARG00000029952	0.046594456	5	2	-1.484735571	5.796776967	2.13E-109	22.19021394	ampd2b	159	4.04E-108
464	ENSDARG00000030107	0.073306709	1	1	-2.937311373	-3.112542195	1.56E-265	34.79289318	si:ch211-207i1.2	618	4.72E-264
465	ENSDARG00000030311	0.11211297	3	2	-0.05585768	6.494826512	0	53.3143154	tmc2b	199	0
466	ENSDARG00000030514	0.04206168	1	1	-2.936560116	-2.34963314	2.94E-89	19.99681799	acsl1a	295	5.00E-88
467	ENSDARG00000030614	0.042023676	12	2	-2.282268963	2.904902177	4.39E-89	19.9766845	syt1a	328	7.48E-88
468	ENSDARG00000030782	0.074243435	9	1	3.221169271	-1.750465794	7.33E-273	35.27409772	exoc3l2b	310	2.25E-271
469	ENSDARG00000030824	0.054772637	1	1	-2.090494834	-3.838330789	3.54E-149	25.98627891	esyt2a	1411	7.74E-148
470	ENSDARG00000030832	0.271095475	5	2	-2.218275509	5.265283303	0	128.5781968	otofa	617	0
471	ENSDARG00000030932	0.078739658	4	1	1.73309163	-0.657227723	1.90E-305	37.33917946	fgf10a	1746	6.28E-304
472	ENSDARG00000030933	0.048684452	11	1	0.016986154	-4.737966103	4.67E-119	23.16904341	ksr1b	240	9.21E-118
473	ENSDARG00000031049	0.233319113	7	1	-2.325790368	-6.225594325	0	110.6115211	igsf21a	1088	0
474	ENSDARG00000031075	0.171364897	2	1	1.054356255	-1.320856465	0	81.20853048	cadm1a	5430	0
475	ENSDARG00000031095	0.120834263	2	1	1.884714403	-2.191348953	0	57.27918204	veph1	2302	0
476	ENSDARG00000031108	0.068001691	1	1	-2.028691493	-3.031455083	2.27E-228	32.24209978	lrba	7036	6.27E-227
477	ENSDARG00000031307	0.057252682	12	2	-1.412406049	2.202921109	8.23E-248	33.60055481	zic4	4	2.37E-246
478	ENSDARG00000031372	0.097549384	2	1	0.611145027	-0.506577862	0	46.24221731	efna2a	4151	0
479	ENSDARG00000031483	0.162381495	9	1	2.846376933	-2.648467464	0	76.96866342	col9a1b	1876	0
480	ENSDARG00000031683	0.035077644	13	1	2.290077962	-3.583654446	1.59E-62	16.64715276	fosab	3443	2.29E-61
481	ENSDARG00000031720	0.059960034	1	1	-1.673801265	-3.290251059	3.69E-178	28.43541863	clstn1	3366	8.96E-177
482	ENSDARG00000031756	0.07531288	7	1	-2.328183375	-6.344723029	1.18E-279	35.71444359	mef2aa	1969	3.68E-278
483	ENSDARG00000031763	0.133984303	2	1	1.563311138	-2.14964859	0	63.50704445	smad6b	2924	0
484	ENSDARG00000031891	0.069906694	2	1	1.383868374	-1.762110693	8.16E-242	33.1874702	tbx1	464	2.31E-240
485	ENSDARG00000031894	0.18859559	6	1	-3.697837792	-5.151609702	0	89.37979075	lef1	2864	0
486	ENSDARG00000031907	0.060171718	2	1	1.048340239	-0.992241925	2.14E-179	28.53519131	ptbp1b	3529	5.21E-178
487	ENSDARG00000031952	0.044824163	4	1	2.419847764	0.387480335	2.88E-101	21.33172139	mb	193	5.24E-100
488	ENSDARG00000032049	0.078054878	4	1	1.95229403	-0.093017621	4.17E-300	37.00854163	enah	3148	1.36E-298
489	ENSDARG00000032161	0.060402558	11	1	-0.014697455	-3.566930814	9.66E-181	28.64350332	srgap2	5178	2.37E-179
490	ENSDARG00000032199	0.075676999	6	1	-3.261519156	-5.340965552	1.58E-282	35.89897051	gpc3	929	4.98E-281
491	ENSDARG00000032234	0.033472594	7	1	-1.411687575	-4.881647391	3.61E-58	16.03553061	wnt2bb	74	4.99E-57
492	ENSDARG00000032317	0.067394101	10	2	0.494976901	2.463088946	2.18E-224	31.95668649	tox	3874	5.99E-223
493	ENSDARG00000032324	0.039860205	2	1	1.754922308	-2.558431191	4.21E-80	18.91595427	epb41l5	1877	6.85E-79
494	ENSDARG00000032482	0.03941492	3	2	0.102759488	5.62401505	1.58E-78	18.72408935	si:dkey-40c11.2	479	2.52E-77
495	ENSDARG00000032578	0.172594364	4	1	1.313442864	-0.098670585	0	81.81808337	pax2b	1348	0
496	ENSDARG00000032601	0.07864495	3	2	0.032140948	5.47185679	1.39E-304	37.28578154	macrod2	4555	4.61E-303
497	ENSDARG00000032614	0.096101415	1	1	-2.599002085	-2.204009576	0	45.55352542	msi2b	7458	0
498	ENSDARG00000032617	0.223723202	4	1	2.128026404	0.636510568	0	106.0280665	fgfrl1a	2800	0
499	ENSDARG00000032623	0.034177347	2	1	0.785862185	-1.051434351	1.56E-59	16.22957095	rcan3	894	2.18E-58
500	ENSDARG00000032630	0.099209846	18	4	18.15540246	-3.406153245	0	47.03856814	neb	1746	0
501	ENSDARG00000032714	0.089214945	2	1	1.846435584	-2.679911179	0	42.46101952	gria1b	165	0
502	ENSDARG00000032746	0.040507406	1	1	-2.358198128	-3.652086539	5.47E-83	19.26322348	tnfsf10l3	273	9.03E-82
503	ENSDARG00000032799	0.291392258	10	2	0.432167329	3.667768674	0	138.1939111	kcnd2	643	0
504	ENSDARG00000032868	0.081877865	10	2	0.220946474	4.787270742	0	38.82121699	pde4ba	2591	0
505	ENSDARG00000032876	0.034210033	15	1	-0.777652584	-0.266079588	1.33E-59	16.23938609	trit1	1782	1.86E-58
506	ENSDARG00000032990	0.068776343	1	1	-2.163450919	-3.185855431	1.34E-233	32.61314231	plxnb3	2897	3.73E-232
507	ENSDARG00000033056	0.063809946	3	2	-0.662289761	5.806050496	6.25E-204	30.44861085	zgc:171927	97	1.63E-202
508	ENSDARG00000033104	0.333889401	5	2	-1.787792645	6.44102736	0	158.5000919	tmc2a	308	0
509	ENSDARG00000033172	0.083257351	7	1	-1.30672463	-4.667595191	0	39.4815707	nr2f5	1685	0
510	ENSDARG00000033327	0.247211734	2	1	1.414063134	-2.185590906	0	117.1537366	unc5b	2769	0
511	ENSDARG00000033345	0.03805043	15	1	-0.587554715	0.59947093	3.30E-73	18.05987084	cntln	1591	5.10E-72
512	ENSDARG00000033411	0.384423099	5	2	-2.712798319	5.533613401	0	182.5530495	cabp1b	271	0
513	ENSDARG00000033437	0.041597943	4	1	2.124221601	-0.980474068	4.03E-87	19.74980265	rps6ka1	788	6.77E-86
514	ENSDARG00000033466	0.060507295	11	1	-0.1003552	-4.29598288	1.09E-181	28.71950723	tagln2	770	2.68E-180
515	ENSDARG00000033498	0.076780124	1	1	-2.167285643	-2.25421433	7.08E-291	36.43020215	rorb	713	2.27E-289
516	ENSDARG00000033614	0.046762734	1	1	-2.653801165	-3.996749682	2.05E-109	22.19205854	rasgef1ba	1082	3.88E-108
517	ENSDARG00000033683	0.033461106	18	4	18.15074853	-3.401178164	3.62E-57	15.8917145	tpma	747	4.94E-56
518	ENSDARG00000033840	0.133380963	11	1	-0.545328937	-3.448039575	0	63.2176284	fat3a	4646	0
519	ENSDARG00000033901	0.043985142	4	1	2.953519859	-0.297835512	4.56E-97	20.87460681	msi2a	1322	8.11E-96
520	ENSDARG00000033950	0.03746149	11	1	-0.380649529	-2.9932342	3.01E-71	17.80899774	lamb2l	548	4.58E-70
521	ENSDARG00000033978	0.03921567	7	1	-2.574546538	-5.995101256	1.41E-77	18.60710006	nxn	3822	2.24E-76
522	ENSDARG00000034080	0.035434388	1	1	-1.992073498	-3.268903298	8.02E-64	16.82490607	plcd1b	1059	1.16E-62
523	ENSDARG00000034117	0.092172625	7	1	-1.587911687	-4.994198604	0	43.6969221	rarga	3198	0
524	ENSDARG00000034138	0.053963305	10	2	0.422369905	4.016703801	3.70E-148	25.8959617	shisa2a	62	8.07E-147
525	ENSDARG00000034187	0.091465353	5	2	-2.046152793	5.047857957	0	43.44251072	calm1b	342	0
526	ENSDARG00000034229	0.157007289	2	1	0.789369978	-1.255452914	0	74.42404951	kcnip3a	1813	0
527	ENSDARG00000034268	0.230447002	9	1	2.668211498	-1.841379268	0	109.2027501	slit3	3880	0
528	ENSDARG00000034300	0.080373798	2	1	0.732866921	-0.151837869	0	38.147762	sema3c	512	0
529	ENSDARG00000034344	0.171310629	2	1	1.491587319	-2.127446813	0	81.18212455	pcdh19	5832	0
530	ENSDARG00000034424	0.235215825	8	2	-1.464217268	6.811479764	0	111.6262694	atp1b2b	380	0
531	ENSDARG00000034503	0.043377873	13	1	2.222990431	-3.578852219	1.62E-94	20.59191782	per2	868	2.85E-93
532	ENSDARG00000034522	0.039649221	12	2	-2.234549962	2.881260352	1.56E-79	18.84677262	rab6ba	329	2.52E-78
533	ENSDARG00000034541	0.033889162	16	1	3.99102334	-3.844111009	1.32E-58	16.09804016	tgfbr2b	635	1.83E-57
534	ENSDARG00000034555	0.065883649	15	1	-0.676222048	0.566452341	1.60E-214	31.23843787	pard3bb	8731	4.29E-213
535	ENSDARG00000034643	0.106711707	6	1	-4.06120225	-4.930718703	0	50.60427401	fhl3a	1197	0
536	ENSDARG00000034785	0.115038876	6	1	-3.544890843	-4.812242551	0	54.54123897	dachb	1536	0
537	ENSDARG00000034871	0.06831907	4	1	1.703057804	-0.787768966	1.62E-230	32.39485869	mid2	3985	4.50E-229
538	ENSDARG00000035056	0.038491168	4	1	2.367898979	0.22092958	7.29E-75	18.26913828	fgf13a	1446	1.14E-73
539	ENSDARG00000035161	0.284834777	2	1	0.880432763	-0.138577802	0	134.9930261	pkdcca	1836	0
540	ENSDARG00000035327	0.046746941	18	4	18.16411523	-3.414473815	2.39E-109	22.18510979	ckma	1056	4.52E-108
541	ENSDARG00000035389	0.043816924	3	2	-0.72329285	6.283927636	2.66E-96	20.79003652	fcho2	2092	4.72E-95
542	ENSDARG00000035398	0.040713118	14	1	4.651221075	-2.756716533	1.52E-83	19.32935626	enc1	795	2.52E-82
543	ENSDARG00000035452	0.087883513	5	2	-2.411258183	5.30124207	0	41.67784259	camkk1a	1449	0
544	ENSDARG00000035471	0.035089975	1	1	-2.773026429	-2.054529352	1.11E-62	16.66844787	si:dkey-220k22.1	714	1.60E-61
545	ENSDARG00000035521	0.06384269	7	1	-2.363693438	-5.830001635	9.41E-202	30.28364745	sfrp1a	1339	2.43E-200
546	ENSDARG00000035533	0.071487567	2	1	1.168921687	-2.225183887	1.88E-254	34.0522256	tacr1a	145	5.55E-253
547	ENSDARG00000035555	0.041348372	1	1	-2.671408854	-3.083084149	4.06E-87	19.74938995	gbgt1l3	112	6.83E-86
548	ENSDARG00000035560	0.115090779	5	2	-2.992015563	5.802494245	0	56.20108614	capga	21	0
549	ENSDARG00000035598	0.035361545	13	1	1.253088631	-3.776222033	1.69E-63	16.780763	coro1ca	4775	2.45E-62
550	ENSDARG00000035694	0.345716938	4	1	2.935495176	-0.50310616	0	163.8078263	stm	4506	0
551	ENSDARG00000035706	0.070556597	1	1	-2.149578772	-3.152310414	1.09E-245	33.4550798	dock6	3603	3.11E-244
552	ENSDARG00000035751	0.045857279	15	1	-0.723163508	-0.157139106	3.05E-105	21.75575744	ipo7	2534	5.65E-104
553	ENSDARG00000035809	0.143214604	11	1	-0.01668974	-4.762496037	0	67.91551188	col1a1b	1112	0
554	ENSDARG00000035870	0.130964023	8	2	-1.524503074	6.581374841	0	62.16300287	laptm4b	419	0
555	ENSDARG00000035970	0.055410125	12	2	-2.467081748	3.937611776	6.33E-153	26.31575771	ptprn2	471	1.40E-151
556	ENSDARG00000035990	0.034934057	13	1	1.773174562	-3.874218507	4.68E-62	16.58224266	cited4a	1819	6.71E-61
557	ENSDARG00000036036	0.068385415	9	1	2.123144187	-2.882033749	3.34E-231	32.44351555	mdka	1022	9.29E-230
558	ENSDARG00000036065	0.033573839	1	1	-2.231539212	-3.010466618	8.87E-58	15.97957818	mgat1b	222	1.22E-56
559	ENSDARG00000036168	0.065957305	13	1	2.687072315	-3.985901637	2.17E-215	31.30237147	nfatc1	633	5.81E-214
560	ENSDARG00000036175	0.14379441	16	1	4.025123395	-3.634997411	0	68.15039796	pcdh1b	4407	0
561	ENSDARG00000036179	0.046822259	1	1	-1.716948591	-2.392573519	1.27E-109	22.21361853	myo1ea	2245	2.40E-108
562	ENSDARG00000036279	0.066265036	2	1	0.417997562	-3.044498486	4.81E-217	31.42366875	lamc1	3122	1.30E-215
563	ENSDARG00000036541	0.049293676	10	2	0.465804346	3.788000302	3.06E-121	23.38463787	rhbdf1a	2287	6.11E-120
564	ENSDARG00000036548	0.062918199	10	2	0.470173069	2.57506557	4.80E-196	29.84703117	s1pr2	1505	1.22E-194
565	ENSDARG00000036558	0.2719296	6	1	-2.264073811	-4.547893567	0	128.8446791	col18a1a	9685	0
566	ENSDARG00000036571	0.131994463	9	1	3.148902931	-1.609535797	0	62.71487682	sema3e	246	0
567	ENSDARG00000036773	0.471417894	8	2	-1.473263107	7.552728849	0	223.8902834	s100s	280	0
568	ENSDARG00000036816	0.038598328	12	2	-1.56161233	2.363402562	2.78E-75	18.3215744	pou2f2a	1266	4.38E-74
569	ENSDARG00000036820	0.073581809	9	1	2.60341648	-1.894676192	3.03E-267	34.90589329	mgll	955	9.21E-266
570	ENSDARG00000036830	0.032276669	11	1	0.091761299	-5.058352752	1.01E-53	15.38663431	krt91	153	1.34E-52
571	ENSDARG00000036863	0.034805076	1	1	-2.155822716	-1.830860777	1.25E-61	16.52303338	MYO1D	1457	1.78E-60
572	ENSDARG00000036876	0.116676979	1	1	-2.062559329	-2.947927279	0	55.32482928	zgc:153284	1189	0
573	ENSDARG00000036966	0.038457644	5	2	-2.354402743	6.302027898	3.62E-75	18.30731169	hsd3b7	202	5.68E-74
574	ENSDARG00000036967	0.034331896	1	1	-2.73603364	-2.594518227	3.22E-60	16.32603017	smox	321	4.54E-59
575	ENSDARG00000036985	0.067031447	1	1	-2.446489535	-3.772907061	2.41E-222	31.80925849	plxnb2b	732	6.58E-221
576	ENSDARG00000036994	0.064016353	3	2	-0.571168743	6.01532145	2.14E-203	30.40821582	tbc1d16	347	5.57E-202
577	ENSDARG00000037018	0.052032288	13	1	1.503590383	-3.427048488	9.22E-135	24.67798665	gab1	5095	1.93E-133
578	ENSDARG00000037030	0.182685335	3	2	0.02770377	5.074651437	0	86.64207035	casz1	722	0
579	ENSDARG00000037109	0.057186181	15	1	-0.815010152	-0.30433814	2.29E-162	27.12824878	pwp2h	1591	5.26E-161
580	ENSDARG00000037122	0.416120243	5	2	-2.390768014	5.357189374	0	197.2775906	TENM2	908	0
581	ENSDARG00000037196	0.052961602	2	1	0.421454914	-2.686215444	1.57E-139	25.11818502	arid5b	5239	3.35E-138
582	ENSDARG00000037256	0.054966697	3	2	0.409113773	7.232446866	1.78E-157	26.71035216	si:ch211-145b13.5	23	4.00E-156
583	ENSDARG00000037267	0.094373083	8	2	-1.433315836	7.453439908	0	44.84354517	zgc:158263	264	0
584	ENSDARG00000037383	0.131350042	2	1	1.166984596	-0.791078603	0	62.32222126	pax5	516	0
585	ENSDARG00000037415	0.09875962	14	1	5.354517736	-3.006712241	0	46.88700866	dlgap1b	393	0
586	ENSDARG00000037421	0.03889215	13	1	2.238203086	-3.644519849	2.11E-76	18.46141222	egr1	1252	3.33E-75
587	ENSDARG00000037455	0.079409648	1	1	-1.962601386	-2.443481727	0	37.65775164	ugt8	1664	0
588	ENSDARG00000037476	0.086362512	4	1	2.468470849	0.638332086	0	40.99905247	sorbs3	496	0
589	ENSDARG00000037487	0.046528732	5	2	-2.627524338	5.735834794	6.67E-110	22.2424728	1-Mar	82	1.26E-108
590	ENSDARG00000037495	0.0571741	5	2	-2.736145936	5.845072942	3.17E-166	27.45333028	rtn4rl2b	52	7.37E-165
591	ENSDARG00000037498	0.054948159	7	1	-2.326155863	-6.203466697	1.46E-150	26.1086018	gria3b	354	3.20E-149
592	ENSDARG00000037517	0.040359115	9	1	2.690357484	-2.809867782	3.65E-82	19.16462043	slc35c2	698	5.99E-81
593	ENSDARG00000037593	0.410120864	5	2	-1.937920771	5.391135411	0	194.392402	prickle2b	1224	0
594	ENSDARG00000037655	0.039616358	11	1	0.220827166	-3.757027192	3.95E-79	18.79766853	pls3	3351	6.37E-78
595	ENSDARG00000037790	0.626818076	3	2	0.423252099	7.176339345	0	297.6885069	pvalb8	305	0
596	ENSDARG00000037815	0.053341476	2	1	1.452079811	-2.969448132	1.22E-141	25.31069841	b4galt5	1127	2.61E-140
597	ENSDARG00000037845	0.164559635	9	1	3.113046922	-3.234186454	0	78.02364819	col9a3	1002	0
598	ENSDARG00000037879	0.058216329	4	1	1.884410538	0.112182694	2.47E-168	27.62937426	lfng	747	5.78E-167
599	ENSDARG00000037889	0.036501649	7	1	-1.948870383	-5.134179397	6.34E-68	17.37539413	wnt9b	195	9.46E-67
600	ENSDARG00000037905	0.038181183	12	2	-2.096420727	3.318214612	6.43E-74	18.14995053	cacna1aa	361	1.00E-72
601	ENSDARG00000038159	0.059843529	2	1	0.580725588	-0.612061901	1.89E-177	28.37789889	tcf7l1a	5856	4.59E-176
602	ENSDARG00000038213	0.062914404	1	1	-2.994971238	-2.392335935	3.40E-196	29.85851981	slc35b1	649	8.69E-195
603	ENSDARG00000038424	0.037392671	12	2	-1.441787921	2.226971345	7.37E-72	17.8875541	c4b	92	1.13E-70
604	ENSDARG00000038428	0.062566576	7	1	-1.981592141	-5.204199119	6.20E-194	29.68386191	sulf1	1001	1.57E-192
605	ENSDARG00000038445	0.063558206	14	1	5.251428403	-2.941272063	3.08E-202	30.32049984	spire1b	129	7.96E-201
606	ENSDARG00000038446	0.052088622	2	1	0.828661062	-0.933551742	4.14E-135	24.71034095	nrp2b	1821	8.71E-134
607	ENSDARG00000038655	0.060719305	14	1	5.046080865	-2.643313689	1.83E-185	29.02027382	ajap1	91	4.53E-184
608	ENSDARG00000038672	0.049568433	6	1	-3.225019179	-4.701363845	7.80E-123	23.540776	tcf7	543	1.57E-121
609	ENSDARG00000038788	0.043903665	3	2	0.200012762	5.399816232	1.94E-97	20.91548657	dnai1.2	159	3.45E-96
610	ENSDARG00000038793	0.03422863	3	2	0.385881223	5.914808946	7.34E-60	16.27574732	ccdc24	320	1.03E-58
611	ENSDARG00000038891	0.070789286	1	1	-2.964363537	-1.647026939	1.01E-252	33.93522006	AL954146.1	61	2.95E-251
612	ENSDARG00000038990	0.193393192	7	1	-2.068479024	-5.516668601	0	91.69719039	wnt3	902	0
613	ENSDARG00000039041	0.137110448	14	1	4.414065637	-2.439667029	0	65.0243972	sfrp5	814	0
614	ENSDARG00000039069	0.038245522	15	1	-0.578020237	0.617331462	5.16E-74	18.1620208	slx4ip	769	8.04E-73
615	ENSDARG00000039116	0.047826021	1	1	-2.974930249	-1.529328747	1.67E-156	26.62654834	nr5a5	5	3.74E-155
616	ENSDARG00000039133	0.070151153	6	1	-3.147340022	-5.491045279	5.37E-244	33.33839396	lamb4	285	1.53E-242
617	ENSDARG00000039196	0.080699835	2	1	1.120276131	-1.400865359	0	38.27124736	greb1l	1374	0
618	ENSDARG00000039264	0.197603626	14	1	5.421613492	-3.116531176	0	94.55631355	igfbp5a	77	0
619	ENSDARG00000039272	0.105358538	5	2	-1.410178624	5.384422975	0	50.04750105	pls1	278	0
620	ENSDARG00000039373	0.059351599	6	1	-4.086503707	-4.929206176	8.60E-175	28.16175396	epha3	914	2.06E-173
621	ENSDARG00000039429	0.097806497	15	1	-0.595216773	0.161313491	0	46.3645395	adka	3985	0
622	ENSDARG00000039497	0.07958211	2	1	1.740641632	-2.720197244	0	37.80502631	ccdc85a	300	0
623	ENSDARG00000039563	0.110478236	7	1	-0.920379482	-4.886380715	0	52.37574193	loxl3b	2259	0
624	ENSDARG00000039576	0.050388562	7	1	-2.4222643	-5.84539823	1.49E-126	23.90124825	fstl1b	3245	3.01E-125
625	ENSDARG00000039579	0.055122256	9	1	2.678911962	-2.6662008	1.50E-159	26.8883983	cfd	28	3.41E-158
626	ENSDARG00000039669	0.034855282	1	1	-1.91136118	-2.758911772	4.74E-62	16.58153936	TSTA3	295	6.79E-61
627	ENSDARG00000039729	0.28712241	3	2	0.061120905	5.162754254	0	136.1020421	asap1b	1288	0
628	ENSDARG00000039881	0.098034594	14	1	5.120731153	-2.770499749	0	46.49816764	cemip	941	0
629	ENSDARG00000039914	0.064034395	10	2	0.31978377	4.495058255	3.22E-203	30.39475192	gapdhs	633	8.38E-202
630	ENSDARG00000039966	0.121403437	4	1	1.758468785	-0.873535139	0	57.54425593	prom1a	3316	0
631	ENSDARG00000039987	0.062491151	13	1	2.00716988	-3.76828937	2.82E-193	29.63287578	hivep2a	4682	7.12E-192
632	ENSDARG00000040008	0.077424657	5	2	-2.066918097	4.919246869	2.67E-300	37.0205565	neurod6a	80	8.75E-299
633	ENSDARG00000040009	0.069493232	1	1	-1.796525202	-2.702903314	1.68E-238	32.95702305	palld	2091	4.72E-237
634	ENSDARG00000040048	0.104053442	17	3	-3.195512734	0.785587626	0	49.40751639	GALNTL6	363	0
635	ENSDARG00000040087	0.047609559	7	1	-2.159505091	-5.520687385	2.45E-113	22.59449109	epb41l4a	1053	4.74E-112
636	ENSDARG00000040123	0.398464763	9	1	3.29409007	-3.838533444	0	188.8503207	zfpm2a	1459	0
637	ENSDARG00000040135	0.036050692	9	1	3.051165142	-2.069707675	5.48E-66	17.117619	fosaa	912	8.08E-65
638	ENSDARG00000040198	0.046903407	12	2	-2.123135529	3.124890046	1.03E-110	22.3260718	fstl5	198	1.96E-109
639	ENSDARG00000040214	0.033494785	17	3	-3.236474238	0.640910821	1.75E-71	17.83929492	scrt1b	6	2.67E-70
640	ENSDARG00000040237	0.03879938	1	1	-2.896853648	-3.195131106	5.23E-76	18.41230345	mef2d	2189	8.25E-75
641	ENSDARG00000040261	0.176686804	6	1	-3.798168383	-4.91757278	0	83.80913073	runx2a	631	0
642	ENSDARG00000040284	0.033652787	1	1	-2.466854058	-2.071514053	7.60E-58	15.98919252	si:dkey-79d12.5	581	1.05E-56
643	ENSDARG00000040291	0.464063405	1	1	-2.720422946	-1.893395705	0	219.8802355	cadm4	4157	0
644	ENSDARG00000040306	0.289136315	9	1	3.105918683	-1.496942682	0	137.0265138	otomp	2029	0
645	ENSDARG00000040442	0.050663046	2	1	0.545808651	-0.381114406	3.22E-128	24.06078874	prtgb	463	6.59E-127
646	ENSDARG00000040452	0.035159071	1	1	-2.784061633	-1.730210347	8.10E-63	16.6873447	fam214a	2327	1.17E-61
647	ENSDARG00000040482	0.037885103	8	2	-1.838642798	7.369590955	1.25E-72	17.98636207	osbpl3b	1023	1.92E-71
648	ENSDARG00000040535	0.042892214	2	1	1.201625802	-1.009662261	1.32E-92	20.37759604	csgalnact1a	420	2.30E-91
649	ENSDARG00000040565	0.034842736	18	4	18.19403199	-3.444870038	8.43E-62	16.54686834	ckmb	763	1.20E-60
650	ENSDARG00000040606	0.148475995	6	1	-2.55841466	-4.895489497	0	70.39479237	tfap2c	1192	0
651	ENSDARG00000040623	0.076218528	13	1	1.940376081	-3.788533015	2.67E-286	36.14003721	fosl2	2686	8.43E-285
652	ENSDARG00000040717	0.066289522	1	1	-1.856888257	-2.538898153	2.59E-217	31.44331488	macc1	1486	7.00E-216
653	ENSDARG00000040777	0.056914779	13	1	3.143693485	-3.949450536	4.19E-161	27.02101478	inhbb	522	9.57E-160
654	ENSDARG00000040912	0.064910422	16	1	3.838961639	-3.840245767	3.16E-209	30.84605901	kdelr3	270	8.37E-208
655	ENSDARG00000040917	0.064009029	6	1	-3.194938622	-4.88266377	7.99E-203	30.36487915	cbfb	1195	2.07E-201
656	ENSDARG00000040920	0.077302768	2	1	1.307295837	-1.525472743	1.13E-294	36.66918787	si:dkey-49n23.1	956	3.66E-293
657	ENSDARG00000041011	0.031120882	5	2	-1.781096182	4.546438413	3.94E-81	19.04042263	gemin7	4	6.44E-80
658	ENSDARG00000041113	0.041919026	15	1	-0.590130113	0.142280297	2.47E-88	19.89023711	wdr18	2336	4.19E-87
659	ENSDARG00000041117	0.049359463	14	1	5.043558397	-2.96809916	1.11E-122	23.52591019	wnt2	137	2.22E-121
660	ENSDARG00000041431	0.039639447	14	1	4.584502496	-2.037733836	6.00E-99	21.08057009	slc24a1	8	1.08E-97
661	ENSDARG00000041546	0.041724603	5	2	-1.71744176	4.767873483	5.11E-89	19.9691616	gypc	75	8.69E-88
662	ENSDARG00000041572	0.128033517	2	1	0.917291262	-1.410902185	0	60.69103619	zfpm1	2230	0
663	ENSDARG00000041723	0.052747046	3	2	-0.047267876	5.591222005	7.06E-140	25.15001502	zgc:55461	116	1.51E-138
664	ENSDARG00000041728	0.032755309	1	1	-2.953095875	-2.195985718	8.24E-55	15.54776732	man1a2	2617	1.11E-53
665	ENSDARG00000041750	0.081905651	3	2	0.599560805	5.900797563	0	38.89903057	ccdc92	372	0
666	ENSDARG00000041776	0.1569079	8	2	-0.480799459	7.44508286	0	74.44179109	ndst3	530	0
667	ENSDARG00000041791	0.170598539	7	1	-1.69813963	-4.952360434	0	80.87127881	mgat4c	1433	0
668	ENSDARG00000041869	0.085458952	7	1	-1.554905377	-4.741519732	0	40.51819803	tnfrsf19	2552	0
669	ENSDARG00000041895	0.045098455	15	1	-0.824207864	-0.332087202	6.11E-102	21.40412538	cad	1140	1.12E-100
670	ENSDARG00000041926	0.039329486	8	2	-1.747487031	7.486304479	8.35E-79	18.75788344	dlg4a	134	1.34E-77
671	ENSDARG00000041982	0.104029734	7	1	-1.204554282	-4.874893708	0	49.33130621	adamts6	1255	0
672	ENSDARG00000042033	0.037501289	18	4	18.16575746	-3.416362328	6.37E-158	26.74881678	mettl11b	3	1.43E-156
673	ENSDARG00000042114	0.046976265	5	2	-1.864597998	5.072240548	1.28E-111	22.41924474	bin1a	108	2.45E-110
674	ENSDARG00000042141	0.52138656	10	2	0.491915427	4.151047902	0	247.0865564	myo6b	1701	0
675	ENSDARG00000042210	0.03494383	2	1	1.029643752	-0.219958587	2.94E-62	16.61011439	sema3ab	367	4.23E-61
676	ENSDARG00000042213	0.260676999	17	3	-3.332758389	0.772479253	0	126.435481	si:ch211-233h19.2	30	0
677	ENSDARG00000042236	0.034005555	15	1	-0.620059631	0.144064264	6.81E-59	16.13878151	atrx	3915	9.51E-58
678	ENSDARG00000042277	0.375725079	6	1	-2.813796959	-4.911944671	0	178.0232466	efnb3b	4787	0
679	ENSDARG00000042390	0.071337075	14	1	4.829329767	-2.375616236	6.50E-256	34.15080646	syndig1l	78	1.93E-254
680	ENSDARG00000042518	0.046268477	6	1	-3.724783145	-5.126744552	4.52E-107	21.94806811	hipk2	4093	8.43E-106
681	ENSDARG00000042525	0.044141925	10	2	0.416922741	2.798465209	3.61E-98	20.99544599	ebf2	264	6.48E-97
682	ENSDARG00000042548	0.106218959	3	2	-0.189677797	6.167149263	0	50.42012254	tpd52l1	408	0
683	ENSDARG00000042627	0.070048864	1	1	-1.231272421	-3.779339833	3.44E-242	33.2135076	nhsl1b	4688	9.78E-241
684	ENSDARG00000042824	0.07664264	3	2	0.703403719	6.882132249	4.78E-290	36.37777978	nfe2l2a	587	1.53E-288
685	ENSDARG00000042829	0.066828324	1	1	-1.822185717	-2.296266003	4.38E-222	31.79047383	si:dkey-30j22.1	250	1.19E-220
686	ENSDARG00000042835	0.033829603	10	2	0.47626447	2.70191093	2.40E-58	16.06080893	tfdp2	1457	3.33E-57
687	ENSDARG00000042874	0.033667655	1	1	-2.435612879	-2.53443162	6.41E-58	15.99977469	phlda2	469	8.85E-57
688	ENSDARG00000042904	0.033632633	6	1	-2.909453354	-5.52800159	1.13E-57	15.96457837	foxo3b	2163	1.55E-56
689	ENSDARG00000042925	0.04818391	1	1	-1.915177069	-1.909554167	2.59E-116	22.89529464	mfng	354	5.04E-115
690	ENSDARG00000042934	0.08612017	14	1	4.114166774	-2.612150712	0	40.85712268	ccn2a	779	0
691	ENSDARG00000042936	0.04107095	3	2	0.255726026	5.956131654	4.48E-87	19.74440516	fam228a	51	7.53E-86
692	ENSDARG00000043010	0.034326443	11	1	-0.271365605	-4.176476045	4.23E-60	16.30936287	camk2d1	752	5.97E-59
693	ENSDARG00000043128	0.036544443	1	1	-1.411113582	-2.2430896	8.94E-68	17.35565809	cldne	776	1.33E-66
694	ENSDARG00000043130	0.042824383	7	1	-1.864451371	-5.371961875	4.28E-92	20.32001394	notch2	2050	7.43E-91
695	ENSDARG00000043154	0.042450174	1	1	-2.875917397	-2.272561593	1.36E-90	20.14936527	ucp2	1034	2.35E-89
696	ENSDARG00000043210	0.037989238	7	1	-0.962694965	-4.753305955	5.68E-73	18.02982833	nfic	1821	8.77E-72
697	ENSDARG00000043226	0.118450679	4	1	2.625807084	0.362188296	0	56.20722637	nfixa	556	0
698	ENSDARG00000043242	0.085888736	4	1	1.70709125	-0.858752465	0	40.72443291	si:dkey-222f2.1	1936	0
699	ENSDARG00000043249	0.045673738	9	1	2.667129793	-2.91466002	3.36E-105	21.75122902	irf1b	181	6.23E-104
700	ENSDARG00000043257	0.113877705	8	2	-1.800648652	6.799420552	0	54.24439863	ckbb	132	0
701	ENSDARG00000043281	0.03263828	7	1	-1.953207217	-4.858230634	1.64E-54	15.50365869	stap2b	651	2.20E-53
702	ENSDARG00000043313	0.077083056	4	1	2.562965431	-0.200302346	7.13E-293	36.55610607	ank2b	1781	2.30E-291
703	ENSDARG00000043317	0.091590968	8	2	-0.454811059	7.02799912	0	43.53249313	kita	241	0
704	ENSDARG00000043342	0.065570274	9	1	3.125383892	-1.718288822	1.03E-213	31.17885013	gpx3	219	2.75E-212
705	ENSDARG00000043361	0.032525698	2	1	0.074862831	-0.424882961	4.48E-54	15.43894234	nck2b	2731	5.99E-53
706	ENSDARG00000043394	0.041587199	8	2	-1.319333397	6.652109819	2.41E-87	19.77574282	si:dkey-71h2.2	273	4.06E-86
707	ENSDARG00000043589	0.160786933	2	1	0.947122611	-0.811441889	0	76.23469481	ca4a	1017	0
708	ENSDARG00000043646	0.071866136	14	1	4.923894681	-2.505005283	4.02E-255	34.0974696	slc6a8	767	1.19E-253
709	ENSDARG00000043661	0.115189817	5	2	-2.558772765	5.45219584	0	54.66488827	cadpsa	499	0
710	ENSDARG00000043746	0.279189761	5	2	-2.184776269	5.332203107	0	132.3071946	nrxn3a	2378	0
711	ENSDARG00000043757	0.135364819	5	2	-1.509212218	5.65686913	0	64.15665877	ptbp3	4480	0
712	ENSDARG00000043799	0.071511259	16	1	3.921945848	-3.549819274	1.43E-252	33.92486002	zmp:0000000619	953	4.19E-251
713	ENSDARG00000043818	0.227125357	1	1	-2.923466645	-2.357111258	0	107.6746417	si:ch211-119c20.2	1143	0
714	ENSDARG00000043821	0.035634495	13	1	0.986407496	-3.740149302	1.88E-64	16.91050673	klf7b	3955	2.75E-63
715	ENSDARG00000044034	0.036716383	5	2	-1.658432565	4.483731942	6.67E-69	17.50410225	tmem86a	145	1.00E-67
716	ENSDARG00000044091	0.088992413	5	2	-1.930526696	5.949835019	0	42.33007393	pitpnab	187	0
717	ENSDARG00000044094	0.033050049	1	1	-2.653418503	-2.719208164	4.27E-56	15.73614646	gfpt2	226	5.79E-55
718	ENSDARG00000044125	0.044333188	1	1	-3.054064951	-2.044053955	9.16E-100	21.16929288	txn	99	1.66E-98
719	ENSDARG00000044161	0.043444955	12	2	-2.186104737	2.878616052	4.84E-95	20.65039405	grid1b	339	8.54E-94
720	ENSDARG00000044167	0.05848668	7	1	-0.930524908	-4.758575959	2.74E-170	27.79159659	padi2	388	6.45E-169
721	ENSDARG00000044261	0.196839797	2	1	0.646000125	-1.500801368	0	93.30707435	si:ch211-243g18.2	1613	0
722	ENSDARG00000044491	0.03390222	15	1	-0.492757402	0.852821426	1.25E-58	16.10134622	kif20a	814	1.74E-57
723	ENSDARG00000044532	0.165222362	13	1	2.599174299	-3.90083961	0	78.33598304	nr4a2b	1039	0
724	ENSDARG00000044574	0.188546646	7	1	-2.543064795	-6.015347285	0	89.34872895	rbms3	4941	0
725	ENSDARG00000044808	0.195778032	9	1	2.832130708	-1.423975809	0	92.78132372	slc4a4b	3062	0
726	ENSDARG00000044902	0.036934791	11	1	0.330950655	-3.816973014	4.48E-69	17.52665909	atp2b4	4020	6.74E-68
727	ENSDARG00000045006	0.061226234	5	2	-2.137309514	4.881456094	1.24E-185	29.03353192	ptprga	4848	3.08E-184
728	ENSDARG00000045036	0.037865172	6	1	-3.174018345	-5.288158698	1.65E-72	17.9706996	cdc42ep4b	1782	2.54E-71
729	ENSDARG00000045038	0.097403572	3	2	0.279312985	7.09865685	0	46.85367616	tekt3	45	0
730	ENSDARG00000045064	0.087995342	9	1	2.828948297	-1.755801005	0	41.72445018	ablim1b	1777	0
731	ENSDARG00000045145	0.112117525	14	1	5.116265573	-2.756716294	0	53.83481209	shisa9a	57	0
732	ENSDARG00000045268	0.272922738	4	1	2.486721792	0.684285598	0	129.4947101	tectb	418	0
733	ENSDARG00000045302	0.086358149	8	2	-1.462436042	6.940017896	0	41.12482328	smpx	137	0
734	ENSDARG00000045308	0.06330349	15	1	-0.599493049	0.201759057	2.27E-198	30.0256377	pola1	1800	5.82E-197
735	ENSDARG00000045401	0.038234524	2	1	0.032388978	-0.783774359	7.27E-74	18.14315456	mllt10	3078	1.13E-72
736	ENSDARG00000045408	0.040716542	1	1	-3.008218489	-1.484558923	1.16E-92	20.38378397	tagln	12	2.03E-91
737	ENSDARG00000045417	0.038280881	6	1	-2.872137986	-5.527896685	4.18E-74	18.17361946	fam49bb	991	6.52E-73
738	ENSDARG00000045486	0.035486494	11	1	-0.0408478	-3.941561265	6.12E-64	16.84090945	pawr	3770	8.91E-63
739	ENSDARG00000045519	0.045254369	1	1	-2.923284016	-3.275936408	9.50E-103	21.49076185	sfmbt2	551	1.75E-101
740	ENSDARG00000045556	0.04508582	4	1	1.470536746	-0.432396574	4.58E-102	21.41756477	OTUD7A	425	8.39E-101
741	ENSDARG00000045560	0.037073205	4	1	2.625061073	0.711274223	1.35E-70	17.72473341	mybpc1	91	2.05E-69
742	ENSDARG00000045594	0.086967451	5	2	-2.514322005	5.969893174	0	41.56640875	shisal1a	78	0
743	ENSDARG00000045639	0.096493198	12	2	-2.184987746	2.931738811	0	45.78055821	elavl4	675	0
744	ENSDARG00000045658	0.034187723	3	2	0.276378738	7.010059075	1.22E-59	16.24457472	msrb3	478	1.71E-58
745	ENSDARG00000045687	0.085580214	10	2	0.594543465	4.220733361	0	40.74384173	pdzrn4	144	0
746	ENSDARG00000045802	0.151342061	14	1	4.89415244	-2.403290791	0	72.0463222	hapln3	159	0
747	ENSDARG00000045804	0.035433249	3	2	0.404498346	7.167614179	9.38E-65	16.95149851	abhd2b	78	1.37E-63
748	ENSDARG00000045946	0.060450638	16	1	3.967351713	-4.215332789	2.77E-181	28.68706238	sec24d	778	6.79E-180
749	ENSDARG00000046107	0.035116651	12	2	-2.22701355	3.039188342	8.04E-63	16.68777289	caskin1	446	1.16E-61
750	ENSDARG00000046150	0.090207988	1	1	-2.864441119	-3.027543826	0	42.77043457	b4galnt4a	2177	0
751	ENSDARG00000051748	0.045417577	7	1	-2.260094367	-6.238969607	2.81E-103	21.5472792	ccnd2a	2626	5.17E-102
752	ENSDARG00000051762	0.035269354	4	1	3.026481428	0.265382009	2.19E-63	16.76519925	CABZ01080568.1	366	3.18E-62
753	ENSDARG00000051814	0.052007497	5	2	-2.639437161	5.427931981	6.25E-135	24.69369139	ptprz1a	530	1.31E-133
754	ENSDARG00000051876	0.378728091	5	2	-2.774034939	5.60592814	0	179.6300105	ush1c	562	0
755	ENSDARG00000051879	0.075405888	3	2	0.339134716	5.731019693	1.09E-281	35.84523006	abcc8	239	3.42E-280
756	ENSDARG00000051886	0.039754207	10	2	0.608639814	3.95887919	1.20E-79	18.86077774	ankrd11	7639	1.94E-78
757	ENSDARG00000051915	0.106194931	10	2	0.413198524	3.658226686	0	50.41916825	pde5ab	372	0
758	ENSDARG00000052027	0.129719799	1	1	-2.959897242	-3.318914695	0	62.05990549	tspan1	61	0
759	ENSDARG00000052061	0.156765656	2	1	0.40714226	-2.621965928	0	74.29098715	col4a6	7400	0
760	ENSDARG00000052063	0.081515744	2	1	0.34663298	-2.788804216	0	38.64732477	col4a5	3718	0
761	ENSDARG00000052091	0.044432143	7	1	-2.038353406	-5.766364856	6.11E-99	21.07966965	rbpjb	2916	1.10E-97
762	ENSDARG00000052094	0.076043632	11	1	-0.379465483	-3.028032823	5.19E-285	36.05789164	notch1b	2863	1.64E-283
763	ENSDARG00000052114	0.037597257	4	1	2.482864656	0.058263795	1.61E-71	17.84381402	crtc3	1868	2.47E-70
764	ENSDARG00000052131	0.047779258	4	1	2.516755857	0.239683943	4.93E-114	22.66528878	gli3	2929	9.53E-113
765	ENSDARG00000052139	0.069691009	1	1	-1.386073194	-3.381760878	9.15E-240	33.04507625	notch3	4123	2.58E-238
766	ENSDARG00000052242	0.08194986	16	1	3.789573707	-3.982026381	0	38.85155163	aff2	4353	0
767	ENSDARG00000052277	0.20676933	8	2	-1.320356212	7.629599767	0	98.05037548	cabp2b	825	0
768	ENSDARG00000052511	0.071188124	2	1	0.415197216	-0.886393381	4.44E-250	33.75546942	lin28b	3099	1.29E-248
769	ENSDARG00000052604	0.071650731	16	1	3.887936868	-4.138248725	1.36E-253	33.99410775	cpeb2	858	4.00E-252
770	ENSDARG00000052644	0.058347374	9	1	2.642141618	-2.742841525	2.82E-169	27.70775943	ca10a	486	6.61E-168
771	ENSDARG00000052648	0.043781224	12	2	-2.201192103	2.96925159	1.56E-96	20.81576563	hs3st4	297	2.77E-95
772	ENSDARG00000052654	0.102919729	7	1	-2.139174662	-6.221806807	0	48.78545323	thrab	4690	0
773	ENSDARG00000052721	0.074961478	15	1	-0.629396103	0.232953148	4.80E-277	35.5459369	prim2	2397	1.48E-275
774	ENSDARG00000052741	0.069044692	9	1	2.671047487	-2.74419467	1.07E-235	32.76075702	card11	740	2.99E-234
775	ENSDARG00000052826	0.228307566	6	1	-4.082051955	-4.904823108	0	108.2598226	runx3	764	0
776	ENSDARG00000052856	0.036470663	15	1	-0.883060895	-0.27544306	2.05E-67	17.30802273	khdrbs1a	2747	3.04E-66
777	ENSDARG00000052912	0.104212933	5	2	-1.813730202	4.699085908	0	49.75994939	si:dkey-57n24.6	89	0
778	ENSDARG00000052923	0.069440696	5	2	-2.171090804	6.358793454	3.65E-239	33.00325336	zgc:113162	259	1.03E-237
779	ENSDARG00000053003	0.03929162	4	1	1.881216206	-0.163180632	5.73E-78	18.65519486	slc35f1	834	9.14E-77
780	ENSDARG00000053074	0.143027119	3	2	0.257478832	5.11894341	0	67.95841224	gipc3	225	0
781	ENSDARG00000053200	0.03482294	1	1	-2.827336274	-2.31782846	5.63E-62	16.57117365	dis3l	231	8.05E-61
782	ENSDARG00000053215	0.064075583	3	2	0.712654092	6.955534654	1.66E-204	30.49205245	me1	176	4.35E-203
783	ENSDARG00000053254	0.072107012	18	4	18.14669541	-3.397150321	1.63E-256	34.19126668	mylpfa	2970	4.83E-255
784	ENSDARG00000053301	0.033063945	10	2	0.555282034	2.974257426	1.69E-58	16.08249902	insm1b	38	2.35E-57
785	ENSDARG00000053315	0.148102989	3	2	-1.273228131	6.061519818	0	70.36861485	tmprss3a	234	0
786	ENSDARG00000053318	0.039939826	14	1	5.39434699	-3.073940081	3.38E-81	19.04856449	lrrc6	124	5.52E-80
787	ENSDARG00000053381	0.041108535	3	2	-0.0439687	6.687207418	2.04E-85	19.55044301	plpp1a	274	3.41E-84
788	ENSDARG00000053487	0.054219983	3	2	0.244011486	6.287074285	1.80E-147	25.83486551	osbp2	146	3.92E-146
789	ENSDARG00000053499	0.040335959	4	1	2.0246915	-0.257092996	1.32E-82	19.21763735	isl2b	158	2.17E-81
790	ENSDARG00000053517	0.332675129	3	2	-0.142979823	5.230201917	0	157.7455596	EML5	730	0
791	ENSDARG00000053535	0.051429739	8	2	-1.034921728	7.529612737	2.63E-132	24.4482074	lmo7b	271	5.46E-131
792	ENSDARG00000053544	0.079489047	3	2	0.49671223	5.152070718	0	37.79961658	hspa4l	200	0
793	ENSDARG00000053644	0.056056433	3	2	0.102973707	5.674728589	4.25E-158	26.76392734	got1l1	92	9.60E-157
794	ENSDARG00000053713	0.063939523	3	2	0.006740682	5.079399304	2.83E-202	30.32327346	ccdc88c	2609	7.32E-201
795	ENSDARG00000053835	0.07142693	11	1	-0.064157001	-3.442973895	1.01E-251	33.86730661	plekhh1	4034	2.93E-250
796	ENSDARG00000053864	0.081003289	13	1	1.617785372	-3.704452557	0	38.40185034	elmsan1b	5843	0
797	ENSDARG00000053956	0.031860379	6	1	-2.536008082	-4.579540534	5.53E-52	15.12510039	sptbn2	1974	7.31E-51
798	ENSDARG00000054050	0.125922628	1	1	-2.928735457	-1.62995295	0	59.73603386	vsig8a	641	0
799	ENSDARG00000054137	0.246457257	16	1	4.026064195	-4.229065938	0	116.8304726	adgrg6	1184	0
800	ENSDARG00000054224	0.036432555	15	1	-0.621244155	0.259030299	2.78E-67	17.29033196	ipo11	2573	4.13E-66
801	ENSDARG00000054253	0.038926568	1	1	-1.741999946	-3.400455756	1.66E-76	18.47437752	sobpa	1735	2.63E-75
802	ENSDARG00000054318	0.037725828	5	2	-1.459982477	5.915365892	7.16E-73	18.01700557	stk33	103	1.10E-71
803	ENSDARG00000054352	0.034391774	3	2	-0.003022305	6.541577535	4.67E-61	16.44352532	lrrc9	88	6.61E-60
804	ENSDARG00000054378	0.085107462	6	1	-3.917463503	-4.645038171	0	40.36611846	pcbp3	1036	0
805	ENSDARG00000054454	0.096415317	2	1	0.839130856	-1.149084119	0	45.71484498	epha4a	1715	0
806	ENSDARG00000054572	0.074238333	3	2	-0.588222108	5.875170903	1.95E-273	35.31163986	wdr95	195	5.98E-272
807	ENSDARG00000054583	0.067475555	1	1	-2.726535521	-2.591079039	1.32E-225	32.04414363	mfsd6b	361	3.65E-224
808	ENSDARG00000054616	0.085359256	11	1	-0.047431163	-4.632011218	0	40.60467835	cldni	306	0
809	ENSDARG00000054619	0.070409989	2	1	0.457968004	-2.775281591	1.12E-244	33.38527864	fras1	4124	3.21E-243
810	ENSDARG00000054680	0.107460826	8	2	-0.803954206	7.49619122	0	51.47651483	chrna9	62	0
811	ENSDARG00000054749	0.108188221	2	1	1.411744632	-2.29504375	0	51.29087046	lmo4b	1958	0
812	ENSDARG00000054754	0.147009081	7	1	-1.624683939	-4.768014474	0	69.67207044	hs6st1a	4569	0
813	ENSDARG00000054931	0.03305218	13	1	1.485365786	-3.656201405	6.26E-56	15.71203227	ppp2r5b	393	8.46E-55
814	ENSDARG00000054978	0.035436307	13	1	2.930724658	-4.008253617	7.47E-64	16.82906582	kifc3	744	1.09E-62
815	ENSDARG00000055014	0.076471815	1	1	-2.973636351	-1.642312689	6.67E-293	36.55795207	si:dkey-33m11.8	75	2.15E-291
816	ENSDARG00000055052	0.040566601	4	1	2.48721198	0.377515035	6.43E-83	19.2548264	map2	1126	1.06E-81
817	ENSDARG00000055054	0.049663164	6	1	-3.314714394	-4.853478475	4.86E-123	23.56085219	bcl9l	1968	9.77E-122
818	ENSDARG00000055075	0.150000005	5	2	-2.205589495	5.183082776	0	71.14274821	svila	705	0
819	ENSDARG00000055128	0.123228006	3	2	0.595128395	6.885933595	0	58.48357073	armc4	473	0
820	ENSDARG00000055133	0.060256281	15	1	-0.469633482	0.83972724	4.98E-180	28.58622542	cenpf	1291	1.22E-178
821	ENSDARG00000055158	0.043733051	6	1	-3.855577193	-4.550084395	4.81E-96	20.76164415	prox1a	767	8.53E-95
822	ENSDARG00000055192	0.047256178	11	1	0.118927501	-5.093908591	4.26E-115	22.77282968	zgc:136930	44	8.28E-114
823	ENSDARG00000055229	0.041027569	2	1	1.055904843	-1.001352129	6.23E-85	19.49353138	ncs1a	434	1.04E-83
824	ENSDARG00000055255	0.041220992	17	3	-3.264322243	0.680783348	1.06E-85	19.58374168	pitpnm3	469	1.78E-84
825	ENSDARG00000055276	0.03758028	13	1	1.492555298	-3.797323985	1.65E-71	17.84259131	rel	1008	2.52E-70
826	ENSDARG00000055302	0.109009256	4	1	2.080462851	-1.118707998	0	51.70680271	grid2	799	0
827	ENSDARG00000055317	0.035317714	14	1	4.85125617	-2.360979838	1.42E-86	19.68612409	c1ql4b	4	2.38E-85
828	ENSDARG00000055349	0.099892724	9	1	3.082955636	-1.434336824	0	47.35517637	pknox2	3173	0
829	ENSDARG00000055373	0.191850131	4	1	2.06838838	0.546751456	0	90.92469818	sema3fb	2475	0
830	ENSDARG00000055589	0.404441752	3	2	0.567709424	6.974235253	0	192.1112797	s100t	267	0
831	ENSDARG00000055632	0.089511203	6	1	-3.987920962	-4.980944915	0	42.51077144	smtnl	353	0
832	ENSDARG00000055647	0.037079407	2	1	1.350273885	-2.458984299	6.68E-70	17.63462952	ftr82	324	1.01E-68
833	ENSDARG00000055672	0.067110472	10	2	0.397424974	4.425510125	5.16E-223	31.85760566	map3k10	516	1.41E-221
834	ENSDARG00000055678	0.043829726	11	1	0.246603808	-3.874809308	2.28E-96	20.79739242	akap12b	1937	4.05E-95
835	ENSDARG00000055715	0.066877994	1	1	-1.680920206	-2.819782538	2.16E-221	31.74026886	capn8	869	5.88E-220
836	ENSDARG00000055723	0.053024003	14	1	4.835508146	-2.302001877	1.29E-140	25.21747793	hsp70l	231	2.76E-139
837	ENSDARG00000055751	0.095791895	13	1	2.235650696	-3.633554025	0	45.4121953	fosb	3188	0
838	ENSDARG00000055839	0.129295778	5	2	-1.532192312	5.54032393	0	61.39798127	march4l	301	0
839	ENSDARG00000055852	0.057936454	8	2	-1.230868302	7.606367307	5.83E-170	27.76447578	mtnr1ab	62	1.37E-168
840	ENSDARG00000055854	0.286883783	13	1	2.560401	-3.916672749	0	135.9445846	nr4a3	3155	0
841	ENSDARG00000055875	0.073196726	6	1	-4.117474757	-4.862746758	1.23E-264	34.73358517	pag1	700	3.71E-263
842	ENSDARG00000056029	0.038538833	7	1	-1.618135772	-4.940743728	2.59E-75	18.32547434	cyp26c1	275	4.08E-74
843	ENSDARG00000056101	0.106965859	3	2	0.60829515	7.161826329	0	50.76252655	kcnd3	507	0
844	ENSDARG00000056133	0.122892896	10	2	0.576694675	4.007589536	0	58.46259226	kitb	170	0
845	ENSDARG00000056181	0.235300522	15	1	0.158112601	0.643655973	0	111.4966709	ncam1a	5941	0
846	ENSDARG00000056248	0.048003926	11	1	0.10002216	-5.07719831	2.62E-118	23.09469652	si:dkey-183i3.5	47	5.15E-117
847	ENSDARG00000056322	0.099447576	4	1	2.522690572	0.226406889	0	47.15641203	ldb3a	1325	0
848	ENSDARG00000056331	0.038336275	2	1	1.279238858	-1.142655371	2.12E-74	18.21085365	ahcyl1	549	3.31E-73
849	ENSDARG00000056386	0.110226178	5	2	-2.545356236	5.392281251	0	52.38808109	TMC1	255	0
850	ENSDARG00000056427	0.140773274	2	1	0.866810717	-1.431781096	0	66.71669646	auts2a	5345	0
851	ENSDARG00000056450	0.061622213	5	2	-1.707427226	6.234100061	1.81E-190	29.41409831	MANEAL	96	4.55E-189
852	ENSDARG00000056458	0.051115291	3	2	0.718684145	6.838732915	1.55E-134	24.65692258	lhfpl5b	39	3.24E-133
853	ENSDARG00000056490	0.039457245	2	1	2.034924545	-1.955518408	1.67E-78	18.72104419	zgc:110158	4557	2.67E-77
854	ENSDARG00000056519	0.153757237	3	2	-0.099288068	5.71095963	0	73.03470932	si:dkey-280e21.3	267	0
855	ENSDARG00000056525	0.062573855	13	1	1.177308061	-3.715428395	8.82E-194	29.67202374	bcar1	5019	2.23E-192
856	ENSDARG00000056554	0.064167535	1	1	-2.134000979	-3.108991666	5.97E-204	30.45009856	rap1gap	724	1.56E-202
857	ENSDARG00000056600	0.057434326	9	1	3.080537595	-1.952315016	8.07E-164	27.25108794	papss2b	1024	1.86E-162
858	ENSDARG00000056627	0.061252219	4	1	1.603150167	-0.943390625	4.74E-186	29.06666667	cxcl14	767	1.18E-184
859	ENSDARG00000056640	0.036651214	9	1	2.648087301	-2.735575838	1.99E-68	17.44177653	rpia	228	2.98E-67
860	ENSDARG00000056740	0.042674358	7	1	-1.331333123	-4.794232888	1.48E-91	20.2589514	tmeff1b	896	2.57E-90
861	ENSDARG00000056764	0.049504244	3	2	0.126840949	5.394294458	1.88E-122	23.5034437	hydin	627	3.77E-121
862	ENSDARG00000056783	0.058747836	4	1	2.135789909	-0.955378326	3.71E-171	27.863387	raraa	2326	8.73E-170
863	ENSDARG00000056922	0.130947884	16	1	4.23250822	-3.72354917	0	62.10112422	ltbp1	878	0
864	ENSDARG00000056950	0.03670626	9	1	2.666020193	-2.823021097	1.13E-68	17.47412667	epyc	198	1.69E-67
865	ENSDARG00000057013	0.043818073	12	2	-1.997791014	3.066034274	1.90E-96	20.80621595	cadm3	655	3.38E-95
866	ENSDARG00000057016	0.109188983	5	2	-2.680849276	5.851468282	0	51.77719993	cdc14ab	1278	0
867	ENSDARG00000057053	0.036355547	13	1	2.234954991	-3.804862304	4.83E-67	17.25845783	zgc:91976	1295	7.18E-66
868	ENSDARG00000057166	0.032870598	7	1	-2.194513045	-6.277022643	3.27E-55	15.6067536	lrmda	1317	4.42E-54
869	ENSDARG00000057276	0.038039757	7	1	-2.228042803	-6.123750491	2.55E-73	18.07415036	iqca1	418	3.95E-72
870	ENSDARG00000057353	0.04540115	1	1	-2.890671454	-2.150225086	2.11E-103	21.56059323	ehbp1l1a	561	3.88E-102
871	ENSDARG00000057403	0.039591434	6	1	-2.990827284	-4.992424769	3.98E-79	18.7971848	CR847953.1	791	6.42E-78
872	ENSDARG00000057408	0.077448786	1	1	-2.926777087	-1.594967825	0	37.58251764	CABZ01067232.1	25	0
873	ENSDARG00000057465	0.042195425	1	1	-2.470523797	-2.709085626	1.58E-89	20.02759145	gfpt1	1123	2.70E-88
874	ENSDARG00000057586	0.069876384	4	1	2.2762504	0.69346972	6.02E-242	33.19662753	sall3b	299	1.71E-240
875	ENSDARG00000057728	0.21072788	5	2	-1.943966351	6.327463346	0	100.0986966	slc17a8	249	0
876	ENSDARG00000057729	0.041239454	14	1	4.565794744	-2.604016824	8.00E-86	19.59826003	ephb6	379	1.34E-84
877	ENSDARG00000057737	0.113752373	5	2	-1.446797453	5.874933438	0	53.92417227	rxraa	2833	0
878	ENSDARG00000057782	0.045257445	2	1	0.457951896	-0.603414996	1.55E-102	21.46799178	baz2ba	6328	2.85E-101
879	ENSDARG00000057903	0.034564377	18	4	18.17429093	-3.425031705	5.78E-61	16.43058759	si:ch211-266g18.10	372	8.17E-60
880	ENSDARG00000057975	0.040700793	8	2	-1.554531298	7.148261266	1.59E-84	19.4454912	plcd4a	86	2.64E-83
881	ENSDARG00000057983	0.048382567	1	1	-2.127597056	-2.912016673	3.36E-117	22.98409401	svopl	454	6.57E-116
882	ENSDARG00000057986	0.039089501	15	1	-0.527449928	0.16821702	4.31E-77	18.54699553	ints8	4352	6.85E-76
883	ENSDARG00000058090	0.255506085	3	2	0.361953371	5.772699552	0	121.1283153	cfap57	1117	0
884	ENSDARG00000058108	0.096903379	10	2	0.512575485	4.108935075	0	45.97080184	eps8l2	730	0
885	ENSDARG00000058115	0.151986738	9	1	2.455528058	-2.217034979	0	72.02920748	fgfr2	5138	0
886	ENSDARG00000058147	0.085788356	3	2	0.190640137	6.829594808	0	40.84799133	dnajc5b	139	0
887	ENSDARG00000058154	0.088214545	2	1	0.895022966	-1.582	0	41.84861977	znf385c	760	0
888	ENSDARG00000058179	0.032112351	7	1	-2.1923699	-6.074119372	7.60E-53	15.25519566	ackr3b	682	1.01E-51
889	ENSDARG00000058206	0.173253811	1	1	-2.831101857	-2.25462429	0	82.21925004	si:ch211-153b23.5	449	0
890	ENSDARG00000058231	0.034155956	14	1	4.886562147	-2.29031877	1.67E-59	16.22527023	nt5c2b	654	2.34E-58
891	ENSDARG00000058259	0.223298435	7	1	-2.311485253	-5.955824656	0	105.8370222	celsr1b	1910	0
892	ENSDARG00000058280	0.035291745	3	2	0.191017449	5.609440522	7.66E-64	16.82756486	si:dkey-208b23.5	151	1.11E-62
893	ENSDARG00000058284	0.17404482	7	1	-1.481343232	-4.891989512	0	82.49538925	CT990561.1	1857	0
894	ENSDARG00000058322	0.035637171	2	1	0.662273325	-1.567646487	1.23E-64	16.93549978	enc3	465	1.80E-63
895	ENSDARG00000058336	0.0867727	4	1	2.811417856	-0.013213379	0	41.21372852	slc25a22b	327	0
896	ENSDARG00000058342	0.078408197	1	1	-2.231434546	-3.053003354	2.82E-303	37.20515627	grhl2a	640	9.25E-302
897	ENSDARG00000058365	0.042659888	10	2	0.510716535	3.407579618	5.68E-92	20.30611678	hspb8	208	9.85E-91
898	ENSDARG00000058538	0.036594024	15	1	-0.495882593	-0.335458858	6.61E-68	17.37299106	alcamb	1222	9.86E-67
899	ENSDARG00000058543	0.092580918	2	1	0.44494664	-2.862852139	0	43.89027982	lama5	3607	0
900	ENSDARG00000058606	0.043706468	13	1	2.383717575	-3.903399987	6.33E-96	20.74844602	sik1	811	1.12E-94
901	ENSDARG00000058690	0.050682294	10	2	0.208206594	4.612007337	4.22E-128	24.0495523	cgnb	1102	8.64E-127
902	ENSDARG00000058699	0.064005344	4	1	1.758067288	0.960735397	6.05E-203	30.37402225	tmeff2b	706	1.57E-201
903	ENSDARG00000058821	0.121970154	7	1	-2.011673413	-6.032512469	0	57.82133278	sema5a	1882	0
904	ENSDARG00000058960	0.056826786	4	1	2.97222475	-0.334563477	7.63E-162	27.08385214	otol1b	122	1.75E-160
905	ENSDARG00000058961	0.085979243	10	2	0.457575374	3.875159459	0	40.79524248	ngfa	656	0
906	ENSDARG00000058969	0.10169884	16	1	3.996977844	-4.285159631	0	48.23712793	cntnap2a	908	0
907	ENSDARG00000059043	0.051898305	6	1	-2.689984999	-4.736632867	2.36E-134	24.63994782	ntf3	560	4.92E-133
908	ENSDARG00000059058	0.035456159	17	3	-3.262612782	0.679198461	1.30E-64	16.93226464	vipr1b	135	1.90E-63
909	ENSDARG00000059064	0.03204245	6	1	-2.966106377	-5.08268909	1.33E-52	15.21856822	rassf3	871	1.76E-51
910	ENSDARG00000059067	0.039509923	3	2	0.258126092	7.057247357	5.45E-79	18.78052279	jupb	337	8.78E-78
911	ENSDARG00000059233	0.103381025	6	1	-3.919378958	-4.630923076	0	49.04581898	runx2b	625	0
912	ENSDARG00000059279	0.090936439	7	1	-2.051541768	-4.965022845	0	43.13598839	tfap2a	804	0
913	ENSDARG00000059327	0.050349704	2	1	1.268228568	-2.349771542	8.97E-127	23.92232907	gata2a	362	1.82E-125
914	ENSDARG00000059333	0.045122858	9	1	2.58515171	-1.400435163	5.86E-102	21.40607831	si:ch211-285f17.1	3592	1.07E-100
915	ENSDARG00000059362	0.049122311	9	1	2.677470245	-2.744352145	3.58E-122	23.47612807	cavin1b	97	7.16E-121
916	ENSDARG00000059438	0.117150877	9	1	2.970149316	-1.811459167	0	55.52968466	galnt18b	3393	0
917	ENSDARG00000059442	0.104472412	17	3	-3.333232604	0.772129731	0	49.75948389	smtnb	149	0
918	ENSDARG00000059473	0.082510308	9	1	2.375011482	-2.270815654	0	39.14313938	kank4	774	0
919	ENSDARG00000059483	0.090527789	2	1	0.972580649	-1.154448433	0	42.91455788	tead1b	5007	0
920	ENSDARG00000059558	0.257669431	4	1	2.384880819	0.507276373	0	122.1514141	tecta	1041	0
921	ENSDARG00000059707	0.039603154	4	1	1.491545238	-1.139975233	4.54E-79	18.79027154	ZNF423	4337	7.31E-78
922	ENSDARG00000059738	0.047394164	2	1	1.585259118	-2.126688762	3.17E-112	22.48113914	ptprsa	4404	6.10E-111
923	ENSDARG00000059747	0.053621368	10	2	0.494198896	3.147393899	2.52E-143	25.46319517	kcnj19a	488	5.44E-142
924	ENSDARG00000059773	0.060697046	1	1	-2.043058358	-2.96989016	1.56E-182	28.78698873	SRCIN1	2328	3.85E-181
925	ENSDARG00000059798	0.283948274	14	1	4.626600542	-2.55988769	0	134.7370099	kcnq1.1	406	0
926	ENSDARG00000059832	0.057784993	12	2	-2.141634188	3.042129474	5.26E-166	27.43493436	adgrb3	515	1.22E-164
927	ENSDARG00000059836	0.038708869	13	1	1.772721924	-3.873425288	9.68E-76	18.37897704	ddit3	872	1.53E-74
928	ENSDARG00000059885	0.122283825	5	2	-2.806977234	5.725086408	0	58.04987942	frmd3	381	0
929	ENSDARG00000059906	0.042478149	13	1	2.330507316	-3.751810355	1.23E-90	20.15440849	sdc4	2715	2.13E-89
930	ENSDARG00000059914	0.059529327	3	2	-1.185490809	6.125212865	1.99E-177	28.3760997	sdr42e2	127	4.82E-176
931	ENSDARG00000059939	0.075799733	12	2	-1.943947993	2.746496158	1.18E-283	35.97121766	dab1a	640	3.71E-282
932	ENSDARG00000059960	0.095302858	4	1	1.651466169	-0.187526746	0	45.17933208	plch2a	3558	0
933	ENSDARG00000059987	0.082865493	3	2	0.270586664	6.89432116	0	39.40791189	dnah12	204	0
934	ENSDARG00000059997	0.040527589	4	1	2.629814186	-0.00843863	1.72E-83	19.3231503	sv2ca	131	2.84E-82
935	ENSDARG00000060041	0.044886694	15	1	-0.639332316	0.240346031	4.87E-101	21.30717788	lig1	943	8.85E-100
936	ENSDARG00000060093	0.048610356	14	1	5.245010175	-2.932426495	5.49E-118	23.06262608	dapk1	1751	1.08E-116
937	ENSDARG00000060095	0.090834601	3	2	0.651837714	7.046622472	0	43.42518016	kcnb1	86	0
938	ENSDARG00000060102	0.077590357	11	1	-0.415241263	-3.590427203	1.43E-296	36.78805341	kank1a	3805	4.65E-295
939	ENSDARG00000060103	0.038042282	8	2	-1.624397717	7.407998281	3.03E-73	18.06463728	cpeb3	747	4.69E-72
940	ENSDARG00000060127	0.053400624	6	1	-4.078427992	-5.025549693	5.95E-142	25.33895618	adamts3	1122	1.28E-140
941	ENSDARG00000060148	0.037097984	4	1	2.012912907	-0.152234895	1.06E-69	17.60838173	sh3pxd2aa	1552	1.60E-68
942	ENSDARG00000060165	0.070908645	3	2	0.346972548	5.842235284	1.28E-249	33.72409685	dnah7	194	3.70E-248
943	ENSDARG00000060243	0.066182916	12	2	-2.228681288	3.386892514	6.43E-217	31.41439791	enox1	562	1.73E-215
944	ENSDARG00000060253	0.062906007	5	2	-1.712909303	4.546301084	2.35E-196	29.8708598	si:ch211-216b21.2	432	6.01E-195
945	ENSDARG00000060280	0.043010711	4	1	1.917383947	0.86818953	2.08E-93	20.46802573	pde9a	200	3.63E-92
946	ENSDARG00000060309	0.052419337	1	1	-1.183288537	-2.448207183	9.16E-137	24.86384303	srgap3	3093	1.94E-135
947	ENSDARG00000060372	0.128307587	16	1	3.997482576	-4.275224967	0	60.81625894	plxna2	3114	0
948	ENSDARG00000060374	0.049077212	5	2	-1.458772383	4.633697705	1.93E-120	23.30588571	ttll11	511	3.84E-119
949	ENSDARG00000060397	0.12939119	6	1	-2.432908021	-4.739822907	0	61.35859282	hhip	930	0
950	ENSDARG00000060415	0.050313247	1	1	-1.776962243	-2.594388885	2.57E-126	23.87843021	arhgef28a	955	5.20E-125
951	ENSDARG00000060452	0.035677452	9	1	3.055850067	-2.031557484	1.19E-64	16.93761663	sdk2b	1149	1.74E-63
952	ENSDARG00000060532	0.037702585	12	2	-1.760874949	2.607855039	4.16E-72	17.91938578	adam22	400	6.40E-71
953	ENSDARG00000060542	0.050302832	4	1	2.1130443	0.694737153	4.00E-126	23.85988379	lgr4	3579	8.09E-125
954	ENSDARG00000060609	0.185468421	1	1	-2.72777339	-2.325447483	0	87.97208392	cd109	632	0
955	ENSDARG00000060610	0.314244115	4	1	1.474500694	-0.340108259	0	148.889354	pcdh7b	10273	0
956	ENSDARG00000060631	0.117465051	3	2	-0.194469861	6.464147287	0	55.70334331	GARNL3	1042	0
957	ENSDARG00000060678	0.134051452	7	1	-1.394030057	-4.821795506	0	63.5496946	ndst2b	1621	0
958	ENSDARG00000060813	0.039058713	1	1	-1.717076145	-3.140187545	5.22E-77	18.53675922	plekha7a	1648	8.27E-76
959	ENSDARG00000060875	0.117685359	5	2	-1.882196866	4.697005468	0	55.91535897	pde1a	296	0
960	ENSDARG00000060893	0.04231401	2	1	1.141973712	-1.525448604	3.18E-90	20.10738884	col8a2	376	5.47E-89
961	ENSDARG00000060929	0.066083188	4	1	2.137712397	0.810508328	4.29E-216	31.3540332	rnf220a	876	1.15E-214
962	ENSDARG00000060933	0.148396148	3	2	-0.625091336	6.180003839	0	70.42511398	baiap2l2b	431	0
963	ENSDARG00000060941	0.268675509	3	2	-0.030359141	5.215513902	0	127.369787	ANKFN1	1053	0
964	ENSDARG00000060978	0.073716076	5	2	-2.880143605	5.606481748	1.29E-268	34.99600245	atp2a3	502	3.95E-267
965	ENSDARG00000060994	0.061980626	2	1	1.729329266	-1.545703394	3.73E-190	29.38956193	fbxw7	8829	9.37E-189
966	ENSDARG00000061017	0.139765633	4	1	2.942117013	-0.777914023	0	66.24798711	spns2	2436	0
967	ENSDARG00000061042	0.04709521	12	2	-2.161924801	2.95653482	2.43E-111	22.39062499	gabbr2	289	4.64E-110
968	ENSDARG00000061093	0.115432567	16	1	4.088380851	-4.143822474	0	54.72569988	phldb1a	1702	0
969	ENSDARG00000061099	0.134010081	10	2	0.550867208	3.155029492	0	63.52763277	nfasca	1899	0
970	ENSDARG00000061121	0.042501343	12	2	-1.67170795	2.463318544	8.17E-91	20.17468889	adgrl3.1	937	1.41E-89
971	ENSDARG00000061191	0.064213723	17	3	-3.309065304	0.755139546	9.08E-207	30.66224016	plekho1a	98	2.39E-205
972	ENSDARG00000061242	0.04051864	4	1	2.639086761	-0.289077802	8.49E-83	19.24044025	tuft1a	809	1.40E-81
973	ENSDARG00000061304	0.1103745	5	2	-2.403039656	5.469043927	0	52.44497093	ppp1r9a	249	0
974	ENSDARG00000061328	0.154405109	2	1	1.476825275	-2.013271494	0	73.17646321	cdon	4305	0
975	ENSDARG00000061335	0.153299704	4	1	1.484738626	-0.375888629	0	72.64972619	galnt1	6172	0
976	ENSDARG00000061345	0.036728953	13	1	2.635196247	-3.888231559	2.19E-68	17.43633871	wwp2	1139	3.27E-67
977	ENSDARG00000061348	0.035256697	16	1	3.918564596	-3.73643784	2.26E-63	16.76353027	adat1	346	3.27E-62
978	ENSDARG00000061352	0.05922826	7	1	-1.061779819	-4.702113671	5.74E-174	28.0943467	bcl11aa	1865	1.37E-172
979	ENSDARG00000061405	0.075028101	2	1	0.737069734	-1.514258904	8.90E-278	35.59327779	eva1a	892	2.75E-276
980	ENSDARG00000061424	0.033457332	1	1	-2.960481368	-2.260739727	2.71E-57	15.9098525	znf646	333	3.71E-56
981	ENSDARG00000061454	0.056528249	12	2	-2.262838326	2.919062333	1.08E-158	26.8149347	nrxn2a	1721	2.45E-157
982	ENSDARG00000061471	0.101680799	6	1	-3.754344664	-5.094504161	0	48.20055821	sema5ba	3637	0
983	ENSDARG00000061478	0.072850464	15	1	-0.425972663	-0.447850807	9.78E-262	34.54084088	igf2bp1	4523	2.93E-260
984	ENSDARG00000061479	0.046595821	12	2	-2.316594086	3.510516362	8.89E-109	22.12595403	thsd7aa	580	1.67E-107
985	ENSDARG00000061497	0.077760305	14	1	5.392371931	-3.064317508	6.63E-302	37.12021208	thsd7bb	102	2.18E-300
986	ENSDARG00000061517	0.037460061	12	2	-2.340722046	2.992607551	2.94E-71	17.81023552	lrp1bb	333	4.49E-70
987	ENSDARG00000061541	0.18759758	10	2	0.478149958	3.061426358	0	88.94690064	unc5db	964	0
988	ENSDARG00000061549	0.058901744	13	1	0.742112674	-3.912943406	3.11E-172	27.95203834	foxo1b	940	7.36E-171
989	ENSDARG00000061551	0.045680702	4	1	2.446547307	0.538118796	1.31E-105	21.79427845	rap1gap2a	145	2.44E-104
990	ENSDARG00000061560	0.123293404	14	1	4.691012659	-2.622765465	0	58.52201089	stim1b	440	0
991	ENSDARG00000061566	0.033174368	2	1	0.32087455	-1.356822504	3.39E-56	15.75073319	slc7a3b	1311	4.60E-55
992	ENSDARG00000061579	0.059453577	11	1	-0.102237038	-4.20030765	2.46E-175	28.20606527	myo1cb	1431	5.90E-174
993	ENSDARG00000061590	0.096330323	2	1	0.809673407	-2.067174477	0	45.66525737	cachd1	3904	0
994	ENSDARG00000061603	0.076728589	4	1	1.473416724	-0.606790228	4.50E-290	36.37946577	sorbs2b	3397	1.44E-288
995	ENSDARG00000061634	0.055451088	3	2	0.625128068	5.621764855	3.50E-156	26.59889242	aifm4	57	7.81E-155
996	ENSDARG00000061640	0.035718122	1	1	-1.066188894	-3.441263003	9.25E-65	16.95230424	sipa1l2	2427	1.36E-63
997	ENSDARG00000061647	0.117600877	12	2	-2.18380519	2.884457069	0	55.78700785	nrxn1a	708	0
998	ENSDARG00000061687	0.065311538	7	1	-2.307655535	-6.35497169	5.68E-211	30.97598028	atxn1a	1797	1.50E-209
999	ENSDARG00000061688	0.063926476	4	1	2.639389076	-0.367653353	3.12E-202	30.3200766	arvcfb	1933	8.05E-201
1000	ENSDARG00000061736	0.097141534	7	1	-0.951084815	-4.684311671	0	46.07241776	ank3a	1146	0
1001	ENSDARG00000061752	0.044190486	8	2	-0.694108151	6.733960347	6.34E-98	20.96867655	ripor2	1645	1.13E-96
1002	ENSDARG00000061759	0.03191574	2	1	-0.096947066	-0.640287591	3.72E-52	15.15119666	kdm6a	2082	4.92E-51
1003	ENSDARG00000061764	0.134150247	11	1	0.014874749	-4.196058793	0	63.58106507	ahnak	4783	0
1004	ENSDARG00000061817	0.348284289	8	2	-0.564623497	6.847513394	0	165.1041055	kif1aa	999	0
1005	ENSDARG00000061819	0.123660174	4	1	2.294408121	0.643113928	0	58.63650225	wscd2	1102	0
1006	ENSDARG00000061835	0.458861837	4	1	2.107307591	-0.932912203	0	218.5247145	zpld1a	119	0
1007	ENSDARG00000061836	0.050842269	9	1	2.484778442	-2.00079505	6.51E-129	24.12698223	nfixb	1012	1.34E-127
1008	ENSDARG00000061844	0.088275727	1	1	-2.108085118	-3.045143886	0	41.87746267	si:dkey-38p12.3	841	0
1009	ENSDARG00000061848	0.076215012	2	1	0.918889143	-1.669489605	2.11E-286	36.14649143	col15a1b	1352	6.69E-285
1010	ENSDARG00000061850	0.080887322	8	2	-0.416954718	7.410903173	0	38.54685145	si:dkey-19b23.13	113	0
1011	ENSDARG00000061862	0.033283838	10	2	0.432861589	3.093343215	1.62E-56	15.79733677	myo18ab	3449	2.20E-55
1012	ENSDARG00000061899	0.055737047	3	2	0.209051241	5.662580209	6.01E-156	26.57855458	iqub	112	1.34E-154
1013	ENSDARG00000061904	0.165271532	1	1	-1.686253152	-2.298380656	0	78.32855211	fhod3b	3638	0
1014	ENSDARG00000061918	0.087839789	5	2	-1.657408677	5.727724748	0	41.74155386	cplx2	260	0
1015	ENSDARG00000061940	0.050227552	8	2	-1.561629973	7.691380696	1.38E-126	23.90433666	htr4	203	2.80E-125
1016	ENSDARG00000061968	0.120087418	8	2	-0.356190882	7.406881528	0	57.33756199	myo1ha	89	0
1017	ENSDARG00000061976	0.087251009	4	1	1.988612809	0.825981455	0	41.36460301	sema6bb	3199	0
1018	ENSDARG00000062000	0.150719861	6	1	-2.946151219	-4.726089282	0	71.44861949	abtb2b	1597	0
1019	ENSDARG00000062003	0.065474546	1	1	-1.57518395	-2.889053388	6.08E-212	31.04794009	myo5b	3753	1.61E-210
1020	ENSDARG00000062020	0.095048466	16	1	3.933583059	-3.97914104	0	45.05566435	gse1	5359	0
1021	ENSDARG00000062023	0.042346184	13	1	0.89098648	-3.581468625	4.45E-90	20.09074815	fndc3bb	3238	7.63E-89
1022	ENSDARG00000062040	0.059450209	5	2	-2.858058892	5.62961884	1.24E-175	28.23023401	atp8b5a	468	2.99E-174
1023	ENSDARG00000062059	0.091029969	4	1	2.758478202	-0.387275023	0	43.18708533	si:ch211-236l14.4	737	0
1024	ENSDARG00000062080	0.102032008	5	2	-1.687228642	4.529378133	0	48.63277139	shc2	111	0
1025	ENSDARG00000062101	0.041795548	6	1	-3.792506896	-4.579676671	6.51E-88	19.84158885	iffo2a	868	1.10E-86
1026	ENSDARG00000062103	0.225193613	10	2	0.107134663	4.471738534	0	106.8493671	ankrd24	437	0
1027	ENSDARG00000062123	0.053635431	1	1	-2.411304436	-2.768968983	4.98E-143	25.43651739	agap1	7833	1.07E-141
1028	ENSDARG00000062152	0.032055353	15	1	-0.630973898	0.242254453	1.19E-52	15.22590132	chaf1a	829	1.58E-51
1029	ENSDARG00000062154	0.073168975	4	1	2.000359096	0.306489067	5.41E-264	34.69084029	dip2ca	5377	1.63E-262
1030	ENSDARG00000062165	0.07085635	5	2	-1.663442693	5.594283776	5.88E-249	33.67893664	tub	249	1.70E-247
1031	ENSDARG00000062178	0.101031234	2	1	1.138948955	-2.649601145	0	47.89510953	ripor1	2771	0
1032	ENSDARG00000062190	0.06696478	13	1	2.673797645	-3.952789826	1.34E-221	31.75534693	pde3b	2664	3.65E-220
1033	ENSDARG00000062220	0.080720653	4	1	1.610243358	-0.808278998	0	38.27026936	plekha7b	3565	0
1034	ENSDARG00000062268	0.178291336	2	1	0.472482242	-0.751078961	0	84.48768564	jarid2b	7458	0
1035	ENSDARG00000062319	0.13114961	1	1	-2.891412459	-3.239348216	0	62.50556833	si:dkey-103g5.3	110	0
1036	ENSDARG00000062355	0.057179997	3	2	-0.573072932	6.103233056	7.78E-164	27.25243134	axdnd1	125	1.80E-162
1037	ENSDARG00000062370	0.036200667	14	1	4.918162145	-2.831529541	6.12E-67	17.24486341	bcl2l13	193	9.07E-66
1038	ENSDARG00000062415	0.160753627	7	1	-2.291261159	-6.246227069	0	76.21254639	ctnnd2a	1259	0
1039	ENSDARG00000062420	0.199891515	9	1	2.483285226	-2.186776323	0	94.72568552	nfia	4270	0
1040	ENSDARG00000062430	0.158513811	13	1	2.649828948	-3.953562779	0	75.14200315	gpd2	1549	0
1041	ENSDARG00000062449	0.047241302	12	2	-2.171266757	3.155111032	4.42E-112	22.46647486	xpr1a	252	8.48E-111
1042	ENSDARG00000062469	0.035566291	4	1	2.568292894	0.363258081	3.15E-64	16.88018946	hipk3a	2368	4.59E-63
1043	ENSDARG00000062489	0.040494183	4	1	2.352673807	0.836455898	1.33E-82	19.21716598	8-Mar	1726	2.19E-81
1044	ENSDARG00000062510	0.091982219	7	1	-2.032344304	-5.667718215	0	43.62769521	bcl11ba	1142	0
1045	ENSDARG00000062517	0.05165445	6	1	-3.974719725	-5.115651412	5.34E-133	24.51322844	si:ch211-107n13.1	953	1.11E-131
1046	ENSDARG00000062518	0.039112503	10	2	0.489284404	3.991768556	2.51E-77	18.57610528	ulk1a	584	3.99E-76
1047	ENSDARG00000062573	0.115186116	6	1	-3.68189045	-5.1170433	0	54.59408227	znrf3	7266	0
1048	ENSDARG00000062577	0.042365204	11	1	-0.025654785	-3.624380631	3.83E-90	20.09813583	arhgap35a	5911	6.58E-89
1049	ENSDARG00000062579	0.351196328	6	1	-3.377978526	-5.060270591	0	166.3957307	kremen1	7708	0
1050	ENSDARG00000062590	0.104480368	11	1	-0.311065577	-4.567029996	0	49.52561566	pleca	4543	0
1051	ENSDARG00000062621	0.061240887	17	3	-3.371996604	0.818788843	3.81E-186	29.07418592	satb1b	541	9.47E-185
1052	ENSDARG00000062630	0.396934324	3	2	0.141972863	5.971561151	0	188.1964773	dnah9l	784	0
1053	ENSDARG00000062646	0.058355361	2	1	0.107079111	-0.704830511	6.54E-169	27.67736682	tet3	2582	1.53E-167
1054	ENSDARG00000062687	0.344604071	8	2	-1.782814942	7.397503095	0	163.5168814	kcnh7	452	0
1055	ENSDARG00000062693	0.737367968	3	2	-0.764703951	5.903720574	0	349.4183681	nrxn3b	1753	0
1056	ENSDARG00000062699	0.044299429	7	1	-1.171919189	-4.857879205	1.93E-98	21.02527062	nkain4	1216	3.46E-97
1057	ENSDARG00000062702	0.036123929	13	1	1.35025815	-3.555852456	2.50E-66	17.16317915	ankmy1	446	3.70E-65
1058	ENSDARG00000062707	0.057931604	13	1	2.038884797	-3.796477837	9.54E-167	27.49696899	plat	643	2.23E-165
1059	ENSDARG00000062711	0.044093092	8	2	-1.769993029	6.740832048	7.98E-98	20.95770864	gal3st1a	308	1.42E-96
1060	ENSDARG00000062788	0.13638402	1	1	-2.7428753	-2.517887993	0	64.84457936	irg1l	206	0
1061	ENSDARG00000062790	0.073653452	1	1	-2.489865265	-3.417625708	1.28E-267	34.9304236	CU639469.1	1544	3.91E-266
1062	ENSDARG00000062799	0.057560164	7	1	-2.063698493	-6.011835379	2.19E-164	27.29887314	baiap2a	3203	5.07E-163
1063	ENSDARG00000062801	0.048440179	13	1	0.834941723	-3.528471036	4.02E-117	22.97629483	erfl3	5007	7.86E-116
1064	ENSDARG00000062830	0.04314213	10	2	0.531231709	3.137702184	6.89E-103	21.50564452	tent5d	20	1.27E-101
1065	ENSDARG00000062831	0.07850993	13	1	1.254401006	-3.221290154	1.61E-303	37.220109	si:ch73-22o12.1	7115	5.32E-302
1066	ENSDARG00000062854	0.545643553	6	1	-3.333684407	-5.008382125	0	258.5162432	sdk1b	5387	0
1067	ENSDARG00000062880	0.145950134	17	3	-3.17660924	0.634645181	0	69.29174582	cntn3a.1	352	0
1068	ENSDARG00000062909	0.08853683	1	1	-1.957986794	-2.61208169	0	41.97206718	furina	4601	0
1069	ENSDARG00000062967	0.134673534	8	2	-1.290978394	7.513899999	0	64.04295734	kcng4a	182	0
1070	ENSDARG00000062970	0.032112538	11	1	-0.108876995	-4.469985289	6.64E-53	15.2640317	niban2a	562	8.81E-52
1071	ENSDARG00000062974	0.040176359	11	1	0.011432089	-4.775267167	1.43E-83	19.33242229	itga2.2	61	2.38E-82
1072	ENSDARG00000063001	0.036201661	10	2	0.002283968	4.170024114	1.78E-66	17.18302597	atp8a1	1758	2.63E-65
1073	ENSDARG00000063032	0.100877118	8	2	-1.618049942	7.677530484	0	47.95091484	dok6	248	0
1074	ENSDARG00000063040	0.228610782	3	2	-0.905274592	5.980919557	0	108.4079741	btbd11b	732	0
1075	ENSDARG00000063068	0.373930329	3	2	-0.238525889	5.257747369	0	177.2602338	syne1b	1015	0
1076	ENSDARG00000063075	0.057189124	2	1	0.650768347	-1.711538954	2.53E-162	27.12448834	soga1	2673	5.82E-161
1077	ENSDARG00000063097	0.033461903	6	1	-4.157066069	-4.940694137	1.91E-57	15.93162651	scube1	208	2.62E-56
1078	ENSDARG00000063133	0.140128657	16	1	4.205958166	-3.368021293	0	66.44244856	slc4a10a	1265	0
1079	ENSDARG00000063230	0.057165008	16	1	4.037938394	-4.295834823	2.47E-162	27.12533945	bmp7b	915	5.69E-161
1080	ENSDARG00000063295	0.062921794	11	1	-0.100682668	-4.621604009	3.75E-196	29.85529475	myh9a	1014	9.56E-195
1081	ENSDARG00000063299	0.077585077	3	2	-0.186702154	6.379885869	4.18E-297	36.8215324	pcloa	539	1.36E-295
1082	ENSDARG00000063310	0.079832907	8	2	-0.84204968	6.900402742	0	37.95453559	oxr1b	227	0
1083	ENSDARG00000063332	0.304727778	4	1	1.650140323	-0.741394876	0	144.3888021	shank3a	4433	0
1084	ENSDARG00000063361	0.082237715	10	2	0.278456502	4.666090207	0	39.00029323	si:ch211-1e14.1	1402	0
1085	ENSDARG00000063372	0.094343598	4	1	2.175131001	-0.948031796	0	46.17959377	zpld1b	25	0
1086	ENSDARG00000063390	0.04525345	11	1	-0.108974538	-3.555234475	1.56E-102	21.46771824	pvrl2l	4049	2.86E-101
1087	ENSDARG00000063411	0.146911907	3	2	-0.481324695	5.287451463	0	69.77319227	lrrc73	290	0
1088	ENSDARG00000063412	0.054119927	8	2	-1.525787793	7.324243741	4.21E-147	25.802009	cers1	128	9.17E-146
1089	ENSDARG00000063433	0.180200484	8	2	-0.548433207	7.379793363	0	85.59791659	atp2b2	273	0
1090	ENSDARG00000063437	0.145314784	17	3	-3.294902526	0.69462307	0	68.89158415	wnt9a	1457	0
1091	ENSDARG00000063474	0.03835499	8	2	-0.888604365	7.092651086	2.44E-74	18.20314439	arfgef1	1850	3.81E-73
1092	ENSDARG00000063538	0.090603908	2	1	1.578921117	-2.652065678	0	42.95769504	kalrnb	2246	0
1093	ENSDARG00000063568	0.081787718	8	2	-0.755615316	7.215205388	0	38.87721709	syt7a	232	0
1094	ENSDARG00000063614	0.105144161	5	2	-3.043276272	5.683696466	0	50.85420202	skor2	33	0
1095	ENSDARG00000063627	0.043172498	15	1	-0.841301404	-0.323044701	1.32E-93	20.49011337	bop1	1239	2.31E-92
1096	ENSDARG00000063631	0.032215226	11	1	0.032837116	-4.672591729	1.81E-55	15.64444305	VIT	59	2.45E-54
1097	ENSDARG00000063636	0.043459472	5	2	-1.863010369	6.094183164	3.23E-95	20.66999407	galnt11	253	5.70E-94
1098	ENSDARG00000063649	0.036962831	15	1	-0.582140349	0.254681902	3.51E-69	17.54059442	tead3b	3290	5.29E-68
1099	ENSDARG00000063661	0.047145883	1	1	-2.124899827	-3.749280972	3.35E-111	22.37628077	nuak2	1037	6.40E-110
1100	ENSDARG00000063701	0.036179138	1	1	-1.769971095	-3.745567365	2.11E-66	17.17317023	rreb1a	1682	3.12E-65
1101	ENSDARG00000063730	0.059173958	3	2	0.579811074	6.706859307	3.21E-174	28.1150285	osbpl6	329	7.65E-173
1102	ENSDARG00000063732	0.034840109	13	1	2.65639595	-3.980263038	4.14E-62	16.5897017	pde11a	184	5.93E-61
1103	ENSDARG00000063905	0.046656866	15	1	-1.276291333	-0.0855972	7.78E-109	22.13196116	mt-co1	4415	1.46E-107
1104	ENSDARG00000063921	0.037099489	15	1	-1.279686413	-0.0936902	1.13E-69	17.60474389	mt-nd5	3775	1.71E-68
1105	ENSDARG00000067537	0.327371498	3	2	-0.525691829	6.196655946	0	155.1976477	pcsk5a	923	0
1106	ENSDARG00000067545	0.048543201	2	1	0.67617593	-0.17656414	5.13E-118	23.06555057	adam19b	359	1.01E-116
1107	ENSDARG00000067676	0.035865218	3	2	0.104385339	6.594735818	2.57E-65	17.02750048	plcl1	1187	3.77E-64
1108	ENSDARG00000067729	0.074115339	6	1	-2.757348738	-4.696826978	7.38E-271	35.14319284	arid3c	2761	2.26E-269
1109	ENSDARG00000067741	0.033484177	13	1	1.303001084	-3.230216069	3.43E-57	15.89495256	itpkcb	1829	4.70E-56
1110	ENSDARG00000067824	0.176168144	4	1	2.569996633	0.626561718	0	83.56595675	cntnap3	630	0
1111	ENSDARG00000067829	0.083584564	14	1	4.972679891	-2.450952096	0	39.65363537	ppargc1a	878	0
1112	ENSDARG00000067831	0.037625738	5	2	-2.161334715	5.011966424	3.05E-73	18.06426197	tbata	53	4.71E-72
1113	ENSDARG00000067990	0.072672362	18	4	18.14886216	-3.399821563	1.64E-260	34.45912302	myhz1.1	2923	4.91E-259
1114	ENSDARG00000067995	0.032323501	18	4	18.15014008	-3.400852723	1.78E-53	15.34963183	myhz1.2	945	2.37E-52
1115	ENSDARG00000067997	0.046723966	18	4	18.13597802	-3.389138503	3.24E-109	22.17137407	myhz1.3	1308	6.12E-108
1116	ENSDARG00000068050	0.107043943	3	2	0.06355875	5.255808072	0	50.74322401	agbl4	2944	0
1117	ENSDARG00000068103	0.052200434	3	2	-0.313706062	5.960257249	1.27E-136	24.85083003	cfap45	171	2.67E-135
1118	ENSDARG00000068104	0.045849135	1	1	-2.361842356	-3.321999354	1.55E-105	21.78679419	CABZ01040999.1	332	2.87E-104
1119	ENSDARG00000068148	0.038383712	13	1	1.751960077	-3.436709685	1.82E-74	18.21911541	arrdc1a	1336	2.85E-73
1120	ENSDARG00000068247	0.068532422	4	1	2.623595275	-0.248215003	1.59E-232	32.53711866	luzp2	469	4.43E-231
1121	ENSDARG00000068323	0.03956695	12	2	-2.15386983	3.123218732	2.66E-79	18.81857787	astn1	291	4.30E-78
1122	ENSDARG00000068365	0.587287706	9	1	2.657047071	-2.135046167	0	278.2410819	lmx1bb	5335	0
1123	ENSDARG00000068398	0.037168208	8	2	-1.634468518	7.609224515	1.18E-71	17.86127856	cep126	55	1.81E-70
1124	ENSDARG00000068401	0.081527217	2	1	0.932689585	-2.386598391	0	38.65112242	yap1	4581	0
1125	ENSDARG00000068460	0.188504747	4	1	1.838076868	-0.569810016	0	89.34138133	otog	2379	0
1126	ENSDARG00000068461	0.174455518	6	1	-3.08014556	-4.808635754	0	82.67159678	aopep	6641	0
1127	ENSDARG00000068468	0.089985448	5	2	-2.253027402	6.192912774	0	42.85615992	dnah3	140	0
1128	ENSDARG00000068582	0.032251772	15	1	-0.180428378	0.249242025	3.25E-53	15.31052206	rnf44	2088	4.32E-52
1129	ENSDARG00000068678	0.065088065	3	2	-0.089653991	5.225941377	7.75E-212	31.04014584	iqcg	110	2.06E-210
1130	ENSDARG00000068711	0.044976947	7	1	-2.27640935	-6.278419299	1.81E-101	21.35341749	crfb4	745	3.30E-100
1131	ENSDARG00000068732	0.046556537	4	1	1.767988123	-0.11027394	1.98E-108	22.0898139	spry4	1752	3.72E-107
1132	ENSDARG00000068742	0.038369471	12	2	-2.07190343	2.854990201	1.68E-158	26.79846989	CR384085.1	2	3.81E-157
1133	ENSDARG00000068760	0.104784921	1	1	-1.782237015	-3.024956269	0	49.71332518	tnks1bp1	861	0
1134	ENSDARG00000068894	0.060856571	6	1	-3.213444911	-4.774354739	1.53E-183	28.86741494	nrip1b	1537	3.79E-182
1135	ENSDARG00000068934	0.055616329	9	1	3.034917392	-1.943285508	2.54E-154	26.43757711	cyp1b1	258	5.63E-153
1136	ENSDARG00000068965	0.051934054	6	1	-3.879374705	-4.582410378	1.99E-134	24.64683686	nrip1a	869	4.16E-133
1137	ENSDARG00000068967	0.034029336	2	1	0.902364888	-1.390537573	4.86E-59	16.15957088	zgc:153372	865	6.80E-58
1138	ENSDARG00000069011	0.086544965	5	2	-1.720984302	6.414826112	0	41.1931774	eps8b	150	0
1139	ENSDARG00000069093	0.535299908	9	1	3.084682502	-3.289186997	0	253.6240313	col2a1a	4432	0
1140	ENSDARG00000069113	0.062463222	7	1	-1.957560502	-5.689039512	3.39E-193	29.62669773	dbn1	1747	8.54E-192
1141	ENSDARG00000069134	0.034516434	5	2	-3.005740128	5.699290471	2.61E-62	16.61737555	vwc2l	48	3.75E-61
1142	ENSDARG00000069160	0.047525994	4	1	2.571966686	0.587495761	1.32E-113	22.62187541	tafa5a	194	2.55E-112
1143	ENSDARG00000069185	0.07516537	7	1	-2.14923688	-6.040941043	1.87E-278	35.6370881	celsr1a	4870	5.80E-277
1144	ENSDARG00000069196	0.150874989	7	1	-1.524519525	-4.885072274	0	71.51456007	ebf1b	2134	0
1145	ENSDARG00000069230	0.037725404	3	2	0.172375672	6.52910872	7.44E-73	18.01493094	zgc:153738	105	1.15E-71
1146	ENSDARG00000069262	0.051744745	5	2	-2.189580641	5.205655294	1.20E-134	24.66741033	erich3	128	2.51E-133
1147	ENSDARG00000069266	0.087571382	14	1	4.827684678	-2.458431287	0	41.61513799	esrra	286	0
1148	ENSDARG00000069296	0.198132333	1	1	-2.215997181	-2.128708286	0	94.05872366	moxd1l	411	0
1149	ENSDARG00000069356	0.180255316	2	1	1.731759824	-1.77143584	0	85.42034229	adgrl2a	5494	0
1150	ENSDARG00000069361	0.059613995	3	2	-0.585336707	6.268975453	7.18E-178	28.41205567	spa17	124	1.74E-176
1151	ENSDARG00000069374	0.065494938	5	2	-1.836490594	5.843234735	1.05E-213	31.17823991	sh2d4ba	156	2.81E-212
1152	ENSDARG00000069415	0.104025764	11	1	0.063941934	-5.008346839	0	49.78554111	col17a1a	73	0
1153	ENSDARG00000069427	0.076406908	12	2	-1.916401349	2.79690619	3.67E-288	36.25831459	nkain2	640	1.17E-286
1154	ENSDARG00000069435	0.164425094	3	2	0.301715795	5.402850824	0	77.99000242	cfap58	662	0
1155	ENSDARG00000069438	0.056201898	3	2	0.091356077	5.17214747	3.01E-157	26.69080746	neurl1aa	420	6.75E-156
1156	ENSDARG00000069440	0.23087005	2	1	1.742338457	-2.517156405	0	109.402404	dachd	3880	0
1157	ENSDARG00000069467	0.04592867	2	1	1.379370608	-2.328887386	8.85E-106	21.81236932	igsf9bb	497	1.65E-104
1158	ENSDARG00000069503	0.06482178	1	1	-1.788651429	-2.384446545	2.28E-208	30.78196263	cldnh	572	6.04E-207
1159	ENSDARG00000069560	0.047478243	5	2	-1.629616223	4.513776498	2.90E-113	22.58716943	kcnh3	232	5.58E-112
1160	ENSDARG00000069619	0.0335903	15	1	-0.336499951	0.567984538	1.58E-57	15.94359487	atf7ip	2558	2.17E-56
1161	ENSDARG00000069640	0.038346853	5	2	-3.061314545	5.643746572	8.25E-75	18.26238425	vegfc	173	1.29E-73
1162	ENSDARG00000069692	0.057578908	6	1	-4.052752696	-5.301551146	8.65E-167	27.50051744	col7a1l	106	2.02E-165
1163	ENSDARG00000069703	0.033843692	3	2	0.517873474	5.669364648	4.34E-60	16.30787952	efhb	43	6.11E-59
1164	ENSDARG00000069723	0.074281221	3	2	0.371600792	5.947076039	7.74E-274	35.33770718	zbbx	189	2.38E-272
1165	ENSDARG00000069733	0.049812465	14	1	4.826592245	-2.48449151	2.58E-128	24.07002338	mavs	34	5.28E-127
1166	ENSDARG00000069755	0.075894761	5	2	-2.01229497	4.859756665	2.02E-284	36.02012898	mtmr11	563	6.38E-283
1167	ENSDARG00000069766	0.101202443	14	1	4.932680406	-2.505753798	0	48.40955101	caln2	78	0
1168	ENSDARG00000069888	0.046987394	2	1	0.482310184	-1.425677223	1.22E-110	22.31873548	cldna	438	2.31E-109
1169	ENSDARG00000069912	0.06860875	2	1	0.674168505	-1.523860617	1.21E-232	32.54543473	hmga2	1181	3.39E-231
1170	ENSDARG00000069937	0.033665975	1	1	-1.958753548	-2.712341232	8.82E-58	15.97988697	dnm2a	2304	1.22E-56
1171	ENSDARG00000069940	0.101718702	4	1	1.655699529	-0.871886337	0	48.21959492	ppap2d	3023	0
1172	ENSDARG00000069946	0.156556922	6	1	-3.259001694	-4.925511641	0	74.23604659	itga6b	1040	0
1173	ENSDARG00000069954	0.448526765	4	1	2.685900964	0.38759573	0	212.5840356	kcnq5a	1390	0
1174	ENSDARG00000069956	0.12720203	4	1	2.41208414	0.486928897	0	60.35575938	pdlim2	546	0
1175	ENSDARG00000069989	0.075289417	9	1	2.761443414	-3.044216437	1.45E-279	35.70861898	bnc2	1353	4.53E-278
1176	ENSDARG00000070045	0.064811906	12	2	-2.108773909	3.023647266	4.62E-208	30.75907716	celf4	737	1.22E-206
1177	ENSDARG00000070050	0.07165592	2	1	1.145902492	-1.499699755	1.04E-253	34.00214266	sfrp2	651	3.05E-252
1178	ENSDARG00000070074	0.037057966	15	1	-0.495808564	0.851462202	1.58E-69	17.58605991	lrp8	2914	2.38E-68
1179	ENSDARG00000070080	0.056974861	12	2	-1.632541261	2.532069402	3.28E-161	27.02997223	nbeaa	1305	7.51E-160
1180	ENSDARG00000070100	0.138707241	4	1	2.328847446	0.64039691	0	65.79129136	si:ch211-168d1.3	669	0
1181	ENSDARG00000070141	0.104101557	6	1	-2.850215874	-4.702093167	0	49.38381272	si:ch211-191i18.2	679	0
1182	ENSDARG00000070228	0.089441009	2	1	0.479207062	0.018530505	0	42.40764553	cdk6	2158	0
1183	ENSDARG00000070339	0.04347423	6	1	-4.142691336	-4.899400277	5.53E-95	20.64395588	hoxc3a	589	9.74E-94
1184	ENSDARG00000070425	0.04760515	5	2	-1.5007964	4.832655149	1.05E-114	22.73308888	dll4	95	2.05E-113
1185	ENSDARG00000070440	0.134073025	8	2	-1.545015059	7.548910337	0	63.88236039	atp6v1c2	113	0
1186	ENSDARG00000070473	0.054738403	5	2	-1.829565011	5.465866761	1.16E-150	26.11740414	parp6b	104	2.55E-149
1187	ENSDARG00000070522	0.18601187	1	1	-2.861762248	-3.432051225	0	88.20941872	cacna1ia	762	0
1188	ENSDARG00000070536	0.366596747	7	1	-2.002181016	-5.131770892	0	173.7021494	creb5b	3901	0
1189	ENSDARG00000070567	0.065475684	12	2	-2.185769759	3.244258599	6.05E-213	31.12208437	cadpsb	266	1.61E-211
1190	ENSDARG00000070584	0.124826016	8	2	-0.825678788	7.143855291	0	59.40818215	clic5b	156	0
1191	ENSDARG00000070601	0.071095217	3	2	0.589835354	6.596559243	5.37E-251	33.81796839	RASSF5	197	1.56E-249
1192	ENSDARG00000070626	0.036654907	2	1	0.824560441	-1.585988922	2.05E-68	17.44004912	cacng8b	250	3.07E-67
1193	ENSDARG00000070651	0.049136517	13	1	1.178538062	-3.670158191	1.84E-120	23.30794027	prkcdb	3348	3.66E-119
1194	ENSDARG00000070681	0.046884545	2	1	1.552253522	-2.53966908	2.46E-110	22.28723667	c1qtnf12	367	4.67E-109
1195	ENSDARG00000070724	0.11315739	14	1	4.694517412	-2.210897608	0	55.71657952	chrna4b	20	0
1196	ENSDARG00000070787	0.051370776	11	1	0.080491446	-3.887176795	2.01E-131	24.36492777	jupa	5060	4.18E-130
1197	ENSDARG00000070794	0.077042614	2	1	0.364260912	-1.279177112	9.39E-293	36.5485877	greb1	864	3.02E-291
1198	ENSDARG00000070809	0.049342483	10	2	0.490230359	2.78274055	1.72E-121	23.40925655	znf516	2030	3.44E-120
1199	ENSDARG00000070835	0.034645153	18	4	18.16105584	-3.411514802	3.91E-61	16.45424865	tnnc2	680	5.54E-60
1200	ENSDARG00000070839	0.079072484	1	1	-2.602669678	-1.784872575	4.27E-308	37.50198994	evi5b	1450	1.43E-306
1201	ENSDARG00000070903	0.198079079	6	1	-3.225820504	-5.091658397	0	93.88296033	met	1976	0
1202	ENSDARG00000070917	0.075640727	4	1	1.993781723	0.067912893	2.56E-282	35.88564452	kitlga	804	8.03E-281
1203	ENSDARG00000070955	0.033756683	6	1	-3.768122397	-4.962796969	3.38E-58	16.03967977	hmx3a	473	4.67E-57
1204	ENSDARG00000071004	0.15359086	8	2	-1.676145516	7.350271421	0	72.85597629	abhd12	652	0
1205	ENSDARG00000071025	0.044781182	3	2	-0.21205052	5.111654954	2.34E-101	21.34154982	dytn	140	4.25E-100
1206	ENSDARG00000071091	0.122239814	5	2	-2.021170102	5.004172521	0	58.13285503	chrm3a	182	0
1207	ENSDARG00000071113	0.074652795	8	2	-1.245651923	7.635056691	3.09E-275	35.42864885	xirp2a	646	9.54E-274
1208	ENSDARG00000071196	0.158564107	1	1	-2.026499711	-3.34968142	0	75.15605969	cavin2b	2518	0
1209	ENSDARG00000071208	0.040515638	9	1	3.133286514	-1.60342787	5.01E-83	19.26777155	wnt4	268	8.27E-82
1210	ENSDARG00000071209	0.041946195	7	1	-1.731422744	-5.081009669	6.51E-89	19.95706272	oprl1	229	1.11E-87
1211	ENSDARG00000071213	0.120668498	1	1	-1.871349774	-2.767230077	0	57.25981785	rgl3a	618	0
1212	ENSDARG00000071217	0.039898852	3	2	0.173512064	6.855884748	6.04E-81	19.01807965	hs6st3a	138	9.86E-80
1213	ENSDARG00000071230	0.219702322	5	2	-1.946027718	5.08522244	0	104.2399311	lrfn5a	465	0
1214	ENSDARG00000071331	0.048432088	18	4	18.16499833	-3.415494962	3.15E-117	22.98690442	ryr3	823	6.17E-116
1215	ENSDARG00000071375	0.066597255	12	2	-2.205080948	2.909333186	1.93E-219	31.59855177	celf5a	858	5.25E-218
1216	ENSDARG00000071424	0.040030307	5	2	-1.814130984	6.224978643	8.01E-81	19.00330348	ap3d1	946	1.31E-79
1217	ENSDARG00000071501	0.042420603	11	1	-0.333205782	-3.497209592	2.15E-90	20.12675259	hs6st1b	3071	3.71E-89
1218	ENSDARG00000071506	0.047298334	1	1	-2.654920779	-3.13731627	8.48E-112	22.43747676	mgat5	2834	1.63E-110
1219	ENSDARG00000071562	0.115371753	3	2	-0.108796827	6.608149247	0	54.80709072	mtus1a	271	0
1220	ENSDARG00000071585	0.16127438	8	2	-1.351941071	6.546730237	0	76.54760426	stard15	384	0
1221	ENSDARG00000071601	0.350183861	8	2	-1.471945725	7.524419026	0	166.7843089	pvalb9	120	0
1222	ENSDARG00000071685	0.121335458	7	1	-2.458918295	-5.735593123	0	57.52518316	slco5a1a	1576	0
1223	ENSDARG00000071692	0.043800941	4	1	2.170865216	-0.796206964	2.24E-96	20.7982721	prex2	614	3.98E-95
1224	ENSDARG00000071697	0.03366903	7	1	-1.518442355	-4.691217942	6.96E-58	15.99463101	zgc:66433	613	9.61E-57
1225	ENSDARG00000071772	0.038635031	5	2	-1.934330426	5.398622708	2.59E-76	18.45038384	si:ch211-253p2.2	99	4.09E-75
1226	ENSDARG00000073688	0.192682043	2	1	0.603593119	-1.586500151	0	91.32432618	nav2a	2215	0
1227	ENSDARG00000073699	0.177295828	9	1	3.108641662	-3.354355378	0	84.08282976	col9a1a	711	0
1228	ENSDARG00000073709	0.042562886	5	2	-2.834918461	5.577945905	3.27E-92	20.33322295	fam149a	96	5.68E-91
1229	ENSDARG00000073711	0.036559144	17	3	-3.364973269	0.779923992	7.85E-72	17.884061	mmrn2b	20	1.20E-70
1230	ENSDARG00000073713	0.094488617	8	2	-1.962654791	6.994580941	0	44.8715182	vav3b	337	0
1231	ENSDARG00000073728	0.25330442	4	1	2.440223255	0.579400139	0	120.0439054	gal3st3	2199	0
1232	ENSDARG00000073732	0.044480938	3	2	0.259883302	5.809638219	3.00E-99	21.11332117	myh14	926	5.43E-98
1233	ENSDARG00000073752	0.08914014	14	1	4.453954019	-2.82967536	0	42.36689792	CACNA2D1	252	0
1234	ENSDARG00000073792	0.078610707	16	1	4.039248981	-4.243972106	1.35E-307	37.4713243	man1b1a	120	4.51E-306
1235	ENSDARG00000073799	0.064756025	2	1	0.747346022	-1.239309086	3.19E-208	30.77113076	zgc:194210	303	8.42E-207
1236	ENSDARG00000073810	0.043451633	7	1	-1.386125646	-4.952220244	1.59E-96	20.8148941	thbs2b	66	2.82E-95
1237	ENSDARG00000073822	0.121670109	5	2	-2.013498746	6.509795385	0	57.80238274	IQSEC1	269	0
1238	ENSDARG00000073869	0.119654285	2	1	1.619505324	-2.644784613	0	56.72437108	pdzrn3b	1921	0
1239	ENSDARG00000073926	0.047216547	3	2	-0.647471986	6.521156507	1.81E-111	22.40372143	synrg	1544	3.47E-110
1240	ENSDARG00000073935	0.104214551	6	1	-3.854481898	-5.098884864	0	49.48691467	wnt6b	344	0
1241	ENSDARG00000073952	0.04898171	1	1	-2.410100661	-2.013797803	9.85E-120	23.23600088	slc4a7	2763	1.95E-118
1242	ENSDARG00000074034	0.046927635	8	2	-0.415161632	7.175073819	2.53E-110	22.28600205	si:dkey-91i10.2	515	4.79E-109
1243	ENSDARG00000074064	0.072551203	3	2	0.492545672	6.812282758	4.34E-262	34.56436872	rem2	130	1.30E-260
1244	ENSDARG00000074086	0.086501874	8	2	-0.516517721	6.958876329	0	41.1599367	tecpr1b	165	0
1245	ENSDARG00000074117	0.114755008	6	1	-4.058218203	-4.890819592	0	54.51652978	si:dkey-1h24.2	262	0
1246	ENSDARG00000074126	0.051852029	1	1	-1.831669055	-2.313891096	4.10E-134	24.61748109	ttc39a	659	8.56E-133
1247	ENSDARG00000074143	0.052468641	3	2	0.435607098	5.669643121	4.80E-137	24.88979271	myo10l3	1917	1.02E-135
1248	ENSDARG00000074149	0.045693021	1	1	-3.07120987	-2.272076173	5.36E-105	21.72983397	itpr1b	259	9.92E-104
1249	ENSDARG00000074169	0.059130832	8	2	-0.638974331	6.8951685	9.28E-174	28.07726229	gpam	478	2.21E-172
1250	ENSDARG00000074183	0.287411372	6	1	-4.056892119	-4.900437398	0	136.2406102	si:dkey-172j4.3	1172	0
1251	ENSDARG00000074201	0.098301129	11	1	-0.098030857	-4.385925813	0	46.60408522	flna	2634	0
1252	ENSDARG00000074233	0.066291256	4	1	1.571439542	-0.522898955	1.81E-217	31.45466107	pde4bb	803	4.90E-216
1253	ENSDARG00000074244	0.039368424	10	2	0.39216467	4.105661111	2.61E-78	18.69726177	arhgef10lb	648	4.16E-77
1254	ENSDARG00000074258	0.321220544	3	2	-0.065499149	6.455537992	0	152.3399917	gramd1bb	602	0
1255	ENSDARG00000074265	0.047317318	3	2	0.046821528	5.551818566	2.57E-113	22.59239285	dzip1l	95	4.96E-112
1256	ENSDARG00000074275	0.039815283	3	2	-1.337657652	6.046817021	5.31E-80	18.90379562	limch1a	826	8.61E-79
1257	ENSDARG00000074287	0.036090336	13	1	2.246763625	-3.762590213	4.48E-66	17.1294316	sptlc2b	2118	6.60E-65
1258	ENSDARG00000074310	0.049203724	7	1	-2.484383069	-5.73319797	5.06E-121	23.36322401	rbfox3b	576	1.01E-119
1259	ENSDARG00000074317	0.104199715	1	1	-2.744259558	-2.03250186	0	49.43062933	fam20ca	738	0
1260	ENSDARG00000074319	0.055467117	10	2	0.533801861	2.878004508	1.21E-153	26.37854612	sall1a	346	2.68E-152
1261	ENSDARG00000074335	0.099847421	2	1	0.696503349	-1.176443113	0	47.33154483	boc	3706	0
1262	ENSDARG00000074337	0.034027783	10	2	0.470651619	2.660072999	5.39E-59	16.1531737	cbfa2t2	1784	7.54E-58
1263	ENSDARG00000074376	0.049831609	12	2	-2.294199906	2.834132152	2.48E-124	23.68664189	mdga1	307	5.00E-123
1264	ENSDARG00000074390	0.077688895	1	1	-2.624464713	-2.861055179	1.39E-298	36.91373998	tmem176l.4	317	4.54E-297
1265	ENSDARG00000074396	0.042220616	8	2	-0.682506106	7.322467046	2.82E-90	20.11328184	fscn2b	156	4.86E-89
1266	ENSDARG00000074414	0.121325392	1	1	-1.049506746	-3.862768454	0	57.50690646	sema4ba	4454	0
1267	ENSDARG00000074415	0.046544821	17	3	-3.320857964	0.753189879	2.64E-109	22.18069183	zgc:171482	147	4.98E-108
1268	ENSDARG00000074443	0.086563086	2	1	0.63695807	-1.808857424	0	41.08137717	gas7a	673	0
1269	ENSDARG00000074469	0.088474739	14	1	5.036085882	-2.662360592	0	42.69054619	amigo3	41	0
1270	ENSDARG00000074480	0.034006853	7	1	-2.302310906	-5.953711791	2.17E-59	16.20914931	cnksr2a	249	3.04E-58
1271	ENSDARG00000074526	0.092081368	2	1	0.380586706	-1.265870554	0	43.65989855	zbtb16b	1842	0
1272	ENSDARG00000074560	0.220478434	3	2	0.095456668	5.619232373	0	104.595513	CHST8	516	0
1273	ENSDARG00000074583	0.04180037	12	2	-2.435570202	3.857148843	4.26E-88	19.86292233	grid1a	375	7.21E-87
1274	ENSDARG00000074590	0.032357256	5	2	-2.472016059	5.659306245	1.35E-53	15.36775405	wdpcp	893	1.80E-52
1275	ENSDARG00000074599	0.064509042	6	1	-3.360510312	-4.764521165	7.77E-206	30.59222563	frmd4ba	2757	2.04E-204
1276	ENSDARG00000074638	0.211340516	8	2	-0.117611132	7.397609906	0	100.7047596	loxhd1b	115	0
1277	ENSDARG00000074644	0.067416669	12	2	-2.134932004	3.289500909	5.95E-225	31.99725072	spock1	607	1.64E-223
1278	ENSDARG00000074646	0.034640358	17	3	-3.296980582	0.737238007	5.24E-62	16.57545467	adamts16	91	7.50E-61
1279	ENSDARG00000074677	0.095141865	2	1	1.530597605	-2.472852154	0	45.12908287	frem3	877	0
1280	ENSDARG00000074723	0.054123608	7	1	-2.341891013	-5.978736682	4.27E-146	25.71220032	myo10l1	348	9.27E-145
1281	ENSDARG00000074746	0.305725857	8	2	-1.577376805	7.549314695	0	145.1060097	kcnd1	426	0
1282	ENSDARG00000074749	0.085014091	1	1	-2.893991194	-1.584516806	0	40.38218011	abca12	358	0
1283	ENSDARG00000074781	0.073074425	11	1	-0.472094856	-4.145221038	9.32E-264	34.67518165	ptprt	852	2.80E-262
1284	ENSDARG00000074806	0.053759934	7	1	-2.414128028	-5.838814063	4.74E-144	25.52867317	afap1l2	456	1.03E-142
1285	ENSDARG00000074812	0.062738144	1	1	-2.465268574	-2.670792384	4.80E-195	29.76987923	fhdc1	847	1.22E-193
1286	ENSDARG00000074815	0.216689887	14	1	5.308289804	-3.005288167	0	102.9988126	mxra5a	221	0
1287	ENSDARG00000074852	0.08647975	5	2	-2.145459614	5.292616563	0	41.07385983	myo15b	330	0
1288	ENSDARG00000074865	0.065523551	17	3	-3.253569804	0.965259748	1.67E-213	31.16338876	frmpd3	228	4.45E-212
1289	ENSDARG00000074866	0.05562058	5	2	-1.748760901	5.455486016	1.59E-155	26.54193931	ptpn5	113	3.54E-154
1290	ENSDARG00000074905	0.033703131	3	2	0.059818901	5.668797689	3.19E-58	16.0431928	camk1da	212	4.42E-57
1291	ENSDARG00000074949	0.035710066	16	1	4.112086811	-3.999765916	1.74E-108	22.09557381	c1qtnf7	3	3.27E-107
1292	ENSDARG00000075015	0.036581403	1	1	-2.972107611	-1.534991069	5.23E-73	18.03445878	soul5	18	8.07E-72
1293	ENSDARG00000075034	0.033669001	10	2	0.511465617	3.091645198	8.16E-58	15.98472813	raver2	1287	1.12E-56
1294	ENSDARG00000075100	0.054996095	2	1	1.343235411	-2.397121591	2.41E-150	26.08928188	neo1b	1668	5.30E-149
1295	ENSDARG00000075126	0.085556202	5	2	-1.797750197	4.838023858	0	40.61732676	TMEM8B	415	0
1296	ENSDARG00000075133	0.034871188	11	1	-0.464117609	-3.74512486	4.91E-62	16.57935051	adgrb1a	642	7.03E-61
1297	ENSDARG00000075158	0.071543729	2	1	1.820315518	-2.184300942	1.13E-252	33.93190534	igdcc3	1449	3.30E-251
1298	ENSDARG00000075188	0.063784173	2	1	1.009128549	-0.514570011	1.88E-201	30.2608749	adamts10	1009	4.83E-200
1299	ENSDARG00000075264	0.113599989	4	1	2.680037774	-0.266068442	0	54.56022576	si:dkeyp-74a11.1	57	0
1300	ENSDARG00000075277	0.073122635	4	1	2.553349294	-0.248371823	2.76E-264	34.71020963	si:dkeyp-14d3.1	511	8.34E-263
1301	ENSDARG00000075292	0.223889461	5	2	-1.553083859	5.599572854	0	106.2109696	myo15aa	500	0
1302	ENSDARG00000075307	0.046258841	6	1	-3.94214078	-4.681554837	1.47E-107	21.99900039	kcnq2a	265	2.75E-106
1303	ENSDARG00000075334	0.094945872	4	1	1.631564655	-0.408690168	0	45.01521684	arhgap32a	2101	0
1304	ENSDARG00000075362	0.163849902	10	2	0.456195332	4.299698548	0	77.68831682	whrna	1059	0
1305	ENSDARG00000075393	0.053839337	1	1	-2.781894169	-3.39286737	6.08E-145	25.60884669	spock2	210	1.32E-143
1306	ENSDARG00000075532	0.31560564	9	1	2.668078222	-2.738081736	0	149.5675806	slc4a11	1961	0
1307	ENSDARG00000075542	0.059325148	2	1	1.397835531	-2.227678461	1.89E-174	28.13390193	zfhx4	3845	4.50E-173
1308	ENSDARG00000075555	0.056917817	2	1	1.710807957	-1.828694208	7.17E-161	27.00112122	adamts17	1549	1.64E-159
1309	ENSDARG00000075560	0.034709886	2	1	0.433270432	-0.676627008	2.93E-61	16.47169747	kmt2cb	5297	4.16E-60
1310	ENSDARG00000075565	0.041601481	11	1	-0.096518837	-4.523602767	9.06E-88	19.82496744	lzts1	255	1.53E-86
1311	ENSDARG00000075580	0.03210004	7	1	-1.901535473	-5.553755088	8.87E-53	15.24511696	lrch2	943	1.18E-51
1312	ENSDARG00000075593	0.079702467	6	1	-2.204496584	-4.807212396	0	37.78872096	trim71	3255	0
1313	ENSDARG00000075608	0.059485859	16	1	3.948817529	-4.036659999	1.91E-176	28.2964898	mical2a	201	4.61E-175
1314	ENSDARG00000075625	0.032650046	4	1	2.074754157	0.753352718	1.72E-54	15.50066915	lrig1	1701	2.31E-53
1315	ENSDARG00000075685	0.109177845	8	2	-1.083556734	7.572203832	0	51.87388648	tlr7	300	0
1316	ENSDARG00000075707	0.07356028	14	1	4.684919156	-2.621940298	3.38E-267	34.90269212	nid2a	977	1.03E-265
1317	ENSDARG00000075733	0.044039197	11	1	-0.083931259	-4.377794309	2.47E-97	20.90375688	zyx	1214	4.41E-96
1318	ENSDARG00000075752	0.051960471	1	1	-2.885507308	-3.294705911	5.98E-135	24.69546431	myo18aa	307	1.26E-133
1319	ENSDARG00000075793	0.139603621	6	1	-4.032559596	-4.889890952	0	66.17924102	prex1	1754	0
1320	ENSDARG00000075806	0.320334156	14	1	4.815620698	-3.147364659	0	151.8341559	kirrel3a	1500	0
1321	ENSDARG00000075825	0.033508012	3	2	-0.258724235	6.034882264	1.37E-57	15.95229669	dlec1	214	1.89E-56
1322	ENSDARG00000075853	0.078638138	7	1	-2.30160471	-6.146437926	1.71E-305	37.34198803	sh3kbp1	382	5.66E-304
1323	ENSDARG00000075858	0.05060366	8	2	-1.51375731	6.730360704	9.39E-129	24.11182162	fam155a	148	1.93E-127
1324	ENSDARG00000075859	0.043590043	8	2	-1.247607551	7.076929288	1.76E-95	20.69919493	mcf2la	601	3.11E-94
1325	ENSDARG00000075864	0.191851984	1	1	-1.928347073	-3.338031573	0	90.91633792	igsf9a	4580	0
1326	ENSDARG00000075866	0.033855529	5	2	-1.923472844	6.258657174	1.36E-59	16.2380532	cdcp2	62	1.90E-58
1327	ENSDARG00000075870	0.098564401	8	2	-0.542636059	7.145595746	0	46.90499622	triobpa	157	0
1328	ENSDARG00000075917	0.052531205	3	2	0.516130157	5.68800755	2.53E-138	25.00748347	cacna1db	180	5.38E-137
1329	ENSDARG00000075942	0.082529221	4	1	2.342621841	0.361425357	0	39.13213234	FRMD5	2150	0
1330	ENSDARG00000075962	0.047506188	4	1	2.528494396	-0.245761974	7.26E-114	22.64825357	vav3b	142	1.40E-112
1331	ENSDARG00000075964	0.045159131	2	1	1.113019683	-1.070885418	3.68E-102	21.42781957	plekhg4	1744	6.74E-101
1332	ENSDARG00000076030	0.263699734	5	2	-2.658018075	5.609288411	0	125.395635	cacnb3b	174	0
1333	ENSDARG00000076040	0.080293722	3	2	-0.228650234	5.71193953	0	38.12339146	arl15a	415	0
1334	ENSDARG00000076060	0.060381683	14	1	4.434302129	-2.500737114	1.33E-180	28.63238471	diaph2	7253	3.25E-179
1335	ENSDARG00000076092	0.040690007	14	1	5.074933805	-3.197694821	1.67E-85	19.56090034	slc31a2	55	2.78E-84
1336	ENSDARG00000076094	0.242500119	10	2	0.208526228	4.634116845	0	115.1560861	klhl30	284	0
1337	ENSDARG00000076119	0.131958625	9	1	2.28464035	-1.982249541	0	62.57056719	emid1	1101	0
1338	ENSDARG00000076120	0.256978121	6	1	-3.241330348	-5.456146045	0	121.7618798	foxp4	10633	0
1339	ENSDARG00000076140	0.059781427	1	1	-1.147951446	-3.827508969	1.72E-178	28.46226345	clcf1	277	4.17E-177
1340	ENSDARG00000076171	0.03925762	6	1	-3.227828942	-5.105036063	9.78E-78	18.62658279	znf827	4352	1.56E-76
1341	ENSDARG00000076227	0.162593191	16	1	3.859695472	-3.963837905	0	77.06577486	ror2	2280	0
1342	ENSDARG00000076265	0.046463991	10	2	0.494561471	3.737364011	4.21E-109	22.15960879	ano8a	115	7.94E-108
1343	ENSDARG00000076280	0.114246176	14	1	4.51840476	-2.612180753	0	54.17886418	ppp1r1b	1016	0
1344	ENSDARG00000076292	0.047822304	9	1	3.001075544	-1.335407419	2.83E-114	22.68966152	tns2a	1605	5.48E-113
1345	ENSDARG00000076297	0.039151213	5	2	-1.543313466	5.398966031	2.12E-77	18.58512039	nfatc3a	1109	3.37E-76
1346	ENSDARG00000076302	0.056692785	2	1	0.592749395	-0.361148162	1.09E-159	26.90038633	dtx4a	1034	2.47E-158
1347	ENSDARG00000076321	0.16023253	7	1	-2.275951109	-5.775842948	0	75.9768392	col28a2a	1276	0
1348	ENSDARG00000076332	0.050003888	9	1	3.022971191	-3.271953864	1.16E-127	24.00754472	si:ch211-159i8.4	62	2.36E-126
1349	ENSDARG00000076404	0.160141743	5	2	-1.844454728	5.024346547	0	75.96995848	mctp1a	586	0
1350	ENSDARG00000076414	0.162383472	10	2	-0.019214712	4.467341619	0	76.97173398	espn	1924	0
1351	ENSDARG00000076420	0.105220172	1	1	-2.401789151	-2.244338913	0	49.92946608	dkk2	541	0
1352	ENSDARG00000076434	0.033677909	3	2	0.251246833	5.256663518	2.45E-58	16.05955218	ARHGAP22	143	3.40E-57
1353	ENSDARG00000076480	0.078964797	1	1	-2.342029296	-3.512835784	3.03E-307	37.44975126	mcf2lb	1287	1.01E-305
1354	ENSDARG00000076510	0.033337079	4	1	1.881631412	-0.715569897	6.36E-57	15.85626891	fgf22	288	8.68E-56
1355	ENSDARG00000076532	0.063820319	15	1	-0.941747032	-0.265216572	1.60E-201	30.26623018	si:ch211-222l21.1	2594	4.11E-200
1356	ENSDARG00000076564	0.04449031	11	1	0.016741969	-4.48090486	3.41E-99	21.10730284	hspg2	2965	6.16E-98
1357	ENSDARG00000076571	0.066966217	2	1	0.695944049	-1.613727791	2.28E-223	31.88319661	sp5a	166	6.25E-222
1358	ENSDARG00000076594	0.147191412	7	1	-1.8959684	-5.193461223	0	69.79826351	pcdh12	897	0
1359	ENSDARG00000076595	0.061351664	6	1	-3.496084176	-5.103306098	5.09E-187	29.14320706	sema4ga	370	1.27E-185
1360	ENSDARG00000076639	0.125408102	16	1	3.986450471	-4.154370351	0	59.55939371	esamb	320	0
1361	ENSDARG00000076657	0.093069789	2	1	0.733432867	-2.111605329	0	44.12046062	plagl2	3932	0
1362	ENSDARG00000076667	0.062798476	14	1	4.80604247	-2.395559831	1.97E-195	29.79977631	ccng1	822	5.01E-194
1363	ENSDARG00000076673	0.032803717	4	1	1.517547049	-0.489465905	5.46E-55	15.57404869	dspb	1513	7.36E-54
1364	ENSDARG00000076687	0.035534	5	2	-1.993596278	6.210115628	1.16E-64	16.93904792	si:rp71-84d9.1	158	1.70E-63
1365	ENSDARG00000076729	0.107729618	7	1	-2.446251355	-6.047168536	0	51.06501349	myo9aa	3935	0
1366	ENSDARG00000076748	0.105436561	9	1	3.173897066	-2.135844393	0	50.01757941	ntn2	664	0
1367	ENSDARG00000076799	0.071577418	2	1	0.321550235	-1.28590904	8.77E-253	33.93930893	rnd3a	3418	2.57E-251
1368	ENSDARG00000076801	0.032422744	6	1	-3.964222155	-4.685224099	7.97E-54	15.40171107	arap3	680	1.06E-52
1369	ENSDARG00000076856	0.135215029	7	1	-1.976705037	-5.394330306	0	64.11154489	frem2a	1178	0
1370	ENSDARG00000076867	0.033786306	6	1	-2.870301686	-5.02080421	3.08E-58	16.04537606	mrtfbb	840	4.27E-57
1371	ENSDARG00000076896	0.038840367	3	2	0.677921541	6.937967019	1.61E-78	18.72302225	si:dkey-188g12.1	47	2.57E-77
1372	ENSDARG00000076919	0.045676532	4	1	2.351192274	0.5987397	1.94E-104	21.67072212	igdcc4	2213	3.58E-103
1373	ENSDARG00000076933	0.149675934	4	1	1.210220375	-0.531549497	0	70.96729493	aldh1a3	1071	0
1374	ENSDARG00000076959	0.085806117	3	2	-1.221437417	6.058373647	0	40.90038514	si:ch211-38m6.6	111	0
1375	ENSDARG00000076974	0.162706092	3	2	0.01875899	4.973486619	0	77.19571172	pdzd7a	497	0
1376	ENSDARG00000077002	0.181225806	1	1	-2.487046919	-3.755068583	0	85.87880164	igsf3	6295	0
1377	ENSDARG00000077039	0.068181411	16	1	3.956000127	-4.128934665	1.26E-229	32.33165236	esama	2607	3.48E-228
1378	ENSDARG00000077052	0.0359512	16	1	3.85669569	-3.637847228	1.41E-65	17.06251703	tnrc18	2379	2.07E-64
1379	ENSDARG00000077072	0.093455562	4	1	2.338873901	-1.142584441	0	44.31042327	si:ch73-280o22.2	2032	0
1380	ENSDARG00000077073	0.087648088	7	1	-2.097806893	-6.033304019	0	41.56601473	tanc1a	1298	0
1381	ENSDARG00000077096	0.158766545	1	1	-2.880616866	-2.550495787	0	75.3131044	fndc7a	570	0
1382	ENSDARG00000077169	0.098921704	1	1	-2.727268897	-2.212363047	0	47.09770161	si:ch211-153b23.4	162	0
1383	ENSDARG00000077193	0.036492097	5	2	-1.514147006	5.667744832	4.99E-68	17.38906499	nags	156	7.47E-67
1384	ENSDARG00000077217	0.047813743	1	1	-2.243262015	-3.942685885	1.58E-114	22.71536124	zgc:162184	376	3.06E-113
1385	ENSDARG00000077228	0.111227022	5	2	-1.84653493	4.51781817	0	52.78805486	ntrk3a	530	0
1386	ENSDARG00000077329	0.034928443	2	1	1.870369591	-2.295319004	4.11E-62	16.59013861	nlgn2a	672	5.89E-61
1387	ENSDARG00000077382	0.209439004	3	2	0.452484332	6.322006421	0	99.39412276	hcn5	387	0
1388	ENSDARG00000077465	0.232516795	4	1	2.153450765	-0.166165991	0	110.1872019	sorcs2	3101	0
1389	ENSDARG00000077467	0.061931864	2	1	1.198174574	-1.417236252	4.93E-190	29.38008871	sox10	1131	1.24E-188
1390	ENSDARG00000077474	0.034506623	7	1	-2.172369919	-5.334311767	1.30E-60	16.38127389	pla2r1	1507	1.84E-59
1391	ENSDARG00000077492	0.393839012	5	2	-2.691203318	5.626770692	0	186.7250211	atp8a2	876	0
1392	ENSDARG00000077499	0.033447422	6	1	-2.722082816	-4.88789825	4.23E-57	15.88192164	plekho1b	1091	5.77E-56
1393	ENSDARG00000077588	0.084983883	2	1	1.461490669	-2.071003003	0	40.29530965	pdgfc	2190	0
1394	ENSDARG00000077596	0.04086422	5	2	-1.694663487	4.522980886	6.41E-86	19.60951605	phf24	61	1.07E-84
1395	ENSDARG00000077691	0.049577521	2	1	1.489036478	-1.867908044	6.94E-123	23.54573539	slc13a5a	451	1.40E-121
1396	ENSDARG00000077694	0.040474876	1	1	-2.063847504	-2.073740287	1.57E-82	19.20846288	dtnba	1572	2.58E-81
1397	ENSDARG00000077710	0.064266677	12	2	-2.227022372	2.896403508	1.18E-204	30.503372	nlgn1	588	3.08E-203
1398	ENSDARG00000077722	0.048632659	9	1	3.011238374	-1.575797481	4.36E-118	23.07258948	ppp2r3a	1843	8.59E-117
1399	ENSDARG00000077726	0.040992498	13	1	2.46335391	-3.917991443	1.42E-84	19.45126354	nocta	2237	2.36E-83
1400	ENSDARG00000077791	0.094495922	12	2	-1.651938282	2.533721643	0	44.81454321	brsk2b	1130	0
1401	ENSDARG00000077818	0.058295252	11	1	-0.31082233	-4.098315997	7.07E-169	27.67453867	nrg2a	889	1.66E-167
1402	ENSDARG00000077847	0.05486095	4	1	1.899362244	0.87526186	4.49E-150	26.06545808	olfm2a	397	9.86E-149
1403	ENSDARG00000077864	0.043904608	16	1	4.097898044	-4.029636426	2.42E-98	21.01442323	rasgrp3	73	4.35E-97
1404	ENSDARG00000077906	0.057897339	2	1	0.37316566	0.174048143	2.48E-166	27.46225865	rnf165a	2027	5.78E-165
1405	ENSDARG00000077915	0.18803971	14	1	4.608202733	-2.736554546	0	89.32772814	lmx1al	249	0
1406	ENSDARG00000077920	0.032248087	12	2	-2.279534064	2.859679656	2.45E-53	15.32898827	csmd3a	408	3.26E-52
1407	ENSDARG00000077962	0.032200558	8	2	-1.433760725	6.381125646	1.74E-54	15.49991836	gltpb	47	2.33E-53
1408	ENSDARG00000077994	0.057256687	5	2	-1.712225876	5.705820279	6.39E-163	27.17513504	b4galt2	700	1.47E-161
1409	ENSDARG00000077996	0.163632036	8	2	-1.577015005	7.663257794	0	78.0127355	cdh24b	114	0
1410	ENSDARG00000078011	0.072724098	7	1	-1.061035595	-4.698206468	4.46E-261	34.49694486	NAV1	1233	1.33E-259
1411	ENSDARG00000078060	0.14977632	4	1	2.277244129	-0.874822395	0	71.0259284	syt7b	931	0
1412	ENSDARG00000078068	0.049222316	1	1	-2.852305136	-1.612473411	2.05E-122	23.49986681	abcg4b	100	4.10E-121
1413	ENSDARG00000078088	0.032854211	12	2	-2.287806473	3.112631517	1.90E-55	15.64146922	si:ch211-186j3.6	220	2.57E-54
1414	ENSDARG00000078155	0.086498565	10	2	0.550225385	3.178305345	0	41.09545014	inavaa	299	0
1415	ENSDARG00000078163	0.208751767	6	1	-3.982187949	-4.718080802	0	98.96913244	hpse2	1103	0
1416	ENSDARG00000078179	0.131378356	9	1	3.202540674	-3.331800027	0	62.26402551	fndc3ba	8331	0
1417	ENSDARG00000078191	0.063397803	1	1	-1.69711443	-3.262880368	5.26E-199	30.07427457	zbtb46	1389	1.35E-197
1418	ENSDARG00000078211	0.290500128	10	2	0.19940852	4.636188226	0	137.8135904	espnla	475	0
1419	ENSDARG00000078227	0.037002524	4	1	2.500070133	0.349468665	1.72E-69	17.5809409	cspg4	494	2.60E-68
1420	ENSDARG00000078270	0.093839104	6	1	-3.408756934	-4.813460154	0	44.49304859	CU467961.1	1858	0
1421	ENSDARG00000078309	0.164660152	1	1	-2.282167397	-3.925187869	0	78.07265906	fam83b	1069	0
1422	ENSDARG00000078322	0.072644319	6	1	-3.128558837	-4.707627339	2.48E-260	34.44715779	col12a1a	2652	7.42E-259
1423	ENSDARG00000078324	0.091625744	4	1	1.289537229	-0.379158182	0	43.46846561	si:ch211-263k4.2	803	0
1424	ENSDARG00000078335	0.058777167	2	1	0.672460445	-1.685328407	2.10E-171	27.88369878	amot	1353	4.96E-170
1425	ENSDARG00000078362	0.070198315	6	1	-4.090887747	-5.110418601	3.11E-244	33.35468655	zmp:0000000846	296	8.90E-243
1426	ENSDARG00000078404	0.041902234	10	2	0.681507357	4.219305711	1.54E-88	19.91407326	cdh26.1	447	2.61E-87
1427	ENSDARG00000078416	0.042875607	12	2	-1.589392148	2.422152	1.10E-92	20.38669719	zeb2b	293	1.91E-91
1428	ENSDARG00000078430	0.034636887	11	1	-0.392006956	-3.880007548	3.90E-61	16.45436713	tiam1a	932	5.53E-60
1429	ENSDARG00000078459	0.03954268	2	1	1.733264841	-2.113101048	7.93E-79	18.76057581	cux1a	7640	1.27E-77
1430	ENSDARG00000078474	0.216047818	8	2	-0.442905269	7.270424085	0	102.605866	myo15ab	270	0
1431	ENSDARG00000078522	0.424622644	9	1	3.006083764	-1.488089068	0	201.1984226	si:ch211-80h18.1	3164	0
1432	ENSDARG00000078523	0.052062988	6	1	-3.071757756	-5.178298755	5.89E-135	24.69609688	ddr1	2312	1.24E-133
1433	ENSDARG00000078557	0.033786064	12	2	-1.407980166	2.211343722	1.70E-58	16.08226014	si:ch211-57n23.4	226	2.36E-57
1434	ENSDARG00000078582	0.127808876	8	2	-1.101897202	6.451093392	0	60.63155649	myo16	628	0
1435	ENSDARG00000078599	0.038179172	4	1	2.119698324	-0.825371308	4.95E-74	18.16423219	micu3a	227	7.73E-73
1436	ENSDARG00000078603	0.071207673	3	2	-0.045436553	6.256680684	3.18E-253	33.96911749	myo1hb	101	9.35E-252
1437	ENSDARG00000078707	0.038030214	5	2	-2.02632185	5.500669675	4.67E-74	18.16748744	sema7a	96	7.29E-73
1438	ENSDARG00000078717	0.152973771	4	1	2.249142923	-0.104630752	0	72.51754843	itga8	1519	0
1439	ENSDARG00000078754	0.038911988	1	1	-2.961521111	-3.290061278	1.05E-143	25.49756147	gra	3	2.27E-142
1440	ENSDARG00000078778	0.044413638	1	1	-1.583022199	-2.775618715	4.52E-99	21.09391179	lrch1	659	8.17E-98
1441	ENSDARG00000078800	0.23889215	2	1	0.729760684	-1.470061464	0	113.288594	slc26a10	666	0
1442	ENSDARG00000078839	0.079404002	4	1	2.432315149	-0.097575827	0	37.72279421	si:dkey-28o19.1	320	0
1443	ENSDARG00000078866	0.104009098	2	1	0.945660688	-2.410272403	0	49.31025843	sdk1a	2230	0
1444	ENSDARG00000078898	0.223124302	8	2	-0.983930908	6.81728621	0	105.8408253	pcdh7a	590	0
1445	ENSDARG00000079011	0.093815646	7	1	-2.232046805	-6.076874537	0	44.55482952	col17a1b	308	0
1446	ENSDARG00000079027	0.222661801	16	1	4.066583194	-3.910780711	0	105.5113906	chsy1	5874	0
1447	ENSDARG00000079076	0.094750347	5	2	-2.587724648	5.408436971	0	45.23392479	hgfb	93	0
1448	ENSDARG00000079097	0.146197252	10	2	0.507556029	3.41075726	0	69.29134614	tanc2a	3311	0
1449	ENSDARG00000079119	0.174648862	1	1	-3.016279183	-2.346210046	0	83.00526738	si:ch211-229d2.5	204	0
1450	ENSDARG00000079161	0.069355936	10	2	0.519273587	4.228415685	3.85E-238	32.93182347	bsnb	424	1.08E-236
1451	ENSDARG00000079199	0.076595899	17	3	-3.308417521	0.773046451	1.58E-292	36.53435346	megf6a	111	5.07E-291
1452	ENSDARG00000079201	0.229003485	1	1	-2.64074441	-3.863365216	0	108.5194765	tshz2	3663	0
1453	ENSDARG00000079204	0.056053635	5	2	-1.618464671	4.528433042	1.16E-156	26.64027191	adam11	296	2.60E-155
1454	ENSDARG00000079231	0.059266783	3	2	-1.081809841	5.924868779	4.25E-176	28.26821426	slc7a14b	104	1.02E-174
1455	ENSDARG00000079251	0.052039692	4	1	1.872893609	-1.355784578	1.79E-135	24.74420145	nlgn2b	256	3.77E-134
1456	ENSDARG00000079253	0.084831266	6	1	-4.031426631	-4.759985013	0	40.21874522	plch1	3174	0
1457	ENSDARG00000079281	0.10347728	3	2	0.609689273	6.438922601	0	49.15296919	si:dkeyp-75h12.2	295	0
1458	ENSDARG00000079291	0.084400736	1	1	-2.992045365	-1.517884416	0	40.18952224	rapgef3	149	0
1459	ENSDARG00000079307	0.098868349	1	1	-3.00147172	-2.373226805	0	46.9509314	si:dkey-205h13.1	330	0
1460	ENSDARG00000079327	0.071384591	16	1	3.838564433	-3.969569726	1.83E-251	33.84973281	hmcn2	2759	5.32E-250
1461	ENSDARG00000079336	0.050895151	3	2	0.461432107	6.148467736	1.53E-129	24.18687379	strc1	339	3.16E-128
1462	ENSDARG00000079355	0.261099561	7	1	-1.380285583	-4.677856488	0	123.7270074	flrt2	4063	0
1463	ENSDARG00000079372	0.077811208	1	1	-2.127302847	-3.871310515	1.88E-298	36.90565337	si:ch211-264f5.6	1299	6.11E-297
1464	ENSDARG00000079377	0.05293356	1	1	-2.116332255	-3.033248467	1.21E-139	25.12852943	arhgef38	603	2.59E-138
1465	ENSDARG00000079388	0.119254355	2	1	1.238152303	-1.89528547	0	56.52066915	agrn	10838	0
1466	ENSDARG00000079453	0.052521265	3	2	0.577348151	7.073682981	8.94E-143	25.41353643	atp8b4	32	1.92E-141
1467	ENSDARG00000079455	0.057594717	4	1	2.510586776	-0.259620232	3.81E-165	27.3627046	nlgn4xa	342	8.85E-164
1468	ENSDARG00000079470	0.071069731	6	1	-4.014767371	-4.756030126	2.82E-249	33.70076701	cdk17	2663	8.13E-248
1469	ENSDARG00000079555	0.033497591	2	1	1.274531998	-2.398670597	2.83E-57	15.9071295	ccdc85cb	989	3.87E-56
1470	ENSDARG00000079570	0.158612632	4	1	2.899208583	-0.610107614	0	75.22981176	rspo2	703	0
1471	ENSDARG00000079610	0.060178403	3	2	-0.284646295	5.478919225	8.20E-180	28.56880889	akap9	583	2.00E-178
1472	ENSDARG00000079611	0.088486372	1	1	-2.758897505	-1.965948386	0	41.94695597	sema4c	5728	0
1473	ENSDARG00000079613	0.032816446	8	2	-1.276642643	7.559321599	8.75E-57	15.83622792	sall3a	39	1.19E-55
1474	ENSDARG00000079679	0.037561805	15	1	-0.498577498	0.810213523	2.18E-71	17.8270299	cep112	1864	3.33E-70
1475	ENSDARG00000079742	0.142840259	4	1	1.715956487	-1.286137802	0	67.70248022	mcf2l2	2841	0
1476	ENSDARG00000079745	0.039242145	11	1	-0.069544665	-4.339261575	9.49E-78	18.62818791	si:ch211-166a6.5	1226	1.51E-76
1477	ENSDARG00000079779	0.044489774	3	2	-0.132586293	5.333487706	4.47E-100	21.20315159	radil	139	8.10E-99
1478	ENSDARG00000079781	0.031360123	8	2	-0.685090683	7.509681897	2.17E-54	15.48546349	slitrk4	17	2.92E-53
1479	ENSDARG00000079839	0.032935999	1	1	-1.661054216	-2.316911263	2.11E-55	15.63465624	arrdc1b	2060	2.85E-54
1480	ENSDARG00000079840	0.358104226	5	2	-1.886054717	5.455569463	0	169.6934976	kcnma1a	2633	0
1481	ENSDARG00000079850	0.053390522	3	2	-0.506034754	5.642919736	6.03E-142	25.33844114	dchs1b	843	1.29E-140
1482	ENSDARG00000079869	0.094326366	5	2	-1.941582404	6.062206464	0	44.89987826	si:ch211-218o21.4	160	0
1483	ENSDARG00000079891	0.104508083	5	2	-2.286417685	5.422975736	0	49.67134498	dnajc6	235	0
1484	ENSDARG00000079912	0.241635325	3	2	0.227619134	4.997180181	0	114.6437342	rapgefl1	486	0
1485	ENSDARG00000079922	0.056956752	13	1	2.031940259	-3.623652739	2.54E-161	27.03942998	klf4	701	5.83E-160
1486	ENSDARG00000080009	0.120140239	2	1	0.376437538	-1.006336553	0	56.94178188	bahcc1b	5967	0
1487	ENSDARG00000080337	0.085820829	15	1	-1.271322094	-0.097376628	0	40.68859132	NC_002333.4	17750	0
1488	ENSDARG00000081299	0.048242679	13	1	1.775936641	-3.836663289	1.30E-116	22.92525612	BX936308.1	340	2.54E-115
1489	ENSDARG00000082753	0.04756277	15	1	-1.266215525	-0.093221171	5.32E-113	22.56029402	NC_002333.17	6299	1.02E-111
1490	ENSDARG00000086034	0.070208814	11	1	-0.390689157	-3.098351998	2.61E-243	33.29098502	nectin1b	3924	7.43E-242
1491	ENSDARG00000086091	0.04574676	1	1	-2.634147606	-2.355842514	3.78E-105	21.74584934	kcnn4	300	7.00E-104
1492	ENSDARG00000086158	0.055269871	2	1	1.042854525	-0.810927203	3.36E-152	26.25230106	ccbe1	409	7.43E-151
1493	ENSDARG00000086173	0.048830891	9	1	2.606045522	-2.943400664	3.82E-119	23.17777561	relb	828	7.53E-118
1494	ENSDARG00000086215	0.170690555	3	2	0.076002501	5.521906095	0	81.05207872	gpr156	312	0
1495	ENSDARG00000086222	0.051043995	8	2	-1.251105748	7.103730397	6.16E-130	24.2243711	nat16	893	1.27E-128
1496	ENSDARG00000086272	0.330831787	1	1	-2.957722388	-1.559675558	0	157.5125988	si:dkey-4p15.5	124	0
1497	ENSDARG00000086288	0.051081759	10	2	0.519293227	4.006636815	1.68E-130	24.27793731	scg3	305	3.47E-129
1498	ENSDARG00000086327	0.397140016	10	2	0.502909072	3.264521318	0	188.2197709	srrm4	1876	0
1499	ENSDARG00000086471	0.092211019	5	2	-1.740707956	6.374641614	0	43.72872956	pkig	1322	0
1500	ENSDARG00000086489	0.252332717	4	1	1.544271149	-0.231546266	0	119.5724357	CU179643.1	3670	0
1501	ENSDARG00000086679	0.038987562	5	2	-2.019784413	4.880281644	6.49E-79	18.77125381	si:ch211-197l9.5	51	1.04E-77
1502	ENSDARG00000086762	0.075025138	1	1	-2.75940939	-2.947496934	1.87E-278	35.63705765	gsdmea	314	5.80E-277
1503	ENSDARG00000086853	0.037501296	7	1	-1.968309603	-5.399724765	3.40E-71	17.80215241	dpyda.3	1202	5.18E-70
1504	ENSDARG00000086950	0.033521468	4	1	1.282874979	-0.329992576	2.52E-57	15.91436957	si:ch211-269k10.2	1400	3.45E-56
1505	ENSDARG00000087144	0.030508075	8	2	-1.086640797	7.619911389	4.57E-58	16.02086917	fam183a	8	6.31E-57
1506	ENSDARG00000087190	0.033854709	1	1	-2.700509749	-2.901659055	7.13E-59	16.13591761	si:ch73-105b23.6	146	9.95E-58
1507	ENSDARG00000087210	0.036149687	3	2	0.251458833	5.997154908	8.52E-68	17.35841557	vwa3a	54	1.27E-66
1508	ENSDARG00000087224	0.233928879	1	1	-2.956561289	-1.54782371	0	111.1301923	si:ch73-380n15.2	241	0
1509	ENSDARG00000087247	0.192710645	8	2	-1.018570505	6.799566941	0	91.34395859	kcnab2a	1775	0
1510	ENSDARG00000087251	0.039214273	10	2	0.469294347	4.353010373	4.66E-80	18.91063179	si:ch73-50f9.4	46	7.57E-79
1511	ENSDARG00000087352	0.145912312	3	2	0.499894165	5.741830068	0	69.18781245	dnah2	1069	0
1512	ENSDARG00000087373	0.369112258	3	2	-0.553372584	6.079519467	0	174.9745202	dnah5	1040	0
1513	ENSDARG00000087556	0.166926304	3	2	-0.484944604	6.004893022	0	79.19891184	pacrg	519	0
1514	ENSDARG00000087688	0.127601375	4	1	2.088840403	-0.673192559	0	60.48887489	klhl29	1932	0
1515	ENSDARG00000087717	0.057746126	16	1	4.116500654	-4.04680614	2.73E-166	27.4587232	tmprss5	240	6.36E-165
1516	ENSDARG00000087822	0.050632091	11	1	-0.291359327	-4.473032279	9.14E-128	24.01743339	agap3	2859	1.86E-126
1517	ENSDARG00000087832	0.05512213	9	1	2.609478988	-2.853508992	6.16E-152	26.22929079	bcl3	186	1.36E-150
1518	ENSDARG00000087956	0.050576538	6	1	-3.183647357	-4.774563355	7.48E-128	24.02576076	she	400	1.53E-126
1519	ENSDARG00000088073	0.033349844	9	1	3.174845495	-1.767929716	8.63E-57	15.83707097	fam110b	901	1.18E-55
1520	ENSDARG00000088087	0.041850338	1	1	-0.967084728	-3.883963628	4.97E-88	19.85519481	kdm6ba	4272	8.40E-87
1521	ENSDARG00000088137	0.042943838	1	1	-2.954313241	-2.411415024	1.68E-93	20.47829805	adgrg2a	118	2.95E-92
1522	ENSDARG00000088140	0.038850376	3	2	-0.310171209	6.723562913	2.03E-76	18.46344651	hsd17b7	384	3.21E-75
1523	ENSDARG00000088157	0.123582033	6	1	-4.051769934	-5.177196784	0	58.6163452	smoc2	740	0
1524	ENSDARG00000088187	0.042190522	1	1	-2.370619021	-3.90914516	1.58E-89	20.02780146	CR381544.1	859	2.69E-88
1525	ENSDARG00000088255	0.058883395	4	1	2.470503129	0.727048712	5.52E-173	28.01374868	smoc1	199	1.31E-171
1526	ENSDARG00000088293	0.03282014	11	1	0.105532177	-5.053268714	3.76E-55	15.59794612	doc2b	490	5.07E-54
1527	ENSDARG00000088315	0.16918563	1	1	-2.650049172	-3.159005685	0	80.27250492	si:ch211-103f14.3	455	0
1528	ENSDARG00000088342	0.073316744	8	2	-0.950736366	7.516650395	1.31E-265	34.79783162	tmem145	561	3.98E-264
1529	ENSDARG00000088423	0.077529289	10	2	0.361602046	4.429406362	2.34E-297	36.83719619	si:ch211-66k16.28	272	7.63E-296
1530	ENSDARG00000088630	0.19302726	1	1	-2.782651864	-1.890618606	0	91.48857381	arhgef10la	2218	0
1531	ENSDARG00000088656	0.091692964	8	2	-0.444378398	7.395534711	0	43.87572168	si:ch211-212k18.6	64	0
1532	ENSDARG00000088708	0.042842664	6	1	-3.901547633	-4.539953275	2.29E-92	20.35066504	ngfra	472	3.98E-91
1533	ENSDARG00000088750	0.298438029	4	1	2.600130119	0.150652604	0	141.5273191	otogl	643	0
1534	ENSDARG00000088753	0.099049779	3	2	0.458267577	5.76507874	0	47.06175333	cfap299	261	0
1535	ENSDARG00000088816	0.085827774	6	1	-2.922892056	-5.569978518	0	40.72966969	trabd2b	576	0
1536	ENSDARG00000088842	0.31996548	8	2	-0.553058646	7.386839109	0	151.730032	KCNB2	743	0
1537	ENSDARG00000088898	0.076405078	5	2	-1.799787245	4.702115255	4.99E-289	36.31331154	caln1	251	1.59E-287
1538	ENSDARG00000088967	0.04234449	14	1	4.878044404	-2.414755864	2.57E-90	20.11796223	wnk4b	412	4.42E-89
1539	ENSDARG00000089066	0.162106549	9	1	3.081619777	-1.462477846	0	76.83413141	nhsl2	2594	0
1540	ENSDARG00000089076	0.038046158	3	2	0.277833462	5.395040708	3.33E-73	18.05929671	gphna	1300	5.15E-72
1541	ENSDARG00000089109	0.068166438	5	2	-2.944585286	5.755407052	5.01E-237	32.8538987	bcl2b	40	1.41E-235
1542	ENSDARG00000089149	0.036606558	8	2	-1.208715759	6.595954614	2.96E-69	17.55018889	gpx2	62	4.47E-68
1543	ENSDARG00000089190	0.062162191	2	1	1.046823003	-0.701212658	2.76E-191	29.47789859	tanc1b	3849	6.96E-190
1544	ENSDARG00000089200	0.231705855	5	2	-2.06669756	6.068951802	0	109.9405866	si:dkey-103g5.4	445	0
1545	ENSDARG00000089223	0.071427707	4	1	1.43503622	-0.4344189	5.61E-252	33.88461447	ngfrb	972	1.63E-250
1546	ENSDARG00000089271	0.047076165	8	2	-1.44227644	7.016550737	1.88E-111	22.40204835	nexmifa	211	3.60E-110
1547	ENSDARG00000089292	0.138771959	12	2	-2.224195681	3.435561376	0	65.81105301	adgrl1a	862	0
1548	ENSDARG00000089399	0.036326848	1	1	-2.946479283	-1.560138686	8.70E-70	17.61966305	tmem176l.2	29	1.32E-68
1549	ENSDARG00000089429	0.294447657	1	1	-3.004137002	-2.224765463	0	139.7005743	si:dkey-205h13.2	428	0
1550	ENSDARG00000089536	0.037193104	4	1	2.454752721	0.02381243	2.96E-70	17.68051154	erbb4b	339	4.49E-69
1551	ENSDARG00000089643	0.421491306	7	1	-2.07017418	-5.374258799	0	199.7031266	mcama	4831	0
1552	ENSDARG00000089766	0.17011091	4	1	2.684204139	0.498421269	0	80.65188139	nrg3b	1097	0
1553	ENSDARG00000089769	0.078304972	14	1	4.412362852	-3.249625964	1.70E-303	37.21864791	hapln1a	246	5.61E-302
1554	ENSDARG00000089780	0.200414976	8	2	-1.421206914	6.36866446	0	95.15647736	si:dkey-288a3.2	299	0
1555	ENSDARG00000089790	0.070236938	7	1	-1.18789991	-5.059300227	1.35E-243	33.3106527	efna5a	1989	3.86E-242
1556	ENSDARG00000089856	0.046163909	15	1	-0.558445118	0.638483482	1.15E-106	21.90561457	cita	1496	2.14E-105
1557	ENSDARG00000089878	0.104615444	1	1	-2.197026692	-3.799556775	0	49.58870115	nedd9	4955	0
1558	ENSDARG00000089913	0.04344633	11	1	-0.4152961	-3.770088715	6.83E-95	20.63375344	cacna1g	844	1.20E-93
1559	ENSDARG00000090035	0.213518774	5	2	-2.702090703	5.559227185	0	101.3054387	rtn4r	464	0
1560	ENSDARG00000090063	0.041430252	1	1	-1.5568498	-2.848809523	1.94E-86	19.67017557	fa2h	1042	3.25E-85
1561	ENSDARG00000090081	0.033752759	4	1	1.964766898	-0.009217901	2.13E-58	16.06826838	si:dkey-1m11.5	215	2.96E-57
1562	ENSDARG00000090190	0.130827576	6	1	-2.655325614	-4.661731048	0	62.00638684	bcam	4605	0
1563	ENSDARG00000090230	0.050778647	14	1	5.367863454	-3.088588519	1.07E-128	24.10646928	tmem108	789	2.20E-127
1564	ENSDARG00000090253	0.048940035	11	1	0.066017621	-5.024144931	1.84E-181	28.70131721	zgc:113223	3	4.52E-180
1565	ENSDARG00000090268	0.041820031	11	1	0.119531937	-5.12602262	3.21E-88	19.87706887	krtt1c19e	328	5.45E-87
1566	ENSDARG00000090338	0.329826855	6	1	-3.981710635	-5.167449756	0	156.2960891	fam20cb	2698	0
1567	ENSDARG00000090387	0.037184296	12	2	-1.632133685	2.494377809	2.27E-70	17.6955577	onecut2	233	3.44E-69
1568	ENSDARG00000090489	0.209474017	3	2	0.025922545	5.232492166	0	99.44159217	ANKRD66	330	0
1569	ENSDARG00000090585	0.056179813	4	1	2.08981184	-1.120748369	3.63E-157	26.68374882	gpc1b	421	8.14E-156
1570	ENSDARG00000090697	0.034833793	15	1	-0.721815608	-0.205193205	1.01E-61	16.53576763	eif3ea	1611	1.44E-60
1571	ENSDARG00000090698	0.140260797	8	2	-1.501205645	7.586244779	0	66.56788834	si:dkey-52j6.3	468	0
1572	ENSDARG00000090785	0.094385907	15	1	-0.553163729	0.692419605	0	44.74538503	diaph3	3430	0
1573	ENSDARG00000090830	0.263268659	6	1	-2.372534476	-4.479871793	0	124.7465561	tmem132e	5539	0
1574	ENSDARG00000090969	0.070169345	1	1	-2.981115542	-1.52941118	8.73E-255	34.07472809	cbln18	28	2.58E-253
1575	ENSDARG00000091006	0.062547905	4	1	1.777540125	-0.442943884	8.96E-194	29.67148086	cobl	1213	2.27E-192
1576	ENSDARG00000091090	0.11683365	5	2	-2.052661143	6.304086881	0	55.4405294	xirp2b	491	0
1577	ENSDARG00000091116	0.038712847	1	1	-2.855266772	-3.303895755	5.63E-77	18.53263461	pkhd1l1	82	8.92E-76
1578	ENSDARG00000091150	0.060181636	15	1	-0.468085311	0.819979148	1.58E-179	28.54578209	mki67	1829	3.86E-178
1579	ENSDARG00000091266	0.079238278	3	2	0.018801473	6.533194738	0	37.75451494	si:ch211-71m22.5	125	0
1580	ENSDARG00000091293	0.084933348	3	2	-0.698761426	5.965600209	0	40.29573257	dmxl2	732	0
1581	ENSDARG00000091489	0.161452649	5	2	-2.310176335	5.365518766	0	76.72414021	cnbd1	215	0
1582	ENSDARG00000091585	0.051647672	8	2	-1.340998731	6.244960027	1.52E-134	24.6576359	kif28	98	3.19E-133
1583	ENSDARG00000091977	0.041047822	8	2	-1.313374839	6.741739946	9.65E-87	19.705619	BX470189.2	62	1.62E-85
1584	ENSDARG00000092099	0.225350509	4	1	2.901223936	-0.310418827	0	107.0469925	si:ch211-133n4.6	251	0
1585	ENSDARG00000092199	0.063710131	7	1	-0.844861351	-4.980369849	3.21E-201	30.2431657	si:ch211-250c4.4	684	8.26E-200
1586	ENSDARG00000092460	0.054366402	5	2	-1.83535286	6.355767923	1.42E-149	26.02146293	kifl	68	3.10E-148
1587	ENSDARG00000092469	0.03556534	1	1	-2.746545754	-3.200313373	4.29E-65	16.99742793	fndc7rs1	86	6.29E-64
1588	ENSDARG00000092552	0.036189495	1	1	-2.835661612	-3.147542281	6.20E-68	17.37667783	fndc7rs2	50	9.26E-67
1589	ENSDARG00000092638	0.047888463	12	2	-1.59810289	2.403819995	1.32E-114	22.72339232	ptprua	1333	2.55E-113
1590	ENSDARG00000092671	0.086926987	17	3	-3.237584076	0.689499097	0	41.21754075	pard3ba	2046	0
1591	ENSDARG00000092722	0.037083949	12	2	-2.200359068	2.961882787	6.76E-70	17.63393351	unc5da	313	1.02E-68
1592	ENSDARG00000092738	0.333476808	9	1	2.928250112	-1.344009502	0	158.0169678	si:ch211-263k4.2	4260	0
1593	ENSDARG00000092762	0.031112788	17	3	-3.347716771	0.776142793	9.60E-108	22.01838776	si:dkey-5i3.1	3	1.80E-106
1594	ENSDARG00000092813	0.112099667	1	1	-2.870277367	-3.200136228	0	53.3427694	fndc7rs4	152	0
1595	ENSDARG00000092944	0.039370486	6	1	-4.083080493	-5.189293666	2.20E-158	26.7885559	si:dkey-117n7.3	2	4.97E-157
1596	ENSDARG00000092987	0.238358568	5	2	-2.093033991	5.282458978	0	113.0033951	zmat4a	974	0
1597	ENSDARG00000093112	0.222047999	10	2	0.39933651	4.452292161	0	105.5541672	espnlb	195	0
1598	ENSDARG00000093117	0.102701919	5	2	-2.078688107	5.847001271	0	48.87721364	si:dkey-266m15.7	155	0
1599	ENSDARG00000093359	0.209584714	17	3	-3.348392687	0.792419629	0	100.3132526	inpp5jb	74	0
1600	ENSDARG00000093413	0.274651421	17	3	-2.998964987	0.548743682	0	130.2054919	edil3a	1177	0
1601	ENSDARG00000093492	0.218365187	5	2	-1.4787428	5.352074342	0	103.5743173	CR677617.1	580	0
1602	ENSDARG00000093614	0.054839946	2	1	0.780710139	-1.543019814	6.03E-150	26.05418137	CT025909.3	355	1.32E-148
1603	ENSDARG00000093781	0.047783952	3	2	0.444899626	5.772608476	1.12E-114	22.73040381	lrriq1	219	2.17E-113
1604	ENSDARG00000093799	0.03400135	4	1	2.17733983	0.792157965	6.83E-59	16.13863879	setbp1	2344	9.52E-58
1605	ENSDARG00000094210	0.074768401	3	2	0.669114866	6.737517552	6.08E-281	35.79733536	fthl31	68	1.90E-279
1606	ENSDARG00000094454	0.436234272	3	2	0.245073038	5.774882512	0	206.7771639	cdh23	1124	0
1607	ENSDARG00000094540	0.080314208	5	2	-2.031394206	6.101991372	0	38.31183126	si:dkey-96l17.6	105	0
1608	ENSDARG00000094579	0.039294003	5	2	-1.149994574	5.547179418	3.44E-80	18.92672379	b4galnt2.1	41	5.59E-79
1609	ENSDARG00000094587	0.2140509	4	1	2.41711215	0.830593424	0	101.4665179	si:dkey-35m8.1	1691	0
1610	ENSDARG00000094677	0.081401584	5	2	-1.792591057	6.298108773	0	38.74095571	si:dkey-92j12.5	154	0
1611	ENSDARG00000094704	0.085402399	13	1	0.555406161	-3.309117598	0	40.48571809	bcl2a	5932	0
1612	ENSDARG00000094738	0.410077672	8	2	-1.267899833	6.591377454	0	194.5032894	loxhd1a	521	0
1613	ENSDARG00000094792	0.110076729	3	2	0.363874503	6.594993787	0	52.3095371	twf2a	237	0
1614	ENSDARG00000095022	0.052763089	4	1	1.320346751	-0.580581797	8.65E-139	25.05038328	thsd7ba	585	1.84E-137
1615	ENSDARG00000095268	0.112130526	11	1	0.111062639	-3.420467896	0	53.17229519	si:dkey-261h17.1	1441	0
1616	ENSDARG00000095301	0.070744473	6	1	-3.871947966	-4.761466069	2.47E-247	33.56789781	BX247868.1	712	7.10E-246
1617	ENSDARG00000095339	0.120159401	16	1	4.020901718	-4.093964858	0	57.04595329	si:dkeyp-44a8.4	381	0
1618	ENSDARG00000095347	0.308704105	8	2	-1.416917644	7.657556729	0	147.1014597	si:dkeyp-72h1.1	108	0
1619	ENSDARG00000095365	0.0455169	12	2	-1.396801434	2.188253837	7.09E-105	21.71698292	BX323065.1	129	1.31E-103
1620	ENSDARG00000095377	0.059075357	8	2	-1.644748889	7.604850011	1.55E-176	28.30374672	CR388207.1	61	3.75E-175
1621	ENSDARG00000095557	0.038136469	12	2	-1.403678618	2.205700832	1.10E-73	18.12061301	BX664610.1	432	1.70E-72
1622	ENSDARG00000095562	0.210597076	5	2	-2.787826024	5.548176484	0	100.3386582	si:ch73-138i16.1	117	0
1623	ENSDARG00000095580	0.139453161	7	1	-1.608364902	-4.596247239	0	66.19104893	si:ch211-67e16.11	433	0
1624	ENSDARG00000095603	0.177491766	3	2	-0.732425473	5.908987718	0	84.21055829	grid2ipb	501	0
1625	ENSDARG00000095632	0.044232036	1	1	-1.97022172	-2.59932558	2.72E-98	21.00887535	CR927456.1	501	4.88E-97
1626	ENSDARG00000095696	0.054202641	1	1	-2.667194806	-2.600106521	1.25E-146	25.75997999	trpm2	314	2.71E-145
1627	ENSDARG00000095715	0.066244337	11	1	-0.444557212	-3.028430982	4.92E-217	31.4229366	BX465834.1	1744	1.33E-215
1628	ENSDARG00000095865	0.267258231	14	1	4.539922513	-2.738672418	0	126.7196533	oxr1a	839	0
1629	ENSDARG00000095906	0.03411513	12	2	-1.450635872	2.259386735	1.48E-59	16.23271199	CR848047.1	253	2.08E-58
1630	ENSDARG00000095969	0.040519609	5	2	-2.727810345	5.478206353	1.39E-89	20.03393892	si:ch73-106g13.1	17	2.38E-88
1631	ENSDARG00000096147	0.064625341	9	1	2.507553615	-3.081150098	5.81E-207	30.67677312	BX465862.4	544	1.53E-205
1632	ENSDARG00000096286	0.047128833	8	2	-1.779753647	7.419892507	9.25E-117	22.94010435	BX005368.1	25	1.81E-115
1633	ENSDARG00000096327	0.089150687	8	2	-0.489013336	7.199406819	0	42.45583238	cd164l2	139	0
1634	ENSDARG00000096508	0.047307725	14	1	5.366228856	-3.066256089	7.12E-128	24.02780379	BX322618.1	11	1.45E-126
1635	ENSDARG00000096521	0.044805728	1	1	-2.961993657	-1.553234084	2.89E-108	22.07273753	CR626889.1	16	5.42E-107
1636	ENSDARG00000096542	0.065828	3	2	0.078404479	5.176314073	2.11E-215	31.30328362	BX649533.1	235	5.65E-214
1637	ENSDARG00000096546	0.132326562	9	1	3.128249683	-1.645006759	0	62.73787444	nrp2a	1536	0
1638	ENSDARG00000096755	0.051324727	6	1	-2.468242608	-4.810485406	2.28E-132	24.4540353	si:ch211-202p1.5	162	4.74E-131
1639	ENSDARG00000096800	0.137665063	3	2	0.135864668	5.464857297	0	65.31896217	si:ch211-277e21.1	564	0
1640	ENSDARG00000096859	0.393938669	5	2	-1.42462667	5.732313352	0	186.9631609	si:ch211-286b4.4	343	0
1641	ENSDARG00000096879	0.058908177	2	1	0.968268074	-0.105303748	1.33E-172	27.98244229	CU462980.1	349	3.15E-171
1642	ENSDARG00000096887	0.269146308	9	1	3.342165746	-3.545283599	0	127.5559591	CR381618.1	2040	0
1643	ENSDARG00000096896	0.05743882	14	1	5.352455892	-3.078235431	3.55E-173	28.02954049	BX004991.1	26	8.43E-172
1644	ENSDARG00000096920	0.033411035	10	2	0.344281696	4.4702179	5.22E-58	16.01258759	si:zfos-375h5.1	65	7.21E-57
1645	ENSDARG00000096926	0.037613458	12	2	-1.855532847	3.219506936	5.87E-158	26.75191278	BX005392.1	2	1.32E-156
1646	ENSDARG00000096971	0.07018349	3	2	-0.018423281	6.561754899	9.02E-246	33.46061901	si:dkey-206p8.1	110	2.59E-244
1647	ENSDARG00000096991	0.086559327	12	2	-2.393253527	3.763070779	0	41.07677587	CR847968.1	622	0
1648	ENSDARG00000096997	0.043572308	18	4	18.13735894	-3.388031526	2.15E-95	20.68966163	CR589876.1	601	3.79E-94
1649	ENSDARG00000097055	0.059830606	7	1	-1.82576438	-5.137057586	1.77E-177	28.38023801	si:ch211-284f22.3	1783	4.29E-176
1650	ENSDARG00000097145	0.081481646	2	1	1.047243156	-1.649253352	0	38.6293459	FP565432.1	4756	0
1651	ENSDARG00000097176	0.07562609	3	2	0.65178717	6.900066095	2.40E-287	36.2065853	BX927308.2	61	7.61E-286
1652	ENSDARG00000097318	0.037950591	10	2	0.526432164	3.035831409	2.82E-92	20.34043751	BX649242.1	6	4.91E-91
1653	ENSDARG00000097372	0.031314094	10	2	0.574827947	3.849910932	2.83E-52	15.16918873	si:ch211-139d20.3	35	3.74E-51
1654	ENSDARG00000097415	0.036238292	3	2	-0.222426705	6.283667283	5.08E-67	17.25552346	lrrc53	178	7.55E-66
1655	ENSDARG00000097421	0.043401285	3	2	0.579646297	6.84985085	5.41E-98	20.97620965	si:dkeyp-50b9.1	38	9.67E-97
1656	ENSDARG00000097478	0.046268201	2	1	1.662117638	-2.588928146	4.49E-107	21.94839748	qkia	3662	8.38E-106
1657	ENSDARG00000097538	0.040153298	10	2	0.527607181	3.520983892	4.39E-84	19.39337196	CR627496.1	40	7.28E-83
1658	ENSDARG00000097553	0.086306446	14	1	5.34045247	-3.035301013	0	43.43637656	BX908750.1	11	0
1659	ENSDARG00000097671	0.052352059	2	1	1.385570087	-2.394043727	7.76E-138	24.96275408	CR381579.3	123	1.65E-136
1660	ENSDARG00000097714	0.099381335	2	1	1.683147587	-2.739760919	0	47.12977637	FP017215.1	1083	0
1661	ENSDARG00000097724	0.05548809	6	1	-4.081766329	-4.937362475	1.96E-154	26.44734763	BX936342.2	133	4.35E-153
1662	ENSDARG00000097747	0.058155544	2	1	1.700683989	-2.752211018	8.43E-168	27.58496411	CU464118.1	1970	1.97E-166
1663	ENSDARG00000097841	0.051152302	9	1	3.083954133	-3.29806046	8.84E-131	24.30422646	CR933730.1	360	1.83E-129
1664	ENSDARG00000097869	0.059276435	4	1	2.118865528	-0.013447447	1.26E-174	28.14823244	si:dkey-1m11.6	476	3.01E-173
1665	ENSDARG00000097875	0.048340679	12	2	-2.24662777	2.87377234	9.85E-118	23.03732598	CR786577.1	153	1.93E-116
1666	ENSDARG00000097897	0.090257231	5	2	-1.549787841	5.653381543	0	42.79644666	sgip1a	1836	0
1667	ENSDARG00000097950	0.047042174	11	1	-0.48003634	-3.543461604	9.83E-111	22.32820324	BX663520.2	1323	1.87E-109
1668	ENSDARG00000098005	0.034863604	4	1	1.830705203	-0.201921446	7.31E-62	16.55550132	BX004996.1	886	1.04E-60
1669	ENSDARG00000098045	0.0734485	4	1	2.020199813	0.731100397	7.62E-267	34.87945777	CR751602.2	380	2.31E-265
1670	ENSDARG00000098057	0.41749598	3	2	-0.923558913	6.292974191	0	197.8882854	dscaml1	1173	0
1671	ENSDARG00000098076	0.20672722	3	2	-0.151739053	4.85142632	0	98.12842344	kcnq1.2	342	0
1672	ENSDARG00000098161	0.044873869	12	2	-2.220527611	3.060997443	1.91E-101	21.35107209	cntn4	251	3.47E-100
1673	ENSDARG00000098240	0.069745263	7	1	-2.443826161	-5.632609649	3.12E-240	33.07764609	meis2a	1711	8.81E-239
1674	ENSDARG00000098252	0.089982203	5	2	-3.004247151	5.718481736	0	42.93462644	cpne9	99	0
1675	ENSDARG00000098257	0.500811737	3	2	0.217681103	5.462496953	0	237.3361954	pcdh15a	1767	0
1676	ENSDARG00000098294	0.206606954	7	1	-0.923411332	-4.638702912	0	97.98350169	col5a3a	969	0
1677	ENSDARG00000098295	0.040189395	6	1	-3.752139292	-5.050361438	2.10E-81	19.07347923	efna3b	1499	3.43E-80
1678	ENSDARG00000098308	0.173359849	10	2	0.322949656	3.46224566	0	82.15878505	CR936540.1	3601	0
1679	ENSDARG00000098315	0.04493319	17	3	-3.350950442	0.658369141	1.96E-101	21.34967169	cyp1a	366	3.58E-100
1680	ENSDARG00000098349	0.0343576	15	1	-0.601139567	0.355793791	4.59E-60	16.30444566	hdac4	7217	6.46E-59
1681	ENSDARG00000098359	0.054699345	2	1	0.493520566	-1.869313104	1.03E-148	25.94511569	il17rd	2643	2.25E-147
1682	ENSDARG00000098368	0.078856827	12	2	-2.271195851	3.482171254	5.64E-307	37.43319894	aplp1	468	1.88E-305
1683	ENSDARG00000098390	0.062525422	5	2	-2.639271699	5.461893754	3.28E-195	29.78257763	si:ch211-76m11.8	160	8.35E-194
1684	ENSDARG00000098392	0.03389322	1	1	-2.477564536	-3.242587132	1.17E-58	16.10542424	ly6pge	464	1.63E-57
1685	ENSDARG00000098395	0.050207944	12	2	-1.496743284	2.306790071	4.18E-126	23.85805578	CU929451.2	340	8.45E-125
1686	ENSDARG00000098428	0.072400463	17	3	-3.392628871	0.826673703	8.82E-260	34.4103761	asic1c	276	2.63E-258
1687	ENSDARG00000098430	0.039864704	2	1	1.27158431	-1.567278249	5.91E-158	26.75165124	znf1078	2	1.33E-156
1688	ENSDARG00000098435	0.135880009	5	2	-1.803853474	6.39441319	0	64.42003523	BX005003.1	1405	0
1689	ENSDARG00000098512	0.06031928	12	2	-1.454269372	2.261102395	1.23E-180	28.63507669	si:ch73-215f7.1	549	3.01E-179
1690	ENSDARG00000098641	0.082463969	3	2	-0.161732994	5.622905927	0	39.11278557	nbeal2	1167	0
1691	ENSDARG00000098652	0.126125032	17	3	-3.038095198	0.912805753	0	59.80446918	pcdh11	1162	0
1692	ENSDARG00000098753	0.175413622	6	1	-3.290829144	-5.310793681	0	83.1302901	elmo1	3890	0
1693	ENSDARG00000098766	0.14755467	4	1	2.191739597	0.025875824	0	69.93605788	pcxa	3348	0
1694	ENSDARG00000098815	0.054478224	5	2	-2.153748713	5.342329698	3.75E-149	25.98400273	CU571064.1	115	8.20E-148
1695	ENSDARG00000098856	0.042029791	14	1	4.96037177	-2.501774712	2.26E-89	20.00988564	RYR2	200	3.85E-88
1696	ENSDARG00000098880	0.457554123	3	2	-0.924262248	6.083798604	0	216.9075804	pclob	895	0
1697	ENSDARG00000098954	0.088296732	1	1	-2.808729373	-2.619728966	0	41.86736852	stard13b	2005	0
1698	ENSDARG00000099020	0.033041371	9	1	2.667544164	-2.751249356	8.66E-57	15.83689474	CT025874.1	70	1.18E-55
1699	ENSDARG00000099034	0.184029445	7	1	-1.026339732	-4.71315269	0	87.21382047	unc5a	3618	0
1700	ENSDARG00000099093	0.045967664	15	1	-0.613283835	0.469517188	1.05E-105	21.80441491	dock1	6628	1.96E-104
1701	ENSDARG00000099124	0.112991646	2	1	1.295648851	-1.798611088	0	53.5747352	f3a	1430	0
1702	ENSDARG00000099133	0.118797162	17	3	-3.29708334	0.818332033	0	56.43069883	UNC5C	292	0
1703	ENSDARG00000099144	0.084698034	4	1	2.060570039	0.165639358	0	40.19311596	igfbp3	621	0
1704	ENSDARG00000099149	0.095982281	6	1	-4.023614131	-4.876954837	0	45.5911372	hs3st3b1a	317	0
1705	ENSDARG00000099197	0.056721053	18	4	18.17278794	-3.423295302	9.76E-160	26.90438509	actc1b	2000	2.22E-158
1706	ENSDARG00000099220	0.299203027	6	1	-2.867938958	-5.345987601	0	141.7673235	BX571942.1	6134	0
1707	ENSDARG00000099221	0.0679909	5	2	-2.294934712	5.48953505	5.97E-229	32.28344974	ppp2r2bb	438	1.65E-227
1708	ENSDARG00000099227	0.044089491	14	1	4.666073121	-2.164110346	1.02E-98	21.05538931	galnt13	99	1.84E-97
1709	ENSDARG00000099240	0.036776735	5	2	-1.578623138	4.722251134	8.94E-69	17.4873946	acap3b	320	1.34E-67
1710	ENSDARG00000099283	0.049735946	15	1	-0.265890978	0.069701748	2.18E-123	23.59470471	epb41a	2076	4.40E-122
1711	ENSDARG00000099284	0.035456764	2	1	1.818644323	-1.568799121	7.22E-158	26.74414414	si:dkey-228b2.6	2	1.62E-156
1712	ENSDARG00000099323	0.125212606	1	1	-2.605284653	-1.91040699	0	59.36276778	dlg2	1643	0
1713	ENSDARG00000099351	0.034404615	13	1	2.459586896	-3.978341384	2.62E-60	16.33853968	igfbp1a	778	3.70E-59
1714	ENSDARG00000099385	0.036267092	6	1	-2.894154749	-5.108386321	9.03E-67	17.22234072	lsp1b	803	1.34E-65
1715	ENSDARG00000099395	0.07920819	8	2	-1.571104012	7.695335584	0	37.62998129	cables1	345	0
1716	ENSDARG00000099672	0.154617781	3	2	-0.570459745	6.172563748	0	73.3942504	capgb	372	0
1717	ENSDARG00000099729	0.06792768	2	1	1.102133133	-1.338955028	4.07E-228	32.22402335	pcdh10a	999	1.12E-226
1718	ENSDARG00000099732	0.13305126	5	2	-2.506039343	6.278591352	0	63.1007591	gfra1a	822	0
1719	ENSDARG00000099776	0.050176574	4	1	2.62611083	0.534851985	1.98E-127	23.9853868	glula	79	4.02E-126
1720	ENSDARG00000099841	0.127150782	5	2	-2.888242207	5.667685704	0	60.32746214	prkcab	569	0
1721	ENSDARG00000099849	0.314121962	4	1	1.945216216	0.342771607	0	148.8333728	ebf3a	6901	0
1722	ENSDARG00000099850	0.039697566	12	2	-2.115128241	3.024051147	7.07E-80	18.88862521	iqsec3a	235	1.15E-78
1723	ENSDARG00000099871	0.207131274	3	2	0.368556686	5.675109582	0	98.25447805	myo7aa	544	0
1724	ENSDARG00000099919	0.072971679	7	1	-1.94021102	-5.800457282	7.25E-264	34.68241022	CR407584.1	293	2.18E-262
1725	ENSDARG00000099923	0.037951327	1	1	-2.758928977	-3.133204503	2.05E-73	18.08607326	zgc:154054	193	3.18E-72
1726	ENSDARG00000099930	0.147168651	9	1	2.933951415	-1.653199954	0	69.75629877	col27a1b	2335	0
1727	ENSDARG00000099970	0.183128292	7	1	-2.155851803	-6.132867141	0	86.80501007	CR383676.2	18441	0
1728	ENSDARG00000099979	0.323455612	9	1	2.444843091	-2.446402235	0	153.2697902	tgfbr3	3091	0
1729	ENSDARG00000100053	0.050597948	1	1	-2.588024579	-2.745160265	5.46E-128	24.03888426	CABZ01044099.1	393	1.11E-126
1730	ENSDARG00000100055	0.189647572	9	1	2.762572326	-2.836891694	0	89.87688524	tox2	3037	0
1731	ENSDARG00000100141	0.035914594	3	2	-0.070060633	6.006398397	9.33E-66	17.08662312	CR626874.1	274	1.37E-64
1732	ENSDARG00000100222	0.0469717	1	1	-2.649289809	-2.885879559	2.75E-110	22.28227048	utrn	3174	5.21E-109
1733	ENSDARG00000100236	0.04448226	3	2	0.113401987	6.024087148	1.28E-99	21.15357173	cspp1a	264	2.32E-98
1734	ENSDARG00000100244	0.444605759	4	1	1.871627726	-0.176015897	0	210.6488791	ebf3a	5654	0
1735	ENSDARG00000100308	0.037992649	4	1	1.355040826	-0.489579542	5.88E-73	18.02790338	SEMA4F	3663	9.08E-72
1736	ENSDARG00000100313	0.032246564	3	2	-0.585759781	6.119622903	2.70E-53	15.32268443	pip5k1cb	534	3.59E-52
1737	ENSDARG00000100465	0.02921495	1	1	-2.3978016	-3.440842671	3.39E-66	17.14551487	clrn3	3	5.01E-65
1738	ENSDARG00000100476	0.172010357	1	1	-2.959826909	-1.550830347	0	82.49873748	si:dkeyp-110c7.4	59	0
1739	ENSDARG00000100494	0.092480267	7	1	-2.311804972	-6.280206485	0	43.84932334	pbx1a	1845	0
1740	ENSDARG00000100499	0.095558071	5	2	-2.127022229	5.257284837	0	45.30526162	cpeb4b	2146	0
1741	ENSDARG00000100518	0.036530136	11	1	0.035564192	-4.9162219	5.57E-68	17.38283888	CR387919.1	299	8.32E-67
1742	ENSDARG00000100560	0.053145487	7	1	-2.556178055	-5.929558082	1.40E-140	25.21417945	zfpm2b	1332	2.99E-139
1743	ENSDARG00000100592	0.169336361	3	2	0.148763895	5.586892324	0	80.33503808	slc8a2b	550	0
1744	ENSDARG00000100606	0.052464743	9	1	3.169920959	-1.650163932	3.20E-137	24.90607964	ARHGEF25	600	6.77E-136
1745	ENSDARG00000100691	0.035727119	4	1	2.523633041	0.632304387	1.45E-65	17.06088916	prss35	99	2.13E-64
1746	ENSDARG00000100725	0.049676941	1	1	-1.301623784	-3.57465033	4.34E-123	23.56563218	ephb4a	2677	8.74E-122
1747	ENSDARG00000100728	0.038733851	8	2	-0.58899226	7.50718041	3.77E-78	18.67761535	mkrn2os.2	42	6.01E-77
1748	ENSDARG00000100847	0.32634134	14	1	4.608098306	-2.623959465	0	154.7988669	esrrb	508	0
1749	ENSDARG00000100969	0.045314867	1	1	-1.731781684	-2.389229579	1.61E-104	21.6793286	tmprss13a	155	2.97E-103
1750	ENSDARG00000100971	0.038523386	1	1	-2.535352431	-2.92878346	2.73E-76	18.44749781	fxyd6	94	4.31E-75
1751	ENSDARG00000100973	0.404039684	6	1	-3.109327994	-5.17718677	0	191.4323147	arhgap24	5789	0
1752	ENSDARG00000100981	0.037739921	3	2	-0.426671408	5.349094586	1.53E-72	17.97510125	CCDC39	165	2.35E-71
1753	ENSDARG00000101020	0.180304285	9	1	3.151839294	-1.684915943	0	85.51631708	KHDRBS3	643	0
1754	ENSDARG00000101081	0.25735776	1	1	-2.520775996	-3.198904796	0	121.9420991	ptprub	8160	0
1755	ENSDARG00000101131	0.04364592	14	1	4.069512405	-2.933670325	1.21E-95	20.71710671	pbx1b	934	2.15E-94
1756	ENSDARG00000101175	0.044329779	10	2	0.035187848	4.654273706	1.56E-98	21.03522899	mcu	1774	2.81E-97
1757	ENSDARG00000101199	0.105545657	11	1	0.089981221	-5.081663413	0	50.37494341	rbp4	90	0
1758	ENSDARG00000101209	0.065678479	2	1	0.39783337	-3.135963483	2.43E-213	31.15138317	lamb1a	1817	6.47E-212
1759	ENSDARG00000101211	0.049148251	5	2	-1.514197431	5.501833158	5.60E-121	23.35883606	BX537130.1	309	1.12E-119
1760	ENSDARG00000101244	0.063470358	2	1	1.090539135	-0.87575433	1.92E-199	30.10772799	gli1	1307	4.93E-198
1761	ENSDARG00000101348	0.074171585	8	2	-1.151561819	7.60921021	4.84E-274	35.35100166	plppr5b	119	1.49E-272
1762	ENSDARG00000101363	0.342252051	5	2	-1.554768286	4.627623277	0	162.3114314	ano2b	619	0
1763	ENSDARG00000101419	0.048123686	6	1	-4.02658578	-4.803594155	3.93E-116	22.87709104	drp2	284	7.65E-115
1764	ENSDARG00000101441	0.084394955	13	1	1.306602516	-3.629841847	0	40.01199483	lima1a	3226	0
1765	ENSDARG00000101457	0.089683269	7	1	-1.706299983	-4.977187438	0	42.52665061	cdc42ep4a	1512	0
1766	ENSDARG00000101482	0.035897137	1	1	-2.510589085	-2.1238939	2.16E-65	17.03748417	hk2	2232	3.18E-64
1767	ENSDARG00000101568	0.055931135	16	1	3.819970645	-4.083879752	1.07E-155	26.55694294	CR352338.1	555	2.38E-154
1768	ENSDARG00000101569	0.056532617	8	2	-1.133711062	6.945851522	7.97E-159	26.82632705	ppargc1b	931	1.81E-157
1769	ENSDARG00000101584	0.042282772	11	1	-0.419031046	-2.983140035	5.22E-90	20.08275546	CU467822.2	757	8.96E-89
1770	ENSDARG00000101606	0.20474574	8	2	-1.013896666	6.706181722	0	97.1592629	rims2a	428	0
1771	ENSDARG00000101613	0.042636895	7	1	-2.478995524	-5.912105365	3.17E-93	20.44744731	si:dkey-238i5.2	57	5.53E-92
1772	ENSDARG00000101637	0.1276916	2	1	0.442199119	-1.208679838	0	60.53515321	ccnd1	1834	0
1773	ENSDARG00000101670	0.033569941	15	1	-0.593403123	0.445924955	1.60E-57	15.94269959	kntc1	942	2.20E-56
1774	ENSDARG00000101679	0.04618169	3	2	0.324178197	7.038598256	3.79E-109	22.16434485	cfap52	53	7.15E-108
1775	ENSDARG00000101701	0.042423878	2	1	1.230849244	-1.828361733	1.71E-90	20.13819182	bmp5	910	2.95E-89
1776	ENSDARG00000101743	0.031492973	8	2	-0.744031332	7.398050504	6.62E-52	15.11327754	C5H11orf1	59	8.74E-51
1777	ENSDARG00000101816	0.079402828	11	1	0.046881907	-4.978734298	0	37.86917243	col5a3b	120	0
1778	ENSDARG00000101858	0.05151453	1	1	-1.710173688	-2.338512463	2.91E-132	24.44409637	DST	1387	6.04E-131
1779	ENSDARG00000101869	0.133951566	1	1	-2.038380347	-2.802427573	0	63.48510884	wu:fi36a10	5214	0
1780	ENSDARG00000101891	0.04116329	15	1	-0.217284165	-0.019149942	3.03E-85	19.53039626	arid1ab	3322	5.05E-84
1781	ENSDARG00000101894	0.040062338	10	2	0.369010859	4.591952996	3.46E-81	19.04730002	stk10	325	5.65E-80
1782	ENSDARG00000101899	0.120107991	5	2	-2.606398545	5.787957864	0	57.39240876	kncn	73	0
1783	ENSDARG00000101919	0.086508874	3	2	0.65496222	6.760363298	0	41.17570555	foxj1a	154	0
1784	ENSDARG00000101980	0.122626389	2	1	1.341712155	-2.265021963	0	58.1650781	bmper	776	0
1785	ENSDARG00000101983	0.032479225	2	1	0.849350728	-1.014765827	5.74E-54	15.4228971	pkn2	1112	7.68E-53
1786	ENSDARG00000102015	0.038684023	1	1	-1.53919693	-3.260702653	1.36E-75	18.36071398	CABZ01037298.1	1592	2.13E-74
1787	ENSDARG00000102017	0.036582525	11	1	-0.430379174	-3.773867888	1.21E-68	17.46990012	trpc4b	218	1.82E-67
1788	ENSDARG00000102082	0.094106802	1	1	-2.063645325	-2.265134616	0	44.62748893	nr3c2	1311	0
1789	ENSDARG00000102142	0.038264155	1	1	-2.497559987	-3.131535573	5.36E-74	18.15994084	ece2b	1775	8.35E-73
1790	ENSDARG00000102153	0.087168681	2	1	1.260183849	-2.367551608	0	41.33603378	nrp1a	1602	0
1791	ENSDARG00000102161	0.055023428	6	1	-4.08804103	-4.838093562	2.84E-151	26.17101838	sdk2a	218	6.27E-150
1792	ENSDARG00000102180	0.04854171	6	1	-3.904394827	-4.539746327	1.28E-117	23.02585066	shroom3	3459	2.52E-116
1793	ENSDARG00000102216	0.054057035	4	1	2.383246698	0.533299523	2.85E-145	25.63841265	dlg1l	3694	6.17E-144
1794	ENSDARG00000102300	0.045469497	4	1	2.848449745	-0.234739704	4.12E-104	21.63600869	ca9	204	7.60E-103
1795	ENSDARG00000102312	0.055385619	5	2	-1.661879144	4.514445024	7.87E-154	26.39475338	scn5lab	137	1.74E-152
1796	ENSDARG00000102366	0.077043961	3	2	-0.162446342	5.239195066	6.66E-295	36.68362198	micall2a	143	2.16E-293
1797	ENSDARG00000102406	0.049479854	6	1	-3.476754151	-4.544353051	2.09E-122	23.49887639	si:ch211-165e15.1	593	4.19E-121
1798	ENSDARG00000102445	0.039717448	11	1	-0.200001619	-3.048582358	1.20E-79	18.86088815	si:dkey-22o22.2	861	1.94E-78
1799	ENSDARG00000102447	0.038025939	10	2	0.526970394	4.295105176	1.18E-73	18.1167575	gdpd4a	168	1.83E-72
1800	ENSDARG00000102464	0.125040865	2	1	1.697085061	-2.027780814	0	59.283601	wnt5b	1448	0
1801	ENSDARG00000102470	0.047120778	1	1	-1.999028168	-2.578459902	5.14E-111	22.35719928	mpp7a	1795	9.80E-110
1802	ENSDARG00000102491	0.038799564	5	2	-2.510729275	6.19719954	5.79E-79	18.77731518	gpr142	33	9.32E-78
1803	ENSDARG00000102506	0.370172499	9	1	2.932914533	-1.860466046	0	175.4025548	lrp2a	3255	0
1804	ENSDARG00000102564	0.032476884	7	1	-2.115180455	-6.107819362	3.96E-54	15.44687744	gfra1b	287	5.31E-53
1805	ENSDARG00000102626	0.100832464	11	1	-0.636726103	-4.113363547	0	47.80866913	frem2b	2172	0
1806	ENSDARG00000102650	0.055815128	4	1	3.081476011	-0.610195739	1.50E-157	26.71674037	BX248331.2	68	3.38E-156
1807	ENSDARG00000102690	0.086874198	8	2	-0.840111695	7.364454465	0	41.27505976	rims2b	289	0
1808	ENSDARG00000102730	0.057160455	12	2	-1.974876128	2.813955741	1.11E-162	27.15475556	mapk10	365	2.56E-161
1809	ENSDARG00000102750	0.077067708	11	1	-0.115521632	-4.202392383	1.35E-292	36.53855772	cdh1	5041	4.35E-291
1810	ENSDARG00000102773	0.352938231	3	2	-0.110128157	5.20079823	0	167.3283911	cacna1da	855	0
1811	ENSDARG00000102820	0.067717313	8	2	-0.924685441	7.305250363	6.24E-227	32.13923306	cib2	614	1.72E-225
1812	ENSDARG00000102824	0.032225824	4	1	2.516389646	0.75353785	2.76E-53	15.32117449	pcdh10b	445	3.67E-52
1813	ENSDARG00000102832	0.040978673	15	1	-0.678016208	0.145462351	1.49E-84	19.44868566	baz1b	1448	2.48E-83
1814	ENSDARG00000102855	0.087513463	4	1	1.493919053	-0.796230374	0	41.48461759	neo1a	9916	0
1815	ENSDARG00000102879	0.034941985	11	1	-0.393669568	-2.990494771	4.05E-62	16.59090386	myt1b	1317	5.82E-61
1816	ENSDARG00000102883	0.092168095	3	2	-0.176154397	6.268649774	0	43.70316189	sptbn1	1741	0
1817	ENSDARG00000102995	0.347809908	10	2	0.629114516	4.061679082	0	164.8586319	rbm24a	1348	0
1818	ENSDARG00000103002	0.350244462	3	2	-0.411259792	6.337104039	0	166.0853418	nptna	658	0
1819	ENSDARG00000103057	0.047173998	7	1	-2.54634615	-6.000724597	3.39E-111	22.37573863	zfhx3	7179	6.47E-110
1820	ENSDARG00000103109	0.13910469	4	1	2.047285356	-0.226401312	0	65.95850109	chl1b	1059	0
1821	ENSDARG00000103117	0.04892511	1	1	-1.429759703	-2.236724062	1.60E-119	23.21519505	tmprss4a	1321	3.16E-118
1822	ENSDARG00000103155	0.040150166	2	1	0.918588437	-1.691913409	3.20E-81	19.05145505	ext1a	2510	5.23E-80
1823	ENSDARG00000103156	0.226934172	14	1	5.366020479	-3.087013526	0	107.7506336	gpc6a	333	0
1824	ENSDARG00000103184	0.080292588	3	2	-0.006809674	4.877384381	0	38.2814072	si:ch211-102l7.3	111	0
1825	ENSDARG00000103187	0.028938376	4	1	2.546839275	0.631586151	9.04E-62	16.54269901	syce2	5	1.29E-60
1826	ENSDARG00000103264	0.083541509	3	2	0.49358625	7.213328557	0	40.38403596	si:dkey-25g12.4	31	0
1827	ENSDARG00000103380	0.040954548	5	2	-2.148522101	6.251155572	1.07E-84	19.4656349	si:ch73-21k16.1	353	1.79E-83
1828	ENSDARG00000103388	0.034737216	1	1	-1.480064116	-3.430161519	2.33E-61	16.48554226	znf609a	3845	3.31E-60
1829	ENSDARG00000103390	0.260257335	3	2	-0.339394889	5.333099561	0	123.3708954	cacna2d2a	1253	0
1830	ENSDARG00000103435	0.111547872	3	2	-0.761421881	6.422778325	0	52.9085633	sorbs1	803	0
1831	ENSDARG00000103479	0.157627178	1	1	-2.30547329	-4.011160178	0	74.7002805	ptprfa	5984	0
1832	ENSDARG00000103515	0.58994243	16	1	4.074077167	-4.120758815	0	279.8518296	vcana	486	0
1833	ENSDARG00000103554	0.066720666	10	2	0.467400737	2.619836049	5.22E-220	31.63988561	notch1a	2895	1.42E-218
1834	ENSDARG00000103647	0.101569465	2	1	1.129160799	-2.232653065	0	48.15624401	gpc5a	1736	0
1835	ENSDARG00000103648	0.349587581	4	1	1.949423589	-1.335970206	0	165.656223	znf536	2795	0
1836	ENSDARG00000103658	0.071457881	13	1	1.863156595	-3.760567708	5.62E-252	33.88457995	hivep1	2649	1.63E-250
1837	ENSDARG00000103666	0.042927129	11	1	-0.008411936	-4.733603997	3.28E-93	20.44570714	dapk2b	226	5.73E-92
1838	ENSDARG00000103672	0.03622931	15	1	-1.020219288	-0.208172305	1.48E-66	17.19356736	cirbpa	2741	2.20E-65
1839	ENSDARG00000103735	0.040683037	1	1	-1.754521571	-2.319241567	1.97E-83	19.31608628	elovl1b	947	3.25E-82
1840	ENSDARG00000103736	0.092032826	8	2	-1.786647759	7.3598177	0	43.75059185	gramd2aa	228	0
1841	ENSDARG00000103747	0.041510025	1	1	-2.993019543	-2.287822647	6.18E-87	19.72819308	cav1	333	1.04E-85
1842	ENSDARG00000103754	0.050111323	15	1	-0.486441873	0.814953165	2.78E-125	23.77867279	aspm	1225	5.61E-124
1843	ENSDARG00000103774	0.117325512	9	1	2.974119701	-1.276668591	0	55.61448908	limch1b	3073	0
1844	ENSDARG00000103848	0.10095989	5	2	-1.610473595	6.031789498	0	47.92066395	apba1a	450	0
1845	ENSDARG00000103854	0.034847654	13	1	0.693310954	-3.764938874	9.50E-62	16.53967836	pdlim7	2396	1.35E-60
1846	ENSDARG00000103903	0.135950987	7	1	-2.173130951	-6.144912047	0	64.52581569	LO017650.1	385	0
1847	ENSDARG00000104005	0.033228533	4	1	2.571692266	0.640587645	1.11E-56	15.82097967	slc4a3	191	1.52E-55
1848	ENSDARG00000104034	0.126379706	6	1	-2.942371092	-4.750270409	0	59.90043849	arid3b	4131	0
1849	ENSDARG00000104068	0.121875561	3	2	0.672451385	6.905761438	0	57.94294497	gstp1	210	0
1850	ENSDARG00000104082	0.03249111	15	1	-0.936349712	0.747352319	5.82E-54	15.42206715	trps1	3125	7.77E-53
1851	ENSDARG00000104089	0.041366877	16	1	4.079332628	-4.276557965	4.60E-86	19.62639373	p3h4	3672	7.70E-85
1852	ENSDARG00000104100	0.202096018	2	1	0.996734716	-0.329707129	0	95.77341247	bmpr1ba	3268	0
1853	ENSDARG00000104125	0.034061635	3	2	-0.308432601	6.382382112	3.85E-59	16.17394094	ttc6	943	5.39E-58
1854	ENSDARG00000104139	0.334195204	8	2	-1.420645795	6.952676015	0	158.4902785	atp1a3b	623	0
1855	ENSDARG00000104204	0.053888912	12	2	-1.85075017	3.248207288	1.98E-171	27.88592442	slc1a8a	9	4.66E-170
1856	ENSDARG00000104263	0.037830074	3	2	0.314707212	6.217634397	1.63E-74	18.22521979	CABZ01055365.1	48	2.55E-73
1857	ENSDARG00000104264	0.057815298	10	2	0.586798586	4.158009248	3.33E-166	27.45156884	XKR4	514	7.73E-165
1858	ENSDARG00000104267	0.144288847	11	1	-0.165606342	-4.603734536	0	68.4497907	postnb	815	0
1859	ENSDARG00000104277	0.120700251	5	2	-3.046764575	5.73180552	0	57.29140712	BX942846.1	452	0
1860	ENSDARG00000104279	0.034931588	9	1	3.055870332	-3.310062928	4.91E-62	16.57941132	appa	2327	7.03E-61
1861	ENSDARG00000104295	0.058082382	4	1	2.576065101	0.655840116	1.87E-167	27.55601098	arhgap21a	1253	4.38E-166
1862	ENSDARG00000104314	0.066037237	6	1	-3.627673112	-4.740507646	5.93E-216	31.34370167	nrg1	654	1.59E-214
1863	ENSDARG00000104431	0.141392371	4	1	1.816489615	-0.393521829	0	67.02892911	slc1a3a	1616	0
1864	ENSDARG00000104480	0.324486583	5	2	-2.584805928	5.345825391	0	153.8005075	hcn1	1338	0
1865	ENSDARG00000104530	0.034262135	2	1	0.405466594	-0.671344427	9.50E-60	16.2599275	znf609b	4481	1.34E-58
1866	ENSDARG00000104573	0.166504668	14	1	4.880821981	-2.399478955	0	78.92294516	slc12a2	2207	0
1867	ENSDARG00000104632	0.042312616	1	1	-2.926963769	-2.419513745	2.41E-90	20.12103525	RERG	247	4.16E-89
1868	ENSDARG00000104665	0.19587498	6	1	-3.79230424	-4.892360015	0	92.84142326	kirrel3l	1734	0
1869	ENSDARG00000104685	0.067876064	12	2	-1.856703005	3.215751844	3.17E-259	34.37323565	grk1b	12	9.41E-258
1870	ENSDARG00000104742	0.035463348	5	2	-2.21825882	6.362141805	3.08E-66	17.15110452	hnf4b	35	4.55E-65
1871	ENSDARG00000104773	0.037668743	13	1	2.29563836	-3.567877335	7.93E-72	17.88349859	junbb	1002	1.22E-70
1872	ENSDARG00000104786	0.065928141	4	1	1.40268866	-0.300791426	4.06E-215	31.28233016	nlgn3a	794	1.09E-213
1873	ENSDARG00000104791	0.229838564	5	2	-1.151666842	5.507791238	0	109.0644998	CABZ01077956.1	408	0
1874	ENSDARG00000104810	0.173129405	8	2	-1.237580143	7.139290052	0	82.06657703	akt3a	1666	0
1875	ENSDARG00000104815	0.290771661	16	1	3.97200159	-4.1727951	0	137.8360016	lmx1ba	1234	0
1876	ENSDARG00000104845	0.034547307	3	2	-0.370826803	6.250369268	9.93E-61	16.39770072	mipol1	2196	1.40E-59
1877	ENSDARG00000104992	0.058194661	11	1	0.004426562	-4.763436599	6.56E-175	28.1713535	epgn	97	1.57E-173
1878	ENSDARG00000105045	0.038983182	2	1	1.274156966	-1.189901931	1.06E-76	18.49861616	bmpr1ab	2548	1.68E-75
1879	ENSDARG00000105071	0.094945714	9	1	2.893170156	-1.723064406	0	45.01193917	nos1apa	2866	0
1880	ENSDARG00000105088	0.161695795	11	1	-0.069343798	-2.931308074	0	76.62963617	tenm4	5507	0
1881	ENSDARG00000105112	0.059027399	7	1	-1.154566012	-4.776871486	5.39E-173	28.01462785	ntn1a	742	1.28E-171
1882	ENSDARG00000105120	0.038472638	2	1	0.842276968	-0.150922341	8.82E-75	18.25874272	gab2	1862	1.38E-73
1883	ENSDARG00000105147	0.070988331	8	2	-0.704281293	7.034630971	1.50E-250	33.78756906	osbpl1a	176	4.35E-249
1884	ENSDARG00000105190	0.076628795	10	2	0.439809136	3.182846265	8.25E-291	36.42600395	rhbdl3	261	2.64E-289
1885	ENSDARG00000105296	0.098345418	3	2	-0.233462266	6.725433068	0	46.72330641	AP3B2	273	0
1886	ENSDARG00000105379	0.039813534	15	1	-0.414944432	1.045042234	8.39E-158	26.73856402	si:ch211-220f21.3	2	1.88E-156
1887	ENSDARG00000105389	0.40865881	14	1	5.113455572	-2.776127024	0	194.0290744	mmel1	294	0
1888	ENSDARG00000105391	0.200335293	5	2	-1.792473994	5.813132482	0	95.06633429	strc	403	0
1889	ENSDARG00000105441	0.094282954	17	3	-3.099209033	0.76089056	0	44.72967337	pcdh11	711	0
1890	ENSDARG00000105452	0.078792419	4	1	2.331486501	0.501690464	9.63E-306	37.35736027	plxna1a	3571	3.20E-304
1891	ENSDARG00000105492	0.054724698	3	2	0.238670627	6.132520394	2.90E-149	25.99388303	si:dkey-97l20.6	404	6.35E-148
1892	ENSDARG00000105590	0.071579097	1	1	-2.910096846	-2.065806432	9.30E-254	34.00530316	si:cabz01007794.1	307	2.74E-252
1893	ENSDARG00000105592	0.039358632	6	1	-4.007089816	-4.917735858	1.05E-78	18.74550071	CR936442.1	164	1.69E-77
1894	ENSDARG00000105641	0.037069662	1	1	-2.541042529	-2.54215507	9.85E-70	17.61266941	si:ch211-98n17.5	473	1.49E-68
1895	ENSDARG00000105670	0.105401158	14	1	5.408417501	-3.046682401	0	50.12179699	CT030129.1	204	0
1896	ENSDARG00000106473	0.050545685	8	2	-1.052649699	6.393107133	1.23E-128	24.10057067	CABZ01076968.1	112	2.53E-127
1897	ENSDARG00000107408	0.07704937	16	1	3.944343843	-4.293155236	7.67E-293	36.5541016	TCF4	950	2.47E-291
1898	ENSDARG00000108372	0.033307532	10	2	0.393984802	4.424211221	3.66E-57	15.89098171	LO017648.1	127	5.00E-56
1899	ENSDARG00000108515	0.035283211	16	1	4.019413509	-4.163817687	6.44E-64	16.83786368	CR388163.2	115	9.37E-63
1900	ENSDARG00000108649	0.048481323	16	1	4.01607398	-4.171255155	4.73E-118	23.069074	GALNT3	214	9.31E-117
1901	ENSDARG00000109215	0.033111554	4	1	1.976373233	-1.404559357	5.59E-56	15.71912472	FQ377603.1	1596	7.57E-55
1902	ENSDARG00000109337	0.044229303	9	1	2.198261299	-2.646120591	3.70E-98	20.99420425	nanos1	923	6.64E-97
1903	ENSDARG00000109783	0.05956559	4	1	2.089500703	-0.127404733	5.69E-176	28.25790136	igsf11	1287	1.37E-174
1904	ENSDARG00000109818	0.141559673	3	2	-0.164955221	6.233961301	0	67.27641846	SPATA48	223	0
1905	ENSDARG00000109820	0.250695939	2	1	1.907053031	-2.770698948	0	118.8086213	NPAS3	2380	0
1906	ENSDARG00000109937	0.042591935	5	2	-2.873638115	5.614656167	7.08E-92	20.29523045	CR356242.1	147	1.23E-90
1907	ENSDARG00000110020	0.038934932	2	1	1.289370813	-1.849196536	4.64E-77	18.54307206	zgc:56628	168	7.36E-76
1908	ENSDARG00000110032	0.096512954	4	1	2.120482363	0.820173578	0	45.77569435	SAMD5	965	0
1909	ENSDARG00000110496	0.102538582	5	2	-1.430260621	5.383726792	0	48.77873605	zgc:162989	169	0
1910	ENSDARG00000110729	0.124004773	5	2	-2.680959902	5.6966116	0	59.41436781	PCP4	61	0
1911	ENSDARG00000110878	0.054991369	6	1	-4.003031455	-4.905495448	7.81E-151	26.1323885	si:dkey-28k24.2	312	1.72E-149
1912	ENSDARG00000110940	0.03738845	3	2	-0.399710796	5.714843946	5.05E-71	17.77994775	ptprsa	287	7.69E-70
1913	ENSDARG00000110963	0.031867591	14	1	5.360667505	-3.076455874	5.71E-54	15.42321686	trib1	39	7.65E-53
1914	ENSDARG00000111054	0.027599854	2	1	0.7590243	-0.144476635	2.23E-58	16.06538241	si:dkey-58b18.2	3	3.10E-57
1915	ENSDARG00000111945	0.044321372	14	1	4.721696653	-2.278998656	1.25E-98	21.04561979	CABZ01069040.1	669	2.26E-97
1916	ENSDARG00000112337	0.081734001	3	2	0.43651753	6.904386716	0	38.94521589	mindy4b	129	0
1917	ENSDARG00000112637	0.041999441	8	2	-1.567146979	7.278672414	3.37E-89	19.98997575	ANOS1	209	5.73E-88
1918	ENSDARG00000112959	0.033298277	18	4	18.18638352	-3.437430186	9.22E-57	15.83295402	CABZ01072309.1	329	1.26E-55
1919	ENSDARG00000112977	0.067446879	4	1	1.305578389	-0.622634722	8.46E-225	31.98626826	CABZ01061591.1	2078	2.33E-223
1920	ENSDARG00000113150	0.0313534	3	2	0.635391333	6.796584802	3.82E-62	16.59443625	fthl31	6	5.49E-61
1921	ENSDARG00000113411	0.147566717	7	1	-2.230861626	-6.162823005	0	70.04619226	lrrc4ca	378	0
1922	ENSDARG00000113702	0.290587045	8	2	-1.031783066	6.796115117	0	137.7830334	RIMS2	805	0
1923	ENSDARG00000113761	0.031906618	3	2	0.119018413	5.324983792	3.74E-52	15.15083482	DYNC2H1	1206	4.94E-51
1924	ENSDARG00000113771	0.121820932	8	2	-1.601974807	7.610284047	0	57.87934082	GRIK2	268	0
1925	ENSDARG00000114408	0.338234963	14	1	5.04737977	-2.699717207	0	160.7276575	AL954137.2	214	0
1926	ENSDARG00000114472	0.029993142	13	1	1.385464706	-3.513555808	1.13E-67	17.34198104	ctxn3	5	1.69E-66
1927	ENSDARG00000114495	0.048587146	10	2	-0.060610108	4.451423841	6.68E-118	23.05415359	ATP8A1	1439	1.31E-116
1928	ENSDARG00000114760	0.049427495	16	1	3.651347913	-4.022665782	7.36E-124	23.64068027	asip2b	89	1.48E-122
1929	ENSDARG00000114825	0.034122022	2	1	1.91331295	-2.162130756	2.37E-59	16.20384673	SCARF2	842	3.31E-58
1930	ENSDARG00000114920	0.062344242	6	1	-4.079902373	-4.960604472	1.60E-192	29.57435076	TTC28	1304	4.03E-191
1931	ENSDARG00000115101	0.096468381	4	1	1.755731143	0.626722174	0	45.74401765	LHFPL6	1481	0
1932	ENSDARG00000115463	0.064978768	3	2	-0.017961643	5.358188348	1.86E-212	31.08606247	tomt	70	4.94E-211
1933	ENSDARG00000115956	0.039370314	11	1	0.057452567	-4.935314937	4.53E-79	18.79030084	CABZ01044281.1	149	7.31E-78
1934	ENSDARG00000116353	0.034743931	7	1	-2.040546618	-5.678382201	1.67E-61	16.50562608	lrp4	550	2.37E-60
1935	ENSDARG00000116457	0.13108386	1	1	-2.886377535	-1.651537044	0	62.29503315	zmp:0000001088	229	0
1936	ENSDARG00000116483	0.035106251	3	2	0.031410493	6.273698526	7.22E-64	16.83113357	FP102122.1	59	1.05E-62
1937	ENSDARG00000116575	0.048975043	3	2	0.182871901	6.822383599	3.59E-120	23.27934964	CR352265.3	276	7.11E-119
1938	ENSDARG00000116617	0.045082065	11	1	-0.176271103	-4.250211997	4.82E-102	21.4152164	spaca4l	593	8.82E-101
1939	ENSDARG00000116633	0.039706554	10	2	0.523582675	3.035407977	5.17E-158	26.75660336	BX649391.2	2	1.17E-156
1940	ENSDARG00000116871	0.038122988	15	1	0.037083187	0.576837378	1.83E-73	18.09230178	BX284638.2	2215	2.84E-72
1941	ENSDARG00000116937	0.032693437	2	1	0.467898868	-2.539148493	1.02E-54	15.53430632	BX927333.1	581	1.37E-53
1942	ENSDARG00000117008	0.120404137	1	1	-2.111986361	-2.930599494	0	57.16652141	CABZ01102201.1	342	0
1943	ENSDARG00000117126	0.039813381	10	2	0.419164755	3.588588433	1.45E-80	18.97213002	BX664603.1	146	2.36E-79
1944	ENSDARG00000117174	0.030358416	6	1	-2.873213492	-4.442122025	1.83E-71	17.83667329	CT583728.27	3	2.80E-70
1945	ENSDARG00000117179	0.151180912	16	1	3.706071414	-3.806548877	0	71.6567587	FP326649.1	2377	0
1946	ENSDARG00000117275	0.093757013	2	1	0.737493642	-2.442469044	0	44.44999924	BX537310.2	2853	0
1947	ENSDARG00000117377	0.105067386	5	2	-2.214870892	5.047028737	0	50.03196383	AL929216.1	144	0
1948	ENSDARG00000117434	0.050878052	9	1	3.253582038	-2.253328128	2.80E-129	24.16188612	CABZ01073166.1	468	5.78E-128
1949	ENSDARG00000117454	0.111365085	5	2	-2.073812447	4.945380883	0	53.22368658	CR792457.1	78	0
1950	ENSDARG00000117486	0.103295306	8	2	-0.74183359	7.371724324	0	49.27560717	CR925719.2	94	0
1951	ENSDARG00000117488	0.041100012	10	2	0.485651724	3.795741754	2.53E-86	19.65681583	CABZ01079853.1	77	4.23E-85
1952	ENSDARG00000117507	0.203902105	4	1	1.632880845	-0.658607302	0	96.63699349	FP236822.2	2215	0
1953	ENSDARG00000117538	0.107100028	2	1	0.442827978	-1.2316512	0	50.78845518	CABZ01075068.1	1133	0
1954	ENSDARG00000117547	0.119035074	16	1	3.965658225	-4.204953952	0	56.45227099	CABZ01086127.1	1043	0
1955	ENSDARG00000117549	0.081238085	4	1	2.536484041	0.723930078	0	38.55590125	FQ790211.1	524	0
1956	ENSDARG00000117622	0.088733764	4	1	2.750770368	-0.205355806	0	42.1459091	CR377229.1	326	0
1957	ENSDARG00000117645	0.154950031	6	1	-3.543060504	-5.046970649	0	73.43298942	CR384075.1	5025	0
1958	ENSDARG00000117660	0.04294651	10	2	0.659480341	4.174639421	3.07E-93	20.44885804	CU459145.1	192	5.38E-92
1959	ENSDARG00000117727	0.041529048	1	1	-2.925015412	-2.354485197	2.86E-87	19.76712452	BX510306.1	196	4.81E-86
1960	ENSDARG00000117747	0.038155601	2	1	0.296945501	-2.927416129	1.43E-73	18.10588351	CABZ01056843.1	3097	2.22E-72
1961	ENSDARG00000117753	0.031613036	2	1	1.441855707	-2.865274949	3.53E-84	19.40463385	FO907087.1	4	5.85E-83
