# Supplementary material for: Single-cell transcriptomic profiling of the zebrafish inner ear reveals molecularly distinct hair cell and supporting cell subtypes
Source: eLife. 2023 Jan 4;12:e82978. doi: 10.7554/eLife.82978 (PMC9851615; doi:10.7554/eLife.82978)
Supplement: Supplementary file 3. [file elife-82978-supp3.xlsx]

## Sheet: Sheet1
PAGA scores for Supplemental Figure S1A
	striolar HC	extrastriolar HC	lat line HC	ear HCP	lat line HCP	crista SC	macular SC	D/V lat line SC	other lat line SC	ear nonsensory	lat line nonsensory	ear progenitors	lat line progenitors	ear structural
striolar HC		1	1	0.0762817	0.25054	0.157965	0.202243	0	0.00565727	0.00885393	0.193263	0.0097913	0.00143581	0.00263967
extrastriolar HC	1		0.0352984	0.02696	0.235271	0	0.123935	0	0	0.00812783	0.377005	0	0	0
lat line HC	1	0.0352984		0.0282783	1	0	0.00188399	0.113053	0.00234981	0	0.0930447	0.000843141	0.00084487	0
ear HCP	0.0762817	0.02696	0.0282783		0.293735	0.331118	1	0.0116685	0.0533928	0.447114	0.100675	0.931339	0.0596892	0.127234
lat line HCP	0.25054	0.235271	1	0.293735		0.0264007	0.0194065	1	0.155907	0.0387427	0.62016	0.0112394	0.0747416	0.0112939
crista SC	0.157965	0	0	0.331118	0.0264007		0.391096	0.00377552	0.0130659	0.430149	0.134132	0.633431	0.0114836	0.612248
macular SC	0.202243	0.123935	0.00188399	1	0.0194065	0.391096		0.0106114	0.0105147	0.852921	0.0869977	0.241346	0.00767392	0.0265564
D/V lat line SC	0	0	0.113053	0.0116685	1	0.00377552	0.0106114		0.973033	0.00184684	0.920476	0.00840194	0.13251	0.00168241
other lat line SC	0.00565727	0	0.00234981	0.0533928	0.155907	0.0130659	0.0105147	0.973033		0.00497106	0.552874	0.0478288	1	0.0112565
ear nonsensory	0.00885393	0.00812783	0	0.447114	0.0387427	0.430149	0.852921	0.00184684	0.00497106		0.224957	0.881818	0.0037449	0.44939
lat line nonsensory	0.193263	0.377005	0.0930447	0.100675	0.62016	0.134132	0.0869977	0.920476	0.552874	0.224957		0.00741602	1	0.10588
ear progenitors	0.0097913	0	0.000843141	0.931339	0.0112394	0.633431	0.241346	0.00840194	0.0478288	0.881818	0.00741602		0.0342421	0.566106
lat line progenitors	0.00143581	0	0.00084487	0.0596892	0.0747416	0.0114836	0.00767392	0.13251	1	0.0037449	1	0.0342421		0.00762931
ear structural	0.00263967	0	0	0.127234	0.0112939	0.612248	0.0265564	0.00168241	0.0112565	0.44939	0.10588	0.566106	0.00762931
PAGA scores for Supplemental Figure S1C
	striolar HC	extrastriolar HC	lat line HC	ear HCP	lat line HCP	crista SC	macular SC	D/V lat line HC	other lat line SC
striolar HC		0.509336	0.893912	0.0443177	0.125749	0.0787	0.0559315	0.00135141	0.0047646
extrastriolar HC	0.509336		0.0509128	0.0384142	0.0781533	0.00558135	0.0569446	0.00158138	0.00202741
lat line HC	0.893912	0.0509128		0.0735865	0.429569	0.0842375	0.0699749	0.0238673	0.0100036
ear HCP	0.0443177	0.0384142	0.0735865		0.47419	0.833587	0.854399	0.0685693	0.133818
lat line HCP	0.125749	0.0781533	0.429569	0.47419		0.0401757	0.031034	1	0.167207
crista SC	0.0787	0.00558135	0.0842375	0.833587	0.0401757		0.418801	0.0221394	0.0202234
macular SC	0.0559315	0.0569446	0.0699749	0.854399	0.031034	0.418801		0.0164276	0.0235997
D/V lat line HC	0.00135141	0.00158138	0.0238673	0.0685693	1	0.0221394	0.0164276		0.694031
other lat line SC	0.0047646	0.00202741	0.0100036	0.133818	0.167207	0.0202234	0.0235997	0.694031
