# Supplementary material for: Single-cell transcriptomic profiling of the zebrafish inner ear reveals molecularly distinct hair cell and supporting cell subtypes
Source: eLife. 2023 Jan 4;12:e82978. doi: 10.7554/eLife.82978 (PMC9851615; doi:10.7554/eLife.82978)
Supplement: Supplementary file 4. [file elife-82978-supp4.xlsx]

## Sheet: seurat_clusters0
feature	group	avgExpr	logFC	statistic	auc	pval	padj	pct_in	pct_out
FP565432.1	seurat_clusters0	1.03491	0.935529	1019472	0.67586	9.19588e-142	1.37134e-137	38.968	3.8003
NC-002333.4	seurat_clusters0	4.72109	3.04724	1.20164e+06	0.796629	1.45973e-131	1.45122e-127	96.7972	32.8241
pard3bb	seurat_clusters0	1.73304	1.39136	1.10819e+06	0.734676	4.80606e-131	3.58352e-127	57.4733	14.0462
igsf3	seurat_clusters0	1.12008	1.00177	1.01741e+06	0.674492	6.3904e-126	3.17656e-122	39.1459	5.25335
BX571942.1	seurat_clusters0	1.33886	1.16795	1028212	0.681654	2.30629e-121	8.59813e-118	42.1708	6.55738
fgfr2	seurat_clusters0	0.972372	0.863626	1000588	0.66334	4.03853e-111	1.00374e-107	37.1886	5.58867
neo1a	seurat_clusters0	2.09155	1.48793	1138590	0.754829	3.52159e-109	8.07934e-106	67.0819	29.1729
fat1a	seurat_clusters0	1.14257	0.95923	1026745	0.680681	2.84538e-105	5.30397e-102	43.2384	8.94188
slit3	seurat_clusters0	0.801358	0.740705	953768	0.632301	6.19536e-104	9.23883e-101	29.0036	2.98063
wu:fi36a10	seurat_clusters0	1.32929	1.06443	1.0341e+06	0.68556	9.61584e-104	1.36568e-100	46.9751	9.68703
gli2a	seurat_clusters0	0.809828	0.727728	966058	0.640449	3.36998e-103	4.36998e-100	31.4947	3.8003
ZNF423	seurat_clusters0	0.943072	0.822025	983646	0.652108	3.59056e-103	4.46202e-100	35.2313	5.02981
ttn.2	seurat_clusters0	1.0159	0.869785	977356	0.647938	1.27203e-100	1.35494e-97	34.5196	4.769
lpp	seurat_clusters0	1.18623	0.979115	1.0266e+06	0.680582	6.52325e-100	6.4852e-97	43.7722	9.9851
col4a6	seurat_clusters0	1.04284	0.888958	998802	0.662157	8.63085e-100	8.30371e-97	38.2562	6.8927
robo1	seurat_clusters0	2.19511	1.51172	1.11261e+06	0.737604	2.2903e-95	1.84617e-92	64.7687	29.5082
slc4a11	seurat_clusters0	0.944441	0.834863	959965	0.636409	1.91104e-94	1.46146e-91	31.1388	4.24739
col5a1	seurat_clusters0	1.07619	0.897281	1005328	0.666483	3.30519e-92	2.34708e-89	40.3915	8.94188
CR936540.1	seurat_clusters0	0.860619	0.740793	953938	0.632413	8.78076e-91	5.81969e-88	30.7829	4.09836
sox6	seurat_clusters0	1.60801	1.20228	1054452	0.69905	1.70308e-86	9.9597e-84	53.0249	18.4426
zgc:110158	seurat_clusters0	1.13623	0.918524	1.01367e+06	0.672014	8.35216e-84	4.37023e-81	43.7722	11.997
krt4	seurat_clusters0	0.919959	0.773224	966345	0.640639	2.80309e-83	1.44142e-80	33.9858	6.1848
ttn.1	seurat_clusters0	0.947734	0.785743	954496	0.632784	5.39843e-81	2.55568e-78	32.0285	5.36513
efna2a	seurat_clusters0	1.04907	0.864189	982616	0.651426	1.15779e-80	5.31245e-78	37.1886	8.5693
CU928117.1	seurat_clusters0	0.666956	0.573641	924886	0.613154	2.9441e-76	1.18659e-73	26.3345	3.57675
arvcfb	seurat_clusters0	0.728729	0.624098	941270	0.624016	4.54696e-76	1.80817e-73	29.3594	4.99255
ncam1a	seurat_clusters0	1.96171	1.31134	1.06354e+06	0.705072	2.40821e-74	8.6536e-72	58.363	28.1669
srgap2	seurat_clusters0	1.00444	0.800458	987573	0.654712	2.59655e-74	9.21932e-72	39.5018	10.7303
col11a1a	seurat_clusters0	1.36344	1.04182	1.01422e+06	0.672375	1.91748e-72	6.57343e-70	46.0854	16.0209
p3h4	seurat_clusters0	0.640163	0.557661	920022	0.609929	2.4098e-72	8.1673e-70	25.4448	3.72578
negr1	seurat_clusters0	0.855556	0.710566	957343	0.634671	3.42103e-72	1.13369e-69	33.0961	7.30253
jarid2b	seurat_clusters0	1.36183	1.00522	1.0223e+06	0.677731	3.9621e-72	1.28445e-69	47.8648	17.9583
itga5	seurat_clusters0	0.603898	0.542653	901289	0.59751	2.85186e-71	9.0486e-69	21.8861	2.53353
pcdh7b	seurat_clusters0	2.72982	1.44679	1.09677e+06	0.727105	8.67019e-71	2.66586e-68	72.9537	51.1923
nhsl2	seurat_clusters0	0.602796	0.545296	906050	0.600666	3.72827e-70	1.11113e-67	22.7758	2.98063
tnfrsfa	seurat_clusters0	1.07517	0.826745	979227	0.649179	8.84856e-70	2.56222e-67	39.1459	10.6185
col27a1b	seurat_clusters0	0.69656	0.613175	922186	0.611364	2.35244e-69	6.68205e-67	25.9786	4.32191
foxp4	seurat_clusters0	2.02882	1.15804	1080270	0.716166	6.51535e-69	1.83321e-66	66.548	42.2131
ptprsa	seurat_clusters0	0.887672	0.71076	956360	0.63402	3.33596e-67	8.72763e-65	33.9858	8.19672
tns1b	seurat_clusters0	1.19504	0.893269	991206	0.657121	3.54233e-67	9.18695e-65	42.5267	13.4873
fndc3ba	seurat_clusters0	1.77472	1.13402	1.04659e+06	0.693838	5.43089e-66	1.32767e-63	57.8292	28.9121
ptprfb	seurat_clusters0	2.23523	1.20698	1076603	0.713735	1.99629e-65	4.80155e-63	68.1495	45.8271
col2a1a	seurat_clusters0	1.26386	0.980067	996260	0.660471	2.90634e-65	6.82532e-63	43.2384	15.462
notch1a	seurat_clusters0	0.669446	0.568085	918754	0.609089	7.83866e-62	1.68193e-59	26.3345	5.10432
tmem132e	seurat_clusters0	0.671191	0.565801	918728	0.609072	2.52807e-60	5.2308e-58	26.5125	5.36513
col14a1a	seurat_clusters0	0.787416	0.674647	916210	0.607402	5.44526e-60	1.09733e-57	25.9786	5.17884
pvrl2l	seurat_clusters0	0.688603	0.562326	922799	0.61177	2.30116e-59	4.54517e-57	27.758	5.92399
plxna3	seurat_clusters0	1.20105	0.869804	985466	0.653315	1.17737e-58	2.23663e-56	42.7046	16.1699
dock1	seurat_clusters0	1.10775	0.805998	973588	0.645441	1.88192e-57	3.34097e-55	40.3915	14.1207
ptprub	seurat_clusters0	1.76168	1.07726	1026194	0.680316	3.40061e-57	5.93119e-55	56.4057	29.3964
si:dkey-35m8.1	seurat_clusters0	0.730973	0.601497	911603	0.604348	4.88183e-56	8.13411e-54	25.8007	5.36513
coro1ca	seurat_clusters0	0.82586	0.638723	939100	0.622577	7.60928e-55	1.20716e-52	32.3843	9.09091
myo9aa	seurat_clusters0	0.752835	0.587744	928206	0.615354	8.45261e-55	1.33386e-52	29.8932	7.56334
rnd3a	seurat_clusters0	0.651693	0.52461	916007	0.607267	8.76171e-54	1.31979e-51	27.2242	6.29657
dag1	seurat_clusters0	0.90152	0.681297	955494	0.633445	3.52666e-53	5.1814e-51	36.6548	12.4814
boc	seurat_clusters0	0.781183	0.61057	934956	0.61983	4.05113e-53	5.92279e-51	31.6726	9.01639
celf2	seurat_clusters0	0.694118	0.566833	918660	0.609026	4.36877e-53	6.32517e-51	27.758	6.81818
bmpr1ab	seurat_clusters0	0.61381	0.502075	906271	0.600813	4.52321e-53	6.51714e-51	25.089	5.36513
cux1a	seurat_clusters0	1.73888	0.954198	1029472	0.682489	2.01651e-51	2.72138e-49	60.1423	39.5306
nxn	seurat_clusters0	0.8215	0.625419	934336	0.619419	3.01229e-51	3.97529e-49	32.2064	9.46349
tenm4	seurat_clusters0	1.55612	0.967258	997102	0.661029	5.79015e-49	6.96336e-47	51.4235	26.4531
pcdh19	seurat_clusters0	1.28916	0.858958	977644	0.648129	4.09292e-46	4.34417e-44	45.5516	22.4292
igf2bp1	seurat_clusters0	0.741769	0.581388	925578	0.613613	4.96677e-46	5.25298e-44	30.9609	9.94784
nrxn2a	seurat_clusters0	0.751864	0.597314	906809	0.60117	2.19249e-45	2.25486e-43	26.5125	7.26528
tcf7l1a	seurat_clusters0	1.17008	0.787404	966866	0.640984	1.06175e-44	1.04167e-42	43.0605	20.1565
bach2b	seurat_clusters0	1.06887	0.734438	955384	0.633372	1.413e-44	1.37722e-42	39.8577	16.9523
stm	seurat_clusters0	1.59385	0.919258	970108	0.643134	8.30856e-44	7.84186e-42	49.6441	20.9016
nova2	seurat_clusters0	1.24906	0.80661	973792	0.645576	9.07233e-44	8.50887e-42	45.7295	23.2861
ryk	seurat_clusters0	0.721476	0.549731	916123	0.607344	1.14115e-43	1.06358e-41	29.3594	9.20268
bcam	seurat_clusters0	0.694586	0.525152	908442	0.602252	3.82632e-43	3.48991e-41	27.758	8.12221
NC-002333.17	seurat_clusters0	1.8201	0.950576	974062	0.645755	6.25872e-43	5.63947e-41	55.694	22.2802
notch3	seurat_clusters0	0.693684	0.515767	912756	0.605112	4.09691e-42	3.52133e-40	29.1815	9.16542
ppap2d	seurat_clusters0	0.955262	0.655557	939412	0.622783	4.2339e-42	3.61822e-40	36.6548	14.456
plagl2	seurat_clusters0	0.654451	0.509909	899352	0.596226	1.01087e-40	8.28277e-39	25.8007	7.6006
zgc:92242	seurat_clusters0	0.719476	0.527468	912806	0.605145	2.81439e-40	2.25643e-38	29.7153	9.91058
tcf7l2	seurat_clusters0	0.804662	0.590652	917446	0.608221	1.34633e-39	1.01657e-37	30.7829	11.1773
srgap3	seurat_clusters0	0.918281	0.604115	934180	0.619315	2.15282e-39	1.60922e-37	37.0107	14.7168
tanc1b	seurat_clusters0	0.693244	0.518591	903222	0.598791	8.72068e-38	6.09672e-36	27.5801	9.31446
CT990561.1	seurat_clusters0	0.646422	0.506736	885258	0.586883	5.68192e-37	3.8427e-35	23.3096	6.70641
fbxw7	seurat_clusters0	1.8534	0.80548	993597	0.658706	1.80535e-36	1.20189e-34	61.032	48.9568
fat3a	seurat_clusters0	1.01608	0.668624	932759	0.618373	4.92377e-36	3.21338e-34	37.1886	16.9896
pcdh1b	seurat_clusters0	1.18963	0.760818	937141	0.621278	1.14425e-35	7.33047e-34	39.3238	18.5171
klf7b	seurat_clusters0	0.718367	0.51554	904490	0.599632	1.14535e-35	7.33047e-34	29.0036	10.4322
foxn3	seurat_clusters0	0.697242	0.505249	899470	0.596304	1.25176e-35	7.99439e-34	27.5801	9.50075
ptprua	seurat_clusters0	0.684204	0.533212	884041	0.586076	1.54364e-35	9.79556e-34	23.3096	7.00447
trps1	seurat_clusters0	0.80903	0.559152	911413	0.604222	2.05584e-35	1.29085e-33	31.1388	11.997
diaph2	seurat_clusters0	1.72214	0.776185	982956	0.651651	5.66487e-35	3.4693e-33	57.2954	43.5917
tcf7l1b	seurat_clusters0	1.04349	0.691202	932171	0.617983	6.42078e-35	3.90816e-33	37.5445	17.772
gse1	seurat_clusters0	1.05937	0.669029	940652	0.623606	1.06897e-34	6.41487e-33	40.3915	20.7899
spns2	seurat_clusters0	0.969722	0.670519	923302	0.612104	2.75288e-34	1.61942e-32	34.6975	15.7973
zfhx3	seurat_clusters0	1.6249	0.774033	978762	0.648871	7.94256e-34	4.57311e-32	57.2954	43.3681
plecb	seurat_clusters0	0.677216	0.508986	892252	0.591519	8.87069e-34	5.09766e-32	25.9786	9.05365
znrf3	seurat_clusters0	1.15281	0.683139	940866	0.623748	3.75392e-33	2.08105e-31	42.1708	22.5037
ror1	seurat_clusters0	0.836462	0.574912	902724	0.598461	3.96322e-33	2.19301e-31	29.7153	11.3636
prom1a	seurat_clusters0	1.10646	0.661234	933410	0.618804	4.42322e-33	2.42951e-31	40.5694	19.6349
kremen1	seurat_clusters0	1.59118	0.797988	957200	0.634576	1.53584e-31	7.71152e-30	53.0249	32.6006
dacha	seurat_clusters0	1.99007	0.810385	971648	0.644154	2.76176e-30	1.31791e-28	61.21	49.4411
arhgap35a	seurat_clusters0	0.982375	0.610723	924076	0.612617	5.5842e-30	2.60232e-28	37.9004	20.082
fgfrl1a	seurat_clusters0	0.999569	0.618632	914862	0.606509	1.00213e-29	4.61244e-28	35.9431	16.9896
mcf2l2	seurat_clusters0	1.00897	0.626906	917661	0.608364	1.08983e-29	5.00833e-28	36.4769	18.0328
nedd9	seurat_clusters0	0.930878	0.572105	913084	0.60533	1.53002e-29	6.98818e-28	35.5872	16.5797
tead1b	seurat_clusters0	1.17764	0.683004	937577	0.621567	2.58958e-29	1.16668e-27	43.9502	26.6766
gli3	seurat_clusters0	0.78435	0.515871	898056	0.595366	4.25495e-29	1.89976e-27	30.427	12.8167
fign	seurat_clusters0	0.957211	0.576217	915770	0.60711	1.03375e-28	4.51412e-27	36.8327	18.3681
cdh4	seurat_clusters0	1.48821	0.789102	938002	0.621849	2.12246e-28	9.10825e-27	46.4413	28.2787
snd1	seurat_clusters0	1.01982	0.604026	924078	0.612618	1.3044e-27	5.35126e-26	40.0356	23.1744
plekha7b	seurat_clusters0	0.942509	0.580696	910278	0.603469	1.90681e-27	7.72698e-26	35.2313	17.9955
NPAS3	seurat_clusters0	0.84777	0.554369	894072	0.592726	6.0053e-27	2.38493e-25	30.0712	13.4873
adgrl2a	seurat_clusters0	1.43392	0.730827	941116	0.623914	6.84961e-27	2.70582e-25	49.4662	33.6438
si:ch211-80h18.1	seurat_clusters0	0.705892	0.518879	865786	0.573973	9.35085e-27	3.67928e-25	21.5302	7.33979
insrb	seurat_clusters0	1.0431	0.595505	919502	0.609584	2.34212e-26	8.9556e-25	39.3238	23.0999
ank2b	seurat_clusters0	0.814426	0.512856	895124	0.593423	4.71873e-26	1.77697e-24	31.3167	14.4933
arhgef10la	seurat_clusters0	0.800972	0.516715	894345	0.592907	3.55548e-25	1.2838e-23	31.1388	15.2012
dip2ca	seurat_clusters0	1.42042	0.65823	937532	0.621537	5.80879e-25	2.06986e-23	49.2883	36.8852
galnt1	seurat_clusters0	1.63454	0.697873	945512	0.626827	8.30713e-25	2.92861e-23	55.516	44.7466
ctnna2	seurat_clusters0	0.92739	0.55738	895988	0.593995	3.64632e-24	1.24287e-22	32.9181	16.7288
eya2	seurat_clusters0	0.767927	0.525623	880786	0.583918	4.08601e-24	1.38799e-22	27.0463	12.2951
sema3fb	seurat_clusters0	1.0005	0.595543	900012	0.596664	4.12112e-24	1.39832e-22	34.6975	18.1818
ebf3a	seurat_clusters0	2.1833	0.76528	950446	0.630098	1.35684e-23	4.4568e-22	62.9893	60.7675
mgat4b	seurat_clusters0	2.1594	0.78101	946056	0.627189	4.64369e-23	1.48444e-21	61.3879	56.4456
nr4a3	seurat_clusters0	1.09056	0.619743	899246	0.596155	5.16451e-23	1.64564e-21	35.9431	19.2623
crim1	seurat_clusters0	0.994558	0.549049	905962	0.600608	1.13914e-22	3.53536e-21	38.0783	22.9508
fhod3b	seurat_clusters0	1.16329	0.602995	906308	0.600837	1.20696e-21	3.52918e-20	40.9253	24.8137
zfhx4	seurat_clusters0	0.981834	0.537128	903258	0.598815	6.34132e-21	1.76592e-19	39.1459	25
lgr4	seurat_clusters0	0.920534	0.517026	893750	0.592512	3.87322e-20	1.03884e-18	35.9431	21.7586
sema4c	seurat_clusters0	1.13841	0.565383	906688	0.60109	4.36545e-20	1.16562e-18	41.9929	29.0984
baz2ba	seurat_clusters0	1.31958	0.576504	918830	0.609139	6.18797e-20	1.63614e-18	48.9324	39.3443
si:ch73-22o12.1	seurat_clusters0	1.19508	0.578276	908682	0.602411	1.27161e-19	3.27228e-18	44.306	31.7809
FRMD5	seurat_clusters0	0.921427	0.50286	886731	0.587859	2.73782e-19	6.88495e-18	34.1637	20.0075
plxna1a	seurat_clusters0	1.14411	0.549906	901984	0.597971	2.83656e-19	7.12724e-18	41.637	28.1669
ptprfa	seurat_clusters0	0.955532	0.504706	884692	0.586507	1.22062e-17	2.71882e-16	35.4093	22.2802
tox2	seurat_clusters0	1.28178	0.546237	893372	0.592261	1.55978e-15	2.94433e-14	45.0178	34.9851
tenm3	seurat_clusters0	1.12779	0.502822	882958	0.585357	1.13636e-14	1.99131e-13	41.4591	29.62
ahr2	seurat_clusters0	1.27442	0.514204	891296	0.590886	1.58025e-14	2.72591e-13	46.0854	38.3383
mt-co1	seurat_clusters0	1.52784	0.532666	879726	0.583215	2.68107e-14	4.50495e-13	47.8648	27.0119
cadm4	seurat_clusters0	1.73904	0.646609	894002	0.59268	3.29504e-14	5.46881e-13	50.8897	43.5544

## Sheet: seurat_clusters1
feature	group	avgExpr	logFC	statistic	auc	pval	padj	pct_in	pct_out
BX942846.1	seurat_clusters1	1.23186	1.14897	1098944	0.746542	5.17047e-226	1.54209e-221	52.844	3.88745
ush1c	seurat_clusters1	2.89844	2.16941	1314531	0.892996	5.48384e-222	8.17778e-218	91.9266	35.1351
rtn4r	seurat_clusters1	2.17799	1.74992	1.22764e+06	0.833968	3.06662e-206	3.04873e-202	80	19.03
lrp2a	seurat_clusters1	2.22953	1.80715	1.20962e+06	0.821725	1.1674e-199	8.70444e-196	76.8807	17.5861
cadpsa	seurat_clusters1	1.45925	1.24893	1145796	0.77837	3.88099e-199	2.31501e-195	64.9541	9.51499
mybpc2a	seurat_clusters1	1.21434	1.10228	1.08537e+06	0.73732	5.48132e-194	2.72467e-190	52.2936	5.36838
otofa	seurat_clusters1	3.46057	2.35965	1272893	0.864711	2.18356e-188	9.30355e-185	93.7615	36.6161
atp2a3	seurat_clusters1	2.52147	1.84706	1241352	0.843284	7.45625e-183	2.77978e-179	86.055	29.2854
glra3	seurat_clusters1	1.01133	0.912374	1.06443e+06	0.723095	6.18266e-180	2.04886e-176	49.3578	5.10922
atp1a1b	seurat_clusters1	1.69424	1.41346	1140993	0.775107	2.1121e-176	6.29934e-173	64.9541	12.5509
shisa2a	seurat_clusters1	1.16016	0.998064	1.10163e+06	0.748367	1.17112e-172	3.17535e-169	57.6147	8.77453
capga	seurat_clusters1	1.28614	1.07152	1120894	0.761454	4.91073e-170	1.22052e-166	62.3853	11.033
skor2	seurat_clusters1	0.945163	0.846376	1.0499e+06	0.713222	1.41782e-169	3.2528e-166	47.7064	4.9241
slc4a8	seurat_clusters1	1.02766	0.87111	1069805	0.726747	1.07832e-151	2.2972e-148	53.578	8.36727
tbkbp1	seurat_clusters1	0.897952	0.779906	1.03616e+06	0.703889	6.07128e-151	1.20717e-147	46.9725	5.5535
si:ch73-138i16.1	seurat_clusters1	1.34791	1.07326	1115607	0.757862	1.73102e-150	3.22673e-147	64.9541	13.6246
klhl29	seurat_clusters1	1.65131	1.31383	1126691	0.765392	7.44325e-150	1.30585e-146	65.1376	15.883
cntn3b	seurat_clusters1	1.15465	0.979915	1.06557e+06	0.723874	2.39732e-149	3.97222e-146	52.6606	8.33025
strc	seurat_clusters1	2.97522	1.81519	1.22175e+06	0.829965	2.87939e-146	4.51988e-143	89.9083	44.9833
pex5la	seurat_clusters1	2.75284	1.81594	1191311	0.80929	1.32965e-140	1.98283e-137	85.1376	34.7279
CR356242.1	seurat_clusters1	1.03502	0.882608	1.03949e+06	0.706153	9.55846e-138	1.35753e-134	48.2569	7.44169
enox1	seurat_clusters1	0.865694	0.748663	1010474	0.686442	2.3488e-133	3.18422e-130	43.1193	5.44243
cabp1b	seurat_clusters1	2.65441	1.69344	1.17646e+06	0.799201	9.5005e-130	1.23197e-126	90.4587	35.2462
atp8a2	seurat_clusters1	2.57455	1.57662	1183159	0.803752	6.64479e-127	8.25753e-124	90.4587	41.6883
atp8b5a	seurat_clusters1	1.10308	0.873241	1043702	0.709015	1.77579e-116	2.11852e-113	52.844	11.144
micu3a	seurat_clusters1	1.57726	1.11708	1.11004e+06	0.754082	1.86151e-116	2.13537e-113	70.2752	22.7323
nrcama	seurat_clusters1	0.903735	0.730314	1.02465e+06	0.696072	2.15389e-113	2.37925e-110	48.6239	9.47797
ppp3ca	seurat_clusters1	0.750658	0.641361	976776	0.66355	1.68615e-108	1.79605e-105	38.3486	5.59052
fam149a	seurat_clusters1	1.56432	1.07388	1100186	0.747386	3.87813e-108	3.98846e-105	71.5596	23.732
cacna1ia	seurat_clusters1	1.26042	0.950378	1.05037e+06	0.713542	3.73847e-106	3.71666e-103	56.3303	14.5872
dlg1	seurat_clusters1	2.70479	1.38175	1157620	0.786403	5.05337e-105	4.86183e-102	90.0917	55.498
cnbd1	seurat_clusters1	1.50998	1.03879	1.08669e+06	0.738218	6.64678e-104	6.195e-101	68.9908	22.288
tmc1	seurat_clusters1	2.6483	1.6648	1.11841e+06	0.759767	2.20015e-103	1.98847e-100	88.4404	30.6183
ckbb	seurat_clusters1	2.8311	1.53711	1144379	0.777408	6.36999e-102	5.50981e-99	87.7064	48.8708
aplp1	seurat_clusters1	1.80285	1.14257	1112547	0.755783	6.46583e-102	5.50981e-99	78.1651	31.2847
zmat4a	seurat_clusters1	2.27319	1.37216	1.12551e+06	0.764586	1.09391e-101	9.06274e-99	82.2018	37.1344
tnc	seurat_clusters1	2.14372	1.26817	1.12551e+06	0.76459	4.24799e-100	3.42423e-97	81.6514	39.0596
prkag2a	seurat_clusters1	1.51565	1.02178	1083880	0.736309	2.13912e-99	1.67893e-96	69.3578	23.843
prickle2b	seurat_clusters1	2.35792	1.41246	1.11949e+06	0.760503	3.05264e-98	2.33449e-95	82.9358	37.4306
cntn3a.2	seurat_clusters1	0.599493	0.523412	936950	0.636495	3.83143e-97	2.85681e-94	31.1927	3.8134
brinp1	seurat_clusters1	1.11763	0.838062	1.02901e+06	0.699031	1.3956e-96	1.01521e-93	52.844	13.8467
slc9a5	seurat_clusters1	0.729488	0.631514	953358	0.647642	2.85201e-94	1.97816e-91	34.4954	5.47945
pros1	seurat_clusters1	0.614478	0.512705	957814	0.650669	5.80046e-94	3.93179e-91	36.1468	5.77564
tnr	seurat_clusters1	1.12964	0.824043	1029324	0.699248	1.11832e-93	7.41197e-91	54.4954	14.5872
hsd3b7	seurat_clusters1	1.49155	0.968605	1082076	0.735084	1.10764e-92	7.18161e-90	70.4587	27.4343
palld	seurat_clusters1	1.95155	1.16088	1.10329e+06	0.749492	7.00606e-92	4.44586e-89	79.8165	36.1348
inhbb	seurat_clusters1	1.25548	0.861906	1.05441e+06	0.716291	9.39875e-92	5.83995e-89	62.9358	20.1777
clic5a	seurat_clusters1	1.21814	0.864619	1.04798e+06	0.711922	4.99296e-91	3.03908e-88	59.2661	19.4372
sema6dl	seurat_clusters1	1.04383	0.76312	1019857	0.692816	3.87483e-90	2.31133e-87	52.6606	14.1059
BX005003.1	seurat_clusters1	2.21387	1.18126	1.11493e+06	0.7574	2.965e-89	1.73394e-86	87.5229	46.4272
cox4i1l	seurat_clusters1	1.19879	0.854585	1039425	0.70611	2.37488e-88	1.36213e-85	57.2477	18.7708
sox13	seurat_clusters1	1.36983	0.928584	1.05681e+06	0.717918	2.81736e-88	1.58543e-85	63.6697	22.7323
mef2cb	seurat_clusters1	0.923491	0.692823	1.0057e+06	0.6832	3.62082e-88	1.99983e-85	48.8073	12.5139
myo3b	seurat_clusters1	2.5963	1.33099	1114683	0.757234	4.58996e-88	2.48901e-85	88.8073	48.3154
ncam1b	seurat_clusters1	2.75425	1.39434	1.11534e+06	0.757678	1.45226e-87	7.73458e-85	89.3578	49.9445
mpp7a	seurat_clusters1	1.12403	0.783054	1.02878e+06	0.698878	1.53734e-86	8.04406e-84	57.2477	16.7716
cacnb3b	seurat_clusters1	1.77323	1.0682	1.08122e+06	0.734499	2.0365e-85	1.04722e-82	76.3303	32.2103
dpydb	seurat_clusters1	0.681661	0.561945	950324	0.645581	6.07609e-85	3.07151e-82	35.4128	6.44206
cyp4t8	seurat_clusters1	0.680532	0.5482	959746	0.651981	6.44385e-85	3.20313e-82	37.7982	7.36764
slc2a3a	seurat_clusters1	1.05308	0.743738	1024449	0.695936	1.00922e-82	4.85483e-80	55.5963	17.7342
pax2a	seurat_clusters1	2.20229	1.15817	1.0936e+06	0.74291	1.37238e-80	6.3955e-78	86.789	44.7612
cdh4	seurat_clusters1	1.76018	1.11099	1045715	0.710382	2.81346e-79	1.29095e-76	66.2385	24.3984
CU469539.1	seurat_clusters1	0.905435	0.671953	981520	0.666773	2.3365e-77	1.04009e-74	44.9541	11.8475
adgrb1a	seurat_clusters1	0.732645	0.572206	949878	0.645278	8.61294e-77	3.77766e-74	37.0642	7.73787
plxna4	seurat_clusters1	2.45164	1.19893	1088530	0.739468	1.63655e-75	6.97286e-73	90.8257	50.6479
osbpl2b	seurat_clusters1	1.45617	0.886485	1047510	0.711602	3.58964e-75	1.5079e-72	68.6239	28.0637
grid1a	seurat_clusters1	1.23114	0.814579	1011597	0.687205	2.08109e-73	8.62061e-71	56.6972	18.7708
fthl27	seurat_clusters1	1.50102	0.948803	1035620	0.703525	3.49861e-73	1.4294e-70	62.5688	26.0644
ivns1abpa	seurat_clusters1	1.30307	0.899153	1014834	0.689404	8.58784e-73	3.46125e-70	55.0459	20.4739
myo15b	seurat_clusters1	1.43331	0.86019	1038966	0.705798	3.04591e-71	1.19532e-68	68.8073	27.9896
pde1a	seurat_clusters1	1.28253	0.825844	1007369	0.684333	8.65341e-70	3.35179e-67	56.5138	19.6964
prdm16	seurat_clusters1	1.41873	0.889136	1.01578e+06	0.690046	1.40907e-69	5.31968e-67	60.9174	21.7697
syt11a	seurat_clusters1	0.867292	0.608358	980044	0.665771	7.49459e-69	2.79408e-66	47.3394	14.365
spock3	seurat_clusters1	1.26708	0.793824	1.02349e+06	0.695281	1.08208e-68	3.98434e-66	61.4679	25.2499
gapdhs	seurat_clusters1	2.75875	1.0888	1077713	0.73212	5.3279e-68	1.93786e-65	89.7248	62.9026
skilb	seurat_clusters1	0.996933	0.690375	982888	0.667702	1.68055e-67	5.89676e-65	48.4404	15.5128
ccdc105	seurat_clusters1	0.879929	0.619465	972156	0.660412	5.30356e-67	1.83929e-64	45.5046	13.6246
frmpd3	seurat_clusters1	0.943848	0.652915	974634	0.662096	8.66238e-67	2.9696e-64	46.789	14.0689
ctnnd2a	seurat_clusters1	1.69916	0.951752	1040236	0.70666	6.89468e-66	2.33675e-63	71.9266	34.2836
plch2a	seurat_clusters1	1.37175	0.843622	1007506	0.684426	9.99139e-66	3.34824e-63	60.367	21.8067
ush2a	seurat_clusters1	2.26078	1.11545	1055372	0.716943	1.18987e-65	3.94311e-63	77.7982	44.2799
adcy8	seurat_clusters1	0.701632	0.528552	941261	0.639424	1.44197e-65	4.72601e-63	37.0642	9.21881
baiap2l2a	seurat_clusters1	1.02695	0.664453	998612	0.678384	2.93932e-65	9.52884e-63	55.0459	20.1407
ndrg3b	seurat_clusters1	2.4507	0.994899	1069201	0.726337	3.67756e-65	1.16684e-62	88.8073	60.8293
cyp4v7	seurat_clusters1	0.851451	0.599483	968025	0.657606	3.7463e-65	1.17614e-62	44.9541	13.5505
sorbs1	seurat_clusters1	1.91239	0.967649	1.05355e+06	0.715707	7.65298e-65	2.35309e-62	78.1651	44.391
gltpa	seurat_clusters1	0.870837	0.597011	970067	0.658993	1.22039e-64	3.7141e-62	46.2385	14.0318
CR847968.1	seurat_clusters1	1.17457	0.771059	985308	0.669346	1.48117e-64	4.4622e-62	51.5596	17.1418
laptm4b	seurat_clusters1	2.45944	1.10358	1061182	0.72089	4.57308e-64	1.35042e-61	88.0734	52.7582
hcn1	seurat_clusters1	2.18048	1.09063	1049757	0.713128	2.68838e-63	7.78456e-61	81.8349	43.7616
grm4	seurat_clusters1	0.924709	0.629671	965675	0.656009	1.85765e-62	5.32734e-60	45.6881	14.0689
tmeff2b	seurat_clusters1	1.17408	0.728644	998338	0.678198	4.00404e-62	1.13734e-59	57.2477	21.9178
cdc14ab	seurat_clusters1	1.87988	0.930449	1.0396e+06	0.706231	8.13564e-60	2.2261e-57	79.4495	43.2062
TENM2	seurat_clusters1	2.7506	1.43128	1028245	0.698515	1.03607e-58	2.80915e-56	74.3119	37.5046
svila	seurat_clusters1	1.80889	0.888097	1.03492e+06	0.703052	3.3893e-58	9.10682e-56	79.8165	42.7619
rtn4rl2b	seurat_clusters1	1.27951	0.762712	1.00387e+06	0.681955	3.57681e-58	9.52486e-56	60.1835	27.2862
prkd2	seurat_clusters1	1.52847	0.826166	1021296	0.693794	9.50519e-58	2.50878e-55	70.0917	35.3203
triob	seurat_clusters1	1.6475	0.886407	1.01962e+06	0.692656	1.15936e-57	3.03314e-55	71.3761	34.1355
ptprnb	seurat_clusters1	0.882582	0.574768	962710	0.653995	2.87495e-57	7.39185e-55	47.156	15.7349
lipf	seurat_clusters1	0.949424	0.615079	976855	0.663604	3.8136e-57	9.72143e-55	50.4587	19.5483
tmem269	seurat_clusters1	1.47697	0.787483	1015841	0.690088	8.23831e-57	2.08227e-54	71.0092	33.2099
fam102ba	seurat_clusters1	0.718934	0.512615	935716	0.635657	1.7459e-56	4.37574e-54	38.1651	11.07
galnt9	seurat_clusters1	1.36192	0.781696	994644	0.675689	3.4024e-56	8.45638e-54	60.9174	25.1018
agrn	seurat_clusters1	3.09507	0.987736	1049495	0.71295	3.98066e-56	9.81182e-54	96.1468	75.0463
mctp1a	seurat_clusters1	1.96381	0.940904	1.02607e+06	0.697037	1.62002e-54	3.96041e-52	80.9174	43.5394
si:dkey-205h13.1	seurat_clusters1	2.34474	1.02412	1.03363e+06	0.702171	1.70386e-54	4.13151e-52	83.1193	51.6475
cox8b	seurat_clusters1	1.39287	0.767238	1.00176e+06	0.680524	2.5729e-54	6.18844e-52	65.1376	29.9519
si:dkey-103g5.4	seurat_clusters1	1.52911	0.801829	1007319	0.684299	4.30067e-53	1.02614e-50	69.5413	34.2096
pcbp3	seurat_clusters1	0.704071	0.50599	923890	0.627624	7.7401e-53	1.8177e-50	35.7798	10.4036
fam110b	seurat_clusters1	1.15533	0.685529	980110	0.665816	7.85783e-53	1.83094e-50	56.1468	23.2877
ptprga	seurat_clusters1	2.27158	1.02918	1.02359e+06	0.695349	2.12876e-52	4.80986e-50	81.8349	46.9086
calm1b	seurat_clusters1	2.18171	0.95175	1025765	0.69683	2.17507e-52	4.87754e-50	80.9174	49.6853
rem1	seurat_clusters1	1.06995	0.661145	969352	0.658507	2.69981e-52	6.00908e-50	51.5596	20.5109
TMEM8B	seurat_clusters1	1.22311	0.72755	979446	0.665364	4.45913e-52	9.85138e-50	55.2294	23.9541
pkig	seurat_clusters1	1.88253	0.867547	1021763	0.694111	6.20224e-52	1.36016e-49	78.5321	47.0196
CU571064.1	seurat_clusters1	0.868941	0.564672	950296	0.645562	7.12806e-52	1.55178e-49	44.9541	15.846
tspan13b	seurat_clusters1	1.88024	0.874379	1.01865e+06	0.691995	8.18483e-52	1.76893e-49	77.9817	44.2429
dlg2	seurat_clusters1	1.53754	0.815592	995139	0.676025	1.11523e-51	2.39293e-49	66.2385	29.8038
shtn3	seurat_clusters1	1.39702	0.764548	994774	0.675777	2.19188e-51	4.57152e-49	63.8532	30.5072
kif1aa	seurat_clusters1	2.71688	0.961596	1032960	0.701718	2.615e-51	5.41613e-49	93.945	66.0496
foxo1a	seurat_clusters1	1.14157	0.670097	977792	0.66424	5.21621e-51	1.07292e-48	55.7798	24.2503
marc1	seurat_clusters1	0.788299	0.517911	939030	0.637908	1.10085e-49	2.16005e-47	42.2018	14.4761
osbpl1a	seurat_clusters1	1.77464	0.828513	1010649	0.686561	1.44004e-49	2.80713e-47	77.0642	42.873
tagapa	seurat_clusters1	1.11003	0.643178	975116	0.662423	4.22796e-49	8.08327e-47	56.1468	25.1018
nrxn3a	seurat_clusters1	2.6455	1.09218	1021254	0.693765	4.47849e-49	8.5077e-47	88.9908	55.7201
nrg3b	seurat_clusters1	1.49228	0.790586	989886	0.672457	4.98976e-49	9.41897e-47	65.1376	31.0255
cntfr	seurat_clusters1	1.19211	0.672634	966739	0.656732	8.56072e-49	1.59577e-46	55.0459	22.0289
prkcab	seurat_clusters1	1.03998	0.626603	959693	0.651945	9.91659e-49	1.83703e-46	50.2752	20.2888
lpin2	seurat_clusters1	0.784117	0.50705	944265	0.641465	6.27676e-48	1.14849e-45	44.0367	16.8456
hsp90aa1.2	seurat_clusters1	3.40778	1.17778	1.02268e+06	0.694736	6.5511e-48	1.19138e-45	90.2752	67.0863
anxa6	seurat_clusters1	0.73442	0.508447	927036	0.629761	6.95558e-48	1.25727e-45	38.3486	12.9952
sesn1	seurat_clusters1	1.31178	0.697339	987044	0.670525	9.48255e-48	1.69351e-45	63.3028	31.766
iqsec1b	seurat_clusters1	2.79784	1.0179	1020558	0.693293	2.00285e-47	3.55565e-45	94.8624	64.2725
rassf2a	seurat_clusters1	0.776487	0.508203	933778	0.634341	2.05328e-47	3.62361e-45	41.2844	14.5502
uhrf1bp1l	seurat_clusters1	1.14128	0.626905	978204	0.664521	2.8835e-47	5.05885e-45	59.633	28.2488
sema6e	seurat_clusters1	1.54118	0.805748	980507	0.666085	4.34314e-46	7.48753e-44	62.9358	30.6553
jag2b	seurat_clusters1	1.92161	0.870102	998644	0.678406	6.86143e-45	1.1369e-42	77.9817	44.5391
sbf1	seurat_clusters1	1.22396	0.654269	974186	0.661791	1.32035e-44	2.1637e-42	60.7339	29.8038
si:ch211-195b15.8	seurat_clusters1	1.06172	0.607613	960632	0.652584	2.33383e-44	3.76252e-42	53.0275	24.6946
abca2	seurat_clusters1	1.20811	0.641352	970412	0.659227	5.07228e-44	8.13337e-42	60.1835	28.6931
pcdh15b	seurat_clusters1	1.88522	0.864799	992532	0.674254	5.38098e-44	8.58223e-42	74.6789	41.7623
frmd3	seurat_clusters1	1.16711	0.643243	962060	0.653553	9.87288e-44	1.56627e-41	55.7798	25.6201
wdr95	seurat_clusters1	1.32512	0.67249	977488	0.664034	1.13514e-43	1.7913e-41	63.6697	32.8767
sptlc2b	seurat_clusters1	1.43502	0.698586	984226	0.668612	1.23238e-43	1.93451e-41	66.789	37.1344
lrba	seurat_clusters1	2.7446	0.830248	1.00997e+06	0.6861	1.83408e-43	2.84903e-41	93.578	72.3066
slc17a8	seurat_clusters1	2.0768	0.927405	991425	0.673502	8.19054e-43	1.25919e-40	80.5505	43.1322
kcnma1a	seurat_clusters1	2.67732	0.99859	1003442	0.681665	1.25096e-42	1.91333e-40	91.1927	60.2369
BX294434.1	seurat_clusters1	1.03922	0.577394	953340	0.64763	3.71553e-42	5.59675e-40	53.211	23.9911
eps8b	seurat_clusters1	0.954877	0.550368	944850	0.641862	3.8915e-42	5.83237e-40	49.3578	21.0663
slit2	seurat_clusters1	1.05713	0.579182	950726	0.645854	8.85526e-42	1.30747e-39	53.211	23.2506
znf385a	seurat_clusters1	1.65563	0.767601	980496	0.666077	1.53371e-41	2.25335e-39	71.5596	38.2821
si:dkey-26i13.8	seurat_clusters1	1.06317	0.579903	950954	0.646009	3.69461e-41	5.40156e-39	53.3945	24.1022
ptprq	seurat_clusters1	2.12884	0.873689	991617	0.673632	4.04926e-41	5.86258e-39	81.8349	49.6853
dnajc5b	seurat_clusters1	1.47017	0.681628	979037	0.665086	4.42023e-41	6.33614e-39	68.9908	38.7634
frya	seurat_clusters1	1.88779	0.789284	988508	0.67152	1.1274e-40	1.5567e-38	76.3303	48.5376
camta1a	seurat_clusters1	1.00607	0.576203	936406	0.636126	1.69468e-40	2.32921e-38	47.5229	19.7334
cd164l2	seurat_clusters1	1.45185	0.671339	977153	0.663806	2.03139e-40	2.7665e-38	68.6239	38.9856
agbl4.1	seurat_clusters1	1.4652	0.72591	965954	0.656199	2.30077e-40	3.11911e-38	62.0183	31.9882
kcnab2a	seurat_clusters1	2.26225	0.906261	989060	0.671895	6.50344e-40	8.7767e-38	84.5872	51.2033
cnsta	seurat_clusters1	0.996849	0.553321	943846	0.64118	1.87589e-39	2.50889e-37	51.0092	23.4358
AP3B2	seurat_clusters1	1.41524	0.644374	974154	0.661769	3.99767e-39	5.27569e-37	68.8073	39.9111
pcsk5a	seurat_clusters1	1.97228	0.790225	985061	0.669179	7.40031e-39	9.68044e-37	83.3028	50.722
erich3	seurat_clusters1	1.03152	0.54484	950381	0.64562	1.11008e-38	1.44577e-36	54.6789	27.1011
sema7a	seurat_clusters1	0.960148	0.531906	942460	0.640239	1.55749e-38	2.01092e-36	50.8257	24.0281
stard15	seurat_clusters1	1.4992	0.724867	961240	0.652997	2.75588e-38	3.54285e-36	63.1193	32.8397
xirp2b	seurat_clusters1	1.22996	0.62349	950206	0.6455	1.62593e-37	2.05481e-35	57.4312	28.3969
gpx2	seurat_clusters1	1.52311	0.694305	965894	0.656158	1.85949e-37	2.34006e-35	68.6239	37.3565
ppp1r15a	seurat_clusters1	1.24898	0.618188	953609	0.647812	2.29627e-37	2.87757e-35	59.4495	30.3591
CABZ01080568.1	seurat_clusters1	1.56662	0.74944	956596	0.649842	3.00419e-37	3.74895e-35	62.3853	31.9882
atp6ap2	seurat_clusters1	1.06146	0.544197	950290	0.645558	4.10977e-37	5.08606e-35	55.9633	29.4706
ccser2b	seurat_clusters1	0.882884	0.515755	923366	0.627268	5.54434e-37	6.83306e-35	43.6697	18.993
ERC1	seurat_clusters1	1.36965	0.645463	961159	0.652941	8.13325e-37	9.98247e-35	63.6697	36.1348
foxj1a	seurat_clusters1	1.28186	0.653827	947324	0.643543	1.4042e-36	1.69556e-34	56.3303	28.582
hk2	seurat_clusters1	1.00853	0.543757	936590	0.636251	1.80493e-36	2.16193e-34	50.6422	24.0652
cyth1a.1	seurat_clusters1	1.00124	0.538159	933758	0.634327	2.81835e-36	3.34889e-34	50.0917	23.0655
emb	seurat_clusters1	1.47869	0.647218	963810	0.654742	6.54033e-36	7.7101e-34	70.2752	39.726
tmc5	seurat_clusters1	1.52092	0.662974	961993	0.653508	7.09254e-36	8.32815e-34	69.9083	38.2081
si:ch211-132b12.7	seurat_clusters1	0.98574	0.520968	936743	0.636355	8.98093e-36	1.05042e-33	51.7431	24.9537
pdcd4b	seurat_clusters1	1.76852	0.762138	965101	0.655619	9.90889e-36	1.15442e-33	70.4587	41.5772
dnm2a	seurat_clusters1	1.58721	0.674909	966022	0.656245	1.50294e-35	1.73741e-33	72.6606	42.7619
cplx2	seurat_clusters1	1.13619	0.560869	947165	0.643435	1.60776e-35	1.8514e-33	57.9817	30.174
myo15aa	seurat_clusters1	1.84939	0.748803	970541	0.659315	1.63164e-35	1.87168e-33	78.8991	47.1307
eno1a	seurat_clusters1	1.59134	0.69565	961980	0.653499	4.48412e-35	5.08513e-33	70.4587	40.6516
ccnl1a	seurat_clusters1	1.31212	0.615271	954886	0.64868	6.2899e-35	7.10592e-33	62.3853	36.2829
baiap2l2b	seurat_clusters1	1.42217	0.622627	959308	0.651684	7.41657e-35	8.33664e-33	67.7064	39.3188
ARHGEF25	seurat_clusters1	1.02166	0.539933	931048	0.632486	1.06593e-34	1.19068e-32	50.2752	23.9541
bag3	seurat_clusters1	1.16373	0.633648	925951	0.629024	8.91527e-34	9.70431e-32	47.8899	23.2506
xylt1	seurat_clusters1	1.4667	0.663848	949311	0.644893	1.13635e-33	1.22796e-31	63.8532	34.8389
galnt2	seurat_clusters1	0.970198	0.506141	923037	0.627044	4.50003e-33	4.72582e-31	48.6239	22.6953
fhod1	seurat_clusters1	1.05973	0.527352	931593	0.632856	1.99968e-32	2.07085e-30	53.578	27.4343
arl6ip1	seurat_clusters1	1.21589	0.54753	944144	0.641382	5.0501e-32	5.17592e-30	60.7339	35.8016
tafa3b	seurat_clusters1	1.0036	0.508595	924004	0.627701	6.25242e-32	6.38625e-30	50.8257	24.5465
dock3	seurat_clusters1	1.02431	0.526408	921722	0.626151	6.49971e-32	6.61617e-30	48.6239	23.806
hsp70l	seurat_clusters1	2.8101	1.02447	961436	0.653129	1.05449e-31	1.06973e-29	81.4679	54.0541
per3	seurat_clusters1	1.51833	0.606094	952724	0.647211	2.12806e-31	2.14424e-29	71.0092	44.6131
mtmr11	seurat_clusters1	1.13244	0.523369	933784	0.634345	3.94268e-31	3.89372e-29	57.9817	30.7294
pvalb8	seurat_clusters1	1.33873	0.636499	928920	0.631041	9.47313e-31	9.17325e-29	54.3119	29.0263
cry2	seurat_clusters1	1.06137	0.523417	927978	0.630401	1.04814e-30	1.01168e-28	53.0275	28.7671
zgc:162989	seurat_clusters1	1.1376	0.541651	931570	0.632841	1.60506e-30	1.52943e-28	55.7798	31.0626
adgrv1	seurat_clusters1	1.46727	0.607095	941388	0.639511	3.15216e-30	2.95639e-28	67.5229	37.6157
rsrp1	seurat_clusters1	2.58009	0.625363	960914	0.652775	8.5364e-30	7.83379e-28	89.5413	74.4539
pcdh17	seurat_clusters1	1.60194	0.672754	937888	0.637133	1.11064e-29	1.00991e-27	66.9725	36.2829
tns2a	seurat_clusters1	1.03576	0.512278	916556	0.622641	1.21684e-29	1.10311e-27	49.5413	24.6946
tanc2a	seurat_clusters1	1.90601	0.670317	953032	0.647421	1.25679e-29	1.13587e-27	80.367	53.3506
fosb	seurat_clusters1	2.15462	0.781744	950214	0.645506	1.80827e-29	1.61957e-27	74.1284	50.6849
fut8a	seurat_clusters1	2.17701	0.731127	953872	0.647991	3.56119e-29	3.14238e-27	84.9541	58.1266
b4galt2	seurat_clusters1	1.56147	0.63635	938434	0.637504	7.22414e-29	6.31848e-27	68.0734	39.5409
sgip1a	seurat_clusters1	1.99096	0.693938	950845	0.645935	7.41091e-29	6.46288e-27	82.2018	54.6464
lrfn5a	seurat_clusters1	1.3808	0.598985	929910	0.631713	8.19847e-29	7.11182e-27	60.7339	33.321
hsph1	seurat_clusters1	1.01656	0.533626	902750	0.613263	1.16973e-28	1.00539e-26	42.9358	20.5109
ptprub	seurat_clusters1	1.36506	0.593826	922334	0.626566	2.14222e-28	1.82027e-26	57.7982	29.2854
rbm24a	seurat_clusters1	2.82001	0.873629	952798	0.647262	2.97334e-28	2.48403e-26	92.4771	64.6057
casz1	seurat_clusters1	1.12879	0.505916	922808	0.626888	3.78232e-28	3.12487e-26	57.2477	30.3591
hsp70.3	seurat_clusters1	1.96619	0.72854	943077	0.640658	4.1399e-28	3.41084e-26	73.945	47.7971
fcho2	seurat_clusters1	1.62297	0.598882	941444	0.639548	1.67871e-27	1.34953e-25	73.7615	49.0189
dnajb1b	seurat_clusters1	1.89463	0.689536	939200	0.638024	3.448e-27	2.74231e-25	72.4771	47.7231
rnasekb	seurat_clusters1	1.23798	0.529119	927070	0.629784	3.68105e-27	2.91988e-25	61.2844	35.9867
furina	seurat_clusters1	1.3257	0.577038	925792	0.628916	4.2148e-27	3.33439e-25	59.0826	35.4683
dachc	seurat_clusters1	1.21558	0.527701	922140	0.626435	7.38785e-27	5.81379e-25	58.5321	33.2099
aldocb	seurat_clusters1	1.53957	0.580866	934878	0.635088	9.76092e-27	7.62092e-25	70.6422	44.502
hsp70.2	seurat_clusters1	2.32135	0.913785	932142	0.63323	1.06545e-26	8.27528e-25	69.9083	41.3921
zbtb20	seurat_clusters1	1.59097	0.618466	932713	0.633617	1.25855e-26	9.72439e-25	68.4404	42.7249
arfip1	seurat_clusters1	1.30184	0.526013	928498	0.630753	1.62865e-26	1.2487e-24	64.4037	39.2077
cltca	seurat_clusters1	1.36053	0.543318	929743	0.6316	2.50022e-26	1.88782e-24	65.6881	41.1329
atp2b1a	seurat_clusters1	2.55006	0.74431	943846	0.64118	4.35013e-26	3.21942e-24	89.9083	65.3462
CABZ01077956.1	seurat_clusters1	1.46222	0.582912	926688	0.629525	4.47393e-26	3.30285e-24	66.2385	38.7264
tjap1	seurat_clusters1	1.6933	0.605795	935140	0.635266	8.15173e-26	5.97359e-24	76.8807	49.241
mtus1a	seurat_clusters1	1.31889	0.521264	924604	0.628109	1.81725e-25	1.31873e-23	64.7706	39.3558
FP236822.2	seurat_clusters1	1.18756	0.511146	912625	0.619971	2.91995e-25	2.10356e-23	56.3303	30.7664
itpr1b	seurat_clusters1	1.13828	0.511748	909737	0.618009	2.99308e-25	2.15105e-23	52.6606	29.3595
atp1a3b	seurat_clusters1	2.5516	0.816858	937751	0.63704	3.47684e-25	2.48674e-23	87.156	58.4598
myo6b	seurat_clusters1	2.52448	0.797052	938637	0.637642	3.96816e-25	2.82459e-23	90.0917	61.3106
clta	seurat_clusters1	1.37074	0.541022	922066	0.626384	9.35571e-25	6.56551e-23	63.4862	39.9482
jun	seurat_clusters1	2.22817	0.671425	932737	0.633633	3.36773e-24	2.29846e-22	80.367	57.7934
espn	seurat_clusters1	1.85003	0.632979	928469	0.630734	6.74419e-24	4.5303e-22	78.1651	51.5735
plch1	seurat_clusters1	1.4043	0.542113	919186	0.624428	8.76426e-24	5.83469e-22	66.2385	40.6516
arnt2	seurat_clusters1	1.44595	0.533846	920013	0.62499	2.58295e-23	1.6857e-21	68.4404	43.7986
dachb	seurat_clusters1	1.35089	0.514219	914546	0.621276	3.157e-23	2.0469e-21	64.5872	38.2821
aff2	seurat_clusters1	1.31221	0.504257	904160	0.61422	3.77978e-22	2.32437e-20	60.367	33.0989
jdp2b	seurat_clusters1	1.88483	0.637163	917740	0.623446	4.70324e-22	2.8863e-20	71.0092	48.1673
man1a1	seurat_clusters1	1.98431	0.625673	921750	0.62617	7.49409e-22	4.55216e-20	81.8349	56.2014
igsf21a	seurat_clusters1	1.78324	0.598427	915064	0.621628	1.10345e-21	6.63519e-20	75.0459	45.6498
nrxn3b	seurat_clusters1	3.14467	0.943611	924194	0.62783	1.21836e-21	7.29671e-20	91.1927	65.9015
atp1b2b	seurat_clusters1	2.17989	0.693691	918504	0.623965	2.66529e-21	1.56174e-19	82.0183	54.3873
magi3b	seurat_clusters1	1.40849	0.517844	906342	0.615703	3.72776e-21	2.1715e-19	63.8532	39.0966
dedd1	seurat_clusters1	1.86351	0.526074	912694	0.620018	8.96221e-20	4.77318e-18	79.0826	58.8301
asap1b	seurat_clusters1	1.66987	0.522457	908481	0.617156	1.78783e-19	9.30575e-18	76.8807	52.1659
nptna	seurat_clusters1	2.05543	0.613351	909144	0.617606	3.69411e-19	1.88337e-17	82.7523	56.4976
ddx5	seurat_clusters1	1.85348	0.502235	909276	0.617695	4.54342e-19	2.29285e-17	78.7156	59.0152
dnah5	seurat_clusters1	2.02237	0.635476	906158	0.615577	8.65348e-19	4.2449e-17	82.0183	53.5357
ndufa4l	seurat_clusters1	1.79704	0.542171	904236	0.614272	1.33742e-18	6.48594e-17	74.6789	52.6472
hivep2a	seurat_clusters1	1.83393	0.552894	902866	0.613342	2.60269e-18	1.23804e-16	74.4954	52.8323
stat3	seurat_clusters1	1.85094	0.56375	900658	0.611842	5.49713e-18	2.56576e-16	74.8624	51.4254
hsp70.1	seurat_clusters1	2.0032	0.621252	899221	0.610865	6.64949e-18	3.07952e-16	73.211	49.5742
rapgef2	seurat_clusters1	1.6906	0.501742	900471	0.611714	9.6349e-18	4.42775e-16	75.7798	53.6838
auts2a	seurat_clusters1	2.45468	0.614031	902397	0.613023	2.8995e-17	1.30434e-15	86.422	66.7531
znf536	seurat_clusters1	2.10129	0.573253	897156	0.609462	6.81509e-17	3.00236e-15	80.1835	55.6461
cacna1da	seurat_clusters1	1.63142	0.519613	891742	0.605785	8.36591e-17	3.66931e-15	71.9266	46.094
nfixb	seurat_clusters1	2.15708	0.617936	894343	0.607551	1.23887e-16	5.35497e-15	72.6606	53.3136
shank3a	seurat_clusters1	2.52115	0.603139	879672	0.597585	2.76066e-13	9.40991e-12	86.2385	65.7164
fosab	seurat_clusters1	2.9023	0.544988	877172	0.595886	9.96865e-13	3.2458e-11	85.8716	72.3436
CR383676.2	seurat_clusters1	5.12173	0.64394	836660	0.568366	4.3224e-07	7.43459e-06	90.8257	81.8586
zgc:158463	seurat_clusters1	4.17677	0.715169	835846	0.567813	4.44713e-07	7.61836e-06	84.9541	71.2329
CT027638.1	seurat_clusters1	3.30612	0.513835	810284	0.550448	0.000171766	0.00182635	85.5046	70.7146

## Sheet: seurat_clusters2
feature	group	avgExpr	logFC	statistic	auc	pval	padj	pct_in	pct_out
klhl30	seurat_clusters2	1.59141	1.28811	965110	0.787742	4.03019e-152	1.202e-147	70.4128	15.6228
dld	seurat_clusters2	0.855335	0.774021	854068	0.697108	1.40156e-149	2.09008e-145	43.578	4.23488
espnla	seurat_clusters2	1.98027	1.55977	963906	0.786759	2.38719e-137	2.37327e-133	71.3303	19.2171
espnlb	seurat_clusters2	0.948299	0.822961	861268	0.702985	1.32669e-124	9.89212e-121	47.0183	7.18861
ncs1a	seurat_clusters2	0.65131	0.573352	809046	0.660359	4.07751e-108	2.43223e-104	36.4679	4.37722
atoh1a	seurat_clusters2	1.26244	0.982647	897476	0.732537	2.74683e-106	1.3654e-102	59.1743	15.3025
baiap3	seurat_clusters2	0.736953	0.666966	796876	0.650426	3.96673e-105	1.69011e-101	33.4862	3.80783
RAPH1	seurat_clusters2	0.789524	0.68966	811285	0.662187	2.61073e-104	9.73311e-101	37.156	4.94662
stk10	seurat_clusters2	0.744843	0.633625	824944	0.673336	4.71257e-103	1.56169e-99	40.8257	6.26335
rapgefl1	seurat_clusters2	0.931049	0.788076	830171	0.677602	3.43316e-99	1.02394e-95	42.2018	7.36655
crocc2	seurat_clusters2	0.807184	0.707258	802353	0.654897	3.98309e-99	1.07996e-95	35.5505	4.7331
ppdpfa	seurat_clusters2	0.676019	0.578331	813821	0.664257	4.69413e-97	1.16669e-93	38.5321	5.97865
mllt3	seurat_clusters2	1.66861	1.17649	919602	0.750598	1.56286e-94	3.32946e-91	70.1835	24.6619
gpr156	seurat_clusters2	1.32926	0.956334	905827	0.739354	2.30596e-94	4.58502e-91	66.055	20.9253
pcdh15a	seurat_clusters2	1.87981	1.32397	904448	0.738228	1.99024e-91	3.70993e-88	67.2018	21.7794
srrm4	seurat_clusters2	1.88685	1.22274	922340	0.752832	9.17466e-87	1.60961e-83	77.2936	30.0356
tuba1a	seurat_clusters2	1.64678	1.16749	877463	0.716203	3.45669e-75	5.72755e-72	60.5505	23.0961
otofb	seurat_clusters2	3.09788	1.26628	913788	0.745852	5.69441e-64	7.71981e-61	89.6789	62.0285
rbm24a	seurat_clusters2	3.14707	1.21755	912412	0.744729	1.08086e-62	1.28947e-59	92.2018	65.7295
pcdh7a	seurat_clusters2	1.28327	0.80607	849442	0.693332	1.54767e-60	1.70961e-57	61.2385	22.9537
marcksl1b	seurat_clusters2	0.736475	0.558327	785076	0.640794	1.40104e-59	1.40456e-56	37.156	9.11032
arhgef10lb	seurat_clusters2	0.714325	0.548149	779412	0.636172	4.0942e-57	3.93901e-54	35.7798	8.93238
gse1a	seurat_clusters2	0.744524	0.562541	776823	0.634058	2.71008e-54	2.52588e-51	35.7798	9.28826
s100t	seurat_clusters2	2.30885	1.31358	857758	0.70012	2.38936e-52	1.92602e-49	68.1193	35.4448
lhfpl5a	seurat_clusters2	1.17984	0.755583	829278	0.676873	3.76556e-51	2.87969e-48	54.3578	23.8434
si:dkey-40c11.2	seurat_clusters2	0.785845	0.525621	794812	0.648741	1.03317e-49	7.5157e-47	44.2661	14.3416
tmc2a	seurat_clusters2	2.07846	1.08904	849002	0.692972	3.11298e-48	2.15918e-45	72.2477	35.8363
sh2d4bb	seurat_clusters2	1.06015	0.638476	813521	0.664012	7.14852e-47	4.53627e-44	54.3578	21.21
nfia	seurat_clusters2	2.43907	0.983874	867830	0.708341	7.5356e-47	4.68228e-44	86.9266	59.8221
kitb	seurat_clusters2	0.852771	0.569495	796788	0.650354	7.73626e-47	4.70886e-44	45.4128	16.5125
slc8a2b	seurat_clusters2	0.966046	0.677036	785438	0.641091	1.47369e-46	8.61819e-44	40.5963	13.9502
si:dkey-19b23.13	seurat_clusters2	0.913052	0.578666	805644	0.657583	6.39741e-46	3.60005e-43	50	19.6085
rplp2l	seurat_clusters2	2.04546	1.07339	845815	0.690371	2.69968e-45	1.49108e-42	68.578	39.9644
rims2a	seurat_clusters2	1.0668	0.661871	808361	0.6598	6.93633e-45	3.69421e-42	51.6055	21.3523
gipc3	seurat_clusters2	1.41203	0.753905	836418	0.682701	8.17459e-45	4.27732e-42	65.1376	34.2349
zdhhc16b	seurat_clusters2	1.75455	0.869336	835555	0.681997	3.05618e-42	1.51918e-39	67.4312	38.4698
dll4	seurat_clusters2	0.869319	0.536965	795733	0.649493	3.93144e-42	1.92222e-39	48.6239	19.2527
tox	seurat_clusters2	1.23613	0.670752	819014	0.668495	3.99946e-42	1.92394e-39	61.9266	28.1495
rpl5b	seurat_clusters2	1.05144	0.623879	801964	0.654579	1.47911e-41	7.0023e-39	51.8349	21.8861
si:ch211-222l21.1	seurat_clusters2	0.862585	0.588588	771663	0.629847	1.51368e-41	7.05398e-39	38.7615	13.0961
rpl7a	seurat_clusters2	2.05894	0.975633	841139	0.686554	1.95272e-41	8.96e-39	71.5596	45.4093
syne1b	seurat_clusters2	1.97983	0.877814	844365	0.689188	3.36312e-41	1.51977e-38	75	49.6797
rab2a	seurat_clusters2	1.37028	0.695385	828448	0.676196	7.63423e-41	3.3484e-38	67.2018	35.8719
ankrd24	seurat_clusters2	1.37872	0.69742	827087	0.675085	1.05835e-40	4.57466e-38	68.578	34.911
rps5	seurat_clusters2	1.82379	0.934048	830088	0.677535	1.99041e-40	8.245e-38	65.5963	38.3986
myo6b	seurat_clusters2	2.70051	0.969473	846990	0.691331	2.16414e-39	8.60607e-37	89.4495	62.5267
igsf21a	seurat_clusters2	2.14053	0.987939	835420	0.681886	6.21441e-39	2.37621e-36	71.3303	47.3665
uba52	seurat_clusters2	1.96749	0.863872	835254	0.681751	8.22824e-39	3.06759e-36	72.4771	47.4377
si:ch211-216b21.2	seurat_clusters2	1.28799	0.748684	800920	0.653726	8.17693e-39	3.06759e-36	52.7523	24.4128
fam107b	seurat_clusters2	0.956312	0.547072	795240	0.64909	1.27336e-38	4.63147e-36	52.2936	21.9929
triobpa	seurat_clusters2	0.859565	0.516412	788373	0.643486	2.09386e-38	7.52404e-36	47.7064	19.9288
rpl23	seurat_clusters2	2.10273	0.974313	829240	0.676842	1.57398e-37	5.21598e-35	69.9541	45.2313
rps8a	seurat_clusters2	1.91787	0.910459	826422	0.674542	1.78049e-37	5.8355e-35	68.8073	42.4911
rpl34	seurat_clusters2	1.95357	0.876471	829612	0.677146	2.51181e-37	8.05534e-35	72.7064	45.9786
rps27a	seurat_clusters2	1.92238	0.911393	824640	0.673087	6.80678e-37	2.11471e-34	68.578	42.4911
rps11	seurat_clusters2	2.0538	0.860213	828746	0.676439	4.25141e-36	1.28079e-33	72.9358	49.8221
scg3	seurat_clusters2	1.39084	0.691019	813470	0.66397	4.31857e-36	1.28801e-33	65.367	34.9822
rps14	seurat_clusters2	1.92178	0.881204	823585	0.672226	4.61213e-36	1.36195e-33	69.9541	43.879
hs6st1a	seurat_clusters2	1.39426	0.781925	797060	0.650576	6.75208e-36	1.91791e-33	53.211	26.3345
rps6	seurat_clusters2	1.56585	0.809473	810776	0.661771	1.28493e-35	3.61539e-33	62.156	34.4484
calm2a	seurat_clusters2	1.07648	0.673338	785838	0.641416	1.93995e-35	5.40737e-33	46.789	22.2064
rpl35	seurat_clusters2	1.83074	0.875539	816540	0.666476	2.75532e-35	7.60901e-33	67.2018	39.4662
rps4x	seurat_clusters2	1.79074	0.850474	816579	0.666508	4.0618e-35	1.11141e-32	66.9725	40.0356
hcn5	seurat_clusters2	1.15593	0.695013	780638	0.637173	5.44559e-35	1.4765e-32	45.4128	20.5694
rpl17	seurat_clusters2	1.90552	0.88238	819427	0.668833	5.78225e-35	1.55365e-32	68.3486	43.274
rplp1	seurat_clusters2	2.64389	0.999248	830036	0.677492	1.16721e-34	3.08071e-32	75	60.2135
rpsa	seurat_clusters2	1.95388	0.892286	818616	0.668171	1.83162e-34	4.75027e-32	68.8073	44.0569
rpl31	seurat_clusters2	1.89996	0.812965	820598	0.669789	3.51937e-34	8.97138e-32	71.5596	47.1886
rpl35a	seurat_clusters2	1.80731	0.851115	813010	0.663595	5.85578e-34	1.46763e-31	66.055	40.1779
rps10	seurat_clusters2	1.82073	0.833261	815266	0.665437	7.31888e-34	1.80401e-31	67.4312	42.6335
rps3a	seurat_clusters2	1.73735	0.831067	811118	0.662051	8.49027e-34	2.07559e-31	65.5963	38.8968
prdx5	seurat_clusters2	0.956641	0.550344	785101	0.640815	1.12201e-33	2.72065e-31	49.5413	23.7011
rps25	seurat_clusters2	1.94257	0.842771	817698	0.667421	1.47548e-33	3.54889e-31	69.4954	46.3345
rpl23a	seurat_clusters2	1.41926	0.710602	801902	0.654529	1.89873e-33	4.53036e-31	60.0917	32.8826
hsp90ab1	seurat_clusters2	2.56849	0.895883	826900	0.674933	2.74835e-33	6.4543e-31	81.6514	62.9537
rpl11	seurat_clusters2	1.89073	0.887915	812256	0.66298	2.89921e-33	6.75538e-31	68.1193	41.3167
rps18	seurat_clusters2	1.66377	0.78741	809320	0.660583	5.97107e-33	1.3699e-30	64.6789	39.8577
rps13	seurat_clusters2	1.77433	0.81715	808477	0.659895	2.42365e-32	5.47615e-30	66.055	40.7473
ppp1r14d	seurat_clusters2	1.19293	0.584557	795440	0.649254	5.55599e-32	1.22746e-29	60.7798	31.2456
cox6b1	seurat_clusters2	0.877032	0.529357	771078	0.629369	5.54581e-32	1.22746e-29	44.2661	19.9288
pdzd7a	seurat_clusters2	1.07064	0.575993	783631	0.639615	7.32222e-32	1.60577e-29	52.0642	25.2313
eml5	seurat_clusters2	1.3341	0.670103	797406	0.650859	7.74676e-32	1.68647e-29	60.0917	33.1673
rps3	seurat_clusters2	1.62182	0.757376	805170	0.657196	8.64958e-32	1.85593e-29	63.5321	39.573
cacna2d2a	seurat_clusters2	1.65014	0.776353	804857	0.65694	1.11156e-31	2.36803e-29	63.3028	39.6441
rps12	seurat_clusters2	1.75118	0.832281	803407	0.655757	1.55874e-31	3.29713e-29	63.7615	38.6121
rps15a	seurat_clusters2	1.82584	0.862968	804223	0.656423	1.62228e-31	3.40736e-29	64.9083	39.2883
rpl10a	seurat_clusters2	1.74546	0.812171	804834	0.656922	1.96484e-31	4.098e-29	64.4495	40.2491
rps16	seurat_clusters2	1.74729	0.799352	804984	0.657044	2.42666e-31	5.02606e-29	65.367	40.5694
rps7	seurat_clusters2	1.89982	0.877772	805517	0.657479	3.45103e-31	7.09842e-29	66.5138	41.4947
tubb4b	seurat_clusters2	1.05898	0.65046	771999	0.630121	4.00515e-31	8.1261e-29	45.1835	21.2811
rps29	seurat_clusters2	2.28955	0.919704	813748	0.664197	4.45671e-31	8.92089e-29	74.5413	51.8505
rps27.2	seurat_clusters2	1.4833	0.676461	800856	0.653675	8.71794e-31	1.71061e-28	62.844	38.6121
rpl28	seurat_clusters2	1.82993	0.812592	804544	0.656684	8.95621e-31	1.74588e-28	67.6606	41.7438
eef1b2	seurat_clusters2	1.41617	0.695486	795146	0.649014	9.18819e-31	1.77947e-28	59.4037	34.1281
rps19	seurat_clusters2	2.00592	0.884555	807066	0.658743	9.57566e-31	1.84254e-28	69.0367	44.6263
ccdc88c	seurat_clusters2	1.67268	0.687227	808990	0.660314	1.52225e-30	2.91033e-28	73.1651	47.4733
rpl14	seurat_clusters2	1.93515	0.739517	810606	0.661633	2.29015e-30	4.35056e-28	73.1651	50.8897
rpl36	seurat_clusters2	1.96157	0.836926	806218	0.658052	3.49463e-30	6.59667e-28	70.4128	45.7651
rpl29	seurat_clusters2	1.70275	0.785321	798686	0.651904	4.71644e-30	8.83585e-28	63.9908	38.6477
rpl27	seurat_clusters2	1.67575	0.775854	798928	0.652101	6.8628e-30	1.24807e-27	63.5321	39.5018
rpl21	seurat_clusters2	1.87188	0.833157	802862	0.655312	8.52711e-30	1.54134e-27	65.8257	43.879
rpl24	seurat_clusters2	1.66404	0.758952	798035	0.651372	1.00207e-29	1.78963e-27	64.6789	38.968
rplp0	seurat_clusters2	1.98415	0.834452	804526	0.656671	1.97187e-29	3.45948e-27	69.7248	47.0819
rpl32	seurat_clusters2	2.02523	0.842592	804192	0.656398	3.9529e-29	6.85437e-27	69.2661	48.1851
rps2	seurat_clusters2	2.00192	0.858724	801882	0.654512	4.74736e-29	8.18439e-27	67.4312	45.6228
rpl7	seurat_clusters2	1.73917	0.795021	796546	0.650156	6.23107e-29	1.06195e-26	64.9083	40.1423
rpl15	seurat_clusters2	1.60999	0.761931	793070	0.647319	7.75827e-29	1.31472e-26	60.5505	37.6157
rps26l	seurat_clusters2	1.65279	0.764004	793441	0.647622	1.40303e-28	2.35087e-26	61.2385	38.7189
eef1a1l1	seurat_clusters2	2.06035	0.869306	798942	0.652112	2.68903e-28	4.43095e-26	69.2661	44.911
rpl22l1	seurat_clusters2	0.973077	0.53275	768015	0.626869	2.82461e-28	4.62879e-26	46.3303	23.1673
rps21	seurat_clusters2	1.7822	0.792978	794480	0.64847	5.25466e-28	8.42583e-26	65.1376	41.3167
rps28	seurat_clusters2	1.82687	0.815189	793812	0.647926	5.49676e-28	8.7669e-26	64.9083	40.6762
rpl39	seurat_clusters2	2.12731	0.886594	799500	0.652568	8.30067e-28	1.30299e-25	70.4128	47.9715
hk1	seurat_clusters2	0.954753	0.502399	771940	0.630072	8.84133e-28	1.38059e-25	50	25.7295
rpl18	seurat_clusters2	1.78266	0.767753	794480	0.64847	1.1294e-27	1.73631e-25	66.2844	42.4911
s100s	seurat_clusters2	1.86014	0.839631	782586	0.638763	1.34965e-27	2.06428e-25	59.4037	32.1708
atp2b1a	seurat_clusters2	2.58676	0.757835	806473	0.658259	3.2968e-27	4.99122e-25	88.3028	66.548
rpl13	seurat_clusters2	1.76224	0.759112	791148	0.645751	5.91804e-27	8.82528e-25	64.9083	41.7438
rps24	seurat_clusters2	1.89062	0.782846	793414	0.647601	1.30273e-26	1.92346e-24	66.9725	45.9075
rps26	seurat_clusters2	1.40253	0.674738	778884	0.63574	1.87931e-26	2.70775e-24	56.1927	32.7402
rps15	seurat_clusters2	1.95548	0.759788	795019	0.64891	2.44919e-26	3.47844e-24	69.4954	49.4662
hsd17b7	seurat_clusters2	1.34613	0.575083	786296	0.64179	2.53951e-26	3.58962e-24	65.1376	38.7544
rpl36a	seurat_clusters2	2.03739	0.793221	794570	0.648543	4.05841e-26	5.62987e-24	69.9541	50
rpl13a	seurat_clusters2	1.70023	0.716205	788930	0.643941	5.0489e-26	6.93933e-24	64.2202	43.2028
rack1	seurat_clusters2	1.45239	0.660516	781196	0.637627	5.11191e-26	6.96176e-24	59.1743	35.6228
lrrc73	seurat_clusters2	1.04275	0.501947	769439	0.628031	7.98957e-26	1.07823e-23	53.211	27.6157
rpl3	seurat_clusters2	1.66416	0.692087	788241	0.643378	8.85706e-26	1.18458e-23	65.1376	43.3096
rpl18a	seurat_clusters2	1.68035	0.756636	782354	0.638573	2.64168e-25	3.45562e-23	60.3211	39.1459
rpl12	seurat_clusters2	1.69641	0.714553	784785	0.640557	2.96533e-25	3.86205e-23	64.2202	41.5302
RIMS2	seurat_clusters2	1.27333	0.640501	768454	0.627228	4.40466e-25	5.71169e-23	48.6239	29.3594
naca	seurat_clusters2	1.40963	0.632803	777666	0.634747	4.52056e-25	5.83662e-23	59.4037	35.3737
cacna1da	seurat_clusters2	1.76362	0.652171	788876	0.643896	5.03531e-25	6.41786e-23	67.2018	47.8292
rpl4	seurat_clusters2	1.1795	0.556233	771410	0.62964	5.44629e-25	6.85383e-23	54.3578	30.9609
rpl30	seurat_clusters2	1.542	0.672135	779364	0.636133	8.12976e-25	1.01452e-22	60.7798	37.758
rps9	seurat_clusters2	1.68699	0.739596	781676	0.63802	8.95317e-25	1.11262e-22	61.9266	40.2847
twf2b	seurat_clusters2	1.4843	0.619103	781296	0.63771	1.75995e-24	2.16902e-22	64.9083	40.6406
faua	seurat_clusters2	1.56439	0.706946	776394	0.633708	3.19837e-24	3.87769e-22	58.2569	37.2954
adgrv1	seurat_clusters2	1.54406	0.672246	779056	0.635881	3.26576e-24	3.94337e-22	60.7798	39.8221
rpl19	seurat_clusters2	1.91023	0.74854	785350	0.641019	3.81685e-24	4.5535e-22	67.8899	47.4377
cdh23	seurat_clusters2	1.37241	0.616049	772488	0.63052	6.39274e-24	7.44779e-22	55.5046	34.9466
rps23	seurat_clusters2	1.64017	0.697683	779036	0.635865	7.40693e-24	8.59578e-22	61.9266	41.1744
atp5mc3b	seurat_clusters2	1.28382	0.588093	768636	0.627376	1.52232e-23	1.74628e-21	55.5046	32.669
rpl5a	seurat_clusters2	0.997687	0.502446	754600	0.615919	3.11359e-23	3.50426e-21	46.3303	24.4484
rpl6	seurat_clusters2	1.81711	0.645018	782785	0.638925	5.27293e-23	5.84628e-21	70.1835	50.2847
si:ch211-1e14.1	seurat_clusters2	1.23713	0.576363	765166	0.624544	6.63033e-23	7.2186e-21	52.0642	32.1708
rpl10	seurat_clusters2	1.60615	0.681804	773312	0.631192	9.61544e-23	1.03158e-20	61.4679	39.4306
tox2	seurat_clusters2	1.2845	0.524881	766714	0.625808	1.15829e-22	1.23379e-20	60.3211	33.0605
rpl9	seurat_clusters2	1.13948	0.576337	752170	0.613937	1.75025e-22	1.85111e-20	46.1009	24.5196
dock9b	seurat_clusters2	1.76182	0.624325	779846	0.636526	2.94273e-22	3.06878e-20	70.1835	50.3915
slc25a5	seurat_clusters2	2.55243	0.680327	786184	0.641699	3.35858e-22	3.47811e-20	79.8165	66.6192
foxp4	seurat_clusters2	1.56481	0.570109	773154	0.631063	9.07419e-22	9.0271e-20	72.0183	42.4555
rpl8	seurat_clusters2	1.66312	0.696231	770114	0.628582	9.75431e-22	9.66519e-20	60.3211	40.427
ybx1	seurat_clusters2	1.38167	0.566141	765357	0.6247	1.52869e-21	1.48512e-19	59.4037	36.0142
rpl38	seurat_clusters2	1.73782	0.686657	771706	0.629882	1.70491e-21	1.6456e-19	64.2202	43.1673
spsb4a	seurat_clusters2	1.7022	0.592801	776384	0.6337	2.26618e-21	2.15938e-19	76.1468	49.7865
ptmab	seurat_clusters2	1.622	0.777224	764116	0.623687	2.68085e-21	2.54638e-19	55.2752	36.3345
eef1g	seurat_clusters2	1.27288	0.584908	756951	0.617838	3.9818e-21	3.74628e-19	51.8349	30.7117
ANKFN1	seurat_clusters2	1.45684	0.581901	767749	0.626652	6.19445e-21	5.75544e-19	61.4679	41.2811
serbp1a	seurat_clusters2	1.18108	0.508407	758456	0.619067	7.43682e-21	6.86697e-19	54.5872	32.5267
krt5	seurat_clusters2	1.15328	0.506851	755986	0.617051	1.25849e-20	1.14434e-18	51.6055	31.5302
cox4i1	seurat_clusters2	1.31989	0.508902	765548	0.624855	1.38105e-20	1.24066e-18	63.0734	40
rpl22	seurat_clusters2	1.39399	0.587682	759654	0.620045	3.52458e-20	3.0737e-18	56.1927	36.0854
ptbp1b	seurat_clusters2	1.7888	0.565385	772574	0.63059	7.57081e-20	6.50719e-18	78.4404	55.4093
dscamb	seurat_clusters2	1.1534	0.532495	748822	0.611204	9.05591e-20	7.73904e-18	48.6239	28.6477
pabpc1a	seurat_clusters2	1.48746	0.5193	765426	0.624756	1.56847e-19	1.3067e-17	66.055	45.6228
calm3a	seurat_clusters2	2.34885	0.66801	772382	0.630434	1.67388e-19	1.38676e-17	77.2936	59.3594
dnah9l	seurat_clusters2	1.31608	0.526655	758091	0.618769	2.85396e-19	2.31933e-17	58.7156	38.0783
ppiab	seurat_clusters2	1.39236	0.554107	757953	0.618656	3.03246e-19	2.45769e-17	58.7156	38.0427
ebf3a	seurat_clusters2	2.09911	0.633708	769889	0.628399	5.34795e-19	4.23084e-17	79.5872	58.2918
jag2b	seurat_clusters2	1.70839	0.590049	764272	0.623814	5.55052e-19	4.35642e-17	67.4312	47.4733
tpt1	seurat_clusters2	1.49836	0.596932	756066	0.617116	1.43344e-18	1.08508e-16	58.0275	39.2883
rps27.1	seurat_clusters2	1.68045	0.631198	759284	0.619743	1.76604e-18	1.33011e-16	62.3853	43.6299
gpx1b	seurat_clusters2	1.48747	0.524937	757702	0.618452	4.81478e-18	3.52828e-16	64.4495	43.8078
tmem178b	seurat_clusters2	1.10137	0.505813	739009	0.603194	7.83575e-18	5.65863e-16	44.7248	27.2954
atp5f1b	seurat_clusters2	1.43576	0.501884	756010	0.61707	1.23008e-17	8.71427e-16	63.0734	44.1993
ndufa4l	seurat_clusters2	1.80628	0.531808	754753	0.616044	3.48924e-16	2.15459e-14	72.2477	53.879
pclob	seurat_clusters2	2.0221	0.545683	752530	0.61423	2.22556e-15	1.28141e-13	78.6697	58.0783
nrxn3b	seurat_clusters2	2.87333	0.593567	750644	0.61269	1.52123e-14	7.8496e-13	83.7156	68.0427
dscaml1	seurat_clusters2	1.63994	0.514509	738746	0.602979	9.91739e-14	4.71748e-12	63.5321	46.6904
kcnab2a	seurat_clusters2	1.95965	0.521552	738794	0.603019	4.85126e-13	2.12465e-11	70.8716	54.6263

## Sheet: seurat_clusters3
feature	group	avgExpr	logFC	statistic	auc	pval	padj	pct_in	pct_out
tmc1	seurat_clusters3	3.43692	2.41826	840633	0.878309	8.10449e-142	2.41716e-137	91.7683	34.5442
fam149a	seurat_clusters3	1.96005	1.43423	756103	0.78999	8.07927e-97	1.20482e-92	74.0854	27.0048
cabp1b	seurat_clusters3	2.78172	1.70911	766946	0.801319	3.19809e-86	3.17943e-82	88.7195	39.5476
rbm24a	seurat_clusters3	3.449	1.50836	782727	0.817808	5.30502e-82	3.95555e-78	96.0366	66.2783
atp2a3	seurat_clusters3	2.36257	1.53295	748655	0.782209	1.88553e-81	1.12472e-77	80.4878	34.133
slc17a8	seurat_clusters3	2.73179	1.58705	759815	0.793869	2.71821e-78	1.35118e-74	87.8049	45.0994
frya	seurat_clusters3	2.47243	1.38095	755604	0.789469	8.5731e-74	3.65275e-70	85.3659	49.5888
si:ch211-216b21.2	seurat_clusters3	1.69701	1.17597	698494	0.729799	1.98579e-66	7.40327e-63	64.3293	24.1604
plxna4	seurat_clusters3	2.63341	1.31197	734310	0.767221	1.72717e-61	5.72365e-58	86.5854	54.1124
inhbb	seurat_clusters3	1.40863	0.968168	686225	0.716981	1.10359e-60	3.29144e-57	60.3659	23.6463
prdm16	seurat_clusters3	1.69767	1.13331	686810	0.717591	1.42177e-59	3.85494e-56	63.1098	24.4345
CT030129.1	seurat_clusters3	1.26047	0.907279	663714	0.693461	1.59761e-57	3.97072e-54	53.0488	18.0603
tmc2b	seurat_clusters3	1.7578	1.09096	698098	0.729386	3.68656e-57	8.45782e-54	70.122	31.7341
cib3	seurat_clusters3	1.00529	0.741126	649610	0.678724	6.49613e-56	1.38391e-52	47.561	15.0446
znf536	seurat_clusters3	2.81232	1.32158	723077	0.755484	1.19218e-55	2.37045e-52	88.7195	56.5113
nrxn3a	seurat_clusters3	2.92693	1.32403	723688	0.756122	1.66184e-55	3.09777e-52	89.939	58.0877
prickle2b	seurat_clusters3	2.36078	1.3106	707353	0.739056	1.24108e-54	2.17736e-51	80.1829	41.1241
cyp4v7	seurat_clusters3	1.04896	0.774607	648063	0.677108	8.06749e-54	1.33674e-50	47.8659	15.5586
fgf22	seurat_clusters3	1.16896	0.822282	648986	0.678072	3.5739e-52	5.61008e-49	50.3049	16.4496
tenm2a	seurat_clusters3	3.05071	1.65868	699052	0.730382	1.22903e-51	1.83279e-48	86.8902	38.828
itpr1b	seurat_clusters3	1.57656	0.961236	679133	0.709571	5.41376e-50	7.68882e-47	64.939	29.7121
myo15b	seurat_clusters3	1.54848	0.924338	679060	0.709495	1.35984e-48	1.84352e-45	66.4634	31.2886
cnbd1	seurat_clusters3	1.47974	0.927893	669550	0.699559	2.05087e-48	2.65945e-45	61.8902	26.5593
dachb	seurat_clusters3	1.83925	1.01923	689919	0.72084	3.93672e-48	4.89219e-45	73.4756	39.2392
pex5la	seurat_clusters3	2.41097	1.30061	689716	0.720628	9.05432e-48	1.08018e-44	81.4024	38.8965
scdb	seurat_clusters3	0.88781	0.662042	626332	0.654404	1.47306e-47	1.68977e-44	41.4634	12.8513
kcnab2a	seurat_clusters3	2.55654	1.16623	698756	0.730074	3.34538e-46	3.6954e-43	85.3659	53.5984
myo3b	seurat_clusters3	2.55706	1.18836	697522	0.728784	3.50738e-46	3.73598e-43	85.9756	51.645
cdkl1	seurat_clusters3	0.99178	0.709829	634620	0.663063	2.69494e-44	2.77161e-41	45.4268	16.8266
triob	seurat_clusters3	1.78342	0.971684	677402	0.707762	4.90519e-44	4.87658e-41	71.6463	36.8746
kif19	seurat_clusters3	1.39205	0.86246	664146	0.693913	5.17646e-44	4.98026e-41	60.061	28.9582
xylt1	seurat_clusters3	1.81334	1.00008	676202	0.706509	6.43094e-44	5.99384e-41	69.8171	36.3263
sh2d4bb	seurat_clusters3	1.22888	0.802543	649424	0.678531	1.61753e-43	1.4619e-40	53.3537	22.5497
jag2b	seurat_clusters3	2.15231	1.06203	686642	0.717416	2.0893e-43	1.83275e-40	78.6585	46.95
capga	seurat_clusters3	0.998395	0.671744	630327	0.658577	4.3606e-42	3.71586e-39	46.9512	16.5867
aplp1	seurat_clusters3	1.66845	0.908095	670449	0.700498	8.21248e-42	6.80381e-39	70.122	35.6751
osbpl2b	seurat_clusters3	1.50361	0.873329	663872	0.693625	9.59118e-42	7.73127e-39	63.1098	31.6998
trabd2b	seurat_clusters3	0.697062	0.547016	594756	0.621413	9.93407e-42	7.79694e-39	31.4024	8.22481
pax2a	seurat_clusters3	2.15621	1.02078	682832	0.713435	2.36382e-41	1.80771e-38	79.5732	48.6977
myo1ca	seurat_clusters3	0.957613	0.687781	626572	0.654655	3.35602e-41	2.50233e-38	43.2927	16.244
grid1a	seurat_clusters3	1.267	0.793894	642794	0.671604	6.40017e-41	4.65574e-38	53.9634	21.8986
baiap2l2b	seurat_clusters3	1.69752	0.882625	674054	0.704264	8.63838e-41	6.13428e-38	70.122	41.1583
si:dkey-26i13.8	seurat_clusters3	1.29737	0.797301	650746	0.679911	1.18261e-40	8.20265e-38	56.7073	25.9082
CU571064.1	seurat_clusters3	0.983626	0.650255	626680	0.654767	1.35842e-38	8.62017e-36	46.3415	17.8547
cacnb3b	seurat_clusters3	1.67944	0.884439	659370	0.688922	4.37999e-37	2.66599e-34	68.2927	36.3948
KLHL29	seurat_clusters3	1.24421	0.763261	630720	0.658988	2.26408e-36	1.35052e-33	51.5244	21.0761
kcnh3	seurat_clusters3	1.22721	0.7636	631422	0.659721	2.65591e-36	1.55319e-33	50.6098	21.5901
myo10l3	seurat_clusters3	1.69518	0.899643	656962	0.686406	3.07252e-36	1.76227e-33	66.7683	36.3605
lrp2a	seurat_clusters3	1.50206	0.863523	637130	0.665686	5.88682e-36	3.31272e-33	57.9268	24.1261
zdhhc16b	seurat_clusters3	1.82365	0.914024	659572	0.689134	6.58247e-36	3.6356e-33	72.2561	38.9993
otomp	seurat_clusters3	1.32638	0.818469	634655	0.663099	1.05153e-35	5.70217e-33	52.7439	23.6806
ptprnb	seurat_clusters3	0.956393	0.614133	617748	0.645434	6.04683e-34	3.22048e-31	45.122	18.3002
hcn1	seurat_clusters3	2.13511	0.959062	660431	0.690031	1.44404e-33	7.5559e-31	79.2683	46.8814
micu3a	seurat_clusters3	1.32132	0.749291	636972	0.665521	1.93956e-33	9.97368e-31	57.0122	27.7587
fut8a	seurat_clusters3	2.39171	0.915585	665868	0.695711	6.05116e-33	3.00793e-30	83.5366	60.281
stard15	seurat_clusters3	1.64625	0.834538	645334	0.674257	1.4701e-32	7.18784e-30	66.4634	34.7156
cox8b	seurat_clusters3	1.46027	0.785158	641816	0.670581	2.91746e-32	1.40344e-29	60.061	33.1391
ano2b	seurat_clusters3	1.52608	0.784281	637114	0.665668	2.5167e-31	1.19144e-28	61.2805	31.2543
sema6e	seurat_clusters3	1.62417	0.838157	638391	0.667003	6.91274e-31	3.22144e-28	63.7195	32.9678
gfi1aa	seurat_clusters3	1.77671	0.806262	651342	0.680534	7.88887e-31	3.61978e-28	72.2561	46.0589
zgc:153867	seurat_clusters3	1.05898	0.63086	616863	0.64451	9.69876e-30	4.19226e-27	47.2561	22.3441
cntn3b	seurat_clusters3	0.832024	0.548149	592876	0.619447	4.18371e-29	1.78256e-26	36.5854	13.4339
myo6b	seurat_clusters3	2.70603	0.93973	653750	0.68305	1.19521e-28	4.951e-26	89.0244	63.5709
si:ch73-138i16.1	seurat_clusters3	0.998994	0.605304	607693	0.634929	2.91887e-28	1.17642e-25	44.5122	19.7395
CR847968.1	seurat_clusters3	1.12513	0.658724	608912	0.636202	3.7177e-28	1.47841e-25	46.3415	20.2879
sema6dl	seurat_clusters3	0.919258	0.567796	602954	0.629977	7.1989e-28	2.82509e-25	42.378	18.1289
dachc	seurat_clusters3	1.41766	0.713252	631173	0.659461	1.01354e-27	3.92581e-25	61.2805	34.7841
hsp70.2	seurat_clusters3	2.61427	1.17168	639798	0.668473	1.08043e-27	4.13125e-25	75.3049	42.9061
atp1a1b	seurat_clusters3	1.10143	0.648909	601869	0.628844	1.08813e-26	4.05669e-24	43.9024	18.8143
shisa2a	seurat_clusters3	0.780974	0.502032	589386	0.615801	6.20993e-26	2.25867e-23	36.5854	14.7704
kif1aa	seurat_clusters3	2.64506	0.810191	645734	0.674675	6.8887e-26	2.4459e-23	90.8537	68.4716
zmat4a	seurat_clusters3	1.87372	0.825746	632776	0.661136	7.48781e-26	2.59679e-23	72.8659	41.5353
emb	seurat_clusters3	1.56724	0.697582	632879	0.661244	7.63928e-26	2.61887e-23	63.4146	42.769
ush2a	seurat_clusters3	2.12019	0.876107	636400	0.664923	9.60158e-26	3.25417e-23	76.2195	46.95
kcnn2	seurat_clusters3	1.35188	0.692411	618508	0.646228	1.26772e-25	4.24828e-23	56.7073	29.6436
myo15aa	seurat_clusters3	1.91337	0.764287	637271	0.665833	1.63994e-25	5.43457e-23	77.1341	49.6916
si:dkey-57n24.6	seurat_clusters3	1.029	0.609622	602858	0.629877	2.82238e-25	9.14974e-23	44.2073	21.2132
igsf21a	seurat_clusters3	2.0351	0.834102	634074	0.662493	6.63062e-25	2.12643e-22	74.0854	47.9438
agbl4.1	seurat_clusters3	1.50652	0.717883	621662	0.649525	9.98454e-25	3.16797e-22	60.3659	34.4071
tox3	seurat_clusters3	1.15718	0.609861	613950	0.641466	1.38348e-24	4.34341e-22	53.0488	28.8554
hpca	seurat_clusters3	1.2792	0.645228	619402	0.647162	1.71032e-24	5.31358e-22	56.4024	33.379
clic5b	seurat_clusters3	1.2462	0.610033	620543	0.648355	1.76675e-24	5.4323e-22	56.7073	34.4757
iqsec1b	seurat_clusters3	2.7217	0.857499	640237	0.668931	2.1085e-24	6.41695e-22	88.4146	67.2721
ckbb	seurat_clusters3	2.35023	0.887874	634536	0.662975	3.18168e-24	9.48936e-22	79.5732	52.6731
abca2	seurat_clusters3	1.2416	0.630911	616444	0.644072	3.21612e-24	9.4971e-22	54.878	31.6313
mctp1a	seurat_clusters3	1.86729	0.763564	631010	0.659291	3.82889e-24	1.10871e-21	74.3902	47.0528
cdc14ab	seurat_clusters3	1.75779	0.725439	630058	0.658296	5.77431e-24	1.65595e-21	69.2073	47.0528
srrm4	seurat_clusters3	1.44088	0.681378	618164	0.645869	7.67203e-24	2.17922e-21	60.061	33.7217
nrxn3b	seurat_clusters3	3.33837	1.08891	637289	0.665851	1.55922e-23	4.38713e-21	95.4268	67.3064
ano8a	seurat_clusters3	0.880306	0.529365	595326	0.622008	1.69151e-23	4.71488e-21	40.8537	20.0137
si:dkey-151g10.6	seurat_clusters3	1.5682	0.720686	619906	0.647689	2.05432e-23	5.62112e-21	62.1951	36.7032
wdr95	seurat_clusters3	1.33773	0.636502	618058	0.645758	3.10194e-23	8.33473e-21	58.8415	35.7094
tmem269	seurat_clusters3	2.2585	0.852026	631540	0.659844	3.74057e-23	9.96095e-21	82.3171	54.0781
rpl37.1	seurat_clusters3	1.37613	0.659865	613334	0.640823	7.42145e-23	1.94162e-20	57.0122	32.4195
FP236822.2	seurat_clusters3	1.33256	0.634438	612894	0.640364	1.16354e-22	3.01762e-20	56.0976	32.6936
tagapa	seurat_clusters3	1.10874	0.593914	606708	0.6339	1.23498e-22	3.17527e-20	49.0854	28.2042
BX294434.1	seurat_clusters3	1.06208	0.559886	603241	0.630277	3.62661e-22	9.08939e-20	48.7805	26.6621
baiap2l2a	seurat_clusters3	0.936721	0.514668	598281	0.625095	5.07129e-22	1.26043e-19	45.4268	23.8177
adgrv1	seurat_clusters3	1.5643	0.669884	617535	0.645212	8.93221e-22	2.18363e-19	65.8537	40.0274
b4galt2	seurat_clusters3	1.65676	0.69503	618794	0.646527	9.70543e-22	2.33439e-19	66.4634	41.8437
SSBP4	seurat_clusters3	1.10514	0.551523	603253	0.63029	1.11244e-21	2.65428e-19	50.6098	27.6217
brinp1	seurat_clusters3	0.874613	0.505407	586896	0.6132	1.13376e-21	2.68367e-19	39.3293	18.2659
s100t	seurat_clusters3	1.86683	0.773247	614630	0.642177	1.16762e-21	2.74206e-19	65.2439	36.9774
ncanb	seurat_clusters3	1.64709	0.670077	616601	0.644236	6.35237e-21	1.45738e-18	68.5976	42.5977
mfsd8l2	seurat_clusters3	1.35781	0.579619	613866	0.641379	1.39083e-20	3.14253e-18	60.9756	41.2611
atp8a2	seurat_clusters3	1.93495	0.747876	618033	0.645732	1.85043e-20	4.11859e-18	73.1707	47.2584
ppfibp2b	seurat_clusters3	1.01042	0.519896	596796	0.623544	2.66256e-20	5.79642e-18	47.2561	26.3194
ndrg3b	seurat_clusters3	2.24473	0.691797	623760	0.651717	3.1446e-20	6.79621e-18	83.8415	63.4681
ccdc88c	seurat_clusters3	1.63774	0.622917	617196	0.644858	4.53454e-20	9.72968e-18	66.4634	49.1775
GARNL3	seurat_clusters3	1.35026	0.60577	606290	0.633463	1.2505e-19	2.64512e-17	57.3171	36.3263
ATP8A1	seurat_clusters3	1.25591	0.587851	599018	0.625865	1.64964e-19	3.44059e-17	53.0488	29.7121
cacna1da	seurat_clusters3	1.79754	0.665772	613978	0.641496	2.70991e-19	5.57401e-17	71.0366	48.1151
ptprq	seurat_clusters3	2.05764	0.729517	615449	0.643033	4.64144e-19	9.48157e-17	77.7439	52.536
ncam1b	seurat_clusters3	2.33717	0.826691	615716	0.643312	5.80569e-19	1.16996e-16	80.4878	53.8725
nptna	seurat_clusters3	2.14758	0.67025	617033	0.644688	7.03384e-19	1.40795e-16	79.5732	58.8074
fhod1	seurat_clusters3	1.0917	0.523692	596265	0.622989	8.74935e-19	1.71677e-16	50.3049	29.7464
calm1b	seurat_clusters3	2.00209	0.681162	613359	0.640849	1.51108e-18	2.94563e-16	75.6098	52.6045
sesn1	seurat_clusters3	1.22305	0.546776	601070	0.628009	1.53596e-18	2.97468e-16	55.4878	34.9897
prkg1a	seurat_clusters3	1.00569	0.512557	589225	0.615633	2.05585e-18	3.9305e-16	45.122	25.3941
zgc:158463	seurat_clusters3	4.94848	1.52044	616684	0.644323	4.54871e-18	8.58642e-16	98.4756	70.7334
hsp70l	seurat_clusters3	2.81886	0.958021	612494	0.639945	5.93921e-18	1.10711e-15	79.5732	56.3057
CT027638.1	seurat_clusters3	3.91299	1.15071	615652	0.643245	7.79612e-18	1.4353e-15	97.561	70.4592
myo7aa	seurat_clusters3	1.30511	0.554014	601347	0.628298	8.33463e-18	1.51573e-15	58.2317	38.3825
si:ch211-66k16.28	seurat_clusters3	1.08803	0.501894	591464	0.617973	1.46758e-17	2.63679e-15	49.6951	29.3009
calm1a	seurat_clusters3	1.32033	0.557696	594722	0.621377	1.56128e-17	2.78834e-15	54.878	32.0768
nfixa	seurat_clusters3	1.39757	0.570136	597792	0.624585	3.15854e-17	5.60736e-15	58.5366	36.5661
gstp1	seurat_clusters3	1.32883	0.575803	594724	0.621379	4.11685e-17	7.18042e-15	53.9634	33.8931
calm3a	seurat_clusters3	2.43319	0.737099	609838	0.637171	4.61741e-17	7.96036e-15	82.3171	59.4585
svila	seurat_clusters3	1.58666	0.574849	604150	0.631227	5.25754e-17	8.96036e-15	67.0732	46.95
hsp70.1	seurat_clusters3	2.16653	0.756732	606043	0.633205	6.71118e-17	1.13728e-14	73.7805	51.268
auts2a	seurat_clusters3	2.59019	0.719113	610635	0.638003	8.79334e-17	1.45701e-14	88.1098	68.026
hbaa1	seurat_clusters3	1.1877	0.530472	589332	0.615744	1.20734e-16	1.9677e-14	50.3049	30.3633
otofa	seurat_clusters3	2.29232	0.884612	600359	0.627266	1.76461e-16	2.82954e-14	72.561	43.2488
dnah5	seurat_clusters3	2.11399	0.690131	605129	0.63225	3.16925e-16	5.00122e-14	78.6585	56.0315
nfixb	seurat_clusters3	2.33926	0.774647	604269	0.631351	3.54213e-16	5.5311e-14	80.4878	53.8725
palld	seurat_clusters3	1.50905	0.582307	597002	0.623759	4.2398e-16	6.55192e-14	62.5	41.3297
akt3a	seurat_clusters3	2.13389	0.663084	603746	0.630804	8.88049e-16	1.33096e-13	79.5732	57.7793
celsr1a	seurat_clusters3	1.71283	0.552528	601980	0.62896	9.75896e-16	1.4553e-13	71.3415	53.804
syne1b	seurat_clusters3	1.7403	0.578873	600254	0.627156	1.39211e-15	2.06565e-13	69.8171	51.1995
pcsk5a	seurat_clusters3	1.83645	0.580354	600513	0.627427	2.39843e-15	3.50654e-13	73.4756	54.2495
prkcbb	seurat_clusters3	1.37576	0.562103	590888	0.617371	2.43972e-15	3.54949e-13	56.0976	37.5257
si:dkey-103g5.4	seurat_clusters3	1.32944	0.520075	590573	0.617042	4.03207e-15	5.75391e-13	57.622	38.1768
tmc5	seurat_clusters3	1.4695	0.556469	592953	0.619528	4.13655e-15	5.87489e-13	61.8902	41.4668
appa	seurat_clusters3	1.37775	0.501727	594816	0.621475	4.28629e-15	6.0587e-13	59.1463	45.2022
strc	seurat_clusters3	2.11605	0.724467	597798	0.62459	4.46109e-15	6.27604e-13	75.3049	49.9657
grip1	seurat_clusters3	1.43949	0.513029	591534	0.618046	1.62195e-14	2.14998e-12	63.1098	43.2831
pclob	seurat_clusters3	2.09388	0.605339	595944	0.622653	5.31147e-14	6.79891e-12	78.9634	58.8074
gapdhs	seurat_clusters3	2.39259	0.600513	596730	0.623475	7.77526e-14	9.82615e-12	82.9268	65.6614
znf385a	seurat_clusters3	1.50819	0.546505	587019	0.613328	1.09491e-13	1.35488e-11	60.6707	41.9808
nectin1b	seurat_clusters3	1.58685	0.538715	587037	0.613347	2.56265e-13	2.9973e-11	62.5	44.9966
pkig	seurat_clusters3	1.61507	0.505509	589092	0.615494	3.472e-13	4.04501e-11	65.8537	50.7882
CABZ01080568.1	seurat_clusters3	1.4444	0.557744	579788	0.605773	3.90295e-13	4.49442e-11	56.7073	34.8869
laptm4b	seurat_clusters3	2.11575	0.639188	590228	0.616681	6.11668e-13	6.95233e-11	78.0488	56.5113
dacha	seurat_clusters3	1.83994	0.578392	586360	0.61264	1.09459e-12	1.20023e-10	70.7317	49.3146
si:dkey-222f2.1	seurat_clusters3	2.02541	0.528318	586868	0.613171	4.40348e-12	4.40718e-10	75.6098	60.4524
atp1b2b	seurat_clusters3	2.14732	0.605871	584217	0.610401	1.0164e-11	9.93901e-10	78.9634	56.7855
espnla	seurat_clusters3	1.08067	0.501315	561848	0.587029	2.20938e-11	2.08528e-09	39.939	24.6744
si:ch211-243g18.2	seurat_clusters3	2.46733	0.523705	584062	0.610239	3.28856e-11	3.00863e-09	84.7561	70.0822
lrba	seurat_clusters3	2.52485	0.524052	584160	0.610341	3.86989e-11	3.48699e-09	88.4146	74.4688
shank3a	seurat_clusters3	2.49566	0.529928	570350	0.595912	7.04671e-09	4.6808e-07	84.4512	67.4435
fosb	seurat_clusters3	1.9731	0.521679	567155	0.592574	7.35781e-09	4.86578e-07	67.378	53.1871
dnajb1b	seurat_clusters3	1.77721	0.507638	565660	0.591012	9.34468e-09	6.01955e-07	64.0244	50.5141
kcnma1a	seurat_clusters3	2.33186	0.540044	567911	0.593364	1.41919e-08	8.911e-07	82.9268	63.4681
hsp90aa1.2	seurat_clusters3	2.97578	0.609633	560620	0.585746	2.42878e-07	1.19142e-05	85.9756	69.294
CR383676.2	seurat_clusters3	5.41704	0.92455	559700	0.584785	4.32268e-07	2.02075e-05	95.4268	82.0082

## Sheet: seurat_clusters4
feature	group	avgExpr	logFC	statistic	auc	pval	padj	pct_in	pct_out
cabp2b	seurat_clusters4	3.34324	2.76926	868520	0.914881	3.50762e-199	1.04615e-194	92	23.7932
si:dkeyp-72h1.1	seurat_clusters4	1.18767	1.13981	688090	0.72482	2.54561e-192	3.79614e-188	47.0769	2.84149
ndst3	seurat_clusters4	1.49306	1.35938	724366	0.763033	5.49699e-175	5.46492e-171	57.8462	6.26498
s100s	seurat_clusters4	4.02985	3.21884	861420	0.907403	3.86665e-174	2.88307e-170	92.9231	29.4762
loxhd1b	seurat_clusters4	0.732423	0.704525	634482	0.668351	1.2652e-156	7.5469e-153	35.0769	1.54057
si:dkey-172j4.3	seurat_clusters4	1.31314	1.1644	699017	0.736331	7.13695e-137	3.54766e-133	53.5385	7.25779
myo1ha	seurat_clusters4	0.66159	0.622872	632370	0.666126	3.50608e-135	1.49384e-131	35.3846	2.2595
etnppl	seurat_clusters4	0.650243	0.591113	645214	0.679655	5.28016e-128	1.96851e-124	39.3846	3.38925
zgc:158263	seurat_clusters4	1.32527	1.11889	725778	0.76452	2.09755e-127	6.95105e-124	62.1538	11.8453
atp6v1c2	seurat_clusters4	0.971314	0.838023	684174	0.720695	9.24893e-116	2.75849e-112	51.3846	8.01096
kcnh7	seurat_clusters4	1.47624	1.27152	699099	0.736417	2.89609e-114	7.85234e-111	55.3846	10.202
anxa5a	seurat_clusters4	1.86043	1.52246	736596	0.775915	1.01262e-110	2.51679e-107	65.5385	17.6994
pvalb9	seurat_clusters4	3.64961	2.60522	797022	0.839567	6.17451e-110	1.41658e-106	85.8462	38.2746
dok6	seurat_clusters4	1.21291	1.04252	676278	0.712377	4.13182e-105	8.80225e-102	49.5385	8.55871
znf385b	seurat_clusters4	1.42442	1.21949	682937	0.719392	9.13281e-104	1.81591e-100	51.6923	9.65423
ttc7a	seurat_clusters4	0.669646	0.576256	646443	0.68095	1.93806e-96	3.40016e-93	42.1538	6.12804
kcng4a	seurat_clusters4	0.719596	0.631309	633608	0.667431	2.11091e-93	3.49766e-90	38.4615	5.16946
pcdh15a	seurat_clusters4	2.07832	1.49426	733430	0.772581	1.01433e-92	1.59223e-89	74.4615	22.6977
otofb	seurat_clusters4	3.48277	1.64587	778688	0.820255	1.59777e-83	2.38267e-80	96.9231	62.2732
odf3l2a	seurat_clusters4	0.668474	0.5928	619332	0.652391	2.10947e-83	2.99594e-80	34.7692	4.86135
RASSF5	seurat_clusters4	0.98516	0.795504	669144	0.704863	7.14689e-83	9.26765e-80	50.7692	11.5371
abhd12	seurat_clusters4	2.20178	1.35449	746972	0.786846	1.95139e-77	2.32801e-74	82.1538	40.671
GRIK2	seurat_clusters4	1.01082	0.843586	642820	0.677134	2.13083e-77	2.44431e-74	43.0769	8.49024
loxhd1a	seurat_clusters4	1.64456	1.17743	707108	0.744854	7.07793e-77	7.81849e-74	68	22.4238
pcdh7a	seurat_clusters4	1.58909	1.11528	703972	0.741551	7.75728e-73	7.97796e-70	68.3077	23.622
tmem240b	seurat_clusters4	0.67797	0.548294	633896	0.667734	2.278e-70	2.19166e-67	41.5385	8.49024
KCNB2	seurat_clusters4	0.966676	0.881614	591638	0.62322	1.14849e-68	1.03799e-65	27.6923	3.76583
xirp2a	seurat_clusters4	1.18843	0.861172	675290	0.711336	7.90887e-67	6.93771e-64	58.4615	17.9391
twf2a	seurat_clusters4	0.971389	0.712804	664686	0.700167	9.0541e-67	7.71539e-64	54.4615	15.2345
cables1	seurat_clusters4	0.92383	0.740199	634992	0.668888	1.09049e-65	9.03439e-63	42.7692	9.68846
gal3st3	seurat_clusters4	2.46139	1.35379	724025	0.762673	5.19494e-62	4.18755e-59	84.9231	46.354
CR352265.3	seurat_clusters4	0.716239	0.549123	635381	0.669298	1.20689e-61	9.47248e-59	44.3077	10.7497
chrna9	seurat_clusters4	0.714732	0.563043	627342	0.66083	2.85723e-59	2.13042e-56	41.2308	9.99658
atp2b2	seurat_clusters4	0.902911	0.661146	637516	0.671546	9.61132e-54	6.66646e-51	47.3846	13.8993
triobpa	seurat_clusters4	1.05635	0.715466	657578	0.69268	5.79102e-53	3.75472e-50	56.9231	19.9589
tmc2a	seurat_clusters4	2.31467	1.31015	691329	0.728232	3.94925e-52	2.50609e-49	76	36.8025
oaz2a	seurat_clusters4	1.23003	0.828264	654382	0.689313	4.93804e-49	2.83225e-46	56	21.7049
ptprt	seurat_clusters4	1.00849	0.731074	626376	0.659812	1.84646e-48	1.03907e-45	44.3077	13.4543
fhdc1	seurat_clusters4	0.781737	0.556749	617759	0.650735	1.05482e-44	5.51931e-42	42.7692	12.9065
galnt11	seurat_clusters4	1.11015	0.70889	646840	0.681368	2.33757e-44	1.18166e-41	56.3077	22.3896
pclob	seurat_clusters4	2.54442	1.10539	688058	0.724787	6.42533e-43	3.04183e-40	88	57.8227
cers1	seurat_clusters4	1.03931	0.670006	642294	0.67658	6.33319e-43	3.04183e-40	54.4615	21.8418
atp1a3b	seurat_clusters4	2.92326	1.16835	684618	0.721163	3.67861e-41	1.66234e-38	89.8462	60.3218
tmbim1b	seurat_clusters4	1.16662	0.691677	647658	0.682231	2.70525e-40	1.18653e-37	60.6154	26.8059
atp2b1a	seurat_clusters4	2.8156	0.98334	681634	0.718019	3.2304e-39	1.33815e-36	91.6923	66.9976
gramd2aa	seurat_clusters4	1.06357	0.644637	633206	0.667006	1.08768e-37	4.38378e-35	55.6923	22.6635
kncn	seurat_clusters4	0.856595	0.581702	607512	0.639942	7.24098e-37	2.6662e-34	41.5385	14.2075
cib2	seurat_clusters4	1.13888	0.643511	640868	0.675078	9.30077e-37	3.38287e-34	62.1538	27.4564
tnr	seurat_clusters4	1.02799	0.649017	619187	0.652239	2.16087e-36	7.76483e-34	48.6154	18.2472
MAP3K13	seurat_clusters4	0.962898	0.601156	620860	0.654001	3.30784e-36	1.17448e-33	49.2308	19.0688
lyst	seurat_clusters4	1.13373	0.685115	629383	0.662979	1.24592e-35	4.32088e-33	54.1538	23.2455
far1	seurat_clusters4	1.03331	0.65353	622404	0.655628	1.72571e-35	5.91603e-33	49.8462	20.404
tlr7.1	seurat_clusters4	0.896355	0.596297	609948	0.642507	2.07994e-35	7.04934e-33	43.0769	15.9534
fhod3b	seurat_clusters4	1.39341	0.809796	631212	0.664907	2.62753e-35	8.80519e-33	56.6154	24.3752
kcnn2	seurat_clusters4	1.46284	0.815005	638286	0.672358	1.11337e-34	3.64905e-32	60.3077	29.2708
atp1b2b	seurat_clusters4	2.49915	0.996218	663750	0.699182	2.26096e-34	7.32968e-32	84	56.2479
nat16	seurat_clusters4	1.27675	0.720293	636381	0.670351	5.8994e-34	1.89193e-31	60.6154	29.1681
rims2a	seurat_clusters4	1.05646	0.625233	620004	0.6531	2.01841e-32	6.14275e-30	52.3077	22.4238
ip6k2a	seurat_clusters4	1.23707	0.687384	633405	0.667216	7.12175e-32	2.08241e-29	59.6923	30.9825
adam11	seurat_clusters4	0.850383	0.540194	596154	0.627977	7.80174e-32	2.2591e-29	39.6923	13.8651
bdnf	seurat_clusters4	1.36778	0.702863	636461	0.670435	2.74526e-31	7.79786e-29	63.0769	34.3718
C5H11orf1	seurat_clusters4	0.833797	0.511791	606652	0.639035	9.88758e-31	2.70548e-28	45.5385	18.4868
nfyc	seurat_clusters4	0.954123	0.543764	613104	0.645831	1.01629e-29	2.63573e-27	51.3846	22.3211
tpd52l1	seurat_clusters4	1.24098	0.619973	630548	0.664206	1.84106e-29	4.73359e-27	65.5385	33.3447
si:dkey-91i10.2	seurat_clusters4	0.853449	0.51702	604816	0.637102	2.26101e-29	5.76363e-27	45.8462	19.0688
osbpl3b	seurat_clusters4	1.39731	0.732402	627257	0.66074	3.92276e-29	9.7497e-27	61.2308	31.8042
ckmt1	seurat_clusters4	0.862889	0.528819	604120	0.636367	6.72052e-29	1.62959e-26	44.6154	19.4112
nexmifa	seurat_clusters4	0.850587	0.507092	605006	0.637301	1.67361e-28	3.93034e-26	46.7692	20.0959
lmo7b	seurat_clusters4	1.02984	0.570933	612640	0.645342	2.75495e-27	6.17793e-25	52.9231	25.6761
trim3b	seurat_clusters4	1.34358	0.638834	625638	0.659035	3.95554e-27	8.67456e-25	66.7692	34.8853
zdhhc16b	seurat_clusters4	1.71458	0.791878	629852	0.663474	4.8372e-27	1.05306e-24	67.6923	39.5413
si:dkey-17m8.1	seurat_clusters4	1.07056	0.554838	617571	0.650537	8.05614e-27	1.72859e-24	58.4615	29.5447
gal3st1a	seurat_clusters4	1.4147	0.675068	625000	0.658363	3.15509e-26	6.6738e-24	64.6154	37.2475
arfgef1	seurat_clusters4	1.78075	0.756677	632672	0.666444	4.60568e-26	9.67354e-24	74.7692	46.7648
IQSEC1	seurat_clusters4	1.01813	0.551078	604648	0.636924	2.87373e-25	5.79115e-23	50.1538	24.341
eya4	seurat_clusters4	1.89245	0.748076	631314	0.665014	1.18958e-24	2.31891e-22	80.3077	52.2766
spsb4a	seurat_clusters4	1.83995	0.723345	630084	0.663718	1.43477e-24	2.76077e-22	78.7692	50.4964
kif13ba	seurat_clusters4	1.37018	0.620682	620499	0.653621	1.58162e-24	3.02383e-22	66.4615	37.9322
camk2g2	seurat_clusters4	1.44438	0.657994	622001	0.655203	1.88968e-24	3.56707e-22	64.9231	40.1917
kif1aa	seurat_clusters4	2.63985	0.803571	635294	0.669206	3.29918e-24	6.14987e-22	91.6923	68.4012
dscaml1	seurat_clusters4	1.88171	0.763624	623962	0.657269	1.45696e-23	2.6177e-21	71.0769	46.4909
pbx3b	seurat_clusters4	2.62888	0.818964	631234	0.66493	3.57787e-23	6.3142e-21	84.3077	67.5111
camk2b1	seurat_clusters4	1.0131	0.544379	597402	0.629292	5.76039e-23	9.93084e-21	48.6154	23.9986
ccdc102a	seurat_clusters4	1.23091	0.592454	609759	0.642308	6.02144e-23	1.03212e-20	58.7692	32.797
mical2b	seurat_clusters4	1.47398	0.628192	618402	0.651412	6.3687e-23	1.08541e-20	71.3846	41.3557
ppargc1b	seurat_clusters4	0.969054	0.505399	600034	0.632063	6.58417e-23	1.11576e-20	51.6923	25.6077
nptna	seurat_clusters4	2.26751	0.80283	626941	0.660407	1.14322e-22	1.88379e-20	86.7692	58.0281
pcdh1b	seurat_clusters4	1.02991	0.521589	588739	0.620166	1.13927e-22	1.88379e-20	45.2308	19.5481
tjap1	seurat_clusters4	1.81229	0.692391	623642	0.656932	1.27026e-22	2.08162e-20	76.9231	51.318
akt3a	seurat_clusters4	2.23787	0.777946	625206	0.658579	2.75469e-22	4.3935e-20	78.4615	57.9254
atp6v0a1a	seurat_clusters4	1.13782	0.529896	606575	0.638954	4.98955e-22	7.87372e-20	60	32.4204
rimbp2.1	seurat_clusters4	0.99328	0.539036	590298	0.621809	2.68903e-21	4.05052e-19	44.9231	22.9031
hsd17b7	seurat_clusters4	1.37911	0.589878	610748	0.64335	3.497e-21	5.13783e-19	65.5385	39.7124
creb5b	seurat_clusters4	0.842667	0.510516	569492	0.599891	3.90942e-21	5.7156e-19	33.2308	13.3516
s100t	seurat_clusters4	2.07431	1.00302	606471	0.638844	1.42085e-20	2.00838e-18	57.5385	37.8637
nrxn3b	seurat_clusters4	3.09354	0.815724	619873	0.652962	4.18514e-20	5.64804e-18	88.6154	68.0931
si:ch211-286b4.4	seurat_clusters4	1.73878	0.67234	608640	0.641129	2.14312e-19	2.67441e-17	69.8462	45.8747
si:dkey-11c5.11	seurat_clusters4	1.01237	0.51751	586056	0.61734	3.16759e-19	3.8878e-17	46.4615	24.1698
synrg	seurat_clusters4	1.30076	0.54655	602598	0.634765	4.86513e-19	5.94683e-17	64.6154	39.1304
strbp	seurat_clusters4	1.71769	0.645394	608342	0.640816	5.62369e-19	6.81815e-17	69.5385	48.3396
smap1	seurat_clusters4	1.69816	0.607217	608662	0.641152	9.37845e-19	1.11439e-16	76.6154	50.0171
unc5a	seurat_clusters4	1.61246	0.717119	596439	0.628277	1.86333e-18	2.1624e-16	55.6923	35.0565
sgip1a	seurat_clusters4	1.99227	0.643136	608506	0.640989	5.2303e-18	5.93132e-16	80	56.9668
cacna2d2a	seurat_clusters4	1.52949	0.612777	598596	0.630549	9.85746e-18	1.09701e-15	63.3846	40.5341
cpeb4b	seurat_clusters4	1.9128	0.602161	604968	0.637261	4.26674e-17	4.48083e-15	79.3846	57.7542
sptan1	seurat_clusters4	1.35346	0.536163	597037	0.628907	4.54041e-17	4.7515e-15	63.6923	42.0746
cdh23	seurat_clusters4	1.35198	0.569934	591169	0.622726	6.95334e-17	7.20081e-15	56	35.6727
ptbp3	seurat_clusters4	2.37581	0.650722	601698	0.633817	8.67006e-16	8.15724e-14	88.9231	67.0318
igfbp5b	seurat_clusters4	1.2991	0.51874	586314	0.617611	2.18627e-15	1.96402e-13	59.0769	36.6313
adarb1b	seurat_clusters4	1.47583	0.554137	584600	0.615805	7.59296e-15	6.58314e-13	59.3846	37.2818
sema5ba	seurat_clusters4	1.24595	0.60137	568933	0.599303	3.4904e-14	2.84429e-12	42.1538	24.7176
ptprq	seurat_clusters4	1.88512	0.537052	586120	0.617407	3.04241e-13	2.20778e-11	70.1538	53.4064
pbx1a	seurat_clusters4	1.50106	0.514525	580666	0.611662	8.32539e-13	5.6305e-11	65.5385	45.3612
eya1	seurat_clusters4	2.69354	0.504125	586377	0.617678	2.74217e-12	1.74755e-10	92.6154	80.9312
myo6b	seurat_clusters4	2.4078	0.607356	583114	0.614241	5.12864e-12	3.16691e-10	85.2308	64.0192
kcnab1a	seurat_clusters4	1.16417	0.638407	552225	0.581703	1.66665e-10	8.55559e-09	35.6923	23.5193
col18a1a	seurat_clusters4	1.83418	0.509033	569191	0.599574	6.14103e-10	2.92115e-08	72.6154	53.0298
NC-002333.17	seurat_clusters4	1.55006	0.573362	534233	0.56275	2.71801e-06	6.51645e-05	36.6154	27.114
mt-co1	seurat_clusters4	1.57727	0.544383	535098	0.563662	3.83157e-06	8.83126e-05	38.1538	29.7843
mt-atp6	seurat_clusters4	1.35182	0.527863	523097	0.55102	4.12326e-05	0.000710024	29.5385	22.2527
NC-002333.4	seurat_clusters4	2.67152	0.522383	531274	0.559633	9.92402e-05	0.00152412	45.5385	43.7179

## Sheet: seurat_clusters5
feature	group	avgExpr	logFC	statistic	auc	pval	padj	pct_in	pct_out
spega	seurat_clusters5	1.08685	0.966728	576565	0.722418	5.8773e-120	1.75291e-115	50	6.31296
csmd3a.1	seurat_clusters5	1.01862	0.901845	554251	0.69446	8.71634e-101	1.29982e-96	44.0299	5.80927
rem1	seurat_clusters5	1.723	1.31147	632219	0.792151	9.22719e-95	9.17337e-91	75	21.2895
lrrc38b	seurat_clusters5	0.726661	0.648969	534308	0.669472	1.23976e-93	9.24395e-90	38.0597	4.43251
dpp6b	seurat_clusters5	2.17791	1.64861	631340	0.79105	3.28642e-92	1.96035e-88	75	22.0954
zgc:56628	seurat_clusters5	1.2102	0.988584	564670	0.707515	2.22919e-82	1.10809e-78	50.7463	9.7045
kcnd3	seurat_clusters5	1.33907	1.07541	573206	0.71821	3.05227e-82	1.30048e-78	54.4776	11.182
atp8a1	seurat_clusters5	1.99091	1.37715	632202	0.79213	1.00794e-81	3.75772e-78	80.597	27.7032
cadpsb	seurat_clusters5	1.39794	1.10678	588224	0.737027	4.8842e-81	1.61857e-77	59.7015	14.6407
lrp1bb	seurat_clusters5	1.30987	1.00715	586668	0.735077	6.54025e-79	1.95063e-75	60.8209	14.8086
otofa	seurat_clusters5	3.38385	2.05654	648433	0.812467	3.75033e-76	1.01685e-72	96.6418	41.6723
asic2	seurat_clusters5	1.28528	0.987936	580200	0.726973	7.35262e-75	1.82743e-71	58.9552	14.5735
gdpd5b	seurat_clusters5	1.31213	0.965773	593184	0.743241	1.89535e-74	4.34838e-71	65.6716	17.9651
cdhr1a	seurat_clusters5	1.20826	0.976421	562002	0.704171	2.23612e-71	4.44614e-68	50.3731	11.7864
sphkap	seurat_clusters5	0.757782	0.641128	529508	0.663457	2.80634e-70	5.2312e-67	38.806	6.51444
creb5b	seurat_clusters5	1.38191	1.08852	561440	0.703468	1.69393e-69	2.97185e-66	51.4925	12.0887
CR377229.1	seurat_clusters5	1.06972	0.810238	562515	0.704814	1.31603e-68	2.18059e-65	54.1045	12.3909
igfbp5b	seurat_clusters5	2.00737	1.28081	623797	0.781599	6.94461e-68	1.09012e-64	81.3433	35.0571
KCNT1	seurat_clusters5	0.747782	0.614583	532154	0.666772	3.46254e-67	5.16352e-64	40.6716	7.35393
kifl	seurat_clusters5	0.934741	0.734444	554576	0.694867	4.02849e-67	5.72141e-64	49.6269	11.2827
atp8a1	seurat_clusters5	2.19611	1.34346	626112	0.7845	2.49735e-66	3.38561e-63	86.194	38.2136
stard15	seurat_clusters5	2.09953	1.31179	618116	0.774481	1.74244e-65	2.25949e-62	84.3284	33.7475
lyst	seurat_clusters5	1.43266	0.997833	591851	0.741571	2.58367e-64	3.21075e-61	68.2836	22.5655
pex5la	seurat_clusters5	2.73535	1.62797	623006	0.780608	8.30601e-64	9.90907e-61	89.9254	38.9859
hcn5	seurat_clusters5	1.56387	1.10046	584098	0.731856	1.33163e-63	1.52753e-60	65.2985	20.1813
tlr7.1	seurat_clusters5	1.12136	0.830139	567010	0.710446	1.90656e-63	2.10604e-60	56.7164	15.2451
TENM2	seurat_clusters5	3.34468	1.94568	619184	0.775819	2.29883e-61	2.36422e-58	89.9254	39.5232
atp8a2	seurat_clusters5	2.57043	1.42548	622676	0.780193	1.44818e-59	1.43973e-56	93.6567	45.9369
slit2	seurat_clusters5	1.52941	1.0401	585057	0.733059	3.75077e-57	3.6086e-54	67.1642	24.7817
strc	seurat_clusters5	2.88117	1.54384	618907	0.775472	1.88013e-56	1.69924e-53	94.7761	48.724
stk17al	seurat_clusters5	0.825887	0.636685	536394	0.672086	1.87455e-56	1.69924e-53	44.7761	10.4768
slc17a8	seurat_clusters5	2.63925	1.45421	615157	0.770773	5.76854e-56	5.06019e-53	92.1642	45.5675
galnt18a	seurat_clusters5	0.743379	0.59393	519276	0.650636	6.85045e-56	5.83756e-53	37.6866	7.45467
slc6a15	seurat_clusters5	1.45308	0.956406	587246	0.735801	8.88167e-56	7.35821e-53	70.1493	26.7965
gria4a	seurat_clusters5	1.12154	0.818004	556304	0.697033	2.81626e-55	2.27014e-52	54.1045	15.7488
arfgef1	seurat_clusters5	2.20168	1.20101	613686	0.76893	3.69918e-55	2.90337e-52	90.2985	45.9033
kcnd1	seurat_clusters5	0.915633	0.712072	523330	0.655717	6.26202e-55	4.78884e-52	39.5522	8.36132
tmcc3	seurat_clusters5	1.17948	0.842271	564176	0.706895	1.34707e-54	1.00441e-51	58.209	18.5024
zgc:153867	seurat_clusters5	1.2899	0.869847	571824	0.716477	3.81208e-54	2.77306e-51	63.806	21.3566
osbpl3b	seurat_clusters5	1.70716	1.05611	591046	0.740562	2.45996e-53	1.74686e-50	75	31.1283
si:dkey-96l17.6	seurat_clusters5	1.12337	0.766646	566082	0.709283	3.00271e-53	2.08269e-50	61.194	19.812
si:ch211-286b4.4	seurat_clusters5	2.25119	1.21799	608190	0.762044	4.67978e-53	3.17215e-50	92.5373	44.2915
dachd	seurat_clusters5	1.8421	1.09691	594974	0.745484	1.13203e-52	7.50285e-50	80.2239	34.2176
adcy8	seurat_clusters5	0.830318	0.619656	533514	0.668477	2.75362e-52	1.78537e-49	45.1493	11.0813
si:dkey-205h13.1	seurat_clusters5	2.75426	1.37524	611522	0.766218	2.44295e-51	1.55023e-48	96.6418	53.358
dscama	seurat_clusters5	0.987643	0.707701	544516	0.682262	8.26335e-51	5.13447e-48	50.7463	14.3721
rimbp2.1	seurat_clusters5	1.28818	0.850162	566685	0.710039	1.00571e-50	6.1215e-48	63.4328	21.6588
pvalb9	seurat_clusters5	2.72713	1.54987	597340	0.748448	1.68488e-50	1.00503e-47	83.9552	39.3553
atp6v0a1a	seurat_clusters5	1.51928	0.935539	585440	0.733538	5.27449e-50	3.08454e-47	72.0149	31.867
RAMP1	seurat_clusters5	1.37767	0.900429	573759	0.718903	5.99695e-50	3.4396e-47	66.4179	25.4869
cyth1a.1	seurat_clusters5	1.34821	0.866295	569866	0.714025	2.83487e-49	1.56574e-46	66.791	24.0766
si:dkey-18a10.3	seurat_clusters5	0.791879	0.607479	524964	0.657764	9.09189e-49	4.93028e-46	41.4179	10.4097
ptprga	seurat_clusters5	2.59293	1.28371	598558	0.749976	1.01867e-46	5.33017e-44	89.9254	49.4291
CABZ01080568.1	seurat_clusters5	2.01949	1.17336	580872	0.727816	3.05639e-46	1.57167e-43	75.3731	33.6467
cep126	seurat_clusters5	0.738197	0.548503	524804	0.657563	7.17269e-46	3.62586e-43	42.5373	11.3499
stc2a	seurat_clusters5	1.13956	0.7653	553478	0.69349	3.57554e-45	1.7482e-42	57.4627	20.6179
dgkza	seurat_clusters5	1.27142	0.829126	555613	0.696166	1.50965e-44	7.26214e-42	60.8209	21.8267
palld	seurat_clusters5	1.95938	1.06144	585190	0.733226	1.71073e-44	8.09881e-42	84.3284	39.7918
sgip1a	seurat_clusters5	2.45264	1.13262	596750	0.74771	4.05673e-44	1.8905e-41	94.0299	56.1451
abhd2b	seurat_clusters5	0.856215	0.591895	534100	0.669212	2.22972e-43	1.0231e-40	48.8806	14.9093
ptprn2	seurat_clusters5	0.809421	0.609681	514494	0.644645	2.98593e-43	1.34932e-40	38.4328	9.90598
laptm4b	seurat_clusters5	2.6507	1.2094	594274	0.744607	3.4009e-43	1.51391e-40	92.9104	55.6078
sema5ba	seurat_clusters5	1.66028	1.04148	556074	0.696743	3.99554e-43	1.75246e-40	62.6866	23.2035
bhlhe40	seurat_clusters5	1.23174	0.787501	556044	0.696706	4.4812e-43	1.93698e-40	60.8209	23.405
prkag2a	seurat_clusters5	1.47212	0.879288	565421	0.708455	5.42566e-43	2.31172e-40	69.7761	28.039
tecpr1b	seurat_clusters5	1.21414	0.74784	560519	0.702313	5.94346e-43	2.49667e-40	64.9254	25.5876
hsp70l	seurat_clusters5	3.3694	1.53881	591010	0.740518	7.92415e-42	3.28247e-39	92.1642	55.6414
hsp70.2	seurat_clusters5	2.91956	1.48083	581826	0.729011	9.40301e-42	3.84171e-39	83.209	42.8475
dock3	seurat_clusters5	1.35827	0.84146	556346	0.697085	1.11678e-41	4.50106e-39	63.4328	24.7817
iqsec1b	seurat_clusters5	3.05827	1.20708	594456	0.744836	1.75469e-41	6.97783e-39	98.1343	66.8234
adgrl1a	seurat_clusters5	1.52368	0.911772	556354	0.697095	3.12221e-41	1.22526e-38	65.6716	25.0839
AL929216.1	seurat_clusters5	0.922552	0.687082	513864	0.643857	4.3531e-41	1.68612e-38	38.806	10.544
prkcab	seurat_clusters5	1.24855	0.795657	549638	0.68868	5.00271e-41	1.9129e-38	59.3284	22.2633
tmem178b	seurat_clusters5	1.48501	0.89544	557768	0.698866	7.97085e-41	3.00925e-38	65.6716	26.3936
tmc5	seurat_clusters5	1.92778	1.04478	577066	0.723047	8.1496e-41	3.03827e-38	80.9701	40.1612
prkcea	seurat_clusters5	1.46376	0.841756	565724	0.708834	9.78072e-41	3.60136e-38	72.0149	31.229
kif13ba	seurat_clusters5	1.61825	0.879196	572470	0.717288	4.11891e-40	1.49813e-37	77.9851	37.4412
CABZ01069040.1	seurat_clusters5	0.903287	0.617669	528470	0.662157	4.93415e-40	1.77303e-37	47.7612	14.9765
fam184a	seurat_clusters5	1.4968	0.865571	562138	0.704341	5.64143e-40	2.00304e-37	70.8955	29.9194
pdcd4b	seurat_clusters5	2.16513	1.12355	577062	0.723042	1.34188e-39	4.70841e-37	80.2239	43.3848
mtus1a	seurat_clusters5	1.71321	0.902587	573798	0.718951	2.36364e-39	8.19714e-37	79.1045	40.4298
pvalb8	seurat_clusters5	1.72644	0.999898	560534	0.702333	3.003e-39	1.02948e-36	69.403	30.0201
frmd3	seurat_clusters5	1.39273	0.82934	555756	0.696345	5.78499e-39	1.91708e-36	64.9254	27.6024
slc4a8	seurat_clusters5	0.819657	0.563364	520980	0.652771	1.00781e-38	3.30306e-36	44.403	13.3983
si:dkey-26c10.5	seurat_clusters5	0.884147	0.595913	528458	0.662142	4.75838e-38	1.5426e-35	48.1343	16.2525
efr3a	seurat_clusters5	1.1342	0.691707	544804	0.682623	7.01991e-38	2.25128e-35	60.0746	22.9013
tjap1	seurat_clusters5	2.09727	0.989763	578449	0.724779	8.1253e-38	2.57805e-35	88.4328	50.7723
IQSEC1	seurat_clusters5	1.16691	0.702697	546502	0.68475	8.70588e-38	2.73319e-35	61.5672	23.8079
kiaa1549la	seurat_clusters5	0.735477	0.550835	509669	0.6386	9.62658e-38	2.99076e-35	37.6866	10.8798
gltpa	seurat_clusters5	0.943924	0.621144	529118	0.662969	1.387e-37	4.22114e-35	49.6269	16.7226
per3	seurat_clusters5	1.85929	0.921362	574222	0.719482	1.71439e-37	5.16481e-35	84.3284	45.8697
per1b	seurat_clusters5	1.37829	0.777558	559780	0.701387	2.82701e-37	8.43155e-35	69.7761	32.7065
si:ch211-132b12.7	seurat_clusters5	1.22508	0.733392	549358	0.688329	6.11487e-37	1.8057e-34	62.3134	26.4943
hsp70.1	seurat_clusters5	2.59941	1.21332	575386	0.720941	1.11626e-36	3.26397e-34	86.194	50.6044
hsp90aa1.2	seurat_clusters5	3.66843	1.35233	581490	0.728589	3.11944e-36	8.8607e-34	94.403	68.8717
mctp1a	seurat_clusters5	2.11923	1.02279	571420	0.715971	4.01637e-36	1.13008e-33	84.7015	46.6756
cacnb3b	seurat_clusters5	1.72602	0.917394	561757	0.703864	4.64877e-36	1.29579e-33	76.4925	36.2995
mical2b	seurat_clusters5	1.68289	0.843881	565568	0.708639	1.32566e-35	3.66089e-33	80.9701	41.0678
BX294434.1	seurat_clusters5	1.20402	0.703316	545330	0.683283	1.63796e-35	4.48184e-33	63.0597	25.8227
si:dkey-11c5.11	seurat_clusters5	1.19753	0.709435	540501	0.677231	2.23654e-35	6.06407e-33	59.7015	23.405
nptna	seurat_clusters5	2.49589	1.03641	574522	0.719859	7.61041e-35	2.02661e-32	94.0299	57.9248
camta1b	seurat_clusters5	0.821177	0.57056	505859	0.633826	1.05699e-34	2.76533e-32	38.0597	11.1484
mlf1	seurat_clusters5	1.15312	0.704151	537920	0.673997	1.17467e-34	3.04647e-32	56.7164	23.0692
zgc:113162	seurat_clusters5	1.22211	0.708833	544026	0.681648	1.26263e-34	3.24638e-32	63.0597	26.2257
fam160a1a	seurat_clusters5	1.44186	0.785178	553338	0.693316	2.39723e-34	6.11088e-32	69.7761	32.9752
ccdc105	seurat_clusters5	0.915543	0.600665	521900	0.653925	2.48115e-34	6.27122e-32	47.0149	16.454
b4galt2	seurat_clusters5	1.91499	0.962493	560748	0.702601	1.10982e-33	2.75838e-31	77.9851	41.3029
far1	seurat_clusters5	1.00423	0.609319	530428	0.664611	1.76058e-33	4.33962e-31	54.1045	20.5843
atp2b1a	seurat_clusters5	2.88233	1.03725	572901	0.717828	3.46136e-33	8.46189e-31	96.6418	67.0248
tmc2a	seurat_clusters5	2.14694	1.10225	555382	0.695877	6.08018e-33	1.47432e-30	75.3731	37.6091
arg2	seurat_clusters5	1.40736	0.76345	548703	0.687508	7.79713e-33	1.8754e-30	68.2836	32.2364
si:ch73-21k16.1	seurat_clusters5	0.808392	0.535554	516347	0.646967	1.14943e-32	2.72077e-30	44.403	15.6817
sdk1a	seurat_clusters5	1.73966	0.875201	555742	0.696328	1.61363e-32	3.73073e-30	76.8657	39.0195
cabp1b	seurat_clusters5	2.26274	1.109	557532	0.698571	2.33658e-32	5.36065e-30	81.3433	41.2021
calm3a	seurat_clusters5	2.82808	1.15268	567978	0.711659	2.71752e-32	6.18703e-30	92.9104	58.9657
fbrsl1	seurat_clusters5	1.78201	0.852288	559296	0.70078	3.85511e-32	8.7105e-30	80.2239	44.3586
inpp4ab	seurat_clusters5	0.809801	0.542829	509599	0.638512	4.36567e-32	9.78994e-30	41.4179	13.7005
osbpl1a	seurat_clusters5	1.90624	0.894894	559657	0.701233	6.61434e-32	1.47218e-29	83.5821	45.4668
bag3	seurat_clusters5	1.3575	0.78591	534188	0.669321	1.19254e-31	2.63462e-29	58.5821	24.5803
nfasca	seurat_clusters5	1.76059	0.836613	557168	0.698114	1.39068e-31	3.04978e-29	83.209	43.1833
kcnq1.2	seurat_clusters5	0.802047	0.530345	510532	0.639682	1.63889e-31	3.56787e-29	42.5373	14.3721
ehbp1	seurat_clusters5	1.41771	0.748258	547736	0.686297	2.23562e-31	4.79694e-29	70.5224	34.3519
atp1a3b	seurat_clusters5	2.92535	1.14827	565904	0.70906	2.4036e-31	5.12053e-29	94.403	60.4768
ptprnb	seurat_clusters5	0.938437	0.582188	520468	0.652131	4.03624e-31	8.47753e-29	49.2537	18.4688
pbx3b	seurat_clusters5	2.85261	1.04715	566142	0.709358	8.27842e-31	1.71461e-28	93.6567	66.9913
tmbim1b	seurat_clusters5	1.13708	0.646234	536292	0.671958	1.3624e-30	2.80232e-28	60.0746	27.5017
galnt9	seurat_clusters5	1.47474	0.831964	537392	0.673336	1.78207e-30	3.59124e-28	60.8209	28.4419
hdac5	seurat_clusters5	0.888817	0.534297	520207	0.651804	2.39666e-30	4.79733e-28	50.3731	19.0396
nfixb	seurat_clusters5	2.68968	1.14099	560026	0.701696	2.87365e-30	5.67592e-28	89.9254	53.5594
cfap298	seurat_clusters5	0.943572	0.568976	526570	0.659776	6.30433e-30	1.22095e-27	53.3582	22.767
shisal1a	seurat_clusters5	0.829638	0.532521	509852	0.638829	1.60266e-29	3.08382e-27	43.2836	15.6145
dnah5	seurat_clusters5	2.42473	1.01493	558714	0.700052	1.63065e-29	3.11757e-27	93.6567	55.1377
dnajb2	seurat_clusters5	0.92633	0.553198	520158	0.651742	1.7624e-29	3.348e-27	50.7463	19.9463
cry2	seurat_clusters5	1.22742	0.655718	537290	0.673208	1.91241e-29	3.60997e-27	64.5522	29.9866
unc5a	seurat_clusters5	1.81283	0.921801	542550	0.679799	1.95677e-29	3.67048e-27	70.1493	34.1504
aplp1	seurat_clusters5	1.57078	0.783343	544398	0.682114	2.69227e-29	5.01855e-27	74.6269	35.9637
bcl2a	seurat_clusters5	1.45109	0.738344	539768	0.676313	3.39438e-29	6.28803e-27	69.7761	32.1692
grinaa	seurat_clusters5	0.786319	0.500534	507818	0.63628	4.79371e-29	8.7713e-27	42.5373	15.2116
tspan13b	seurat_clusters5	1.95972	0.879683	552640	0.692442	5.25386e-29	9.55465e-27	82.0896	47.0114
pcsk5a	seurat_clusters5	2.14184	0.901535	556216	0.696921	5.41769e-29	9.79288e-27	88.806	53.2572
pcdh17	seurat_clusters5	1.89595	0.930647	545768	0.683831	5.8317e-29	1.04777e-26	71.2687	38.7508
ncam1b	seurat_clusters5	2.60181	1.09848	556129	0.696813	6.70892e-29	1.19816e-26	89.9254	53.5594
grid2ipb	seurat_clusters5	1.02692	0.582737	524477	0.657154	6.91706e-29	1.22798e-26	55.2239	22.767
erich3	seurat_clusters5	1.15643	0.630312	534078	0.669184	9.21179e-29	1.62569e-26	61.5672	29.0463
snap91b	seurat_clusters5	0.849884	0.519152	514064	0.644107	1.10383e-28	1.93657e-26	47.3881	17.9987
samd10b	seurat_clusters5	0.816645	0.551923	495704	0.621101	2.10182e-28	3.64458e-26	35.8209	11.5514
pde1a	seurat_clusters5	1.24756	0.710916	524095	0.656675	2.14754e-28	3.68106e-26	54.8507	23.2707
si:ch211-117c9.5	seurat_clusters5	0.959115	0.568815	522554	0.654745	2.30159e-28	3.92256e-26	51.8657	22.6326
gal3st1a	seurat_clusters5	1.4875	0.741496	542723	0.680015	2.38392e-28	4.0398e-26	70.5224	37.2398
RIMS2	seurat_clusters5	1.38308	0.723994	532911	0.667721	3.53127e-28	5.9503e-26	64.5522	29.0128
eps8l2	seurat_clusters5	1.24315	0.67053	533524	0.66849	4.61053e-28	7.72522e-26	61.9403	29.9866
smap1	seurat_clusters5	1.91307	0.82984	551632	0.691179	4.72181e-28	7.86748e-26	86.194	49.6642
ppp1r9a	seurat_clusters5	0.903054	0.517414	518912	0.650181	5.41104e-28	8.9658e-26	52.2388	20.9537
ccdc149a	seurat_clusters5	0.872619	0.508645	516792	0.647524	5.54265e-28	9.13313e-26	50.7463	19.9127
foxj1a	seurat_clusters5	1.49387	0.824093	534053	0.669152	5.89913e-28	9.66712e-26	61.194	30.7253
usp2a	seurat_clusters5	1.60645	0.75456	545880	0.683972	6.51184e-28	1.05552e-25	76.1194	42.0416
scg3	seurat_clusters5	1.48757	0.75747	540194	0.676847	9.35369e-28	1.49986e-25	67.1642	36.5346
ncanb	seurat_clusters5	1.81076	0.834969	545584	0.6836	1.05847e-27	1.68817e-25	79.4776	42.1424
si:ch211-38m6.6	seurat_clusters5	1.4824	0.703751	543706	0.681247	1.308e-27	2.07506e-25	75.3731	40.3627
ckmt1	seurat_clusters5	0.871895	0.528514	514801	0.64503	1.46153e-27	2.30635e-25	47.7612	19.6105
ubb	seurat_clusters5	1.32916	0.703228	529892	0.663939	2.0281e-27	3.18358e-25	62.3134	28.3412
calm1a	seurat_clusters5	1.55208	0.799072	533744	0.668764	2.7417e-27	4.23684e-25	66.0448	31.5312
magi3b	seurat_clusters5	1.72877	0.818777	542624	0.679891	3.18927e-27	4.90309e-25	77.6119	40.1612
synrg	seurat_clusters5	1.42799	0.674766	541174	0.678074	3.38781e-27	5.18161e-25	73.8806	38.7844
si:dkey-103g5.4	seurat_clusters5	1.52339	0.721009	538896	0.67522	6.82522e-27	1.03331e-24	75.3731	36.9711
BX537310.2	seurat_clusters5	1.20277	0.685051	520784	0.652526	8.79143e-27	1.32427e-24	53.3582	23.7408
satb1b	seurat_clusters5	1.07887	0.605604	520130	0.651706	9.54526e-27	1.42452e-24	53.7313	23.3378
fras1	seurat_clusters5	0.93072	0.526789	512121	0.641672	9.97339e-27	1.47988e-24	49.2537	19.0396
ank1a	seurat_clusters5	0.968289	0.546333	517067	0.647869	1.11531e-26	1.64674e-24	52.9851	21.5917
nrg3b	seurat_clusters5	1.52456	0.752231	534432	0.669628	1.5839e-26	2.32709e-24	69.0299	33.8482
hsph1	seurat_clusters5	1.20125	0.685299	516860	0.647609	1.60526e-26	2.33831e-24	51.4925	21.8267
hsd3b7	seurat_clusters5	1.2916	0.660561	531730	0.666241	2.0992e-26	3.01003e-24	64.5522	31.9678
elovl4b	seurat_clusters5	0.878004	0.508472	516632	0.647325	2.47566e-26	3.53286e-24	50.7463	22.0282
AP3B2	seurat_clusters5	1.52468	0.70373	540932	0.677771	3.38535e-26	4.78522e-24	78.3582	41.7394
hivep2a	seurat_clusters5	2.19734	0.89758	547893	0.686493	3.93839e-26	5.54068e-24	87.3134	53.6938
trim3b	seurat_clusters5	1.41001	0.699013	534548	0.669772	4.63775e-26	6.43354e-24	67.5373	35.4265
agrn	seurat_clusters5	3.10946	0.911551	553340	0.693319	5.02568e-26	6.91636e-24	97.7612	76.8637
uhrf1bp1l	seurat_clusters5	1.17936	0.610095	529346	0.663254	5.03219e-26	6.91636e-24	63.0597	30.8596
agbl4.1	seurat_clusters5	1.56829	0.770753	533148	0.668019	5.98917e-26	8.15648e-24	70.1493	34.0497
ptprq	seurat_clusters5	2.26311	0.938782	545470	0.683457	1.49382e-25	1.98898e-23	88.4328	52.0819
colq	seurat_clusters5	0.767375	0.509229	493910	0.618855	2.26889e-25	2.99424e-23	36.194	13.0289
mcf2la	seurat_clusters5	1.09902	0.593395	521074	0.65289	2.34006e-25	3.07455e-23	57.4627	26.0578
ctnna2	seurat_clusters5	0.981548	0.561386	504815	0.632518	2.49806e-25	3.26775e-23	45.5224	17.1927
sptlc2b	seurat_clusters5	1.50596	0.710924	536236	0.671887	2.53432e-25	3.3007e-23	72.3881	39.3889
spock3	seurat_clusters5	1.16499	0.608706	524643	0.657362	2.66834e-25	3.46014e-23	60.4478	28.7105
golga1	seurat_clusters5	0.949762	0.509042	519860	0.651369	3.77251e-25	4.87079e-23	56.3433	25.6548
CR925719.2	seurat_clusters5	0.950664	0.534439	513266	0.643107	4.09649e-25	5.26629e-23	51.1194	21.726
gnai1	seurat_clusters5	1.20148	0.596807	529958	0.664022	5.30697e-25	6.76412e-23	65.2985	33.9154
sbf1	seurat_clusters5	1.23363	0.603955	528032	0.661607	6.65436e-25	8.44538e-23	66.791	32.1357
syt14b	seurat_clusters5	1.13391	0.591662	522730	0.654965	7.9569e-25	1.00557e-22	59.3284	28.274
twf2b	seurat_clusters5	1.63364	0.746961	536085	0.671698	9.03493e-25	1.12748e-22	75.3731	41.0678
dmxl2	seurat_clusters5	1.17201	0.591538	525448	0.658371	1.18124e-24	1.46793e-22	63.0597	30.6917
BX005003.1	seurat_clusters5	1.98331	0.82008	541185	0.678088	1.89137e-24	2.331e-22	84.3284	50.5373
zgc:158463	seurat_clusters5	5.05108	1.60163	547216	0.685646	2.50903e-24	3.07949e-22	98.8806	71.2559
nfat5b	seurat_clusters5	1.04164	0.562605	513676	0.643621	4.02473e-24	4.8995e-22	53.3582	23.405
gal3st3	seurat_clusters5	2.04196	0.870699	537450	0.673408	8.40459e-24	1.00267e-21	76.8657	47.8173
ush2a	seurat_clusters5	2.19348	0.93834	537069	0.672931	9.73489e-24	1.1476e-21	82.8358	46.9443
zdhhc16b	seurat_clusters5	1.71827	0.780751	531775	0.666298	9.72124e-24	1.1476e-21	75.7463	39.3553
map3k5	seurat_clusters5	0.995673	0.524627	516513	0.647175	1.55331e-23	1.82392e-21	55.9701	26.36
dedd1	seurat_clusters5	2.15132	0.790857	541686	0.678716	1.89182e-23	2.20404e-21	89.9254	59.7381
ptbp1b	seurat_clusters5	2.01556	0.780658	539914	0.676495	2.58834e-23	3.00379e-21	86.9403	55.9436
s100s	seurat_clusters5	2.07089	1.02198	524340	0.656981	2.804e-23	3.24144e-21	63.806	33.3109
kif1aa	seurat_clusters5	2.72603	0.882132	541980	0.679084	6.83787e-23	7.75435e-21	95.8955	68.4688
cobl	seurat_clusters5	1.2097	0.583729	520540	0.652221	1.11182e-22	1.24741e-20	63.4328	31.2626
clstn2	seurat_clusters5	0.76491	0.507357	485002	0.607692	1.11253e-22	1.24741e-20	32.8358	11.9208
si:dkey-177p2.6	seurat_clusters5	1.24385	0.591755	524150	0.656744	1.60268e-22	1.79026e-20	64.9254	35.4265
CT027638.1	seurat_clusters5	4.00733	1.23035	540876	0.677702	1.93383e-22	2.1521e-20	98.1343	70.9537
sema7a	seurat_clusters5	0.989524	0.514451	513146	0.642956	1.96099e-22	2.17422e-20	55.597	26.0913
cd164l2	seurat_clusters5	1.50065	0.662089	528893	0.662687	2.17433e-22	2.38417e-20	74.6269	41.2021
MAGI3	seurat_clusters5	1.43452	0.675765	522010	0.654062	2.31079e-22	2.52451e-20	67.5373	33.3445
magi2a	seurat_clusters5	0.966192	0.521134	502852	0.630059	2.90946e-22	3.15544e-20	47.3881	19.9799
dnajc5b	seurat_clusters5	1.51778	0.670126	528339	0.661993	3.0562e-22	3.30258e-20	75.3731	41.0007
chsy1	seurat_clusters5	1.41071	0.674132	519766	0.65125	3.41849e-22	3.6675e-20	63.0597	31.9342
usp19	seurat_clusters5	1.00808	0.529695	513624	0.643555	3.7168e-22	3.95133e-20	55.2239	27.1323
eps8b	seurat_clusters5	0.991201	0.538768	508326	0.636916	4.19044e-22	4.41625e-20	50.7463	23.5729
kcnab2a	seurat_clusters5	2.34534	0.912527	534592	0.669828	6.64877e-22	6.95788e-20	91.0448	53.7273
hsp70.3	seurat_clusters5	2.15255	0.863914	532330	0.666993	7.27358e-22	7.58512e-20	77.6119	49.8993
xirp2b	seurat_clusters5	1.26854	0.607552	517306	0.648169	8.127e-22	8.44557e-20	61.9403	30.6917
prex1	seurat_clusters5	0.927229	0.509715	503480	0.630846	1.16517e-21	1.19832e-19	47.7612	21.323
btc	seurat_clusters5	1.20194	0.57976	518136	0.649209	2.49543e-21	2.49752e-19	61.9403	33.0087
gfi1aa	seurat_clusters5	1.69174	0.697399	528474	0.662161	2.82438e-21	2.79857e-19	76.8657	46.1719
ckbb	seurat_clusters5	2.40333	0.927874	531258	0.665649	4.32607e-21	4.25825e-19	87.3134	52.5185
ank3a	seurat_clusters5	1.0581	0.522054	511542	0.640947	5.71481e-21	5.58833e-19	57.0896	28.0725
si:ch211-195b15.8	seurat_clusters5	1.03551	0.522522	509982	0.638993	7.18184e-21	6.93199e-19	54.8507	27.1659
sh3glb2b	seurat_clusters5	1.09505	0.516005	516242	0.646835	7.1811e-21	6.93199e-19	61.9403	32.4715
ccdc102a	seurat_clusters5	1.20831	0.556484	516460	0.647109	8.89218e-21	8.52763e-19	63.806	32.8408
ppp1r15a	seurat_clusters5	1.29662	0.61262	516142	0.64671	1.00538e-20	9.58006e-19	61.9403	32.8408
ap3d1	seurat_clusters5	1.45912	0.611958	524104	0.656686	1.43023e-20	1.34989e-18	73.8806	42.8811
osbpl2b	seurat_clusters5	1.26485	0.595488	515140	0.645455	1.60971e-20	1.5145e-18	62.6866	32.3707
fam110b	seurat_clusters5	1.07177	0.530685	508066	0.636591	1.70897e-20	1.60284e-18	54.8507	26.4607
aldocb	seurat_clusters5	1.68397	0.684226	525974	0.659029	1.72094e-20	1.609e-18	75.3731	46.5077
camta1a	seurat_clusters5	1.00382	0.520158	501645	0.628546	1.96972e-20	1.83584e-18	49.6269	22.1289
si:ch211-218o21.4	seurat_clusters5	1.38973	0.61914	518930	0.650203	2.43167e-20	2.22468e-18	69.0299	36.904
pkma	seurat_clusters5	1.39351	0.612653	520770	0.65251	2.42472e-20	2.22468e-18	68.2836	39.456
cpeb4b	seurat_clusters5	2.04009	0.729384	530382	0.664552	2.48472e-20	2.26626e-18	86.194	57.5554
tnr	seurat_clusters5	0.903867	0.501306	495800	0.621222	3.65431e-20	3.30272e-18	43.6567	19.2747
gramd1bb	seurat_clusters5	1.32994	0.604649	516048	0.646592	3.80918e-20	3.43229e-18	65.2985	34.4527
fthl27	seurat_clusters5	1.25373	0.591002	510451	0.63958	6.39076e-20	5.7411e-18	59.7015	29.7179
kcnma1a	seurat_clusters5	2.67443	0.902564	530402	0.664577	6.93827e-20	6.21423e-18	92.9104	62.9617
dlg1	seurat_clusters5	2.28415	0.794734	529090	0.662934	7.72762e-20	6.90048e-18	86.5672	59.0329
irs2b	seurat_clusters5	1.07796	0.531184	507570	0.635969	1.09952e-19	9.73088e-18	55.597	28.039
sfswap	seurat_clusters5	1.49176	0.624946	520936	0.652716	1.11117e-19	9.80492e-18	73.1343	42.6125
casz1	seurat_clusters5	1.23374	0.573247	512508	0.642158	1.13678e-19	1.00013e-17	61.194	32.505
ptbp3	seurat_clusters5	2.50288	0.77678	530237	0.664371	1.30496e-19	1.14136e-17	92.9104	67.092
ush1c	seurat_clusters5	1.74212	0.707234	520385	0.652027	1.31235e-19	1.14447e-17	75.3731	41.9073
myo15aa	seurat_clusters5	1.90149	0.73594	523654	0.656123	2.84258e-19	2.4362e-17	84.7015	49.5635
rtn4rl2b	seurat_clusters5	1.13835	0.537902	509089	0.637873	2.93647e-19	2.50946e-17	58.9552	30.4567
galnt18b	seurat_clusters5	1.82119	0.725637	521048	0.652857	5.53135e-19	4.68672e-17	74.2537	47.0786
apba1a	seurat_clusters5	1.47888	0.613541	517819	0.648811	5.74291e-19	4.83848e-17	70.8955	41.6723
tnc	seurat_clusters5	1.73715	0.707045	519012	0.650307	6.4728e-19	5.4076e-17	77.9851	43.3512
fhod1	seurat_clusters5	1.09621	0.518053	506180	0.634229	1.14324e-18	9.47144e-17	57.8358	29.4829
dchs1b	seurat_clusters5	1.11521	0.515533	507236	0.635551	1.22871e-18	1.01513e-16	58.9552	30.5574
tmc2b	seurat_clusters5	1.3532	0.627967	509713	0.638655	1.42969e-18	1.17467e-16	59.7015	33.4453
tnrc6a	seurat_clusters5	1.27635	0.55512	513393	0.643266	1.47036e-18	1.20476e-16	64.9254	37.6763
prkcbb	seurat_clusters5	1.41643	0.595107	512877	0.642619	1.57242e-18	1.28135e-16	69.0299	36.7361
dnm2a	seurat_clusters5	1.61849	0.646227	518522	0.649692	1.65419e-18	1.34431e-16	75.7463	45.2653
espn	seurat_clusters5	2.00134	0.739031	522010	0.654062	2.1932e-18	1.75367e-16	85.4478	53.3915
auts2a	seurat_clusters5	2.69863	0.822827	525627	0.658595	2.51884e-18	2.00331e-16	93.6567	67.9315
cltca	seurat_clusters5	1.45021	0.590534	516044	0.646587	3.10959e-18	2.44706e-16	71.6418	42.8811
lrfn5a	seurat_clusters5	1.4671	0.637342	510631	0.639805	3.17624e-18	2.49293e-16	64.5522	35.5272
dnajb1b	seurat_clusters5	2.01421	0.755739	518772	0.650005	5.50219e-18	4.26241e-16	74.6269	49.8321
rab11fip3	seurat_clusters5	1.2977	0.560453	511102	0.640395	6.41134e-18	4.94104e-16	64.5522	37.542
hipk3b	seurat_clusters5	1.45502	0.613584	512904	0.642652	7.32462e-18	5.63033e-16	66.791	40.2955
march8	seurat_clusters5	1.3398	0.559439	511064	0.640347	9.61259e-18	7.27654e-16	67.5373	38.0792
ndst2b	seurat_clusters5	1.10961	0.510732	502150	0.629178	1.00461e-17	7.58543e-16	56.7164	28.5426
cabp2b	seurat_clusters5	1.4339	0.635083	501851	0.628804	1.02307e-17	7.70534e-16	56.7164	28.274
afdna	seurat_clusters5	2.47941	0.729875	523487	0.655913	1.13539e-17	8.50832e-16	95.8955	70.1478
UBB	seurat_clusters5	1.4838	0.591532	513910	0.643913	1.32526e-17	9.85682e-16	70.5224	43.1498
si:ch211-66k16.28	seurat_clusters5	1.11166	0.51753	501986	0.628973	1.66192e-17	1.2269e-15	57.0896	29.0463
hspa4a	seurat_clusters5	1.41567	0.586366	510374	0.639482	2.4766e-17	1.81486e-15	66.791	39.2545
otomp	seurat_clusters5	1.06913	0.52158	495606	0.620979	2.95557e-17	2.13438e-15	49.2537	24.5803
spsb4a	seurat_clusters5	1.78882	0.653769	516237	0.646829	3.98268e-17	2.82146e-15	78.7313	51.041
arid5b	seurat_clusters5	1.56231	0.622582	510604	0.639771	6.1533e-17	4.25805e-15	71.6418	41.4708
cacna2d2a	seurat_clusters5	1.52523	0.59641	509378	0.638234	8.36961e-17	5.69917e-15	72.0149	40.1948
gapdhs	seurat_clusters5	2.57809	0.790607	518688	0.6499	1.17395e-16	7.85044e-15	90.6716	65.3123
FP236822.2	seurat_clusters5	1.26171	0.544427	502317	0.629388	1.63152e-16	1.07417e-14	60.4478	32.7737
abca2	seurat_clusters5	1.1352	0.502222	501266	0.628071	1.69886e-16	1.11605e-14	58.209	31.7999
hbaa1	seurat_clusters5	1.21441	0.548906	499520	0.625884	1.93974e-16	1.27149e-14	56.7164	30.188
emb	seurat_clusters5	1.4646	0.571654	509038	0.63781	2.329e-16	1.51664e-14	71.2687	42.4782
ptpn13	seurat_clusters5	1.31306	0.52648	506795	0.634999	2.86105e-16	1.83902e-14	67.1642	39.5903
GARNL3	seurat_clusters5	1.28186	0.519012	504054	0.631564	3.35868e-16	2.14044e-14	66.0448	35.9637
zbtb20	seurat_clusters5	1.65137	0.626771	509300	0.638138	4.28467e-16	2.70742e-14	74.6269	44.5601
myo6b	seurat_clusters5	2.66563	0.876769	515972	0.646497	4.84906e-16	3.0383e-14	95.8955	63.4654
CABZ01077956.1	seurat_clusters5	1.53849	0.611832	506878	0.635103	4.98294e-16	3.11564e-14	72.3881	40.732
rfx2	seurat_clusters5	1.3218	0.531345	504323	0.631901	9.66618e-16	5.90766e-14	66.0448	38.8516
myo7aa	seurat_clusters5	1.27438	0.509357	503672	0.631086	1.0652e-15	6.49683e-14	66.0448	38.0792
ldlrad4a	seurat_clusters5	1.23838	0.522555	499829	0.626271	1.19153e-15	7.23776e-14	59.7015	33.5124
atp6v0ca	seurat_clusters5	1.31151	0.516791	504238	0.631795	2.10352e-15	1.25979e-13	66.791	40.732
cox8b	seurat_clusters5	1.22417	0.511989	498472	0.62457	3.14017e-15	1.86937e-13	59.7015	33.7139
atp1b2b	seurat_clusters5	2.31473	0.776134	509624	0.638543	6.32972e-15	3.68718e-13	88.0597	56.4137
plxna4	seurat_clusters5	2.10102	0.705237	508758	0.637458	7.73088e-15	4.47716e-13	88.0597	54.634
atp11a	seurat_clusters5	1.59569	0.565205	505176	0.63297	1.20886e-14	6.89374e-13	75.3731	47.8845
sik2b	seurat_clusters5	1.32801	0.507772	499242	0.625535	2.11562e-14	1.17502e-12	66.791	38.7844
otofb	seurat_clusters5	2.73945	0.804155	508698	0.637382	2.61937e-14	1.43872e-12	89.5522	63.5997
rtn4r	seurat_clusters5	1.20033	0.521506	488240	0.611749	4.34005e-14	2.3365e-12	51.8657	27.233
man1a1	seurat_clusters5	2.06814	0.658845	506112	0.634142	5.45422e-14	2.91006e-12	85.8209	58.227
pax2a	seurat_clusters5	1.82184	0.635746	502851	0.630057	6.63174e-14	3.50694e-12	77.6119	49.4963
akt3a	seurat_clusters5	2.15934	0.677459	504115	0.631641	1.46722e-13	7.49311e-12	86.5672	57.589
meis1b	seurat_clusters5	1.52129	0.546713	495480	0.620821	7.25795e-13	3.53707e-11	65.6716	43.4856
dscaml1	seurat_clusters5	1.71831	0.570911	495538	0.620895	1.77033e-12	8.22431e-11	76.1194	46.5077
bcas3	seurat_clusters5	1.93039	0.577611	498593	0.624722	2.50917e-12	1.15488e-10	83.209	57.824
gpx1b	seurat_clusters5	1.51687	0.527367	492656	0.617283	4.55687e-12	2.04374e-10	73.5075	44.1572
ndrg3b	seurat_clusters5	2.21198	0.642156	498336	0.624399	5.24171e-12	2.33683e-10	90.6716	63.2639
rbms3	seurat_clusters5	1.48145	0.510715	490182	0.614184	6.78467e-12	2.99339e-10	68.6567	40.8999
svila	seurat_clusters5	1.54475	0.517583	492169	0.616673	1.01558e-11	4.3962e-10	73.5075	46.7764
nrxn3b	seurat_clusters5	3.25942	0.980918	496412	0.621988	1.87971e-11	7.89612e-10	96.6418	67.7636
dock9b	seurat_clusters5	1.71846	0.541839	492290	0.616825	2.07083e-11	8.6502e-10	80.9701	50.5373
nrxn3a	seurat_clusters5	2.42316	0.74824	493938	0.61889	2.88275e-11	1.18754e-09	91.791	58.5628
cacna1da	seurat_clusters5	1.7174	0.564999	490428	0.614491	3.24162e-11	1.3317e-09	77.6119	47.9852
zmat4a	seurat_clusters5	1.62148	0.534164	486287	0.609303	7.40113e-11	2.87046e-09	71.2687	42.3103
col18a1a	seurat_clusters5	1.85104	0.517672	486388	0.609429	4.54565e-10	1.61014e-08	80.2239	52.7199
fosab	seurat_clusters5	3.01209	0.613965	488830	0.612488	7.28386e-10	2.5202e-08	88.806	73.3378
rsrp1	seurat_clusters5	2.55258	0.537212	487474	0.610789	1.41348e-09	4.6841e-08	93.2836	75.5205
sorcs2	seurat_clusters5	2.14256	0.53217	479960	0.601376	1.52167e-08	4.34897e-07	84.3284	60.3425
hspa8	seurat_clusters5	2.28617	0.554051	476606	0.597172	7.43937e-08	1.89317e-06	89.9254	64.3049
jun	seurat_clusters5	2.16176	0.536591	475273	0.595503	9.27924e-08	2.32566e-06	84.3284	59.5366
rbm24a	seurat_clusters5	2.72592	0.689813	470208	0.589157	8.93339e-07	1.84004e-05	97.0149	66.7898
lrba	seurat_clusters5	2.54666	0.537273	469384	0.588124	1.43597e-06	2.82879e-05	95.1493	74.1437
myo3b	seurat_clusters5	1.98121	0.536751	466596	0.584631	1.44044e-06	2.83573e-05	82.8358	52.6192
shank3a	seurat_clusters5	2.49955	0.523498	454778	0.569822	0.000118664	0.00150347	91.0448	67.1927

## Sheet: seurat_clusters6
feature	group	avgExpr	logFC	statistic	auc	pval	padj	pct_in	pct_out
tectb	seurat_clusters6	3.22021	3.06293	705687	0.890255	3.38779e-304	1.01041e-299	80.8271	5.97315
si:ch211-133n4.6	seurat_clusters6	2.82824	2.68797	662426	0.835678	3.25866e-237	4.85948e-233	70.3008	6.1745
stm	seurat_clusters6	3.60672	3.02048	712082	0.898322	1.53461e-172	1.52566e-168	89.8496	20.1678
slc43a2b	seurat_clusters6	1.05106	1.00144	554696	0.699774	2.15451e-156	1.60645e-152	42.1053	2.58389
cx30.3	seurat_clusters6	1.46149	1.35375	579022	0.730461	4.57413e-151	2.72847e-147	50	4.49664
otogl	seurat_clusters6	2.07762	1.84391	637889	0.804724	1.00213e-149	4.9814e-146	67.6692	11.0403
cd9b	seurat_clusters6	1.47981	1.31895	606322	0.764902	8.59738e-145	3.6631e-141	59.3985	7.51678
nr4a2b	seurat_clusters6	1.63187	1.47914	607503	0.766391	4.02294e-144	1.4998e-140	58.6466	7.81879
bricd5	seurat_clusters6	0.927518	0.878975	539588	0.680714	1.09733e-135	3.63642e-132	38.3459	2.55034
efhd1	seurat_clusters6	1.12238	1.01685	576246	0.726959	8.20581e-133	2.44738e-129	50	5.53691
cldnb	seurat_clusters6	1.74111	1.57084	597363	0.753599	5.67598e-132	1.53896e-128	56.015	7.91946
glula	seurat_clusters6	2.47748	2.06722	665031	0.838965	2.14349e-131	5.32748e-128	78.1955	19.4631
rasd4	seurat_clusters6	0.613881	0.594184	499797	0.630515	1.03207e-119	2.3678e-116	27.0677	1.04027
ptprz1b	seurat_clusters6	1.67749	1.40132	615031	0.775888	2.72327e-117	5.80153e-114	65.7895	12.2483
sparc	seurat_clusters6	2.02248	1.70415	623533	0.786614	2.17613e-112	4.32687e-109	66.5414	15.0671
tnn	seurat_clusters6	0.764908	0.717295	514895	0.649562	8.36617e-112	1.55951e-108	31.9549	2.08054
her4.1	seurat_clusters6	1.2202	1.10254	551862	0.696197	3.70115e-111	6.49333e-108	43.609	4.96644
aif1l	seurat_clusters6	1.221	1.0507	574416	0.724651	1.0898e-104	1.80575e-101	52.2556	8.15436
tecta	seurat_clusters6	1.54145	1.32973	576376	0.727123	6.25565e-104	9.81973e-101	52.6316	8.55705
epcam	seurat_clusters6	1.81389	1.49723	611371	0.771271	5.18382e-100	7.73037e-97	64.2857	15.5034
junba	seurat_clusters6	1.80808	1.50751	603078	0.76081	2.63692e-95	3.74505e-92	61.6541	14.9664
id1	seurat_clusters6	1.63401	1.3795	589988	0.744296	2.25511e-94	3.05721e-91	57.8947	12.4832
hey1	seurat_clusters6	1.11933	0.948956	556152	0.70161	1.15416e-90	1.43429e-87	47.7444	7.58389
igf2b	seurat_clusters6	0.653931	0.592948	514958	0.649641	2.24446e-90	2.67764e-87	33.0827	3.25503
slc25a22b	seurat_clusters6	1.14977	0.944441	561379	0.708204	1.36928e-89	1.57072e-86	50.7519	8.38926
thbs1b	seurat_clusters6	1.07388	0.930201	548588	0.692067	3.25242e-87	3.59272e-84	44.7368	7.11409
igfbp3	seurat_clusters6	1.09937	0.961206	540972	0.68246	4.8153e-87	5.12916e-84	42.1053	6.1745
mb	seurat_clusters6	3.09467	2.18304	657505	0.829471	1.12439e-86	1.15145e-83	83.4586	39.5973
BX248331.2	seurat_clusters6	1.14635	1.01972	544546	0.686969	1.1582e-86	1.15145e-83	42.4812	6.74497
gas2a	seurat_clusters6	0.966944	0.849726	528370	0.666562	1.27759e-85	1.22917e-82	37.9699	4.89933
slc1a3a	seurat_clusters6	2.11035	1.53295	627662	0.791822	7.45983e-83	6.7421e-80	75.188	27.0134
elovl2	seurat_clusters6	0.579709	0.530894	501018	0.632056	2.0298e-81	1.78055e-78	28.9474	2.75168
cst3	seurat_clusters6	0.811016	0.712184	531375	0.670352	5.39887e-81	4.60061e-78	39.0977	5.77181
zgc:112437	seurat_clusters6	0.670858	0.589225	512004	0.645915	8.0123e-81	6.63797e-78	33.0827	3.69128
zgc:92313	seurat_clusters6	0.693414	0.60321	520580	0.656735	9.84524e-78	7.52908e-75	36.0902	4.86577
cnn2	seurat_clusters6	0.54052	0.5001	490846	0.619223	1.14748e-77	8.55592e-75	25.9398	2.21477
mdkb	seurat_clusters6	0.847875	0.756686	525864	0.663399	1.20676e-75	8.77845e-73	37.218	5.80537
fxyd6l	seurat_clusters6	0.6479	0.571234	511376	0.645122	1.71023e-74	1.15926e-71	33.0827	4.22819
her4.2	seurat_clusters6	0.758688	0.674279	505744	0.638018	7.60387e-73	4.82522e-70	31.203	3.8255
phlda2	seurat_clusters6	0.884525	0.782578	519772	0.655714	1.07595e-71	6.41804e-69	35.7143	5.53691
fbln7	seurat_clusters6	0.612116	0.551493	495178	0.624688	2.43078e-70	1.42153e-67	27.8195	3.05369
zgc:158343	seurat_clusters6	0.775929	0.701616	503368	0.63502	8.53863e-70	4.8974e-67	30.4511	3.89262
her6	seurat_clusters6	1.37498	1.13871	550738	0.694779	1.8633e-69	1.04854e-66	47.7444	10.7047
fabp7a	seurat_clusters6	0.715834	0.624783	507326	0.640013	2.18616e-66	1.10512e-63	32.3308	4.66443
atp1a1a.4	seurat_clusters6	1.08495	0.862561	546656	0.689629	3.55293e-66	1.73715e-63	47.7444	10.6376
her9	seurat_clusters6	0.88991	0.767183	516028	0.650992	5.09177e-63	2.33634e-60	35.7143	6.24161
gadd45bb	seurat_clusters6	0.577934	0.52718	487170	0.614585	1.74004e-62	7.86316e-60	25.5639	2.98658
her15.1	seurat_clusters6	0.755558	0.663886	496356	0.626174	4.82226e-62	2.14662e-59	28.9474	3.92617
tmsb4x	seurat_clusters6	1.83723	1.33074	587819	0.741559	1.00916e-61	4.4262e-59	64.2857	24.4295
lfng	seurat_clusters6	0.986168	0.800321	529700	0.66824	1.30611e-61	5.64561e-59	41.7293	8.5906
angptl4	seurat_clusters6	1.0417	0.856879	534751	0.674611	1.03708e-58	4.29597e-56	43.2331	10.3356
atp1b1a	seurat_clusters6	1.77565	1.22986	588028	0.741822	3.29075e-56	1.2914e-53	65.0376	29.1275
igfbp1a	seurat_clusters6	0.621078	0.551322	482721	0.608973	4.93921e-56	1.91314e-53	24.812	3.12081
cd63	seurat_clusters6	0.685608	0.567472	509052	0.642191	4.64045e-55	1.75192e-52	34.5865	6.54362
btg2	seurat_clusters6	2.25163	1.36761	603158	0.76091	1.25895e-54	4.57903e-52	74.0602	41.1745
cldn7b	seurat_clusters6	0.859191	0.701442	517578	0.652947	9.49026e-54	3.29124e-51	37.9699	8.25503
id3	seurat_clusters6	0.67625	0.57081	500746	0.631713	4.36648e-53	1.46326e-50	31.5789	5.67114
slc16a1a	seurat_clusters6	0.613238	0.523103	488911	0.616782	6.46049e-53	2.11741e-50	27.4436	4.12752
si:ch73-335l21.4	seurat_clusters6	1.0221	0.864783	515494	0.650319	5.59246e-52	1.75574e-49	36.8421	8.3557
nr4a3	seurat_clusters6	1.84198	1.37668	557101	0.702807	1.52871e-51	4.7004e-49	55.2632	19.1946
fosl1a	seurat_clusters6	1.67314	1.22376	564532	0.712181	1.31266e-50	3.915e-48	57.8947	22.7852
nedd9	seurat_clusters6	1.31109	0.929434	544702	0.687165	6.90128e-48	1.82151e-45	52.6316	16.9463
egr1	seurat_clusters6	1.37984	1.06527	538115	0.678855	1.48899e-47	3.89553e-45	46.9925	15.302
col9a1a	seurat_clusters6	0.611667	0.510151	494278	0.623552	4.32363e-47	1.11166e-44	30.0752	5.77181
agr2	seurat_clusters6	1.08346	0.823894	535284	0.675283	5.98953e-47	1.52682e-44	46.2406	14.7315
prex2	seurat_clusters6	0.941947	0.73052	507228	0.63989	1.04864e-45	2.54275e-43	36.0902	8.28859
sdc4	seurat_clusters6	1.69344	1.11553	565588	0.713513	8.32526e-45	1.92481e-42	62.0301	28.6577
jag1b	seurat_clusters6	1.12792	0.793444	532277	0.67149	9.62529e-44	2.11084e-41	48.8722	15.2013
si:ch211-236l14.4	seurat_clusters6	0.790563	0.592918	509353	0.642571	1.8832e-43	4.01189e-41	37.9699	9.36242
cnn3a	seurat_clusters6	0.708081	0.569694	498907	0.629393	1.43527e-42	2.87295e-40	32.7068	7.58389
glulb	seurat_clusters6	1.0925	0.818323	529324	0.667766	5.77854e-41	1.08393e-38	45.1128	16.1409
spry4	seurat_clusters6	1.00244	0.743058	522242	0.658831	1.07224e-40	1.97405e-38	43.609	13.8926
ier2a	seurat_clusters6	0.784613	0.634475	500946	0.631965	1.826e-40	3.30063e-38	33.8346	8.62416
sox10	seurat_clusters6	0.734584	0.569112	503072	0.634647	6.42394e-40	1.12171e-37	35.3383	9.22819
eef1a1l1	seurat_clusters6	2.56095	1.365	574780	0.72511	2.165e-39	3.68978e-37	75.188	45.7718
tns1b	seurat_clusters6	1.20261	0.812786	526348	0.66401	3.15197e-39	5.31116e-37	48.4962	15.8389
eef1da	seurat_clusters6	0.945351	0.716458	515509	0.650337	1.17408e-37	1.87256e-35	40.6015	13.557
mcl1b	seurat_clusters6	0.883813	0.656501	513588	0.647913	1.45398e-36	2.24689e-34	40.6015	13.5235
cd81a	seurat_clusters6	1.09762	0.728224	527515	0.665483	4.04662e-36	6.15768e-34	50	18.557
rpl9	seurat_clusters6	1.65624	1.10634	538143	0.678891	7.04851e-35	9.86957e-33	53.3835	25.1007
tpm3	seurat_clusters6	0.701286	0.526884	491620	0.6202	1.03213e-34	1.41859e-32	32.3308	8.42282
fosl2	seurat_clusters6	0.847872	0.623737	502891	0.634419	1.91131e-34	2.55627e-32	37.218	11.4094
gli3	seurat_clusters6	0.97517	0.672483	509960	0.643336	3.1512e-34	4.15861e-32	41.7293	13.557
ucp2	seurat_clusters6	1.27282	0.805548	534494	0.674288	5.68373e-33	7.09277e-31	54.1353	25.3356
actb1	seurat_clusters6	1.88227	1.0914	550038	0.693896	1.39077e-32	1.67934e-30	62.0301	37.5839
bcam	seurat_clusters6	0.764102	0.54871	492483	0.621289	2.39261e-32	2.84301e-30	33.8346	9.5302
atf3	seurat_clusters6	1.10982	0.795698	511402	0.645155	3.29064e-32	3.84876e-30	41.7293	15.5369
si:dkey-1m11.6	seurat_clusters6	0.938598	0.657043	509332	0.642544	1.01651e-31	1.14838e-29	41.3534	15.1007
zgc:171772	seurat_clusters6	1.8403	1.2065	518940	0.654665	2.29494e-31	2.53506e-29	45.8647	19.3289
tuft1a	seurat_clusters6	0.94383	0.666796	509568	0.642843	3.67787e-31	4.03281e-29	41.3534	15.6376
rplp1	seurat_clusters6	2.90606	1.22781	558602	0.704701	4.61879e-30	4.73386e-28	77.8195	60.8054
ddit3	seurat_clusters6	0.722054	0.520767	494110	0.623342	8.05332e-30	8.11534e-28	34.9624	11.2752
btg1	seurat_clusters6	1.91566	0.946924	550987	0.695094	9.19297e-30	9.20068e-28	67.6692	47.4832
rps20	seurat_clusters6	1.79761	1.18862	515034	0.649738	1.79089e-29	1.78044e-27	45.1128	19.4295
xbp1	seurat_clusters6	1.61129	0.871994	542810	0.684778	1.89851e-29	1.87494e-27	61.2782	38.4899
ppap2d	seurat_clusters6	0.963148	0.599031	507180	0.639829	3.10277e-29	3.0341e-27	44.7368	15.9396
zgc:92242	seurat_clusters6	0.764629	0.524258	493062	0.62202	5.31779e-29	5.16622e-27	35.7143	11.3423
sema3fb	seurat_clusters6	1.23207	0.788638	511682	0.645509	2.1273e-28	1.99518e-26	45.8647	18.8255
rpl13	seurat_clusters6	2.09309	1.07619	543062	0.685096	4.70292e-28	4.32915e-26	64.6617	43.0872
grb10b	seurat_clusters6	0.806576	0.58258	492548	0.621371	1.93018e-27	1.71844e-25	34.9624	12.2483
CR383676.1	seurat_clusters6	2.7677	1.58048	511013	0.644665	4.30457e-27	3.74297e-25	46.9925	19.8993
sec61g	seurat_clusters6	1.60014	0.889462	531417	0.670405	1.34682e-26	1.13472e-24	56.7669	34.9329
gadd45ba	seurat_clusters6	1.57118	0.881085	528088	0.666206	1.62939e-26	1.36125e-24	57.8947	31.8792
nocta	seurat_clusters6	1.24096	0.752691	520168	0.656215	1.87746e-26	1.55542e-24	51.1278	26.2416
rps2	seurat_clusters6	2.28174	1.11453	540956	0.682439	2.29659e-26	1.89215e-24	68.0451	46.8121
rpl35	seurat_clusters6	2.07051	1.08677	536482	0.676795	3.36211e-26	2.75481e-24	62.0301	41.5101
kcnq5a	seurat_clusters6	2.95572	1.46454	541492	0.683116	4.64192e-26	3.73168e-24	71.4286	48.9933
nrarpa	seurat_clusters6	0.800407	0.554812	494234	0.623498	8.45192e-26	6.66875e-24	36.8421	14.0268
arhgap32a	seurat_clusters6	1.02201	0.658239	500459	0.631351	9.20193e-26	7.24136e-24	41.3534	16.4765
ppiaa	seurat_clusters6	1.3207	0.874035	512193	0.646154	1.04e-25	8.16264e-24	46.2406	22.5503
ezrb	seurat_clusters6	0.758895	0.517	491251	0.619734	1.77735e-25	1.37687e-23	36.0902	13.1208
sgk1	seurat_clusters6	0.818426	0.561948	497568	0.627704	1.7888e-25	1.38215e-23	38.3459	15.6711
pcxa	seurat_clusters6	1.73586	0.853395	535548	0.675618	1.99515e-25	1.53365e-23	66.5414	42.8859
tdh	seurat_clusters6	0.993191	0.614506	509132	0.642293	1.14387e-24	8.4237e-23	45.8647	22.2483
rpl24	seurat_clusters6	1.97559	1.05502	530864	0.669708	1.75897e-24	1.27643e-22	59.3985	40.906
si:ch211-222l21.1	seurat_clusters6	0.858133	0.550161	492070	0.620768	5.44276e-24	3.82854e-22	37.9699	14.6309
rpl12	seurat_clusters6	1.97924	0.98187	530168	0.66883	1.10717e-23	7.69727e-22	61.6541	43.0537
otog	seurat_clusters6	1.29586	0.683474	510556	0.644088	1.30296e-23	9.01643e-22	53.7594	24.2953
junbb	seurat_clusters6	1.08791	0.659637	507422	0.640134	6.21412e-23	4.17424e-21	46.9925	23.9262
zgc:114188	seurat_clusters6	0.917302	0.603884	488997	0.616891	2.35703e-22	1.51832e-20	36.4662	15
rpl39	seurat_clusters6	2.35803	1.08733	529799	0.668364	2.96298e-22	1.88827e-20	65.7895	49.6644
rpl18	seurat_clusters6	2.00526	0.966426	526392	0.664066	3.31887e-22	2.11056e-20	62.782	44.1611
rpl29	seurat_clusters6	1.90545	0.961318	522555	0.659226	7.77445e-22	4.81064e-20	58.2707	40.604
col11a1a	seurat_clusters6	1.04084	0.586938	496550	0.62642	1.06642e-21	6.50427e-20	44.7368	19.1275
nfkbiab	seurat_clusters6	0.870663	0.618855	487645	0.615185	1.16028e-21	7.04795e-20	34.9624	15.2349
rplp2l	seurat_clusters6	2.06493	1.03336	523068	0.659872	1.41775e-21	8.52508e-20	60.1504	42.349
actb2	seurat_clusters6	2.09366	0.824135	529146	0.667541	1.68174e-21	1.00316e-19	70.3008	53.255
socs3a	seurat_clusters6	1.38296	0.78706	508700	0.641746	2.95086e-21	1.73247e-19	50.7519	28.1544
rpl19	seurat_clusters6	2.13522	0.95091	525642	0.66312	4.06213e-21	2.34793e-19	64.2857	48.9262
rps27.1	seurat_clusters6	1.99854	0.941681	523126	0.659946	4.3372e-21	2.49724e-19	61.6541	44.7651
rps16	seurat_clusters6	1.90469	0.925202	521518	0.657917	4.54919e-21	2.60923e-19	59.7744	42.4832
rps23	seurat_clusters6	1.85016	0.886619	521162	0.657469	6.05441e-21	3.43294e-19	59.7744	42.5503
rps26	seurat_clusters6	1.61152	0.8639	513917	0.648328	8.37855e-21	4.67084e-19	53.3835	34.3289
ybx1	seurat_clusters6	1.64064	0.81593	516734	0.651882	9.68683e-21	5.3601e-19	56.015	37.651
rpl35a	seurat_clusters6	1.935	0.941645	519836	0.655795	1.3308e-20	7.25614e-19	58.6466	42.3154
rpl36	seurat_clusters6	2.12465	0.966821	521756	0.658218	3.857e-20	2.03963e-18	62.782	47.8523
myo5b	seurat_clusters6	1.12998	0.639384	500728	0.631691	4.15507e-20	2.18563e-18	46.9925	24.6309
ebf3a.1	seurat_clusters6	1.38577	0.911956	494203	0.623458	4.72309e-20	2.47133e-18	39.4737	20.7718
jdp2b	seurat_clusters6	2.15071	0.867122	521788	0.658257	1.06094e-19	5.42755e-18	68.4211	50.5369
rpl27	seurat_clusters6	1.83504	0.905109	516010	0.650968	1.22379e-19	6.2074e-18	57.1429	41.443
rps21	seurat_clusters6	1.98307	0.966534	516490	0.651575	2.07203e-19	1.02997e-17	58.2707	43.2886
rpl38	seurat_clusters6	1.99579	0.928492	517187	0.652454	2.47613e-19	1.22067e-17	59.7744	44.7651
rpl28	seurat_clusters6	1.96243	0.910565	516272	0.651299	3.30092e-19	1.60603e-17	59.3985	43.9597
rpl30	seurat_clusters6	1.74038	0.849878	513096	0.647293	3.4855e-19	1.68758e-17	56.391	39.4631
rps13	seurat_clusters6	1.86142	0.8654	515110	0.649833	4.48315e-19	2.15661e-17	58.2707	42.8859
rpl22	seurat_clusters6	1.6339	0.815485	509768	0.643094	1.11811e-18	5.25989e-17	54.1353	37.4161
rps14	seurat_clusters6	1.94872	0.860279	515557	0.650397	1.28536e-18	5.99936e-17	59.7744	46.2752
rps15a	seurat_clusters6	1.97928	0.980878	512528	0.646576	1.33036e-18	6.19002e-17	56.7669	41.4765
tnfrsfa	seurat_clusters6	0.945227	0.603085	477594	0.602505	1.42287e-18	6.59987e-17	33.0827	13.9933
nme2b.1	seurat_clusters6	1.61753	0.852707	507476	0.640203	1.4552e-18	6.72888e-17	51.5038	35.2349
rpl7	seurat_clusters6	1.84672	0.866821	512788	0.646905	1.57528e-18	7.27289e-17	58.2707	42.1477
rpl8	seurat_clusters6	1.90718	0.92236	512298	0.646287	1.84619e-18	8.45814e-17	57.5188	41.8121
rps18	seurat_clusters6	1.72545	0.809673	512244	0.646219	1.99774e-18	9.11051e-17	57.8947	41.8792
cirbpb	seurat_clusters6	1.59093	0.692915	512586	0.64665	2.07292e-18	9.43891e-17	59.7744	42.349
rps28	seurat_clusters6	1.99153	0.948039	512460	0.64649	2.41609e-18	1.09514e-16	57.8947	42.6846
rps10	seurat_clusters6	1.85178	0.819547	513160	0.647373	3.5721e-18	1.59012e-16	59.0226	44.7987
rpl23a	seurat_clusters6	1.49154	0.748797	506021	0.638367	3.95336e-18	1.75721e-16	52.6316	35.1007
ptmaa	seurat_clusters6	1.13843	0.662055	493148	0.622127	3.9594e-18	1.75728e-16	42.8571	23.5235
ier5	seurat_clusters6	0.984466	0.574666	492592	0.621427	5.17104e-18	2.27808e-16	42.8571	23.3557
rps4x	seurat_clusters6	1.84951	0.865973	510644	0.6442	7.10762e-18	3.08118e-16	57.1429	42.4497
rpl36a	seurat_clusters6	2.17268	0.895339	515378	0.650171	8.24462e-18	3.56371e-16	64.2857	51.6443
rpl5a	seurat_clusters6	1.12585	0.613389	495105	0.624596	9.13512e-18	3.93291e-16	45.8647	25.7383
rpl32	seurat_clusters6	2.12766	0.9061	514408	0.648947	9.3392e-18	4.01357e-16	62.782	49.9664
rassf7b	seurat_clusters6	1.27938	0.642609	502798	0.634301	1.05629e-17	4.51993e-16	53.0075	32.9195
fosab	seurat_clusters6	3.13193	0.744094	520368	0.656466	1.3559e-17	5.76063e-16	78.1955	74.2953
rpl11	seurat_clusters6	1.96109	0.913912	510280	0.64374	1.53064e-17	6.46621e-16	58.2707	43.7248
kremen1	seurat_clusters6	1.63761	0.769304	503669	0.6354	1.56949e-17	6.62092e-16	57.5188	34.2282
rps7	seurat_clusters6	1.9864	0.922012	509980	0.643362	1.81121e-17	7.60834e-16	58.2707	43.6577
rpl34	seurat_clusters6	1.98937	0.865471	512448	0.646476	2.04487e-17	8.51791e-16	60.9023	48.557
slc25a25a	seurat_clusters6	0.837016	0.50981	484596	0.611339	2.13479e-17	8.88006e-16	38.3459	19.2953
rpl10a	seurat_clusters6	1.82107	0.848199	508760	0.641823	2.27548e-17	9.41279e-16	56.7669	42.3154
rpl10	seurat_clusters6	1.79012	0.843299	507888	0.640723	2.47234e-17	1.01707e-15	56.015	41.1745
rsl24d1	seurat_clusters6	0.922392	0.545742	486666	0.61395	2.48866e-17	1.02237e-15	39.4737	20.7383
rps3a	seurat_clusters6	1.76452	0.813256	507494	0.640225	3.32939e-17	1.34188e-15	56.391	41.2416
rps24	seurat_clusters6	1.99038	0.846847	510665	0.644226	4.78361e-17	1.90482e-15	60.5263	47.6846
rps8a	seurat_clusters6	1.8834	0.820981	507844	0.640667	1.09988e-16	4.24922e-15	58.6466	44.8993
rpl18a	seurat_clusters6	1.79997	0.843766	505188	0.637317	1.18344e-16	4.56023e-15	55.6391	40.7718
rps5	seurat_clusters6	1.7524	0.803001	504986	0.637061	1.38387e-16	5.31881e-15	56.391	40.7718
rpl4	seurat_clusters6	1.26211	0.614487	498340	0.628677	1.67779e-16	6.41539e-15	50.7519	32.6174
faua	seurat_clusters6	1.70655	0.821461	503288	0.63492	1.70714e-16	6.51094e-15	54.1353	38.8591
mycb	seurat_clusters6	0.889322	0.544849	481972	0.608028	2.12084e-16	8.03738e-15	37.594	19.4966
rpl13a	seurat_clusters6	1.76276	0.743455	506693	0.639215	2.25158e-16	8.50042e-15	58.6466	44.8993
rpl15	seurat_clusters6	1.65804	0.770802	503236	0.634854	2.3152e-16	8.69659e-15	55.2632	39.396
adgrg6	seurat_clusters6	1.00967	0.553178	485564	0.612559	2.38611e-16	8.94042e-15	41.7293	21.8456
mt-co3	seurat_clusters6	1.83702	0.869847	487080	0.614472	3.11257e-16	1.15463e-14	48.1203	22.7517
rpl17	seurat_clusters6	1.8696	0.792914	506405	0.638852	3.33065e-16	1.22941e-14	59.0226	45.5369
rps27a	seurat_clusters6	1.87263	0.80521	505467	0.637668	4.74032e-16	1.71995e-14	58.2707	44.8993
h3f3d	seurat_clusters6	1.23925	0.636369	491244	0.619725	5.37687e-16	1.94147e-14	45.8647	27.3154
rpl14	seurat_clusters6	1.92523	0.686531	509006	0.642132	5.47686e-16	1.97518e-14	66.5414	52.7517
rps26l	seurat_clusters6	1.66815	0.737151	502470	0.633888	5.94413e-16	2.13338e-14	56.391	40.4362
rpl31	seurat_clusters6	1.86919	0.733075	507255	0.639924	6.45404e-16	2.31082e-14	60.9023	49.5302
tpt1	seurat_clusters6	1.72566	0.810468	501355	0.632481	1.2212e-15	4.32057e-14	54.5113	40.6711
rps9	seurat_clusters6	1.78765	0.807058	501544	0.63272	1.88096e-15	6.5384e-14	55.2632	42.1141
rack1	seurat_clusters6	1.56824	0.749027	498434	0.628796	2.00494e-15	6.929e-14	51.8797	37.6174
rpl23	seurat_clusters6	2.03903	0.849344	504415	0.636341	2.02453e-15	6.98862e-14	59.3985	47.5839
ppp1r10	seurat_clusters6	1.16945	0.553728	494628	0.623994	2.52764e-15	8.65521e-14	51.5038	33.0201
mt-co2	seurat_clusters6	1.91126	0.903665	484200	0.610839	3.24304e-15	1.09788e-13	47.7444	23.0537
rps3	seurat_clusters6	1.61623	0.708082	499885	0.630626	4.42243e-15	1.48535e-13	55.2632	41.6779
rpl5b	seurat_clusters6	1.03153	0.566596	483954	0.610529	8.04824e-15	2.6436e-13	41.3534	24.5302
prom1a	seurat_clusters6	1.05477	0.539249	480250	0.605856	1.00053e-14	3.26128e-13	41.7293	21.6107
rplp2	seurat_clusters6	2.00937	0.747761	502212	0.633562	2.52997e-14	7.97635e-13	61.6541	52.8523
eif1	seurat_clusters6	1.29221	0.576258	493498	0.62257	2.79203e-14	8.76549e-13	51.5038	36.6779
si:ch211-152c2.3	seurat_clusters6	1.3544	0.614311	493152	0.622132	2.79581e-14	8.76813e-13	51.1278	36.2081
higd1a	seurat_clusters6	1.08609	0.502009	490134	0.618325	3.81269e-14	1.17716e-12	50	32.8859
btf3	seurat_clusters6	1.2089	0.60013	487488	0.614987	3.8484e-14	1.18696e-12	45.8647	30.0671
ptmab	seurat_clusters6	1.57121	0.677553	493653	0.622765	3.90637e-14	1.20359e-12	53.7594	37.5503
si:ch211-80h18.1	seurat_clusters6	0.790877	0.559911	453232	0.571772	5.02257e-14	1.53168e-12	22.1805	8.69128
mt-atp6	seurat_clusters6	1.43555	0.608617	476808	0.601513	8.97375e-14	2.67108e-12	45.1128	21.0067
rpl3	seurat_clusters6	1.70611	0.698301	496456	0.626301	1.0206e-13	3.0138e-12	56.7669	45.302
rps6	seurat_clusters6	1.52654	0.720467	491286	0.619778	1.18215e-13	3.47708e-12	50.7519	37.047
rplp0	seurat_clusters6	1.96059	0.761187	497925	0.628154	1.25053e-13	3.66017e-12	60.5263	49.1946
jun	seurat_clusters6	2.30936	0.697008	501614	0.632808	1.35104e-13	3.95047e-12	69.9248	60.8389
cers2a	seurat_clusters6	0.970659	0.543981	476324	0.600903	1.70975e-13	4.95563e-12	38.3459	21.9799
eef1g	seurat_clusters6	1.36151	0.648075	486726	0.614026	2.10165e-13	6.02131e-12	47.3684	32.3154
tob1a	seurat_clusters6	1.383	0.551758	493350	0.622382	2.12679e-13	6.08165e-12	57.5188	41.6443
rps19	seurat_clusters6	1.98726	0.813772	494783	0.62419	4.04396e-13	1.13144e-11	56.7669	47.1141
rps29	seurat_clusters6	2.22328	0.795055	497400	0.627492	4.46642e-13	1.24264e-11	62.0301	54.2617
rpsa	seurat_clusters6	1.86148	0.74074	494248	0.623515	4.73061e-13	1.31492e-11	57.1429	46.5101
rps12	seurat_clusters6	1.73239	0.764345	491226	0.619703	5.12159e-13	1.41962e-11	53.0075	41.0067
rpl7a	seurat_clusters6	1.87018	0.714359	494096	0.623324	7.51698e-13	2.04556e-11	57.8947	48.1208
clstn1	seurat_clusters6	1.2483	0.514177	486708	0.614003	1.85601e-12	4.86857e-11	54.5113	37.047
cadm4	seurat_clusters6	1.7999	0.648668	489635	0.617696	2.87425e-12	7.38367e-11	63.9098	43.1208
ier2b	seurat_clusters6	1.38628	0.590481	485162	0.612052	9.27995e-12	2.27237e-10	53.0075	39.5973
rps11	seurat_clusters6	1.85046	0.589653	490120	0.618308	1.32394e-11	3.19988e-10	60.9023	52.2148
rps27.2	seurat_clusters6	1.3822	0.527747	484776	0.611566	1.62402e-11	3.89674e-10	53.0075	40.8725
rpl21	seurat_clusters6	1.76602	0.670318	486984	0.614352	1.88642e-11	4.48663e-10	55.2632	46.0738
sat1a.2	seurat_clusters6	1.1357	0.506052	476157	0.600693	1.37802e-10	3.00654e-09	47.7444	33.4899
rps25	seurat_clusters6	1.76687	0.603313	483805	0.610341	1.5546e-10	3.37207e-09	56.015	48.8591
eef1b2	seurat_clusters6	1.32321	0.554553	477407	0.60227	1.94447e-10	4.16622e-09	47.3684	36.6443
uba52	seurat_clusters6	1.71128	0.535506	482794	0.609065	3.18466e-10	6.72205e-09	58.6466	50.1007
naca	seurat_clusters6	1.41422	0.601703	475272	0.599576	7.85792e-10	1.58033e-08	46.9925	37.8523
mt-co1	seurat_clusters6	1.62343	0.583888	469691	0.592535	8.41798e-10	1.68501e-08	50	28.8926
rps15	seurat_clusters6	1.83411	0.584243	478300	0.603396	3.02141e-09	5.62858e-08	57.1429	51.7114
fosb	seurat_clusters6	1.97298	0.510695	466218	0.588154	5.40936e-07	7.49345e-06	65.0376	53.6913

## Sheet: seurat_clusters7
feature	group	avgExpr	logFC	statistic	auc	pval	padj	pct_in	pct_out
zpld1a	seurat_clusters7	2.75676	2.70162	460902	0.866962	0	0	74.5665	2.50569
chrna7	seurat_clusters7	0.839747	0.827141	360997	0.679039	5.55542e-179	8.28453e-175	36.4162	0.748454
slc1a2b	seurat_clusters7	1.08447	1.04431	387168	0.728266	2.88452e-170	2.86769e-166	47.3988	2.21282
zpld1b	seurat_clusters7	0.712255	0.70485	341728	0.642795	5.26783e-157	3.92783e-153	28.9017	0.390498
slc25a22b	seurat_clusters7	2.03585	1.85182	442054	0.831509	5.91913e-151	3.53076e-147	71.6763	8.49333
prex2	seurat_clusters7	1.95189	1.77521	429533	0.807956	2.33883e-144	1.16259e-140	67.052	7.38692
cbln20	seurat_clusters7	0.696156	0.682056	341002	0.641428	5.20378e-137	2.21718e-133	28.9017	0.65083
fgf24	seurat_clusters7	0.690261	0.672252	346488	0.651748	1.28287e-133	4.7827e-130	31.2139	0.943703
zgc:112437	seurat_clusters7	1.16707	1.09554	381198	0.717037	5.42892e-119	1.79908e-115	46.2428	3.8399
otog	seurat_clusters7	3.12017	2.58981	474484	0.89251	1.39803e-110	4.16963e-107	87.8613	23.2672
slc4a4a	seurat_clusters7	1.76288	1.57289	415384	0.781342	1.51496e-103	4.10762e-100	62.4277	9.82753
gas2a	seurat_clusters7	1.30702	1.18323	384044	0.722392	5.40188e-102	1.34259e-98	49.1329	5.27172
slc4a2a	seurat_clusters7	1.4833	1.31662	408698	0.768766	2.39456e-100	5.10127e-97	60.1156	9.07908
prom1b	seurat_clusters7	0.705247	0.673754	346124	0.651063	2.24023e-100	5.10127e-97	31.7919	1.82232
coch	seurat_clusters7	1.16064	1.05902	375090	0.705547	8.65826e-92	1.72155e-88	45.0867	5.07647
glula	seurat_clusters7	2.6689	2.20686	448743	0.844091	2.0643e-91	3.84798e-88	79.1908	21.1845
cd9b	seurat_clusters7	1.52576	1.32757	400528	0.753397	1.29814e-89	2.27747e-86	57.8035	9.1767
mtnr1aa	seurat_clusters7	0.59273	0.575468	323700	0.608883	4.98501e-88	8.25989e-85	22.5434	0.846079
cx30.3	seurat_clusters7	1.36248	1.2082	377308	0.70972	9.04764e-85	1.42024e-81	47.3988	6.02018
adamts18	seurat_clusters7	0.670217	0.636096	335342	0.630781	1.65878e-80	2.47366e-77	27.7457	1.82232
adcy2b	seurat_clusters7	0.868022	0.799375	353176	0.664328	7.70606e-80	1.09444e-76	35.8382	3.48194
cxcl14	seurat_clusters7	1.51531	1.34289	386837	0.727645	1.11098e-73	1.50613e-70	51.4451	9.33941
slc13a5a	seurat_clusters7	0.74571	0.688119	344721	0.648424	1.44697e-73	1.87635e-70	32.3699	3.02636
msx3	seurat_clusters7	0.603795	0.57201	333523	0.62736	1.63986e-72	1.95635e-69	27.1676	2.05011
chl1b	seurat_clusters7	1.34991	1.12846	381446	0.717504	2.32446e-71	2.66643e-68	52.0231	8.52587
atp1a1a.4	seurat_clusters7	1.44752	1.21944	393113	0.73945	1.22606e-70	1.35434e-67	56.6474	11.2594
cahz	seurat_clusters7	0.801532	0.740228	345816	0.650485	3.82054e-69	4.06955e-66	32.948	3.48194
arhgap32a	seurat_clusters7	1.71155	1.36667	407234	0.766013	7.59118e-68	7.80714e-65	65.3179	15.8802
mfng	seurat_clusters7	0.895937	0.795662	354199	0.666252	8.62078e-66	8.29403e-63	37.5723	4.84868
CR936442.1	seurat_clusters7	0.81559	0.766618	339300	0.638227	4.73828e-64	4.41622e-61	30.0578	3.15652
kremen1	seurat_clusters7	2.77513	1.94757	438880	0.825539	3.45223e-63	3.12008e-60	83.815	33.4527
ak5	seurat_clusters7	0.694839	0.645664	333716	0.627724	8.26839e-63	7.25308e-60	27.7457	2.63586
prom1a	seurat_clusters7	1.99794	1.5192	414226	0.779163	1.02765e-62	8.75703e-60	71.0983	20.5662
sema3fa	seurat_clusters7	1.06548	0.920947	366566	0.689514	1.4409e-62	1.19375e-59	43.9306	7.32184
lfng	seurat_clusters7	1.19503	0.996721	375786	0.706859	1.92572e-62	1.55229e-59	49.711	9.14416
zgc:153704	seurat_clusters7	0.925489	0.854672	342051	0.643402	1.26092e-59	9.17246e-57	31.7919	3.87244
cadm4	seurat_clusters7	3.15745	2.06301	442248	0.831872	1.64676e-58	1.16939e-55	87.8613	42.4016
myo18aa	seurat_clusters7	1.08922	0.936636	367454	0.691184	2.83151e-58	1.91931e-55	44.5087	8.33062
abcg4b	seurat_clusters7	0.556272	0.511259	327626	0.616268	2.4667e-57	1.63488e-54	25.4335	2.37553
CABZ01061591.1	seurat_clusters7	1.11774	0.933086	367891	0.692007	2.80974e-57	1.82175e-54	46.2428	8.55841
srgap3	seurat_clusters7	1.56289	1.20854	393502	0.740182	1.66951e-55	1.05943e-52	61.2717	16.1731
kcnq5a	seurat_clusters7	4.14173	2.67299	441018	0.82956	1.31913e-54	8.19646e-52	89.0173	48.6821
wnt7aa	seurat_clusters7	0.686661	0.610366	339004	0.637671	3.03994e-54	1.85033e-51	31.2139	4.0026
msi1	seurat_clusters7	1.20352	0.983648	372318	0.700334	5.48932e-53	3.27438e-50	49.1329	10.7062
fabp7a	seurat_clusters7	0.782345	0.67613	346334	0.651457	1.71973e-52	9.86366e-50	35.2601	5.3368
oc90	seurat_clusters7	0.646387	0.580385	327463	0.615962	1.3182e-49	7.28062e-47	26.0116	2.96128
mb	seurat_clusters7	2.93368	1.94691	425315	0.800022	5.1063e-49	2.76901e-46	78.6127	41.1975
ncam2	seurat_clusters7	2.15636	1.62272	391012	0.735499	5.67036e-47	2.86642e-44	61.2717	19.8178
hey1	seurat_clusters7	1.07405	0.87241	359092	0.675457	5.89651e-47	2.93106e-44	43.3526	9.04653
cntnap3	seurat_clusters7	1.89831	1.40287	399294	0.751076	7.37114e-47	3.60401e-44	64.7399	24.1132
aif1l	seurat_clusters7	1.10589	0.897314	361530	0.680041	3.81238e-46	1.83394e-43	44.5087	9.92515
tp53i11b	seurat_clusters7	0.797374	0.688002	341914	0.643143	1.85699e-45	8.52073e-43	33.526	5.7273
slc16a1a	seurat_clusters7	0.718849	0.618829	335530	0.631137	5.03849e-45	2.24288e-42	30.6358	4.65343
si:ch211-236l14.4	seurat_clusters7	1.03163	0.829611	359543	0.676304	1.61349e-44	7.0768e-42	43.9306	9.89261
qki2	seurat_clusters7	0.812033	0.676183	346035	0.650896	2.51381e-44	1.08659e-41	36.4162	6.73609
slc1a3a	seurat_clusters7	2.02872	1.40033	402791	0.757654	3.48173e-44	1.48347e-41	70.5202	28.7341
ebf3a.1	seurat_clusters7	2.0923	1.63066	386968	0.72789	1.07069e-43	4.49766e-41	56.6474	20.371
cd63	seurat_clusters7	0.812912	0.684769	346214	0.651233	3.35305e-42	1.33339e-39	36.4162	7.28929
fgfrl1a	seurat_clusters7	1.60891	1.18396	379909	0.714613	8.39937e-42	3.25339e-39	57.8035	18.1582
jag1b	seurat_clusters7	1.31742	0.969598	374274	0.704013	1.31215e-41	4.95379e-39	55.4913	15.8477
si:ch211-137a8.2	seurat_clusters7	0.72532	0.607051	339728	0.639031	2.03476e-41	7.58583e-39	33.526	6.05272
bmp7b	seurat_clusters7	0.835234	0.68869	343922	0.646921	4.74149e-41	1.74586e-38	35.8382	7.02896
adcy7	seurat_clusters7	0.775131	0.63585	344874	0.648712	7.30007e-41	2.65518e-38	36.4162	7.28929
col9a2	seurat_clusters7	1.02999	0.811553	360939	0.67893	1.09599e-40	3.89142e-38	45.6647	11.6824
tnfrsf19	seurat_clusters7	1.19515	0.952776	360148	0.677441	2.87303e-40	9.8492e-38	45.0867	11.6173
NPAS3	seurat_clusters7	1.38291	1.04946	366768	0.689895	5.00206e-39	1.60416e-36	49.711	14.481
prss23	seurat_clusters7	0.584138	0.509938	330332	0.621358	8.24735e-39	2.61678e-36	28.3237	4.7836
glis1b	seurat_clusters7	0.973596	0.775291	347186	0.653061	8.77642e-39	2.75534e-36	38.7283	8.3957
wnk4b	seurat_clusters7	0.978307	0.8242	346812	0.652357	9.47243e-39	2.94287e-36	36.9942	8.3957
efhd1	seurat_clusters7	0.814505	0.660873	343798	0.646688	1.57909e-38	4.80576e-36	36.4162	7.64725
stm	seurat_clusters7	2.19407	1.4369	384755	0.723728	5.80084e-38	1.74758e-35	68.2081	23.495
notch3	seurat_clusters7	0.977703	0.750486	354786	0.667355	8.23663e-38	2.45657e-35	43.9306	10.8689
thbs1b	seurat_clusters7	0.862171	0.67842	346546	0.651856	1.30973e-37	3.82968e-35	38.7283	8.59095
smad6b	seurat_clusters7	1.23637	0.91483	368691	0.693512	2.59035e-37	7.50071e-35	52.0231	16.2382
id1	seurat_clusters7	1.33234	1.0191	363825	0.684359	3.67944e-37	1.04513e-34	48.5549	14.3833
gna12a	seurat_clusters7	0.607655	0.516678	327987	0.616947	5.21533e-37	1.46743e-34	27.7457	4.65343
f3b	seurat_clusters7	0.657285	0.555085	327739	0.616481	6.68439e-37	1.8632e-34	27.7457	4.62089
sparc	seurat_clusters7	1.53071	1.13313	368822	0.693757	1.05601e-35	2.8121e-33	52.6012	17.4097
nlgn1	seurat_clusters7	1.46765	1.07631	367100	0.69052	1.93588e-35	5.0647e-33	51.4451	16.824
syne2b	seurat_clusters7	1.40605	1.00611	374852	0.705101	1.95294e-34	4.89466e-32	56.0694	21.6401
fxyd6l	seurat_clusters7	0.602299	0.505779	327956	0.61689	2.06082e-33	4.99707e-31	28.3237	5.36935
limch1b	seurat_clusters7	1.89121	1.12751	392806	0.738871	3.54519e-33	8.45883e-31	73.4104	37.5854
ppap2d	seurat_clusters7	1.25865	0.893039	362731	0.682301	4.31008e-33	1.02022e-30	51.4451	16.4335
bmp4	seurat_clusters7	0.645083	0.552151	328468	0.617851	5.52846e-33	1.28817e-30	28.3237	5.59714
epcam	seurat_clusters7	1.37301	0.98622	364519	0.685664	1.2005e-32	2.73321e-30	51.4451	17.7026
cyp27c1	seurat_clusters7	0.772058	0.650845	334966	0.630074	1.51469e-32	3.4224e-30	31.7919	7.25675
slc44a5b	seurat_clusters7	0.730383	0.605897	327540	0.616106	2.53645e-32	5.6455e-30	28.3237	5.53205
cst3	seurat_clusters7	0.666839	0.538337	334454	0.629111	2.7207e-32	6.01073e-30	32.3699	7.15913
ddr1	seurat_clusters7	0.72957	0.587689	334312	0.628844	4.58774e-32	1.0061e-29	32.3699	7.19167
igfbp3	seurat_clusters7	0.807953	0.624297	336106	0.63222	8.33996e-32	1.80246e-29	34.104	7.71233
fmnl3	seurat_clusters7	0.70076	0.564466	330848	0.622329	1.92884e-31	4.07999e-29	30.6358	6.5083
clstn1	seurat_clusters7	1.76204	1.04128	388004	0.729839	2.84911e-31	5.98414e-29	69.9422	36.7068
rin2	seurat_clusters7	0.719516	0.583143	331957	0.624415	1.38779e-30	2.85455e-28	31.2139	7.0615
ahcyl1	seurat_clusters7	1.23891	0.895861	365387	0.687297	1.57805e-30	3.22365e-28	51.4451	20.1757
egr1	seurat_clusters7	1.33046	0.980864	357854	0.673128	1.6017e-30	3.2497e-28	47.3988	16.2382
si:ch73-60h1.1	seurat_clusters7	0.606959	0.517135	324312	0.610034	1.9918e-30	4.01388e-28	26.5896	5.30426
znf536	seurat_clusters7	3.01489	1.46889	398375	0.749348	2.92904e-30	5.77175e-28	84.3931	58.3794
syt7b	seurat_clusters7	1.10361	0.834257	349057	0.65658	7.31457e-30	1.39844e-27	42.1965	12.8864
slc35f1	seurat_clusters7	0.644469	0.528529	322146	0.605961	1.01073e-29	1.89591e-27	26.0116	4.97885
cnn3a	seurat_clusters7	0.674424	0.516901	335110	0.630345	1.62287e-29	2.96946e-27	34.104	8.26554
epb41a	seurat_clusters7	0.838096	0.638327	341019	0.64146	2.47503e-29	4.50108e-27	37.5723	10.218
CU179643.1	seurat_clusters7	2.23937	1.31194	384691	0.723608	3.67585e-29	6.60434e-27	69.3642	38.1386
dlg2	seurat_clusters7	2.01864	1.22504	379476	0.713799	2.45903e-28	4.14353e-26	62.4277	34.4289
tmsb4x	seurat_clusters7	1.59053	1.02987	369766	0.695533	4.29396e-28	7.11486e-26	58.9595	25.9356
sorcs2	seurat_clusters7	2.78688	1.19631	390035	0.73366	1.82667e-26	2.7655e-24	78.6127	61.4058
gdpd5a	seurat_clusters7	0.725304	0.577699	330782	0.622206	1.97599e-26	2.96151e-24	31.2139	8.29808
col11a1a	seurat_clusters7	1.28863	0.83092	356948	0.671422	2.22026e-26	3.27818e-24	53.7572	19.3947
sema5ba	seurat_clusters7	1.71933	1.07165	364176	0.685018	4.2458e-26	6.23798e-24	58.3815	24.6664
nanos1	seurat_clusters7	0.73794	0.566529	333764	0.627814	1.12113e-24	1.49275e-22	34.104	10.1529
sept12	seurat_clusters7	0.854455	0.617493	334141	0.628523	1.16491e-24	1.54415e-22	35.8382	10.218
cd81a	seurat_clusters7	1.17334	0.786172	353496	0.664929	1.28291e-24	1.68559e-22	49.1329	19.5574
sox6	seurat_clusters7	1.46143	0.895247	356774	0.671097	8.38787e-24	1.04237e-21	56.0694	22.6489
map1ab	seurat_clusters7	0.657226	0.532455	323380	0.608281	2.40486e-23	2.90384e-21	27.7457	7.35438
junba	seurat_clusters7	1.17703	0.795313	346714	0.652172	4.2825e-23	5.02857e-21	45.6647	17.2795
dusp14	seurat_clusters7	0.720042	0.539617	331085	0.622775	6.04487e-23	7.04251e-21	33.526	10.1529
ctnnal1	seurat_clusters7	0.65384	0.50057	321603	0.604939	1.17226e-22	1.33956e-20	27.7457	7.0615
lmo7a	seurat_clusters7	0.725175	0.542039	331232	0.623052	1.21536e-22	1.38351e-20	33.526	10.4133
cdh1	seurat_clusters7	0.853306	0.615873	333461	0.627244	1.33176e-22	1.51026e-20	35.8382	11.2919
ptprz1b	seurat_clusters7	1.12413	0.774395	341490	0.642346	2.28624e-22	2.55382e-20	41.6185	15.2294
samd10b	seurat_clusters7	0.994838	0.723085	334670	0.629519	4.97872e-22	5.34138e-20	36.4162	12.2681
her6	seurat_clusters7	1.00294	0.711262	334376	0.628965	1.27459e-21	1.34804e-19	36.9942	12.4308
cdon	seurat_clusters7	1.02592	0.693798	343894	0.646868	2.17062e-21	2.23237e-19	43.9306	17.67
ext1b	seurat_clusters7	0.904796	0.624631	333182	0.62672	1.33085e-20	1.3014e-18	36.9942	12.7237
fat1a	seurat_clusters7	0.882334	0.562915	334760	0.629687	1.61214e-20	1.56619e-18	40.4624	13.4396
tpst1	seurat_clusters7	0.981896	0.685071	339937	0.639425	2.15773e-20	2.08943e-18	41.0405	16.5636
ccnd2a	seurat_clusters7	0.859085	0.59783	329450	0.619699	2.19723e-20	2.12079e-18	34.6821	11.1943
FP016248.1	seurat_clusters7	0.712127	0.521311	324608	0.610592	3.22173e-20	3.08965e-18	30.6358	9.37195
kitlga	seurat_clusters7	0.986076	0.6616	339692	0.638963	3.43831e-20	3.28678e-18	42.1965	16.5962
baiap2a	seurat_clusters7	0.732656	0.53036	322802	0.607195	5.17832e-20	4.85671e-18	30.0578	8.7862
mcl1b	seurat_clusters7	0.872902	0.625107	334992	0.630125	9.12288e-20	8.42383e-18	37.5723	14.5135
llgl2	seurat_clusters7	0.707926	0.5043	328802	0.618481	1.53139e-19	1.37987e-17	34.104	11.6173
abcg1	seurat_clusters7	0.829317	0.581795	331171	0.622936	6.67581e-19	5.70505e-17	35.8382	13.3746
tenm1	seurat_clusters7	0.708861	0.540264	319096	0.600222	7.40211e-19	6.27182e-17	27.1676	8.16791
myo9aa	seurat_clusters7	0.755894	0.516575	323296	0.608123	4.12316e-18	3.28806e-16	31.7919	10.2831
BX465834.1	seurat_clusters7	0.966227	0.595753	336409	0.632789	5.51505e-18	4.35149e-16	42.7746	17.4097
pard3bb	seurat_clusters7	1.28862	0.745794	339955	0.639459	8.45408e-18	6.58337e-16	49.1329	20.013
spry4	seurat_clusters7	0.842362	0.551475	331890	0.624289	1.12877e-17	8.69909e-16	38.7283	15.0667
socs3a	seurat_clusters7	1.4431	0.826766	348963	0.656403	1.20631e-17	9.27271e-16	53.7572	28.6691
CU639469.1	seurat_clusters7	0.88767	0.596261	331554	0.623657	1.46592e-17	1.11533e-15	37.5723	15.0667
dock1	seurat_clusters7	1.06831	0.662307	335248	0.630606	1.63817e-17	1.24321e-15	42.1965	17.3446
cldnb	seurat_clusters7	0.801979	0.531308	322891	0.607362	2.3487e-17	1.74253e-15	32.3699	10.7062
plch2a	seurat_clusters7	1.37957	0.749763	345556	0.649995	5.80844e-17	4.215e-15	54.9133	26.7816
erbb4b	seurat_clusters7	1.09662	0.711345	336168	0.632336	7.8951e-17	5.66037e-15	41.0405	19.232
sox5	seurat_clusters7	0.819196	0.536547	328878	0.618622	9.71588e-17	6.8505e-15	36.9942	14.481
nrarpa	seurat_clusters7	0.803093	0.540859	328905	0.618674	1.40129e-16	9.8107e-15	36.4162	14.7413
raraa	seurat_clusters7	1.42376	0.767634	347239	0.65316	6.542e-16	4.38461e-14	54.9133	32.3137
tenm4	seurat_clusters7	1.52473	0.811663	344744	0.648467	8.27358e-16	5.50086e-14	54.9133	29.4175
efna2a	seurat_clusters7	0.834997	0.52867	323118	0.607789	9.14948e-16	6.01064e-14	34.104	12.3658
pik3r2	seurat_clusters7	0.769578	0.513694	327279	0.615615	1.5224e-15	9.82803e-14	35.8382	15.1643
fndc3ba	seurat_clusters7	1.5927	0.798212	346303	0.6514	1.77364e-15	1.12074e-13	59.5376	32.4764
ucp2	seurat_clusters7	1.19443	0.698368	340678	0.640819	2.48457e-15	1.54702e-13	47.9769	26.5539
sipa1l3	seurat_clusters7	1.52945	0.760751	349136	0.656729	3.00227e-15	1.8616e-13	59.5376	38.041
fosl1a	seurat_clusters7	1.32655	0.820624	337523	0.634884	6.75581e-15	4.06234e-13	45.6647	24.5363
gpc5a	seurat_clusters7	0.827015	0.532072	325536	0.612336	2.13202e-14	1.2135e-12	35.2601	15.7826
pip5k1bb	seurat_clusters7	0.868997	0.576499	324552	0.610486	3.15961e-14	1.75159e-12	34.6821	15.3921
sorbs2b	seurat_clusters7	1.2887	0.69392	338807	0.6373	1.02855e-13	5.39129e-12	50.8671	29.7429
ndrg2	seurat_clusters7	0.878584	0.543621	327296	0.615648	1.38505e-13	7.17172e-12	38.7283	18.5161
pleca	seurat_clusters7	0.903576	0.545373	325698	0.612642	2.12547e-13	1.07365e-11	38.1503	17.6049
nfasca	seurat_clusters7	1.68251	0.728277	346703	0.652152	2.31798e-13	1.16191e-11	63.0058	45.5581
arhgap24	seurat_clusters7	0.894998	0.546543	322856	0.607296	3.39686e-13	1.65812e-11	35.8382	15.8802
spire1a	seurat_clusters7	1.10243	0.626748	331780	0.624082	5.89419e-13	2.83082e-11	43.3526	24.276
adarb1b	seurat_clusters7	1.88789	0.961991	341526	0.642414	8.40161e-13	3.97743e-11	53.1792	38.7244
arhgap21b	seurat_clusters7	1.13809	0.629022	332375	0.625201	1.18845e-12	5.5279e-11	45.6647	25.8705
nedd9	seurat_clusters7	0.972254	0.543389	324212	0.609846	2.79379e-12	1.25112e-10	39.8844	18.7439
agr2	seurat_clusters7	0.816447	0.516914	320841	0.603505	3.43228e-12	1.52106e-10	34.104	16.3684
fgf10a	seurat_clusters7	1.31107	0.645216	335142	0.630405	5.56043e-12	2.38962e-10	52.6012	32.2486
fat3a	seurat_clusters7	0.998429	0.565344	323898	0.609257	6.5374e-12	2.75782e-10	39.3064	19.4273
btg2	seurat_clusters7	1.61961	0.658621	337316	0.634494	5.00665e-11	1.91686e-09	61.2717	42.8897
ptprfb	seurat_clusters7	1.86977	0.668157	335910	0.631851	3.94531e-10	1.36984e-08	69.3642	48.5844
igsf11	seurat_clusters7	0.929642	0.532014	317072	0.596416	5.42184e-10	1.85869e-08	34.6821	18.4185
fosab	seurat_clusters7	3.08831	0.6755	339416	0.638444	6.11688e-10	2.07786e-08	82.659	74.1621
ptprub	seurat_clusters7	1.4506	0.6123	326940	0.614977	1.6033e-09	5.10334e-08	53.7572	32.9645
col2a1a	seurat_clusters7	0.938617	0.512452	314291	0.591185	8.65024e-09	2.49028e-07	35.8382	19.3947
ppp1r10	seurat_clusters7	1.14835	0.514682	324036	0.609515	1.0462e-08	2.97738e-07	48.5549	33.7455
xbp1	seurat_clusters7	1.2999	0.516684	324157	0.609743	4.24483e-08	1.11531e-06	51.4451	39.7332
ier2b	seurat_clusters7	1.36627	0.551478	322512	0.60665	1.07385e-07	2.67118e-06	50.8671	40.1237
klhl29	seurat_clusters7	1.04789	0.526286	311791	0.586482	4.42899e-07	1.00147e-05	36.4162	24.2434
actb1	seurat_clusters7	1.35598	0.502445	317356	0.596949	1.13168e-06	2.37693e-05	50.8671	38.9522
eef1a1l1	seurat_clusters7	1.84795	0.57055	318162	0.598467	2.55033e-06	4.91684e-05	61.2717	47.4455
rpl24	seurat_clusters7	1.51118	0.532537	316503	0.595346	2.62257e-06	5.04308e-05	52.6012	41.8484
rplp1	seurat_clusters7	2.29716	0.547479	318239	0.598611	6.98998e-06	0.000126054	67.6301	61.8939
CT027638.1	seurat_clusters7	3.43851	0.591474	316345	0.595048	2.09814e-05	0.000340463	83.237	72.6326
zgc:158463	seurat_clusters7	4.24834	0.704186	308492	0.580276	0.00032857	0.00384148	84.3931	72.9255

## Sheet: seurat_clusters8
feature	group	avgExpr	logFC	statistic	auc	pval	padj	pct_in	pct_out
scn5lab	seurat_clusters8	1.47052	1.40898	428045	0.809575	1.04349e-214	3.11222e-210	64.5349	3.61093
odf3l2b	seurat_clusters8	1.95345	1.79979	460776	0.871481	8.48627e-203	1.26551e-198	80.2326	6.99414
adam11	seurat_clusters8	2.49137	2.24611	487992	0.922954	2.10277e-184	2.09051e-180	91.2791	12.2642
thbs3b	seurat_clusters8	0.583582	0.573835	356508	0.674276	6.00681e-181	4.47882e-177	35.4651	0.618087
glis1b	seurat_clusters8	1.84492	1.69511	436708	0.82596	1.93158e-168	1.15219e-164	70.3488	6.6363
gpc3	seurat_clusters8	2.01849	1.84689	437918	0.828248	2.09465e-152	1.04121e-148	70.9302	8.06766
tbx1	seurat_clusters8	1.21067	1.08818	402789	0.761808	1.03642e-116	4.41587e-113	58.1395	6.57124
cabp5b	seurat_clusters8	1.50064	1.39286	375323	0.70986	3.26643e-116	1.21776e-112	45.3488	3.5784
shc2	seurat_clusters8	1.39403	1.24561	407854	0.771387	3.09483e-112	1.02559e-108	60.4651	7.74236
tnk2b	seurat_clusters8	0.593682	0.559469	349995	0.661957	1.09156e-110	3.25556e-107	34.3023	1.82173
khdrbs2	seurat_clusters8	0.639013	0.606062	344283	0.651153	1.15322e-96	3.12679e-93	31.9767	1.95185
ptpn20	seurat_clusters8	0.557218	0.528692	338587	0.64038	1.45602e-94	3.61881e-91	29.6512	1.62655
slc4a10a	seurat_clusters8	1.97298	1.58555	439403	0.831057	2.07862e-85	4.76883e-82	79.0698	20.7547
mrvi1	seurat_clusters8	0.539626	0.517402	326024	0.61662	4.06411e-84	8.65801e-81	24.4186	1.17111
skor1b	seurat_clusters8	0.634553	0.590726	346901	0.656105	2.35054e-83	4.67366e-80	33.7209	2.79766
ncam2	seurat_clusters8	2.641	2.13396	430082	0.813428	2.32258e-81	4.32943e-78	74.4186	19.0956
drp2	seurat_clusters8	0.910838	0.827509	357440	0.676039	8.39646e-78	1.39125e-74	38.9535	4.32661
si:ch211-235m3.10	seurat_clusters8	1.85581	1.54103	420565	0.795428	1.87219e-77	2.93885e-74	68.6047	17.4691
hivep3b	seurat_clusters8	0.709185	0.652071	347239	0.656744	1.26303e-76	1.8835e-73	34.3023	3.25309
slc8a2a	seurat_clusters8	1.51913	1.21153	418954	0.79238	6.66389e-76	9.46431e-73	72.093	17.2739
prox1a	seurat_clusters8	1.19507	1.00272	388039	0.73391	2.08907e-74	2.83211e-71	55.814	9.66168
PCP4	seurat_clusters8	1.08496	0.94582	372972	0.705415	1.53084e-71	1.90239e-68	47.093	7.35198
rem2	seurat_clusters8	0.562638	0.508269	344766	0.652068	2.11804e-71	2.52683e-68	33.7209	3.35068
rspo3	seurat_clusters8	0.800622	0.729797	349054	0.660176	6.39973e-71	7.34123e-68	35.4651	3.90371
grin1a	seurat_clusters8	1.1957	1.00466	390466	0.738501	5.5192e-70	6.09667e-67	56.3953	11.2232
KCNAB3	seurat_clusters8	0.657583	0.602511	339900	0.642863	1.71625e-65	1.70623e-62	31.3953	3.28562
nrg1	seurat_clusters8	0.59539	0.541132	333967	0.631642	3.195e-62	2.97784e-59	29.0698	2.86272
adgrb2	seurat_clusters8	0.579407	0.530665	330357	0.624815	5.50297e-62	4.97352e-59	27.3256	2.50488
camta1b	seurat_clusters8	1.57586	1.34965	381598	0.721729	1.14011e-61	1.00012e-58	52.3256	11.1906
tmc2a	seurat_clusters8	2.95685	1.92305	440640	0.833397	1.297e-61	1.10523e-58	91.2791	37.8985
adgrl2a	seurat_clusters8	2.38004	1.63717	434936	0.822608	1.61865e-61	1.30476e-58	88.9535	33.4418
nrp2b	seurat_clusters8	1.18311	0.939871	385568	0.729236	2.9369e-61	2.30508e-58	57.5581	12.1666
cers5	seurat_clusters8	1.13391	0.936278	383206	0.724771	2.46572e-60	1.88564e-57	54.6512	11.9063
myorg	seurat_clusters8	0.720247	0.621944	356510	0.674278	3.19652e-58	2.3834e-55	40.6977	6.50618
CR792457.1	seurat_clusters8	1.16975	0.961738	374388	0.708093	5.86778e-57	4.26845e-54	50.5814	10.5725
loxhd1a	seurat_clusters8	1.77408	1.2556	411674	0.778611	5.98107e-56	4.24727e-53	77.907	24.1379
efna3a	seurat_clusters8	0.577607	0.516983	325068	0.614812	9.96502e-53	6.7547e-50	25.5814	2.60247
ppm1e	seurat_clusters8	1.78878	1.281	402812	0.761851	4.2413e-49	2.74993e-46	70.9302	24.9837
zbtb46	seurat_clusters8	0.934563	0.761012	356614	0.674475	7.0945e-46	4.14889e-43	43.0233	9.17372
pdgfc	seurat_clusters8	0.782837	0.624941	348194	0.65855	5.20156e-45	2.98339e-42	39.5349	7.35198
bdnf	seurat_clusters8	1.87377	1.20218	409802	0.775071	1.28779e-44	7.11264e-42	76.7442	35.0358
zgc:77784	seurat_clusters8	1.23963	0.943077	374872	0.709006	3.02459e-44	1.61086e-41	54.6512	15.4196
tgfbr1a	seurat_clusters8	0.802283	0.669377	346808	0.65593	1.01065e-43	5.2882e-41	37.7907	7.41705
myo3a	seurat_clusters8	1.14931	0.874974	374486	0.708278	1.19181e-43	6.12856e-41	54.6512	15.5823
limch1a	seurat_clusters8	1.66225	1.12544	399764	0.756086	2.47967e-43	1.25349e-40	72.6744	28.7573
itpkcb	seurat_clusters8	0.659692	0.512175	342596	0.647962	2.51534e-42	1.21e-39	37.2093	6.7339
samd10b	seurat_clusters8	1.22593	0.966868	359747	0.680401	5.84402e-41	2.72341e-38	45.9302	11.7437
zgc:77158	seurat_clusters8	0.76768	0.579394	347218	0.656703	1.43294e-40	6.57501e-38	40.6977	8.23032
lrfn5a	seurat_clusters8	2.19265	1.38358	403004	0.762214	2.68616e-40	1.19574e-37	76.1628	35.784
zgc:113162	seurat_clusters8	1.58946	1.0746	391753	0.740935	4.52135e-40	1.98308e-37	67.4419	27.1308
ankrd24	seurat_clusters8	1.87797	1.1647	403969	0.764039	5.57884e-40	2.37698e-37	78.4884	37.2479
ano2b	seurat_clusters8	2.39146	1.65828	396980	0.75082	3.26573e-39	1.35278e-36	66.8605	32.4658
s100a1	seurat_clusters8	1.48205	1.11188	372850	0.705182	3.79538e-39	1.55064e-36	55.2326	17.5992
tekt3	seurat_clusters8	0.658582	0.526384	342642	0.64805	3.09815e-38	1.21582e-35	37.2093	7.83995
arhgef12b	seurat_clusters8	0.986453	0.718206	356304	0.673888	1.08931e-36	4.06107e-34	47.6744	12.3617
sox6	seurat_clusters8	1.58726	1.02782	378230	0.715359	1.50599e-36	5.54519e-34	66.2791	22.0885
syne1a	seurat_clusters8	0.911202	0.66498	361045	0.682856	2.43344e-36	8.74426e-34	50	14.3461
cxxc4	seurat_clusters8	0.777586	0.578527	351142	0.664127	8.80265e-35	3.0887e-32	44.186	11.5485
cdc14ab	seurat_clusters8	2.23978	1.19759	400198	0.756908	4.06646e-34	1.41026e-31	87.2093	47.1698
dnah3	seurat_clusters8	1.0471	0.740118	364455	0.689305	1.2848e-33	4.40449e-31	53.4884	17.6643
b4galnt4a	seurat_clusters8	1.49668	1.04143	371408	0.702455	5.02807e-33	1.70412e-30	59.3023	21.8933
atp1a3b	seurat_clusters8	3.16194	1.36223	402532	0.761322	2.1865e-32	7.32722e-30	90.6977	61.7437
ptbp3	seurat_clusters8	2.89156	1.16294	403236	0.762653	4.75369e-32	1.57532e-29	97.093	67.6643
dnajc6	seurat_clusters8	1.54713	0.931381	384408	0.727042	8.21154e-32	2.69131e-29	72.093	33.4092
cntnap2b	seurat_clusters8	0.686037	0.519544	341006	0.644954	9.24994e-31	2.93489e-28	38.3721	10.0846
kdm7ab	seurat_clusters8	1.10415	0.748755	362107	0.684864	1.30343e-30	4.0921e-28	54.6512	18.998
dnah5	seurat_clusters8	2.62661	1.19641	396716	0.750321	1.49735e-30	4.65191e-28	91.2791	56.4736
fhdc1	seurat_clusters8	0.88793	0.641173	351636	0.66506	2.00833e-30	6.1751e-28	45.9302	14.216
cables1	seurat_clusters8	0.930421	0.710318	343946	0.650515	4.95589e-30	1.50826e-27	40.1163	11.4834
myo15aa	seurat_clusters8	2.29203	1.12535	392694	0.742716	6.90242e-30	2.07944e-27	87.2093	50.5205
dennd2b	seurat_clusters8	0.754987	0.535594	341111	0.645154	1.33709e-28	3.90968e-26	40.6977	11.1256
kcnma1a	seurat_clusters8	3.07552	1.29791	394272	0.745698	1.36627e-28	3.95622e-26	93.6047	63.8582
xirp2a	seurat_clusters8	1.09077	0.715181	360488	0.681803	1.44488e-28	4.14362e-26	55.2326	20.1366
atp6v1c2	seurat_clusters8	0.704162	0.514212	339500	0.642107	4.27086e-28	1.19045e-25	38.9535	10.8653
si:dkey-280e21.3	seurat_clusters8	1.64718	0.935925	376506	0.712098	1.08915e-27	2.98017e-25	72.6744	34.0599
dnah9l	seurat_clusters8	1.78106	0.972426	378699	0.716245	7.05196e-27	1.8779e-24	75.5814	38.907
kcnn2	seurat_clusters8	1.72304	1.0492	370736	0.701184	1.01757e-26	2.66221e-24	62.7907	30.6766
ttc6	seurat_clusters8	1.26679	0.772818	364924	0.690192	1.56407e-26	4.02141e-24	61.6279	25.797
hipk2	seurat_clusters8	1.22256	0.748632	359418	0.67978	2.03675e-26	5.14796e-24	58.7209	21.8933
atp2a2b	seurat_clusters8	1.35971	0.805037	368950	0.697808	4.59059e-26	1.15054e-23	65.6977	30.1236
si:ch211-278j3.3	seurat_clusters8	0.781483	0.540553	343333	0.649357	6.55903e-25	1.5776e-22	43.6047	14.6064
eps8l2	seurat_clusters8	1.40307	0.818451	366257	0.692713	1.5383e-24	3.64125e-22	64.5349	30.8393
pclob	seurat_clusters8	2.56133	1.06822	382178	0.722826	3.00497e-24	6.94754e-22	92.4419	59.0761
atp2b2	seurat_clusters8	0.82854	0.549707	344165	0.65093	3.89333e-24	8.93219e-22	45.3488	15.6799
mindy4b	seurat_clusters8	1.05333	0.785909	345504	0.653464	5.04054e-24	1.14759e-21	44.186	16.6233
pls1	seurat_clusters8	1.10511	0.690864	355743	0.672828	5.25268e-24	1.1779e-21	55.2326	22.9018
nfixb	seurat_clusters8	2.63345	1.04598	379280	0.717343	1.15752e-23	2.55727e-21	79.6512	55.27
si:ch211-207i1.2	seurat_clusters8	1.28393	0.749824	360670	0.682147	1.71311e-23	3.70243e-21	61.6279	27.7163
sdr42e2	seurat_clusters8	0.849497	0.599348	341388	0.645679	2.12575e-23	4.49649e-21	41.8605	15.0618
si:ch211-285f17.1	seurat_clusters8	1.68373	0.905766	369205	0.698289	3.66189e-23	7.63747e-21	71.5116	38.0286
atp1b2b	seurat_clusters8	2.62775	1.08244	377176	0.713365	1.45913e-22	2.96045e-20	84.8837	57.5797
calm1a	seurat_clusters8	1.86212	1.1015	362927	0.686415	2.27783e-22	4.55947e-20	59.8837	32.9538
arfgef1	seurat_clusters8	1.96293	0.911394	372894	0.705267	2.51952e-22	4.97646e-20	81.3953	47.7879
pdzrn4	seurat_clusters8	0.722572	0.502428	333772	0.631273	4.91424e-22	9.51735e-20	38.3721	12.5244
mipol1	seurat_clusters8	1.44616	0.773017	363332	0.687182	8.0142e-22	1.5322e-19	69.186	34.5804
plekho1b	seurat_clusters8	1.03821	0.611236	351208	0.66425	1.51314e-21	2.87448e-19	55.814	23.3897
raver2	seurat_clusters8	1.27012	0.680512	358860	0.678723	2.62623e-21	4.89547e-19	65.6977	30.8393
si:ch211-286b4.4	seurat_clusters8	2.02625	0.942429	369082	0.698057	4.02706e-21	7.46006e-19	79.6512	46.5192
sdk1b	seurat_clusters8	0.7737	0.527992	328778	0.621828	4.43953e-21	8.17339e-19	35.4651	11.0605
calm1b	seurat_clusters8	2.42579	1.09401	370248	0.700263	1.57455e-20	2.82897e-18	81.9767	53.4157
wdpcp	seurat_clusters8	1.01151	0.605803	344812	0.652153	1.9643e-20	3.48722e-18	50.5814	20.4945
IQSEC1	seurat_clusters8	1.1712	0.68528	350745	0.663375	2.28227e-20	4.02774e-18	55.2326	25.3416
mtmr11	seurat_clusters8	1.42744	0.771369	357666	0.676465	6.56192e-20	1.12477e-17	65.1163	33.637
prkn	seurat_clusters8	0.901423	0.604443	336734	0.636877	7.65351e-20	1.30438e-17	41.2791	16.2655
kcnh7	seurat_clusters8	0.819098	0.514324	330800	0.625653	2.03472e-19	3.37141e-17	38.9535	13.3702
si:dkey-96l17.6	seurat_clusters8	0.972036	0.582901	343993	0.650605	2.31804e-19	3.81964e-17	50.5814	21.6981
pygmb	seurat_clusters8	1.03352	0.621148	345648	0.653736	3.01613e-19	4.86248e-17	50.5814	23.3247
msi2b	seurat_clusters8	2.24754	0.976987	366190	0.692586	3.59824e-19	5.69433e-17	79.0698	52.9928
lrrc73	seurat_clusters8	1.24438	0.671744	352120	0.665977	3.60848e-19	5.69433e-17	61.0465	29.3754
si:dkey-11c5.11	seurat_clusters8	1.25393	0.746833	347183	0.656638	4.30046e-19	6.68027e-17	53.4884	24.8861
smpx	seurat_clusters8	1.0188	0.605591	344926	0.65237	4.28345e-19	6.68027e-17	50.5814	22.9993
sipa1l2	seurat_clusters8	1.52835	0.753942	359220	0.679405	4.36653e-19	6.72791e-17	69.7674	38.8419
tuba1a	seurat_clusters8	1.40949	0.816647	348584	0.659287	6.68488e-19	1.02244e-16	55.2326	26.6103
galnt11	seurat_clusters8	1.00218	0.559595	345990	0.654382	6.98349e-19	1.06267e-16	54.6512	24.1705
znf804a	seurat_clusters8	1.05263	0.676477	336948	0.63728	7.73879e-19	1.17162e-16	43.0233	17.6643
aldocb	seurat_clusters8	1.8103	0.796254	362794	0.686163	9.53566e-19	1.42201e-16	75	47.4301
skor1a	seurat_clusters8	0.83934	0.518055	337451	0.638232	1.10725e-18	1.64298e-16	44.7674	18.1522
dpp6b	seurat_clusters8	1.41956	0.796341	346168	0.654718	1.22715e-18	1.80294e-16	54.6512	24.8861
mvb12ba	seurat_clusters8	0.965281	0.549173	342798	0.648345	2.04238e-18	2.92856e-16	51.7442	22.4463
IGLON5	seurat_clusters8	0.701639	0.551864	312314	0.59069	7.39668e-18	1.03087e-15	24.4186	6.89655
cfap57	seurat_clusters8	1.48264	0.726595	354606	0.670678	8.22641e-18	1.14117e-15	68.6047	37.0852
grm4	seurat_clusters8	0.989867	0.62207	335084	0.633755	1.03359e-17	1.40762e-15	43.0233	18.0547
nrg2a	seurat_clusters8	0.956328	0.57319	336729	0.636866	1.23796e-17	1.67829e-15	45.3488	19.2908
espn	seurat_clusters8	2.10577	0.826219	361998	0.684658	1.42336e-17	1.92089e-15	83.1395	54.5218
arhgap12b	seurat_clusters8	1.25269	0.66338	349327	0.660693	1.48486e-17	1.99486e-15	60.4651	31.0345
ext1a	seurat_clusters8	0.980195	0.616983	335058	0.633705	1.84642e-17	2.44753e-15	43.6047	18.4125
rxraa	seurat_clusters8	1.23213	0.677974	340990	0.644926	1.9443e-17	2.55456e-15	52.3256	22.8692
si:dkey-19b23.13	seurat_clusters8	0.895685	0.510631	339824	0.64272	2.59492e-17	3.37963e-15	50	22.2186
akt3a	seurat_clusters8	2.38585	0.895491	360955	0.682686	6.97913e-17	8.85756e-15	81.9767	58.7508
hydin	seurat_clusters8	1.03488	0.562275	342392	0.647576	7.19605e-17	9.05579e-15	54.0698	25.5042
nrxn3a	seurat_clusters8	2.61332	0.925677	360610	0.682032	1.12958e-16	1.39792e-14	88.9535	59.7593
march4l	seurat_clusters8	0.840291	0.518656	331370	0.626732	1.4131e-16	1.74155e-14	41.2791	17.2739
pde4bb	seurat_clusters8	0.925386	0.558454	332394	0.628667	3.27775e-16	3.94189e-14	42.4419	18.6077
ugt8	seurat_clusters8	1.40142	0.647386	351176	0.664191	3.73799e-16	4.44165e-14	68.6047	39.3624
oxr1b	seurat_clusters8	0.933731	0.519162	338343	0.639919	3.95472e-16	4.68053e-14	50	23.5524
ncanb	seurat_clusters8	1.78977	0.786729	352290	0.666297	8.87866e-16	1.02956e-13	70.9302	43.7866
pou4f1	seurat_clusters8	0.936478	0.543147	335346	0.634251	1.20206e-15	1.37361e-13	45.9302	22.0885
si:ch211-254n4.3	seurat_clusters8	1.11989	0.569678	341012	0.644967	1.23398e-15	1.40239e-13	55.814	27.4561
dpysl3	seurat_clusters8	0.917681	0.505674	336414	0.63627	1.23664e-15	1.40239e-13	48.8372	22.9668
capgb	seurat_clusters8	1.03127	0.583217	335560	0.634655	1.49296e-15	1.68665e-13	47.6744	22.4138
si:ch211-218o21.4	seurat_clusters8	1.45536	0.669103	348150	0.658466	2.09395e-15	2.34782e-13	64.5349	38.1588
hivep2a	seurat_clusters8	2.16169	0.831914	355120	0.671649	2.35002e-15	2.61527e-13	84.8837	54.8796
oaz2a	seurat_clusters8	1.03374	0.579772	336445	0.636329	2.57825e-15	2.8586e-13	48.2558	23.8452
fgf22	seurat_clusters8	0.989183	0.590719	330278	0.624665	2.59986e-15	2.87189e-13	42.4419	18.6077
calm3a	seurat_clusters8	2.76908	1.05438	355438	0.672252	4.63785e-15	5.06681e-13	80.814	60.7027
erich3	seurat_clusters8	1.09461	0.545355	341732	0.646329	4.74348e-15	5.16329e-13	59.3023	30.1887
aak1a	seurat_clusters8	1.11102	0.571241	339410	0.641936	6.47153e-15	6.96799e-13	54.0698	28.0091
wdr95	seurat_clusters8	1.37372	0.642206	345408	0.653281	8.43093e-15	8.85396e-13	63.9535	36.5973
atp9b	seurat_clusters8	0.959902	0.53443	332964	0.629744	1.38482e-14	1.42914e-12	46.5116	22.3813
meis1b	seurat_clusters8	1.66855	0.685141	347419	0.657085	3.14562e-14	3.18028e-12	75	43.6565
cnsta	seurat_clusters8	1.04453	0.536526	335244	0.634058	7.47799e-14	7.31249e-12	52.3256	26.7079
nr3c2	seurat_clusters8	0.956386	0.526033	328680	0.621643	1.50213e-13	1.42225e-11	44.186	21.015
sdk1a	seurat_clusters8	1.5995	0.699864	343696	0.650044	1.51051e-13	1.42567e-11	62.7907	40.9889
adgrl1a	seurat_clusters8	1.38664	0.738593	334078	0.631851	2.42705e-13	2.25504e-11	49.4186	27.2609
setbp1	seurat_clusters8	1.46145	0.625396	343011	0.648748	2.51316e-13	2.32779e-11	68.0233	40.7938
syne1b	seurat_clusters8	1.88976	0.707323	347198	0.656666	2.60756e-13	2.40375e-11	80.2326	51.5615
pkma	seurat_clusters8	1.39329	0.59328	342567	0.647908	2.98328e-13	2.69688e-11	65.6977	40.501
pcdh15b	seurat_clusters8	1.83417	0.705951	344336	0.651253	4.59051e-13	4.08693e-11	66.8605	46.1939
BX537310.2	seurat_clusters8	1.15683	0.615148	331046	0.626118	5.58407e-13	4.91283e-11	47.6744	24.9837
nrxn3b	seurat_clusters8	3.18672	0.873522	348628	0.65937	9.30304e-13	7.99606e-11	91.8605	68.933
ndrg3b	seurat_clusters8	2.34611	0.763743	347600	0.657426	1.19489e-12	1.01822e-10	88.9535	64.216
eya1	seurat_clusters8	2.84587	0.639894	349008	0.66009	1.2748e-12	1.08322e-10	93.0233	81.4899
usp2a	seurat_clusters8	1.48333	0.60099	341424	0.645745	1.64372e-12	1.37707e-10	70.3488	43.4288
fut8a	seurat_clusters8	2.24759	0.716938	346132	0.654649	2.19005e-12	1.80437e-10	84.3023	61.4183
micu1	seurat_clusters8	0.972487	0.500898	329722	0.623614	3.57954e-12	2.90108e-10	49.4186	26.1874
glsb	seurat_clusters8	1.11492	0.531196	333646	0.631035	3.81619e-12	3.07616e-10	54.6512	31.5224
kifc3	seurat_clusters8	1.18769	0.537798	335718	0.634955	4.20929e-12	3.37478e-10	58.7209	35.0033
ptprq	seurat_clusters8	2.09947	0.736667	343098	0.648913	5.1e-12	4.07795e-10	78.4884	53.7736
cabp2b	seurat_clusters8	1.38611	0.564786	331612	0.627189	5.62009e-12	4.45796e-10	58.7209	29.0501
osbpl1a	seurat_clusters8	1.70457	0.653994	340714	0.644404	6.60023e-12	5.16672e-10	72.093	47.2999
CABZ01077956.1	seurat_clusters8	1.59325	0.650546	338296	0.63983	8.28525e-12	6.45189e-10	64.5349	42.1601
twf2b	seurat_clusters8	1.5308	0.61504	338408	0.640041	8.9892e-12	6.89765e-10	64.5349	42.7456
dlg1l	seurat_clusters8	1.6703	0.61173	340807	0.644579	9.34441e-12	7.14608e-10	75.5814	49.1542
ccdc102a	seurat_clusters8	1.22604	0.557824	333642	0.631027	1.22564e-11	9.25436e-10	56.3953	34.2225
slc12a2	seurat_clusters8	1.81084	0.641558	341448	0.645792	1.26213e-11	9.50581e-10	77.907	53.123
b4galt2	seurat_clusters8	1.65063	0.653287	337836	0.63896	1.45198e-11	1.08807e-09	65.1163	43.1685
fndc3ba	seurat_clusters8	1.3656	0.55814	332238	0.628373	1.72347e-11	1.27735e-09	61.6279	32.3682
pacrg	seurat_clusters8	1.18143	0.515776	333528	0.630813	2.10236e-11	1.54061e-09	59.8837	35.296
gal3st1a	seurat_clusters8	1.3303	0.552351	335222	0.634017	2.21417e-11	1.61461e-09	63.3721	38.6792
eya4	seurat_clusters8	1.81253	0.626442	340223	0.643475	2.91773e-11	2.11217e-09	78.4884	53.7736
myo7aa	seurat_clusters8	1.30382	0.524537	334104	0.631902	5.11329e-11	3.55487e-09	64.5349	39.0371
otofb	seurat_clusters8	2.78698	0.829239	341014	0.64497	6.10707e-11	4.20655e-09	87.7907	64.5088
calm3b	seurat_clusters8	1.61973	0.693316	334012	0.631728	9.26984e-11	6.28348e-09	58.1395	41.4118
fam160a1a	seurat_clusters8	1.19612	0.501171	330198	0.624514	1.48544e-10	9.93346e-09	60.4651	34.6454
magi3b	seurat_clusters8	1.53117	0.584551	333336	0.630448	1.78831e-10	1.18001e-08	64.5349	42.0625
fgf10a	seurat_clusters8	1.23176	0.561263	327088	0.618631	4.07242e-10	2.55705e-08	52.3256	32.2707
nrg3b	seurat_clusters8	1.3727	0.568387	327442	0.6193	1.05008e-09	6.33979e-08	57.5581	35.5888
prkcbb	seurat_clusters8	1.38644	0.544855	328573	0.621441	1.14266e-09	6.87094e-08	59.8837	38.2563
march8	seurat_clusters8	1.30236	0.502427	327390	0.619202	3.02382e-09	1.73433e-07	61.0465	39.3624
zgc:158463	seurat_clusters8	4.64182	1.11946	334463	0.63258	3.30523e-09	1.88127e-07	93.0233	72.4463
atxn1a	seurat_clusters8	1.26696	0.505715	324794	0.614292	5.69596e-09	3.14654e-07	55.814	36.1418
col18a1a	seurat_clusters8	1.96138	0.618013	330482	0.625052	6.69176e-09	3.67554e-07	75.5814	53.8386
cdh23	seurat_clusters8	1.32399	0.512009	324470	0.61368	7.89311e-09	4.28802e-07	55.814	36.6949
laptm4b	seurat_clusters8	2.15245	0.6455	328680	0.621644	2.44179e-08	1.23435e-06	79.0698	57.5472
nptna	seurat_clusters8	2.16659	0.65631	328772	0.621816	2.80457e-08	1.41294e-06	85.4651	59.5316
pbx3b	seurat_clusters8	2.4718	0.612327	329429	0.623059	3.36993e-08	1.66129e-06	83.7209	68.38
strc	seurat_clusters8	2.08759	0.657649	326636	0.617778	3.60193e-08	1.764e-06	82.5581	50.8458
si:ch211-243g18.2	seurat_clusters8	2.54389	0.577972	327538	0.619483	9.1211e-08	4.19163e-06	85.4651	70.7872
sorcs2	seurat_clusters8	2.17366	0.548398	326252	0.617051	1.04743e-07	4.78402e-06	77.3256	61.4834
jmjd1cb	seurat_clusters8	1.90813	0.505864	325726	0.616056	1.30937e-07	5.91698e-06	82.5581	60.8003
CT027638.1	seurat_clusters8	3.67124	0.837032	326868	0.618217	1.31528e-07	5.93243e-06	90.6977	72.2186
TENM2	seurat_clusters8	2.26951	0.749601	321164	0.607429	1.60858e-07	7.08656e-06	61.0465	42.7131
si:dkey-205h13.1	seurat_clusters8	2.06861	0.608282	323186	0.611252	2.94663e-07	1.24481e-05	79.6512	55.6604
iqsec1b	seurat_clusters8	2.44889	0.525902	316892	0.599348	8.35739e-06	0.000261552	87.7907	68.38
kif1aa	seurat_clusters8	2.39683	0.506963	308124	0.582766	0.000211139	0.00429845	91.8605	69.5511

## Sheet: seurat_clusters9
feature	group	avgExpr	logFC	statistic	auc	pval	padj	pct_in	pct_out
odf3l2b	seurat_clusters9	1.91809	1.76188	457279	0.869641	1.0077e-199	3.00548e-195	80.117	7.02439
zgc:56628	seurat_clusters9	1.96603	1.75526	426428	0.810969	5.93847e-121	8.85574e-117	68.4211	10.0163
prox1a	seurat_clusters9	1.33614	1.15131	408916	0.777666	1.65898e-103	1.6493e-99	64.3275	9.20325
rspo3	seurat_clusters9	0.754213	0.68057	359058	0.682846	2.37851e-91	1.77348e-87	40.3509	3.64228
cabp5b	seurat_clusters9	1.37769	1.26262	355112	0.675344	2.84868e-81	1.69924e-77	38.5965	3.96748
bmp2a	seurat_clusters9	0.734329	0.669081	352326	0.670044	1.82387e-78	9.06617e-75	37.4269	3.86992
shc2	seurat_clusters9	1.14912	0.986673	379094	0.720951	1.2241e-74	5.21554e-71	51.462	8.26016
iqca1	seurat_clusters9	1.06932	0.940646	370776	0.705132	9.99629e-74	3.72674e-70	46.7836	6.95935
CR792457.1	seurat_clusters9	1.2616	1.05839	384615	0.731451	1.18373e-69	3.92275e-66	54.9708	10.3415
fgfr3	seurat_clusters9	0.922537	0.798959	362344	0.689095	3.16959e-69	9.45329e-66	43.8596	6.14634
cfap92	seurat_clusters9	1.65195	1.23608	412982	0.785399	3.24807e-64	8.80671e-61	75.4386	20.6504
chrm3a	seurat_clusters9	0.631201	0.559176	335344	0.637748	2.48181e-60	6.16833e-57	30.9942	3.34959
AL929216.1	seurat_clusters9	1.22516	0.984843	375256	0.713652	6.63736e-59	1.52276e-55	53.2164	10.6341
si:dkey-16p21.8	seurat_clusters9	0.955441	0.80535	366596	0.697183	3.28314e-58	6.99426e-55	46.7836	8.87805
capgb	seurat_clusters9	1.66488	1.25187	399450	0.759663	4.05134e-53	7.55195e-50	67.2515	21.3333
tmc1	seurat_clusters9	3.13541	1.97652	422830	0.804127	1.44253e-51	2.53079e-48	87.7193	37.6911
s100a1	seurat_clusters9	1.56848	1.20275	383908	0.730105	1.58893e-48	2.63277e-45	59.6491	17.3659
frmpd3	seurat_clusters9	1.34291	0.994762	381954	0.726391	4.38308e-47	6.88028e-44	60.8187	17.2683
tmc5	seurat_clusters9	2.28689	1.39091	412328	0.784154	1.59853e-43	2.27029e-40	87.7193	41.0732
shtn3	seurat_clusters9	1.90892	1.21193	402922	0.766266	1.94687e-42	2.63934e-39	76.0234	33.8862
fxyd1	seurat_clusters9	1.14848	0.818431	367159	0.698253	1.1306e-35	1.24889e-32	55.5556	18.2114
otofa	seurat_clusters9	2.99924	1.58567	391916	0.745335	5.59894e-32	5.38672e-29	88.3041	43.8699
kcnd3	seurat_clusters9	1.287	0.986521	349095	0.6639	1.11037e-31	1.00354e-28	43.8596	13.1382
celf4	seurat_clusters9	1.2457	0.902554	354185	0.67358	5.1497e-31	4.51734e-28	47.9532	15.7073
syne2a	seurat_clusters9	1.40105	0.87322	373498	0.710308	1.30421e-30	1.11137e-27	65.4971	27.5122
calm3a	seurat_clusters9	3.0953	1.3984	395482	0.752116	2.69555e-30	2.23319e-27	81.8713	60.6504
mctp1a	seurat_clusters9	2.29362	1.17461	385922	0.733936	2.63856e-28	2.12689e-25	81.8713	48.0325
calml4a	seurat_clusters9	1.27568	0.825685	357815	0.680483	8.25706e-26	6.00651e-23	54.386	23.0894
smpx	seurat_clusters9	1.14608	0.739755	356374	0.677744	2.82025e-25	1.95614e-22	53.8012	22.8293
si:ch211-235m3.10	seurat_clusters9	1.18451	0.831891	349486	0.664642	4.04077e-25	2.67813e-22	47.9532	18.6341
gstp1	seurat_clusters9	1.91379	1.1639	368739	0.701258	4.88115e-25	3.09745e-22	64.9123	34.3089
fhod1	seurat_clusters9	1.39712	0.81936	364762	0.693694	5.11078e-25	3.1756e-22	64.3275	30.0163
calm1b	seurat_clusters9	2.48717	1.15844	379504	0.721731	1.12124e-24	6.82471e-22	82.4561	53.3984
prkcbb	seurat_clusters9	1.77398	0.953769	367939	0.699737	1.75959e-23	9.38717e-21	73.0994	37.5285
rps6ka3b	seurat_clusters9	0.769342	0.543117	331975	0.631341	6.37555e-23	3.27846e-20	37.4269	11.8049
tbc1d14	seurat_clusters9	0.960311	0.649312	344738	0.655615	6.7819e-23	3.42831e-20	46.1988	18.374
si:ch211-286b4.4	seurat_clusters9	2.05827	0.975918	366654	0.697292	7.27941e-21	3.34013e-18	79.5322	46.5366
cplx2	seurat_clusters9	1.34491	0.712979	356999	0.678931	1.79153e-20	8.09581e-18	66.6667	33.0732
lrrc73	seurat_clusters9	1.32233	0.753809	352298	0.66999	6.27261e-20	2.69916e-17	57.8947	29.561
tenm3	seurat_clusters9	1.46567	0.795551	352476	0.67033	9.10965e-20	3.77355e-17	61.9883	29.9837
rcan3	seurat_clusters9	1.0903	0.640334	347360	0.660599	1.31923e-19	5.38988e-17	53.2164	25.5285
si:ch211-284k5.2	seurat_clusters9	0.856368	0.531601	339407	0.645475	1.70447e-19	6.77811e-17	46.7836	19.4146
AL954359.2	seurat_clusters9	0.683598	0.504178	318798	0.606282	1.4648e-18	5.26357e-16	29.8246	9.46341
pde1a	seurat_clusters9	1.48525	0.939401	343176	0.652644	2.33404e-18	8.28722e-16	49.7076	24.5528
slc4a10a	seurat_clusters9	1.03631	0.596272	339580	0.645804	7.84311e-18	2.75201e-15	50.8772	22.3415
kcnq1.2	seurat_clusters9	0.884546	0.600702	328845	0.625389	1.74779e-17	5.85707e-15	37.4269	15.5447
arglu1a	seurat_clusters9	1.39103	0.709701	350154	0.665915	2.96856e-17	9.62361e-15	62.5731	35.5447
CR925719.1	seurat_clusters9	0.805348	0.555551	318317	0.605367	8.13013e-17	2.52584e-14	30.9942	10.6016
galnt9	seurat_clusters9	1.41492	0.742565	344262	0.654707	9.3767e-17	2.88309e-14	59.6491	29.5285
si:ch211-243g18.2	seurat_clusters9	2.80041	0.848559	359250	0.683213	3.05855e-16	8.60577e-14	88.8889	70.6016
mt2	seurat_clusters9	0.722067	0.503384	318818	0.60632	3.00518e-16	8.60577e-14	31.5789	11.3821
nptna	seurat_clusters9	2.35938	0.859603	357114	0.679149	3.81087e-16	1.0524e-13	90.0585	59.2846
si:ch211-218o21.4	seurat_clusters9	1.47763	0.692396	347666	0.661182	8.31583e-16	2.25472e-13	64.9123	38.1463
tuba1a	seurat_clusters9	1.32284	0.724923	338460	0.643674	1.37585e-15	3.53748e-13	52.0468	26.7967
gcnt4a	seurat_clusters9	0.887816	0.52133	331594	0.630617	2.17222e-15	5.31037e-13	45.0292	20.813
tmc2b	seurat_clusters9	1.43482	0.694315	343564	0.653381	2.85571e-15	6.92452e-13	63.1579	34.0813
sh2d4bb	seurat_clusters9	0.987815	0.5071	334948	0.636996	3.61489e-15	8.4893e-13	53.2164	24.1301
btc	seurat_clusters9	1.24288	0.604686	341944	0.6503	8.99781e-15	1.95883e-12	60.8187	33.9837
pou4f1	seurat_clusters9	0.923846	0.529636	330922	0.629339	1.46982e-14	3.10903e-12	45.0292	22.1463
ppp1r14d	seurat_clusters9	1.27768	0.623646	340865	0.648248	1.87378e-14	3.88095e-12	58.4795	33.9187
kcnab1a	seurat_clusters9	1.15735	0.599231	332051	0.631486	1.97016e-14	4.02466e-12	50.2924	23.3171
prkg1a	seurat_clusters9	1.072	0.556387	334262	0.63569	2.65493e-14	5.35022e-12	52.0468	26.0163
arf2a	seurat_clusters9	1.23955	0.599375	340095	0.646784	3.6388e-14	7.18722e-12	59.0643	34.0488
wdpcp	seurat_clusters9	0.929534	0.519069	328206	0.624173	4.70484e-14	9.05302e-12	44.4444	20.8455
si:dkey-222f2.1	seurat_clusters9	2.28251	0.772749	350092	0.665797	5.55355e-14	1.06176e-11	79.5322	61.0081
nrxn3a	seurat_clusters9	2.52202	0.828999	348400	0.662578	1.53677e-13	2.8119e-11	84.7953	60
pclob	seurat_clusters9	2.2773	0.768045	347210	0.660315	3.11613e-13	5.63264e-11	86.5497	59.4146
cpeb4b	seurat_clusters9	2.05685	0.724066	346384	0.658745	4.66672e-13	8.18736e-11	84.7953	58.5366
ppm1e	seurat_clusters9	1.09614	0.549421	330282	0.628122	6.6397e-13	1.1381e-10	52.0468	26.0488
cox7c	seurat_clusters9	1.78074	0.677928	340578	0.647703	3.40798e-12	5.43546e-10	71.345	48.8455
tspan13b	seurat_clusters9	1.78929	0.672026	340246	0.64707	4.1024e-12	6.5082e-10	70.7602	48.748
zmat4a	seurat_clusters9	1.82787	0.735181	337880	0.642572	5.39029e-12	8.3732e-10	66.0819	43.5122
ndrg3b	seurat_clusters9	2.31378	0.729368	343335	0.652945	5.78955e-12	8.90068e-10	87.7193	64.2927
osbpl2b	seurat_clusters9	1.22456	0.534173	332592	0.632515	6.58343e-12	1.00693e-09	61.4035	33.3984
gpx1b	seurat_clusters9	1.62093	0.620587	337140	0.641163	1.38643e-11	2.099e-09	69.5906	45.3008
apba1a	seurat_clusters9	1.4639	0.578375	336030	0.639054	1.49896e-11	2.2242e-09	66.0819	42.8618
si:dkey-26i13.8	seurat_clusters9	1.0716	0.518273	327020	0.621919	2.00612e-11	2.91866e-09	50.8772	27.8049
wdr95	seurat_clusters9	1.27466	0.537435	332421	0.632189	2.47891e-11	3.57167e-09	61.9883	36.7154
atp5meb	seurat_clusters9	1.05641	0.506689	326477	0.620885	3.5884e-11	5.0246e-09	49.7076	28.2602
ckbb	seurat_clusters9	2.31632	0.806754	337930	0.642665	4.44982e-11	6.06009e-09	75.4386	54.2764
xirp2b	seurat_clusters9	1.26527	0.584938	328277	0.624308	6.30945e-11	8.40086e-09	54.386	32.0976
twf2b	seurat_clusters9	1.48776	0.56941	333636	0.634501	6.40576e-11	8.49119e-09	69.5906	42.4715
ptbp3	seurat_clusters9	2.47943	0.727517	339560	0.645767	6.95835e-11	9.14241e-09	92.3977	67.935
osbpl1a	seurat_clusters9	1.66355	0.610472	335007	0.637107	7.96876e-11	1.03785e-08	73.0994	47.252
calm3b	seurat_clusters9	1.58969	0.661384	332399	0.632148	9.10252e-11	1.16516e-08	59.0643	41.3659
h1-0	seurat_clusters9	1.15948	0.595896	324552	0.617225	9.88869e-11	1.26039e-08	46.1988	27.7724
hsp70.3	seurat_clusters9	2.05061	0.729051	335528	0.638099	1.11485e-10	1.40487e-08	73.0994	51.0244
hsp70l	seurat_clusters9	2.80149	0.890776	336904	0.640715	1.23795e-10	1.55134e-08	78.3626	57.561
kcnma1a	seurat_clusters9	2.51327	0.70397	337592	0.642023	1.61444e-10	1.98151e-08	83.6257	64.4228
hsp70.1	seurat_clusters9	2.19776	0.751068	335164	0.637407	1.70445e-10	2.0749e-08	74.269	52.3902
col18a1a	seurat_clusters9	2.03537	0.695923	335405	0.637864	1.82961e-10	2.20924e-08	79.5322	53.626
znf536	seurat_clusters9	2.33338	0.748529	335696	0.638419	2.77548e-10	3.27188e-08	83.0409	58.4715
myo15aa	seurat_clusters9	1.82763	0.634764	333708	0.634637	3.33997e-10	3.83505e-08	78.9474	50.9919
kcnh3	seurat_clusters9	1.04667	0.534037	318308	0.605349	7.69519e-10	8.31554e-08	41.5205	23.5772
eno1a	seurat_clusters9	1.5422	0.559171	329228	0.626118	1.29675e-09	1.36182e-07	64.9123	44.5854
si:dkey-11c5.11	seurat_clusters9	1.0705	0.552955	319010	0.606685	1.32209e-09	1.37882e-07	42.6901	25.4959
meis1b	seurat_clusters9	1.54335	0.552751	328588	0.624901	1.74329e-09	1.7806e-07	69.5906	43.9675
cdc14ab	seurat_clusters9	1.64664	0.571079	329592	0.626809	2.04066e-09	2.04925e-07	71.345	48.065
ubb	seurat_clusters9	1.42626	0.512125	326558	0.621038	5.5087e-09	5.06243e-07	61.4035	44.5203
prdx2	seurat_clusters9	1.28014	0.519035	323034	0.614337	7.84205e-09	6.94033e-07	54.9708	37.1382
ush1c	seurat_clusters9	1.61494	0.550677	325409	0.618854	8.9852e-09	7.92851e-07	69.0058	43.3171
slc12a2	seurat_clusters9	1.71035	0.535269	328004	0.62379	9.75291e-09	8.53022e-07	76.0234	53.2358
tubb4b	seurat_clusters9	0.984808	0.516106	313928	0.597021	1.44931e-08	1.21762e-06	39.7661	23.6423
h2ax1	seurat_clusters9	1.48148	0.519295	323608	0.615428	2.26036e-08	1.84195e-06	62.5731	43.4146
dacha	seurat_clusters9	1.8546	0.564334	322695	0.613693	1.00815e-07	7.19334e-06	71.345	50.374
atp1a3b	seurat_clusters9	2.54042	0.705703	324831	0.617755	1.01262e-07	7.20794e-06	87.1345	61.9512
calm1a	seurat_clusters9	1.35774	0.56872	315776	0.600535	1.67458e-07	1.1351e-05	47.3684	33.6585
laptm4b	seurat_clusters9	2.10281	0.592887	320999	0.610467	4.39497e-07	2.71171e-05	80.7018	57.4634
tenm2a	seurat_clusters9	2.1768	0.651485	316712	0.602315	6.47216e-07	3.81487e-05	54.386	43.0894
tmem269	seurat_clusters9	2.00675	0.542777	317700	0.604194	1.68122e-06	8.69021e-05	78.3626	55.7398
dnajb1b	seurat_clusters9	1.82277	0.529818	316626	0.602151	1.77862e-06	9.14969e-05	68.4211	50.9593
CR383676.1	seurat_clusters9	2.23591	0.970283	303482	0.577153	2.83744e-06	0.000136494	35.0877	21.3984
CT027638.1	seurat_clusters9	3.4845	0.639637	317814	0.60441	3.35784e-06	0.000158461	86.5497	72.4553
mt-cyb	seurat_clusters9	1.51145	0.662413	304378	0.578859	4.01135e-06	0.000185199	36.8421	23.7398
gapdhs	seurat_clusters9	2.33296	0.506905	316848	0.602574	4.18255e-06	0.000191326	80.7018	66.6667
mt-co3	seurat_clusters9	1.78163	0.784503	303886	0.577923	5.927e-06	0.000262664	36.2573	24.1951
strc	seurat_clusters9	1.97169	0.53509	312390	0.594096	1.1364e-05	0.000448323	71.9298	51.4472
pvalb9	seurat_clusters9	1.80291	0.525357	309692	0.588963	1.40164e-05	0.000536636	58.4795	42.1789
atp1b2b	seurat_clusters9	2.09657	0.521359	312715	0.594713	1.51398e-05	0.000573025	78.3626	57.9512
mt-co2	seurat_clusters9	1.76266	0.718881	299613	0.569796	5.29959e-05	0.00156186	34.5029	24.5528
mt-atp6	seurat_clusters9	1.41783	0.571109	297393	0.565574	8.77216e-05	0.00240248	33.3333	22.4065
mt-co1	seurat_clusters9	1.60902	0.550638	299624	0.569817	0.00016254	0.00400641	40.3509	30.0813
rbm24a	seurat_clusters9	2.60856	0.544172	304180	0.57848	0.000446686	0.00950244	89.4737	68.1626
