# Supplementary material for: Single-cell transcriptomic profiling of the zebrafish inner ear reveals molecularly distinct hair cell and supporting cell subtypes
Source: eLife. 2023 Jan 4;12:e82978. doi: 10.7554/eLife.82978 (PMC9851615; doi:10.7554/eLife.82978)
Supplement: Supplementary file 5. [file elife-82978-supp5.xlsx]

## Sheet: gene module df res 4e-3 12mod f
	id	module	supermodule	dim_1	dim_2	p_value	morans_test_statistic	morans_I	q_value
1	ERC1	2	2	2.14533	-1.55078	0	37.6314	0.178449	0
2	atp6v1e1b	7	2	-2.0215	-4.23876	1.6e-136	24.8415	0.117666	2.94e-135
3	atp2b1a	3	2	0.266148	-3.14906	0	100.685	0.477976	0
4	snap91b	3	2	2.11017	-1.89109	2.32e-264	34.7152	0.164539	7.41e-263
5	tmem178b	3	2	0.494997	-1.84512	0	54.0207	0.256272	0
6	pcloa	3	2	-0.101127	-2.38206	4.49e-180	28.5899	0.135477	1.04e-178
7	gnai1	3	2	0.795062	-3.45079	4.7e-208	30.7585	0.145795	1.21e-206
8	shisal1a	4	2	1.12939	-0.336803	4.75e-278	35.6109	0.168753	1.61e-276
9	acot17	2	2	1.94029	-0.621337	4.71e-60	16.3029	0.0767896	5.23e-59
10	cd9b	8	1	-1.72794	7.22397	0	64.7715	0.307025	0
11	dock4b	2	2	2.75936	-1.44587	3.58e-59	16.1784	0.0765153	3.95e-58
12	rpl18a	10	3	-8.2244	-3.22872	1.86e-276	35.5078	0.168352	6.29e-275
13	ano2b	3	2	1.53535	-1.37695	0	72.6473	0.344744	0
14	btg1	8	1	-2.61495	6.377	3.23e-116	22.8856	0.108405	5.29e-115
15	nrcama	2	2	3.97992	-3.01855	0	53.8151	0.255167	0
16	magi2a	1	1	1.04032	4.27631	1.74e-146	25.747	0.121953	3.41e-145
17	lamb1b	4	2	1.45059	-0.0333581	3.34e-269	35.0347	0.165147	1.09e-267
18	dennd5b	2	2	2.33428	-1.60435	2.05e-143	25.4714	0.120679	3.94e-142
19	sbf1	2	2	3.16588	-1.92486	3.5e-242	33.213	0.157451	1.01e-240
20	tmcc3	2	2	2.66629	-1.02617	1.07e-168	27.6595	0.131025	2.34e-167
21	pdzrn4	3	2	-0.14641	-1.52109	8.5e-191	29.4398	0.139403	2.04e-189
22	ndufa12	6	2	-2.4521	-4.83868	2.12e-158	26.7898	0.126922	4.39e-157
23	kcnc2	4	2	1.25242	0.0953703	4.24e-91	20.2071	0.0948413	5.98e-90
24	uhrf1bp1l	2	2	2.89876	-2.60995	0	40.0702	0.190018	0
25	celf2	1	1	2.57151	5.5455	4.68e-214	31.2041	0.147707	1.23e-212
26	ptprz1b	9	1	-1.10019	6.62438	0	72.9631	0.346052	0
27	ldhba	6	2	-3.22704	-4.43352	7.68e-96	20.7392	0.0981842	1.12e-94
28	kcnd2	1	1	2.13383	3.13704	1.54e-229	32.3254	0.153073	4.24e-228
29	si:ch211-152c2.3	6	2	-3.89069	-4.79121	3.36e-104	21.6454	0.102508	5.16e-103
30	gata3	4	2	-1.26459	0.605242	1.88e-75	18.3431	0.086708	2.38e-74
31	atp5f1c	6	2	-3.37841	-4.72168	3.49e-100	21.2147	0.100435	5.23e-99
32	plxna4	2	2	3.31046	-3.01114	0	85.3321	0.40506	0
33	iqsec3a	1	1	3.43602	5.11262	6.26e-89	19.959	0.093925	8.74e-88
34	syt1a	1	1	3.47107	5.07724	9.61e-71	17.7439	0.0837343	1.18e-69
35	btbd11a	11	2	-1.38517	-1.4316	2.57e-121	23.3921	0.110645	4.35e-120
36	mtpn	6	2	-3.45838	-4.35389	1.23e-109	22.2149	0.105148	1.96e-108
37	pawr	1	1	0.725783	5.12523	6.21e-69	17.5081	0.0828235	7.5e-68
38	ndufa5	6	2	-2.62444	-4.84576	3.18e-136	24.8138	0.117543	5.83e-135
39	meig1	6	2	-2.58069	-4.44493	1.51e-249	33.7193	0.159814	4.53e-248
40	sox5	9	1	0.532088	6.27282	2.99e-101	21.33	0.100938	4.52e-100
41	cry1a	5	2	2.17713	-4.3098	3.17e-103	21.5417	0.101958	4.85e-102
42	tafa5a	9	1	-1.17668	6.31166	1.42e-61	16.5155	0.0770579	1.6e-60
43	rps16	10	3	-8.24306	-3.27313	2.52e-248	33.6358	0.159464	7.45e-247
44	bik	12	4	-8.81312	3.37707	4.86e-56	15.728	0.06977	5.22e-55
45	celsr1a	2	2	2.32543	-0.404654	3.92e-95	20.6607	0.0978399	5.67e-94
46	ppfia2	1	1	3.42127	5.12191	1.28e-54	15.5195	0.0730884	1.36e-53
47	camk1da	3	2	1.78573	-2.03683	1.86e-77	18.5921	0.0879573	2.4e-76
48	grip1	2	2	2.35889	-0.454994	1.51e-152	26.2827	0.124544	3.06e-151
49	snd1	1	1	1.61312	5.10239	5.64e-53	15.2747	0.0722298	5.91e-52
50	CABZ01117780.1	2	2	2.61921	-1.13256	4.09e-66	17.1347	0.0807988	4.82e-65
51	rab3ip	7	2	-1.88173	-3.51913	2.63e-60	16.3384	0.0772827	2.93e-59
52	CABZ01020840.1	12	4	-8.92349	3.46903	1.37e-122	23.5169	0.106217	2.34e-121
53	DGKI	4	2	-0.429606	0.494383	2.68e-67	17.2925	0.0817009	3.18e-66
54	phlda1	7	2	-2.73358	-3.08677	3.36e-160	26.9439	0.127271	7e-159
55	zfhx3	1	1	1.86851	4.38332	2.99e-113	22.5858	0.106978	4.83e-112
56	CABZ01083442.1	7	2	-0.139764	-3.70153	3.57e-72	17.9279	0.0846893	4.42e-71
57	mfap3l	7	2	-0.790944	-3.81587	3.12e-304	37.2642	0.176686	1.17e-302
58	bdnf	7	2	-1.29133	-3.22722	0	54.8358	0.260166	0
59	got2b	6	2	-2.93433	-4.33531	1.66e-56	15.796	0.0746585	1.79e-55
60	syt7b	9	1	0.00451318	6.70695	2.7e-140	25.1882	0.119237	5.09e-139
61	dnajb6b	5	2	1.83789	-4.90171	1.7e-189	29.3381	0.138987	4.06e-188
62	stk33	4	2	0.817697	-0.0065363	7.96e-84	19.3627	0.0915261	1.07e-82
63	pcdh7b	1	1	1.16436	4.60768	0	50.6956	0.240511	0
64	adcy7	9	1	0.178145	6.60538	2.61e-146	25.7313	0.121717	5.09e-145
65	pde5ab	11	2	-1.21373	-1.49514	4.56e-232	32.5048	0.153882	1.27e-230
66	rassf7b	9	1	-0.13529	5.75994	9.43e-133	24.4901	0.116012	1.7e-131
67	dusp19b	9	1	-0.828523	6.47892	3.63e-63	16.7352	0.0790652	4.17e-62
68	kcnj10a	8	1	-2.20561	7.05891	1.37e-75	18.36	0.0838162	1.75e-74
69	madd	3	2	1.3468	-2.66603	5.74e-123	23.5538	0.111568	9.83e-122
70	pnp5a	9	1	-1.26857	6.18366	4.27e-141	25.2612	0.119082	8.07e-140
71	lgr4	1	1	0.81051	4.86398	3.3e-88	19.8758	0.0940742	4.58e-87
72	dennd2b	9	1	-0.124975	6.29949	7.27e-94	20.5191	0.0970654	1.04e-92
73	cxcl8b.1	12	4	-8.87798	3.42568	2.27e-76	18.4574	0.0824242	2.91e-75
74	CT030129.1	5	2	2.50136	-3.2909	0	51.2583	0.24309	0
75	PAMR1	11	2	-1.53992	-1.53726	3.28e-132	24.4392	0.114969	5.92e-131
76	nlgn2a	1	1	3.41853	5.11479	1.02e-67	17.3479	0.0817303	1.22e-66
77	cdh1	9	1	0.15213	5.98493	6.24e-240	33.0567	0.15655	1.78e-238
78	calml4a	6	2	-2.77049	-4.02472	0	42.4037	0.201068	0
79	fgf11a	2	2	4.19964	-3.323	0	39.4761	0.18696	0
80	mllt3	11	2	-1.34675	-1.33621	0	41.9861	0.1991	0
81	fhod1	2	2	2.44751	-2.53293	0	51.566	0.244615	0
82	ank2b	1	1	2.0076	5.85067	8.07e-187	29.1274	0.13797	1.91e-185
83	si:ch73-335l21.4	8	1	-2.63806	6.26342	4.67e-303	37.1916	0.176061	1.75e-301
84	her8a	8	1	-2.25355	6.60625	1.36e-61	16.5179	0.0777538	1.54e-60
85	slc9a5	2	2	4.1756	-3.37791	0	41.9384	0.198609	0
86	dvl2	9	1	-1.17864	6.5758	8.91e-68	17.3559	0.0818391	1.07e-66
87	slc39a13	2	2	4.13693	-3.4362	4.3e-71	17.789	0.0839884	5.27e-70
88	VSTM2B	2	2	4.1895	-2.78977	9.24e-303	37.1732	0.175849	3.45e-301
89	chrna7	8	1	-1.03103	7.90877	0	68.263	0.321685	0
90	uqcrfs1	6	2	-2.47407	-4.65545	4.91e-93	20.426	0.0967001	7.02e-92
91	neo1a	1	1	1.52798	4.87552	0	47.8801	0.22711	0
92	gabarapb	6	2	-3.69439	-4.77726	5.39e-62	16.5738	0.0784088	6.11e-61
93	rps17	3	2	0.0107718	-2.15424	1.37e-122	23.5168	0.111329	2.34e-121
94	kirrel1a	1	1	1.7901	5.76451	1.34e-135	24.7557	0.117014	2.46e-134
95	tead1b	1	1	1.36685	5.44704	4.31e-105	21.7398	0.102939	6.66e-104
96	nfatc3a	3	2	1.87615	-2.07675	7.16e-180	28.5736	0.135415	1.65e-178
97	snrpf	6	2	-4.62689	-4.08254	3.54e-92	20.3294	0.0961554	5.02e-91
98	ccdc102a	4	2	1.22944	-0.388713	3.69e-254	34.0325	0.161343	1.13e-252
99	otog	9	1	-0.106015	6.73966	0	85.6702	0.406518	0
100	CU467822.2	1	1	2.61681	5.46777	1.09e-122	23.5267	0.110944	1.86e-121
101	gpt2	2	2	4.24744	-3.31665	1.35e-62	16.6566	0.0786565	1.55e-61
102	per1b	5	2	1.42486	-4.58814	0	39.1168	0.185495	0
103	znf536	5	2	2.46576	-3.08444	0	81.1808	0.385332	0
104	cd81a	8	1	-1.96313	6.89804	5.73e-286	36.1189	0.171193	1.99e-284
105	hsbp1a	6	2	-4.20314	-4.03989	9.18e-112	22.4339	0.106035	1.47e-110
106	chsy1	1	1	1.24734	3.86091	4.25e-120	23.2721	0.11023	7.15e-119
107	creb3l1	4	2	1.22563	0.0683377	4.68e-202	30.3067	0.143198	1.18e-200
108	exoc6b	2	2	3.8583	-3.48831	9.6e-97	20.8389	0.0986275	1.41e-95
109	aldh1a3	1	1	0.663566	5.56351	7.28e-175	28.1677	0.133427	1.64e-173
110	galnt18b	4	2	1.66899	-0.225586	4e-232	32.5088	0.154122	1.12e-230
111	si:dkey-19b23.13	3	2	-0.413716	-2.0122	0	38.9263	0.18454	0
112	dpy19l3	4	2	1.75961	-0.321932	4.84e-65	16.9903	0.0803787	5.66e-64
113	fam189a1	1	1	3.23798	5.28377	7.53e-52	15.1048	0.0712456	7.83e-51
114	col4a6	1	1	1.29683	5.63735	0	51.3991	0.243615	0
115	si:dkey-172h23.2	1	1	1.33457	4.46631	6.08e-133	24.508	0.116081	1.1e-131
116	dgkza	4	2	1.1259	0.270248	5.27e-188	29.2209	0.138459	1.25e-186
117	zgc:103586	7	2	-0.183111	-4.06096	1.27e-68	17.4674	0.0825606	1.53e-67
118	mrvi1	4	2	0.9262	1.65069	0	55.939	0.263411	0
119	si:ch211-186j3.6	4	2	0.975702	1.06754	8.01e-84	19.3624	0.091426	1.08e-82
120	rpl34	10	3	-8.0917	-3.26884	9.45e-198	29.9782	0.142094	2.34e-196
121	pygmb	7	2	-1.01775	-3.80467	1.61e-219	31.6043	0.149782	4.29e-218
122	col4a5	1	1	1.45812	5.84516	1.17e-116	22.9298	0.108347	1.93e-115
123	tbc1d14	7	2	-1.85819	-3.51526	1.17e-154	26.4667	0.125354	2.39e-153
124	strc1	2	2	3.87319	-2.14178	6.73e-96	20.7455	0.0975875	9.81e-95
125	cd99l2	4	2	0.790577	1.73023	1.06e-202	30.3554	0.143588	2.69e-201
126	adamts18	8	1	-0.88144	7.98574	2.74e-246	33.4961	0.157941	8.07e-245
127	arnt2	2	2	2.34589	-0.75808	2.1e-174	28.13	0.133322	4.72e-173
128	BX005003.1	3	2	1.74992	-2.17402	0	79.8626	0.379075	0
129	TESK1	3	2	1.42239	-2.06389	1.29e-64	16.9328	0.0800626	1.5e-63
130	gal3st3	4	2	0.264969	0.520801	0	51.7213	0.245387	0
131	si:ch211-168d1.3	1	1	0.787152	4.78172	1.9e-85	19.5541	0.0924026	2.6e-84
132	rbpms2b	2	2	4.27932	-2.5946	4.15e-128	24.0503	0.113398	7.34e-127
133	igdcc3	1	1	1.64796	4.8755	8.67e-87	19.711	0.0931853	1.19e-85
134	cdh11	1	1	0.981826	5.67066	2.1e-106	21.8781	0.103547	3.28e-105
135	sorcs2	2	2	2.05025	-0.0639005	1.12e-214	31.25	0.148143	2.94e-213
136	ndrg2	9	1	0.621265	6.17263	2.8e-94	20.5655	0.0973286	4.02e-93
137	oaz2b	5	2	1.7272	-3.74724	1.98e-127	23.9852	0.113473	3.5e-126
138	cacnb2a	4	2	-0.0871857	0.340169	6.65e-52	15.1129	0.0711749	6.92e-51
139	clcn3	2	2	2.91437	-2.34086	6.06e-107	21.9347	0.10388	9.47e-106
140	rps13	10	3	-7.95783	-3.83351	0	37.8599	0.179533	0
141	nhsl2	1	1	1.75062	5.979	2.57e-219	31.5896	0.149365	6.83e-218
142	nfat5b	3	2	1.87083	-1.64431	0	43.0524	0.204159	0
143	hmgb3a	6	2	-3.49093	-3.56739	1.05e-59	16.2537	0.0768608	1.16e-58
144	rps4x	10	3	-8.16363	-3.37947	2.22e-271	35.1774	0.166788	7.35e-270
145	eml3	2	2	3.9704	-3.53035	4.69e-260	34.4287	0.162984	1.47e-258
146	si:dkey-172j4.3	4	2	-0.958799	0.794143	0	78.3429	0.371362	0
147	glceb	2	2	3.1562	-2.30588	8.52e-95	20.623	0.0976337	1.23e-93
148	plekha7b	1	1	0.705337	5.2162	3.74e-123	23.572	0.111619	6.41e-122
149	sox6	1	1	1.20147	5.22908	0	65.2991	0.309777	0
150	tox3	5	2	2.31659	-3.16292	3.53e-215	31.2868	0.148293	9.29e-214
151	rpl13	10	3	-7.77967	-3.77296	6.42e-269	35.016	0.166023	2.09e-267
152	rplp2l	10	3	-7.9972	-3.271	0	43.5261	0.206437	0
153	slc25a22b	8	1	-1.46326	7.55402	0	87.7343	0.416004	0
154	sall1a	4	2	-1.0391	0.281801	0	38.1738	0.180751	0
155	mybpc3	4	2	1.01364	1.20964	7.52e-123	23.5423	0.111008	1.29e-121
156	cmtm4	5	2	2.67731	-3.56181	5.59e-95	20.6434	0.0977068	8.1e-94
157	mfge8a	2	2	3.58457	-3.00706	7.68e-64	16.8275	0.0794782	8.86e-63
158	ptprn2	2	2	2.85653	-0.791885	5.99e-306	37.3701	0.17703	2.27e-304
159	pde3b	2	2	2.19583	-0.289385	3.25e-81	19.0506	0.0901908	4.3e-80
160	dnah2	3	2	0.408159	-1.00944	3.5e-168	27.6168	0.130862	7.59e-167
161	nat16	7	2	-1.69452	-3.41521	1.58e-123	23.6084	0.111823	2.72e-122
162	skor1a	3	2	-0.594109	-2.51069	0	51.2527	0.243041	0
163	si:ch211-288d18.1	2	2	3.57783	-2.71812	7.61e-114	22.6462	0.10718	1.23e-112
164	tub	3	2	1.21052	-2.78107	3.62e-225	32.0128	0.151739	9.85e-224
165	lmo1	4	2	0.845083	1.39349	2.16e-54	15.4858	0.0731216	2.29e-53
166	ap1s1	6	2	-3.62914	-4.15815	6.94e-183	28.8151	0.136481	1.62e-181
167	brsk2b	1	1	3.09728	5.34988	2.69e-160	26.9522	0.127665	5.61e-159
168	CR356242.1	2	2	4.08738	-2.83372	0	64.9253	0.307869	0
169	iqgap1	1	1	0.592618	5.65625	4.16e-75	18.2997	0.0864242	5.26e-74
170	myo9aa	1	1	1.28209	5.70666	2.34e-250	33.7744	0.159964	7.06e-249
171	kcng4b	4	2	-0.999404	0.366849	2.24e-64	16.9003	0.0787098	2.6e-63
172	abhd2a	4	2	1.50322	-0.0408859	3.5e-54	15.4549	0.0730456	3.7e-53
173	efnb3b	1	1	2.69977	5.37139	3.93e-179	28.514	0.134945	9.03e-178
174	gramd2aa	3	2	1.30236	-0.779388	0	44.5135	0.21109	0
175	strc	2	2	2.73274	-2.99849	0	125.35	0.595169	0
176	ccdc149a	3	2	1.92238	-1.62528	5.08e-185	28.9851	0.137336	1.2e-183
177	ppp1r15a	5	2	2.28309	-5.05632	0	41.75	0.198002	0
178	etnppl	4	2	-0.639448	0.110083	0	42.7165	0.202093	0
179	furina	2	2	2.54319	-0.456143	4.01e-74	18.1758	0.0860283	5.04e-73
180	CABZ01057496.1	2	2	3.12592	-1.77217	5.27e-63	16.713	0.0789135	6.04e-62
181	CR384075.1	1	1	1.70206	3.89626	4.25e-92	20.3203	0.0961833	6.03e-91
182	si:dkey-251i10.2	8	1	-1.65793	7.5891	3.69e-59	16.1765	0.0759436	4.07e-58
183	tagln2	9	1	-1.38197	6.28673	2.81e-79	18.8156	0.0886426	3.68e-78
184	srrm4	11	2	-1.27392	-1.31299	0	64.6972	0.306985	0
185	hmgn7	6	2	-4.09255	-4.25465	2.35e-55	15.6279	0.0739025	2.51e-54
186	sat1a.2	5	2	2.30417	-5.66537	0	38.2046	0.181152	0
187	KCNT1	2	2	2.93662	-1.62701	1.49e-233	32.6098	0.154408	4.18e-232
188	barhl1a	4	2	-1.23628	0.787523	1.02e-100	21.2723	0.100227	1.54e-99
189	zbtb20	3	2	1.26836	-2.18267	0	38.1766	0.181047	0
190	atp6v1g1	6	2	-3.02372	-4.27904	1.49e-63	16.7883	0.079401	1.71e-62
191	xbp1	8	1	-2.76945	6.15049	1.56e-130	24.2808	0.115027	2.8e-129
192	CFAP77	7	2	-2.27024	-4.12585	8.32e-59	16.1264	0.0762101	9.15e-58
193	nexmifa	3	2	-0.39626	-2.92706	2.93e-123	23.5823	0.111675	5.04e-122
194	znrf3	1	1	1.08365	5.13949	4.95e-99	21.0896	0.0998487	7.36e-98
195	myo1ha	4	2	-1.04227	0.746315	0	58.3395	0.275964	0
196	si:ch73-138i16.1	5	2	1.75944	-3.731	0	81.2596	0.385547	0
197	rpl7a	10	3	-7.92648	-4.00737	0	39.6156	0.187875	0
198	tmem132e	1	1	2.14425	5.00268	1.44e-202	30.3454	0.143614	3.64e-201
199	atp1b2b	7	2	-0.590989	-3.48123	0	98.6657	0.468405	0
200	arvcfb	1	1	1.99986	4.50916	2.5e-226	32.0961	0.151924	6.82e-225
201	kremen1	9	1	0.234124	6.45721	0	60.8501	0.288719	0
202	nsmfb	4	2	0.856999	1.57696	1.54e-263	34.6608	0.163884	4.89e-262
203	abca2	2	2	3.18246	-2.45455	0	46.0475	0.218411	0
204	notch1b	1	1	1.40709	5.14519	1.31e-152	26.2881	0.124509	2.65e-151
205	tnc	2	2	3.21669	-2.13158	0	77.2845	0.366822	0
206	edil3a	1	1	2.10709	3.49255	5.74e-178	28.4199	0.134189	1.31e-176
207	atp2a3	2	2	3.65718	-3.3505	0	121.25	0.57565	0
208	ttll11	3	2	-0.232821	-1.32614	1.77e-196	29.8803	0.14154	4.36e-195
209	cox7c	6	2	-2.52416	-4.91185	0	49.8543	0.236523	0
210	dab2ipb	9	1	0.352037	6.20412	1.58e-94	20.5932	0.0974085	2.28e-93
211	RNF224	3	2	1.03783	-3.53594	2.87e-123	23.5832	0.111662	4.93e-122
212	galnt9	2	2	2.51959	-1.63651	0	70.6275	0.335144	0
213	TMEM8B	2	2	3.05169	-1.91409	0	39.9318	0.189349	0
214	fbrsl1	2	2	2.19089	-0.435734	1.31e-151	26.2006	0.124154	2.63e-150
215	UNC5C	2	2	2.91057	-2.13707	1.59e-110	22.3066	0.105579	2.54e-109
216	cryabb	8	1	-2.13286	6.68257	2.64e-113	22.5912	0.106667	4.27e-112
217	gltpa	2	2	3.1933	-2.83209	0	59.833	0.283785	0
218	bmpr1ba	1	1	1.88208	4.19912	2.45e-101	21.3392	0.10097	3.71e-100
219	anxa1a	12	4	-8.88265	3.42626	7.18e-108	22.0315	0.103481	1.13e-106
220	isl1	8	1	-2.24749	7.22878	1.99e-109	22.1934	0.104864	3.15e-108
221	camkk1a	2	2	1.9881	-0.757104	1.14e-110	22.3218	0.105712	1.81e-109
222	myo1ca	5	2	2.21671	-3.19744	3.09e-290	36.3898	0.172464	1.09e-288
223	ccl19a.1	9	1	-1.12964	7.06907	5.34e-160	26.9268	0.126578	1.11e-158
224	mtmr8	2	2	3.50659	-3.30808	3.43e-233	32.5842	0.154393	9.61e-232
225	rplp0	10	3	-7.85304	-3.93018	3.16e-297	36.8291	0.174638	1.15e-295
226	UBB	5	2	1.68503	-5.54183	0	38.2271	0.181282	0
227	nrarpb	9	1	0.559917	6.13344	1.87e-67	17.3133	0.0816285	2.22e-66
228	capga	2	2	4.03979	-3.50474	0	95.4075	0.45271	0
229	shisa2a	2	2	4.21299	-3.44002	0	81.5974	0.387065	0
230	rabl6b	4	2	-0.338282	-0.0964335	2.05e-67	17.3079	0.0817986	2.44e-66
231	rtn4r	2	2	4.17192	-2.66459	0	96.7247	0.459092	0
232	ubb	5	2	2.13786	-5.23568	0	44.92	0.213043	0
233	gpsm1a	8	1	-1.52651	7.48319	3.42e-62	16.6012	0.0780586	3.88e-61
234	tmc2a	3	2	-0.570168	-2.47808	0	117.157	0.556224	0
235	aif1l	8	1	-2.15543	7.08645	0	55.6558	0.263788	0
236	sh3glb2b	3	2	-0.296893	-3.41268	2.59e-294	36.6466	0.173762	9.32e-293
237	BX465834.1	1	1	2.19348	5.51656	5.54e-233	32.5695	0.154314	1.55e-231
238	kifl	2	2	2.77711	-1.35063	0	45.6851	0.21655	0
239	pcsk5a	3	2	1.23892	-2.64264	0	88.3981	0.419629	0
240	si:dkey-96l17.6	4	2	0.991052	-0.343834	0	54.5826	0.258889	0
241	hexb	5	2	2.27817	-3.47443	8.22e-61	16.4092	0.0775525	9.22e-60
242	whrnb	5	2	2.45516	-3.99909	1.79e-228	32.2494	0.152718	4.93e-227
243	apba1a	3	2	-0.42067	-3.35318	0	55.168	0.261762	0
244	mef2cb	2	2	4.2447	-2.60944	0	42.341	0.200712	0
245	tmc2b	2	2	2.48437	-2.6801	0	79.741	0.378452	0
246	ank1a	2	2	2.46565	-1.51308	2.74e-259	34.3774	0.16295	8.56e-258
247	myhz1.1	1	1	2.21505	4.14527	5.18e-132	24.4205	0.115366	9.35e-131
248	TMC1	5	2	2.47367	-3.44681	0	151.151	0.717705	0
249	emb	7	2	0.174168	-4.0265	0	70.9924	0.336933	0
250	eif4a1b	10	3	-7.50805	-4.06402	6.24e-75	18.2776	0.0864906	7.88e-74
251	dlb	6	2	-4.67189	-3.68135	8.79e-179	28.4858	0.134749	2.02e-177
252	fam102ab	9	1	0.409732	6.05702	3.47e-64	16.8744	0.0798045	4.03e-63
253	adgrv1	3	2	0.432378	-1.19975	0	69.5987	0.330301	0
254	si:dkey-27p23.3	7	2	-2.16884	-4.0912	1.57e-88	19.913	0.0942279	2.19e-87
255	fras1	1	1	1.23277	3.84637	6.49e-89	19.9572	0.0944575	9.05e-88
256	drd2b	2	2	3.56435	-2.58804	1.94e-75	18.3412	0.0865917	2.46e-74
257	arhgef28a	3	2	0.998779	-2.01212	1.1e-200	30.2024	0.14313	2.75e-199
258	atp6v1aa	7	2	-1.74251	-3.77675	2.68e-90	20.1159	0.0951959	3.77e-89
259	acsl4b	2	2	4.05049	-2.90609	6.74e-136	24.7836	0.117356	1.23e-134
260	stip1	5	2	1.87195	-4.96444	4.05e-89	19.9807	0.0945572	5.67e-88
261	eef2l2	5	2	2.00842	-4.86813	1.93e-109	22.1948	0.105048	3.06e-108
262	unc5db	2	2	3.13384	-1.86792	1.88e-139	25.1112	0.118879	3.52e-138
263	arhgef12b	1	1	1.04733	4.9661	1.51e-161	27.0586	0.128123	3.18e-160
264	ncs1a	11	2	-1.38904	-1.4501	0	43.1729	0.204391	0
265	rpl36a	10	3	-7.77717	-4.00027	1.25e-287	36.2245	0.171768	4.39e-286
266	ap3m2	7	2	-2.33712	-4.24699	4.12e-117	22.9752	0.108773	6.8e-116
267	slc8a2a	4	2	0.826654	-0.0142388	0	54.636	0.259104	0
268	coro1ca	1	1	1.00062	5.54147	1.54e-224	31.9676	0.151405	4.17e-223
269	histh1l	10	3	-7.52965	-3.29686	9.99e-80	18.8704	0.0892335	1.31e-78
270	mcama	1	1	2.41215	5.20644	7.98e-103	21.4988	0.101373	1.22e-101
271	btf3	10	3	-7.66889	-3.62823	4.81e-129	24.1396	0.114346	8.56e-128
272	nr2f1a	6	2	-3.58291	-3.13035	3.7e-90	20.0999	0.0948851	5.19e-89
273	si:ch73-280o22.2	1	1	1.28757	4.33512	3.55e-61	16.4601	0.0778216	4e-60
274	fcho2	3	2	1.69654	-1.74118	0	42.8187	0.203101	0
275	slc4a4a	8	1	-0.874406	7.88233	0	47.1143	0.223241	0
276	cfap299	3	2	0.176557	-1.39786	2.7e-53	15.3225	0.0724197	2.83e-52
277	myo1hb	4	2	-1.01343	0.736284	0	40.2419	0.19044	0
278	sema4c	1	1	1.53499	4.10945	9.55e-75	18.2544	0.0863922	1.2e-73
279	sfrp1a	9	1	-1.62377	6.60781	4.97e-82	19.1486	0.0904811	6.61e-81
280	aqp3a	12	4	-8.87963	3.40833	7.16e-169	27.6741	0.12857	1.56e-167
281	wscd2	2	2	2.21391	-0.24463	2.51e-65	17.0287	0.0805698	2.95e-64
282	si:dkey-35m8.1	1	1	0.838635	4.90238	3.66e-261	34.5027	0.163328	1.16e-259
283	aspa	2	2	3.24221	-3.2999	4.78e-94	20.5395	0.0971127	6.87e-93
284	tbx1	4	2	0.861477	1.78805	0	61.2179	0.29003	0
285	zmat4a	3	2	2.24324	-2.39069	0	85.6254	0.406443	0
286	atp5meb	6	2	-3.25833	-4.4387	4e-114	22.6744	0.107385	6.51e-113
287	tcima	6	2	-3.39425	-3.19453	8.04e-110	22.2341	0.105249	1.28e-108
288	rpl12	10	3	-7.69446	-3.76267	2.5e-235	32.7347	0.155186	7.07e-234
289	gal3st1a	3	2	-0.476561	-3.22931	0	42.5926	0.202016	0
290	gcnt4a	7	2	-1.81304	-4.36591	0	41.4801	0.196662	0
291	si:dkey-40c11.2	11	2	-0.922262	-1.40379	5.2e-173	28.0159	0.132701	1.16e-171
292	OSBP2	3	2	0.402657	-1.79642	3.31e-139	25.0886	0.118774	6.2e-138
293	atp8b5a	2	2	3.91806	-2.82717	0	55.2928	0.262212	0
294	atp5l	6	2	-3.48783	-4.93413	1.86e-141	25.2941	0.119842	3.52e-140
295	tecta	9	1	-0.533863	6.12563	0	61.3524	0.290822	0
296	iqgap2	2	2	2.51874	-1.56089	3.1e-120	23.2857	0.110137	5.21e-119
297	sh2d3cb	8	1	-0.982567	7.96343	2.44e-130	24.2625	0.112353	4.36e-129
298	ENSDARG00000041723	3	2	0.00529167	-1.66025	1.25e-298	36.9167	0.174816	4.57e-297
299	ar	2	2	3.6296	-3.00375	4.32e-55	15.5891	0.0736783	4.6e-54
300	tescb	7	2	-0.578826	-4.05733	1.58e-148	25.9287	0.122805	3.13e-147
301	camk2b1	4	2	0.803151	0.298	1.45e-149	26.0204	0.123265	2.89e-148
302	ap1b1	3	2	-0.426717	-3.26204	1.87e-114	22.708	0.107545	3.04e-113
303	ophn1	2	2	3.94742	-3.42883	4.72e-82	19.1513	0.0905815	6.28e-81
304	tbx2a	6	2	-3.09489	-3.92466	5.76e-69	17.5125	0.0828309	6.95e-68
305	col27a1b	1	1	1.45915	5.80442	0	40.8866	0.193546	0
306	spns2	1	1	1.05675	5.11445	7.86e-130	24.2143	0.114647	1.4e-128
307	tmem232	4	2	0.969363	1.4954	8.31e-66	17.0934	0.0805819	9.79e-65
308	zdhhc15a	4	2	-1.08492	0.855239	0	53.6564	0.252862	0
309	CR936408.1	7	2	-2.2677	-3.03708	0	43.7668	0.2014	0
310	fgf10b	4	2	-1.1092	0.741557	0	44.8016	0.211196	0
311	GARNL3	3	2	1.06566	-1.27678	0	40.6917	0.19298	0
312	slc1a3a	9	1	-0.931495	6.99178	0	56.6818	0.2689	0
313	zgc:114041	5	2	2.8678	-3.38496	6.27e-79	18.7731	0.0887717	8.16e-78
314	C5H11orf1	7	2	-1.86075	-3.55093	0	39.486	0.18719	0
315	brinp1	2	2	3.75663	-3.25779	0	57.253	0.271554	0
316	dcc	1	1	2.9544	5.44259	5.28e-80	18.9041	0.0889573	6.93e-79
317	zgc:153704	8	1	-1.31979	7.71513	9.95e-196	29.8226	0.140808	2.44e-194
318	KCNAB3	4	2	0.966821	1.58746	1.56e-163	27.2268	0.128569	3.32e-162
319	zgc:158463	3	2	1.20402	-4.0976	0	84.7685	0.402354	0
320	zgc:158343	8	1	-2.56903	6.3403	5.77e-254	34.0193	0.160773	1.76e-252
321	mctp1a	2	2	2.45388	-2.23781	0	88.6181	0.420668	0
322	ABR	3	2	1.24052	-2.20904	9.03e-145	25.5934	0.121217	1.75e-143
323	sgsm1a	2	2	3.3931	-3.24595	6.85e-59	16.1384	0.0762162	7.54e-58
324	hspa5	5	2	1.97708	-5.88301	1.11e-74	18.2464	0.0863524	1.39e-73
325	hk2	5	2	2.69273	-5.1828	2.57e-136	24.8224	0.117583	4.71e-135
326	bicdl2	5	2	2.61122	-5.59379	1.35e-60	16.3792	0.0774566	1.5e-59
327	CABZ01084961.1	3	2	1.66524	-2.13395	2.82e-157	26.6932	0.126468	5.81e-156
328	tbc1d16	3	2	0.666344	-1.23965	1.13e-85	19.5808	0.0926725	1.54e-84
329	ndufa4l	6	2	-2.24938	-4.87846	0	54.9138	0.260562	0
330	tmc5	2	2	2.3299	-2.53786	0	80.8441	0.383712	0
331	rpl3	10	3	-8.26839	-3.34648	1.24e-191	29.5049	0.139844	3e-190
332	rpl27	10	3	-8.15176	-3.45714	1.61e-259	34.3929	0.163059	5.03e-258
333	rbx1	6	2	-3.42466	-4.82466	8.61e-61	16.4064	0.0776005	9.65e-60
334	nfixb	3	2	1.37494	-1.96396	0	60.5628	0.2874	0
335	rapgefl1	11	2	-0.975938	-1.13548	0	47.8833	0.226888	0
336	si:dkeyp-72e1.9	2	2	3.75024	-3.52855	7.8e-283	35.9187	0.170038	2.7e-281
337	si:dkeyp-72e1.6	2	2	4.14924	-3.51225	7.88e-269	35.0102	0.165651	2.56e-267
338	pdxdc1	2	2	3.88216	-3.17739	4.12e-127	23.9548	0.11336	7.25e-126
339	triobpb	11	2	-0.576473	-1.92101	1.15e-122	23.5244	0.111358	1.96e-121
340	bcat2	7	2	-0.216218	-3.98538	2.64e-191	29.4794	0.13968	6.36e-190
341	nr1d1	5	2	1.51696	-4.71621	4.75e-90	20.0874	0.095062	6.67e-89
342	ddx5	5	2	1.97805	-5.91801	2.37e-240	33.0859	0.156865	6.78e-239
343	ndufa6	6	2	-2.53494	-4.65209	3.04e-100	21.2213	0.100477	4.56e-99
344	smdt1a	7	2	-2.26345	-4.4475	5.98e-84	19.3775	0.0916753	8.06e-83
345	igf2bp1	1	1	2.08355	4.49484	2.18e-122	23.4972	0.111189	3.71e-121
346	cabp5b	7	2	-2.36917	-3.18146	0	88.4573	0.418489	0
347	slc6a16a	2	2	4.15735	-3.43239	1.16e-96	20.8299	0.0984438	1.7e-95
348	atp5mc1	6	2	-3.12879	-4.81757	1.21e-172	27.9858	0.132612	2.7e-171
349	SRCIN1	2	2	2.18503	-0.420609	7.45e-56	15.7009	0.0742779	7.98e-55
350	arf2a	7	2	-1.507	-3.7782	3.92e-203	30.3883	0.144037	9.94e-202
351	fthl27	2	2	2.90333	-2.89352	0	63.6184	0.301867	0
352	fthl31	11	2	-0.867994	-1.78918	2.32e-67	17.3009	0.0816084	2.76e-66
353	mybpc2a	2	2	4.2163	-3.37233	0	89.842	0.426087	0
354	usp43b	9	1	-0.76707	7.36155	1.07e-75	18.3734	0.0863415	1.37e-74
355	dnase1	9	1	-1.21282	6.39391	4e-105	21.7433	0.102067	6.18e-104
356	rps11	10	3	-7.8383	-4.07827	0	39.9279	0.189367	0
357	asic2	4	2	1.27014	-0.0424572	3.07e-283	35.9447	0.170338	1.06e-281
358	sox10	8	1	-2.09432	6.5836	1.19e-116	22.9291	0.108473	1.95e-115
359	gys1	3	2	0.88544	-3.46117	2.88e-86	19.6502	0.0929837	3.95e-85
360	rbfox1	1	1	3.36596	5.15246	2.12e-138	25.0146	0.11833	3.94e-137
361	svilc	3	2	0.567701	-2.099	1.35e-161	27.0628	0.128151	2.84e-160
362	il12rb2l	5	2	2.31752	-4.98772	1.38e-60	16.3778	0.0774322	1.54e-59
363	si:dkey-16p21.8	7	2	-2.39485	-3.27797	8.81e-188	29.2033	0.138237	2.09e-186
364	prr15la	6	2	-3.53633	-4.11026	6.9e-150	26.049	0.12333	1.37e-148
365	atf4b	5	2	1.98136	-5.9058	5.54e-135	24.6986	0.117017	1.01e-133
366	stk17al	4	2	0.830143	-0.178262	5.44e-291	36.4374	0.172618	1.93e-289
367	si:ch211-232p21.6	3	2	0.839889	-2.50766	3.25e-91	20.2202	0.0945934	4.59e-90
368	atp6v0a1a	3	2	0.0895369	-2.83195	0	46.7882	0.221933	0
369	CU464118.1	1	1	1.91965	5.38581	1.01e-158	26.8174	0.126742	2.1e-157
370	hspbp1	5	2	1.84756	-4.93039	1.87e-80	18.9586	0.0896607	2.47e-79
371	mvp	5	2	2.72603	-5.4326	1.37e-54	15.515	0.0733016	1.45e-53
372	aldoaa	6	2	-3.02699	-4.30642	1.22e-71	17.8597	0.0845153	1.5e-70
373	baiap2l2a	2	2	2.93594	-3.04064	0	51.4621	0.244094	0
374	2022-09-12	9	1	0.46111	6.06877	4.35e-251	33.8242	0.160188	1.31e-249
375	stat3	2	2	3.02581	-0.532065	4.21e-299	36.9461	0.175204	1.55e-297
376	si:ch211-195b15.8	5	2	2.0606	-4.49776	0	42.616	0.202098	0
377	myo15aa	3	2	1.87375	-1.88813	0	86.5704	0.410942	0
378	si:ch211-76l23.4	12	4	-8.88609	3.43278	2.28e-70	17.6953	0.0708127	2.78e-69
379	si:ch211-210g13.5	1	1	1.58696	5.23148	2.69e-67	17.2924	0.0816063	3.19e-66
380	wnk4b	8	1	-0.891106	7.92233	1.43e-161	27.0608	0.128038	3e-160
381	arl6ip1	7	2	-0.240572	-4.22995	0	46.7406	0.221721	0
382	junbb	8	1	-2.09708	6.00051	1.36e-186	29.1095	0.137932	3.22e-185
383	hsp70.3	5	2	1.78043	-5.61909	0	54.8625	0.260312	0
384	atp5mf	6	2	-3.39418	-4.79531	1.77e-136	24.8375	0.117666	3.24e-135
385	hsp70.2	5	2	2.06083	-5.11373	0	81.2602	0.385724	0
386	hsp70.1	5	2	1.94178	-5.22761	0	71.8385	0.34096	0
387	tanc2a	2	2	2.13256	-0.683845	6.43e-285	36.0519	0.170956	2.23e-283
388	actb2	10	3	-7.51205	-3.75518	1.67e-165	27.3927	0.129819	3.59e-164
389	cacna1ia	2	2	3.35464	-2.49512	0	74.4518	0.353242	0
390	hdac5	2	2	3.15288	-1.63567	3.14e-141	25.2734	0.119706	5.94e-140
391	si:dkey-16l2.17	6	2	-4.72459	-3.98251	1.69e-211	31.015	0.146816	4.4e-210
392	lfng	8	1	-1.61094	6.77395	0	56.4935	0.267734	0
393	mafk	9	1	-0.517309	5.8139	3.46e-82	19.1675	0.0905502	4.6e-81
394	cbx7a	5	2	1.97338	-5.26252	6.94e-125	23.7402	0.11244	1.2e-123
395	tlcd4b	3	2	-0.100874	-1.98654	1.11e-141	25.3143	0.119868	2.11e-140
396	micall2a	3	2	-0.390752	-1.43759	4.44e-246	33.4818	0.158597	1.3e-244
397	rnd2	2	2	2.85812	-3.10729	1.68e-69	17.5822	0.0830492	2.04e-68
398	sdk1a	3	2	1.62051	-0.711559	8.28e-275	35.4009	0.167855	2.79e-273
399	hsd3b7	5	2	2.67083	-3.17066	0	67.2399	0.319077	0
400	zfand2a	5	2	1.97272	-4.95339	1.94e-55	15.64	0.07394	2.07e-54
401	gna12a	9	1	-0.56206	7.21217	5.49e-76	18.4097	0.0869096	7e-75
402	zgc:92162	8	1	-2.18182	6.93044	1.94e-224	31.9603	0.149777	5.26e-223
403	mylpfa	1	1	2.21312	4.12882	7.06e-86	19.6046	0.0926093	9.68e-85
404	atp6v0ca	7	2	-0.811465	-3.97639	2.52e-280	35.7576	0.169553	8.65e-279
405	sept9a	2	2	3.15217	-2.65851	6.82e-131	24.3149	0.115147	1.22e-129
406	arl5c	8	1	-2.06912	5.93467	7.68e-54	15.4041	0.0727977	8.09e-53
407	col1a1a	1	1	2.17386	6.65558	9.9e-184	28.8825	0.136253	2.32e-182
408	cacnb1	11	2	-1.38537	-1.41132	8.98e-104	21.6	0.102076	1.38e-102
409	hs3st4	4	2	0.981927	0.415609	1.95e-119	23.2067	0.109553	3.27e-118
410	baiap3	11	2	-1.31358	-1.52389	0	53.0415	0.251162	0
411	tob1a	5	2	1.97631	-5.94127	1.06e-62	16.6715	0.0788859	1.21e-61
412	h3f3b.1	6	2	-3.98783	-4.25537	5.71e-54	15.4233	0.0729452	6.02e-53
413	shisa9b	4	2	1.06146	1.30889	4.9e-62	16.5796	0.077789	5.56e-61
414	rps15a	10	3	-8.08922	-3.32579	2.56e-277	35.5636	0.168615	8.69e-276
415	cdip1	5	2	2.07669	-4.84125	3.06e-142	25.3651	0.120106	5.85e-141
416	rpl19	10	3	-8.10735	-3.80592	1.83e-285	36.0868	0.171113	6.35e-284
417	xylt1	5	2	2.30907	-3.09896	0	60.8365	0.28868	0
418	rps2	10	3	-8.05313	-3.36015	0	38.1214	0.180772	0
419	elavl3	1	1	3.00567	5.42268	0	55.326	0.26137	0
420	rpl23	10	3	-7.85904	-3.93677	0	38.9631	0.184776	0
421	ndufb10	6	2	-2.84896	-4.87539	2.76e-84	19.4171	0.0918977	3.74e-83
422	prkcbb	3	2	0.666255	-1.42081	0	54.1072	0.256707	0
423	tnrc6a	3	2	-0.252635	-3.34402	2.05e-60	16.3537	0.0773742	2.28e-59
424	ndufab1b	6	2	-2.89465	-4.84443	3.72e-80	18.9225	0.0895408	4.89e-79
425	baiap2a	9	1	0.720273	6.25454	1.83e-208	30.7892	0.145754	4.71e-207
426	notch3	9	1	0.533348	6.186	0	45.8301	0.217177	0
427	olfm2a	1	1	2.07729	4.09538	2.82e-57	15.9072	0.0749863	3.06e-56
428	hbaa1	3	2	1.14723	-2.17138	7.97e-200	30.1369	0.142828	1.98e-198
429	hbba1.1	3	2	1.09945	-2.20062	5.67e-160	26.9246	0.127568	1.18e-158
430	prkcab	2	2	2.65465	-1.86315	0	56.7356	0.269137	0
431	csnk1da	5	2	2.36624	-4.74793	1.41e-93	20.487	0.0969989	2.01e-92
432	socs3a	5	2	2.19405	-5.87122	3.81e-243	33.2796	0.157746	1.11e-241
433	cyth1a.1	2	2	2.59656	-2.24782	0	48.727	0.231123	0
434	sdr42e2	4	2	0.907751	-0.588562	4.71e-142	25.3481	0.120021	8.96e-141
435	pvalb8	7	2	-0.57992	-3.7059	0	58.4017	0.277047	0
436	tecpr1b	3	2	1.23598	-0.916069	0	42.5398	0.201731	0
437	nptx2a	2	2	4.0272	-3.49232	3.08e-227	32.1612	0.152115	8.42e-226
438	FP017215.1	1	1	1.4187	5.51909	2.81e-96	20.7874	0.0978915	4.12e-95
439	hlfa	5	2	1.68393	-4.77015	6.92e-125	23.7403	0.112437	1.2e-123
440	BX284638.2	11	2	-1.28976	-1.58119	4.17e-108	22.0562	0.104211	6.56e-107
441	foxj1a	5	2	1.87942	-4.99761	0	61.7483	0.29297	0
442	ier2a	8	1	-2.71552	6.43944	4.05e-217	31.4291	0.148741	1.07e-215
443	ppap2d	9	1	0.662486	6.11028	0	48.8276	0.231512	0
444	adgrl1a	4	2	1.04506	0.408262	0	50.7889	0.240902	0
445	dnajb1a	5	2	2.02597	-4.98702	7.3e-64	16.8304	0.0796053	8.43e-63
446	baiap2l1b	4	2	1.35825	-0.194443	1.85e-66	17.1806	0.081274	2.19e-65
447	cfap70	7	2	-1.93903	-3.92421	4.42e-73	18.0437	0.085325	5.51e-72
448	ubald2	5	2	2.32581	-4.94968	1.2e-71	17.8604	0.0844848	1.48e-70
449	CABZ01087224.1	2	2	2.75239	-1.92845	4.24e-109	22.1593	0.104876	6.72e-108
450	FP326649.1	1	1	1.35807	5.69436	1.15e-96	20.8302	0.098525	1.69e-95
451	mmd	2	2	2.73793	-1.92567	2.68e-55	15.6194	0.073809	2.86e-54
452	fthl30	11	2	-0.944055	-1.80586	9.89e-87	19.7044	0.0928111	1.36e-85
453	dnm2a	3	2	1.91606	-1.48506	0	45.9051	0.217761	0
454	rasd4	8	1	-2.4918	6.71783	0	49.8025	0.234849	0
455	CR392045.1	2	2	4.06064	-2.64563	2.39e-124	23.688	0.11182	4.14e-123
456	BX908797.1	9	1	-0.110831	5.77688	9.91e-58	15.9726	0.0753558	1.08e-56
457	atp5pd	6	2	-3.35375	-4.85308	2.3e-112	22.4955	0.106533	3.7e-111
458	BX537310.2	3	2	1.34651	-1.59392	2.78e-227	32.1644	0.152447	7.62e-226
459	CABZ01068050.1	4	2	0.94794	1.66024	1.61e-57	15.9425	0.0738826	1.75e-56
460	lrp8	1	1	3.16243	5.29466	9.2e-171	27.8308	0.131808	2.03e-169
461	cadpsb	2	2	2.77889	-0.861122	0	48.1874	0.228458	0
462	nr4a2b	8	1	-1.72906	6.33926	0	64.3367	0.304926	0
463	krt4	1	1	2.0991	4.28402	1.01e-195	29.8223	0.141157	2.46e-194
464	twf2a	4	2	-0.464613	-0.331942	0	37.8403	0.179346	0
465	mmp24	3	2	1.49933	-1.91598	7.87e-125	23.7349	0.112414	1.36e-123
466	lpp	1	1	1.33567	5.55921	0	44.3084	0.210032	0
467	sdc4	8	1	-2.49465	6.24405	9.73e-246	33.4583	0.158604	2.85e-244
468	srgap3	9	1	0.401354	6.39114	0	51.4256	0.243852	0
469	matn4	1	1	1.89729	6.1243	0	42.7603	0.202223	0
470	kalrnb	1	1	1.6913	5.76296	5.84e-94	20.5297	0.0970205	8.39e-93
471	serbp1a	10	3	-7.68347	-3.53499	7.75e-64	16.8269	0.0796198	8.94e-63
472	ptprnb	2	2	3.069	-2.68262	0	60.2298	0.285692	0
473	dock9b	3	2	0.384128	-1.00624	0	53.3407	0.253085	0
474	gnai2b	4	2	1.62296	-0.0454651	2.44e-220	31.6639	0.149657	6.53e-219
475	palm3	3	2	1.42805	-0.84783	6.17e-55	15.5663	0.0736322	6.56e-54
476	sgip1a	3	2	1.2337	-1.13309	0	65.322	0.310005	0
477	atp5mc3b	6	2	-4.05186	-4.52215	1.13e-138	25.0398	0.11863	2.11e-137
478	hsd17b7	7	2	-0.697559	-3.75889	0	56.4361	0.267781	0
479	si:ch211-207j7.2	5	2	2.57427	-4.78081	4.02e-81	19.0395	0.0900398	5.31e-80
480	pde4ba	3	2	-0.216771	-1.21317	3.24e-113	22.5822	0.106966	5.24e-112
481	rps10	10	3	-7.92762	-4.03716	1.95e-295	36.717	0.174106	7.07e-294
482	gpx1b	7	2	-1.2996	-4.41161	0	69.891	0.331706	0
483	ccdc40	3	2	-0.455099	-1.97995	3.02e-107	21.9664	0.103993	4.73e-106
484	cyp27c1	8	1	-2.07571	7.31614	3.88e-125	23.7646	0.112361	6.77e-124
485	tead3b	1	1	1.74463	5.42382	1.66e-108	22.0977	0.104378	2.62e-107
486	stk25a	11	2	-1.75987	-1.64932	2.73e-130	24.2579	0.11456	4.88e-129
487	cycsb	6	2	-3.56061	-4.75827	2.72e-97	20.8992	0.0989397	4.02e-96
488	pkp1b	9	1	-1.06328	7.05157	1.4e-57	15.9511	0.0753426	1.52e-56
489	glulb	8	1	-2.60211	6.62991	3.36e-61	16.4634	0.077851	3.78e-60
490	dnajc6	3	2	2.01376	-2.36496	0	49.5675	0.235134	0
491	gfi1ab	7	2	-2.03868	-3.88364	8.28e-67	17.2273	0.0814563	9.81e-66
492	inpp4ab	2	2	3.38588	-1.68508	9.96e-258	34.2729	0.16239	3.07e-256
493	mast2	2	2	2.18793	-1.03825	1.09e-78	18.7436	0.0887262	1.42e-77
494	tuba8l4	6	2	-2.30927	-4.9	2.77e-104	21.6543	0.102557	4.25e-103
495	ptprfa	1	1	0.867026	5.25501	3.69e-147	25.8071	0.122244	7.24e-146
496	ip6k2a	7	2	-1.11128	-3.40244	4.34e-231	32.4354	0.153754	1.21e-229
497	bin1b	3	2	-0.0439822	-0.889501	6.78e-81	19.0121	0.0899245	8.94e-80
498	eya2	1	1	1.78854	4.61665	7.93e-197	29.9072	0.141634	1.95e-195
499	cdk15	4	2	0.874125	1.58603	4.34e-114	22.6709	0.105715	7.05e-113
500	rpl5b	10	3	-8.04908	-3.15928	7.63e-243	33.2587	0.157638	2.21e-241
501	atp1b1a	8	1	-2.54214	6.60145	7.07e-174	28.087	0.13309	1.59e-172
502	jak1	5	2	2.57735	-5.27832	2.99e-65	17.0186	0.0805327	3.5e-64
503	sema3fa	9	1	-0.767177	7.55047	9.44e-205	30.5105	0.144397	2.41e-203
504	itpr1a	2	2	3.59213	-3.134	2.14e-196	29.8741	0.141489	5.25e-195
505	kif1aa	3	2	1.14604	-2.92516	0	98.4435	0.467325	0
506	cbfa2t2	1	1	2.24222	5.17483	2.46e-94	20.5717	0.0970983	3.54e-93
507	nck2b	1	1	1.35148	4.76192	1.04e-60	16.3949	0.0775174	1.16e-59
508	tox2	1	1	1.78983	4.09122	7.93e-189	29.2855	0.138792	1.89e-187
509	tgfbr3	1	1	2.00009	6.10916	1.7e-128	24.0873	0.113916	3.01e-127
510	dytn	11	2	-1.1009	-1.67191	1.22e-147	25.8498	0.122391	2.41e-146
511	her6	8	1	-2.43714	6.34301	0	46.3873	0.219801	0
512	raver2	2	2	2.12354	-1.21196	1.1e-55	15.6764	0.0741504	1.17e-54
513	espnla	11	2	-1.24373	-1.59184	0	93.8018	0.445144	0
514	klhl30	11	2	-1.25471	-1.64046	0	81.6243	0.38728	0
515	crocc2	11	2	-1.32408	-1.37957	0	45.8154	0.216936	0
516	ddit3	8	1	-2.65842	6.35798	1.62e-90	20.1407	0.0952653	2.28e-89
517	uqcrh	6	2	-3.54604	-4.84605	1.04e-59	16.2544	0.0768809	1.15e-58
518	iqca1	3	2	0.737345	-2.58237	0	45.8988	0.217365	0
519	ackr3b	8	1	-2.40346	6.48824	9.52e-78	18.628	0.0878662	1.23e-76
520	pjvk	11	2	-0.788266	-1.68862	6.81e-67	17.2386	0.0814835	8.07e-66
521	cacna1ib	3	2	0.597201	-2.28225	1.42e-66	17.196	0.0764144	1.68e-65
522	ror1	1	1	0.713013	5.63223	7.92e-252	33.8745	0.160475	2.39e-250
523	ryk	1	1	1.19645	5.60361	1.17e-118	23.1294	0.109451	1.95e-117
524	eef1b2	10	3	-8.0681	-3.44392	1.13e-206	30.655	0.145302	2.89e-205
525	itm2ba	7	2	-0.0395381	-4.31401	5.83e-120	23.2585	0.11018	9.79e-119
526	ttll3	5	2	1.92972	-4.87028	1.26e-78	18.7358	0.0885365	1.64e-77
527	pdzrn3b	1	1	1.05496	5.9195	8.57e-54	15.397	0.0727111	9.02e-53
528	agap1	1	1	1.41704	3.88788	1.43e-60	16.3756	0.0774826	1.6e-59
529	chl1b	9	1	0.261358	6.42809	0	46.2994	0.219376	0
530	BX942846.1	2	2	4.39343	-2.67258	0	77.55	0.367706	0
531	slc4a8	2	2	3.88073	-2.32307	0	73.2313	0.347331	0
532	tmeff2b	2	2	3.42764	-2.83215	0	38.6618	0.183309	0
533	cavin2b	1	1	2.01245	5.63726	1.11e-150	26.1189	0.12336	2.23e-149
534	pex5la	2	2	3.31297	-2.42137	0	121.01	0.574532	0
535	rhbdl3	1	1	1.75118	4.83738	1.92e-66	17.1786	0.0808542	2.27e-65
536	slc16a1a	9	1	-0.933625	7.0384	1.01e-286	36.1668	0.171036	3.53e-285
537	negr1	1	1	1.66339	5.48357	1.56e-270	35.1219	0.166347	5.15e-269
538	epha2a	1	1	0.915502	5.64326	1.12e-197	29.9725	0.141784	2.77e-196
539	rpsa	10	3	-7.86292	-3.57543	0	38.1844	0.181076	0
540	baz2ba	1	1	1.69447	4.829	2.03e-71	17.8311	0.0843906	2.5e-70
541	xirp2a	4	2	-0.229288	0.194393	0	56.1773	0.266439	0
542	nbeal1	3	2	1.8719	-1.62664	6.6e-73	18.0215	0.0852736	8.22e-72
543	ca16b	1	1	2.30025	5.79549	2.09e-71	17.8293	0.083927	2.58e-70
544	ptmaa	10	3	-7.77426	-3.08246	8.47e-96	20.7345	0.0981551	1.23e-94
545	kcnh7	4	2	-0.0851522	0.317438	0	85.199	0.403984	0
546	CU693471.1	2	2	3.3163	-2.49632	2.07e-85	19.5499	0.0923973	2.82e-84
547	dlg1	2	2	3.17312	-2.04967	0	70.5724	0.334943	0
548	dnah9l	3	2	0.156316	-1.24677	0	47.9873	0.227638	0
549	vapb	3	2	-0.37894	-3.24824	1.12e-98	21.051	0.0996771	1.66e-97
550	atp5f1e	6	2	-3.46502	-4.88504	1.96e-148	25.9205	0.122817	3.86e-147
551	cyc1	6	2	-3.1688	-4.4086	1.36e-69	17.5944	0.0832273	1.65e-68
552	magi3b	3	2	1.38905	-1.14592	0	54.1741	0.257035	0
553	rps27a	10	3	-8.1016	-3.77505	0	37.5368	0.177999	0
554	ptprt	4	2	1.0256	0.326472	2.31e-191	29.484	0.139654	5.56e-190
555	slc2a1b	5	2	2.58457	-5.39198	2.19e-163	27.2145	0.128949	4.64e-162
556	cox6c	6	2	-3.15484	-4.95796	3.95e-166	27.4453	0.130056	8.49e-165
557	pou3f3b	8	1	-2.38626	7.05372	1.94e-141	25.2924	0.119637	3.67e-140
558	cdh22	4	2	0.94853	1.5941	1.13e-67	17.3419	0.0817717	1.36e-66
559	rplp2	10	3	-7.5797	-3.77917	1.94e-147	25.8321	0.122403	3.81e-146
560	grm4	2	2	2.46914	-1.58387	0	44.6714	0.211795	0
561	si:dkey-43k4.3	7	2	-1.87824	-4.11695	6.51e-65	16.9729	0.0802348	7.61e-64
562	rps26l	10	3	-7.81779	-3.93824	2.1e-260	34.4521	0.163343	6.58e-259
563	PLXNA1	2	2	3.06821	-2.12336	4.78e-63	16.7188	0.0789839	5.48e-62
564	myl9b	8	1	-2.43775	6.29805	1.28e-127	24.0034	0.113378	2.26e-126
565	spega	2	2	2.60126	-1.01799	0	54.4017	0.257734	0
566	LO017951.1	2	2	4.30871	-2.66319	3.79e-223	31.8673	0.150448	1.02e-221
567	uqcrc1	6	2	-3.04227	-4.84815	1.77e-52	15.1998	0.0718665	1.85e-51
568	cacna2d2a	3	2	0.253574	-0.895219	0	48.552	0.230324	0
569	cntn3b	2	2	4.05523	-3.40813	0	79.0303	0.374862	0
570	pbx1b	4	2	0.0500195	0.433463	8.71e-124	23.6336	0.11167	1.5e-122
571	rbfox2	7	2	-1.98645	-3.75509	9.36e-52	15.0904	0.0713589	9.73e-51
572	erich2	7	2	-1.05049	-3.90886	1.02e-79	18.8693	0.0892722	1.34e-78
573	tanc1a	4	2	-1.10149	0.907789	3.43e-124	23.6729	0.111879	5.92e-123
574	igfbp5a	2	2	3.19231	-2.69899	1.72e-170	27.8084	0.131644	3.78e-169
575	pou4f1	7	2	-1.81354	-3.49236	0	41.1827	0.195259	0
576	cfap100	7	2	-1.93562	-4.00483	8.9e-78	18.6316	0.0881149	1.15e-76
577	zeb2b	1	1	2.82918	5.40793	1.16e-80	18.984	0.0892992	1.52e-79
578	cadm3	1	1	3.05829	5.37732	7.42e-271	35.1431	0.166047	2.46e-269
579	cdh24b	4	2	0.331393	0.37621	6.15e-91	20.1888	0.0950069	8.66e-90
580	tnr	2	2	3.29239	-1.66333	0	73.5546	0.34895	0
581	tmie	3	2	1.05465	-3.03876	2.17e-242	33.2273	0.157491	6.29e-241
582	fam102ba	2	2	3.23424	-2.72461	0	44.2671	0.209826	0
583	zgc:154006	3	2	0.674715	-2.94894	3.99e-110	22.2655	0.105412	6.35e-109
584	efna2a	1	1	1.34021	5.38727	0	38.7238	0.18348	0
585	rem2	4	2	0.912591	1.54953	3.35e-142	25.3616	0.119679	6.38e-141
586	wls	8	1	-2.03356	7.03085	3.94e-93	20.4368	0.0964746	5.63e-92
587	tnn	8	1	-1.9659	6.81444	0	51.3809	0.242869	0
588	kcnn1a	11	2	-0.709568	-1.66292	1.09e-100	21.2694	0.100624	1.64e-99
589	cables1	4	2	-0.0767364	0.265124	0	50.1024	0.237424	0
590	jund	5	2	2.1637	-5.51436	1.37e-187	29.1881	0.138336	3.26e-186
591	tnk2b	4	2	1.0416	1.79274	1.08e-208	30.8062	0.145296	2.8e-207
592	uba52	10	3	-7.78539	-4.12022	5.14e-303	37.189	0.176355	1.92e-301
593	amph	3	2	1.10358	-2.90093	0	38.4605	0.182373	0
594	dpp6b	4	2	1.17355	0.186996	0	70.9365	0.336569	0
595	rps28	10	3	-7.73876	-3.56445	3.41e-242	33.2137	0.157458	9.86e-241
596	prdx1	6	2	-4.26475	-3.89696	2.62e-127	23.9736	0.113208	4.61e-126
597	pip5k1cb	3	2	1.13078	-2.6593	3.52e-198	30.0111	0.142234	8.72e-197
598	col11a1b	1	1	2.09182	6.37234	4.61e-165	27.3558	0.129138	9.85e-164
599	angptl4	8	1	-2.60377	6.44304	1.23e-252	33.9293	0.160684	3.75e-251
600	clstn2	2	2	2.95775	-0.402419	1.91e-175	28.2151	0.133593	4.32e-174
601	rpl5a	10	3	-7.85939	-3.25981	5.19e-204	30.4547	0.144327	1.32e-202
602	dlg1l	2	2	2.41795	-0.361945	1.31e-96	20.8242	0.0986156	1.92e-95
603	spsb4a	3	2	0.273413	-0.86732	0	45.9036	0.217754	0
604	ak5	8	1	-0.815835	7.61187	5.93e-112	22.4534	0.105894	9.52e-111
605	eef2b	10	3	-7.79014	-3.43303	9.62e-146	25.6806	0.121679	1.87e-144
606	cnn2	8	1	-2.39995	6.35696	3.04e-134	24.6296	0.116178	5.52e-133
607	rnf220a	1	1	1.75155	4.92275	5.16e-81	19.0263	0.0897875	6.82e-80
608	myo10	1	1	1.38162	4.45234	5e-102	21.4135	0.10135	7.59e-101
609	gfi1aa	3	2	1.02883	-2.90894	0	71.1541	0.337702	0
610	mycb	8	1	-2.82075	6.16402	7.42e-105	21.7149	0.102791	1.14e-103
611	epha4a	9	1	0.668442	6.04652	1.09e-65	17.0774	0.0806546	1.29e-64
612	gadd45bb	8	1	-2.05515	6.31085	1.56e-78	18.7246	0.0883089	2.03e-77
613	st6galnac3	4	2	1.17902	-0.218089	4.69e-173	28.0196	0.132657	1.05e-171
614	lamc1	1	1	1.58642	5.50192	8.47e-72	17.8798	0.0843599	1.05e-70
615	mylk4a	11	2	-0.832295	-1.77374	6.56e-81	19.0137	0.0898681	8.66e-80
616	otol1a	8	1	-2.05863	6.88284	1.39e-144	25.5765	0.120059	2.69e-143
617	rps8a	10	3	-7.95562	-3.84059	2.02e-281	35.8281	0.169882	6.96e-280
618	cntnap2b	3	2	1.31167	-0.597775	3.4e-56	15.7506	0.0744231	3.65e-55
619	adcy8	2	2	3.40564	-1.73635	0	44.2078	0.209517	0
620	ptprfb	1	1	0.825113	5.27696	0	43.7534	0.207532	0
621	hs6st1a	1	1	1.35896	3.81278	1.78e-255	34.1214	0.161752	5.45e-254
622	cahz	8	1	-1.45747	7.74372	1.18e-245	33.4525	0.158044	3.46e-244
623	vav3b	4	2	0.400176	0.447714	2.94e-56	15.7597	0.0744165	3.17e-55
624	pde4ca	4	2	0.00189504	0.412249	4.04e-140	25.1722	0.11894	7.61e-139
625	ndc1	4	2	-1.22342	0.893198	2.47e-78	18.7001	0.0882488	3.21e-77
626	dlgap1a	3	2	1.25565	-0.862658	4.91e-100	21.1987	0.100368	7.34e-99
627	zgc:113691	4	2	-1.22659	0.909927	1.55e-205	30.5697	0.143238	3.95e-204
628	b4galt2	2	2	2.26456	-1.55881	0	57.0039	0.270482	0
629	oc90	9	1	-0.626758	7.2482	2.63e-151	26.1739	0.123519	5.29e-150
630	col15a1b	1	1	0.84205	5.98134	5.24e-69	17.5178	0.0827008	6.34e-68
631	eef1da	10	3	-7.84947	-3.00437	1.33e-130	24.2875	0.114968	2.38e-129
632	cfap57	3	2	0.190859	-1.18967	0	38.9293	0.184607	0
633	pbx1a	3	2	0.461708	-1.10502	1.08e-175	28.2354	0.133818	2.43e-174
634	cdcp2	3	2	1.11249	-2.94684	6.08e-63	16.7045	0.0789848	6.96e-62
635	arhgef4	9	1	0.35692	6.21229	8.45e-53	15.2483	0.0720704	8.85e-52
636	glula	8	1	-1.77125	7.30538	0	79.87	0.378924	0
637	gpt2l	9	1	-1.00861	7.10646	1.26e-115	22.8262	0.107615	2.06e-114
638	SSBP4	3	2	1.27935	-2.21536	0	41.4998	0.196806	0
639	kncn	7	2	-1.6252	-4.09336	0	42.3634	0.200798	0
640	lpin2	7	2	-0.138989	-3.88644	6.75e-266	34.8169	0.165016	2.18e-264
641	pfkpb	5	2	1.87251	-3.34588	2.77e-105	21.7601	0.103035	4.29e-104
642	odf3l2a	4	2	-1.07334	-0.161314	0	52.4331	0.248246	0
643	slc4a2a	8	1	-0.879337	7.75689	0	43.6257	0.20668	0
644	pard3ab	2	2	2.17905	-0.597413	1.2e-98	21.0478	0.0996787	1.78e-97
645	espnlb	11	2	-1.30066	-1.49375	0	63.9214	0.303011	0
646	adcyap1b	7	2	0.15678	-3.89754	0	42.3622	0.199872	0
647	rab6bb	7	2	-0.270501	-4.01375	2.39e-60	16.3443	0.0772246	2.66e-59
648	camk2n1a	7	2	-2.63847	-3.99081	1.3e-149	26.0247	0.12325	2.59e-148
649	pde4bb	2	2	2.06476	-0.868773	3.7e-55	15.5989	0.0737579	3.95e-54
650	egfra	9	1	0.142212	5.96028	1.81e-194	29.7253	0.140692	4.41e-193
651	cryz	3	2	-0.154423	-2.24926	6.69e-94	20.5231	0.0971289	9.61e-93
652	lrrc53	3	2	-0.204609	-1.87375	3.07e-181	28.6835	0.135895	7.15e-180
653	itm2cb	7	2	-0.175438	-3.65511	6.31e-273	35.2783	0.167226	2.1e-271
654	hes6	6	2	-4.90523	-4.02823	2.9e-64	16.885	0.0797713	3.37e-63
655	fndc3ba	1	1	1.15148	5.20623	0	50.9437	0.241661	0
656	per2	5	2	2.47178	-5.40657	2.2e-124	23.6916	0.112173	3.81e-123
657	cacnb2b	2	2	4.20623	-3.41614	1.99e-214	31.2315	0.147362	5.22e-213
658	si:ch211-38m6.6	3	2	0.98623	-3.27609	0	65.9857	0.313146	0
659	rpl7	10	3	-8.19551	-3.47341	0	38.1807	0.181051	0
660	f3b	9	1	-1.48165	6.36881	9.87e-265	34.7398	0.16417	3.16e-263
661	ephb3a	1	1	2.6064	5.34746	7.02e-54	15.4099	0.0725133	7.4e-53
662	si:ch211-66k16.28	3	2	1.63502	-1.92383	0	41.5037	0.196828	0
663	fndc7a	3	2	0.296284	-0.918956	3.56e-133	24.5298	0.116023	6.44e-132
664	tnika	1	1	1.53932	5.40533	9.83e-65	16.9488	0.0800493	1.15e-63
665	chd7	11	2	-1.2658	-1.14727	5.13e-58	16.0137	0.075758	5.61e-57
666	pls1	3	2	1.28669	-0.966753	0	40.4679	0.191869	0
667	higd1a	5	2	1.99529	-5.92151	9.49e-52	15.0895	0.0713643	9.86e-51
668	astn1	2	2	2.73299	-1.58739	6.33e-183	28.8183	0.136525	1.48e-181
669	rab2a	7	2	-2.04168	-3.839	2.61e-218	31.5162	0.149399	6.91e-217
670	dpydb	2	2	4.05745	-2.56944	0	40.5354	0.192031	0
671	tox	1	1	1.74074	4.59418	7.03e-164	27.2561	0.129148	1.49e-162
672	abhd3	4	2	-0.264015	0.321072	4.21e-81	19.037	0.0900292	5.56e-80
673	fam110b	2	2	2.72768	-1.57639	0	40.6075	0.192556	0
674	ano8a	2	2	2.63467	-2.82484	3.55e-273	35.2946	0.167292	1.18e-271
675	ndufv2	6	2	-2.91121	-4.62642	2.57e-52	15.1754	0.0717293	2.69e-51
676	ptmab	6	2	-4.95055	-4.00324	1.12e-150	26.1187	0.12375	2.24e-149
677	efr3a	2	2	2.34587	-1.34638	4.19e-221	31.7194	0.150332	1.13e-219
678	zgc:56628	3	2	1.11561	-2.44403	0	96.9502	0.459764	0
679	FQ377603.1	1	1	1.47702	4.54516	4.63e-57	15.8762	0.0750168	5.01e-56
680	ptprsa	1	1	2.02536	4.39729	5.13e-162	27.0985	0.128297	1.08e-160
681	cib3	5	2	2.40205	-3.30703	0	61.5897	0.292119	0
682	cirbpa	6	2	-3.90671	-4.09388	1.27e-52	15.2216	0.0719965	1.33e-51
683	plpp2a	1	1	1.63222	5.89783	2.49e-64	16.8941	0.079779	2.89e-63
684	epha4b	1	1	0.836742	4.83679	2.25e-118	23.1013	0.109355	3.73e-117
685	otomp	2	2	3.11635	-2.71654	0	55.3108	0.262366	0
686	gpc5c	8	1	-0.949989	7.96322	2.93e-77	18.5678	0.0871055	3.77e-76
687	capsla	6	2	-3.9287	-3.97674	3e-72	17.9376	0.0847372	3.72e-71
688	CCDC39	3	2	0.129142	-1.75967	1.44e-74	18.2318	0.0862229	1.82e-73
689	cpe	7	2	0.333745	-3.91421	9.19e-70	17.6166	0.0833346	1.12e-68
690	gab1	1	1	1.22211	4.88365	2.37e-69	17.5629	0.0831101	2.87e-68
691	tmprss3b	5	2	2.6467	-3.34354	2.85e-75	18.3203	0.0865311	3.61e-74
692	atp1a1a.1	9	1	-1.36684	6.70294	1.04e-56	15.8252	0.074806	1.13e-55
693	si:ch211-145b13.5	6	2	-3.44551	-3.03226	2.94e-66	17.1538	0.0775418	3.47e-65
694	march4l	3	2	1.43184	-1.48314	1.15e-183	28.8774	0.136804	2.69e-182
695	maml3	1	1	1.48476	3.96561	7.54e-89	19.9497	0.0944512	1.05e-87
696	prom1b	8	1	-1.00738	7.92989	1.76e-249	33.7147	0.159016	5.27e-248
697	slit2	2	2	3.20026	-1.44478	0	53.5342	0.253946	0
698	mast1a	2	2	4.00169	-2.31065	2.21e-168	27.6334	0.130538	4.8e-167
699	rpl24	10	3	-8.03457	-3.24085	0	39.0206	0.185037	0
700	triobpa	4	2	-0.624246	-0.543199	0	44.3584	0.210335	0
701	smdt1b	6	2	-2.79493	-4.30019	2.77e-73	18.0694	0.085399	3.46e-72
702	dla	6	2	-4.69264	-3.64928	0	53.2061	0.251937	0
703	ndufb6	6	2	-2.92751	-4.86343	1.31e-61	16.5203	0.0781293	1.48e-60
704	pros1	2	2	4.13696	-3.20639	0	45.4376	0.215287	0
705	lrba	2	2	2.11492	-0.472453	0	52.0411	0.24689	0
706	asb5b	3	2	0.668381	-3.47372	7.99e-58	15.9861	0.0755615	8.71e-57
707	kitb	11	2	-0.899623	-1.6361	3.53e-233	32.5834	0.154403	9.87e-232
708	rps3a	10	3	-8.07054	-3.63551	0	40.6987	0.193014	0
709	mhc1zba	7	2	0.268457	-4.19771	1.1e-83	19.3462	0.0915819	1.48e-82
710	lef1	1	1	2.38627	5.72878	3.6e-126	23.8642	0.112427	6.31e-125
711	dnajb1b	5	2	2.00309	-5.3304	0	57.4765	0.272729	0
712	meis1a	4	2	-1.21137	0.89345	1.21e-74	18.2415	0.0862045	1.52e-73
713	elfn1b	2	2	4.37983	-2.86273	3.82e-194	29.7002	0.140167	9.29e-193
714	cxxc4	2	2	2.28717	-1.84807	8.3e-254	34.0086	0.161091	2.53e-252
715	adgrl3.1	4	2	1.57746	0.997093	1.92e-87	19.7871	0.0936591	2.66e-86
716	pard3ba	1	1	1.73833	4.83681	1.83e-76	18.4692	0.087066	2.34e-75
717	myo15ab	4	2	-0.849218	0.654915	4.8e-257	34.227	0.162134	1.48e-255
718	si:dkey-92j12.5	3	2	1.55757	-2.65918	2.07e-307	37.4599	0.177608	7.86e-306
719	inpp4b	4	2	-0.0209282	0.45113	1.77e-96	20.8096	0.0981316	2.59e-95
720	clta	7	2	-1.35429	-4.34909	0	46.0135	0.218274	0
721	rpl9	10	3	-7.89748	-3.07967	4.98e-305	37.3134	0.176886	1.88e-303
722	tenm3	1	1	1.89614	5.66942	7.69e-227	32.1328	0.152307	2.1e-225
723	rgs12b	3	2	0.234948	-2.0993	1.23e-236	32.8267	0.155615	3.47e-235
724	dachc	5	2	2.28118	-3.12636	0	53.4765	0.253709	0
725	fam160a1a	2	2	2.25764	-1.79106	0	39.809	0.188782	0
726	ndufb7	6	2	-2.74147	-4.89761	2.82e-88	19.8836	0.0941225	3.92e-87
727	neurl1aa	3	2	-0.293131	-1.27767	2.54e-104	21.6582	0.102521	3.91e-103
728	cfap58	3	2	0.209881	-1.25738	2.15e-86	19.665	0.093081	2.95e-85
729	npnta	2	2	3.73165	-2.97852	7.55e-110	22.2369	0.105148	1.2e-108
730	fbxw7	1	1	1.3085	4.04162	7.58e-104	21.6079	0.102337	1.16e-102
731	sdk1b	1	1	1.61448	3.82869	5.79e-150	26.0557	0.123337	1.15e-148
732	mtnr1aa	8	1	-0.939924	7.95899	0	41.9771	0.197249	0
733	prdx2	6	2	-3.32764	-4.78225	5.73e-203	30.3758	0.14398	1.45e-201
734	atp11a	2	2	2.16264	-0.256343	1.12e-117	23.0319	0.109102	1.85e-116
735	actb1	10	3	-7.73318	-3.18649	6.4e-157	26.6626	0.126337	1.31e-155
736	junba	8	1	-2.64529	6.44037	0	52.0285	0.246681	0
737	rps6	10	3	-8.18942	-3.23079	3.45e-269	35.0337	0.166092	1.12e-267
738	klf7a	1	1	1.2271	5.37547	1.66e-83	19.3249	0.091294	2.23e-82
739	nfixa	3	2	0.0989135	-2.1241	2.98e-153	26.3443	0.124831	6.05e-152
740	atp5md	6	2	-3.07749	-4.90643	3.47e-142	25.3602	0.120142	6.62e-141
741	jam2a	6	2	-4.56018	-3.85078	2.39e-142	25.3748	0.119607	4.57e-141
742	golga7ba	7	2	-0.231746	-3.99268	2.2e-74	18.2086	0.0860912	2.77e-73
743	si:dkey-26i13.8	5	2	2.35994	-2.84475	0	63.4045	0.300833	0
744	mcf2la	3	2	1.45994	-1.15614	6.9e-127	23.9333	0.113362	1.21e-125
745	tusc3	3	2	1.62329	-1.93861	8.88e-69	17.4878	0.082754	1.07e-67
746	lmo7b	3	2	-0.297263	-2.92907	0	39.4342	0.186978	0
747	2022-03-01	3	2	1.76674	-1.54972	8.06e-83	19.2431	0.0910382	1.08e-81
748	atp5pf	6	2	-3.35658	-4.93157	9.26e-106	21.8103	0.103284	1.44e-104
749	micu3a	2	2	3.95997	-3.51161	0	77.3123	0.366899	0
750	ERBB4	2	2	2.23536	-0.984182	2.44e-60	16.3429	0.0770125	2.72e-59
751	fhdc1	4	2	0.127158	0.14083	0	38.524	0.182543	0
752	appa	5	2	2.02926	-3.66611	1.44e-138	25.0299	0.118594	2.69e-137
753	rtn4rl2a	7	2	-2.13077	-2.89356	5.56e-74	18.1579	0.0849483	6.96e-73
754	arfip1	3	2	1.5831	-2.42503	3.37e-260	34.4383	0.163284	1.06e-258
755	sh3gl2a	7	2	-0.427053	-3.65407	4.33e-73	18.0448	0.0853308	5.4e-72
756	ndufab1a	6	2	-3.1748	-4.66289	4.11e-65	17	0.0803904	4.81e-64
757	eef1a1l2	7	2	-0.74766	-3.8288	1.54e-223	31.8955	0.151168	4.17e-222
758	atp1a1a.4	9	1	-1.01558	7.17364	0	45.2558	0.214461	0
759	GALNTL6	1	1	3.42212	5.11813	5.3e-116	22.864	0.107737	8.66e-115
760	hmgb2a	6	2	-4.14542	-4.24702	6.83e-55	15.5597	0.0735864	7.26e-54
761	tpt1	10	3	-8.12081	-3.30666	3.53e-171	27.8651	0.13205	7.82e-170
762	bnc2	1	1	1.93904	6.24538	7.18e-142	25.3315	0.119644	1.36e-140
763	akt3b	5	2	2.59965	-5.19688	1.05e-100	21.2713	0.100606	1.57e-99
764	eif3f	10	3	-7.9604	-3.25236	2.19e-80	18.9505	0.0896812	2.87e-79
765	mdh1aa	7	2	-1.3748	-4.42066	6.28e-200	30.1448	0.142881	1.57e-198
766	mb	8	1	-1.95475	7.24215	0	68.8395	0.32665	0
767	ctnna2	1	1	3.1136	5.32826	0	43.6523	0.206952	0
768	ndst3	4	2	-1.07278	0.805692	0	84.9367	0.402634	0
769	dnah6	3	2	0.934657	-1.19663	7.83e-173	28.0013	0.132694	1.75e-171
770	limch1a	3	2	1.32734	-0.689363	2.71e-231	32.4499	0.153815	7.55e-230
771	ugt8	4	2	0.330003	-0.276412	4.03e-89	19.981	0.0946047	5.64e-88
772	chrna9	4	2	-1.01313	-0.08865	1.26e-264	34.7328	0.164514	4.03e-263
773	fam184b	3	2	-0.274533	-2.77084	1.1e-74	18.2469	0.0862633	1.38e-73
774	dachb	5	2	2.20768	-3.14228	0	57.7189	0.273871	0
775	fat1a	1	1	1.20124	5.62833	0	54.8798	0.260192	0
776	spock3	2	2	3.2046	-2.68944	0	52.4543	0.248832	0
777	si:ch73-380n15.2	4	2	1.27625	0.53799	3.52e-175	28.1934	0.133073	7.96e-174
778	ptprdb	11	2	-1.32571	-1.40558	4.98e-71	17.7808	0.0839218	6.11e-70
779	srd5a2a	3	2	0.262123	-2.96856	1.25e-56	15.8137	0.0746665	1.35e-55
780	pcdh7a	4	2	-0.229271	-0.499105	0	74.4689	0.353356	0
781	rims1b	1	1	2.69917	5.66005	3.04e-56	15.7576	0.0735853	3.27e-55
782	gpc6a	4	2	1.2977	0.95614	5.69e-137	24.8829	0.117645	1.05e-135
783	glra3	2	2	4.2061	-2.62268	0	76.104	0.360872	0
784	AL929216.1	2	2	2.57938	-1.22526	0	61.5392	0.291731	0
785	tbc1d4	2	2	2.86795	-1.86812	5.35e-138	24.9776	0.118297	9.93e-137
786	si:dkey-91i10.2	3	2	0.79394	-0.817542	7.4e-119	23.1492	0.109613	1.24e-117
787	ttn.2	1	1	2.21232	4.15603	6.19e-274	35.3441	0.16734	2.07e-272
788	dachd	2	2	2.88586	-0.819848	5.53e-263	34.6239	0.164158	1.76e-261
789	mcf2lb	9	1	0.252475	6.48959	9.7e-68	17.3509	0.0818369	1.16e-66
790	clasp1a	2	2	2.21167	-1.64438	1.85e-87	19.7891	0.0936792	2.56e-86
791	osbpl6	3	2	0.781269	-0.948061	7.35e-62	16.5551	0.0782912	8.32e-61
792	fmnl2a	1	1	0.793335	5.7373	5.98e-55	15.5682	0.073484	6.37e-54
793	cox17	6	2	-3.16503	-4.26136	7.77e-132	24.4039	0.115577	1.4e-130
794	atp5po	6	2	-2.65591	-4.87086	1.09e-167	27.5757	0.130668	2.35e-166
795	hcn5	3	2	0.486478	-1.83252	0	74.1368	0.351767	0
796	lrp2a	2	2	4.28822	-3.1769	0	111.628	0.529848	0
797	BX649442.2	3	2	0.742794	-3.49007	4.64e-109	22.1553	0.104883	7.34e-108
798	znf385b	4	2	-0.971274	0.802194	0	71.2373	0.337739	0
799	si:ch211-168k14.2	8	1	-0.987267	7.94613	3.26e-61	16.4653	0.0774073	3.67e-60
800	stat1b	11	2	-1.40195	-1.55802	9.57e-98	20.949	0.0982873	1.41e-96
801	pard3bb	1	1	1.25416	5.48538	0	67.6376	0.320878	0
802	kcnh3	5	2	2.32691	-3.12171	0	47.2222	0.223955	0
803	nfe2l2a	8	1	-1.38902	7.77461	9.72e-55	15.5371	0.0732756	1.03e-53
804	sap18	6	2	-4.29322	-4.21596	3.03e-52	15.1646	0.0716516	3.16e-51
805	CU469539.1	2	2	3.37733	-2.35435	0	47.6217	0.225785	0
806	klf7b	1	1	1.20817	5.35409	1.09e-82	19.2273	0.0909439	1.46e-81
807	irs2b	5	2	1.82027	-4.84176	4.28e-117	22.9736	0.108804	7.07e-116
808	glsb	4	2	0.654647	-0.0703334	8.39e-65	16.9581	0.0802381	9.79e-64
809	RAMP1	2	2	2.44769	-1.96558	0	45.6473	0.216487	0
810	xirp2b	3	2	1.84231	-1.99042	0	52.7256	0.250126	0
811	tfg	7	2	-2.07177	-4.23094	1.54e-101	21.3612	0.101143	2.32e-100
812	pde9a	2	2	3.51963	-3.50273	1.26e-244	33.3817	0.158134	3.69e-243
813	pde1a	2	2	2.65647	-1.64333	0	64.9935	0.308336	0
814	dusp19a	3	2	0.428358	-3.79425	4.39e-68	17.3965	0.0822469	5.27e-67
815	atp5mc3a	6	2	-3.52914	-4.37777	1.16e-60	16.3882	0.0775032	1.3e-59
816	pou3f3a	8	1	-2.00512	6.86337	3.35e-58	16.0402	0.0752378	3.67e-57
817	rpl8	10	3	-8.09866	-3.28205	2.84e-249	33.7005	0.159769	8.49e-248
818	jam2b	8	1	-1.80417	7.14361	1.66e-249	33.7164	0.159028	4.98e-248
819	cx30.3	9	1	-1.10848	6.97517	0	64.2472	0.304216	0
820	myo1b	1	1	1.65131	5.35438	5.35e-175	28.1786	0.133259	1.21e-173
821	caska	9	1	0.374488	6.04619	7.54e-59	16.1325	0.0763253	8.29e-58
822	ncam2	4	2	0.999415	1.83534	0	63.0492	0.299061	0
823	tmprss3a	3	2	1.12401	-2.90059	0	43.6329	0.206944	0
824	hs6st3b	4	2	0.360589	0.352553	1.04e-278	35.6534	0.168292	3.55e-277
825	sik1	5	2	2.17921	-5.84231	3.4e-71	17.8022	0.0842453	4.18e-70
826	col18a1a	1	1	1.94571	3.47445	0	46.7388	0.221716	0
827	adarb1b	4	2	1.53258	0.496643	1.08e-172	27.9898	0.132642	2.41e-171
828	arhgef7a	3	2	0.44336	-1.54366	5.1e-62	16.5771	0.0783629	5.79e-61
829	arglu1a	7	2	-1.56515	-3.50463	7.69e-63	16.6905	0.0789713	8.79e-62
830	pcbp3	1	1	2.13239	3.15786	4.4e-153	26.3296	0.124651	8.92e-152
831	atp1a1b	2	2	4.21526	-3.44487	0	95.7773	0.454503	0
832	sox1a	5	2	1.83656	-3.72911	0	41.5792	0.197127	0
833	coq10b	5	2	1.77533	-5.3772	1.17e-52	15.2268	0.0720004	1.23e-51
834	map2	1	1	1.36482	4.58176	5.38e-75	18.2856	0.0864498	6.8e-74
835	hdac4	1	1	1.36567	3.86668	4.78e-96	20.7619	0.0983151	6.98e-95
836	calcrla	3	2	1.93667	-2.1696	2.28e-240	33.0871	0.156824	6.53e-239
837	igsf3	1	1	1.94032	4.90764	0	46.8823	0.222146	0
838	gpr156	11	2	-1.06313	-1.61219	0	53.97	0.256003	0
839	dnajb2	5	2	1.93677	-4.93449	8.56e-142	25.3246	0.119948	1.63e-140
840	lrp1bb	3	2	1.14117	-1.07332	0	44.4019	0.210502	0
841	stxbp5l	2	2	2.28276	-0.926264	4.04e-249	33.6901	0.159667	1.2e-247
842	MAP3K13	4	2	1.03409	-0.0342449	5.46e-127	23.9431	0.113388	9.6e-126
843	plcl1	1	1	1.85346	3.81594	1.67e-56	15.7956	0.0746073	1.8e-55
844	fstl1b	2	2	3.25446	-1.2587	2.42e-201	30.2525	0.14335	6.06e-200
845	dgkh	4	2	0.531128	0.641585	3.99e-64	16.8661	0.0796973	4.63e-63
846	cnmd	8	1	-1.60183	7.1619	7.31e-58	15.9916	0.0753975	7.97e-57
847	igfbp5b	3	2	-0.164128	-3.18554	0	58.1797	0.276051	0
848	tns1b	1	1	0.607347	5.64549	0	50.4136	0.239042	0
849	lmo7a	8	1	-1.2699	7.58697	1.63e-84	19.4442	0.091951	2.22e-83
850	gpbar1	2	2	3.29161	-3.07428	6.31e-168	27.5955	0.130573	1.37e-166
851	ikzf2	4	2	0.951985	-0.059876	3.44e-105	21.7502	0.102844	5.32e-104
852	ttn.1	1	1	2.21443	4.09127	1.52e-279	35.7073	0.169061	5.21e-278
853	dbi	6	2	-3.64807	-4.40833	4.31e-74	18.1719	0.0859691	5.4e-73
854	enox1	2	2	4.43169	-2.65271	0	50.4112	0.238902	0
855	myo16	3	2	0.489647	-0.824838	1.21e-75	18.3668	0.0869042	1.54e-74
856	arl5a	7	2	-0.543197	-3.80423	8.98e-75	18.2577	0.0863762	1.13e-73
857	inhbb	5	2	2.57109	-3.62764	0	76.6967	0.363951	0
858	gli2a	1	1	1.44904	5.51961	0	37.7811	0.178879	0
859	gpm6bb	1	1	1.97524	5.5558	5.09e-97	20.8693	0.0985906	7.51e-96
860	myo3b	3	2	1.88475	-2.04059	0	99.283	0.47134	0
861	sema5ba	4	2	1.21092	0.478414	0	66.4187	0.315123	0
862	myo10l3	5	2	2.37024	-3.13787	0	45.0464	0.21367	0
863	nrp2b	4	2	1.14336	2.11875	1.14e-158	26.8131	0.126947	2.35e-157
864	cxcr4b	5	2	2.6138	-3.49366	1.14e-91	20.2717	0.0955594	1.62e-90
865	adcy5	1	1	1.13798	5.51521	1.06e-63	16.8083	0.0792586	1.22e-62
866	znf804a	2	2	2.20708	-1.67891	1.87e-171	27.8879	0.132101	4.14e-170
867	fam117bb	1	1	1.42919	5.55696	2.9e-128	24.0651	0.113817	5.14e-127
868	RAPH1	11	2	-1.30472	-1.5676	0	56.5552	0.267968	0
869	ndufb3	6	2	-3.11721	-4.55908	2.67e-118	23.0939	0.109358	4.43e-117
870	tmbim1b	3	2	-0.284382	-3.52893	0	53.4843	0.253723	0
871	fign	1	1	1.62816	4.17931	6.38e-128	24.0324	0.113805	1.13e-126
872	rpl31	10	3	-7.7357	-4.12978	5.73e-299	36.9378	0.175159	2.1e-297
873	tlr7.1	4	2	0.981219	-0.437769	0	46.1155	0.218651	0
874	tmsb4x	8	1	-2.75464	6.51987	0	44.2957	0.210043	0
875	tanc1b	1	1	1.41959	5.55977	9.33e-122	23.4353	0.110905	1.59e-120
876	CABZ01079853.1	11	2	-0.799497	-1.7231	1.1e-265	34.8028	0.164889	3.54e-264
877	si:rp71-77l1.1	8	1	-2.18524	7.13587	1.72e-94	20.5891	0.0968003	2.48e-93
878	irx2a	7	2	-0.267189	-4.01403	2.68e-125	23.7802	0.11261	4.68e-124
879	rpl18	10	3	-8.06239	-3.36734	8.93e-263	34.61	0.164093	2.84e-261
880	mcl1b	8	1	-2.51598	6.66377	2.22e-162	27.1294	0.128457	4.68e-161
881	tuft1a	9	1	-1.59194	6.29561	2.99e-68	17.4184	0.082381	3.6e-67
882	plecb	1	1	1.86616	5.89666	8.52e-82	19.1205	0.0904118	1.13e-80
883	hpn	9	1	-0.693364	6.81786	1.64e-84	19.444	0.091951	2.22e-83
884	fxyd1	10	3	-7.53936	-3.32322	2.16e-252	33.9128	0.160709	6.55e-251
885	macc1	9	1	-0.146567	5.9127	3.43e-123	23.5756	0.111371	5.89e-122
886	cox6b2	6	2	-3.62104	-4.84941	2.56e-120	23.2938	0.110343	4.32e-119
887	tmod4	9	1	-1.27833	7.11134	1.34e-52	15.2181	0.0715061	1.4e-51
888	si:ch211-1i11.3	2	2	3.80113	-2.67436	2.9e-89	19.9973	0.0945557	4.07e-88
889	chrnb2	4	2	-1.16137	0.892806	6.17e-60	16.2863	0.0759105	6.84e-59
890	me1	2	2	2.58531	-1.00886	1.63e-75	18.3507	0.0865976	2.07e-74
891	prss35	8	1	-0.984247	7.93421	1.31e-193	29.6588	0.137911	3.17e-192
892	s100t	6	2	-2.6037	-4.65334	0	82.1166	0.389722	0
893	ext1a	4	2	1.16326	1.54052	1.35e-104	21.6873	0.102661	2.08e-103
894	slc4a7	9	1	-0.541866	5.74901	2.63e-76	18.4495	0.0872753	3.36e-75
895	si:ch211-269k10.2	9	1	0.265179	6.19264	6.42e-55	15.5637	0.073544	6.83e-54
896	rgl2	3	2	1.60748	-1.90198	9.02e-242	33.1845	0.157302	2.6e-240
897	sema6e	2	2	3.70733	-3.43141	0	48.5364	0.230244	0
898	steap4	7	2	-2.0783	-3.18964	1.65e-97	20.923	0.0954311	2.44e-96
899	itga8	1	1	0.749522	4.94119	1.31e-154	26.4626	0.125104	2.66e-153
900	col6a4a	1	1	2.17106	6.63084	8.08e-58	15.9854	0.0739839	8.81e-57
901	col14a1a	1	1	1.03398	5.15997	7.68e-170	27.7546	0.131288	1.68e-168
902	grhl2a	1	1	2.43011	5.21954	3.37e-101	21.3244	0.0994495	5.09e-100
903	ndufa3	6	2	-3.24179	-4.80846	5.38e-113	22.5598	0.106837	8.68e-112
904	efna3b	1	1	2.65068	5.41403	1.86e-160	26.9659	0.127099	3.88e-159
905	colq	3	2	0.717158	-1.77939	3.39e-291	36.4504	0.172709	1.21e-289
906	rbms3	2	2	2.35957	-0.315775	1.26e-217	31.4662	0.149166	3.34e-216
907	si:dkey-7j14.6	8	1	-2.09096	6.55859	5.73e-115	22.7599	0.107513	9.32e-114
908	chn2	2	2	3.42267	-1.67711	1.08e-101	21.3775	0.100936	1.64e-100
909	rps9	10	3	-8.11382	-3.42136	1.45e-255	34.1273	0.161797	4.46e-254
910	si:ch1073-90m23.1	7	2	0.0497792	-4.01681	9.46e-112	22.4326	0.10607	1.52e-110
911	mtmr11	3	2	2.07837	-1.93913	0	54.7289	0.259646	0
912	fbxo32	4	2	0.784259	-0.402976	3.28e-141	25.2716	0.119567	6.2e-140
913	creb5b	4	2	1.14931	0.253888	0	59.6665	0.282918	0
914	s100a10b	12	4	-8.91867	3.43888	2.75e-295	36.7077	0.17228	9.92e-294
915	sntb1	9	1	0.366789	6.33867	3.15e-126	23.8698	0.112824	5.52e-125
916	icn	12	4	-8.78094	3.32255	0	38.3872	0.181662	0
917	icn2	12	4	-8.78914	3.32144	1.01e-177	28.4	0.133633	2.31e-176
918	IGLON5	1	1	3.35604	4.82407	1.35e-201	30.2718	0.143168	3.38e-200
919	adar	5	2	2.51813	-3.36727	1.47e-98	21.0382	0.0995566	2.18e-97
920	adam22	1	1	2.87239	5.54465	6.76e-55	15.5604	0.0733853	7.18e-54
921	rpz5	9	1	-1.32035	6.32401	2.07e-86	19.667	0.0925566	2.84e-85
922	rps27.2	10	3	-7.81247	-4.01613	1.22e-186	29.1133	0.137988	2.88e-185
923	rspo3	4	2	0.791656	1.719	0	75.6842	0.358075	0
924	cyp4t8	2	2	4.12078	-3.16886	0	38.6367	0.183057	0
925	grb10b	9	1	-1.18352	6.39345	9.26e-55	15.5402	0.0734425	9.83e-54
926	cobl	4	2	1.70938	-0.171729	5.95e-64	16.8426	0.0796914	6.88e-63
927	rnf41l	11	2	-1.66854	-1.58384	5.01e-259	34.3599	0.16132	1.56e-257
928	sall3a	4	2	-0.817554	0.106422	3.96e-280	35.7449	0.169109	1.36e-278
929	apoeb	12	4	-8.87072	3.41709	4.23e-96	20.7678	0.0973564	6.18e-95
930	si:ch211-208k15.1	3	2	1.35407	-2.05015	1.27e-70	17.7284	0.0838898	1.55e-69
931	hmgn2	10	3	-7.64771	-3.17903	5.09e-107	21.9427	0.103874	7.95e-106
932	adgrb1a	2	2	4.11405	-3.35234	0	48.0573	0.227753	0
933	zfpm2a	1	1	2.00932	5.90387	2.39e-117	22.9989	0.108593	3.95e-116
934	nbeal2	3	2	1.62524	-1.39167	1.51e-150	26.1072	0.123701	3.02e-149
935	rims2a	3	2	-0.0247525	-0.868467	0	43.9385	0.208349	0
936	osbpl3b	4	2	1.04853	-0.309669	0	45.6897	0.216712	0
937	plekho1b	2	2	2.17412	-1.29838	1.38e-104	21.6863	0.102677	2.13e-103
938	cspg5a	1	1	2.63575	5.02505	2.01e-65	17.0417	0.0802366	2.37e-64
939	galnt1	1	1	1.61401	4.1083	9.08e-119	23.1404	0.109613	1.51e-117
940	tpbgb	11	2	-1.1553	-1.79333	0	39.2118	0.18552	0
941	fhod3b	1	1	1.56794	3.80877	2.18e-270	35.1124	0.166446	7.17e-269
942	hivep3b	4	2	1.09974	1.43696	0	38.4832	0.181848	0
943	CR848047.1	1	1	2.75692	5.43792	2.14e-241	33.1584	0.155564	6.16e-240
944	ptprub	1	1	1.25324	4.5846	0	50.7915	0.240941	0
945	si:ch73-22o12.1	1	1	0.717902	5.47219	3.36e-107	21.9615	0.104002	5.26e-106
946	pabpc1a	10	3	-7.3734	-4.12839	3.56e-74	18.1824	0.0860672	4.47e-73
947	ddr1	9	1	0.068354	6.70649	2.67e-126	23.8768	0.112911	4.68e-125
948	nr4a3	9	1	-0.229444	5.79308	0	56.3615	0.267288	0
949	atp1a3b	3	2	-0.361704	-3.34359	0	116.745	0.554285	0
950	bcam	1	1	1.07976	5.73196	0	38	0.18	0
951	si:dkey-26c10.5	2	2	2.59932	-1.93786	0	40.8083	0.19345	0
952	zgc:92606	5	2	1.73813	-4.45076	1.06e-238	32.971	0.156281	3.01e-237
953	rps19	10	3	-7.88096	-3.60805	0	38.7632	0.183822	0
954	dedd1	5	2	1.37955	-4.50887	4.59e-300	37.0059	0.175488	1.7e-298
955	s100a1	7	2	-2.19449	-3.45127	0	72.8497	0.345548	0
956	pou2f2a	1	1	2.98804	5.40845	2.05e-53	15.3404	0.072096	2.16e-52
957	myh14	3	2	0.182448	-2.06609	2.29e-111	22.3933	0.106061	3.66e-110
958	cadm4	9	1	0.296564	6.42747	0	54.8831	0.260389	0
959	gapdhs	7	2	-0.418161	-4.17543	0	76.9376	0.365174	0
960	CR854989.1	4	2	0.14791	0.571885	6.49e-64	16.8374	0.0787145	7.5e-63
961	fxyd6l	8	1	-1.83021	7.15175	1.77e-174	28.1361	0.133001	3.99e-173
962	rspo2	1	1	1.14009	5.98054	1.84e-111	22.4031	0.105532	2.94e-110
963	tmem145	4	2	-0.869921	0.772951	7.78e-107	21.9233	0.103787	1.22e-105
964	ndufb9	6	2	-2.3679	-4.91365	5.31e-87	19.7358	0.0934218	7.34e-86
965	GRIK2	4	2	-0.798552	0.745922	0	51.5777	0.244379	0
966	satb1b	2	2	2.82726	-2.0411	0	41.9319	0.198835	0
967	irx1a	7	2	-2.35412	-3.1718	8.44e-94	20.5118	0.0968302	1.21e-92
968	RIMS2	3	2	0.4949	-1.85531	0	60.7658	0.288317	0
969	si:dkey-17m8.1	3	2	-0.205298	-3.01786	2.1e-259	34.3852	0.163013	6.56e-258
970	triob	2	2	2.81475	-2.60577	0	64.5135	0.306145	0
971	rpl28	10	3	-7.74682	-3.82442	8.67e-284	35.9798	0.170602	3.01e-282
972	dnah5	3	2	0.951538	-1.2751	0	90.6696	0.430421	0
973	sipa1l1	1	1	1.52318	5.60351	6.44e-181	28.6576	0.135559	1.5e-179
974	ckbb	7	2	-0.305976	-4.17862	0	101.349	0.481144	0
975	man1a1	3	2	1.45704	-0.99152	0	51.0974	0.242431	0
976	sh3rf1	1	1	1.02251	5.83413	5.52e-74	18.1583	0.0857196	6.92e-73
977	fam184a	3	2	1.58842	-1.75934	0	58.7422	0.278716	0
978	zfp36l1b	8	1	-2.65508	6.58675	5.12e-98	20.9788	0.099043	7.59e-97
979	ivns1abpa	5	2	2.42937	-4.76853	0	55.8978	0.265148	0
980	slc35f1	9	1	0.319882	6.43278	8.4e-165	27.3339	0.12922	1.79e-163
981	igfbp3	8	1	-1.65337	6.7581	0	62.4769	0.295969	0
982	si:dkeyp-72h1.1	4	2	-0.153477	0.338298	0	109.942	0.520667	0
983	igfbp1a	8	1	-2.20517	6.55352	1.98e-230	32.3886	0.153005	5.48e-229
984	CRACD	3	2	0.916338	-3.38032	3.22e-54	15.4602	0.0731184	3.41e-53
985	rps7	10	3	-7.94451	-3.45568	0	38.2633	0.181444	0
986	bach2b	1	1	1.79739	4.81155	6.62e-147	25.7845	0.122121	1.3e-145
987	jag2b	3	2	1.98255	-2.70359	0	73.8713	0.350615	0
988	amd1	7	2	-0.38869	-3.83666	2.39e-125	23.7849	0.112672	4.18e-124
989	si:dkey-177p2.6	5	2	1.63652	-5.46427	1.51e-201	30.268	0.143468	3.79e-200
990	moxd1l	1	1	2.10486	5.51363	1.02e-53	15.3855	0.0715123	1.08e-52
991	map3k5	3	2	0.920705	-1.98289	5.54e-138	24.9762	0.118315	1.03e-136
992	afdna	2	2	2.20431	-0.3832	1.32e-201	30.2725	0.143493	3.31e-200
993	si:ch211-207i1.2	3	2	1.97974	-2.35272	0	48.1784	0.228517	0
994	thbs1b	8	1	-1.72946	6.7966	0	39.8589	0.18874	0
995	ankef1a	4	2	-0.727034	0.658815	6.8e-137	24.8758	0.117265	1.25e-135
996	chga	7	2	0.377381	-4.10433	3.22e-201	30.2431	0.143237	8.05e-200
997	lmx1a	2	2	3.45895	-2.1506	2.2e-146	25.738	0.121709	4.29e-145
998	plpp3	1	1	2.16071	6.61042	6.43e-53	15.2661	0.0719576	6.74e-52
999	flrt2	2	2	2.42777	-1.53163	1.86e-52	15.1966	0.0718103	1.95e-51
1000	fndc4a	3	2	0.840172	-1.51624	2.31e-110	22.29	0.105339	3.68e-109
1001	si:dkey-71h2.2	4	2	-0.200601	-0.467255	1.5e-261	34.5285	0.163436	4.75e-260
1002	si:ch211-278j3.3	4	2	-0.110942	-0.280818	3.49e-184	28.9185	0.136953	8.2e-183
1003	dab1a	2	2	3.75039	-3.31469	2.4e-123	23.5907	0.111696	4.14e-122
1004	otofa	2	2	2.80939	-3.01421	0	153.23	0.727611	0
1005	daam1b	1	1	1.65229	3.6486	2.22e-76	18.4587	0.0873414	2.84e-75
1006	fam228a	11	2	-1.03474	-1.73643	5.05e-296	36.7538	0.174153	1.84e-294
1007	clic5b	3	2	1.02134	-3.10568	0	54.0065	0.256225	0
1008	ppp4r4	11	2	-1.34895	-1.52141	5.26e-129	24.1358	0.11415	9.37e-128
1009	runx2b	4	2	-0.93719	0.794912	2.19e-120	23.3004	0.109616	3.71e-119
1010	fam49a	1	1	1.36879	5.0098	6.41e-97	20.8583	0.0986526	9.44e-96
1011	jun	5	2	2.00095	-5.89332	0	52.9506	0.25123	0
1012	itsn2a	1	1	1.75771	5.37322	2.14e-57	15.9246	0.0749924	2.32e-56
1013	ralgps2	1	1	1.36494	4.13303	1.87e-75	18.3432	0.0867731	2.37e-74
1014	kcnk3a	3	2	0.691787	-1.68254	1.73e-79	18.8412	0.0889393	2.27e-78
1015	pdcb	4	2	-1.13331	0.836407	1.7e-230	32.3934	0.149745	4.71e-229
1016	enpp1	1	1	1.06562	4.34964	7.3e-181	28.6533	0.135739	1.69e-179
1017	syne1a	4	2	1.02966	1.15818	8.74e-100	21.1715	0.100191	1.3e-98
1018	ptgs2b	9	1	-1.21395	6.24812	3.85e-92	20.3252	0.0925377	5.47e-91
1019	kita	3	2	1.49705	-1.64227	1.65e-213	31.1638	0.147694	4.31e-212
1020	ak7a	3	2	-0.380521	-2.22376	5e-156	26.5855	0.125936	1.03e-154
1021	dll4	7	2	-1.87349	-3.9612	4.18e-206	30.6124	0.145061	1.07e-204
1022	stxbp5a	2	2	2.327	-1.44279	8.37e-64	16.8223	0.0794862	9.66e-63
1023	AL929435.1	5	2	2.29362	-5.37664	4.04e-106	21.8482	0.103433	6.3e-105
1024	fosab	5	2	2.02297	-5.85134	0	54.4224	0.258203	0
1025	jdp2b	5	2	2.08067	-5.74903	0	48.9349	0.232152	0
1026	ezrb	9	1	0.180915	5.71131	5.97e-118	23.059	0.109131	9.89e-117
1027	si:dkey-52j6.3	3	2	0.65683	-1.69006	1.24e-293	36.6039	0.17349	4.45e-292
1028	rhoj	1	1	0.981562	5.53744	6.21e-70	17.6388	0.0831865	7.56e-69
1029	scg5	7	2	-1.33996	-4.53736	1.51e-234	32.6798	0.154895	4.26e-233
1030	syt14b	3	2	1.25004	-1.8322	0	42.7644	0.202807	0
1031	si:ch211-57i17.5	7	2	-2.34305	-4.01188	2.72e-145	25.6402	0.12139	5.27e-144
1032	si:ch73-21k16.1	4	2	1.03156	-0.332575	3.24e-168	27.6195	0.130816	7.04e-167
1033	cyp2ad3	2	2	4.17717	-3.58806	8.46e-135	24.6814	0.116755	1.54e-133
1034	rasl11b	8	1	-2.68959	6.68212	9e-64	16.8181	0.0790476	1.04e-62
1035	dtnba	1	1	0.627761	5.87979	1.11e-58	16.1088	0.076111	1.22e-57
1036	cd109	1	1	2.31495	5.26512	3.19e-105	21.7536	0.102113	4.94e-104
1037	calm1b	7	2	-0.930215	-4.17152	0	83.7589	0.397581	0
1038	col12a1b	1	1	2.13495	6.54199	2.73e-146	25.7295	0.1213	5.32e-145
1039	sesn1	2	2	3.27791	-2.66796	0	40.373	0.191465	0
1040	hsp90ab1	10	3	-7.54915	-4.01952	1.97e-236	32.8123	0.155561	5.56e-235
1041	cnih3	3	2	2.06768	-2.29954	1.3e-67	17.334	0.0819095	1.55e-66
1042	nrxn3b	3	2	0.839157	-1.14332	0	103.276	0.490291	0
1043	foxo3b	2	2	4.36621	-3.10533	1.75e-94	20.5883	0.0974563	2.52e-93
1044	afg1lb	2	2	3.54501	-3.57477	1.2e-82	19.2224	0.0908932	1.6e-81
1045	lbr	5	2	1.48586	-3.58396	4.93e-107	21.9441	0.103883	7.72e-106
1046	enah	2	2	2.32853	-0.276756	4.17e-61	16.4503	0.0778388	4.69e-60
1047	six1b	6	2	-3.52061	-3.10594	8.28e-108	22.0251	0.104314	1.3e-106
1048	cyp2p6	2	2	4.04207	-3.52021	1.79e-147	25.835	0.122054	3.53e-146
1049	rtn1b	4	2	1.04255	0.205601	7.43e-61	16.4153	0.0775427	8.34e-60
1050	zgc:193541	6	2	-3.41806	-4.83518	6.32e-157	26.663	0.126339	1.3e-155
1051	hsp90aa1.2	5	2	1.9839	-5.24534	0	80.3325	0.381294	0
1052	rps29	10	3	-7.7026	-3.98268	3.81e-254	34.0315	0.161353	1.17e-252
1053	palld	2	2	3.04508	-2.05357	0	72.9229	0.346099	0
1054	cyp39a1	3	2	0.0289368	-2.67964	7.39e-108	22.0302	0.104235	1.16e-106
1055	rcan2	4	2	0.97251	0.333554	1.18e-131	24.3868	0.1154	2.13e-130
1056	adgrg6	9	1	-0.107866	6.05692	0	38.472	0.182389	0
1057	hivep2a	2	2	2.69334	-0.551845	0	40.131	0.190334	0
1058	CT027638.1	3	2	1.16084	-4.11922	0	77.4118	0.367407	0
1059	clu	4	2	0.821392	-0.212669	1.19e-68	17.4709	0.0823591	1.44e-67
1060	atf3	8	1	-2.681	6.2474	3.73e-168	27.6144	0.130781	8.1e-167
1061	si:ch211-147d7.5	6	2	-2.65241	-4.75677	7.38e-55	15.5548	0.073501	7.84e-54
1062	tpd52l1	3	2	0.87792	-1.13737	0	41.2259	0.195514	0
1063	nkain2	1	1	3.1158	5.37617	7.17e-248	33.6047	0.158958	2.11e-246
1064	pkib	2	2	2.50963	-1.046	4.74e-116	22.8689	0.108141	7.75e-115
1065	serinc1	7	2	-0.285356	-4.13199	4e-203	30.3877	0.144039	1.01e-201
1066	fut8b	2	2	3.17535	-2.34512	9.42e-71	17.745	0.0838774	1.15e-69
1067	sptlc2b	5	2	2.62725	-3.11022	2.05e-289	36.3378	0.172306	7.2e-288
1068	kif3ca	4	2	0.911782	1.71935	1.06e-95	20.7235	0.0973762	1.55e-94
1069	lin28b	1	1	1.73529	4.69517	1.55e-58	16.088	0.0758769	1.7e-57
1070	faua	10	3	-8.06496	-3.34637	2.02e-220	31.6699	0.150122	5.4e-219
1071	klhl29	3	2	0.526243	-2.10561	1.36e-154	26.461	0.125354	2.78e-153
1072	phactr1	5	2	2.54129	-4.82848	1.61e-102	21.4662	0.101542	2.45e-101
1073	lmx1bb	1	1	2.04739	6.05219	0	53.6227	0.253862	0
1074	AL808129.1	3	2	-0.443937	-2.98483	4.5e-64	16.8591	0.0796838	5.21e-63
1075	trim36	7	2	-1.59151	-3.6611	1.63e-111	22.4083	0.106076	2.62e-110
1076	rimbp2	1	1	2.08113	3.47728	1.6e-90	20.1413	0.0949277	2.26e-89
1077	rimbp2.1	3	2	0.732718	-1.61112	0	47.0864	0.223315	0
1078	xpr1a	2	2	1.92949	-1.22825	5.79e-54	15.4224	0.0728429	6.11e-53
1079	stc1	2	2	4.23675	-3.36807	4e-278	35.6157	0.168498	1.36e-276
1080	pbx3b	3	2	1.60614	-0.534347	0	49.1375	0.23311	0
1081	b2ml	7	2	-0.0215199	-4.25068	6.86e-241	33.1233	0.157042	1.97e-239
1082	loxhd1b	4	2	-1.13099	0.763446	0	86.8985	0.411006	0
1083	efhd2	9	1	-0.973883	6.05845	1.07e-73	18.1218	0.0855107	1.34e-72
1084	rfk	5	2	1.83917	-4.90432	3.61e-68	17.4076	0.0822943	4.34e-67
1085	kcnd3	2	2	2.60375	-0.888144	0	50.3957	0.238865	0
1086	ahcyl1	8	1	-0.991578	7.92599	1.12e-142	25.4045	0.120319	2.16e-141
1087	kcnn1b	2	2	3.18617	-2.67351	0	43.5139	0.206234	0
1088	golga1	3	2	2.05351	-2.15037	6.57e-125	23.7425	0.112453	1.14e-123
1089	ppdpfa	6	2	-4.56752	-3.89315	0	45.4966	0.2155	0
1090	hsp70l	5	2	1.92985	-5.25872	0	86.7847	0.411965	0
1091	tmem127	5	2	2.33225	-4.99646	4.92e-76	18.4157	0.0870885	6.27e-75
1092	dynll1	6	2	-3.58016	-4.16844	1.77e-136	24.8374	0.11762	3.25e-135
1093	tmem47	8	1	-1.88382	7.0202	8.95e-78	18.6314	0.0880271	1.16e-76
1094	rpl6	10	3	-7.55188	-4.11148	1.87e-183	28.8605	0.136793	4.37e-182
1095	msi1	9	1	0.241797	6.55547	0	38.7964	0.183802	0
1096	plxnb3	1	1	1.64188	4.58503	1.69e-116	22.9138	0.108439	2.77e-115
1097	sema6bb	1	1	0.937388	4.71277	5.7e-113	22.5572	0.10676	9.19e-112
1098	aak1a	3	2	1.63429	-1.30368	7.87e-74	18.1388	0.0858434	9.84e-73
1099	sort1b	4	2	-0.571033	-0.0399309	1.38e-199	30.1186	0.142657	3.44e-198
1100	atoh1a	7	2	-2.27007	-3.91163	0	59.3355	0.28144	0
1101	grid2	1	1	3.40815	5.08647	5.03e-121	23.3634	0.110422	8.51e-120
1102	fgfr1a	9	1	0.27188	6.46399	1.31e-91	20.2652	0.0957474	1.85e-90
1103	ampd2b	3	2	1.02897	-2.41467	4.98e-178	28.4249	0.134685	1.14e-176
1104	cox6a1	6	2	-2.67397	-4.96177	7.52e-270	35.0771	0.166319	2.46e-268
1105	slc25a25a	5	2	2.18399	-5.77124	2.78e-165	27.3742	0.129666	5.95e-164
1106	espn	3	2	1.57574	-1.33355	0	51.6305	0.244964	0
1107	lonrf1l	6	2	-3.20817	-3.11438	7.65e-53	15.2548	0.0721057	8.01e-52
1108	fam102aa	2	2	4.23662	-3.24051	3.25e-69	17.545	0.0829172	3.93e-68
1109	ybx1	10	3	-7.61238	-3.61737	1.05e-175	28.2362	0.133816	2.38e-174
1110	rasal1b	11	2	-1.08622	-1.66794	3.14e-88	19.8782	0.0937722	4.37e-87
1111	rassf2a	2	2	3.72401	-3.4411	2.5e-154	26.4381	0.125217	5.09e-153
1112	skia	1	1	1.47992	3.95545	1.85e-125	23.7957	0.112725	3.23e-124
1113	gadd45ga	6	2	-4.30495	-4.08051	9.45e-72	17.8737	0.0845206	1.17e-70
1114	cux2b	1	1	2.94952	5.37915	2e-64	16.9069	0.0797514	2.33e-63
1115	atp2b3a	2	2	3.45426	-1.70838	3.86e-249	33.6914	0.159509	1.15e-247
1116	frmd3	2	2	2.80783	-1.81978	0	50.7572	0.240773	0
1117	st6galnac5b	8	1	-1.25478	7.86432	5.01e-84	19.3866	0.0857726	6.76e-83
1118	plch2a	9	1	0.126909	5.85275	0	57.0069	0.270445	0
1119	atp5pb	6	2	-3.15635	-4.88477	1.97e-95	20.6937	0.097976	2.86e-94
1120	slc44a5b	9	1	0.105825	6.68289	4.47e-138	24.9848	0.118115	8.31e-137
1121	pptc7a	5	2	2.51602	-5.30983	1.12e-101	21.3758	0.101212	1.7e-100
1122	pim2	8	1	-2.62385	6.25953	5.13e-52	15.1301	0.0714296	5.34e-51
1123	erich3	3	2	0.952379	-3.56628	0	53.2351	0.252543	0
1124	ntng2a	2	2	2.89146	-0.790168	2.17e-149	26.0051	0.122804	4.3e-148
1125	elavl4	1	1	3.42716	5.09682	3.51e-250	33.7625	0.159594	1.06e-248
1126	ndufa7	6	2	-2.97377	-4.72036	1.93e-106	21.8821	0.103583	3.01e-105
1127	si:ch211-218o21.4	7	2	-0.429018	-3.91278	0	72.1977	0.342651	0
1128	rpl10a	10	3	-7.98168	-3.63693	2.29e-233	32.5966	0.154527	6.42e-232
1129	inavaa	6	2	-4.68056	-3.65483	0	39.8769	0.18826	0
1130	trabd2b	2	2	3.34345	-3.56127	1.27e-160	26.98	0.127687	2.65e-159
1131	ppiaa	10	3	-7.84547	-2.97198	1.01e-291	36.4836	0.17292	3.6e-290
1132	ulk1a	11	2	-1.28721	-1.34061	4.78e-66	17.1256	0.080984	5.63e-65
1133	prex1	3	2	1.59659	-1.23711	3.74e-141	25.2664	0.119676	7.07e-140
1134	si:ch211-163l21.7	7	2	-2.41634	-3.27483	0	39.6567	0.18697	0
1135	plxna3	1	1	1.70603	4.8231	2.21e-177	28.3725	0.13441	5.03e-176
1136	gripap1	3	2	1.31585	-0.960602	3.16e-67	17.283	0.0817732	3.75e-66
1137	sept5a	6	2	-4.57356	-3.70447	3.85e-225	32.0109	0.151148	1.05e-223
1138	tcf7l1b	1	1	0.964962	4.87315	2.27e-196	29.8721	0.141525	5.56e-195
1139	kazna	4	2	-1.12699	0.872634	6.18e-84	19.3758	0.0916303	8.33e-83
1140	glis1b	4	2	0.925711	1.86009	0	79.8191	0.378329	0
1141	rfx2	3	2	1.59525	-1.66786	9.1e-268	34.9403	0.165665	2.95e-266
1142	si:ch211-263k4.2	2	2	3.33809	-3.55322	0	69.3723	0.329174	0
1143	si:ch211-263k4.2.1	2	2	3.28013	-3.5592	2.85e-160	26.95	0.12756	5.95e-159
1144	kcnd1	4	2	0.363836	0.358238	0	64.5143	0.305672	0
1145	sema3ga	2	2	3.65093	-3.54085	2.58e-258	34.3122	0.162527	8.02e-257
1146	si:ch211-254n4.3	2	2	1.68919	-0.958619	1.03e-241	33.1805	0.157278	2.97e-240
1147	col2a1a	1	1	1.75319	6.11013	0	45.8906	0.217531	0
1148	BCR	9	1	-0.778126	7.51494	1.16e-112	22.5256	0.105481	1.87e-111
1149	hmcn2	1	1	1.8387	5.7773	1.57e-216	31.3861	0.148123	4.15e-215
1150	zgc:153738	7	2	-1.92339	-3.99063	9.98e-57	15.828	0.0748282	1.08e-55
1151	ralgps1	2	2	3.24967	-2.38831	3.42e-79	18.8053	0.0889516	4.46e-78
1152	mknk2b	5	2	2.02555	-5.52083	1.38e-160	26.9768	0.127837	2.89e-159
1153	agbl4	1	1	2.05759	3.60408	8.52e-89	19.9436	0.0943734	1.19e-87
1154	acsl2	9	1	-0.0403365	5.91587	8.06e-77	18.5133	0.0873278	1.03e-75
1155	bmp1a	1	1	0.81347	5.76414	7.31e-130	24.2173	0.114518	1.3e-128
1156	dusp2	8	1	-2.34668	6.36273	4.36e-114	22.6707	0.106835	7.08e-113
1157	cebpb	12	4	-8.83422	3.37829	2.34e-71	17.823	0.0840133	2.88e-70
1158	tuba8l	8	1	-2.79874	6.43834	1.29e-115	22.825	0.107852	2.11e-114
1159	agbl4.1	3	2	1.60584	-1.94109	0	61.753	0.29303	0
1160	KIF2A	5	2	1.98058	-3.5526	1.83e-95	20.6973	0.0979683	2.66e-94
1161	pcsk5b	1	1	1.48733	5.30432	1.8e-75	18.3452	0.0866818	2.29e-74
1162	COX5B	6	2	-3.63507	-4.18979	2.01e-142	25.3816	0.120198	3.86e-141
1163	BX511073.1	11	2	-1.03212	-1.68692	5.56e-138	24.9761	0.118045	1.03e-136
1164	luzp1	1	1	1.69753	5.93299	3.43e-63	16.7386	0.0788175	3.94e-62
1165	2022-03-01	2	2	2.95868	-2.68953	0	38.9025	0.184411	0
1166	daam1a	9	1	-0.228394	6.99259	4.26e-65	16.9979	0.0803989	4.98e-64
1167	col12a1a	1	1	2.11979	6.63147	6.2e-58	16.0019	0.0755723	6.77e-57
1168	si:dkey-288a3.2	3	2	1.52056	-2.36587	0	40.7128	0.193068	0
1169	grid1a	2	2	3.49417	-3.10759	0	57.8308	0.274341	0
1170	meis2a.1	2	2	1.71512	-1.03635	1.11e-83	19.3458	0.0914105	1.49e-82
1171	si:rp71-62i8.1	9	1	0.375135	6.21622	1.61e-69	17.5848	0.0829653	1.95e-68
1172	marcksb	10	3	-7.62927	-3.06117	5.4e-117	22.9635	0.107982	8.9e-116
1173	insm1b	6	2	-4.78507	-3.80953	1.67e-224	31.9651	0.14763	4.52e-223
1174	kctd3	5	2	2.59959	-3.93461	6.53e-114	22.6529	0.107244	1.06e-112
1175	syne1b	3	2	0.141025	-1.17295	0	58.2105	0.276218	0
1176	malb	6	2	-3.42888	-4.0487	5.09e-103	21.5197	0.101557	7.78e-102
1177	sox11a	8	1	-2.70251	6.5414	8.18e-155	26.4803	0.125169	1.67e-153
1178	cox7a2a	6	2	-2.81302	-4.88784	2.02e-300	37.0281	0.175572	7.49e-299
1179	akap6	2	2	2.96232	-0.444081	5.22e-105	21.731	0.102719	8.06e-104
1180	ank3a	2	2	1.96539	-1.17507	3.67e-208	30.7666	0.14582	9.43e-207
1181	ush2a	2	2	3.14738	-2.25869	0	76.6761	0.363946	0
1182	slc8a1b	2	2	2.95942	-0.415598	5.39e-55	15.5749	0.0735048	5.74e-54
1183	ehbp1	2	2	2.94649	-1.32231	7.72e-199	30.0615	0.142487	1.92e-197
1184	ndnfl	8	1	-1.58549	7.71744	7.31e-125	23.738	0.111241	1.27e-123
1185	prox1a	4	2	0.805162	1.71934	0	72.4854	0.343644	0
1186	ttc7b	4	2	1.21365	-0.341926	1.76e-69	17.5799	0.0831413	2.13e-68
1187	cnsta	3	2	2.08573	-1.90731	0	39.2654	0.186181	0
1188	snx9a	5	2	2.33135	-3.00532	7.82e-73	18.0122	0.0852208	9.73e-72
1189	si:dkey-248g15.3	12	4	-8.88998	3.43606	0	40.3829	0.187045	0
1190	esrrga	2	2	3.20867	-1.22959	8.75e-86	19.5937	0.0926536	1.2e-84
1191	kif26ab	1	1	0.977725	5.30924	5.15e-98	20.9785	0.0991956	7.63e-97
1192	myo6b	3	2	0.465597	-1.10072	0	109.151	0.518204	0
1193	si:dkey-206p8.1	3	2	1.8965	-2.04355	3.6e-72	17.9274	0.0847771	4.46e-71
1194	wdpcp	2	2	2.10623	-1.19936	3.22e-164	27.2848	0.129256	6.84e-163
1195	ANKRD66	3	2	-0.183593	-0.980692	3.58e-147	25.8083	0.12215	7.02e-146
1196	kif28	3	2	1.06273	-2.93173	3.66e-125	23.7671	0.112545	6.39e-124
1197	calm1a	3	2	1.36653	-1.56662	0	64.5779	0.30642	0
1198	si:rp71-84d9.1	3	2	1.75068	-1.76571	6.61e-190	29.3701	0.139179	1.59e-188
1199	mycbp	6	2	-3.2794	-4.10988	2.85e-123	23.5835	0.111663	4.91e-122
1200	ccdc88c	3	2	0.193939	-1.4299	0	46.2628	0.21946	0
1201	peli1b	4	2	0.602748	0.155652	1.35e-138	25.0325	0.118579	2.53e-137
1202	lpin1	5	2	1.54947	-4.52848	4.07e-125	23.7627	0.112535	7.08e-124
1203	snap25b	2	2	4.48144	-2.50964	1.59e-67	17.3226	0.0817811	1.89e-66
1204	si:dkey-221l4.10	9	1	-0.901213	6.3417	4.41e-82	19.1549	0.0902808	5.87e-81
1205	otofb	3	2	-0.255923	-2.61259	0	128.264	0.608998	0
1206	isca2	7	2	-1.01852	-3.89095	9.19e-54	15.3925	0.0727312	9.66e-53
1207	chrm3a	2	2	2.27873	-0.794718	7.99e-179	28.4891	0.134542	1.83e-177
1208	atp5if1b	6	2	-2.29149	-4.91593	1.94e-85	19.5532	0.0925586	2.64e-84
1209	rpl13a	10	3	-7.83606	-4.06049	3.4e-265	34.7704	0.16486	1.09e-263
1210	crim1	1	1	1.29296	4.42712	4.86e-82	19.1497	0.090634	6.47e-81
1211	rcan3	7	2	-1.88622	-3.53938	2.14e-145	25.6496	0.121505	4.15e-144
1212	ttc6	4	2	0.343173	0.0421308	6.48e-95	20.6363	0.0976982	9.38e-94
1213	EML5	3	2	-0.115987	-1.1454	0	41.7205	0.197857	0
1214	ryr2b	2	2	3.06177	-3.12941	3.94e-151	26.1585	0.123778	7.9e-150
1215	kif13ba	3	2	1.18264	-1.09055	0	42.0095	0.199245	0
1216	bmp2a	3	2	0.86823	-2.53237	0	45.7535	0.216399	0
1217	mipol1	4	2	0.287935	-0.0253455	3.9e-72	17.923	0.0848233	4.82e-71
1218	abhd12	3	2	-0.516999	-3.11441	0	63.628	0.301944	0
1219	bmp4	8	1	-1.73182	7.71469	4.12e-106	21.8473	0.103202	6.42e-105
1220	srrm1	3	2	1.03665	-3.7236	1.92e-75	18.3419	0.0868191	2.43e-74
1221	coch	8	1	-1.49044	7.56284	5.46e-281	35.8003	0.169364	1.88e-279
1222	hspa4l	3	2	0.920177	-3.70207	1.42e-188	29.2657	0.138686	3.38e-187
1223	foxn3	1	1	1.80099	5.91324	1.49e-116	22.9193	0.108458	2.45e-115
1224	atp6v1ba	7	2	-1.61605	-3.87943	4.14e-137	24.8957	0.11792	7.64e-136
1225	clic4	9	1	-0.113236	5.78235	6.69e-130	24.221	0.114551	1.19e-128
1226	rps6ka1	1	1	1.02209	4.25403	1.36e-54	15.5156	0.0733468	1.44e-53
1227	ccr6b	4	2	-0.0464545	0.374481	6.11e-122	23.4533	0.104726	1.04e-120
1228	edrf1	5	2	1.87443	-4.93953	1.34e-70	17.7252	0.0838308	1.64e-69
1229	atp6v1c2	4	2	-0.0780068	0.29599	0	67.4342	0.319644	0
1230	nrxn3a	3	2	1.97122	-2.01042	0	88.3675	0.419482	0
1231	nfkbiab	8	1	-2.68711	6.44975	1.18e-71	17.8611	0.0844658	1.46e-70
1232	fbxo34	3	2	1.07906	-0.920714	5.47e-91	20.1945	0.0955649	7.72e-90
1233	elmsan1b	2	2	3.14487	-0.339573	1.78e-139	25.1132	0.118977	3.35e-138
1234	fut8a	3	2	1.66973	-1.70141	0	75.5694	0.358683	0
1235	irf2bpl	5	2	2.03213	-5.2418	1.95e-53	15.3436	0.0725517	2.05e-52
1236	clic5a	2	2	3.08409	-3.0724	0	65.3825	0.310203	0
1237	ahsa1b	5	2	2.01709	-4.98153	6.57e-182	28.7371	0.13617	1.53e-180
1238	gpx2	7	2	-1.18603	-4.31903	0	64.1079	0.304224	0
1239	id3	8	1	-2.75219	6.57075	9.11e-181	28.6455	0.135465	2.11e-179
1240	si:ch211-266g18.6	9	1	-1.17403	6.22939	8.81e-220	31.6234	0.148473	2.35e-218
1241	crip2	2	2	3.99653	-3.46559	1.39e-248	33.6534	0.159328	4.13e-247
1242	fabp7a	8	1	-2.25543	7.06166	0	40.1901	0.190166	0
1243	id2a	10	3	-7.35141	-3.57501	2.05e-151	26.1834	0.123994	4.13e-150
1244	tagapa	5	2	2.20948	-3.53112	0	51.6066	0.2448	0
1245	ppp1cb	7	2	-0.318863	-4.13716	1.83e-93	20.4742	0.0969287	2.61e-92
1246	plekhh1	1	1	0.727857	5.95104	1.32e-81	19.0976	0.0903004	1.76e-80
1247	pacrg	3	2	1.41533	-2.477	0	40.5088	0.192106	0
1248	lrfn5a	3	2	1.372	-0.709084	0	53.7037	0.254787	0
1249	qkia	1	1	1.77813	5.95636	7.26e-175	28.1678	0.133351	1.64e-173
1250	crip3	8	1	-1.6515	7.31159	3.73e-119	23.1788	0.109525	6.23e-118
1251	zgc:162989	7	2	-1.85395	-4.26667	0	52.5614	0.249355	0
1252	NPAS3	1	1	1.93154	5.83265	0	37.5666	0.178019	0
1253	tgfb3	5	2	2.14857	-5.10163	9.68e-65	16.9497	0.0801447	1.13e-63
1254	SAMD5	1	1	1.0956	4.84325	2.7e-92	20.3426	0.0961225	3.84e-91
1255	KLHL29	2	2	3.89697	-3.02345	0	92.6494	0.439688	0
1256	fosl2	9	1	-0.424291	5.80218	5.16e-194	29.6901	0.140589	1.25e-192
1257	CR377229.1	2	2	3.16787	-1.43441	9.96e-189	29.2777	0.138678	2.38e-187
1258	stc2a	2	2	2.27482	-1.51664	2.04e-172	27.9672	0.132496	4.53e-171
1259	tmsb1	12	4	-8.83434	3.37762	0	58.9864	0.277634	0
1260	hspa9	3	2	0.807745	-4.04519	4.78e-84	19.389	0.0917808	6.45e-83
1261	arhgef9b	11	2	-1.13458	-1.4733	7.24e-70	17.6301	0.0829492	8.81e-69
1262	pcdh1b	1	1	1.24934	4.55743	4.66e-266	34.8275	0.165067	1.51e-264
1263	TENM2	2	2	2.47964	-2.09067	0	119.014	0.565078	0
1264	cabp2b	4	2	-0.797546	-0.0641142	0	119.652	0.567951	0
1265	fgfrl1a	9	1	0.410067	6.20139	0	48.6433	0.230649	0
1266	pcdh10b	8	1	-1.94748	6.81587	4.1e-62	16.5902	0.0783183	4.66e-61
1267	prss23	8	1	-1.24228	7.80437	8.39e-73	18.0083	0.0850037	1.04e-71
1268	adh5	10	3	-7.85262	-3.01726	3.91e-55	15.5954	0.0736167	4.17e-54
1269	slc43a1a	5	2	2.65534	-3.08057	6.11e-97	20.8606	0.0987322	9e-96
1270	arhgef6	3	2	0.431753	-1.18603	7.07e-93	20.4082	0.0966244	1.01e-91
1271	CR786577.1	1	1	3.45411	5.09384	3.52e-65	17.0091	0.0799607	4.12e-64
1272	lingo2a	4	2	1.59787	-0.0154061	1.64e-96	20.8134	0.098426	2.4e-95
1273	anxa5a	4	2	-1.0071	-0.183542	0	65.9251	0.312703	0
1274	fgf24	8	1	-1.22973	7.82944	0	50.8999	0.2399	0
1275	slitrk4	4	2	-1.13873	0.60197	4.61e-164	27.2716	0.12862	9.8e-163
1276	fam13b	3	2	0.853057	-2.0304	6.81e-114	22.651	0.107287	1.1e-112
1277	aff2	4	2	0.961666	0.433831	0	42.3024	0.20063	0
1278	hnrnpa0b	6	2	-4.99302	-4.00824	2.57e-58	16.0566	0.0759456	2.81e-57
1279	cxcl14	8	1	-1.67516	7.66088	0	41.8696	0.198302	0
1280	fam149a	2	2	3.42141	-3.59633	0	103.373	0.49067	0
1281	cyp4v7	2	2	3.5019	-3.57677	0	58.6196	0.278002	0
1282	stard15	2	2	2.48676	-2.03021	0	82.1995	0.390157	0
1283	prom1a	9	1	0.29856	6.45357	0	53.6871	0.254637	0
1284	slit3	1	1	2.05179	5.88453	0	52.7066	0.249546	0
1285	grxcr1a	5	2	2.17305	-4.26545	0	40.9023	0.193907	0
1286	atp8a1	3	2	1.08534	-1.56861	0	55.7969	0.264743	0
1287	ebf3a	1	1	1.34061	4.45546	1.31e-199	30.1203	0.142771	3.26e-198
1288	mtnr1ab	4	2	-1.01249	0.757622	0	52.9366	0.248688	0
1289	tubb4b	6	2	-3.95375	-4.04766	4.04e-169	27.6948	0.131191	8.81e-168
1290	eef1g	10	3	-7.77501	-3.37249	1.84e-150	26.0997	0.123658	3.67e-149
1291	rpl39	10	3	-7.66316	-3.70627	3.66e-274	35.3589	0.167653	1.23e-272
1292	gria3b	1	1	3.4046	5.10392	1.68e-65	17.0523	0.0802867	1.98e-64
1293	dusp1	8	1	-2.64916	6.19785	9.56e-61	16.4	0.077419	1.07e-59
1294	zgc:66433	11	2	-1.24023	-1.4572	2.51e-84	19.422	0.0917847	3.4e-83
1295	zgc:92242	1	1	0.789467	5.72138	0	38.2934	0.181424	0
1296	ppargc1b	4	2	-0.071012	0.234089	8.93e-93	20.3968	0.0965604	1.27e-91
1297	ahnak	1	1	2.04316	6.26283	2.07e-260	34.4524	0.163124	6.52e-259
1298	gabrb2a	3	2	0.802569	-1.63355	1.43e-104	21.6847	0.102408	2.2e-103
1299	pls3	1	1	1.51371	5.51052	5.42e-93	20.4212	0.0964199	7.73e-92
1300	uqcrq	6	2	-3.26961	-4.78789	1.9e-145	25.6541	0.121537	3.69e-144
1301	sfxn5b	2	2	3.26029	-2.42704	7.7e-156	26.5692	0.125811	1.58e-154
1302	fgf13a	1	1	1.9911	4.32532	2.38e-66	17.1661	0.0811264	2.81e-65
1303	pcdh11	1	1	2.08611	3.56343	3.61e-85	19.5214	0.0921992	4.91e-84
1304	nlgn3a	2	2	2.09421	-0.318863	1.12e-54	15.5279	0.073442	1.19e-53
1305	mtus1a	3	2	1.05592	-2.85922	0	59.0026	0.279973	0
1306	ndufa1	6	2	-2.45834	-4.92908	2.88e-179	28.5249	0.135187	6.62e-178
1307	prelid1a	7	2	-1.01524	-3.544	1.04e-55	15.6795	0.0741255	1.12e-54
1308	gpc4	1	1	1.05077	5.67551	7.56e-176	28.2479	0.133585	1.71e-174
1309	mcf2a	2	2	2.44571	-2.04896	2.03e-133	24.5526	0.116268	3.68e-132
1310	diaph2	1	1	1.30697	4.395	4.04e-157	26.6798	0.12643	8.31e-156
1311	fstl5	2	2	4.52983	-2.55255	4.68e-208	30.7587	0.145488	1.2e-206
1312	acsl4a	5	2	2.62522	-5.19596	8.98e-76	18.383	0.086907	1.14e-74
1313	gpc3	4	2	1.06892	1.51007	0	71.0117	0.336579	0
1314	si:ch211-203d1.3	4	2	-0.341371	0.0544793	5.66e-117	22.9615	0.108634	9.31e-116
1315	rapgef2	2	2	2.15153	-0.329855	1.77e-116	22.9119	0.108535	2.9e-115
1316	pdgfc	1	1	1.25889	4.46832	7.55e-96	20.74	0.0980543	1.1e-94
1317	spock1	2	2	1.88121	-1.14085	6.51e-165	27.3432	0.129557	1.39e-163
1318	CR383676.3	3	2	1.15607	-2.22138	9.15e-52	15.0919	0.0713408	9.52e-51
1319	CR383676.2	2	2	2.33121	-0.298562	0	38.9536	0.184694	0
1320	pcdh19	1	1	1.40253	5.35969	7.49e-287	36.1751	0.171482	2.61e-285
1321	elf1	1	1	0.885704	5.34312	2.75e-96	20.7886	0.0983598	4.02e-95
1322	ENSDARG00000076547	4	2	0.714436	-0.0118602	9.15e-93	20.3956	0.0962261	1.3e-91
1323	zdhhc2	3	2	0.448099	-1.84288	2.86e-57	15.9064	0.0751884	3.1e-56
1324	htr4	4	2	-0.000794676	0.347179	2.51e-115	22.796	0.107576	4.09e-114
1325	si:dkey-280e21.3	7	2	-0.106383	-4.00794	0	68.1468	0.323389	0
1326	cplx2	3	2	2.01587	-2.39049	0	45.1366	0.214084	0
1327	drp2	4	2	0.96947	1.7425	0	38.9569	0.184262	0
1328	glra1	2	2	2.93335	-1.81535	5.11e-81	19.0269	0.0899974	6.75e-80
1329	nocta	9	1	-0.603011	5.80784	2.4e-102	21.4477	0.101552	3.64e-101
1330	egr1	8	1	-2.03411	6.25392	0	42.3453	0.200701	0
1331	ogt.1.1	3	2	1.11667	-2.24351	1.53e-56	15.8012	0.0747187	1.65e-55
1332	slc25a5	10	3	-7.59521	-4.13945	0	40.4092	0.191648	0
1333	gstp1	6	2	-2.74696	-4.6964	0	48.6169	0.230605	0
1334	glod5	7	2	-1.35385	-4.54928	5.73e-60	16.2908	0.0770277	6.36e-59
1335	si:ch211-235e9.6	6	2	-3.18934	-4.53664	1.74e-84	19.441	0.0919972	2.35e-83
1336	mgat4b	1	1	1.06843	4.40226	2.14e-291	36.463	0.172902	7.62e-290
1337	sparc	8	1	-2.30173	6.99914	0	64.8634	0.307626	0
1338	si:ch211-153b23.5	6	2	-4.45172	-3.78226	1.27e-305	37.35	0.176389	4.8e-304
1339	rack1	10	3	-7.94602	-3.37093	1.51e-200	30.192	0.143102	3.77e-199
1340	fosl1a	8	1	-1.98258	6.1177	0	45.2909	0.21475	0
1341	cpeb4a	5	2	1.21799	-4.36206	3.09e-60	16.3286	0.0771764	3.43e-59
1342	mid1ip1l	8	1	-2.40118	7.00054	5.73e-61	16.4311	0.0775383	6.44e-60
1343	anxa6	3	2	2.11251	-2.27354	0	38.1457	0.180775	0
1344	frmpd3	2	2	2.68959	-2.61324	0	62.9661	0.29866	0
1345	limch1b	9	1	-0.0897021	6.9104	5.35e-158	26.7554	0.126781	1.11e-156
1346	tnip1	7	2	-1.60364	-3.53748	3.56e-81	19.0458	0.0901439	4.71e-80
1347	rtn4rl2b	7	2	-0.176036	-4.07358	0	56.201	0.266637	0
1348	hbegfa	11	2	-1.43317	-1.78438	2.31e-138	25.0111	0.11826	4.31e-137
1349	ctsf	7	2	-0.208616	-4.23325	3.59e-64	16.8725	0.0798239	4.16e-63
1350	nanos1	8	1	-2.30703	7.13044	1.01e-104	21.7006	0.102641	1.56e-103
1351	unc5a	4	2	1.06482	0.384694	0	39.7519	0.188515	0
1352	cryba1l1	4	2	-0.532894	0.131026	0	39.2757	0.185424	0
1353	lyar	7	2	-1.42035	-4.42973	5.42e-58	16.0103	0.0756398	5.92e-57
1354	ATP8A1	3	2	1.00224	-1.72291	0	65.2243	0.309497	0
1355	LO018188.1	11	2	-1.66938	-1.58272	9.42e-63	16.6783	0.0788813	1.08e-61
1356	sncb	7	2	-1.12013	-3.224	7.48e-139	25.0561	0.118655	1.4e-137
1357	lrmda	2	2	2.4813	-1.50822	3.33e-115	22.7836	0.107823	5.43e-114
1358	scdb	2	2	3.53798	-3.61246	0	46.7687	0.221708	0
1359	slka	3	2	0.986269	-3.62491	6.95e-54	15.4106	0.0728784	7.33e-53
1360	camk2g2	3	2	0.626018	-1.56277	1.54e-157	26.7158	0.126599	3.18e-156
1361	slc24a3	4	2	1.41014	1.05551	3.49e-117	22.9824	0.108478	5.77e-116
1362	hpse2	1	1	1.56505	4.16726	3.27e-97	20.8905	0.0985015	4.82e-96
1363	rin2	9	1	-0.124047	6.85729	1.42e-61	16.5156	0.0780029	1.6e-60
1364	vdac2	6	2	-3.8877	-4.40576	9.49e-70	17.6148	0.0833489	1.15e-68
1365	disc1	2	2	2.69499	-2.57233	8.63e-140	25.1421	0.11911	1.62e-138
1366	sorbs1	2	2	2.9459	-2.2859	0	50.1845	0.23809	0
1367	2022-03-08	2	2	1.99054	-0.339353	4.54e-81	19.0331	0.090102	6e-80
1368	syne2b	9	1	-0.798951	7.30692	2.21e-86	19.6635	0.0930624	3.04e-85
1369	slc4a11	1	1	1.46388	5.6194	0	43.651	0.20671	0
1370	khdrbs2	4	2	0.966814	1.72228	1.08e-271	35.1978	0.166062	3.58e-270
1371	six4a	5	2	1.97191	-3.52271	1.56e-53	15.3584	0.0726094	1.63e-52
1372	csmd1a	2	2	4.31015	-2.73687	1.34e-145	25.6678	0.121433	2.6e-144
1373	prkn	3	2	1.62354	-1.20288	4.96e-89	19.9706	0.0945045	6.94e-88
1374	kcnq5a	9	1	-0.721021	7.17846	0	59.5178	0.282405	0
1375	CU179758.1	2	2	3.19397	-3.44511	4.43e-64	16.8599	0.0793862	5.13e-63
1376	rsrp1	5	2	2.06715	-5.46967	0	38.4694	0.182419	0
1377	qkib	9	1	0.189227	5.90601	2.63e-172	27.9581	0.132453	5.84e-171
1378	prkg1a	3	2	1.9511	-2.25626	0	38.2152	0.181188	0
1379	eif4ebp2	6	2	-3.79877	-4.09128	2.51e-57	15.9146	0.0752071	2.72e-56
1380	rims1a	1	1	3.45314	5.16405	4.7e-75	18.293	0.0857527	5.95e-74
1381	rps24	10	3	-7.896	-3.94564	0	37.5349	0.177992	0
1382	pcdh15a	4	2	-0.149724	-0.506384	0	83.5837	0.396647	0
1383	ldb3a	1	1	0.425788	5.41217	1.43e-77	18.6063	0.0879908	1.84e-76
1384	si:dkeyp-86d6.2	4	2	-0.722414	-0.531643	1.43e-72	17.9788	0.0846439	1.77e-71
1385	cfl1l	12	4	-8.84272	3.3816	3.92e-246	33.4855	0.157693	1.15e-244
1386	CR356236.1	9	1	-0.542227	6.45257	3.06e-93	20.4491	0.096364	4.37e-92
1387	smap1	4	2	1.90513	-0.0525131	9e-171	27.8316	0.131904	1.99e-169
1388	lrrc73	7	2	-2.18872	-3.69063	0	53.9376	0.255877	0
1389	tjap1	3	2	1.30218	-0.968614	0	55.0996	0.261441	0
1390	psmb1	6	2	-4.31827	-4.26817	1.38e-85	19.5704	0.0925951	1.89e-84
1391	sertad4	8	1	-1.39018	7.7095	9.66e-94	20.5053	0.0965288	1.38e-92
1392	cst3	8	1	-2.37391	6.83371	8.31e-254	34.0086	0.160945	2.53e-252
1393	marcksl1a	8	1	-2.78471	6.65602	5.04e-55	15.5792	0.0734333	5.37e-54
1394	actn1	1	1	1.56957	4.32179	5.75e-57	15.8626	0.0749771	6.22e-56
1395	galnt2	2	2	3.01289	-0.94542	1.64e-116	22.9152	0.108524	2.69e-115
1396	si:dkey-51a16.9	4	2	-0.726597	-0.0544334	1.89e-177	28.378	0.134169	4.31e-176
1397	fgfr2	1	1	1.97141	6.01187	0	53.7536	0.254719	0
1398	loxl3b	1	1	1.66968	5.99426	3.8e-84	19.4008	0.091673	5.13e-83
1399	mcu	3	2	-0.0799215	-1.12524	1.73e-67	17.3176	0.0819353	2.07e-66
1400	micu1	3	2	0.449746	-1.30936	4.97e-77	18.5394	0.0877378	6.38e-76
1401	adgrb3	1	1	3.40267	5.1338	2.17e-94	20.5778	0.0972405	3.13e-93
1402	bag3	5	2	2.10673	-4.90123	0	55.537	0.263441	0
1403	sobpa	2	2	3.1023	-1.27244	5.33e-111	22.3556	0.105813	8.52e-110
1404	ttc7a	4	2	-0.402235	0.14486	0	47.6577	0.225722	0
1405	alms1	3	2	0.0632335	-2.31745	4.95e-69	17.521	0.0828972	5.99e-68
1406	jag1b	9	1	0.311273	6.3726	0	56.4182	0.267539	0
1407	calm2a	6	2	-3.62963	-4.09268	8.46e-145	25.596	0.121241	1.64e-143
1408	si:dkey-18j18.3	7	2	-2.29566	-3.05859	2.77e-169	27.7083	0.130895	6.06e-168
1409	zgc:193505	12	4	-8.89037	3.44326	5.54e-99	21.0843	0.0965775	8.23e-98
1410	epcam	8	1	-2.60322	6.41459	0	59.7213	0.283223	0
1411	bcl2l11	1	1	0.817553	5.23747	2.22e-70	17.6969	0.0836559	2.71e-69
1412	pdzd7a	3	2	0.202248	-1.07034	4.68e-301	37.0676	0.175739	1.74e-299
1413	arg2	5	2	1.91986	-5.45453	4.8e-189	29.3026	0.138877	1.15e-187
1414	meis1b	1	1	1.2615	4.7714	0	38.6195	0.183145	0
1415	col9a1b	1	1	1.9798	6.03821	2.33e-61	16.4855	0.0774736	2.63e-60
1416	rdh12	5	2	1.66491	-3.81716	6.91e-279	35.665	0.169009	2.36e-277
1417	ptpn20	4	2	0.906777	1.641	2.38e-269	35.0444	0.165163	7.77e-268
1418	cdh23	3	2	0.353951	-1.09347	0	47.6956	0.226253	0
1419	msx3	8	1	-1.62952	7.72581	6.44e-200	30.144	0.142097	1.6e-198
1420	cdkl1	5	2	2.58278	-3.31469	0	42.5363	0.201652	0
1421	unc5b	1	1	1.30479	5.44866	6.55e-248	33.6074	0.159078	1.93e-246
1422	akt3a	3	2	0.728685	-1.09638	0	51.2147	0.242986	0
1423	dld	11	2	-1.57577	-1.55969	0	73.0453	0.346137	0
1424	psme4a	5	2	1.80248	-4.79924	1.61e-69	17.5849	0.0830941	1.95e-68
1425	pdlim1	1	1	1.5058	6.05685	1.65e-186	29.1029	0.137267	3.89e-185
1426	cdhr1a	2	2	3.32256	-1.70083	0	61.3256	0.290782	0
1427	sh2d4ba	7	2	-1.85712	-4.13793	4.52e-163	27.1878	0.128801	9.57e-162
1428	sema4ga	4	2	1.19497	-0.146159	5.64e-106	21.833	0.103266	8.78e-105
1429	zgc:171482	4	2	-0.0181904	0.408216	0	38.9189	0.182989	0
1430	pax2a	2	2	3.02407	-2.76083	0	82.9494	0.393742	0
1431	sfrp5	1	1	1.36645	6.09253	4.02e-131	24.3366	0.114557	7.23e-130
1432	kcnma1a	2	2	1.90427	-0.997006	0	79.9648	0.379557	0
1433	pgam1a	7	2	-1.11966	-3.89636	8.44e-81	19.0005	0.0898997	1.11e-79
1434	bcl11aa	11	2	-1.17964	-1.16758	2.88e-65	17.0207	0.0804971	3.38e-64
1435	hk1	3	2	0.500462	-3.60898	5.96e-209	30.8256	0.146094	1.54e-207
1436	jag2a	11	2	-0.781438	-1.33249	5.68e-60	16.2914	0.076991	6.31e-59
1437	macrod2	2	2	2.06889	-0.326528	3.6e-135	24.716	0.117106	6.56e-134
1438	lyst	4	2	1.07902	-0.528856	0	49.7463	0.235941	0
1439	herc4	5	2	2.0146	-4.98334	4.05e-64	16.8653	0.0797285	4.69e-63
1440	fbln7	8	1	-1.6962	7.25116	4.77e-230	32.3616	0.152926	1.32e-228
1441	CU639469.1	9	1	-0.410554	7.3122	1.33e-72	17.9828	0.0850558	1.65e-71
1442	cox5b2	2	2	3.03263	-2.88348	1.53e-270	35.1225	0.166428	5.05e-269
1443	smoc2	9	1	-0.791082	6.26053	3.15e-64	16.8801	0.0792276	3.66e-63
1444	cdh23.1	3	2	0.521212	-1.90313	0	37.6362	0.178431	0
1445	SPATA48	3	2	0.655276	-1.35975	3.62e-197	29.9334	0.141856	8.93e-196
1446	fgfr3	1	1	1.72032	5.31569	1.55e-248	33.6502	0.159239	4.59e-247
1447	hacd3	7	2	-2.35979	-4.26737	2.21e-108	22.0849	0.104506	3.48e-107
1448	iqcg	7	2	-1.86796	-3.90782	5.19e-231	32.43	0.153649	1.44e-229
1449	hipk3b	5	2	1.96377	-4.9317	1.07e-142	25.4065	0.120378	2.05e-141
1450	gnao1a	1	1	3.3156	5.16546	5.17e-65	16.9865	0.0803444	6.04e-64
1451	eif3m	10	3	-7.98143	-3.31595	1.27e-67	17.3356	0.0819907	1.51e-66
1452	bcl2l10	7	2	-0.992898	-3.3417	1.84e-161	27.0514	0.128138	3.86e-160
1453	chrna3	4	2	1.71149	-0.166832	6.38e-132	24.412	0.114596	1.15e-130
1454	lysmd2	6	2	-2.98242	-4.22754	1.58e-59	16.2286	0.076755	1.75e-58
1455	mt2	7	2	-0.213318	-3.87854	4.59e-272	35.2221	0.166813	1.53e-270
1456	scg3	3	2	0.212863	-1.96093	0	43.1484	0.20465	0
1457	rpl4	10	3	-8.15201	-3.70011	3.56e-179	28.5175	0.135144	8.18e-178
1458	nectin1b	2	2	2.17167	-0.60953	8.36e-193	29.5962	0.140287	2.03e-191
1459	si:ch211-129p13.1	2	2	4.31207	-3.17502	1.59e-192	29.5745	0.139856	3.86e-191
1460	bhlhe41	5	2	1.40996	-4.58022	1.99e-149	26.0085	0.123141	3.94e-148
1461	abcc5	2	2	2.00774	-0.944884	3.02e-52	15.1649	0.0717164	3.15e-51
1462	pclob	3	2	-0.0838734	-2.3351	0	100.057	0.475008	0
1463	ctsd	7	2	0.245579	-4.17576	5.43e-58	16.0101	0.0757181	5.93e-57
1464	dmxl2	3	2	1.56485	-1.7947	1.28e-172	27.9838	0.132608	2.85e-171
1465	smad6b	1	1	0.836541	5.93961	5.23e-128	24.0406	0.113822	9.26e-127
1466	slc6a15	2	2	2.56369	-1.84943	0	54.8457	0.260185	0
1467	fosb	5	2	2.45975	-5.44632	0	50.4606	0.239404	0
1468	hydin	3	2	0.140524	-1.55491	2.85e-150	26.0829	0.123565	5.68e-149
1469	gse1	1	1	1.86683	4.91885	1.3e-276	35.518	0.168356	4.4e-275
1470	lrriq1	7	2	-1.99291	-3.88866	1.7e-96	20.8115	0.0984984	2.5e-95
1471	BX323575.1	2	2	3.65157	-3.54649	7.87e-62	16.5511	0.0780894	8.9e-61
1472	sema6dl	2	2	3.9411	-3.46073	0	49.5709	0.235075	0
1473	cdon	1	1	0.991335	5.81401	2.37e-116	22.8991	0.108405	3.88e-115
1474	eps8b	2	2	2.77977	-2.10768	0	43.6019	0.206765	0
1475	mgat4c	2	2	2.53287	-1.14498	8.34e-74	18.1357	0.0857027	1.04e-72
1476	kcng4a	4	2	-0.480267	0.489814	0	47.6736	0.225671	0
1477	si:ch211-196l7.4	5	2	1.63891	-5.64421	8.87e-83	19.2382	0.0910796	1.19e-81
1478	cox4i1	6	2	-2.58229	-4.89195	1.57e-257	34.2595	0.162437	4.85e-256
1479	skor1b	7	2	-2.09552	-2.81396	0	55.3215	0.261407	0
1480	mical3a.1	3	2	1.30033	-1.55915	2.52e-66	17.1628	0.0811278	2.97e-65
1481	aplp2	9	1	-0.198506	7.2107	7.41e-77	18.5179	0.0876461	9.5e-76
1482	sipa1l3	9	1	0.265612	6.36557	4.54e-68	17.3945	0.0823152	5.45e-67
1483	rxfp3.3a3	4	2	1.81471	0.0465296	5.34e-63	16.7122	0.0716633	6.11e-62
1484	si:ch211-13k12.2	1	1	0.924396	5.3887	1.14e-125	23.8162	0.11273	1.99e-124
1485	daw1	7	2	-2.50632	-3.92299	1.46e-168	27.6483	0.130946	3.18e-167
1486	sphkap	2	2	3.06012	-1.31941	2.59e-243	33.2912	0.157583	7.55e-242
1487	pkma	7	2	-0.63052	-3.7415	0	40.9615	0.194272	0
1488	yap1	1	1	1.26078	5.81295	1.24e-94	20.6049	0.0975179	1.79e-93
1489	cep126	4	2	0.581238	0.0911384	0	40.2241	0.190589	0
1490	plch1	2	2	2.12612	-0.400287	2.99e-151	26.169	0.124001	6.01e-150
1491	luzp2	2	2	3.38408	-1.17222	6.38e-87	19.7266	0.093296	8.79e-86
1492	sema4ba	1	1	0.792399	5.11003	8.08e-85	19.4802	0.0921982	1.1e-83
1493	shank3a	2	2	2.08347	-0.322289	0	38.8438	0.184213	0
1494	otogl	9	1	-0.903555	6.25099	0	62.8332	0.29792	0
1495	ptprq	3	2	1.77311	-1.48174	0	76.1984	0.361676	0
1496	relt	4	2	1.01657	-0.215279	4.58e-120	23.2689	0.110198	7.69e-119
1497	kcnab1a	4	2	0.818523	0.299664	0	45.5648	0.216051	0
1498	ENSDARG00000059707	3	2	1.13525	-2.11897	4.05e-64	16.8653	0.0797678	4.69e-63
1499	ripor1	1	1	1.4522	5.46947	1.09e-93	20.4993	0.0968481	1.56e-92
1500	cpt1b	7	2	-1.16805	-3.37254	1.08e-59	16.252	0.0759791	1.19e-58
1501	si:ch211-132b12.7	5	2	1.46547	-4.60336	0	42.7564	0.202766	0
1502	fam107b	11	2	-1.11638	-1.28994	1.37e-65	17.0644	0.0807304	1.61e-64
1503	cfap45	3	2	0.757475	-3.68954	2.56e-120	23.2938	0.110298	4.32e-119
1504	mlc1	8	1	-0.947068	7.88807	8.37e-60	16.2677	0.0756446	9.27e-59
1505	si:ch211-1e14.1	3	2	0.332406	-1.04536	8.74e-152	26.2159	0.124216	1.76e-150
1506	fkbp4	5	2	1.75386	-4.7058	3.4e-169	27.701	0.131234	7.43e-168
1507	btbd11b	3	2	0.996777	-1.04384	9.16e-153	26.3018	0.12462	1.86e-151
1508	itpkcb	1	1	0.770686	5.41828	8.5e-279	35.6591	0.168768	2.9e-277
1509	hipk2	1	1	1.21059	4.21371	4.43e-146	25.7107	0.12179	8.64e-145
1510	zfpm1	1	1	1.20329	5.0453	8.4e-61	16.4079	0.0775712	9.41e-60
1511	b4galnt3b	4	2	0.392929	0.241362	1.77e-79	18.84	0.0889233	2.32e-78
1512	vaspb	1	1	1.54581	5.48994	1.41e-58	16.0938	0.0759489	1.55e-57
1513	bcar1	1	1	0.811758	5.56558	4.77e-123	23.5616	0.111553	8.19e-122
1514	pllp	5	2	1.71701	-3.21836	1.79e-145	25.6565	0.121469	3.47e-144
1515	slc17a8	2	2	2.65385	-2.58316	0	115.66	0.54913	0
1516	tspan3a	7	2	-1.01277	-3.95383	1.01e-91	20.2777	0.0960021	1.43e-90
1517	kifc3	3	2	-0.0640567	-1.65986	1.23e-157	26.7244	0.126632	2.53e-156
1518	si:dkey-266m15.7	3	2	1.32598	-2.86113	3.44e-219	31.5803	0.149663	9.15e-218
1519	cftr	8	1	-0.868616	7.99038	3.04e-56	15.7577	0.0730551	3.27e-55
1520	ccnl1a	5	2	2.51887	-5.36809	0	37.6711	0.178632	0
1521	tp53i11b	9	1	-0.580008	7.30501	1.53e-111	22.4113	0.105926	2.45e-110
1522	rps3	10	3	-8.28353	-3.38189	3.34e-225	32.0153	0.151768	9.08e-224
1523	serpini1	9	1	-1.18112	6.27538	3.39e-54	15.4569	0.07288	3.58e-53
1524	gramd1bb	3	2	1.0446	-1.13089	0	40.7287	0.193157	0
1525	myo7aa	3	2	1.01354	-1.50198	0	46.6788	0.221424	0
1526	hgfb	3	2	2.03113	-2.23666	2.16e-72	17.9557	0.0844269	2.68e-71
1527	rpl35a	10	3	-7.96966	-3.72832	0	40.2224	0.190752	0
1528	mibp2	10	3	-7.86881	-3.16434	1.9e-166	27.472	0.130118	4.07e-165
1529	cox5ab	6	2	-3.44923	-4.85809	3.92e-71	17.7942	0.0841891	4.81e-70
1530	pak1	3	2	0.0956309	-2.0465	2.22e-57	15.9222	0.0753094	2.41e-56
1531	FP236822.2	3	2	1.42563	-2.02234	0	52.7298	0.250164	0
1532	CR925719.2	2	2	2.4664	-2.13512	0	44.9493	0.213163	0
1533	CU896647.1	4	2	0.845622	1.58449	5.6e-168	27.5998	0.124692	1.21e-166
1534	epas1a	9	1	-1.36674	6.42955	7.09e-86	19.6044	0.0919191	9.71e-85
1535	cpn1	11	2	-0.844507	-1.8226	2.01e-72	17.9598	0.0847729	2.49e-71
1536	ablim1b	1	1	1.8636	6.0295	8.72e-109	22.1268	0.104662	1.38e-107
1537	si:dkey-193p11.2	12	4	-8.81751	3.3584	0	37.9851	0.177324	0
1538	bmpr1ab	1	1	0.866432	5.63637	4.2e-162	27.1058	0.128247	8.87e-161
1539	si:ch211-216b21.2	11	2	-0.858973	-1.8113	0	74.0491	0.351372	0
1540	capgb	7	2	-2.45556	-3.74143	0	51.7253	0.245312	0
1541	arid5b	1	1	1.45551	3.66372	5.35e-119	23.1632	0.109724	8.94e-118
1542	bricd5	8	1	-2.36066	6.89668	0	46.6897	0.220788	0
1543	grid2ipb	3	2	0.417503	-0.965881	2.33e-240	33.0864	0.156817	6.67e-239
1544	jmjd1cb	1	1	1.40123	3.92254	1.69e-84	19.4423	0.0920507	2.3e-83
1545	zdhhc16b	3	2	0.264981	-3.00618	0	92.8531	0.440775	0
1546	hs3st3b1b	11	2	-1.18683	-1.64737	2.01e-165	27.3861	0.12972	4.29e-164
1547	snu13b	10	3	-7.74118	-3.07894	1.36e-79	18.8541	0.0888126	1.78e-78
1548	socs3b	10	3	-7.64144	-3.11373	2.01e-121	23.4025	0.110756	3.41e-120
1549	pmp22b	9	1	-1.22627	6.28601	3.44e-101	21.3234	0.100644	5.2e-100
1550	tekt3	4	2	0.799457	0.608031	0	54.3264	0.257336	0
1551	foxj1b	6	2	-4.51743	-3.75934	2.42e-63	16.7594	0.0789203	2.78e-62
1552	cyp26a1	11	2	-1.67291	-1.59061	1.43e-73	18.1058	0.0836045	1.79e-72
1553	fscn2b	3	2	-0.336154	-3.31829	0	40.7247	0.193113	0
1554	tbkbp1	2	2	4.12516	-3.35318	0	71.2548	0.337855	0
1555	afap1	1	1	2.13922	5.03278	1.55e-81	19.0894	0.0900695	2.05e-80
1556	lipf	5	2	2.41632	-3.43339	0	46.4701	0.220379	0
1557	si:ch211-277e21.1	3	2	0.589467	-0.992007	3.87e-223	31.8667	0.151044	1.04e-221
1558	ANKFN1	3	2	0.421122	-1.01124	0	47.9925	0.227672	0
1559	pax2b	11	2	-1.08099	-1.14391	2.36e-109	22.1857	0.105052	3.75e-108
1560	prr15lb	4	2	-1.01562	0.277419	1.77e-53	15.3501	0.0723471	1.86e-52
1561	rbfox3a	4	2	0.984384	0.326994	1.51e-194	29.7314	0.140879	3.68e-193
1562	rpl38	10	3	-7.59561	-3.65185	3.36e-210	30.9186	0.14656	8.7e-209
1563	qki2	9	1	0.140161	6.67275	1.76e-170	27.8075	0.131549	3.87e-169
1564	col1a1b	1	1	2.15164	6.60073	1.47e-274	35.3847	0.167091	4.93e-273
1565	slc16a3	5	2	2.19829	-4.17992	6.91e-176	28.2511	0.133806	1.57e-174
1566	papss2b	9	1	0.785253	6.10685	1.51e-99	21.1457	0.0999266	2.26e-98
1567	mpp7a	2	2	4.18627	-2.85887	2.9e-304	37.2662	0.176663	1.09e-302
1568	fasn	3	2	1.07286	-3.81479	5.8e-78	18.6545	0.0882966	7.51e-77
1569	bambia	8	1	-1.84746	7.60373	2.77e-103	21.5479	0.101646	4.24e-102
1570	kif19	5	2	2.78178	-3.40252	1.1e-248	33.6603	0.159565	3.28e-247
1571	adam11	4	2	1.00116	1.41106	0	93.2318	0.442242	0
1572	ndst2b	2	2	2.52114	-0.559645	9.82e-120	23.2361	0.110057	1.65e-118
1573	svila	2	2	2.39081	-2.43889	0	58.3633	0.276944	0
1574	camk2g1	2	2	2.0359	-0.279294	3.32e-67	17.2802	0.0817805	3.94e-66
1575	htra1b	3	2	2.1474	-2.70506	8.49e-63	16.6846	0.078847	9.71e-62
1576	znf646	2	2	2.91675	-2.81987	2.12e-164	27.3	0.129328	4.52e-163
1577	cd37	3	2	1.1977	-3.55878	0	38.624	0.183124	0
1578	pvalb9	4	2	-1.0233	-0.295865	0	97.815	0.464268	0
1579	kcnj2a	4	2	-1.19809	0.687925	1.31e-178	28.4719	0.133994	2.99e-177
1580	tcf7l2	1	1	1.62546	5.44806	3.82e-109	22.164	0.104891	6.06e-108
1581	CR847968.1	2	2	3.56186	-2.80858	0	52.8058	0.250443	0
1582	nrxn1a	1	1	3.39592	5.09837	0	37.7554	0.178573	0
1583	myo15b	5	2	2.56438	-3.15781	0	78.4526	0.372339	0
1584	tefa	7	2	-1.14967	-3.81544	2.26e-108	22.0839	0.104587	3.55e-107
1585	ca10a	1	1	2.42135	5.57426	1.84e-57	15.934	0.0750275	2e-56
1586	ccser2b	2	2	2.94346	-1.97859	7.44e-103	21.5021	0.101801	1.14e-101
1587	si:dkey-11c5.11	7	2	-0.760868	-3.74388	0	59.495	0.282226	0
1588	oat	5	2	1.70841	-4.44077	2.89e-86	19.6499	0.0929658	3.97e-85
1589	sh2d4bb	7	2	-1.71582	-3.98365	0	61.4124	0.291346	0
1590	nrg3b	2	2	1.95845	-0.871697	0	41.3277	0.195999	0
1591	zgc:92313	8	1	-2.18444	6.46662	1.94e-299	36.967	0.17492	7.16e-298
1592	grem2b	8	1	-2.23634	7.03814	2.24e-74	18.2078	0.0841423	2.81e-73
1593	arl4d	5	2	1.60309	-5.38663	8.97e-61	16.4039	0.0774777	1e-59
1594	ndufa4	7	2	-1.61821	-3.71393	6.04e-128	24.0347	0.113744	1.07e-126
1595	ebf3a.1	9	1	-0.818877	7.23893	0	42.3538	0.200789	0
1596	thrab	1	1	1.30495	4.11756	1.23e-59	16.2438	0.0768453	1.36e-58
1597	etv4	4	2	-1.0288	0.728503	1.68e-152	26.2787	0.124253	3.4e-151
1598	pcdh15b	2	2	1.71234	-0.978351	0	47.6969	0.226275	0
1599	ndufb8	6	2	-3.30539	-4.7659	2.34e-124	23.6889	0.112189	4.05e-123
1600	tectb	8	1	-1.97325	6.76215	0	118.634	0.562586	0
1601	gpam	5	2	1.944	-2.81986	1.92e-121	23.4045	0.110845	3.26e-120
1602	zfp36l2	8	1	-2.64184	6.71291	6.7e-83	19.2527	0.0907482	8.97e-82
1603	six2b	7	2	-1.17957	-3.38033	6.98e-69	17.5015	0.0825061	8.42e-68
1604	anxa11b	8	1	-2.38459	6.97696	5.6e-103	21.5153	0.101426	8.56e-102
1605	prkcea	2	2	2.89017	-1.26249	4.44e-262	34.5637	0.163866	1.41e-260
1606	mki67	1	1	2.44059	5.45357	2.15e-71	17.8279	0.083696	2.64e-70
1607	ccdc6b	5	2	1.75665	-3.74944	3.51e-99	21.1059	0.099877	5.23e-98
1608	TANC2	2	2	2.69192	-1.50671	6.62e-60	16.282	0.0769395	7.34e-59
1609	CABZ01069040.1	3	2	1.68878	-0.794493	4.55e-117	22.9709	0.10875	7.5e-116
1610	tbata	3	2	1.16858	-3.99655	1.93e-228	32.2471	0.152813	5.31e-227
1611	LO017650.1	5	2	2.60754	-3.28431	3.28e-123	23.5775	0.111512	5.63e-122
1612	dock1	1	1	1.46373	5.41528	3.56e-287	36.1957	0.171544	1.25e-285
1613	calm3a	7	2	-1.42245	-4.16196	0	89.7773	0.426167	0
1614	gpr142	2	2	2.8453	-2.97374	2.82e-59	16.1931	0.0765082	3.11e-58
1615	FADS6	8	1	-1.90079	7.47337	7.2e-54	15.4082	0.0727656	7.6e-53
1616	wbp2	7	2	-0.69323	-3.48131	1.18e-59	16.2468	0.0767869	1.3e-58
1617	CR936442.1	8	1	-1.25584	7.85836	4.79e-135	24.7045	0.116448	8.73e-134
1618	uqcrb	7	2	-0.830415	-4.42218	5.1e-69	17.5194	0.0828853	6.17e-68
1619	efna3a	4	2	1.04093	1.92044	1.98e-189	29.3328	0.138362	4.73e-188
1620	fabp3	10	3	-7.17387	-4.16458	4.61e-222	31.7889	0.150682	1.24e-220
1621	atp1a3a	1	1	3.43327	5.13039	1.86e-62	16.6376	0.0779253	2.12e-61
1622	elmo1	1	1	1.24945	5.40755	1.84e-157	26.7091	0.126422	3.8e-156
1623	rplp1	10	3	-7.92193	-4.03187	0	44.6431	0.21176	0
1624	epb41a	1	1	2.26041	5.66544	1.37e-128	24.0961	0.11402	2.44e-127
1625	jarid2b	1	1	1.5865	4.84478	7.69e-215	31.2619	0.14814	2.02e-213
1626	tpm3	1	1	0.745741	5.69888	2.05e-296	36.7783	0.174161	7.47e-295
1627	pvrl2l	1	1	1.30263	5.63838	8.28e-246	33.4632	0.158433	2.43e-244
1628	hey1	8	1	-2.02965	6.4483	0	60.602	0.287224	0
1629	poc1bl	4	2	1.08587	0.107801	3.52e-56	15.7484	0.0742832	3.78e-55
1630	csmd3a.1	4	2	0.979119	-0.271546	0	67.4837	0.319724	0
1631	anp32e	6	2	-3.46325	-4.16793	6.84e-84	19.3705	0.0916632	9.21e-83
1632	rps27.1	10	3	-7.63164	-3.74491	3.01e-228	32.2333	0.152806	8.27e-227
1633	slc2a3a	5	2	1.90716	-3.74026	0	47.8269	0.226814	0
1634	si:ch73-350k19.1	3	2	-0.574904	-2.47996	1.81e-61	16.5007	0.0777427	2.05e-60
1635	cers2a	9	1	-0.572635	5.78826	1.08e-58	16.1105	0.0761926	1.18e-57
1636	cdk6	4	2	1.09215	0.492962	3.82e-137	24.8989	0.117845	7.06e-136
1637	tspan13b	7	2	-0.356737	-4.1413	0	85.5769	0.406226	0
1638	agr2	8	1	-2.40388	6.94157	4.81e-155	26.5003	0.125488	9.84e-154
1639	sall3b	4	2	-1.03533	0.255882	2.26e-237	32.8781	0.15564	6.41e-236
1640	si:dkey-222b8.4	5	2	1.6725	-4.41707	2.37e-89	20.0074	0.0945157	3.32e-88
1641	oxr1b	3	2	0.977804	-0.783584	3.32e-192	29.5496	0.140021	8.02e-191
1642	nedd9	9	1	0.0440265	5.89453	0	46.1734	0.218924	0
1643	atp5if1a	6	2	-4.16834	-4.30551	7.19e-74	18.1438	0.085816	8.99e-73
1644	arhgef1a	9	1	0.311468	6.45045	2.22e-74	18.2082	0.0858907	2.79e-73
1645	celf3a	1	1	2.94053	5.35178	4.84e-58	16.0173	0.0756791	5.29e-57
1646	trps1	1	1	1.49965	5.30481	8.01e-127	23.9271	0.113271	1.41e-125
1647	atp9b	2	2	1.86392	-1.17639	2.45e-76	18.4534	0.0873242	3.13e-75
1648	si:dkey-240h12.3	9	1	-1.50599	6.49143	4.11e-239	32.9996	0.156102	1.17e-237
1649	matn1	6	2	-3.5408	-2.95773	2.95e-77	18.5675	0.0876827	3.79e-76
1650	vps50	1	1	1.99728	4.15383	3.42e-87	19.7581	0.0932909	4.73e-86
1651	vps50.1	3	2	1.38649	-1.52122	1.1e-53	15.3808	0.0726881	1.16e-52
1652	ctnnal1	9	1	0.412679	6.3292	1.36e-133	24.5688	0.116197	2.47e-132
1653	dbpa	5	2	1.3433	-4.39261	1.52e-62	16.6498	0.0787306	1.73e-61
1654	tpi1a	7	2	-1.72498	-3.97238	1.6e-88	19.9121	0.0941887	2.22e-87
1655	syt11a	2	2	3.50767	-2.76076	0	47.8062	0.226685	0
1656	csmd2	3	2	0.438956	-1.64205	2.93e-207	30.6991	0.145353	7.5e-206
1657	crabp2b	8	1	-2.37034	6.78584	3.57e-111	22.3735	0.10511	5.7e-110
1658	p3h4	1	1	1.36714	5.53418	1.82e-220	31.6731	0.14987	4.89e-219
1659	ptdss1b	2	2	2.6992	-2.66685	6.5e-56	15.7096	0.0741878	6.97e-55
1660	pleca	1	1	2.0197	6.12754	3.4e-143	25.4514	0.120522	6.55e-142
1661	fam126a	2	2	2.34896	-1.94208	2.73e-119	23.1921	0.109813	4.58e-118
1662	s100v2	12	4	-8.80855	3.34674	2.54e-94	20.5701	0.0964334	3.66e-93
1663	col1a2	1	1	2.17684	6.62724	1.84e-188	29.2568	0.138154	4.38e-187
1664	rps18	10	3	-8.24203	-3.30165	4.72e-210	30.9076	0.146505	1.22e-208
1665	rbm24a	3	2	1.13809	-3.08917	0	126.252	0.599426	0
1666	mcl1a	5	2	1.74275	-5.63152	2.07e-185	29.016	0.137526	4.87e-184
1667	stx1b	1	1	3.33975	5.19161	1.16e-130	24.2932	0.114441	2.07e-129
1668	phactr4a	5	2	2.24271	-4.93548	6.2e-98	20.9697	0.0992997	9.18e-97
1669	hpcal4	5	2	2.09588	-2.82555	1.71e-120	23.3111	0.110205	2.89e-119
1670	hpca	5	2	1.87149	-3.10396	0	39.3026	0.186376	0
1671	thbs3b	4	2	0.939463	1.65698	0	49.5916	0.233349	0
1672	thsd7aa	2	2	3.22367	-2.86864	8.46e-212	31.0373	0.147078	2.21e-210
1673	grinaa	5	2	1.95461	-4.89623	1.19e-294	36.6679	0.173775	4.28e-293
1674	myclb	5	2	2.14495	-5.80194	1.96e-58	16.0734	0.0759769	2.15e-57
1675	nxph1	1	1	2.94073	5.2158	1.53e-60	16.3713	0.0743967	1.71e-59
1676	adcy2b	9	1	-0.809053	7.41977	0	38.8384	0.183601	0
1677	rpl30	10	3	-7.72159	-3.63574	8.37e-207	30.6649	0.145352	2.14e-205
1678	laptm4b	3	2	0.999883	-3.78051	0	102.879	0.488422	0
1679	akap9	3	2	0.668876	-3.05802	1.33e-102	21.4752	0.101694	2.02e-101
1680	cd164l2	3	2	0.931445	-3.52103	0	66.8167	0.317097	0
1681	lin28a	5	2	2.67578	-4.52789	0	39.8999	0.18882	0
1682	ppp1r9a	2	2	2.19349	-1.44329	3.32e-242	33.2146	0.157422	9.6e-241
1683	si:ch211-80h18.1	1	1	1.13882	6.02145	0	48.726	0.230764	0
1684	srd5a1	3	2	0.07141	-1.1196	1.74e-121	23.4089	0.110817	2.95e-120
1685	s100s	4	2	-0.808526	-0.176815	0	116.446	0.55273	0
1686	zgc:194578	7	2	-0.62448	-3.62071	1.91e-85	19.554	0.0925353	2.6e-84
1687	si:ch211-195b13.1	5	2	2.05677	-5.463	1.53e-133	24.5641	0.116379	2.77e-132
1688	col9a2	8	1	-2.00993	6.97062	1.42e-194	29.7334	0.14079	3.48e-193
1689	hcn3	4	2	-1.12947	0.656799	1.83e-98	21.0277	0.0988843	2.72e-97
1690	krt17	12	4	-8.82142	3.29764	1.75e-81	19.0829	0.0895281	2.32e-80
1691	sdc2	1	1	1.00251	5.84133	7.22e-85	19.486	0.0921645	9.82e-84
1692	macf1a	2	2	2.03182	-0.425615	8.58e-271	35.1389	0.166613	2.84e-269
1693	cgnb	3	2	-0.210181	-1.41044	3.28e-135	24.7198	0.11709	5.98e-134
1694	sem1	6	2	-3.50337	-4.77735	1.18e-62	16.6649	0.0788356	1.35e-61
1695	ube2ql1	2	2	2.5326	-1.88922	6.15e-83	19.2571	0.0911169	8.24e-82
1696	krt91	12	4	-8.75037	3.27932	0	53.7902	0.254492	0
1697	rpl14	10	3	-7.79664	-4.10646	0	40.2475	0.190886	0
1698	eif1	10	3	-7.29842	-3.67531	6.95e-58	15.9948	0.0756689	7.59e-57
1699	stm	8	1	-2.0367	6.68098	0	114.304	0.54251	0
1700	azin1b	3	2	0.726588	-3.95791	2.33e-63	16.7616	0.0792885	2.68e-62
1701	si:ch211-133n4.6	8	1	-2.33425	6.74419	0	85.4657	0.405038	0
1702	ndufs6	6	2	-2.74616	-4.94596	7.18e-71	17.7602	0.084028	8.8e-70
1703	ptprua	1	1	2.70038	5.43423	2.22e-168	27.6333	0.130755	4.82e-167
1704	scg5.1	3	2	0.909273	-1.94348	3.67e-64	16.8711	0.0796784	4.26e-63
1705	pdk2b	2	2	4.27217	-3.51082	4.98e-160	26.9293	0.127322	1.04e-158
1706	adgrb2	4	2	1.03351	1.60949	6.65e-136	24.7841	0.116899	1.22e-134
1707	col11a2	1	1	1.86048	6.1873	1.49e-54	15.5098	0.073055	1.58e-53
1708	tekt2	3	2	0.949666	-3.8688	2.6e-71	17.8173	0.0842675	3.19e-70
1709	MANEAL	3	2	-0.313444	-3.23943	1.58e-122	23.511	0.111301	2.69e-121
1710	ago3b	5	2	2.61549	-5.36746	2.29e-147	25.8256	0.122208	4.5e-146
1711	gabbr1b	1	1	3.39001	4.93819	1.56e-55	15.6539	0.0738848	1.67e-54
1712	ldlrad4a	2	2	2.58416	-0.568573	1.23e-85	19.5762	0.0926792	1.69e-84
1713	marcksl1b	10	3	-7.66902	-3.04477	0	39.9389	0.189221	0
1714	rpl15	10	3	-8.26023	-3.25494	1.71e-234	32.6761	0.154901	4.81e-233
1715	grb10a	2	2	3.84072	-3.45465	4.47e-87	19.7445	0.0934134	6.17e-86
1716	znf516	1	1	1.66458	4.31697	5.95e-59	16.1472	0.0762918	6.55e-58
1717	rims2b	4	2	0.929846	0.0109783	6.76e-118	23.0536	0.109151	1.12e-116
1718	trib1	3	2	1.06399	-3.71638	2.2e-76	18.4592	0.0873021	2.82e-75
1719	C19H5orf49	7	2	-1.51544	-4.32831	1.44e-55	15.6591	0.0739999	1.54e-54
1720	nme2b.1	10	3	-7.7314	-3.47728	1.08e-154	26.4697	0.125417	2.21e-153
1721	spaca4l	12	4	-8.90817	3.45664	3.03e-76	18.4418	0.0857977	3.88e-75
1722	spag1a	5	2	1.96466	-3.47786	6.88e-167	27.5089	0.13032	1.48e-165
1723	ext1b	9	1	0.236721	6.15568	4.33e-171	27.8578	0.131915	9.59e-170
1724	eef1a1l1	10	3	-7.74325	-3.51477	0	44.2252	0.20977	0
1725	nfyc	4	2	-0.141716	0.220007	7.98e-69	17.4938	0.0827665	9.63e-68
1726	rpl11	10	3	-8.14224	-3.39703	3.35e-290	36.3875	0.172533	1.18e-288
1727	cfap20	5	2	1.62986	-4.93783	2.66e-85	19.537	0.0924519	3.63e-84
1728	bcas3	2	2	2.30854	-0.379578	2.32e-87	19.7777	0.0936457	3.2e-86
1729	zgc:101731	6	2	-4.63646	-3.70841	1.32e-136	24.8492	0.115976	2.43e-135
1730	arhgap35a	1	1	1.6294	5.14531	1.03e-89	20.0488	0.0948956	1.45e-88
1731	si:dkey-1m11.6	9	1	-0.808338	6.98162	1.67e-166	27.4767	0.130133	3.59e-165
1732	arhgap32a	9	1	-0.0849091	6.7691	0	47.7464	0.226375	0
1733	si:dkey-103g5.4	3	2	1.80072	-2.00407	0	63.6229	0.301913	0
1734	nxn	1	1	1.17937	5.33377	8.09e-253	33.9417	0.160778	2.46e-251
1735	igsf9ba	5	2	2.53289	-3.27456	2.88e-162	27.1198	0.12845	6.08e-161
1736	wdr95	3	2	1.98718	-2.32711	0	62.6441	0.297258	0
1737	usp2a	5	2	1.62738	-4.67324	6.55e-300	36.9964	0.175437	2.42e-298
1738	hsph1	5	2	1.97202	-5.00683	0	47.0198	0.222968	0
1739	si:ch211-235m3.10	7	2	-2.07246	-2.86445	0	65.3573	0.309973	0
1740	cldna	12	4	-8.79591	3.33896	1.3e-71	17.8561	0.0839259	1.6e-70
1741	chchd2	5	2	1.28543	-5.32849	5.62e-153	26.3203	0.124683	1.14e-151
1742	si:ch211-286b4.4	3	2	1.29248	-1.10632	0	80.673	0.38292	0
1743	galnt17	2	2	3.53829	-3.54514	1.86e-170	27.8056	0.131517	4.09e-169
1744	gdpd5b	4	2	1.72753	-0.0782016	0	39.2933	0.186277	0
1745	mlf1	5	2	1.97044	-4.95049	0	53.7387	0.254904	0
1746	numbl	1	1	1.55596	4.8223	1.66e-94	20.5908	0.0973811	2.39e-93
1747	foxo1a	2	2	3.02401	-3.28433	7.95e-240	33.0493	0.15666	2.27e-238
1748	frya	5	2	2.51176	-3.2202	0	65.9175	0.31283	0
1749	schip1	1	1	1.27936	5.6112	2.74e-61	16.4757	0.0778206	3.09e-60
1750	zgc:77784	2	2	2.35892	-1.59104	0	45.8136	0.217196	0
1751	ece2b	9	1	0.233791	6.1794	3.01e-78	18.6895	0.0884035	3.91e-77
1752	si:dkey-4p15.5	1	1	2.46125	5.22191	5.94e-103	21.5125	0.0934509	9.07e-102
1753	gab2	1	1	1.61774	5.20223	5e-69	17.5204	0.0826923	6.05e-68
1754	msi2b	1	1	1.12624	4.15376	8.13e-180	28.5691	0.135406	1.87e-178
1755	tenm4	1	1	0.692101	5.55853	0	40.6042	0.192537	0
1756	dscamb	3	2	-0.39295	-1.17554	3.25e-288	36.2617	0.171918	1.14e-286
1757	abcg4b	8	1	-1.20815	7.71313	2.85e-270	35.1047	0.165699	9.36e-269
1758	myo1cb	9	1	0.194286	6.60289	2.21e-64	16.9011	0.0796839	2.57e-63
1759	zpld1b	8	1	-0.923798	7.96209	0	55.4873	0.260645	0
1760	postnb	1	1	2.17205	6.61588	4.3e-67	17.2652	0.0807022	5.1e-66
1761	CR450848.1	3	2	0.675721	-2.44796	2.8e-68	17.4223	0.0811836	3.36e-67
1762	ankrd13b	4	2	0.828678	1.58584	1.58e-55	15.6533	0.0731154	1.69e-54
1763	MARK4	1	1	1.06522	4.52844	7.09e-82	19.1301	0.0905525	9.42e-81
1764	prkd2	2	2	3.18811	-2.92785	0	39.049	0.185182	0
1765	cltcb	3	2	-0.471037	-3.48088	1.25e-157	26.7238	0.126636	2.57e-156
1766	proca1	8	1	-2.02462	6.80745	5.44e-87	19.7346	0.0926383	7.51e-86
1767	ksr1b	3	2	1.03916	-1.22487	1.72e-57	15.9381	0.0753629	1.88e-56
1768	nova2	1	1	2.07323	4.94771	8.28e-261	34.479	0.163433	2.61e-259
1769	cbln20	8	1	-1.27289	7.81856	0	53.9707	0.253997	0
1770	dscaml1	3	2	0.407336	-0.928935	0	51.3522	0.243636	0
1771	wsb1	7	2	0.0670679	-3.93958	2.21e-142	25.378	0.12016	4.22e-141
1772	zgc:171927	7	2	-1.6455	-4.27328	8.02e-156	26.5677	0.125862	1.64e-154
1773	eml2	3	2	0.840556	-3.63751	2.57e-301	37.0837	0.175827	9.6e-300
1774	gipr	4	2	-1.14276	0.764255	6.41e-106	21.8271	0.102367	9.98e-105
1775	myo18ab	2	2	2.20398	-0.504556	1.03e-95	20.725	0.0981454	1.5e-94
1776	si:ch211-137a8.2	9	1	0.128184	6.61836	2.79e-150	26.0837	0.123336	5.56e-149
1777	si:dkey-30e9.7	8	1	-0.942123	7.88948	6e-74	18.1538	0.0855732	7.5e-73
1778	zgc:172282	2	2	4.46503	-2.64181	3.56e-112	22.476	0.105979	5.73e-111
1779	sez6b	2	2	4.51901	-2.56514	9.48e-121	23.3363	0.110258	1.6e-119
1780	ccdc105	2	2	2.70041	-1.65523	0	63.2122	0.299806	0
1781	dlc	11	2	-1.63936	-1.59422	6.87e-258	34.2837	0.161827	2.12e-256
1782	dusp14	9	1	-0.0544665	6.46767	3.27e-84	19.4085	0.0917722	4.42e-83
1783	sgsm2	4	2	0.668054	0.46827	1.94e-63	16.7726	0.0789414	2.23e-62
1784	agfg1a	5	2	2.07627	-2.85892	9.61e-58	15.9746	0.0755578	1.05e-56
1785	synrg	4	2	0.951075	-0.542284	6.44e-185	28.9769	0.137337	1.51e-183
1786	robo1	1	1	1.48214	4.69762	0	54.915	0.260524	0
1787	rps5	10	3	-8.17383	-3.61645	0	41.5503	0.197058	0
1788	sik2b	5	2	2.00514	-4.9343	7.74e-125	23.7356	0.11244	1.34e-123
1789	tnfrsf19	9	1	0.0268715	6.67983	0	41.5742	0.196974	0
1790	efhd1	8	1	-2.11166	7.0682	0	51.7766	0.245276	0
1791	gal3st2	9	1	-1.04132	7.07055	3.42e-96	20.778	0.0982073	5e-95
1792	fat3a	1	1	0.96769	5.38993	1.38e-204	30.4981	0.144501	3.51e-203
1793	mtnr1ba	11	2	-1.08026	-1.69918	4.51e-92	20.3174	0.0957593	6.4e-91
1794	usp16.1	2	2	4.16207	-2.90655	1.57e-56	15.7995	0.0743371	1.69e-55
1795	ncam1b	2	2	2.9045	-0.855226	0	70.3323	0.333808	0
1796	kirrel3l	1	1	2.27301	5.60918	2.25e-75	18.3333	0.0864544	2.85e-74
1797	aplp1	2	2	3.38378	-2.56504	0	88.4263	0.419734	0
1798	slc8a2b	3	2	-0.504772	-1.25557	4.81e-214	31.2033	0.147832	1.26e-212
1799	chordc1a	5	2	1.9742	-4.98638	2.37e-65	17.0322	0.0805488	2.78e-64
1800	gria4a	2	2	2.99219	-1.27396	4.32e-197	29.9275	0.141786	1.07e-195
1801	ENSDARG00000115101	9	1	-1.19913	6.38422	4.4e-74	18.1707	0.0855884	5.52e-73
1802	igsf11	9	1	0.315614	6.09861	7.39e-105	21.7151	0.102796	1.14e-103
1803	stoml3a	3	2	-0.530122	-2.36184	2.38e-84	19.4249	0.0916205	3.22e-83
1804	zgc:162730	8	1	-2.89521	6.49649	2.03e-58	16.0713	0.0758702	2.22e-57
1805	tgfb1a	9	1	0.719699	6.04187	1.53e-74	18.2285	0.086009	1.93e-73
1806	mindy4b	4	2	0.746222	0.922115	0	39.8614	0.188888	0
1807	PCP4	4	2	1.11245	1.08147	0	48.2039	0.228337	0
1808	CABZ01061591.1	9	1	0.241923	6.52041	9.96e-208	30.7341	0.1455	2.55e-206
1809	spa17	7	2	-0.576448	-3.49173	3.26e-128	24.0603	0.113936	5.77e-127
1810	DYNC2H1	3	2	0.719168	-1.11545	4.31e-52	15.1415	0.0716009	4.49e-51
1811	robo2.1	2	2	2.70164	-1.87793	1.81e-118	23.1107	0.109225	3e-117
1812	CR848683.2	1	1	2.16477	6.42205	1.75e-60	16.3633	0.0768412	1.95e-59
1813	scn8aa	2	2	1.93166	-0.939224	1.81e-124	23.6999	0.11223	3.13e-123
1814	fmnl3	9	1	0.257	6.50747	2.14e-105	21.7718	0.10292	3.33e-104
1815	her9	8	1	-2.60183	6.52015	0	40.2167	0.190356	0
1816	si:ch73-106g13.1	2	2	3.47107	-2.25858	6.97e-181	28.6549	0.135592	1.62e-179
1817	her4.1	8	1	-2.31105	6.46069	0	46.0162	0.217818	0
1818	her4.4	8	1	-2.35009	6.44072	8.96e-101	21.2786	0.100128	1.35e-99
1819	her4.2	8	1	-1.84283	6.37401	3.86e-265	34.7668	0.16439	1.24e-263
1820	agrn	2	2	2.75678	-0.66304	0	48.6173	0.230622	0
1821	her4.2.1	9	1	-1.1997	6.42186	4.02e-113	22.5727	0.105921	6.49e-112
1822	cntn3a.2	2	2	4.33208	-2.94549	1.14e-273	35.3268	0.167227	3.81e-272
1823	l1cama	1	1	3.28237	5.13714	4.78e-54	15.4347	0.0723938	5.05e-53
1824	si:ch73-217b7.1	2	2	2.34274	-1.63253	1.06e-131	24.3911	0.115527	1.91e-130
1825	ribc1	6	2	-2.89408	-3.45992	4.86e-100	21.1992	0.100209	7.27e-99
1826	atp6ap1a	3	2	0.0984339	-3.51956	1.28e-129	24.1942	0.114577	2.28e-128
1827	smc1a	7	2	-2.1443	-2.89413	0	40.2807	0.189327	0
1828	plagl2	1	1	1.53545	5.0114	6.94e-83	19.2509	0.0910238	9.28e-82
1829	myt1b	1	1	1.79572	4.86655	1.43e-159	26.8902	0.127008	2.97e-158
1830	usp19	5	2	1.59627	-4.44265	1.58e-139	25.118	0.118987	2.98e-138
1831	cd63	8	1	-1.9495	7.18007	5.05e-183	28.8261	0.136379	1.18e-181
1832	elovl4b	3	2	-0.173344	-3.27524	4.71e-195	29.7705	0.141065	1.15e-193
1833	ngfa	3	2	2.10837	-2.62408	1.37e-109	22.2101	0.105144	2.18e-108
1834	arhgef10lb	11	2	-1.32803	-1.34238	2.44e-163	27.2105	0.128816	5.16e-162
1835	col9a3	8	1	-2.03502	6.97795	1.58e-121	23.413	0.110684	2.68e-120
1836	rps21	10	3	-7.79809	-3.56442	5.77e-258	34.2888	0.162565	1.79e-256
1837	casz1	3	2	1.73366	-1.88229	0	41.739	0.197948	0
1838	dhrs3a	2	2	3.71298	-3.66507	5.18e-173	28.016	0.132404	1.16e-171
1839	CHST13	9	1	-0.103458	5.66725	2.94e-62	16.6103	0.0784807	3.34e-61
1840	si:ch211-197l9.5	3	2	1.45365	-0.594535	3.72e-100	21.2117	0.100327	5.58e-99
1841	BX294434.1	2	2	2.8705	-2.67567	0	55.8081	0.264754	0
1842	pfn1	12	4	-8.84251	3.38997	7.96e-100	21.1759	0.0996099	1.19e-98
1843	pkig	3	2	1.16083	-2.9669	0	61.0069	0.289502	0
1844	soga1	3	2	1.78479	-1.5938	2.24e-56	15.7771	0.0746375	2.41e-55
1845	rps26	10	3	-7.97004	-3.46111	1.32e-267	34.9297	0.1656	4.26e-266
1846	osbpl2b	2	2	2.90498	-2.89373	0	80.4491	0.381823	0
1847	sst6	3	2	0.272079	-2.0532	0	51.3696	0.243434	0
1848	cpne9	1	1	2.10587	3.3231	3.63e-142	25.3584	0.118466	6.92e-141
1849	lama5	1	1	1.34745	5.81265	5.32e-56	15.7223	0.0743165	5.71e-55
1850	hmga1a	6	2	-4.71304	-4.109	1.44e-60	16.3749	0.0774468	1.61e-59
1851	ndrg3b	3	2	2.18633	-2.33115	0	80.958	0.384276	0
1852	gdi1	7	2	-1.6996	-3.69725	7.3e-96	20.7416	0.0981677	1.06e-94
1853	rps12	10	3	-8.11685	-3.36454	5.74e-305	37.3096	0.176911	2.16e-303
1854	bmp7b	9	1	0.193059	6.58139	9.61e-136	24.7693	0.117155	1.76e-134
1855	b4galt5	5	2	2.60851	-5.26221	2.74e-139	25.0961	0.118861	5.14e-138
1856	si:ch211-66i15.4	7	2	-2.45788	-4.09505	6.88e-62	16.5591	0.0782458	7.79e-61
1857	ppdpfb	10	3	-7.84056	-3.05885	3.82e-52	15.1494	0.0715776	3.98e-51
1858	rpl10	10	3	-7.93224	-3.60041	1.71e-261	34.5246	0.163684	5.41e-260
1859	MAGI3	3	2	1.05758	-1.96964	0	41.1709	0.195259	0
1860	tuba1c	10	3	-7.72925	-4.03416	2.9e-60	16.3324	0.0771283	3.23e-59
1861	znf385a	2	2	2.13715	-0.513558	2.04e-270	35.1142	0.166494	6.72e-269
1862	eya4	4	2	0.0932574	-0.227901	8.32e-170	27.7516	0.131522	1.82e-168
1863	si:ch211-117c9.5	3	2	0.599173	-3.76078	0	43.7791	0.207598	0
1864	clstn1	9	1	0.12398	6.5537	5.08e-170	27.7694	0.131597	1.12e-168
1865	tuba1a	6	2	-3.5615	-4.0762	0	67.5402	0.320432	0
1866	si:dkey-205h13.1	5	2	1.58464	-4.1496	0	100.386	0.476575	0
1867	plxna2	1	1	1.77703	4.29289	9.5e-87	19.7064	0.0932533	1.31e-85
1868	sulf2b	4	2	1.05276	1.3687	2.45e-137	24.9167	0.11781	4.54e-136
1869	si:dkey-205h13.2	1	1	2.33889	5.20785	9.86e-175	28.1569	0.129912	2.22e-173
1870	rap1gap	5	2	2.56354	-3.28697	3.28e-184	28.9207	0.136831	7.71e-183
1871	ccdc30	11	2	-1.11577	-1.56305	1.48e-102	21.4703	0.101615	2.25e-101
1872	krt5	6	2	-3.88909	-4.61898	1.5e-215	31.3142	0.148414	3.95e-214
1873	samd10b	4	2	1.08399	1.29061	0	51.16	0.242489	0
1874	krt8	12	4	-8.80206	3.34176	1.55e-176	28.3039	0.133927	3.51e-175
1875	hspg2	1	1	1.37139	5.91147	8.21e-80	18.8807	0.089224	1.08e-78
1876	CR388207.1	4	2	0.0252675	0.384604	6.93e-92	20.2963	0.095275	9.82e-91
1877	naca	10	3	-8.14007	-3.60078	1.73e-171	27.8908	0.132171	3.83e-170
1878	kcnab2b	11	2	-1.10135	-1.59093	1.28e-142	25.3995	0.119938	2.45e-141
1879	zgc:153867	2	2	2.62638	-2.31113	0	53.7582	0.255001	0
1880	slc25a33	5	2	1.89376	-4.7834	3.92e-92	20.3243	0.0961933	5.56e-91
1881	zgc:158263	4	2	-0.732137	-0.0138096	0	62.076	0.294372	0
1882	ca6	9	1	-1.38129	6.26511	0	41.6465	0.195714	0
1883	galnt6	4	2	-1.14053	0.679465	3.42e-137	24.9033	0.117462	6.33e-136
1884	tns2a	2	2	3.72634	-3.37124	5.58e-197	29.9189	0.141796	1.38e-195
1885	zbtb46	4	2	0.953105	1.6751	3.01e-77	18.5662	0.0877754	3.87e-76
1886	itga5	1	1	1.21453	5.07876	7e-155	26.4861	0.125183	1.43e-153
1887	eno1a	7	2	-1.50655	-3.96636	0	46.9038	0.222501	0
1888	cacnb3b	2	2	2.76939	-2.60242	0	93.564	0.444139	0
1889	ptges3a	7	2	-1.22083	-4.58629	1.3e-67	17.3343	0.0819978	1.55e-66
1890	si:dkey-151g10.6	3	2	0.105431	-2.15315	0	53.4879	0.25377	0
1891	camta1a	2	2	3.31665	-2.48582	1.61e-298	36.9098	0.174978	5.88e-297
1892	IQSEC1	4	2	1.14561	-0.380964	0	44.2492	0.209843	0
1893	epha2b	1	1	0.425887	5.68686	1.63e-105	21.7844	0.1029	2.53e-104
1894	lima1a	1	1	1.48398	5.88097	3.84e-86	19.6355	0.0926897	5.27e-85
1895	tcp1	6	2	-4.41306	-4.17647	2.99e-69	17.5497	0.0830003	3.62e-68
1896	gpsm2l	3	2	1.65915	-1.79289	1.41e-165	27.399	0.12983	3.02e-164
1897	reps2	3	2	-0.310249	-1.44176	3.07e-62	16.6077	0.0779331	3.49e-61
1898	CU693481.1	3	2	0.338207	-1.99242	6.98e-126	23.8366	0.112463	1.22e-124
1899	zmp:0000001088	4	2	-0.0911344	0.30172	9.19e-275	35.3979	0.167169	3.09e-273
1900	fam131c	2	2	3.47679	-3.65752	4.45e-100	21.2034	0.100073	6.65e-99
1901	tshz2	1	1	0.84439	5.48015	2.78e-120	23.2902	0.110298	4.69e-119
1902	ARHGEF25	2	2	3.07538	-2.20443	2.41e-229	32.3115	0.153157	6.64e-228
1903	plxna1a	1	1	1.21178	4.32099	1.76e-118	23.1119	0.109463	2.92e-117
1904	fstl4	9	1	-0.218291	7.36588	1.35e-116	22.9236	0.108411	2.22e-115
1905	vdac1	6	2	-3.54032	-4.83565	2.33e-57	15.9193	0.0752947	2.53e-56
1906	onecut2	1	1	2.99808	5.41582	6.75e-141	25.2431	0.118752	1.27e-139
1907	sfswap	2	2	2.23085	-0.456582	1.61e-67	17.3218	0.0819767	1.92e-66
1908	efemp2b	2	2	2.45227	-2.64578	8.7e-100	21.1718	0.100209	1.3e-98
1909	skp1	6	2	-3.11637	-4.28407	1.07e-69	17.6079	0.0833192	1.3e-68
1910	col5a1	1	1	1.95956	6.39358	0	53.8673	0.255362	0
1911	nrxn2a	1	1	3.41166	5.10463	1.33e-273	35.3224	0.167248	4.45e-272
1912	bicdl2l	8	1	-1.85268	6.52508	3e-149	25.9926	0.121818	5.94e-148
1913	TENM2.1	4	2	1.48929	-0.0436701	4.26e-79	18.7936	0.0884963	5.56e-78
1914	cox8a	6	2	-2.59222	-4.9306	4.04e-209	30.8382	0.146183	1.04e-207
1915	cldnb	8	1	-2.55556	6.37749	0	63.7964	0.302366	0
1916	zgc:112437	8	1	-1.68076	7.3989	0	49.4517	0.233997	0
1917	myo5b	9	1	-0.0216641	5.92382	7.19e-61	16.4173	0.0776578	8.08e-60
1918	nrg2a	2	2	2.4079	-1.52737	3.98e-214	31.2094	0.147888	1.04e-212
1919	zgc:100829	1	1	1.13632	5.79988	3.23e-68	17.4139	0.0821775	3.89e-67
1920	ppp3ca	2	2	4.40032	-2.59045	0	43.8365	0.207668	0
1921	chchd10	6	2	-2.43232	-4.67253	1.11e-151	26.2068	0.124119	2.24e-150
1922	f2rl1.2	9	1	-1.24478	6.30634	3.5e-87	19.757	0.0929388	4.83e-86
1923	rpl23a	10	3	-7.99524	-3.23745	4.45e-259	34.3634	0.162912	1.39e-257
1924	notch1a	1	1	1.56252	5.18351	2.16e-280	35.7619	0.169288	7.44e-279
1925	celf4	2	2	2.91136	-0.518675	0	38.5934	0.182905	0
1926	rpl17	10	3	-7.895	-3.98928	9.48e-293	36.5483	0.173305	3.4e-291
1927	myorg	4	2	0.768928	1.60362	7.64e-172	27.9199	0.132064	1.7e-170
1928	fam219aa	5	2	2.43589	-4.80386	3.62e-88	19.8712	0.0940237	5.02e-87
1929	grin1a	4	2	1.00783	1.22853	1.93e-306	37.4004	0.17719	7.31e-305
1930	scamp1	3	2	1.31759	-2.47599	5.72e-101	21.2996	0.10085	8.63e-100
1931	nsa2	10	3	-7.86397	-3.07111	5.25e-58	16.0122	0.0756997	5.74e-57
1932	ebf1b	1	1	1.87771	4.91739	2.23e-71	17.8258	0.0842149	2.74e-70
1933	btc	3	2	0.794364	-3.69365	0	50.7778	0.240888	0
1934	esrra	5	2	2.50425	-4.34802	2.68e-203	30.4008	0.14403	6.79e-202
1935	atp5fa1	6	2	-3.25327	-4.48892	2.11e-100	21.2385	0.100578	3.16e-99
1936	psmb7	6	2	-4.28564	-4.25441	2.04e-64	16.9057	0.0799678	2.38e-63
1937	sptan1	3	2	1.42547	-2.65931	0	37.9938	0.180174	0
1938	fgf10a	2	2	3.10268	-2.71348	3.97e-252	33.8948	0.160681	1.2e-250
1939	rpl37.1	3	2	0.0718997	-2.13575	0	49.5578	0.235091	0
1940	tnfrsfa	1	1	0.489841	5.68741	0	51.3919	0.243646	0
1941	gng3	12	4	-8.79727	3.33468	1.83e-105	21.7792	0.101832	2.84e-104
1942	dacha	1	1	1.46685	4.35908	0	45.5989	0.216304	0
1943	pcxa	9	1	0.00820342	5.86456	3.13e-145	25.6347	0.121459	6.07e-144
1944	zgc:113162	4	2	0.873538	-0.122897	0	59.7671	0.283553	0
1945	atp2a2b	3	2	-0.198455	-1.44217	6.59e-121	23.3519	0.110605	1.11e-119
1946	crb2a	1	1	2.69492	5.46826	4.34e-65	16.9967	0.0790033	5.08e-64
1947	loxhd1a	4	2	0.0354699	0.274276	0	85.8516	0.407397	0
1948	zbtb16a	1	1	1.50474	5.09047	4.89e-57	15.8728	0.075034	5.3e-56
1949	slc7a3a	5	2	2.67064	-5.42799	3.85e-88	19.8681	0.0940565	5.34e-87
1950	ncam1a	1	1	1.67376	4.6135	0	43.596	0.206756	0
1951	ptpn13	5	2	2.06636	-5.03632	2.8e-75	18.3213	0.0867224	3.54e-74
1952	cadm1a	1	1	1.28378	3.98622	1.47e-142	25.3939	0.120316	2.82e-141
1953	rars1	2	2	4.17294	-3.00579	4.08e-139	25.0803	0.118665	7.64e-138
1954	slc13a5a	8	1	-1.46009	7.62848	0	37.6021	0.177666	0
1955	barhl1b	4	2	-1.15032	0.654026	1.35e-177	28.3898	0.133261	3.08e-176
1956	mapk10	1	1	3.16814	5.31293	7.84e-162	27.0828	0.127849	1.65e-160
1957	rxraa	3	2	-0.0955037	-1.00275	0	46.071	0.218477	0
1958	arhgap24	1	1	0.700602	5.29111	1.51e-108	22.1021	0.104611	2.38e-107
1959	hcn1	3	2	1.81774	-2.05923	0	79.053	0.375232	0
1960	whrna	3	2	0.398153	-0.947023	2.27e-146	25.7367	0.121934	4.44e-145
1961	vav2	1	1	1.35201	3.89439	3.21e-81	19.0512	0.0901188	4.26e-80
1962	pomp	6	2	-3.84661	-4.54945	7.02e-106	21.823	0.10333	1.09e-104
1963	pcsk1	2	2	3.06124	-1.00936	9.85e-103	21.4891	0.100912	1.5e-101
1964	ppp2r2bb	2	2	2.36002	-0.85531	4.93e-66	17.1238	0.0809528	5.81e-65
1965	CU462980.1	3	2	1.83213	-2.80368	2.15e-77	18.5844	0.0879365	2.77e-76
1966	dpysl3	7	2	-1.82655	-3.50548	3.73e-248	33.6241	0.159368	1.1e-246
1967	hspa4a	5	2	2.19801	-5.09481	1.33e-282	35.9038	0.170242	4.59e-281
1968	pafah1b1b	7	2	-0.594581	-3.76364	6.78e-62	16.56	0.0783034	7.68e-61
1969	arrdc1b	2	2	2.8437	-0.747209	1.18e-85	19.5787	0.0926801	1.61e-84
1970	ndst1b	3	2	1.18102	-2.15686	2.33e-118	23.0997	0.109388	3.87e-117
1971	stk10	11	2	-1.36979	-1.43553	0	41.0969	0.194665	0
1972	uqcr10	6	2	-2.89374	-4.90427	5e-151	26.1495	0.123893	1e-149
1973	aldocb	7	2	-0.519645	-3.76885	0	57.9549	0.275005	0
1974	rpl35	10	3	-8.01969	-3.47236	0	39.456	0.187109	0
1975	dbn1	1	1	2.64512	5.3925	6.04e-191	29.4514	0.139305	1.45e-189
1976	calm3b	6	2	-2.94904	-4.21414	0	40.6687	0.192874	0
1977	cpeb4b	3	2	0.125552	-3.10863	0	48.0989	0.228185	0
1978	ndufa2	6	2	-3.24057	-4.55576	2.56e-67	17.2951	0.0818059	3.04e-66
1979	hnrnpabb	6	2	-4.72762	-4.0711	2.83e-77	18.5696	0.0878522	3.65e-76
1980	cox7b	6	2	-3.23221	-4.93008	1.81e-226	32.1061	0.1522	4.95e-225
1981	rps14	10	3	-7.89765	-3.97312	9.25e-300	36.9871	0.175389	3.41e-298
1982	spry4	8	1	-1.953	6.48913	0	39.0509	0.185053	0
1983	prdx5	7	2	-2.33775	-4.38404	5.26e-211	30.9784	0.146814	1.37e-209
1984	pgk1	7	2	-0.485153	-4.05437	3.77e-152	26.248	0.124353	7.6e-151
1985	CABZ01086127.1	1	1	2.126	5.97121	4.34e-83	19.2752	0.0907759	5.82e-82
1986	CR792457.1	7	2	-2.32994	-3.26678	0	61.9332	0.293591	0
1987	rpl29	10	3	-7.65998	-3.66629	1.3e-219	31.611	0.149845	3.48e-218
1988	ndufs7	6	2	-2.75845	-4.81458	3.19e-62	16.6054	0.078551	3.62e-61
1989	gdf11	1	1	2.83475	5.48396	1.04e-202	30.3563	0.143134	2.62e-201
1990	id1	8	1	-2.46056	6.59228	0	54.7101	0.259358	0
1991	cacna1ab	2	2	4.49183	-2.59814	7.3e-254	34.0124	0.160855	2.23e-252
1992	lrrc38b	2	2	2.55176	-0.825421	8.17e-300	36.9904	0.175034	3.02e-298
1993	trib3	8	1	-2.59789	6.3136	1.01e-64	16.947	0.0799944	1.18e-63
1994	rps15	10	3	-7.89502	-4.00907	4.51e-275	35.418	0.16794	1.52e-273
1995	wnk2	5	2	2.90239	-3.35397	2.26e-211	31.0057	0.146817	5.87e-210
1996	ccdc120	4	2	-0.716332	0.235247	8.84e-90	20.0566	0.0946127	1.24e-88
1997	adgrl2a	1	1	1.1925	4.63884	0	45.5203	0.215901	0
1998	magi1b	1	1	1.674	4.60078	2.59e-91	20.2313	0.0957455	3.67e-90
1999	rem1	2	2	2.98443	-1.42178	0	72.7933	0.345382	0
[truncated: 415 more rows]
