# Supplementary material for: Single-cell transcriptomic profiling of the zebrafish inner ear reveals molecularly distinct hair cell and supporting cell subtypes
Source: eLife. 2023 Jan 4;12:e82978. doi: 10.7554/eLife.82978 (PMC9851615; doi:10.7554/eLife.82978)
Supplement: Supplementary file 6. [file elife-82978-supp6.csv]

	status	p_value	morans_test_statistic	morans_I	gene_short_name	q_value
ERC1	OK	4.86716983733098e-222	31.787179465707	0.186116232709575	ERC1	2.02682858225997e-220
wnt5b	OK	2.59757831297381e-29	11.1785157672654	0.0650869693944666	wnt5b	2.41717485998294e-28
fbxl14b	OK	0.0137962172170712	2.2030328351437	0.0125429565981158	fbxl14b	0.0364846098068784
CR749763.5	OK	0.00500238745523607	2.57566422816006	0.0143766141161069	CR749763.5	0.0144492281501686
atp6v1e1b	OK	3.82768866079765e-95	20.6617410479066	0.120839230706375	atp6v1e1b	7.34172356828892e-94
nampta	OK	1.65420975271826e-10	6.28359027332188	0.0364652327395788	nampta	9.04852373792146e-10
kmt2e	OK	0.000169594221029972	3.58337090014373	0.0206880028907964	kmt2e	0.000602288925768575
atp2b1a	OK	0	80.657815759677	0.472740328737652	atp2b1a	0
BX842699.1	OK	0.00114560020772377	3.04963446532459	0.0175446159317172	BX842699.1	0.00365754605290718
adipor2	OK	0.000562711184607925	3.25713665721924	0.0187859535912118	adipor2	0.00187438303041936
mdm1	OK	0.0120949438669265	2.25409984013829	0.0127330577744593	mdm1	0.0324002090124496
ndufb2	OK	7.11103212055129e-29	11.0887758357328	0.0646911341350021	ndufb2	6.55873672664092e-28
CU928073.1	OK	0.000223570536661644	3.51057356061432	0.0191010319595893	CU928073.1	0.00078310601978074
acot14	OK	0.0047711852498354	2.59198581868635	0.0140793146776561	acot14	0.0138372099754886
si:ch211-127b6.2	OK	6.00586656775167e-11	6.43918423094724	0.0372708077842305	si:ch211-127b6.2	3.34803355541398e-10
snap91b	OK	4.78214735799229e-175	28.1825692328817	0.164918732810523	snap91b	1.525237304294e-173
zgc:171673	OK	0.00050740086606782	3.28639063057403	0.0181130239856599	zgc:171673	0.00169826866641578
ccdc167	OK	1.20021750918086e-05	4.223962975598	0.0244066563239188	ccdc167	4.80489503954886e-05
grm8a	OK	1.55088452188866e-10	6.29360480939413	0.0363780597241338	grm8a	8.49816919764519e-10
svopl	OK	1.20017747131812e-18	8.73669213131426	0.0506065457437724	svopl	8.68569544701907e-18
calua	OK	4.16550442502382e-09	5.76162062896931	0.0332001102069791	calua	2.12030518641467e-08
sema3c	OK	3.10743789995832e-20	9.14052693977642	0.0531888272306788	sema3c	2.35990186955635e-19
acot15	OK	1.97939986036861e-41	13.4313955562721	0.0779798647697441	acot15	2.23722160052212e-40
mrps33	OK	1.44390078998268e-07	5.13062601355734	0.0296800380154594	mrps33	6.68460736917374e-07
sema3aa	OK	0.000156689788575217	3.60398132996124	0.020789643718802	sema3aa	0.000558994778681105
scube1	OK	1.58166119965772e-10	6.29055534584302	0.0363535352372037	scube1	8.66302482285763e-10
si:ch211-51e12.7	OK	0.00120223749946966	3.03511059350109	0.0174756313351086	si:ch211-51e12.7	0.00382424716079241
opn1sw1	OK	0.0015590717217445	2.95584441102566	0.0160561557066477	opn1sw1	0.00487822878088029
tmem178b	OK	0	44.1854043702579	0.25879913032403	tmem178b	0
CR792454.1	OK	6.04912328605325e-08	5.29200517857941	0.0305638138003603	CR792454.1	2.87044239367914e-07
drd4-rs	OK	0.00113739406751952	3.0517931339715	0.0169612528034782	drd4-rs	0.00363412335950126
chpt1	OK	1.53083924907615e-10	6.29562290888625	0.0365349586139691	chpt1	8.39199849881698e-10
epyc	OK	6.21442798770956e-08	5.28707372053793	0.0304277158984928	epyc	2.94609484160157e-07
si:dkey-72l17.5	OK	0.00878326370778768	2.37463045630461	0.0135241370504569	si:dkey-72l17.5	0.024239061854968
cd36	OK	3.75205088226451e-13	7.16992107143344	0.0339216828160198	cd36	2.28745533967629e-12
si:dkeyp-38g8.5	OK	0.00586032238154845	2.52044531811023	0.0142054120658362	si:dkeyp-38g8.5	0.0167345280536551
ube2nb	OK	7.62826346638022e-13	7.07213737541214	0.0410441160603927	ube2nb	4.59694559708379e-12
waslb	OK	1.43626884518159e-05	4.18334277957589	0.0241959254122061	waslb	5.69802558630437e-05
gpr85	OK	2.70469014714749e-23	9.8737675723444	0.0574648158801139	gpr85	2.21147675469147e-22
acot16	OK	5.89797066146821e-17	8.28515091218578	0.0477889806690919	acot16	4.06869087816033e-16
lamtor4	OK	7.49606928682101e-06	4.32880384820269	0.0250034014042403	lamtor4	3.04964233935923e-05
atp6v1f	OK	1.47297270671778e-06	4.67455300792228	0.0270419093153241	atp6v1f	6.32510325191985e-06
tmem168a	OK	1.19064136913797e-06	4.71803949385109	0.0272020069277151	tmem168a	5.15690886021418e-06
mybpc1	OK	0.00901107697534129	2.36516265087622	0.0132857495675553	mybpc1	0.024807675015905
samm50l	OK	0.0113298248457168	2.27912476614821	0.0129677058328435	samm50l	0.0305307297707487
pcloa	OK	2.45242411774032e-116	22.8976384465319	0.133958678149898	pcloa	5.50401255216043e-115
mrpl42	OK	1.57163292531823e-05	4.16283058456505	0.0240165886428217	mrpl42	6.21243547852455e-05
mrps10	OK	1.24645384051154e-11	6.67378381497171	0.0387469461636778	mrps10	7.15206027186626e-11
si:dkey-265e7.1	OK	7.77871070684583e-09	5.65530008739173	0.032721155731927	si:dkey-265e7.1	3.90712279522978e-08
gnai1	OK	1.57653623079837e-141	25.3005117976076	0.148067543228794	gnai1	4.08709273731999e-140
ifrd1	OK	3.57884370432269e-30	11.3531026657922	0.0662509909386585	ifrd1	3.39070418834715e-29
shisal1a	OK	2.57804871367703e-194	29.7133912376114	0.173852690301077	shisal1a	9.16724868130063e-193
tulp4a	OK	0.00106453787597813	3.07161017581709	0.0175948851079767	tulp4a	0.00341614183472807
CR293509.1	OK	5.66442838136549e-05	3.86021227235099	0.0221345130640887	CR293509.1	0.000211785205263675
acot17	OK	1.31561434957966e-47	14.4466645417219	0.0840413598252709	acot17	1.61830893668363e-46
si:ch211-214j24.10	OK	4.19563356273849e-34	12.1188654753617	0.0707197729987974	si:ch211-214j24.10	4.24456568943871e-33
znf1042	OK	8.15200838274633e-05	3.77031723273055	0.0217277935345216	znf1042	0.000299344804668328
cd9b	OK	0	53.518369558944	0.313212418509035	cd9b	0
mkrn1	OK	4.71840885230596e-18	8.58061384915623	0.0499737028622253	mkrn1	3.36134673255067e-17
akr1b1.2	OK	0.0178852552309083	2.09952654364427	0.0118295649578494	akr1b1.2	0.0460192408276342
osgep	OK	0.00643932006597859	2.48710770839862	0.0140841690515351	osgep	0.0182628504775949
dock4b	OK	3.68413822407272e-41	13.3853165623513	0.0781656053526308	dock4b	4.15090611861928e-40
fam3c	OK	1.90851610103868e-33	11.9940649572816	0.0699982346559765	fam3c	1.9130183981183e-32
lum	OK	0.00372425637619008	2.67609680467643	0.0148251192702832	lum	0.011010327893352
pnpla8	OK	0.000304340406691783	3.42771646835879	0.0197117144817582	pnpla8	0.00104901823942751
dynlt1	OK	1.72805115492027e-11	6.62569838118934	0.0384625379025997	dynlt1	9.85453011890267e-11
si:dkey-247i3.6	OK	0.0123727510741582	2.24535265651504	0.0114105345858174	si:dkey-247i3.6	0.0330639054128635
dcn	OK	3.2267260639677e-34	12.1403687806796	0.0703832473827359	dcn	3.272281379353e-33
glt8d2	OK	1.86987337136189e-06	4.6253453952945	0.0261225504198229	glt8d2	7.9666647767966e-06
prdm4	OK	0.000487833104780214	3.29745121881031	0.0183655080287303	prdm4	0.00163583307968635
rpl18a	OK	9.95518250090448e-184	28.8823198677228	0.169070243335848	rpl18a	3.34539504175837e-182
hsp90b1	OK	7.63182530502747e-11	6.40271645388143	0.0372243946988098	hsp90b1	4.24311884168848e-10
acot18	OK	1.19105598671328e-06	4.71796864379501	0.0272370315425864	acot18	5.15781353099242e-06
si:dkey-240n22.6.1	OK	8.6054328853103e-05	3.75678730264106	0.0215984692472472	si:dkey-240n22.6.1	0.000315440264661272
ano6	OK	9.37948127259734e-13	7.04341115928985	0.039723903574178	ano6	5.62926061821266e-12
ano2b	OK	0	59.6275257884617	0.349354521786814	ano2b	0
CU468826.1	OK	6.79173676178303e-05	3.81563214980123	0.0219226917835723	CU468826.1	0.000251532056258146
BX571954.2	OK	0.00375797785710564	2.67307449852488	-7.40455401472815e-05	BX571954.2	0.011101667086941
slc41a2b	OK	0.00657304758253818	2.47978682394555	0.0141962131918983	slc41a2b	0.0186065638941565
btg1	OK	1.57953920425817e-77	18.6009086016342	0.108783229293644	btg1	2.59315444083485e-76
nrcama	OK	0	43.6193211682923	0.255350763193458	nrcama	0
CU467646.4	OK	3.16978332419381e-13	7.19297260491199	0.0333734488431108	CU467646.4	1.94002192759313e-12
chst11	OK	2.30332474985359e-24	10.1177975240888	0.058844293690284	chst11	1.93246479765996e-23
CU467646.6	OK	0.000699143979224299	3.19500422028127	0.0151885245899387	CU467646.6	0.0022970957293806
trpm2	OK	3.91681569558019e-10	6.14826249889198	0.03521464674555	trpm2	2.10483714196141e-09
tnni4a	OK	7.67922914567277e-33	11.8782302450326	0.0683094921517068	tnni4a	7.63022574129492e-32
magi2a	OK	7.45018199159009e-96	20.7406165153206	0.121289012857897	magi2a	1.43668163343979e-94
apex1	OK	4.05963152678339e-17	8.32948813909145	0.0483549569837656	apex1	2.81135090455616e-16
slc26a5	OK	0.00048801630258802	3.2973457760593	0.0189978539707116	slc26a5	0.00163619622514424
ntf3	OK	4.14195965154364e-05	3.93603414139959	0.0227040795399393	ntf3	0.000156731753214411
znf1073	OK	0.00473091160945747	2.59490076806848	0.0132149092022241	znf1073	0.013734710264909
nfyba	OK	5.74925606787693e-08	5.30129340071094	0.0307160437557393	nfyba	2.73435971097717e-07
psmc2	OK	1.13731731185267e-10	6.341550979157	0.0368256983670047	psmc2	6.26349026600057e-10
FAR2	OK	9.62252004199502e-08	5.20648581256973	0.0301134236563782	FAR2	4.51144482761872e-07
lamb1b	OK	7.07479113986319e-180	28.5739784688783	0.166297801332341	lamb1b	2.32448150832543e-178
psmb10	OK	3.73158704384875e-34	12.1284689258212	0.0705560957397885	psmb10	3.77663123141883e-33
znf1104	OK	0.00211121027320686	2.8610487984448	0.0162040702427858	znf1104	0.00648681582780032
gnsa	OK	9.36925254390763e-06	4.27941515655456	0.0247379140465272	gnsa	3.78103335517097e-05
sinhcaf	OK	8.06358625976784e-06	4.31270158589632	0.0249266823177	sinhcaf	3.27044238709141e-05
anks1b	OK	3.37671476276625e-35	12.3236872591032	0.0716631649237021	anks1b	3.47072006509992e-34
dennd5b	OK	9.94775626967599e-98	20.9472089770528	0.122535104365207	dennd5b	1.94828360878521e-96
sbf1	OK	4.48876653036893e-164	27.2725582881787	0.159629779924444	sbf1	1.32699160554031e-162
net1	OK	1.69022901095481e-21	9.45024275202532	0.0549039524205771	net1	1.32579321262911e-20
arhgef39	OK	1.22707271120394e-05	4.21897586247025	0.0240103666551797	arhgef39	4.90770354134837e-05
si:dkey-61p9.7	OK	0.0104857438868624	2.30849739110289	0.0125236287341396	si:dkey-61p9.7	0.0284488218073326
tmcc3	OK	1.60360955369395e-120	23.3138643698757	0.136364465530916	tmcc3	3.69154158875608e-119
lrtm2a	OK	3.15672062356078e-07	4.98137392026285	0.0287922554616629	lrtm2a	1.42126130229966e-06
si:dkey-7j22.2	OK	0.0114464937290786	2.27521580086559	0.0122646440082811	si:dkey-7j22.2	0.0308153083434569
pkp2	OK	7.35223804160840e-12	6.75078757012456	0.0392415400617048	pkp2	4.25862420205825e-11
pdzrn4	OK	5.42627306177015e-133	24.5125593639883	0.143313839416367	pdzrn4	1.32972863524453e-131
trhde.2	OK	1.17205085872774e-15	7.92163361716993	0.0451596745642872	trhde.2	7.79987867731503e-15
agbl5	OK	0.0120663176664111	2.25501104788833	0.0128555427117047	agbl5	0.032327724439378
ndufa12	OK	2.75162047346405e-107	21.9706035434462	0.128516445597175	ndufa12	5.73402939727933e-106
ost4	OK	7.53832466804035e-26	10.4472934178601	0.0609222699283821	ost4	6.51649176217598e-25
yaf2	OK	5.06806139442153e-08	5.32426647009689	0.0308674466207649	yaf2	2.41864136867987e-07
rassf3	OK	0.00272536516047517	2.77911452988294	0.0159157965554923	rassf3	0.00820785430177223
tspan33a	OK	1.39259238309254e-18	8.71987118266755	0.050697860421923	tspan33a	1.00549822729686e-17
yeats4	OK	0.00109495156347402	3.06319089679924	0.0175894419819397	yeats4	0.00350342574916787
kcnc2	OK	1.19841092506774e-66	17.2059336878004	0.0997190516268427	kcnc2	1.79360976003123e-65
gxylt1b	OK	5.3577883342909e-05	3.87378998017278	0.0222090850132698	gxylt1b	0.000200949125901165
lmo3	OK	1.33866815471386e-05	4.1993065688837	0.0241827863536367	lmo3	5.33360965837919e-05
trhde.2.1	OK	2.43788403477928e-06	4.57006334927952	0.0262320198086041	trhde.2.1	1.02818497422412e-05
tcp11l2	OK	9.36684600191762e-28	10.8557140114156	0.0633331477373801	tcp11l2	8.42848034537232e-27
creb3l2	OK	6.33798458296674e-17	8.27658344389481	0.0481686401886022	creb3l2	4.3662252132562e-16
naf1	OK	1.40273627837364e-08	5.55316237048627	0.0321437187271301	naf1	6.92773754187326e-08
ckap4	OK	1.98696280415327e-09	5.88527504611989	0.0337578473259863	ckap4	1.02894382436105e-08
uhrf1bp1l	OK	2.72128210176326e-228	32.2364793625229	0.18873555642863	uhrf1bp1l	1.16416076807343e-226
cpm	OK	0.000397698564068551	3.35439159234546	0.0192579835601568	cpm	0.00135148506203531
golt1ba	OK	0.0013037130979706	3.0105877213637	0.0172067109963622	golt1ba	0.00412869929927047
BX465862.4	OK	0.000704390460434469	3.19284592699836	0.0183745084029458	BX465862.4	0.00231222183417523
BX324164.3	OK	0.00671337847974958	2.47224471888056	0.0136750389589815	BX324164.3	0.0189823691753713
STMP1	OK	3.99924200652102e-13	7.16118120021062	0.041655615747758	STMP1	2.43578712005528e-12
BX324164.4	OK	7.81890860095949e-05	3.78071569278638	0.0209412106233587	BX324164.4	0.000287914541300607
si:dkey-14d8.20	OK	0.0055764779160465	2.53786951807306	0.0145148270376786	si:dkey-14d8.20	0.0159749428496594
spx	OK	0.00403515475883112	2.64911403603296	0.0131389515017417	spx	0.0118520556120841
ccdc136b	OK	2.39656114505833e-14	7.53743314237362	0.0438094500523512	ccdc136b	1.52524476632311e-13
smo	OK	1.64767964890995e-33	12.0062279791448	0.069785443603949	smo	1.65288840010098e-32
usp6nl	OK	0.0100195486219636	2.32561502620908	0.0133227635649852	usp6nl	0.0273467680352755
si:ch211-258f14.2	OK	2.98104192755265e-31	11.5683461419955	0.0673895956018488	si:ch211-258f14.2	2.88650985252289e-30
mgst1.2	OK	0.000349740418376564	3.38978255090981	0.0193313014200026	mgst1.2	0.0011964577713267
mgst1.1	OK	0.0056695423267494	2.5320715628008	0.0140955630917118	mgst1.1	0.0162304164199247
fgd6	OK	2.78987352929901e-21	9.39764586113291	0.054428037879402	fgd6	2.17473070603224e-20
celf2	OK	6.99672467108593e-141	25.2416346238721	0.147517565053671	celf2	1.80453591336886e-139
tmtc1	OK	1.44588576628984e-05	4.18182607204234	0.0241986555906457	tmtc1	5.73436327719033e-05
si:dkey-51d8.6	OK	0.00615662627723418	2.50303741724896	0.0140629203505616	si:dkey-51d8.6	0.0175187814011332
dpysl5b	OK	9.60150269735272e-05	3.72927688325654	0.0214405034703557	dpysl5b	0.000350313012836465
mapk11	OK	0.0166293398546732	2.12894658786655	0.0118258352301664	mapk11	0.0431375125017386
coa6	OK	1.98162321665497e-17	8.41398108914442	0.0489629179172121	coa6	1.38569909116663e-16
ptprz1b	OK	0	59.5098074903513	0.348471964009109	ptprz1b	0
si:dkey-51d8.9	OK	0.013258847903623	2.21854498648668	0.0126392989872006	si:dkey-51d8.9	0.0351805734648523
ldhba	OK	2.01218377593157e-63	16.7703051486271	0.0980227473360658	ldhba	2.90405498438851e-62
socs2	OK	4.96792094098281e-05	3.89215332169926	0.0224249293842575	socs2	0.000186914017814045
BX649398.2	OK	0.0135007252844585	2.21149683841779	0.0125064233523448	BX649398.2	0.0357769220038151
si:ch211-162i8.2	OK	0.00419701594032259	2.63579543521338	0.0127101050837282	si:ch211-162i8.2	0.012287164849696
kcnd2	OK	6.13512280389819e-149	25.9651296146699	0.151801311645479	kcnd2	1.65555859602717e-147
si:ch211-152c2.3	OK	4.59452666075555e-71	17.7852876818872	0.103994947534618	si:ch211-152c2.3	7.10112138461657e-70
si:dkey-202b22.5	OK	5.53878429702078e-07	4.87146161589385	0.0256231375254471	si:dkey-202b22.5	2.45668406833004e-06
si:ch73-89b15.3	OK	1.80428137991781e-28	11.0051646217943	0.0632188014481073	si:ch73-89b15.3	1.6501835064998e-27
gata3	OK	5.54455580933426e-48	14.5060721771777	0.0846521051781149	gata3	6.85049135456878e-47
si:dkey-256i11.3	OK	0.017632358353143	2.10530558001724	-0.000123773504359021	si:dkey-256i11.3	0.045471205797237
tspan12	OK	1.90774694755773e-14	7.56713361985313	0.0439557895189727	tspan12	1.2191003881806e-13
si:dkey-256i11.6	OK	0.00180985337003452	2.90953170231802	-5.33354678192435e-05	si:dkey-256i11.6	0.00561803047714158
prickle1b	OK	0.00209050294582822	2.8641722462212	0.0162373617935136	prickle1b	0.00643028445999604
zdhhc17	OK	0.00109667217315698	3.06272102177418	0.0175736193693364	zdhhc17	0.00350848324513429
ube2h	OK	3.85891896703824e-05	3.95299707985756	0.0228680715915191	ube2h	0.000146463648122152
crybg1b	OK	0.00116736819930632	3.04397616173215	0.0175412012404214	crybg1b	0.00372183052122729
taf3	OK	0.000139103097192938	3.63479089241893	0.0210010918208775	taf3	0.000499023403481651
b2m	OK	1.28354447795103e-35	12.4014275841048	0.0723921798476233	b2m	1.3268938770208e-34
atp5f1c	OK	3.06801264578339e-69	17.5482322886012	0.10257589301024	atp5f1c	4.67266154417642e-68
si:dkey-3p4.7	OK	0.00296549760424254	2.75157215581143	0.015579502304285	si:dkey-3p4.7	0.00889684770712737
cdkn1ba	OK	1.91175749727538e-06	4.62075205850292	0.026707632246901	cdkn1ba	8.13543518913537e-06
csrp2	OK	6.66088283891602e-16	7.99158237558054	0.0464743187739109	csrp2	4.46833481104591e-15
tnni1d	OK	0.0150809394409295	2.16795804434368	-0.000118286096714476	tnni1d	0.0394968732602392
CDPF1	OK	6.6323022617435e-07	4.83574775346734	0.027997657904526	CDPF1	2.92360093897746e-06
nav3	OK	4.4930576680319e-09	5.74883368935876	0.0333149069674037	nav3	2.28425193023508e-08
cyb5r3	OK	0.000896054709165668	3.12268252970034	0.0179422371079966	cyb5r3	0.00290334696963605
lsm8	OK	1.10430383266569e-08	5.59481215194868	0.032447147345721	lsm8	5.48302491208087e-08
AL590150.2	OK	4.43048723567006e-05	3.91983464273041	0.0225729277941733	AL590150.2	0.000167371736755595
hmga2	OK	6.21312385162981e-30	11.3047819318168	0.0659089400045861	hmga2	5.85111952804312e-29
vegfab	OK	6.55755494630809e-15	7.70469992964352	0.0444966714709221	vegfab	4.26658045546321e-14
plxna4	OK	0	68.9727491034775	0.404223163513919	plxna4	0
iqsec3a	OK	1.54525215567262e-53	15.3588409619157	0.0892203972337107	iqsec3a	2.02498307843998e-52
syt1a	OK	9.2726187437852e-47	14.3115063497363	0.0833818718597974	syt1a	1.12732919150316e-45
shank3b	OK	2.24482654105033e-15	7.84044143028702	0.0451615438314443	shank3b	1.48015666905814e-14
btbd11a	OK	3.38234622023438e-70	17.6730433943133	0.103186789285746	btbd11a	5.19240890355515e-69
msrb3	OK	2.54275071680692e-21	9.40740222277125	0.0548409555165091	msrb3	1.98518273807638e-20
mtpn	OK	6.94319245863799e-79	18.7676619554682	0.109687355284135	mtpn	1.15500259950628e-77
mrps18a	OK	8.11624315281251e-10	6.03161926031021	0.0349446724515135	mrps18a	4.28620390979265e-09
chrm2a	OK	2.8873232549859e-05	4.0218351635254	0.022839286648486	chrm2a	0.000110896746865699
atxn10	OK	0.0113770377771669	2.27753871337094	0.0126354780778746	atxn10	0.0306414868968412
gpr22a	OK	0.0175143462602857	2.10802655497014	0.0118155418933184	gpr22a	0.0451901138739298
pawr	OK	1.87152074343334e-44	13.937602421476	0.0813975836573017	pawr	2.20890553282158e-43
znf1064	OK	5.06338311888182e-14	7.43923809093542	0.0426357242476783	znf1064	3.18769340550598e-13
def6c	OK	9.16893381725381e-05	3.74087779135569	0.0211296879321032	def6c	0.000335311454215515
ndufa5	OK	6.41744148458316e-92	20.3000902996844	0.118727059481769	ndufa5	1.19612520875104e-90
si:ch211-238e22.4	OK	9.25949828846182e-06	4.28203725587338	0.0235011288072826	si:ch211-238e22.4	3.74095668966075e-05
ppp1r12a	OK	8.45280135520262e-11	6.38710458261039	0.037145781998838	ppp1r12a	4.68812560118528e-10
etnk1	OK	2.48704447056808e-14	7.53259715599969	0.043837210958919	etnk1	1.58082448865799e-13
si:ch211-238e22.8	OK	0.00639275834496697	2.48968831091926	0.0141022287348429	si:ch211-238e22.8	0.0181392256876035
CR293502.1	OK	0.000976310653991057	3.09734552975934	0.0164651573744961	CR293502.1	0.00314833184781345
alg12	OK	0.00911293725752336	2.36099707201846	0.0134794975579913	alg12	0.0250715785896459
elk3	OK	0.0176888097812986	2.10400948583162	0.0120149088341267	elk3	0.045602712094547
BX942819.3	OK	0.000758262780886388	3.17150251258458	0.0180983837985777	BX942819.3	0.00247898926109036
meig1	OK	5.16717472088709e-152	26.2359711299162	0.15351022154406	meig1	1.40799894649911e-150
dclre1c	OK	1.12641649448275e-13	7.33286532602243	0.0426300928971974	dclre1c	7.00176917931767e-13
slc38a4	OK	1.99224494844809e-06	4.61218975686819	0.0266998659014734	slc38a4	8.46932145372988e-06
cdk17	OK	1.89756239313277e-09	5.89288415443918	0.0342437978283571	cdk17	9.83867458809625e-09
lemd3	OK	0.00114295601125045	3.05032848415483	0.0175063350931732	lemd3	0.00365049869359631
sox5	OK	1.66646709573163e-71	17.8420415101592	0.104253158920475	sox5	2.58999774475488e-70
cry1a	OK	1.71106330362094e-76	18.4727479103136	0.107965535947934	cry1a	2.77276315180824e-75
tafa5a	OK	1.57798524149729e-43	13.7845802083923	0.0794161903169819	tafa5a	1.83993079158585e-42
faxca	OK	0.00389983872269888	2.66062066455159	0.0150364107334749	faxca	0.0114869059968674
ccnc	OK	0.0118017591069848	2.26352219151025	0.0129349208889133	ccnc	0.0316764774146683
nell2b	OK	0.00117157310207273	3.04289430038858	0.0175066508209822	nell2b	0.00373476171107088
AL929171.1	OK	0.000634352046491202	3.22296645769827	0.0174108689274237	AL929171.1	0.00209851827045235
chchd3a	OK	9.00696945329284e-10	6.01477260280395	0.0349484876360158	chchd3a	4.74161522941197e-09
rps16	OK	7.18714971345134e-172	27.9221311736284	0.163443494749031	rps16	2.2521832020814e-170
ppfibp1a	OK	1.7057065411243e-07	5.09917263810271	0.0290601784733679	ppfibp1a	7.8488174154635e-07
tbc1d22a	OK	0.000115933058986105	3.68149963867155	0.0212792250848364	tbc1d22a	0.000419080873211632
slc38a2	OK	2.20674309042346e-25	10.3449061267518	0.0603414810909298	slc38a2	1.89390080567702e-24
exoc4	OK	0.000220632952583429	3.51408841961964	0.0202901197749302	exoc4	0.000773248635301828
CR383662.1	OK	2.90022878332505e-05	4.0207848012477	0.0231607135184468	CR383662.1	0.000111358301989854
BX569790.1	OK	0.000220230621204964	3.51457321153449	0.0201242749696065	BX569790.1	0.000771946510484794
cerk	OK	1.21715040950019e-08	5.5779067496175	0.0323672666406285	cerk	6.0325709007039e-08
slco1c1	OK	1.18193978149058e-09	5.9705963327715	0.0342461397900132	slco1c1	6.19745835226676e-09
tmbim4	OK	1.23014179914829e-36	12.5879340901404	0.0734884462338759	tmbim4	1.28493436511868e-35
ahcyl2b	OK	1.37076542082591e-26	10.6077913100741	0.0618934738128327	ahcyl2b	1.20447663283157e-25
bik	OK	1.21479960962651e-22	9.72200073228706	0.0531731769059762	bik	9.79852362089028e-22
sfmbt2	OK	2.89439038306528e-06	4.53396068790626	0.0262297378555441	sfmbt2	1.21458775549152e-05
gramd4a	OK	9.20185807077672e-09	5.6263739444207	0.0326431726851866	gramd4a	4.59982811518049e-08
nuak1a	OK	1.83366628762747e-11	6.6169307195157	0.0379443497204578	nuak1a	1.04449398237976e-10
BX119963.2	OK	0.00274840582758629	2.77637884919449	0.0151839828278001	BX119963.2	0.00827128279612973
si:dkey-156k2.4.1	OK	1.06715407720003e-07	5.18724242951373	0.0271952538768884	si:dkey-156k2.4.1	4.98648379521484e-07
pde3a	OK	1.1080388688295e-12	7.02016412465187	0.0405082677821712	pde3a	6.62945737534288e-12
celsr1a	OK	5.0259572828198e-63	16.7158250242485	0.0977318998876648	celsr1a	7.21624989249769e-62
lrguk	OK	1.83629406823976e-06	4.62909976451937	0.026789018108113	lrguk	7.82892108787459e-06
ppfia2	OK	2.35526920037578e-36	12.5365511009591	0.0728923877230523	ppfia2	2.4520034711055e-35
arid2	OK	0.000227326649668949	3.50614158663129	0.0202128172829259	arid2	0.00079592901963001
rap1b	OK	0.00169054085493418	2.93078364378236	0.0168744241612596	rap1b	0.00526527129983165
plxnb2a	OK	0.00252911710134276	2.80330160585792	0.0160601330592368	plxnb2a	0.00765083101406562
gas2l3	OK	4.49184781193032e-05	3.91651841570912	0.0224678649046472	gas2l3	0.000169664204907761
camk1da	OK	8.39415374872471e-50	14.7908251037853	0.0863866014369115	camk1da	1.0521652016339e-48
grip1	OK	7.33011905633561e-99	21.0710632605166	0.123272991957175	grip1	1.44578091757103e-97
si:dkey-196n19.2	OK	0.0192064642104232	2.07042109138335	0.0110568147375202	si:dkey-196n19.2	0.0490362410928913
llph	OK	0.00107239126958838	3.06941524295994	0.0176289405330021	llph	0.00343738354907444
pfkfb3	OK	2.58625745278797e-38	12.8892789584956	0.0750605862515565	pfkfb3	2.78261322248677e-37
tmem209	OK	0.00221504799093666	2.8457931637986	0.0159950350459373	tmem209	0.00677596559912033
bcat1	OK	0.000548498365763133	3.26439097434285	0.018744826889809	bcat1	0.00182947119895104
plekha5	OK	0.000824330456318417	3.14715756758025	0.0181386498709125	plekha5	0.00268239099291879
si:dkey-26i24.1	OK	1.88325342212373e-07	5.08039509559324	0.0223877177095683	si:dkey-26i24.1	8.62306484734606e-07
si:dkey-28k24.2.1	OK	1.86558654656408e-05	4.12352539041739	0.0228539044667114	si:dkey-28k24.2.1	7.31441806941115e-05
optn	OK	1.21811817589871e-09	5.96567576549624	0.0346104088020999	optn	6.38181913304173e-09
si:ch73-352p4.8	OK	4.62922324234027e-06	4.43380478611582	0.0249100073854375	si:ch73-352p4.8	1.91596495727635e-05
golgb1	OK	1.2325679467059e-10	6.32915112103234	0.0368012980569295	golgb1	6.78206031655278e-10
tspan9b	OK	5.17624809218309e-11	6.46171203945447	0.037520223669208	tspan9b	2.89650364783343e-10
ELAPOR2	OK	4.51204489131875e-30	11.3328301706353	0.0660295937383429	ELAPOR2	4.26356778667432e-29
wnk1b	OK	1.67457831619977e-05	4.14832572101425	0.02399744690361	wnk1b	6.59648079962475e-05
si:dkeyp-35e5.9	OK	7.95876347880473e-15	7.67993022038002	0.0375844921826003	si:dkeyp-35e5.9	5.16485223013606e-14
si:dkey-31f5.11	OK	0.0021926114461424	2.84903374575189	0.0159824239261676	si:dkey-31f5.11	0.00670978715128709
ccnd2b	OK	0.0045496576020182	2.60830005998522	0.0141109248376768	ccnd2b	0.0132468485975603
si:dkey-28k24.2.2	OK	2.68014890181828e-06	4.55016848237453	0.0262294717705244	si:dkey-28k24.2.2	1.12751557005676e-05
CR382372.1	OK	3.37704178336411e-24	10.0802691808681	0.0584620650581408	CR382372.1	2.82008862315639e-23
copg2	OK	0.000751003822007648	3.17429535690395	0.0182848910699895	copg2	0.00245685956073466
lrrc4.1	OK	0.0066511206147534	2.47557340874021	0.0141199943694915	lrrc4.1	0.0188169442152413
snd1	OK	6.71674309704604e-40	13.1678696598571	0.0768967979113498	snd1	7.41118101671862e-39
foxp2	OK	9.32854574663364e-07	4.76745147147568	0.0275915983986474	foxp2	4.07558928759775e-06
ppp1r3aa	OK	5.54200101208838e-22	9.56626274767645	0.0556947836114862	ppp1r3aa	4.39381478089955e-21
si:dkey-112e7.2	OK	6.18628826129728e-19	8.81127921663947	0.0513250108756066	si:dkey-112e7.2	4.51745005599946e-18
recql	OK	7.99788043518802e-11	6.39556229649825	0.0371366710252021	recql	4.44171166658681e-10
MDFIC	OK	2.22216826415234e-07	5.04886887071059	0.0289232421694932	MDFIC	1.01268017113316e-06
si:dkey-27n6.1	OK	0.0174723239539845	2.10899923218821	-0.00012344999633134	si:dkey-27n6.1	0.0451057224408558
si:dkey-14o6.2	OK	0.0165132820257341	2.13176021229356	0.0116537273591155	si:dkey-14o6.2	0.0428675020299398
si:dkeyp-5g9.1	OK	0.0186809937942199	2.08178636665218	0.0114520619381824	si:dkeyp-5g9.1	0.0478212839198711
znf1015	OK	0.00455991145301314	2.6075294353527	0.014950350700759	znf1015	0.0132751620271265
si:ch73-266f23.3	OK	0.0129536082798316	2.22759976198514	0.012518938591258	si:ch73-266f23.3	0.0344508811762251
zgc:173615	OK	0.00798659278953029	2.40952765181617	0.01368638090567	zgc:173615	0.0222289213545836
rab21	OK	0.00226695610623586	2.83840845985118	0.0162959410087372	rab21	0.00691787250483588
kcna1b	OK	1.63462217773275e-08	5.52636992630637	0.0318218624454979	kcna1b	8.04759296417565e-08
CABZ01117780.1	OK	1.28646233071905e-42	13.6323135156694	0.0793606288591643	CABZ01117780.1	1.4820921033454e-41
zgc:172139	OK	0.00470491937534628	2.59679382281699	0.0148589771815794	zgc:172139	0.0136687476904109
CABZ01066312.1	OK	1.87908954403895e-05	4.12186470543854	0.0238503075385974	CABZ01066312.1	7.36505562531463e-05
si:dkey-71l4.5	OK	0.0124942082785538	2.24158175016244	0.0120756846436505	si:dkey-71l4.5	0.0333367930250705
si:dkey-261j11.3	OK	0.0150809394409295	2.16795804434368	-0.000118286096714476	si:dkey-261j11.3	0.0394968732602392
si:ch211-232d10.3	OK	0.0150809394409295	2.16795804434368	-0.000118286096714476	si:ch211-232d10.3	0.0394968732602392
BX897729.1	OK	1.31607600955806e-09	5.95303486146248	0.0344298095376888	BX897729.1	6.87634628670508e-09
rab3ip	OK	5.03215058836443e-38	12.8378403385428	0.0749632781672517	rab3ip	5.39337251388233e-37
LO018021.1	OK	0.0075606348483588	2.42946152665047	0.0137032664530295	LO018021.1	0.0211419470176806
CABZ01020840.1	OK	4.90267441287186e-45	14.0329034589734	0.0781714983305743	CABZ01020840.1	5.84705731951877e-44
LO018260.2	OK	0.00026758961530697	3.46250134955323	0.0181531198035125	LO018260.2	0.000929371580234196
OSBPL8	OK	1.15006873092081e-08	5.5877626296613	0.0324405989929214	OSBPL8	5.70686322554506e-08
cct2.1	OK	6.09757481723285e-10	6.07765668913691	0.035212963472731	cct2.1	3.24268356158698e-09
abcd2	OK	0.0153372507059635	2.16126983800703	0.0123066390155583	abcd2	0.0401136711473969
CR628395.1	OK	0.00359692452501812	2.68773487054615	-7.27615134394333e-05	CR628395.1	0.0106623271748468
arl1	OK	6.46145486369337e-12	6.76949901065895	0.0393437145780688	arl1	3.75219393045933e-11
large1	OK	0.00359510844815766	2.68790351676447	0.0152823650394074	large1	0.0106582040783898
BX901962.4	OK	0.00164951958822411	2.93840671927285	0.01674982637844	BX901962.4	0.00514389931051004
CT737127.1	OK	0.00164471735435583	2.93931038929433	0.0151608947827597	CT737127.1	0.00512956200004308
smkr1	OK	5.4395643109332e-10	6.0959472507693	0.0353031676772882	smkr1	2.89952025751189e-09
nap1l1	OK	1.60034168840017e-19	8.96157673916937	0.0522355782843237	nap1l1	1.19224266824677e-18
phtf2	OK	0.00144256141918971	2.97971966786374	0.0169377483863727	phtf2	0.00453974042401039
dusp16	OK	0.00170228330799435	2.92863252673089	0.0167189836595282	dusp16	0.00529986838650152
BX548011.2	OK	4.48365381583733e-28	10.9228145811909	0.06370597602139	BX548011.2	4.05485993900527e-27
SCYL2	OK	7.68866322898773e-12	6.74429364528418	0.0391973613947267	SCYL2	4.44937900478978e-11
DGKI	OK	1.83543482514782e-56	15.7895677073935	0.0921429180954405	DGKI	2.4711340296257e-55
zmp:0000000711	OK	2.59922007095598e-12	6.90004955656328	0.0401044902580955	zmp:0000000711	1.53209141685388e-11
ms4a17a.9	OK	0.00138400748583267	2.99239099559494	0.0170110953157131	ms4a17a.9	0.00436753319012325
BX248410.2	OK	0.0102242927030451	2.31801353624913	-0.000105143506678025	BX248410.2	0.0278087006371528
LO018029.1	OK	0.00980879454252642	2.33358259022164	0.0132027296677528	LO018029.1	0.0268153402820714
BX571719.3	OK	9.18526249915043e-05	3.74043062156289	0.0214400533226829	BX571719.3	0.000335859605588101
AL935186.10	OK	0.0142184139423381	2.19120683960036	0.0122714964691304	AL935186.10	0.0374925233112941
BX324164.5	OK	2.08394174492254e-08	5.48358649511998	0.0311150744932298	BX324164.5	1.01896500104278e-07
tbk1	OK	5.14479652701585e-05	3.88365961440525	0.0223916367581893	tbk1	0.000193307710035612
si:zfos-451d2.2	OK	0.00191040859960907	2.89258833764086	0.0154474318330008	si:zfos-451d2.2	0.00591040764946315
PHF21B	OK	0.000194793266694407	3.54703925783944	0.0204689479737709	PHF21B	0.000686624353594221
phlda1	OK	2.59967967740804e-102	21.4439616983831	0.12505305939085	phlda1	5.25575563168888e-101
SLC2A13	OK	0.00526455735289675	2.55795027432832	0.0146462862164213	SLC2A13	0.0151471580718201
RERG	OK	1.12094305865602e-05	4.23932928026504	0.0240766568399571	RERG	4.49614744599164e-05
ms4a17a.11	OK	1.11515322599816e-05	4.24049173749138	0.0243969968021349	ms4a17a.11	4.47363997800416e-05
CT583728.27	OK	0.000337416183405283	3.39960511007092	0.0183834142870294	CT583728.27	0.00115634809320397
ttll12	OK	0.000764802507002933	3.16900739854712	0.0181779633371224	ttll12	0.00249906596038276
tfec	OK	3.84636436953753e-07	4.9430055642451	0.0201998241229709	tfec	1.72463796064991e-06
rpap3	OK	1.29257941514432e-09	5.95598130535258	0.0345448123779229	rpap3	6.75639561264657e-09
eps8a	OK	2.22775491684082e-07	5.0483891013211	0.0292327919632206	eps8a	1.01504158506511e-06
flncb	OK	0.000675465263509611	3.20493485486766	0.0184127876584312	flncb	0.00222425307906508
AL935186.9	OK	2.17739694594773e-09	5.87012016480434	0.0323618187709293	AL935186.9	1.12430821911356e-08
BX547928.1	OK	1.1309903731757e-05	4.23732552070892	0.0244221969678793	BX547928.1	4.53499642756585e-05
nrxn2b	OK	2.01939305350641e-09	5.88259695123858	0.0338220242745901	nrxn2b	1.04530589424638e-08
drap1	OK	4.53791010173546e-20	9.09948855276498	0.0530075660160817	drap1	3.43480882670308e-19
ADGRL3	OK	7.5409679015685e-14	7.38643364743265	0.0429282813102951	ADGRL3	4.71080299836583e-13
enosf1	OK	2.19238940010495e-07	5.05144601022778	0.029288638367403	enosf1	9.99836453906333e-07
zfhx3	OK	4.93035281180713e-73	18.0376744529756	0.105477187267063	zfhx3	7.78821768362904e-72
CABZ01083442.1	OK	6.76680028140135e-55	15.5603597835069	0.0907741331319048	CABZ01083442.1	8.98024966937271e-54
smarcd3b	OK	0.000207561769213588	3.53027780331745	0.0203104761153858	smarcd3b	0.000729273439721856
mfap3l	OK	3.73313203918353e-198	30.0091004281986	0.175669755461372	mfap3l	1.3702179661829e-196
bdnf	OK	0	43.9476500120338	0.257427258044393	bdnf	0
stim2b	OK	1.43571601738235e-08	5.54910043082162	0.0322052530815184	stim2b	7.08363803183591e-08
got2b	OK	1.94027031440419e-33	11.9926984648262	0.0699627391435685	got2b	1.9440702043085e-32
syt7b	OK	4.40510567872629e-88	19.8612434629771	0.116072027781746	syt7b	7.95043875161911e-87
dnajb6b	OK	2.7942091247768e-139	25.0953611515729	0.146799552691451	dnajb6b	7.14775801520711e-138
adam10a	OK	0.000134093867753273	3.64423553881258	0.0210536173507032	adam10a	0.000481673473378249
rgs12a	OK	2.10577679254589e-27	10.7814582910155	0.0627911105870914	rgs12a	1.88131569537894e-26
stk33	OK	5.85074269440373e-57	15.8615264519128	0.0925716494623477	stk33	7.91966893120989e-56
tubgcp4	OK	0.00991236931416048	2.32964846065086	0.0132946335752188	tubgcp4	0.0270807744482006
pcdh7b	OK	0	41.1576841201166	0.241075931994912	pcdh7b	0
mtch2	OK	0.000742265424250538	3.17769058660661	0.0182901293569285	mtch2	0.00242954066073074
si:ch211-98n17.5	OK	0.000227688938171649	3.50571772993514	0.020217007450718	si:ch211-98n17.5	0.000796752371723211
si:dkey-85k7.7	OK	3.98484952218791e-14	7.47081937247364	0.043270424956018	si:dkey-85k7.7	2.51881474210108e-13
adcy7	OK	7.27328444874313e-103	21.5031517424933	0.125592735927031	adcy7	1.47638840360762e-101
tent4b	OK	8.31343291405997e-20	9.03349889668337	0.0526566737303625	tent4b	6.2435425321321e-19
intu	OK	5.7027180600836e-12	6.78754921168574	0.0394536704807975	intu	3.32082320669537e-11
sdhaf2	OK	7.8377419429281e-08	5.24444337284793	0.0303807408189418	sdhaf2	3.68984700032422e-07
acin1b	OK	1.98382151543712e-05	4.10935584093829	0.0237817489004673	acin1b	7.75977868161852e-05
bbox1	OK	0.000200920782497608	3.5388713990972	0.0203845737161891	bbox1	0.000707129453380954
pde5ab	OK	5.69589663816766e-142	25.340656554455	0.148102027536759	pde5ab	1.48430803349506e-140
trim66	OK	6.79460567382696e-06	4.35039564857361	0.0250045941621724	trim66	2.77642982293672e-05
usp10	OK	1.04358232459463e-05	4.25535620713522	0.0246398512344158	usp10	4.19726701351883e-05
si:dkey-56m19.5	OK	0.00140181859042182	2.98848559283146	0.0170614238415656	si:dkey-56m19.5	0.00442095738373185
BX511128.3	OK	1.2944911081876e-05	4.20689948641529	0.0233942060351454	BX511128.3	5.16169836029187e-05
rassf7b	OK	7.5821564772093e-93	20.4047798683031	0.119347659991352	rassf7b	1.42807724062479e-91
znf219	OK	1.51866604114153e-11	6.6447494935195	0.0383759894482174	znf219	8.68417860067905e-11
slc16a13	OK	0.00557292939436715	2.53809228880695	0.0144728838231489	slc16a13	0.015966601941416
polr2l	OK	2.83386750412585e-06	4.53841977529015	0.0262697196519503	polr2l	1.18958848728953e-05
zgc:154164	OK	0.0016901773878855	2.93085044465667	0.0166162742098306	zgc:154164	0.00526479335697087
sltm	OK	1.85344447711782e-08	5.50427578255482	0.0319650211765466	sltm	9.0963194199034e-08
dusp19b	OK	3.13168799045166e-49	14.7019457807999	0.0857825503526414	dusp19b	3.90394262718214e-48
si:ch211-122f10.4	OK	0.0130672708728182	2.2242066812427	0.0126183816987268	si:ch211-122f10.4	0.0347273840253025
si:dkey-46i9.1	OK	2.62170409121783e-10	6.21164108805654	0.0356133299220322	si:dkey-46i9.1	1.42104864568086e-09
ipo7	OK	0.00366162766643753	2.68177565275139	0.0154150588504775	ipo7	0.0108400264489753
CU459186.7	OK	0.018997855684779	2.07490099625352	0.0114309059192408	CU459186.7	0.0485749393513978
si:ch73-119p20.1	OK	1.35153232765603e-07	5.14305498613011	0.0275120591107646	si:ch73-119p20.1	6.26971945262935e-07
si:ch211-113a14.22	OK	0.00688109142955504	2.4634115970466	0.0129249429293393	si:ch211-113a14.22	0.0194106088722308
zgc:114045	OK	6.33482580595407e-06	4.36573412084531	0.0251073873887879	zgc:114045	2.59277956129735e-05
CU459186.5	OK	1.64950329520549e-06	4.65126775592122	0.0247660991675887	CU459186.5	7.05775697346072e-06
hist1h4l.3	OK	1.72346098620386e-06	4.64221602535587	0.0268237213372854	hist1h4l.3	7.36289084239e-06
kcnj10a	OK	6.84201139862634e-72	17.8917114322857	0.100905143990837	kcnj10a	1.06934154458955e-70
si:ch73-335l21.1	OK	2.42637038854533e-09	5.85214471919815	0.0339235833808133	si:ch73-335l21.1	1.24952093817672e-08
madd	OK	6.59130927471519e-84	19.3724525096345	0.113297440645945	madd	1.14430423966645e-82
CU459186.4	OK	2.92977724510633e-17	8.36801779796519	0.0379518267201888	CU459186.4	2.03565925048699e-16
psmc3	OK	7.79896224944004e-08	5.24535789365201	0.0303886852538228	psmc3	3.67365998931252e-07
CU457819.5	OK	0.0174723239539845	2.10899923218821	-0.00012344999633134	CU457819.5	0.0451057224408558
pnp5a	OK	1.8492095005504e-112	22.5051161385827	0.131012757256737	pnp5a	3.99636491114637e-111
si:ch211-119e14.1	OK	0.018079227883455	2.09514104979945	0.0114292189555581	si:ch211-119e14.1	0.0464706412191461
dagla	OK	9.01920969052565e-08	5.21849361724681	0.0302579638138785	dagla	4.23413048186868e-07
lgr4	OK	7.72069199194234e-65	16.9629426540066	0.0991420673725571	lgr4	1.13054922632011e-63
dennd2b	OK	1.10287573745148e-61	16.5306978293247	0.0965445471186588	dennd2b	1.56380044469294e-60
cxcl8b.1	OK	8.05282646293311e-42	13.4978270940227	0.0743892367583445	cxcl8b.1	9.15538805438867e-41
coro1b	OK	0.000841477476139712	3.14113315945683	0.0180846755715661	coro1b	0.00273463817077346
si:dkey-85k7.11	OK	0.00486109657694948	2.58555652009775	-8.17107904935435e-05	si:dkey-85k7.11	0.0140654236020582
cd59	OK	3.43899348676353e-14	7.49017876276399	0.0433270695049614	cd59	2.17652430496529e-13
camk2d1	OK	0.000230281719926776	3.50270256451144	0.0199759136457122	camk2d1	0.000805600395875572
si:ch211-163c2.1	OK	0.0150809394409295	2.16795804434368	-0.000118286096714476	si:ch211-163c2.1	0.0394968732602392
emc4	OK	2.58809594986694e-11	6.56577790164866	0.0381594876139668	emc4	1.46590549858144e-10
marveld3	OK	0.00717452606207078	2.4484043543739	0.0138858359337586	marveld3	0.0201566954891911
CU694197.1	OK	1.92300060422052e-22	9.67513064288439	0.0563901654951672	CU694197.1	1.54412883238962e-21
CT030129.1	OK	0	41.5873485364157	0.243502665222377	CT030129.1	0
rorab	OK	7.55407377641133e-31	11.4882849983949	0.0670221946291377	rorab	7.25845440785188e-30
nectin4a	OK	1.871370746198e-11	6.61391996433491	0.0377876701538356	nectin4a	1.06524507802992e-10
PAMR1	OK	1.08286522148937e-83	19.3468771963051	0.112361200820722	PAMR1	1.87474780645835e-82
kcna4	OK	1.12124502562119e-07	5.17802348678759	0.0297626399651133	kcna4	5.23045990831739e-07
nlgn2a	OK	1.66056828828517e-50	14.899488205435	0.0866836895687661	nlgn2a	2.10565434592923e-49
cdh1	OK	5.08495821199852e-161	27.0138209193232	0.157952137586372	cdh1	1.4669138943221e-159
ca7	OK	0.00351984661850107	2.69496070565461	0.0144640285115172	ca7	0.0104523850840089
cln6a	OK	4.6523723905158e-11	6.47783593096737	0.0374632202235586	cln6a	2.61093179892189e-10
mpped2a	OK	1.91262328012959e-19	8.94190318296545	0.0521116001220026	mpped2a	1.42193217703347e-18
mrpl52	OK	4.84517448626648e-06	4.42396998382005	0.0255716581003522	mrpl52	2.00402044540859e-05
plxdc2	OK	4.30388155464257e-15	7.75829663707861	0.0451049340642793	plxdc2	2.81120392635056e-14
tmem256	OK	4.68503780019239e-08	5.33853473686558	0.030932321061457	tmem256	2.2401146788675e-07
tex9	OK	4.44255618504271e-06	4.442665786071	0.0256820661463331	tex9	1.84144247689874e-05
cdh29	OK	3.00383838426227e-06	4.526118969883	0.0259018852383308	cdh29	1.2584094995834e-05
calml4a	OK	1.03274202250719e-253	34.0022229741244	0.199057387060741	calml4a	5.00770014743381e-252
mmp14a	OK	1.13655183156532e-10	6.34165468456742	0.0365643015898604	mmp14a	6.26140664908428e-10
map11	OK	4.01572449733014e-05	3.94345970875609	0.0226463739275139	map11	0.000152161725247233
ankdd1a	OK	1.07653696370235e-29	11.25642910611	0.0655344806009803	ankdd1a	1.00775597994975e-28
zdhhc13	OK	0.00752249344546112	2.43129433864688	0.0139321127545126	zdhhc13	0.0210470299312796
fgf11a	OK	1.59858209491957e-236	32.8185954839492	0.19190734598913	fgf11a	7.09289460841393e-235
nop10	OK	6.00672930870401e-26	10.4688172553117	0.0609077431721472	nop10	5.20687057537693e-25
cdh16	OK	0.00550591010459729	2.54232349769847	0.0144618242207654	cdh16	0.0157872195370181
rfx7a	OK	0.00297389489821432	2.75064590203785	0.0157855776021959	rfx7a	0.00891777167504004
BX323060.3	OK	0.0194879693582129	2.06444082868342	0.0116964568557322	BX323060.3	0.0496905186933385
cebpg	OK	3.06936743057714e-05	4.00741344082884	0.0231634999055758	cebpg	0.000117492704408518
C7H4orf54	OK	2.28719188592855e-11	6.5841684155851	0.0356955294381516	C7H4orf54	1.29781832024316e-10
lrp10	OK	0.0139710374827908	2.19809867452932	0.0125385468017069	lrp10	0.036906210606542
cd44a	OK	5.234144574871e-33	11.9102341431818	0.0611383485603452	cd44a	5.21314145202388e-32
tmem9b	OK	4.20315057175447e-08	5.35818312979668	0.0310718057584463	tmem9b	2.01508475202358e-07
mllt3	OK	1.24261549652055e-233	32.6153475799593	0.190939600119489	mllt3	5.44600137801987e-232
gal3st4	OK	1.45427321251637e-33	12.0165526547259	0.0701168000169465	gal3st4	1.4606240049909e-32
aep1	OK	0.00162728359245938	2.9426113510475	0.0158058429794188	aep1	0.0050770843035923
fhod1	OK	0	42.0276393180577	0.246148036206446	fhod1	0
rnf111	OK	3.49737652668111e-10	6.16620694471672	0.035841988950572	rnf111	1.88549961607245e-09
ank2b	OK	1.35707691423356e-116	22.923417988885	0.134051355454226	ank2b	3.0511714047463e-115
chrnb1	OK	4.67273230409252e-14	7.44983838058442	0.0433014168798158	chrnb1	2.94545451675372e-13
si:ch73-335l21.4	OK	6.67872445780841e-185	28.9756012870079	0.169339888777058	si:ch73-335l21.4	2.25645476324527e-183
her8a	OK	1.74081994876387e-37	12.7413838102266	0.0740348787371821	her8a	1.84604971639431e-36
tnnt3b	OK	0.00170563143075287	2.92802165438656	0.0167076507402958	tnnt3b	0.00530897371958575
chrnb1l	OK	4.26392152104111e-08	5.35558842048729	0.0310100122065296	chrnb1l	2.04304756519456e-07
si:ch73-335l21.2	OK	1.11800278834661e-11	6.68971832841582	0.0313125252102866	si:ch73-335l21.2	6.4326857702688e-11
slc9a5	OK	2.71365276450998e-247	33.5650685169034	0.196247158364129	slc9a5	1.27873235250941e-245
dvl2	OK	1.60415726582844e-43	13.7833930021294	0.0802373063164563	dvl2	1.86957780088578e-42
ciao2b	OK	4.37728403702207e-05	3.922745314962	0.0226091391881718	ciao2b	0.000165436655395909
hsd17b12b	OK	0.000202058697538547	3.53738024998543	0.0204053807824868	hsd17b12b	0.000710735160459355
slc39a13	OK	4.01325744477742e-57	15.8851816116348	0.0926286724275261	slc39a13	5.44712240839876e-56
e2f8	OK	3.0417130062253e-09	5.81444808779386	0.0318687202209886	e2f8	1.55967893951855e-08
si:ch211-150g13.3	OK	1.61327690752203e-09	5.91963577090998	0.0342597316878973	si:ch211-150g13.3	8.39942654094908e-09
scube2	OK	1.71441288685193e-05	4.14293939618986	0.0236736722772121	scube2	6.74703558249469e-05
mpdu1b	OK	0.000642445007772181	3.21933339421606	0.0184501987267451	mpdu1b	0.00212360942772162
ttc17	OK	4.88090469579338e-06	4.42238326493595	0.0255870544577562	ttc17	2.01794791910315e-05
jac2	OK	0.0127401459625201	2.23404226993252	0.0120519356484497	jac2	0.0339227529617012
VSTM2B	OK	2.40444964623049e-211	31.0036788634577	0.181085186810509	VSTM2B	9.44782886855051e-210
si:ch211-1o7.2	OK	3.24630095101174e-06	4.50967825869464	0.0259000033958923	si:ch211-1o7.2	1.35658473980519e-05
chrna7	OK	0	56.2205252835861	0.327102985072229	chrna7	0
uqcrfs1	OK	7.68039575859183e-58	15.9885321241913	0.0934420782541762	uqcrfs1	1.04926344017514e-56
plekhg4	OK	1.15872497331846e-34	12.2238830791152	0.0712250812105609	plekhg4	1.182257889952e-33
myo1ea	OK	1.0315494415765e-17	8.49018417162122	0.0494376279752491	myo1ea	7.28243113232365e-17
neo1a	OK	0	39.9444881377186	0.233933513626117	neo1a	0
BX511025.1	OK	0.0125892415275243	2.23865330416586	0.0124808288391633	BX511025.1	0.0335672937517025
rbm33a	OK	7.81886056324939e-06	4.31950832325831	0.0250063751453967	rbm33a	3.17426745684371e-05
ndufs2	OK	9.68697500274025e-35	12.2384319097369	0.0714258220346038	ndufs2	9.89982781670181e-34
gabarapb	OK	3.1307149819663e-41	13.3974051257788	0.0782523965642572	gabarapb	3.53212843757485e-40
rps17	OK	1.31433133559715e-89	20.0368539413369	0.117127027933471	rps17	2.40503447095511e-88
si:cabz01007794.1	OK	5.90528664216176e-17	8.28500337800079	0.0465826707695915	si:cabz01007794.1	4.07261707929445e-16
orc6	OK	0.0194884989346565	2.06442964778074	0.0113666222937736	orc6	0.0496905186933385
nedd8	OK	2.2815527967951e-06	4.58393297502235	0.0265159095444756	nedd8	9.64523559238725e-06
cnep1r1	OK	6.22115562753494e-05	3.83724344495825	0.0221366266521847	cnep1r1	0.000231632482439735
insig1	OK	7.52664024149574e-25	10.2267192325271	0.0596283595537322	insig1	6.3917799530507e-24
eif4a1a	OK	2.54169895611558e-07	5.02313804547479	0.0291340859926537	eif4a1a	1.15451804911871e-06
si:dkey-151p11.2	OK	1.16949550069781e-31	11.6483665795832	0.0678205201411465	si:dkey-151p11.2	1.13768268168387e-30
tln2a	OK	0.00256607667326916	2.79861976188728	0.0160682883179821	tln2a	0.00775515082847311
slc7a8a	OK	2.90509337451359e-07	4.99742186831823	0.0287662540826277	slc7a8a	1.31197596479339e-06
csnk1g1	OK	0.0123946485784521	2.24467043831368	0.0128505541813574	csnk1g1	0.0331083052970927
slc7a6os	OK	3.22197658272228e-17	8.35680528345089	0.0486229579140167	slc7a6os	2.23682445173815e-16
mtmr10	OK	1.01160869486691e-05	4.26231305309274	0.0246544363983152	mtmr10	4.07259007091994e-05
sdcbp	OK	2.71019279746991e-13	7.21432074827797	0.0419234801825596	sdcbp	1.66198197748956e-12
nav2a	OK	1.0277126498787e-18	8.75420755658883	0.0509939436753771	nav2a	7.44401283438574e-18
ano5b	OK	0.00726886605351777	2.44369447308927	0.013976910559327	ano5b	0.020403449008581
kirrel1a	OK	9.59314683294821e-82	19.1143314382716	0.111532510881665	kirrel1a	1.63599046228013e-80
spata6l	OK	2.17385005565804e-21	9.42386794898314	0.0548697386798488	spata6l	1.70035092184996e-20
sdr16c5b	OK	2.48949326799978e-09	5.84787293169329	0.0338775515899569	sdr16c5b	1.280975097198e-08
il13ra1	OK	0.00156606976948099	2.954462758577	0.0168753920301996	il13ra1	0.00489829108560436
katnb1	OK	0.0106958799846802	2.30099771973485	0.0131666458984248	katnb1	0.0289500124525964
hypk	OK	1.18130188533934e-13	7.32648911337538	0.0426174383259918	hypk	7.33202697785885e-13
tead1b	OK	2.54128271371163e-68	17.4277279391071	0.101880095095488	tead1b	3.84474449909698e-67
arl2	OK	0.00807710261747202	2.40541283303035	0.0137563474307751	arl2	0.0224559039056678
chchd7	OK	2.35856106294427e-07	5.03747537977864	0.0291225929620008	chchd7	1.07366564893681e-06
vax2	OK	5.52398383406576e-05	3.86634267487257	0.0214703387226413	vax2	0.000206780275849178
nfatc3a	OK	1.56174311769096e-125	23.8028080141176	0.139282476741221	nfatc3a	3.70400550779513e-124
plag1	OK	0.000667402351137992	3.20838976015069	0.0181033248547037	plag1	0.00220001440377098
pacsin3	OK	0.00217313808158955	2.8518708036429	0.0164103882374292	pacsin3	0.00665669581712714
dock11	OK	0.00268617527352791	2.78381597651228	0.0158272417966672	dock11	0.00809371729952778
tssc4	OK	3.33072411338486e-13	7.18621016070877	0.0417870250442863	tssc4	2.03603810774067e-12
si:dkey-23i12.7	OK	7.67930376582118e-05	3.78519827614432	0.0214604836530193	si:dkey-23i12.7	0.000283023325647414
htatip2	OK	0.000695771942102891	3.19639930400744	0.0184135606506341	htatip2	0.00228721568536289
ppp2r5b	OK	2.14983133141935e-08	5.47807978450253	0.031346257686482	ppp2r5b	1.0503629243296e-07
ddx28	OK	0.000425494701288448	3.33565421382923	0.018333999888662	ddx28	0.00144047625477381
puf60b	OK	0.00738628676470089	2.43790701154545	0.0139592982995895	puf60b	0.0207005950703507
apba2b	OK	1.28363409453643e-28	11.0358103091751	0.0640079401982645	apba2b	1.18003018393597e-27
tnk1	OK	0.0190945609879367	2.07281905946675	0.0116723190671435	tnk1	0.0488002395154027
atg13	OK	0.00052921275511715	3.27451758577313	0.018863440499735	atg13	0.00176773278588033
fgf3	OK	3.19358736799688e-06	4.51315022345366	0.0259530123824167	fgf3	1.3347789551236e-05
snrpa1	OK	0.000251408355144417	3.47925136628804	0.0200453777401626	snrpa1	0.000875719890942809
C7H16orf87	OK	1.6395548482671e-23	9.92383454742248	0.0578537648036487	C7H16orf87	1.34672347612084e-22
slc7a10a	OK	0.00148291456664625	2.97125758369356	0.0170368289225216	slc7a10a	0.00465621058006698
ponzr6	OK	4.24503495587499e-05	3.93012786864666	0.0205074643454589	ponzr6	0.000160559416579406
snrpf	OK	1.39293232547531e-63	16.7921460475143	0.0980665498390466	snrpf	2.01264671281502e-62
si:dkey-201l21.2	OK	0.000217005671021209	3.5184892850787	-3.93839501410323e-17	si:dkey-201l21.2	0.000761174642063898
ccdc102a	OK	7.66272879371456e-169	27.6716412304136	0.161969309378159	ccdc102a	2.35124783512399e-167
si:ch211-15b10.6	OK	4.27345597898025e-10	6.13442245712086	0.0354538221177973	si:ch211-15b10.6	2.29206820575644e-09
zgc:101765	OK	0.0154217540082681	2.15908583968975	0.0119823367121462	zgc:101765	0.0403052492945448
slc6a5	OK	0.0156623026841406	2.15292459268271	0.0119788725828322	slc6a5	0.0408955594197187
otog	OK	0	68.7913431825837	0.403012567487425	otog	0
ptgr1	OK	0.000500639590139951	3.29016705603839	0.0189320093515056	ptgr1	0.00167698207979936
phf21aa	OK	0.00832314730566967	2.3944283686034	0.0136998660540093	phf21aa	0.0230683228088262
tpma	OK	7.13187555654388e-10	6.05247458148968	0.0348560524059984	tpma	3.77510532785048e-09
CU467822.2	OK	2.38304817277967e-77	18.5788499631114	0.108160157864272	CU467822.2	3.90461664336036e-76
zgc:110699	OK	0.00512303572728059	2.56741226381545	-8.32999527347217e-05	zgc:110699	0.0147636949818596
ccnd1	OK	1.04788575373963e-11	6.69919056104952	0.0388354371150007	ccnd1	6.03340559496988e-11
wdr93	OK	2.72361914639077e-10	6.20564683618244	0.0360309845627603	wdr93	1.47501422296112e-09
tjp1a	OK	4.59458375942418e-08	5.34206897340439	0.031012657450947	tjp1a	2.19728386617712e-07
ano9b	OK	0.000477777778416388	3.30329573724626	0.0184704036296789	ano9b	0.00160533589694685
plscr3b	OK	6.64794074092093e-07	4.83527930411435	0.0276893477508598	plscr3b	2.9294643423123e-06
rhpn2	OK	7.86267877552955e-20	9.03959483976856	0.0526813100304126	rhpn2	5.91032966188157e-19
rbm4.3	OK	2.36847589269565e-17	8.3930487224987	0.0488762928116786	rbm4.3	1.65206795086219e-16
gpt2	OK	3.18246676535401e-40	13.2241540248308	0.0770936969148451	gpt2	3.5317069207906e-39
dhx15	OK	0.000146649834873669	3.62114711110729	0.0209115974314465	dhx15	0.000524969971504784
per1b	OK	6.4698481916926e-221	31.7057636268633	0.185628590324731	per1b	2.67644594583402e-219
atp6v0d1	OK	3.0011432278712e-32	11.7637298517065	0.0686355987906902	atp6v0d1	2.95621452178794e-31
chmp5b	OK	0.0011204134682183	3.0563056574176	0.0175936071728872	chmp5b	0.00358215090355369
znf536	OK	0	64.9425224852261	0.38057865131539	znf536	0
rbm4.2	OK	6.52706313408516e-06	4.35919582297956	0.0252410556310206	rbm4.2	2.67058830926034e-05
slc22a18	OK	0.0191248984659771	2.07216778132049	0.0117879457085745	slc22a18	0.0488628291524235
pkp3b	OK	5.62167462017359e-14	7.42540717932657	0.0432345402796987	pkp3b	3.53295966540817e-13
si:ch211-212k18.6	OK	4.43590789280256e-29	11.130916928727	0.0643772987635118	si:ch211-212k18.6	4.1080079410664e-28
tshz3b	OK	5.28091764025398e-19	8.82899721429114	0.0512576859366439	tshz3b	3.86645222907497e-18
CT476811.1	OK	0.00365857433537889	2.68205473490939	0.0153278406931198	CT476811.1	0.0108322664478107
cd81a	OK	2.09679078139548e-197	29.9516017064945	0.175277731722394	cd81a	7.62909261230818e-196
dnaaf1	OK	0.0110946840589401	2.28711060372079	0.0130262055441522	dnaaf1	0.0299518236779635
selenos	OK	0.000281155822295436	3.44917044457754	0.0198872349710583	selenos	0.000973118225752351
zdhhc1	OK	0.0082878778264834	2.39598528722867	0.0136729879225453	zdhhc1	0.0229868129920554
rbm4.1	OK	0.0104980670776382	2.30805398336957	0.0131819103267631	rbm4.1	0.028473011313352
myzap	OK	1.82462174200594e-19	8.94710582920703	0.0521309648310792	myzap	1.3577157153561e-18
mrps11	OK	0.00655897524048452	2.48055097738832	0.0141986588493158	mrps11	0.0185709227810827
hsbp1a	OK	1.32619295716074e-73	18.1101057225485	0.105681773665424	hsbp1a	2.10021043860155e-72
chsy1	OK	7.88468566458064e-81	19.0041114668033	0.11113762684196	chsy1	1.34007583000252e-79
si:ch211-285c6.6	OK	0.00238067440124899	2.82275131773634	0.0157562990269987	si:ch211-285c6.6	0.00723934092247829
creb3l1	OK	3.93767444608442e-136	24.805216031167	0.144706640785914	creb3l1	9.86149457431471e-135
lrrk1	OK	0.000350266500938902	3.38937045513809	0.0195213527481885	lrrk1	0.00119776714118638
exoc6b	OK	3.96227435713759e-57	15.8859832804458	0.0928088808598123	exoc6b	5.3808372621388e-56
si:ch211-186j3.3	OK	0.00632318917130575	2.49357522665557	0.0139777176283573	si:ch211-186j3.3	0.0179641919011178
cd82a	OK	2.89104656935024e-08	5.42541224850952	0.0314685662998897	cd82a	1.39914375380388e-07
dnaja2a	OK	1.30198333210317e-09	5.95479585405259	0.0345512205071867	dnaja2a	6.80413178079934e-09
tp53i11a	OK	2.98049417577242e-24	10.0925349752649	0.0587911816458896	tp53i11a	2.4906002830813e-23
tppp3	OK	2.02229676475231e-05	4.10491741039098	0.0233307245614809	tppp3	7.90287725574055e-05
PAQR9	OK	9.41695526176458e-22	9.51127537855103	0.0553753614145367	PAQR9	7.42837166322141e-21
ostc	OK	5.41168447270333e-05	3.87135126812405	0.0223587389704435	ostc	0.000202879494610737
ptprja	OK	0.000222456507432118	3.51190140934829	0.0199008728491278	ptprja	0.000779312770376715
aldh1a3	OK	4.49564791443716e-111	22.3631613288964	0.130780755846244	aldh1a3	9.64909225745078e-110
dok1b	OK	0.000235658907902494	3.49654906170759	0.0200823039868512	dok1b	0.000823147995291573
galnt18b	OK	2.18649160333064e-152	26.268683860369	0.153758271306504	galnt18b	5.97744362092648e-151
cep89	OK	0.0159412428381311	2.14588085421418	0.0122366960945252	cep89	0.0415286092956458
si:dkey-19b23.13	OK	1.1803759787956e-215	31.3217398717119	0.183326861541776	si:dkey-19b23.13	4.7573706450847e-214
nat8l	OK	4.1861478613617e-18	8.59436985447851	0.049554129286012	nat8l	2.98811334671061e-17
ankrd46b	OK	4.84659194397178e-06	4.4239068242949	0.0246306362956212	ankrd46b	2.00427603832776e-05
scrib	OK	7.3096926933546e-07	4.81636928897774	0.0279328486012001	scrib	3.21485414262643e-06
cgnl1	OK	5.47331763018003e-21	9.32645962340222	0.0541843268090494	cgnl1	4.22967323276767e-20
si:dkey-19b23.12	OK	0.000106416309900686	3.70327658550943	0.021211354174874	si:dkey-19b23.12	0.000386406499551026
dpy19l3	OK	1.87409414165231e-40	13.2639124941321	0.077461556022221	dpy19l3	2.08807404609252e-39
fam189a1	OK	3.88818111707221e-33	11.9349949374879	0.0694954028319595	fam189a1	3.8833789810312e-32
col4a6	OK	0	41.0212309784163	0.240041758158219	col4a6	0
cyp26b1	OK	7.44910644976608e-37	12.6274751863167	0.0735025790360635	cyp26b1	7.8101902797652e-36
si:dkey-172h23.2	OK	2.14045639009072e-91	20.240808231433	0.118369728962334	si:dkey-172h23.2	3.96300600023517e-90
si:dkey-19b23.14	OK	0.0151050089472877	2.16732583536351	0.0118991091971673	si:dkey-19b23.14	0.0395475163759327
kif9	OK	1.67146901888069e-21	9.4514109203922	0.0550409718462633	kif9	1.31148847681753e-20
ptpn5	OK	1.20853870953219e-21	9.4852909911668	0.0551685790756357	ptpn5	9.5093712835099e-21
tmem176l.3b	OK	1.12834034597421e-06	4.72896428804474	0.0262327033590177	tmem176l.3b	4.90061748669916e-06
dgkza	OK	5.30730815758316e-114	22.6620408706101	0.132563210384344	dgkza	1.16505173557314e-112
zgc:103586	OK	5.622117453814e-45	14.0231913419671	0.0818305801575957	zgc:103586	6.69871019247449e-44
CAPN1	OK	0.000100112109236191	3.71873342163399	0.0207239432311081	CAPN1	0.000364518586266097
kcnc1a	OK	7.37401629248531e-20	9.04660652600838	0.0515957406743706	kcnc1a	5.55132776085028e-19
slc3a2a	OK	0.00029257963477437	3.43840155082232	0.0197700182996386	slc3a2a	0.00101042552199458
mrvi1	OK	0	43.4490031759242	0.252589466900163	mrvi1	0
phkb	OK	5.80819401371504e-16	8.00844924914142	0.0466388956966332	phkb	3.9057300356712e-15
lyve1a	OK	0.00227518431182419	2.83725196820317	0.0138386039931171	lyve1a	0.00694129189644891
si:ch211-186j3.6	OK	8.36781960314934e-58	15.9831904858301	0.0931836952118337	si:ch211-186j3.6	1.14255375616204e-56
casc4	OK	2.8593682935129e-10	6.1979938745044	0.0360096760512119	casc4	1.54752814659056e-09
zgc:158564	OK	4.10572245447321e-23	9.83182808969673	0.0573335275540635	zgc:158564	3.34502295128985e-22
dysf	OK	1.60364565140545e-05	4.15822564626582	0.0236568453548244	dysf	6.33298563879698e-05
tspan18a	OK	0.00625616574727749	2.49735587862678	0.0143057846276998	tspan18a	0.0177818389023242
rpl34	OK	3.57019212334002e-137	24.9016489237325	0.145733899638917	rpl34	9.00413947082605e-136
ampd3a	OK	2.03804675539049e-16	8.13627974996182	0.0472622481271951	ampd3a	1.38535233489382e-15
zfand6	OK	0.0137038066934928	2.20566287167175	0.0125970404754346	zfand6	0.0362729099355054
pygmb	OK	2.67591856611079e-146	25.730332954263	0.150557341060033	pygmb	7.12129538575704e-145
isl2b	OK	2.278645198985e-34	12.1688007199985	0.0706782503705286	isl2b	2.31737754536937e-33
slc6a2	OK	0.000178873779422288	3.5694382272374	0.0188397463453124	slc6a2	0.00063335971417194
col4a5	OK	9.08695615237657e-74	18.1309062721321	0.105765686788581	col4a5	1.44086593158715e-72
gfod2	OK	5.23374942081347e-06	4.40728381950169	0.0252860633125387	gfod2	2.15868483432664e-05
mns1	OK	3.15371813179952e-07	4.9815580318994	0.0288275337800135	mns1	1.42025206008131e-06
galns	OK	0.0128921578039507	2.22944492973509	0.0126869630307143	galns	0.0342983661240835
si:ch211-212k18.9	OK	3.61172353951216e-05	3.96880331648251	0.0226126131189087	si:ch211-212k18.9	0.000137549146324174
nitr3b	OK	0.000605193580853308	3.23642101970314	0.0170830700945085	nitr3b	0.00200815325988241
sbf2	OK	6.01080535528883e-15	7.71581018957259	0.0449122508002111	sbf2	3.9149098324691e-14
ctdspl2b	OK	0.0195713198683391	2.06268422412948	0.0117240731994688	ctdspl2b	0.0498813966835496
actn3b	OK	7.71890895274188e-14	7.38333049141835	0.0426094121872825	actn3b	4.81955986391747e-13
tcf12	OK	2.40615679413511e-19	8.91650584975722	0.0519687046330322	tcf12	1.78250427518242e-18
tbc1d14	OK	1.43667672595165e-90	20.1467563246599	0.117791049006375	tbc1d14	2.6404727890676e-89
man2b2	OK	0.00012896617731756	3.6542524825744	0.0210236809175454	man2b2	0.000464185656737103
strc1	OK	3.45842238777966e-66	17.1444345362118	0.0995768239061432	strc1	5.13925256901295e-65
ext2	OK	0.00202095276267818	2.87487259954543	0.0165133919666804	ext2	0.00623181058525071
cd99l2	OK	3.80917939166542e-140	25.1745171444155	0.147028802257531	cd99l2	9.78404899279307e-139
emilin2b	OK	8.07935891047251e-07	4.79634463493105	0.0271776617014332	emilin2b	3.5458937066988e-06
mmp2	OK	0.000121591702085855	3.66933377193566	0.0211094034438831	mmp2	0.000438713641276671
adamts18	OK	1.29146784885042e-166	27.4859750518901	0.160015179683828	adamts18	3.8819913072939e-165
pabpn1l	OK	0.00559424013068111	2.5367563224389	0.012941020376986	pabpn1l	0.0160221644962921
hspa12b	OK	6.69253762159071e-08	5.27349383492929	0.0298468161928525	hspa12b	3.16497313027084e-07
mdka	OK	2.50293210461118e-20	9.16389182871126	0.0533157713715432	mdka	1.90543592257813e-19
myom1b	OK	0.000151469296159919	3.61277411190129	0.0204289149024167	myom1b	0.000541063520295385
arnt2	OK	6.85798567632629e-110	22.2412251887528	0.130137386906885	arnt2	1.46192893639306e-108
clcn5b	OK	2.37438624111496e-05	4.0676593938678	0.0234125899280052	clcn5b	9.21558889588339e-05
BX005003.1	OK	0	64.1660856541306	0.37602991125988	BX005003.1	0
si:dkey-19b23.7	OK	0.00210565928446367	2.86188336162628	0.0163814239497448	si:dkey-19b23.7	0.00647055315055403
cct7	OK	1.34899480229428e-28	11.0313451900753	0.0643489817878212	cct7	1.23875277284671e-27
ccl36.1	OK	0.0022436059190401	2.84171120826416	0.0160036110315595	ccl36.1	0.00685162099944162
eif3jb	OK	4.88782135925023e-23	9.81425599965055	0.0572067703995655	eif3jb	3.97962954384684e-22
TESK1	OK	1.2482713713113e-44	13.9664829520689	0.0815371384501176	TESK1	1.47817265032607e-43
myl12.1	OK	3.63556561598818e-15	7.77967463002468	0.0452872869040054	myl12.1	2.38025579595737e-14
zgc:195077	OK	0.0150809394409295	2.16795804434368	-0.000118286096714476	zgc:195077	0.0394968732602392
si:ch211-212k18.5	OK	8.33632397735719e-33	11.871364199385	0.0686434460394489	si:ch211-212k18.5	8.27656656587594e-32
si:dkey-19b23.8	OK	4.38159249229511e-32	11.7317462892206	0.0682389181766582	si:dkey-19b23.8	4.30247325457682e-31
ENSDARG00000075140	OK	0.00177758294276391	2.9151509095869	0.0167119730139648	ENSDARG00000075140	0.00552264553131099
tnfsf10l	OK	8.81540177244159e-08	5.2227261473006	0.030167568626967	tnfsf10l	4.14155373001008e-07
ltb4r2a	OK	6.47390608219396e-07	4.84055330079023	0.0264101357398018	ltb4r2a	2.85779805554711e-06
si:ch211-272h9.6	OK	0.0123505892583505	2.2460441750393	-0.000111446933480854	si:ch211-272h9.6	0.0330152401490283
gal3st3	OK	0	43.2859949756138	0.253562160542319	gal3st3	0
slc7a7	OK	3.4496832538824e-05	3.97972971366841	0.0226813668287827	slc7a7	0.000131608749796953
ccdc96	OK	0.00568259337840449	2.53126524371213	0.0144766793372874	ccdc96	0.0162659206900231
BX005396.2	OK	1.46384955535895e-06	4.67582800640649	0.0268589327776516	BX005396.2	6.28746395193427e-06
si:ch211-168d1.3	OK	2.52299793987741e-63	16.7568575041825	0.0977813931130504	si:ch211-168d1.3	3.6350020318843e-62
abhd17c	OK	0.00100175923902053	3.08971024695186	0.0178011054520489	abhd17c	0.00322541771936884
spg7	OK	0.000238722917236375	3.49310103171615	0.0201438286702694	spg7	0.000833385992507826
plcb3	OK	1.61443714137445e-17	8.43797327534353	0.04911291548587	plcb3	1.13177641770459e-16
chrm4a	OK	2.75023904484306e-08	5.43432327452604	0.0311062956681793	chrm4a	1.33305766850678e-07
nsun6	OK	0.0124156583848908	2.24401685699057	0.0119404246338581	nsun6	0.0331573601843855
rbpms2b	OK	1.40546877985266e-86	19.6865694377844	0.114605612193478	rbpms2b	2.49353834693038e-85
irx5a	OK	7.49190283147025e-15	7.68767053382611	0.0445845349923157	irx5a	4.86692179533889e-14
grpel1	OK	0.0119243535114987	2.25955783496649	0.0128940041483372	grpel1	0.0319781363050664
ccnb3	OK	0.00105501650101206	3.07429129174566	0.0170656634731762	ccnb3	0.00338882495324976
cemip	OK	0.00031428660918815	3.41897577700214	0.0195143998061332	cemip	0.0010813685157477
si:ch211-276a23.5	OK	0.0140655726627058	2.19545263022087	0.0119028677841904	si:ch211-276a23.5	0.0371441947836692
acp2	OK	0.00547495776360301	2.54429311562078	0.0145359162914362	acp2	0.0157056546716746
igdcc3	OK	9.73658882269899e-57	15.8295099876113	0.0923912349177189	igdcc3	1.31512147196251e-55
cdh11	OK	1.0940854258366e-82	19.2272776748686	0.112379640055651	cdh11	1.87989222346112e-81
sorcs2	OK	2.82063243533921e-137	24.9110955107289	0.145796484840137	sorcs2	7.12088967991125e-136
pfdn2	OK	0.00306513071948537	2.74073131571809	0.0156866238214457	pfdn2	0.00917161160262337
irx3a	OK	3.21071374461852e-08	5.40665049235876	0.0312664955387744	irx3a	1.54966081755567e-07
itga11a	OK	5.3103751207948e-07	4.87977394925321	0.027976746831768	itga11a	2.35954969697279e-06
igdcc4	OK	8.39715255593371e-38	12.7981317642548	0.0747067419859121	igdcc4	8.9539862792302e-37
pkd1l2b	OK	8.21593002653214e-25	10.2182270945628	0.0586795100138714	pkd1l2b	6.96769789699372e-24
psmd7	OK	3.58584523247227e-18	8.6121276796415	0.0501343145498313	psmd7	2.56253004939702e-17
htr2cl1	OK	3.02472601842923e-23	9.86254780577117	0.0572491260724997	htr2cl1	2.47073498064524e-22
pkd1l2b.1	OK	2.26110637757316e-24	10.1196084038314	0.0579674240154828	pkd1l2b.1	1.89767913556684e-23
nucb2a	OK	8.92390316373639e-07	4.77638103103415	0.0276722979404121	nucb2a	3.90492805745693e-06
si:dkey-88n24.12	OK	0.00520560661383786	2.56186382053088	0.014225187330632	si:dkey-88n24.12	0.0149895878936712
fto	OK	5.880052381487e-13	7.10815898586849	0.0413711119263283	fto	3.55883711133505e-12
ppp1r14bb	OK	5.96874877122214e-06	4.37872623697586	0.0252291825046129	ppp1r14bb	2.45135260396081e-05
MAF1	OK	3.95446008579794e-30	11.3443751069132	0.0660554470452925	MAF1	3.74374470886966e-29
arhgap36	OK	3.27054935823375e-06	4.50809922079955	0.0255702398085253	arhgap36	1.36603468613065e-05
bean1	OK	2.47231791602537e-13	7.22681207276253	0.0418811211774327	bean1	1.51945422497769e-12
CABZ01068273.1	OK	0.00148883708142272	2.97003335480191	0.016542162534592	CABZ01068273.1	0.00467246579797023
il16	OK	2.92310150760278e-06	4.53187648899906	0.0261779624433717	il16	1.22581518390924e-05
ndrg2	OK	1.09638222945345e-67	17.3439158146216	0.101354041004862	ndrg2	1.65175517488994e-66
oaz2b	OK	2.3985505750655e-91	20.2351965309548	0.118206346486883	oaz2b	4.43758408607505e-90
cacnb2a	OK	1.80306728137314e-34	12.1878956184262	0.0708657598970823	cacnb2a	1.83595018995708e-33
nap1l4b	OK	2.74697151063858e-11	6.55689564487058	0.0381129593465891	nap1l4b	1.55483921427407e-10
clcn3	OK	5.19195986526875e-77	18.5370085973442	0.108400699612471	clcn3	8.47377876708479e-76
rps13	OK	2.37004943791106e-220	31.664828112526	0.1853967471869	rps13	9.77216601299218e-219
rtn3	OK	2.86275963324809e-31	11.5718198343884	0.0675375040604412	rtn3	2.77304950718301e-30
lrfn4b	OK	7.74017784418267e-05	3.78323431220397	0.021583504202154	lrfn4b	0.000285099204196026
zgc:109889	OK	9.58547436308392e-19	8.76206275861699	0.0509698681751029	zgc:109889	6.95106325739516e-18
pcxb	OK	4.12437715849443e-19	8.85660587174963	0.0512359082729331	pcxb	3.03208243361574e-18
nhsl2	OK	3.18317191296845e-138	24.9983807968904	0.145926622887381	nhsl2	8.10141489200061e-137
nfat5b	OK	2.19458489326233e-273	35.3082393234605	0.206724797597192	nfat5b	1.14616768102486e-271
mtbl	OK	4.19084222495669e-16	8.04849717388684	0.0466510839295873	mtbl	2.828762082322e-15
igf1rb	OK	1.9388293421258e-14	7.5650330952062	0.044049440047169	igf1rb	1.2386471146216e-13
gba2	OK	6.77398592581611e-05	3.81627825204969	0.0220363952528156	gba2	0.00025098589000042
aktip	OK	0.000963373843375951	3.10129724995755	0.0178592665915021	aktip	0.00311021492332153
si:ch211-212k18.4	OK	0.00885458740973658	2.37164336642186	0.0135925906912696	si:ch211-212k18.4	0.0244143919681793
si:dkeyp-67a8.4	OK	0.0150809394409295	2.16795804434368	-0.000118286096714476	si:dkeyp-67a8.4	0.0394968732602392
anp32a	OK	6.60484378004126e-24	10.0141466979841	0.0584057049403138	anp32a	5.48086159291143e-23
hmgb3a	OK	3.50180157842659e-34	12.1336731401837	0.0708167434371951	hmgb3a	3.54836959456654e-33
arrb2b	OK	8.38394612812953e-10	6.02637399763374	0.0349856644485618	arrb2b	4.42198917496485e-09
mex3b	OK	1.83060711552082e-09	5.89881501472425	0.0340982830237675	mex3b	9.507248762998e-09
aph1b	OK	1.2009001713805e-09	5.96799954819812	0.0346448711901629	aph1b	6.29292775843179e-09
nqo1	OK	4.49722937626135e-30	11.3331181726039	0.065811322729132	nqo1	4.25117055933242e-29
rwdd	OK	1.80271306295885e-07	5.08869148372639	0.0293832008670452	rwdd	8.27090296034321e-07
prkdc	OK	0.000378265777780062	3.3682274501901	0.0193855561528255	prkdc	0.00128911701783148
rps4x	OK	4.10513564374688e-182	28.7534118763227	0.168319897617571	rps4x	1.36487593439112e-180
ndufs3	OK	2.31298656175938e-28	10.982754931222	0.0640629118807175	ndufs3	2.10622085422252e-27
efl1	OK	0.00796538107186016	2.4104979203852	0.0138146239443951	efl1	0.022172344891235
saxo2	OK	2.29980713355402e-11	6.58335103168779	0.0382202848296227	saxo2	1.30468126343213e-10
tkfc	OK	0.0167788718300433	2.12534610705917	0.0121047070949627	tkfc	0.0434939032062202
eml3	OK	7.88074421253779e-161	26.9976192690974	0.157782748724186	eml3	2.26822476078197e-159
lrch4	OK	1.34782226540034e-32	11.8311065639286	0.0689846894415313	lrch4	1.33340790731338e-31
si:dkey-172j4.3	OK	0	63.0159514875273	0.368794025160854	si:dkey-172j4.3	0
kars1	OK	0.00144852045753514	2.97845656050417	0.0171373602359334	kars1	0.00455620569008135
glceb	OK	1.76807629311066e-63	16.7779880225245	0.0980688121461471	glceb	2.55322031059857e-62
plekha7b	OK	1.71650731971617e-80	18.9632440771832	0.110862484250123	plekha7b	2.90358448029452e-79
herc1	OK	0.00691516763089364	2.46164014662279	0.0141182346599628	herc1	0.0195001504318192
chd9	OK	1.74696535796262e-15	7.87186500141792	0.0458586715956176	chd9	1.15644770421877e-14
cited1	OK	0.00041657100186547	3.3415427004163	0.0192608678773089	cited1	0.00141236386878083
wdr60	OK	0.000292034865692794	3.43890612519603	0.0198077200001693	wdr60	0.00100882210941886
mef2ab	OK	0.00045866523311167	3.31472583728737	0.0190385535308952	mef2ab	0.00154422223057702
adamtsl3	OK	3.5647434154569e-17	8.34486568153713	0.0485826378390853	adamtsl3	2.47136484187193e-16
scamp2l	OK	1.77124417379225e-10	6.27295960657156	0.036413896174807	scamp2l	9.66339938907463e-10
hdac8	OK	8.68400976152455e-05	3.75451103287634	0.0216696767492655	hdac8	0.000318181000747821
plaa	OK	0.00828832725902655	2.39596541112951	0.0136762752897015	plaa	0.0229868129920554
shroom4	OK	2.909679267824e-22	9.63267650729999	0.0559961427364812	shroom4	2.32375755224848e-21
sox6	OK	0	53.3292074400294	0.312355073855502	sox6	0
rbpjb	OK	3.9206079975764e-21	9.36176969148003	0.054573650488889	rbpjb	3.04384397309516e-20
zgc:92429	OK	1.40766180195111e-05	4.18791221853464	0.0224891106933816	zgc:92429	5.5942729412036e-05
sema4bb	OK	4.03165142077178e-07	4.93382902844272	0.0285246874789276	sema4bb	1.80481195477371e-06
BX322787.1	OK	0.0021242146077243	2.85910142858269	0.015654415198824	BX322787.1	0.00652357417628819
ncapg2	OK	0.00620454248218913	2.50029236810979	0.0134290841057291	ncapg2	0.0176491178356972
mta2	OK	0.000777582739381857	3.16418754318762	0.0182346552361458	mta2	0.00253784945886783
tle3b	OK	0.000895280613298315	3.12293691479431	0.0179617105745925	tle3b	0.00290121376612919
hdac8.1	OK	3.48905805585026e-09	5.79145041564892	0.0335719360201436	hdac8.1	1.78358883364825e-08
tox3	OK	5.36743836179117e-131	24.3247273972448	0.142333551078893	tox3	1.30257804735472e-129
otub1b	OK	2.60036917976794e-05	4.04641776323194	0.0233605628686247	otub1b	0.000100367444137956
npsn	OK	0.0102242927030451	2.31801353624913	-0.000105143506678025	npsn	0.0278087006371528
mus81	OK	0.000395319556370101	3.35605126595718	0.0184068105806563	mus81	0.00134412938541192
cdkn1ca	OK	3.6953890152956e-24	10.0714140018348	0.0585940362956292	cdkn1ca	3.08080170350667e-23
serf2	OK	1.42163854936192e-29	11.2318908869425	0.065557908798511	serf2	1.32882389239202e-28
alox12	OK	8.28283320614505e-11	6.39021131894609	0.036882567583532	alox12	4.59690824983064e-10
trpm5	OK	5.29291844326165e-06	4.40484740220328	0.0245141424010707	trpm5	2.18165360825594e-05
fth1a	OK	7.30307737406841e-33	11.8824283463339	0.0693779084937496	fth1a	7.26511296390956e-32
rpl13	OK	2.4640722694772e-178	28.4496055027083	0.166539991366554	rpl13	8.0327474282866e-177
rnaseka	OK	0.000652971159424461	3.21467072209361	0.0184734787883835	rnaseka	0.00215556149533998
ywhae2	OK	1.37626975999214e-06	4.68847097064267	0.0271492277763949	ywhae2	5.92609182639007e-06
rplp2l	OK	3.06339587091918e-264	34.7072391649864	0.203229480841522	rplp2l	1.5390034286187e-262
kcnk7	OK	1.27575344813644e-14	7.61925160772722	0.0442177624288512	kcnk7	8.20813622215034e-14
si:dkey-6n21.12	OK	0.000142379371291213	3.62878456896993	0.020623099515358	si:dkey-6n21.12	0.000510411620034237
si:ch211-200p22.4	OK	0.000108302794513764	3.6988183015394	0.0213646527567	si:ch211-200p22.4	0.000392971885318503
slc25a22b	OK	0	69.5288206720811	0.40702749537773	slc25a22b	0
sall1a	OK	6.70635276559584e-207	30.6720950389713	0.179304392312288	sall1a	2.55892781553611e-205
cyp2r1	OK	0.00993963784244994	2.3286186778802	0.0131445937056888	cyp2r1	0.0271463973278546
ache	OK	1.30271328665966e-19	8.9842340599495	0.052215267669095	ache	9.73404452556514e-19
ppip5k1a	OK	2.21925162254984e-11	6.58864778258671	0.0383120083093748	ppip5k1a	1.26012273897399e-10
CT030153.1	OK	0.00464200950796585	2.60141455164504	0.0147188699890137	CT030153.1	0.0134953654592596
uacab	OK	3.09985250279674e-09	5.81127977953315	0.0337045105523184	uacab	1.58851599330767e-08
mybpc3	OK	2.82202996028279e-71	17.81258622702	0.103677401540311	mybpc3	4.37781368034216e-70
rab8b	OK	1.76924410161506e-07	5.09224479957304	0.0294688009721008	rab8b	8.12249328393373e-07
cylda	OK	0.00045502681610344	3.31695165237733	0.0191281021486943	cylda	0.0015334140681405
cmtm4	OK	7.40576188675731e-64	16.8295935914901	0.098347546056984	cmtm4	1.07315054762497e-62
dync1li2	OK	8.12875781279954e-05	3.77102995183708	0.0217725792394639	dync1li2	0.000298578504921717
mfge8a	OK	7.54984023947815e-41	13.3319027021908	0.077735891443052	mfge8a	8.45319093182125e-40
tollip	OK	0.000180942467053596	3.56642455174704	0.0205563081932354	tollip	0.000640322798781281
ptprn2	OK	7.00462220282969e-204	30.4448635048868	0.178065193515041	ptprn2	2.64058457146974e-202
pias1a	OK	0.0117483325549668	2.26526104378688	0.0129594952110964	pias1a	0.0315634925324684
ehbp1l1a	OK	4.5941642060753e-06	4.43544266669645	0.0256704300165297	ehbp1l1a	1.90176853504131e-05
pde3b	OK	1.36642886276132e-56	15.8081710946579	0.0924077136866217	pde3b	1.84265762025624e-55
cpt1aa	OK	0.000383307358656182	3.36457562582367	0.0193741469536572	cpt1aa	0.00130505665817626
dnah2	OK	7.12970173331772e-113	22.5473427663114	0.131911357388801	dnah2	1.54882576042064e-111
rab39bb	OK	0.0151284064263621	2.16671210703369	0.0123246532361394	rab39bb	0.0396005033624802
vbp1	OK	0.00166107785410157	2.93624150554475	0.0168478003562614	vbp1	0.00517865448631666
nat16	OK	1.43413794636096e-79	18.8512781912629	0.110236828599121	nat16	2.40002698112969e-78
skor1a	OK	0	42.2611268253043	0.247429103175874	skor1a	0
copb1	OK	5.01507144040162e-16	8.02648948153828	0.0467430397052667	copb1	3.37692253396262e-15
nkd1	OK	2.78463372687142e-13	7.21063225531294	0.0417532826824793	nkd1	1.70721405964636e-12
si:ch211-196f2.6	OK	3.02196170338873e-06	4.52484692712507	0.0238374718223577	si:ch211-196f2.6	1.26579044180872e-05
si:ch211-288d18.1	OK	1.28943237176135e-73	18.1116531554541	0.105827095709914	si:ch211-288d18.1	2.04328572235684e-72
rras2	OK	0.00119498076750149	3.03693605075344	0.0174312466412229	rras2	0.00380443750765884
syt4	OK	3.26551676433414e-07	4.97481395227161	0.0276079832200605	syt4	1.46892588848183e-06
mark2b	OK	6.55194203240405e-27	10.6765592438373	0.0622711263651201	mark2b	5.78958881953955e-26
map2k5	OK	0.00764728965035295	2.42532757257061	0.0139020754420113	map2k5	0.0213723416103342
tub	OK	9.68436742220302e-162	27.075057197388	0.158459298395396	tub	2.81317968606266e-160
b4galnt4b	OK	8.40676508353008e-23	9.75940708916701	0.0568021860945818	b4galnt4b	6.81595064291771e-22
BX072554.1	OK	0.0177638844528542	2.10229126934326	0.0118811003724691	BX072554.1	0.0457680184325388
lmo1	OK	3.72148480459042e-33	11.9386405884292	0.0695844814811952	lmo1	3.71836997075636e-32
smad3a	OK	0.000332508841016637	3.4036094339152	0.0196231502071601	smad3a	0.00114077790275709
ap1s1	OK	5.024792942102e-120	23.2649136215481	0.136046982876231	ap1s1	1.15353969107651e-118
lin7c	OK	0.000488071936320899	3.29731376233226	0.0189937011309097	lin7c	0.00163619622514424
brsk2b	OK	5.3920816390148e-107	21.9400253211947	0.128309684017218	brsk2b	1.12084655562572e-105
kdm6ba	OK	7.78437162672557e-30	11.2849740991426	0.0658630130431225	kdm6ba	7.31159281792369e-29
map1aa	OK	1.53598578957926e-09	5.92770530354663	0.0343035152307594	map1aa	8.00532801641634e-09
znf609b	OK	1.0179939420605e-36	12.6028700288804	0.0735880235930755	znf609b	1.0646679238012e-35
zgc:153993	OK	0.00732015932608367	2.44115625484793	0.0139311385069242	zgc:153993	0.020535930410205
CR356242.1	OK	0	53.1902287470749	0.311405414458486	CR356242.1	0
mical2a	OK	0.0096480858258564	2.33975929688287	0.0128926732379053	mical2a	0.0264220956487212
iqgap1	OK	1.33882164598615e-54	15.5166261397144	0.0904889708749964	iqgap1	1.76926303865191e-53
gigyf1a	OK	0.0134589868306884	2.21270524350657	0.0126496931522186	gigyf1a	0.0356700857234936
serpinh2	OK	0.01445690670164	2.18465961428736	0.0124134935430198	serpinh2	0.0380733474213061
cldnd1a	OK	0.0144608131036943	2.18455315019006	0.012390197708974	cldnd1a	0.0380796348420707
peli3	OK	2.45789604597959e-19	8.91414847288279	0.0519114043971306	peli3	1.82029530211706e-18
USP53	OK	1.53894968553709e-07	5.1186135306002	0.0296332063349918	USP53	7.10888698484049e-07
SEMA4F	OK	3.569584179824e-26	10.5179746618915	0.0613417434717313	SEMA4F	3.11363624926958e-25
phlpp2	OK	8.88556029821174e-15	7.66580630875757	0.0445103893654868	phlpp2	5.75586850428605e-14
myo9aa	OK	1.1926788458484e-166	27.4888662880055	0.160743446403157	myo9aa	3.58934765745181e-165
ankrd11	OK	7.15495849372766e-38	12.8105594175907	0.0748258989961409	ankrd11	7.64568007157965e-37
kcng4b	OK	2.93553545570919e-43	13.7397097227135	0.0790054175672286	kcng4b	3.40383618590073e-42
BX664603.1	OK	0.000165877021985011	3.58915304466371	0.0205480293805204	BX664603.1	0.000590090969794557
dkk3a	OK	0.0132076942702374	2.22004978174392	0.0116188478797682	dkk3a	0.0350634001546735
zgc:173587	OK	4.83578443454178e-07	4.89820584330125	0.027992733569171	zgc:173587	2.15440341193403e-06
abhd2a	OK	3.39444262642725e-31	11.5571968800954	0.0674166789445509	abhd2a	3.28299699853027e-30
nwd2	OK	0.000122769033703011	3.66686945328633	0.0206985224705113	nwd2	0.00044283408717997
rnf166	OK	0.000283257156484737	3.4471593593594	0.0198769963210386	rnf166	0.000979850097408012
efnb3b	OK	1.25169889760557e-121	23.4228022010103	0.13686446829582	efnb3b	2.9054481170439e-120
tpcn2	OK	0.00188359339981704	2.89702587767944	0.0162551079922149	tpcn2	0.00583104506544992
ap1g1	OK	1.44218113817811e-07	5.13085030739668	0.0297642818306453	ap1g1	6.67787937809145e-07
nsmaf	OK	8.47356127053054e-05	3.76065175500745	0.0217159403138694	nsmaf	0.000310788160191558
mtss1lb	OK	1.60203523542398e-07	5.11103002747773	0.0296322272228845	mtss1lb	7.38940594606143e-07
rnf32	OK	6.91352301215136e-14	7.39798116166666	0.0429806369843575	rnf32	4.32638812759916e-13
fis1	OK	1.22037677486286e-12	7.00665946072728	0.0407234447684602	fis1	7.28593126197597e-12
slc39a1	OK	6.86363643860029e-08	5.26886117478715	0.0303679908021795	slc39a1	3.24099645656942e-07
CU179759.2	OK	0.000219430187877074	3.51554016252215	0.0194062831571923	CU179759.2	0.000769355997187465
FO704772.3	OK	1.07872058282302e-26	10.6301590990638	0.0619794729989432	FO704772.3	9.49857614709882e-26
gramd2aa	OK	1.34406074367539e-282	35.9035583636915	0.210207952760234	gramd2aa	7.1842769260551e-281
FP236812.1	OK	0.000106210498235728	3.70376745697386	0.0207597190162106	FP236812.1	0.000385770933102211
caap1	OK	0.000606160791337775	3.235965211437	0.0185835627016054	caap1	0.00201083033982357
zgc:56231	OK	0.012985025019042	2.22665933665787	0.0123190239996162	zgc:56231	0.0345271099069119
chd3	OK	2.40778021400933e-06	4.57266660623504	0.0264703478712328	chd3	1.01583039692023e-05
smim20	OK	0.000341535546758461	3.39628534862138	0.0195698163056815	smim20	0.00116966593192457
dennd4c	OK	6.91337901502461e-06	4.34659436577908	0.0251659533563568	dennd4c	2.82312263442991e-05
strc	OK	0	101.553469364386	0.595315820185348	strc	0
sec24d	OK	8.77191012368149e-09	5.63462644237536	0.0326630364542942	sec24d	4.39191162154127e-08
mtm1	OK	0.00385310813415658	2.66467760145645	0.0152545797830071	mtm1	0.0113559332018777
dennd5a	OK	0.0124810077420958	2.2419900484417	0.0128307471160704	dennd5a	0.0333105911941446
ppargc1a	OK	0.000541532140503857	3.26801028929915	0.0187428175126789	ppargc1a	0.00180719771436251
ntrk3b	OK	5.91544458813677e-10	6.08251897254168	0.0350633779841904	ntrk3b	3.14783019274041e-09
ADAMTS7	OK	0.0124115438514479	2.24414477804819	0.0122561002067132	ADAMTS7	0.0331499033466811
ccdc149a	OK	6.62427058503217e-128	24.0308198657296	0.140584828081079	ccdc149a	1.59217487340529e-126
si:dkey-15b23.3.1	OK	0.00423127731770604	2.63303532046026	0.0122036091098151	si:dkey-15b23.3.1	0.0123816844960398
KCNIP4	OK	6.9489102948885e-10	6.0566584900471	0.0350924926132719	KCNIP4	3.682143990331e-09
ppp1r15a	OK	7.48382546691748e-244	33.3284194450343	0.19514436667134	ppp1r15a	3.4614763953903e-242
CT573817.1	OK	0.000407544269544379	3.34761944603148	0.0190793338823651	CT573817.1	0.00138325579382724
SIPA1	OK	5.50903413905415e-07	4.87252540443698	0.0279892519106438	SIPA1	2.44508591838334e-06
rab1ba	OK	1.0666403852234e-24	10.192889254163	0.0594418680323905	rab1ba	9.01841747627836e-24
etnppl	OK	1.76235322729219e-264	34.7231519793052	0.202822123191233	etnppl	8.88942314989698e-263
psmd9	OK	6.62068681728925e-07	4.83609638124021	0.0279919908066977	psmd9	2.91899398210735e-06
furina	OK	2.23264852749806e-50	14.8796951118537	0.0869554273850756	furina	2.82535416132503e-49
trappc2l	OK	1.77714758324406e-06	4.63587569901751	0.0268397220014897	trappc2l	7.58320217265453e-06
CU468723.4	OK	5.25095398832673e-14	7.43443093572974	0.0431734373327496	CU468723.4	3.30412062081734e-13
hnf4b	OK	1.36170301243596e-19	8.97936229865409	0.0521532286516073	hnf4b	1.01717916623233e-18
tdrd7b	OK	0.000606287840377445	3.23590538814783	0.0183147500186588	tdrd7b	0.00201098569336096
adamts17	OK	2.69979373347759e-12	6.89465449591049	0.0399633842835923	adamts17	1.59025209362194e-11
lgi2a	OK	3.89379369529911e-06	4.47094184657437	0.0218994221431114	lgi2a	1.62094842489959e-05
nr1h3	OK	0.0104577350437873	2.30950688467476	0.0132119059864235	nr1h3	0.0283820460985931
crtc3	OK	1.55987911194341e-12	6.97222105587363	0.0405728286850172	crtc3	9.28409531275153e-12
piezo1	OK	4.06707441374747e-29	11.1386516555897	0.0648015704873212	piezo1	3.77340815981626e-28
CU607104.1	OK	0.0141363613789681	2.19348126788505	0.0121861505950649	CU607104.1	0.0373075527328509
gpr78b	OK	0.00100264371791381	3.08944809308641	0.0174367341220283	gpr78b	0.0032278509521486
CABZ01057496.1	OK	6.28357755651813e-45	14.0152969358698	0.0817136593217414	CABZ01057496.1	7.47972487010223e-44
CR384075.1	OK	1.31793988337557e-66	17.2004256754087	0.100532389509156	CR384075.1	1.9713266668462e-65
CU467042.1	OK	0.0181029252147021	2.09460803424707	0.0118217513012742	CU467042.1	0.0465220125276645
si:dkey-251i10.2	OK	1.34641287221052e-45	14.1242417688142	0.0818912076021385	si:dkey-251i10.2	1.61885967834272e-44
vamp8	OK	1.02320090105698e-25	10.418270668872	0.0607644852964125	vamp8	8.82678024383942e-25
wdr66	OK	7.6383905909305e-16	7.97468673048803	0.0463242627765374	wdr66	5.11176758473136e-15
tagln2	OK	9.56712396235648e-46	14.1482941942505	0.0822717165115061	tagln2	1.15251432298085e-44
srrm4	OK	0	52.4817644653511	0.307453113070535	srrm4	0
hmgn7	OK	3.01441865648007e-36	12.5169763215362	0.0730761939626741	hmgn7	3.13302078355302e-35
tprn	OK	1.05998388412079e-06	4.74163838196419	0.0273854806564471	tprn	4.61092069946625e-06
ugt2a5	OK	0.00378692566519738	2.67049937176735	0.0151102408245253	ugt2a5	0.0111753313126349
sat1a.2	OK	5.94791268811408e-206	30.6009298817276	0.179140176750237	sat1a.2	2.259215502702e-204
pja2	OK	0.0192525999975112	2.06943590648547	0.0118066877211522	pja2	0.0491440209080144
myhz2	OK	0.015457842463812	2.15815625878761	0.0122469332794628	myhz2	0.0403953562728348
ube2g1a	OK	0.00161485498300335	2.94498435200311	0.0169181246141291	ube2g1a	0.00504144452912964
lmx1ba	OK	4.98351267714448e-16	8.02726424528209	0.0463886533055904	lmx1ba	3.35657386629057e-15
mvb12ba	OK	7.31736906993211e-11	6.40913519182302	0.037268189031444	mvb12ba	4.07009374781735e-10
rasgef1ba	OK	4.34647167547025e-22	9.59136242654013	0.0557698600357567	rasgef1ba	3.45471459836283e-21
DNAH10	OK	1.01899704127035e-08	5.60874468888029	0.0325539257884551	DNAH10	5.07051147828631e-08
il13ra2	OK	0.0144517130129132	2.18480120012905	0.0120920194542865	il13ra2	0.0380636681572517
KCNT1	OK	1.79240973503611e-156	26.6239575474643	0.155646065440454	KCNT1	5.02616550868235e-155
chrne	OK	1.29607766069425e-15	7.90911958081127	0.0460031931389164	chrne	8.60926626283628e-15
pld2	OK	0.000713572115917525	3.18910420341925	0.0183682868818759	pld2	0.00234081907536462
barhl1a	OK	6.82862586658608e-71	17.7630635762066	0.103339650444302	barhl1a	1.05216239612444e-69
pnpla7b	OK	9.89425795974833e-12	6.70757507528147	0.0389573577293032	pnpla7b	5.70336060687355e-11
mccc2	OK	0.000731412506849189	3.18195904700118	0.0183292068082947	mccc2	0.00239526846952349
homer1b	OK	4.23116823861366e-06	4.45314043767315	0.0250810796762859	homer1b	1.75672667396168e-05
zbtb20	OK	7.63743648423876e-210	30.892048330764	0.18087457364442	zbtb20	2.98228808759161e-208
zgc:158640	OK	9.86831703721856e-08	5.20180114672144	0.0301211128497492	zgc:158640	4.62322630921383e-07
efnb1	OK	4.92287076721597e-28	10.9143255034712	0.0636403473381103	efnb1	4.44725936084098e-27
bcl7a	OK	0.000107595896342991	3.70048029140544	0.0213604918425715	bcl7a	0.000390576531338322
foxn4	OK	0.00076479757093325	3.16900927439278	0.0173981507632001	foxn4	0.00249906596038276
eda	OK	3.42577664203044e-29	11.1539254960923	0.0649381707126244	eda	3.18430829214168e-28
atp6v1g1	OK	3.44473586090389e-40	13.2181980384549	0.0771757642346122	atp6v1g1	3.81937564338786e-39
si:ch73-376l24.3	OK	0.00330520906403395	2.71585841449821	0.0155735660753883	si:ch73-376l24.3	0.0098464986365142
ankfy1	OK	0.00374934145080642	2.67384621720675	0.015293184033656	ankfy1	0.0110800708275688
xbp1	OK	8.66000255365199e-83	19.2394004748963	0.112522836949684	xbp1	1.49207975269761e-81
CFAP77	OK	2.24376601334315e-38	12.9002304460097	0.0752641742100537	CFAP77	2.42139346485146e-37
lrch2	OK	1.52470617074385e-10	6.29624552671553	0.0365240559800242	lrch2	8.36020537934765e-10
zgc:110626	OK	1.86079282948667e-05	4.12411769813676	0.0235612787582796	zgc:110626	7.30019021007845e-05
si:dkey-70b23.2	OK	6.25301406080078e-11	6.43305996763981	0.0373737771614208	si:dkey-70b23.2	3.48425893510146e-10
nexmifa	OK	4.20758433646856e-81	19.0370395934075	0.111301587606962	nexmifa	7.15603336030735e-80
tenm1	OK	2.60657638351495e-30	11.380779730312	0.0663335586619615	tenm1	2.47703803481183e-29
ugt2a4	OK	2.79806917320183e-06	4.54110035774582	0.026135848922666	ugt2a4	1.17515155139884e-05
znrf3	OK	1.47094177450773e-65	17.0600728009176	0.099721969196678	znrf3	2.16784475867926e-64
mrpl41	OK	0.00764926917859202	2.4252336200016	0.0138386734661295	mrpl41	0.0213754909194207
myo1ha	OK	0	48.1722181489885	0.281341522690956	myo1ha	0
si:ch73-138i16.1	OK	0	65.4678079030629	0.383501341490911	si:ch73-138i16.1	0
prps1a	OK	4.69707792101781e-05	3.90572948325267	0.0225430165907825	prps1a	0.000177282514908153
rpl7a	OK	9.90602303847047e-223	31.8371724729538	0.18641036580481	rpl7a	4.15970002598687e-221
tmem132e	OK	1.64062486135538e-135	24.7477115160763	0.144604500282092	tmem132e	4.09242036311621e-134
coq5	OK	0.000663765689380049	3.20996066412045	0.0184414289209316	coq5	0.00218889003776223
atp1b2b	OK	0	79.1551937563927	0.463948595036594	atp1b2b	0
rab14	OK	2.00793568932569e-13	7.25502517423004	0.0422124864817541	rab14	1.23830110198538e-12
si:ch211-271b14.1	OK	0.00302680604187748	2.74486323108298	0.0157570411093432	si:ch211-271b14.1	0.0090666747118923
pxna	OK	4.45947026209645e-16	8.0408884738833	0.0467425663202045	pxna	3.00765294593748e-15
doc2b	OK	1.50872861750823e-28	11.0212775460783	0.0641810628055963	doc2b	1.38239465322784e-27
mbd2	OK	0.015252914788753	2.16345983726199	0.0123615301906807	mbd2	0.0399097506355547
si:ch211-130m23.5	OK	0.000571932098441077	3.25252031291429	0.0184408757070984	si:ch211-130m23.5	0.0019023173379089
arvcfb	OK	1.36332936716637e-146	25.7564891596402	0.150518858281849	arvcfb	3.63201954362313e-145
rnf185	OK	3.8667108884793e-07	4.94197730996468	0.0286491654782743	rnf185	1.73314098450362e-06
kremen1	OK	0	48.634745338716	0.284899911589167	kremen1	0
vcana	OK	4.14956832760094e-13	7.15612187528673	0.0406783713929928	vcana	2.5261177368778e-12
zgc:163098	OK	0.00114736999840817	3.04917076990971	0.0175496831109752	zgc:163098	0.00366226362237005
hapln1a	OK	0.000183671725814867	3.56249746865125	0.0200764064502504	hapln1a	0.00064943109935866
nsmfb	OK	5.39426362343393e-168	27.6011179611238	0.161119401067506	nsmfb	1.64312022813931e-166
cds1	OK	0.0137061110117245	2.20559710421031	0.0125870956592371	cds1	0.036275179154658
si:ch211-215c18.3	OK	2.71479823259572e-06	4.54746492865506	0.0209309965446946	si:ch211-215c18.3	1.1415175594254e-05
thy1	OK	1.58432116736553e-19	8.9626858814286	0.0497845922246192	thy1	1.18065836339734e-18
piwil2	OK	2.19415005217389e-20	9.17808391168902	0.0429623188642661	piwil2	1.67290595066749e-19
abca2	OK	2.18485158802394e-305	37.3354337854009	0.218639631227085	abca2	1.25336486178883e-303
gabarapa	OK	3.20115903776155e-08	5.40718450796153	0.0313806092941873	gabarapa	1.54534673440486e-07
wdfy3	OK	7.93872936009195e-32	11.6813389438976	0.0681783488231899	wdfy3	7.74080149078744e-31
smarca1	OK	0.000838082573416134	3.14231689590692	0.0180693802963668	smarca1	0.00272431172626674
notch1b	OK	8.20021905633873e-91	20.1745028420772	0.117956345832325	notch1b	1.50933400531098e-89
klhl13	OK	0.0122139279111531	2.25033235043821	0.0128559045455007	klhl13	0.0326917530220689
me2	OK	0.0183068790419468	2.09004499421072	0.0119037368248501	me2	0.0469450849736666
si:dkey-114c15.5	OK	0.00084706942609478	3.13919289972582	0.0179814865232518	si:dkey-114c15.5	0.00275209738760628
ugt2a7	OK	1.52214305163478e-08	5.53887051733358	0.032108313733874	ugt2a7	7.50710292375218e-08
tnc	OK	0	63.3928078252057	0.371488281995208	tnc	0
aldh3b2	OK	2.23728162777615e-21	9.42084872965509	0.0540100619233726	aldh3b2	1.74942024724642e-20
myha	OK	5.85516549985469e-32	11.7071849550035	0.0661292285341424	myha	5.73147770073633e-31
tango2	OK	0.00158070648461346	2.95159107721822	0.0169415797039479	tango2	0.00494209561607439
mvk	OK	0.00191523379574413	2.89179584970911	0.0164332170042523	mvk	0.0059246046428319
edil3a	OK	1.5874444814255e-110	22.3067884507512	0.130027870161641	edil3a	3.3926381675069e-109
serinc5	OK	3.78263116743083e-11	6.50900019763333	0.0378380968591224	serinc5	2.1295032727672e-10
gak	OK	5.45228687543441e-05	3.8695291636962	0.0223792027978428	gak	0.000204248923610677
ypel1	OK	0.00288215718990958	2.760895349209	0.0158707247320113	ypel1	0.00865510285024476
slc30a5	OK	0.00250604025815277	2.80625632302055	0.0161113712456133	slc30a5	0.0075901804073495
snx18a	OK	5.92042796163363e-09	5.70200182657321	0.0329884438578342	snx18a	2.99413372140798e-08
atp2a3	OK	0	98.7985799168606	0.579116379293	atp2a3	0
si:dkey-34e4.1	OK	4.62380576470595e-19	8.84384954406583	0.0514381076781842	si:dkey-34e4.1	3.39426608244256e-18
mtif3	OK	0.00714623948750279	2.44982719336431	0.0138482573347376	mtif3	0.0200862291414068
arl15a	OK	1.82501821577766e-16	8.14964185482669	0.0474428275330114	arl15a	1.24256875750489e-15
castor2	OK	0.000400630105037842	3.35235907971687	0.0193304193598264	castor2	0.00136089378092055
sh2b3	OK	0.00604195511942685	2.50968441030666	0.0143744308726228	sh2b3	0.0172120196464672
mapk1	OK	1.41206501613907e-05	4.18720317105174	0.0242220898276207	mapk1	5.60821576197567e-05
sptbn2	OK	0.00866838639323195	2.37948661168442	0.0136103890024377	sptbn2	0.0239431223547743
ddr2l	OK	7.09632152574143e-07	4.82228013568877	0.0277557037472828	ddr2l	3.12430074339325e-06
ttll11	OK	7.3106863723256e-123	23.5435359884667	0.137681716741737	ttll11	1.70962310324469e-121
cox7c	OK	0	40.2744956819561	0.235905122324064	cox7c	0
dab2ipb	OK	3.62776445600308e-55	15.600209803896	0.0910848277457395	dab2ipb	4.82207991238289e-54
ncor1	OK	1.34058872287932e-05	4.19898190336024	0.0243138002528801	ncor1	5.3404129499224e-05
si:ch211-202f5.3	OK	6.78628970747893e-16	7.98928300849844	0.0447869949659881	si:ch211-202f5.3	4.54759413731059e-15
spag7	OK	2.81414410101489e-19	8.89913641891733	0.0518379099771605	spag7	2.07982837465632e-18
RNF224	OK	2.36378759166883e-86	19.660210921479	0.11493757826112	RNF224	4.18487225533517e-85
galnt9	OK	0	55.9521243907243	0.32779564391684	galnt9	0
rorb	OK	1.15285051740483e-17	8.47725455633002	0.04929213541454	rorb	8.122768302648e-17
myhz1.3	OK	1.00685233888826e-11	6.70502603059365	0.0386991145690135	myhz1.3	5.80114485947826e-11
TMEM8B	OK	1.69366192034343e-231	32.4644492559257	0.190061059373512	TMEM8B	7.33305883956638e-230
fbrsl1	OK	1.7678596875963e-92	20.3633487696401	0.119122339338667	fbrsl1	3.31476997070693e-91
si:ch211-130h14.6	OK	0.00266066424682497	2.78690982127281	0.0158400778033134	si:ch211-130h14.6	0.00801974173423771
arhgef9a	OK	1.55441862835718e-08	5.53519418530919	0.0320975342851385	arhgef9a	7.6602556701958e-08
tmem150aa	OK	6.39009042564864e-06	4.36383530401448	0.0251612333927064	tmem150aa	2.61497187203046e-05
si:ch211-271e10.1	OK	1.47291507804065e-07	5.12688008174884	0.0249907923611447	si:ch211-271e10.1	6.81515468648967e-07
pisd	OK	2.93963181489459e-05	4.01760501715277	0.0232305878557398	pisd	0.000112784863739811
slc25a11	OK	9.85048983595926e-11	6.36365390077589	0.0369078223698099	slc25a11	5.44524652034537e-10
UNC5C	OK	4.59221275199676e-80	18.9114232126159	0.110525698037778	UNC5C	7.747118538345e-79
ndufs4	OK	6.7000607806821e-20	9.05707031864948	0.0527829533043286	ndufs4	5.04547382730308e-19
MFSD3	OK	0.0141585733842825	2.19286444927776	0.0124769095009282	MFSD3	0.0373622395969029
fam222a	OK	0.00754614178983612	2.43015700144953	0.0138694481059935	fam222a	0.0211061283643202
iqcd	OK	1.94111279531233e-08	5.49612718667356	0.0317823720525773	iqcd	9.51540020838575e-08
rasa1a	OK	3.69945781340864e-12	6.84973066723019	0.0398365911686217	rasa1a	2.16888933405849e-11
slc2a11b	OK	0.0050221937432213	2.5742974647668	0.0145837962319395	slc2a11b	0.0145014253569241
pik3r1	OK	3.15896130732326e-05	4.00061068794053	0.0231398335718383	pik3r1	0.000120866912413442
cryabb	OK	9.0681298209486e-73	18.003963655175	0.104948312030519	cryabb	1.42794564372714e-71
adamtsl2	OK	9.08906054827704e-13	7.04779037295934	0.0396956326676698	adamtsl2	5.46149709695008e-12
abl1	OK	4.28376256935546e-10	6.13403946250724	0.035625903197753	abl1	2.29710468130849e-09
trpv4	OK	0.00492513303223372	2.58104177731069	0.0144301794673701	trpv4	0.0142342817598648
trafd1	OK	3.069322020455e-10	6.18682913099451	0.0359447514039626	trafd1	1.65865129835711e-09
ephb4a	OK	4.14508278803077e-28	10.9299417137743	0.0635838463895634	ephb4a	3.75002094598135e-27
FP102073.1	OK	1.07896858449325e-06	4.73804141512282	0.0271020584023159	FP102073.1	4.69024855985112e-06
tpcn1	OK	7.5095091404533e-06	4.3284092670028	0.0250008283190265	tpcn1	3.05362343296065e-05
tars1	OK	0.000278794943584907	3.45144669468116	0.0198881881118562	tars1	0.0009652134291852
gltpa	OK	0	48.5592082248291	0.284354187619286	gltpa	0
bmpr1ba	OK	2.35575186219636e-63	16.7609357124946	0.0979059993860838	bmpr1ba	3.39599444700406e-62
anxa1a	OK	4.77444434450624e-57	15.8742876220906	0.0920212519833736	anxa1a	6.4732582624352e-56
ttc16	OK	0.0145999863237353	2.18077621486677	0.0122791988467371	ttc16	0.0384017476812212
ufc1	OK	1.39728807611433e-16	8.18187640313856	0.047596027859401	ufc1	9.54198168894312e-16
isl1	OK	1.1654151656064e-64	16.9387349937493	0.0987967638755286	isl1	1.70156044185131e-63
rgs3b	OK	0.00108016858253472	3.06725605039593	0.0172927432184441	rgs3b	0.00346054264480039
si:ch211-207k7.4	OK	7.40602896218445e-08	5.25488054367753	0.0302766011841637	si:ch211-207k7.4	3.49185142097051e-07
pdlim5a	OK	1.20953573674797e-08	5.57899862910098	0.03210795995559	pdlim5a	5.99838800881008e-08
si:dkey-112e17.1	OK	1.68522599976989e-38	12.9222708248181	0.0728629824007332	si:dkey-112e17.1	1.82492140769898e-37
camkk1a	OK	1.63191081768316e-66	17.1880397649966	0.100483213211423	camkk1a	2.43804364055418e-65
parp8	OK	8.90815849326017e-23	9.75352991707995	0.0568709836643328	parp8	7.21546446744876e-22
tbx3a	OK	6.41869159786901e-18	8.54514604135319	0.049601155141474	tbx3a	4.55320259385903e-17
zdhhc8b	OK	5.32646481884145e-30	11.3182902489943	0.0659916074849264	zdhhc8b	5.02934638582058e-29
si:ch211-102c2.8	OK	0.0145662997191761	2.18168756298085	0.0117935727943707	si:ch211-102c2.8	0.0383252065134367
myo1ca	OK	2.72355127050183e-196	29.865966098377	0.174760962280029	myo1ca	9.83814219023205e-195
polr2j	OK	7.38093807045696e-06	4.33221190099408	0.0250017532066722	polr2j	3.00475375914721e-05
BX470189.2	OK	8.66870836398612e-22	9.5198829882608	0.0554203636912157	BX470189.2	6.84459370005569e-21
ccl19a.1	OK	1.30171125586371e-121	23.4211325302571	0.135953827293537	ccl19a.1	3.01874185691464e-120
pappab	OK	0.000231234867661738	3.50160209953346	0.0199639900703825	pappab	0.000808709109572
sdf2l1	OK	2.34079610963888e-11	6.58072517733664	0.0382242228786804	sdf2l1	1.3273335822786e-10
CU467961.1	OK	1.23882482538858e-18	8.73310952292955	0.0508373708940762	CU467961.1	8.96021337209067e-18
ube2l3b	OK	4.68511940441106e-05	3.90634580976824	0.0225717783567872	ube2l3b	0.00017685779001533
pdzd2	OK	1.68004837693485e-09	5.91296202174559	0.0340539246767434	pdzd2	8.73980758692255e-09
mtmr8	OK	2.83734120261318e-146	25.7280597926228	0.150502390948596	mtmr8	7.54287450777412e-145
lamc3	OK	0.000173359425515594	3.57763372121334	0.0203330655235072	lamc3	0.000615050585656725
rplp0	OK	1.83611533265887e-212	31.0864486535398	0.182007092868497	rplp0	7.24875201172051e-211
fdxacb1	OK	1.70705593366965e-08	5.5187542787072	0.0319048407352388	fdxacb1	8.39341480943349e-08
cenpv	OK	7.10941098933941e-19	8.79567687534211	0.0508900169237704	cenpv	5.17496585632258e-18
UBB	OK	1.02945329251079e-222	31.8359653024407	0.186406194580919	UBB	4.31561280768444e-221
f11r.1	OK	0.00024006879096519	3.4915995073748	0.020168342285943	f11r.1	0.000837617887363444
srek1	OK	1.51991235213497e-21	9.46135352854861	0.055154935505264	srek1	1.19406714997404e-20
si:ch211-102c2.7	OK	0.00127962209360094	3.0162473232953	0.0173050189299666	si:ch211-102c2.7	0.00405701862457088
nupr1a	OK	4.24059778201304e-24	10.0578717202963	0.058633868698697	nupr1a	3.53298590220289e-23
nrarpb	OK	2.94357341596467e-45	14.0690298613197	0.0818972476168875	nrarpb	3.5189528833962e-44
capga	OK	0	77.2708436816267	0.452680034731126	capga	0
golph3	OK	0.00744049709282058	2.43526239582195	0.0139403296278543	golph3	0.0208385455948965
alg9	OK	7.82388705128459e-08	5.24476960195341	0.0303963923484555	alg9	3.68470833155464e-07
setbp1	OK	9.68577839063704e-20	9.01677056443745	0.052572867354689	setbp1	7.26114768166507e-19
capns1a	OK	6.95577306594385e-10	6.05649962912728	0.0349508748982914	capns1a	3.68422300845439e-09
si:dkey-220k22.1	OK	5.61376657586803e-06	4.39207233081308	0.0253571784905363	si:dkey-220k22.1	2.30972450829535e-05
dapk1	OK	2.63689232706316e-08	5.44182373148938	0.0315958629511257	dapk1	1.28059383469869e-07
plp1b	OK	2.31917568829682e-12	6.9162257237339	0.0399347888223035	plp1b	1.37024311406818e-11
tcn2	OK	0.00344385625172545	2.70222504806006	0.0153935255547347	tcn2	0.0102327880021934
shisa2a	OK	0	65.6189641525772	0.384302377529848	shisa2a	0
rabl6b	OK	2.42116275394303e-44	13.9192091258393	0.0812162218052796	rabl6b	2.84824631997174e-43
nipbla	OK	0.0129262341442539	2.22842078564103	0.0127550541780035	nipbla	0.0343817255981222
rtn4r	OK	0	78.9966442988011	0.462925661743859	rtn4r	0
ubb	OK	4.6298105234446e-294	36.6307775015674	0.214494209105293	ubb	2.56213509960779e-292
gpsm1a	OK	1.80592666444697e-47	14.4248249062898	0.0837620621190208	gpsm1a	2.21274562810464e-46
myhz1.2	OK	6.71694765598505e-09	5.68045237786877	0.0327483581775915	myhz1.2	3.38602776569252e-08
tmc2a	OK	0	95.0494397258178	0.557144290328313	tmc2a	0
fam78aa	OK	0.00233806605999892	2.82853682335399	0.0161344043204147	fam78aa	0.00711668019161158
jak2b	OK	6.31078059192378e-12	6.77291213627081	0.0393874272967201	jak2b	3.66724521694338e-11
p2rx5	OK	0.00965261808708964	2.33958387548337	0.0126549932106164	p2rx5	0.026431620188449
mtmr12	OK	0.0104562367457372	2.30956095263748	0.0131988120693221	mtmr12	0.0283810522930798
aif1l	OK	0	44.3021383228588	0.259238106877056	aif1l	0
zfr	OK	1.99410932480134e-08	5.49137264265628	0.0318761301825451	zfr	9.76564302860809e-08
bckdk	OK	2.48631820966996e-05	4.05690938143267	0.0234654441769986	bckdk	9.62915359156748e-05
bco2a	OK	5.61633040212099e-23	9.80023266967813	0.0570970674121905	bco2a	4.56980807694811e-22
sh3glb2b	OK	1.39985062141654e-188	29.2661271266199	0.171321534705237	sh3glb2b	4.85378357237778e-187
emc6	OK	1.56772561500706e-05	4.16339873099904	0.0240684780399934	emc6	6.197967740516e-05
BX465834.1	OK	1.25502119540451e-161	27.0654942261632	0.15833287658848	BX465834.1	3.63724004018446e-160
plpp7a	OK	4.97296747344041e-08	5.32770891439514	0.030839004008405	plpp7a	2.37371137836401e-07
kifl	OK	0	38.90224324667	0.227681067559542	kifl	0
cyp1d1	OK	4.75427680535546e-13	7.13743937430416	0.0413297748866429	cyp1d1	2.88723268491899e-12
timm8b	OK	0.000370498903819777	3.37394273574642	0.019421524544014	timm8b	0.00126436659676804
pcsk5a	OK	0	71.5674690603041	0.419446080094607	pcsk5a	0
si:dkey-96l17.6	OK	0	44.7692618579523	0.262170192301056	si:dkey-96l17.6	0
rnf215	OK	0.00154278076446204	2.95908283113435	0.0165858369670266	rnf215	0.00483026988688633
edf1	OK	1.92779531729171e-20	9.19201255533988	0.0535840784904435	edf1	1.47161695521272e-19
hexb	OK	4.9463612495946e-41	13.3634093217178	0.0779782882627077	hexb	5.55557034794297e-40
whrnb	OK	2.33910329612451e-136	24.8261697481031	0.145134327368665	whrnb	5.87564935175806e-135
stxbp1b	OK	8.60460405429939e-05	3.75681141682156	0.0208345360375363	stxbp1b	0.000315440264661272
tesca	OK	1.24222986868544e-24	10.1780675864278	0.0590260438473495	tesca	1.04853402619782e-23
hspb1	OK	0.00838826922403807	2.39156881949021	0.0136320093822068	hspb1	0.0232301947053123
apba1a	OK	0	44.8475946245081	0.262722924867466	apba1a	0
prlrb	OK	7.24578378850886e-37	12.6296531037953	0.073650737245296	prlrb	7.60019053531919e-36
mef2cb	OK	1.8634108370947e-267	34.9197652136846	0.204377490157536	mef2cb	9.53343801533202e-266
spef2	OK	1.62853100482185e-16	8.16340645783428	0.0474901252370941	spef2	1.11120423951766e-15
zbtb44	OK	0.00737883433123362	2.43827191004597	0.0138081065380335	zbtb44	0.0206820212264866
tmc2b	OK	0	64.3908190741325	0.377302546735337	tmc2b	0
ank1a	OK	4.57989248818182e-164	27.2718223494304	0.159593847617683	ank1a	1.35233598099211e-162
myhz1.1	OK	5.14184649986601e-87	19.7374508853303	0.115120202406083	myhz1.1	9.20063882263675e-86
si:ch211-137i24.10	OK	3.11534622485056e-16	8.08472049551464	0.0346407874229593	si:ch211-137i24.10	2.10849391227804e-15
si:zfos-375h5.1	OK	8.11476695759489e-07	4.79546817088474	0.0277431034387933	si:zfos-375h5.1	3.55956417952662e-06
fam189a2	OK	4.32052346864072e-06	4.44865304041868	0.0257561757787275	fam189a2	1.79263824619918e-05
brd3b	OK	0.00355288470968839	2.6918462541541	0.0154707154479093	brd3b	0.0105462444464842
mpdu1a	OK	3.69746309374626e-16	8.06381562764604	0.0468493434024826	mpdu1a	2.49977622160531e-15
fam222ba	OK	5.82384927612696e-06	4.38407996516235	0.0251985880914977	fam222ba	2.39341110661028e-05
fbp1a	OK	1.84431900783327e-07	5.08436201985342	0.0291362716629791	fbp1a	8.45251064120149e-07
ctsla	OK	2.71501009293582e-34	12.1544890679967	0.0709691095600173	ctsla	2.75668643255602e-33
sik2a	OK	1.4192503126791e-22	9.70615248839821	0.0564998957444087	sik2a	1.14292277830236e-21
msna	OK	1.24418084207168e-19	8.98928844906075	0.0522144080919549	msna	9.29945424266397e-19
TMC1	OK	0	122.16637891224	0.716184555073963	TMC1	0
araf	OK	6.28954399529647e-06	4.36730176038372	0.0252653203661691	araf	2.57508702299669e-05
sub1b	OK	1.28694692623661e-26	10.6136863267569	0.0619018686169659	sub1b	1.13161951925028e-25
dpm2	OK	1.1392990032514e-05	4.23568126733422	0.0245120594732142	dpm2	4.56758143491273e-05
rpain	OK	0.000695270734142273	3.19660719645314	0.0183331146488501	rpain	0.00228586780776559
rxrab	OK	0.00107441719606269	3.06885141158507	0.0175217068862213	rxrab	0.00344343706061052
emb	OK	0	57.9596978799956	0.339624296075367	emb	0
eif4a1b	OK	8.03697435938834e-51	14.9478996015067	0.0873337801465361	eif4a1b	1.02325500363386e-49
lifra	OK	3.50465125331922e-21	9.37361028784027	0.0545962241647734	lifra	2.72428224091347e-20
dlb	OK	4.02914779052181e-105	21.742932111852	0.126968018948405	dlb	8.25218185952544e-104
dab2	OK	8.11137107986109e-07	4.79555207033642	0.0272744586217934	dab2	3.5586972628813e-06
mrps30	OK	0.000859965516007296	3.13476283034412	0.0180381691586975	mrps30	0.00279218696034023
fam102ab	OK	2.74010177212795e-38	12.8848216621597	0.0752166504451712	fam102ab	2.94687307273598e-37
nlgn3b	OK	1.24757606647351e-09	5.96177326456093	0.0336597240701756	nlgn3b	6.52932868693618e-09
zfand5a	OK	1.32970225893276e-10	6.31743487426074	0.0367260124363266	zfand5a	7.30695000639749e-10
ckap2l	OK	0.0169262796683628	2.12182353703594	0.0114928124881911	ckap2l	0.0438397463587341
dao.2	OK	0.00325344325051264	2.7210807482768	0.0139346321345045	dao.2	0.0097026610572331
c1qbp	OK	2.78066453201583e-09	5.82944119271234	0.0338199328581554	c1qbp	1.42845244166199e-08
purba	OK	3.02737348974375e-15	7.80280208253007	0.0453829965606088	purba	1.98829515363862e-14
adgrv1	OK	0	57.1609928109657	0.334928118182973	adgrv1	0
atf5a	OK	3.65084411079465e-16	8.06536583747088	0.0463172740674205	atf5a	2.46892395504481e-15
hint2	OK	0.00254072464371489	2.80182459893019	0.0161053415861826	hint2	0.0076822368946193
si:dkey-27p23.3	OK	3.80423257974141e-54	15.4494544823421	0.090246886378515	si:dkey-27p23.3	5.01410654792521e-53
gria3a	OK	4.25254083973464e-25	10.2818814979599	0.0592868102593886	gria3a	3.6236215605475e-24
slc25a25b	OK	6.62183725546432e-20	9.05835160624412	0.0527362660348747	slc25a25b	4.98806605039768e-19
pimr201	OK	1.36720297787009e-14	7.61030937265905	0.0400573660095676	pimr201	8.78155558601725e-14
hip1rb	OK	4.75448491885397e-10	6.11744141972987	0.0355475340754133	hip1rb	2.54191048050224e-09
h2az2a	OK	3.89371427457263e-11	6.50465037012233	0.0377677231804286	h2az2a	2.1910555140126e-10
fras1	OK	3.75350718503072e-56	15.7443741502929	0.091994521318479	fras1	5.03459987274132e-55
nos1	OK	0.00695134124660504	2.45976807641108	0.013542023881865	nos1	0.0195911381350356
ksr2	OK	5.21766910594756e-19	8.83034496040394	0.0508214162362903	ksr2	3.82237717174165e-18
mat2ab	OK	1.13668920419572e-10	6.34163606863478	0.0365286301711065	mat2ab	6.26140664908428e-10
arid3c	OK	1.71324166640697e-20	9.20469329993934	0.0535393225899865	arid3c	1.30902942197977e-19
phldb1a	OK	1.13661377909769e-20	9.24866085501768	0.0539014780393819	phldb1a	8.71369138477064e-20
mxd1	OK	8.45499014711281e-07	4.78722905222547	0.0277423681794516	mxd1	3.70491431564361e-06
snrnp27	OK	2.65809802750586e-20	9.1574015212123	0.0533538835753663	snrnp27	2.0211058371715e-19
ENSDARG00000062538	OK	2.24647037534412e-33	11.9805571278369	0.0698339605748003	ENSDARG00000062538	2.24817428501005e-32
hnrpkl	OK	1.07569363176179e-08	5.59936473350106	0.0325148657997625	hnrpkl	5.34520587802503e-08
si:dkeyp-20g2.1	OK	0.0101413469448867	2.32107689954424	0.0128984320344096	si:dkeyp-20g2.1	0.027646088142819
enc1	OK	3.50198109363702e-17	8.34696473095874	0.0485375726327058	enc1	2.42852459298441e-16
kank1a	OK	2.71445750294809e-23	9.87340611627223	0.0575886935266282	kank1a	2.2187393264234e-22
naa38	OK	5.59926091183614e-05	3.86303878794869	0.0222904301509153	naa38	0.000209504286266896
paip1	OK	0.0119900079485939	2.2574492716345	0.0128940029966573	paip1	0.0321404522308919
arcn1a	OK	0.014376121573523	2.18686688298449	0.0124813729614585	arcn1a	0.0378765099029583
selenom	OK	1.05660704345588e-25	10.4152141689097	0.0606315603875004	selenom	9.1118273038856e-25
drd2b	OK	5.02875655761677e-50	14.8252697129779	0.0864143601435747	drd2b	6.31909263874159e-49
arhgef28a	OK	1.3971993423141e-126	23.9038294935357	0.139852935336014	arhgef28a	3.3295047825544e-125
ntrk2b	OK	6.8857262224583e-06	4.3474737852734	0.0251283653218453	ntrk2b	2.81264700072576e-05
atp6v1aa	OK	6.00595693448499e-58	16.0038463498364	0.0935010088942649	atp6v1aa	8.23650625769169e-57
rfc5	OK	1.17282343177562e-23	9.95720488301008	0.0578155375684567	rfc5	9.67154954315227e-23
nrgna	OK	2.40184206287229e-19	8.91670469697088	0.0509707466107034	nrgna	1.77983383606696e-18
ggnbp2	OK	0.00123606710856334	3.02673152320918	0.017406737216772	ggnbp2	0.00392438783492582
arrdc3a	OK	1.70108544817459e-05	4.14472814258208	0.023982333961127	arrdc3a	6.69774008171648e-05
pafah1b2	OK	7.16131816795804e-06	4.33885594474044	0.0207865385084944	pafah1b2	2.91913959597626e-05
ckma	OK	9.29686544332306e-09	5.62460093622931	0.0324704328121842	ckma	4.64176697467966e-08
acsl4b	OK	2.87789640352428e-78	18.6919610329427	0.109257366171476	acsl4b	4.76840614275943e-77
stip1	OK	1.52826587023417e-64	16.9227805740785	0.0988905445698057	stip1	2.2274475058663e-63
sptbn4a	OK	0.00198664667391497	2.88027428874616	0.0164428709242103	sptbn4a	0.00613416005276196
npffr1l2	OK	2.61555198040677e-05	4.04505411344888	0.0220177807763592	npffr1l2	0.000100922383556745
gas1b	OK	3.53901157214674e-15	7.78307930687381	0.0450474600801298	gas1b	2.31885732101795e-14
iscub	OK	8.76527952325884e-26	10.4329783394999	0.0608065537203616	iscub	7.56930046050899e-25
tet3	OK	5.36052393197369e-05	3.87366564239714	0.0223941861639232	tet3	0.000201021652132608
eef2l2	OK	9.19678843155695e-77	18.5062288463699	0.108150754644025	eef2l2	1.49807855224627e-75
cacna1ba	OK	3.55378691673797e-30	11.3537168163702	0.0660105123872983	cacna1ba	3.36823758849543e-29
pgam5	OK	0.00676432534575376	2.46954102015982	0.0140955202859687	pgam5	0.019115643342656
krt1-c5	OK	0.00746242707919991	2.43419737668053	0.0136348868327352	krt1-c5	0.0208906291958082
AL928901.1	OK	0.00490797980629978	2.58224597282115	0.014403494570873	AL928901.1	0.014194525353499
rsph4a	OK	2.45616500930726e-08	5.45445490052361	0.0315538505572623	rsph4a	1.19560389550143e-07
unc5db	OK	6.70425848310815e-94	20.5230314174805	0.11995719640338	unc5db	1.27421573853706e-92
arhgef12b	OK	1.65194809950845e-111	22.4077960013537	0.131003031370326	arhgef12b	3.55473707352596e-110
cemip2	OK	0.00639481465824027	2.48957399282391	0.0142054084192085	cemip2	0.0181430068659377
ncs1a	OK	1.22132213629533e-280	35.7778379773506	0.209130094263198	ncs1a	6.48672132092959e-279
nccrp1	OK	0.00099192307690379	3.0926400279212	0.0176361495366095	nccrp1	0.00319456829585061
si:dkey-98f17.3	OK	2.30407330811091e-14	7.54256546246778	0.0424917345922344	si:dkey-98f17.3	1.46787328490553e-13
tmem119b	OK	4.89539161883278e-08	5.33056472096904	0.0303933601295658	tmem119b	2.33801814617106e-07
rpl36a	OK	4.75878836059741e-187	29.1455315746889	0.170626027409683	rpl36a	1.6253142426678e-185
ap3m2	OK	3.99661036378542e-79	18.7969854084958	0.109875068513389	ap3m2	6.66606954156598e-78
wdr36	OK	0.00305117866831468	2.74223011969587	0.0157011092177672	wdr36	0.00913531566176769
dhrs11a	OK	0.00486560316060359	2.5852370651809	0.0147233472006939	dhrs11a	0.0140752141279911
napaa	OK	0.00322504964090792	2.72397702751441	0.0155611192204532	napaa	0.00962485350570484
ier5l	OK	7.64661210879656e-23	9.76901459822407	0.0567159486197455	ier5l	6.20767224596571e-22
slc8a2a	OK	0	43.9066798939946	0.257074588951857	slc8a2a	0
rps6ka4	OK	0.0117076487056393	2.2665897731503	0.012943026966179	rps6ka4	0.0314676793611741
fancg	OK	0.000805549870990368	3.15388968419395	0.0179004181483267	fancg	0.00262400334145758
znf703	OK	7.33289011962688e-25	10.229245299597	0.0595445510671578	znf703	6.23357824377505e-24
smarca2	OK	6.61862885331876e-10	6.06449053093152	0.0352318945715182	smarca2	3.5123286774735e-09
coro1ca	OK	5.97775551327634e-149	25.9661288802193	0.151836727531819	coro1ca	1.61483138968022e-147
trpm3	OK	1.72600560259532e-12	6.95797391026994	0.0399764883334723	trpm3	1.02533730927635e-11
hdr	OK	0.000118566304273799	3.67577052303806	0.0208720428156747	hdr	0.000428105816194709
CR751602.1	OK	0.00496705208141828	2.57811461508853	0.0146516783922172	CR751602.1	0.0143521240927933
histh1l	OK	1.18328418504789e-59	16.2464556135065	0.0948706779356976	histh1l	1.64524410620996e-58
zgc:153409	OK	0.0100658175243226	2.32388543583297	0.0132724676734141	zgc:153409	0.0274581044088404
flot2a	OK	0.00194543626387287	2.88687623178751	0.016607093602373	flot2a	0.00601358097398632
mcama	OK	2.40480151016654e-56	15.7725147222196	0.091792975712019	mcama	3.23075932788666e-55
btf3	OK	4.57258053517075e-86	19.6267078797473	0.114784054209922	btf3	8.07822561213499e-85
tia1l	OK	0.00113308347355611	3.05293278069298	0.0175610868229809	tia1l	0.00362127353372999
si:dkey-111e8.4	OK	0.0010888883216986	3.06485209767669	0.0172733648549049	si:dkey-111e8.4	0.00348625048999518
nr2f1a	OK	7.09984721428258e-55	15.5572844310325	0.0906588397694081	nr2f1a	9.41725237115608e-54
paqr3a	OK	0.00288705986987866	2.76034020623378	0.015839284520071	paqr3a	0.00866774896742373
pole	OK	0.00758624537760581	2.42823542594776	0.0136638821170652	pole	0.0212088307540091
klf9	OK	0.0030800253674038	2.73913801863809	0.0157102724161687	klf9	0.00921068304132718
CR751602.2	OK	1.1774723911665e-33	12.033991377863	0.0698863571400659	CR751602.2	1.18498817238671e-32
fam172a	OK	2.34844011434625e-08	5.46241969593696	0.0317214468198865	fam172a	1.14494448126305e-07
aifm1	OK	1.41112578852439e-05	4.18735423789024	0.0242147289878078	aifm1	5.60537353708094e-05
si:ch73-280o22.2	OK	1.07806239283835e-34	12.2297457352967	0.0713621938498779	si:ch73-280o22.2	1.10040497255963e-33
rabep1	OK	0.00159105638046192	2.94957505047768	0.0169690883749384	rabep1	0.00497272065849642
ISCU	OK	0.000333901257318088	3.40246768755315	0.0196098930813674	ISCU	0.00114539827855872
si:dkey-201c13.2	OK	0.00474963895977778	2.59354256726727	0.0147614683505852	si:dkey-201c13.2	0.0137810994308645
c2cd2l	OK	2.04292405859472e-36	12.5478238697316	0.073225092456111	c2cd2l	2.12771347008355e-35
prdm8b	OK	0.0104483465811943	2.30984579056416	0.0122468436157017	prdm8b	0.0283627071406562
ranbp1	OK	3.42973117327606e-05	3.98110851356602	0.0229871810637988	ranbp1	0.000130907324578041
fcho2	OK	1.53906208087571e-259	34.3942057820525	0.201417251837617	fcho2	7.6100093304681e-258
si:ch211-284e13.14	OK	0.00480071382740155	2.58986249063332	0.0137252220180579	si:ch211-284e13.14	0.0139164078329243
cert1a	OK	2.25050165021839e-06	4.5867958900908	0.0264728932293976	cert1a	9.53164822931656e-06
selenow1	OK	1.39616165281745e-07	5.13695059171542	0.0298017568451152	selenow1	6.47196310548829e-07
srsf7a	OK	1.19544744224123e-19	8.99367925672288	0.0523918201227094	srsf7a	8.94320260505683e-19
vcp	OK	4.27969327019788e-22	9.59295956385281	0.0559361830059857	vcp	3.40271584492835e-21
slc4a4a	OK	0	37.9872535327197	0.222225482273492	slc4a4a	0
cfap299	OK	9.90904092494508e-34	12.0482211029345	0.0702961749704282	cfap299	9.98431458791994e-33
fam214b	OK	0.0066380573427115	2.47627534585546	0.0141144257328258	fam214b	0.0187821060411326
gucy2d	OK	0.0156948342603366	2.15209759521964	0.0115522436420182	gucy2d	0.0409719671011537
BX510923.1	OK	5.38292686233606e-35	12.2860348096413	0.0708986176234681	BX510923.1	5.52598663029904e-34
myo1hb	OK	8.76176393329287e-237	32.8368955059738	0.191859525363526	myo1hb	3.91530588313225e-235
mthfd2	OK	2.38717586055628e-08	5.45951568008775	0.0316681996268971	mthfd2	1.16360318196161e-07
sema4c	OK	4.66063455119202e-51	14.984148385254	0.0875583797590021	sema4c	5.95501771477232e-50
ehmt1a	OK	0.00649314103241107	2.48414526624581	0.0142016455325377	ehmt1a	0.0183990677677759
fzd9a	OK	6.58195794208253e-06	4.35736247681683	0.0243602966878506	fzd9a	2.69260939376741e-05
sfrp1a	OK	1.32240653977806e-50	14.9146954318663	0.0869988621852374	sfrp1a	1.67855238206056e-49
mks1	OK	0.0123719839340397	2.2453765757717	0.0128270184588938	mks1	0.0330639054128635
mob1ba	OK	1.42560251381463e-11	6.65405785866937	0.0386253465313473	mob1ba	8.16318625372748e-11
tnfsf10l4	OK	7.04569675608018e-11	6.41490150667621	0.0318855657994682	tnfsf10l4	3.92072301838344e-10
idua	OK	0.00999027587443541	2.32671288240847	0.0132422225711453	idua	0.0272757815177762
scai	OK	0.00870500879141713	2.37793239409598	0.0134789437993275	scai	0.0240363327890777
aqp3a	OK	3.05571780499654e-97	20.8936869017512	0.119823654943487	aqp3a	5.93367851692163e-96
bco2l	OK	0.0126818309610882	2.2358185103901	0.0109732911690063	bco2l	0.033785421930236
wscd2	OK	1.28588352195118e-42	13.632346352359	0.0796304249986795	wscd2	1.4820921033454e-41
ppp6c	OK	5.65041267763758e-06	4.39065782935412	0.0253716094798534	ppp6c	2.32403930132398e-05
si:dkey-35m8.1	OK	3.20673678306275e-184	28.9214691385338	0.169042270717013	si:dkey-35m8.1	1.08050651094893e-182
arrdc1a	OK	4.04731272579482e-40	13.2060654130032	0.0770149050529313	arrdc1a	4.48154075631407e-39
aspa	OK	3.28432659652939e-63	16.7411680060101	0.0977279158331674	aspa	4.72373972738929e-62
si:ch211-284f22.3	OK	2.47847369018058e-28	10.9765121151746	0.0639588707030085	si:ch211-284f22.3	2.25527611394327e-27
tbx1	OK	0	48.6270172672838	0.28442685739357	tbx1	0
nono	OK	2.87448032457693e-05	4.02288485458275	0.0232557043949629	nono	0.000110454241656682
traf2b	OK	1.38305621425697e-05	4.19191368477349	0.0242402519172601	traf2b	5.50259264167719e-05
CR936518.1	OK	2.41345473394382e-15	7.83134166894188	0.0453347586660237	CR936518.1	1.58919488699839e-14
si:ch211-225b11.1	OK	1.31596291787249e-10	6.31904033368524	0.0366491927870011	si:ch211-225b11.1	7.23303538437741e-10
zmat4a	OK	0	69.7174046433248	0.408580731081901	zmat4a	0
atp5meb	OK	7.61018111007435e-72	17.8857816831871	0.104573086016456	atp5meb	1.18644048661974e-70
prkrip1	OK	0.011385172582359	2.27726601370183	0.0130055531012329	prkrip1	0.0306568089653229
fbxw5	OK	7.03390585966618e-05	3.80697296455901	0.0219686824605693	fbxw5	0.000260116515704339
coq4	OK	0.00625770586359382	2.49726860217493	0.0142656913193069	coq4	0.0177842000107055
kcnv2b	OK	0.0050543771327771	2.57208680400748	0.0132373556347723	kcnv2b	0.014587633011926
tcima	OK	9.20516425884401e-77	18.5061797987978	0.108165178991512	tcima	1.49846923899325e-75
abr	OK	0.00173016175735387	2.92357904875589	0.0167785118260315	abr	0.00538332196786697
ptger4b	OK	1.7336378177957e-20	9.20342215681123	0.0477872267692853	ptger4b	1.32420982493359e-19
hmgcra	OK	0.00414674484641069	2.63988200486839	0.0149298546673529	hmgcra	0.0121527643856289
prdx4	OK	1.79459620695457e-05	4.13244847524228	0.0239041769289803	prdx4	7.04931562396493e-05
rpl12	OK	3.63510563481313e-160	26.9410102061502	0.157691919012966	rpl12	1.04027925980742e-158
rhobtb4	OK	1.46358206409642e-10	6.30258790991755	0.0365402149783977	rhobtb4	8.02680786804489e-10
tcnbb	OK	0.000363633262311069	3.37908827274367	0.0182502951108634	tcnbb	0.00124228975918182
gal3st1a	OK	4.13909862730512e-260	34.4323356685848	0.201629141129103	gal3st1a	2.0547141284735e-258
cx27.5	OK	2.73598552608854e-07	5.00897840979684	0.0274915668726136	cx27.5	1.23850525737655e-06
C5H12orf65	OK	1.11834326706398e-11	6.68967376685016	0.0388542186594629	C5H12orf65	6.43316827949217e-11
rasa4	OK	7.65206192814477e-05	3.78608192285693	0.0215139646628446	rasa4	0.000282102265406855
gcnt4a	OK	9.10401075675678e-237	32.8357296511776	0.192198654644248	gcnt4a	4.06100437119458e-235
limk2	OK	1.21900227897193e-07	5.16240243150731	0.0298228913521084	limk2	5.67065654695626e-07
si:dkey-40c11.2	OK	9.72726092736144e-105	21.7024435037954	0.126901961174987	si:dkey-40c11.2	1.98901063774897e-103
txnrd2.2	OK	0.0072647783442838	2.44389742977276	0.0138896479895852	txnrd2.2	0.0203965425369975
specc1	OK	2.15279166069416e-32	11.7917388740431	0.0688168806262042	specc1	2.1230658592424e-31
rnf128a	OK	0.0059665642578222	2.51411567884925	0.0144282365674715	rnf128a	0.0170127160349573
ankdd1b	OK	0.000687164391919175	3.19998890412961	0.0178347314133013	ankdd1b	0.00226040206547983
RTKN	OK	9.06654866411855e-08	5.21752375573624	0.0302386341552666	RTKN	4.2555571702076e-07
pebp1	OK	0.000227978724892515	3.50537914894079	0.0201454706843836	pebp1	0.000797655080855612
clip2	OK	1.67569728909978e-06	4.64801813352665	0.0267614725411871	clip2	7.16738702276785e-06
OSBP2	OK	9.68571551161152e-87	19.7054235959267	0.115167733955076	OSBP2	1.72084480624089e-85
zgc:113208	OK	8.12924766606642e-29	11.0767971631943	0.0646352932345742	zgc:113208	7.48960344507972e-28
ccdc125	OK	1.10793289697322e-05	4.24194947883193	0.0235801499625472	ccdc125	4.44609729377648e-05
usp2b	OK	2.27065109036655e-08	5.46839450763246	0.0316675068186287	usp2b	1.10772213879293e-07
atp8b5a	OK	0	46.2248972947204	0.270653405232237	atp8b5a	0
atp5l	OK	8.80224955914013e-94	20.5097921564597	0.119974927392179	atp5l	1.67042841936475e-92
rsrc2	OK	0.000153330645200524	3.60960697401176	0.0208487058365494	rsrc2	0.000547400447811441
taok3a	OK	6.34512488690234e-18	8.54647719005292	0.0498022275305201	taok3a	4.50356556596134e-17
tecta	OK	0	48.1839432802381	0.28198210463593	tecta	0
vps37b	OK	2.78465679915697e-05	4.03035306009062	0.0232494165887851	vps37b	0.000107117632803538
ift22	OK	9.67412926831163e-11	6.36642678975328	0.0368273626162565	ift22	5.3512962627384e-10
pik3ip1	OK	0.0183462133848927	2.08916995724614	0.0118820668964716	pik3ip1	0.0470363288347182
slc12a9	OK	5.49878793582676e-10	6.09421501896857	0.0353723218226102	slc12a9	2.92922045820742e-09
lmo4a	OK	1.70759818761064e-18	8.69675169427214	0.0506335774735264	lmo4a	1.23046217203826e-17
iqgap2	OK	1.33676875903248e-84	19.4544213294558	0.113615355500171	iqgap2	2.33529310245193e-83
acaca	OK	1.07083044002671e-17	8.485839929693	0.049441928777622	acaca	7.55548784155066e-17
tbcelb	OK	5.80719412368563e-30	11.3107114782856	0.066003023418835	tbcelb	5.47707108678236e-29
sh2d3cb	OK	6.13479469726672e-74	18.1524963325429	0.103758557885702	sh2d3cb	9.73990932652181e-73
vma21	OK	5.01891230803973e-09	5.73008850714372	0.0332694698814576	vma21	2.54539981084863e-08
ftr82	OK	4.43406498364161e-13	7.14702102470673	0.0406221543427503	ftr82	2.69538251879029e-12
ENSDARG00000041723	OK	5.77905744436993e-197	29.9177712206729	0.174914094343416	ENSDARG00000041723	2.09357212533106e-195
ar	OK	1.51762262989828e-40	13.2797206103575	0.0775059891775029	ar	1.69240576996975e-39
abcb9	OK	0.0121178068607525	2.25337342442363	0.0128691418360186	abcb9	0.03244486811836
gnb2	OK	3.98865434508969e-11	6.50102779956489	0.0375641538774777	gnb2	2.24397611707929e-10
tmem203	OK	0.00181241370649268	2.90908978550717	0.0166633276644655	tmem203	0.00562458519535344
gsnb	OK	1.64066235435713e-07	5.10652773322881	0.0292981516801686	gsnb	7.55922892140761e-07
zgc:113436	OK	0.0195086756887121	2.06400384978136	0.0117034519910978	zgc:113436	0.0497369054042839
tescb	OK	3.00998155911919e-106	21.8616710677173	0.127849620143141	tescb	6.20536412052293e-105
ubac1	OK	6.89558723425032e-08	5.2680084711229	0.0305300402697658	ubac1	3.25485739739072e-07
gbgt1l4	OK	0.000181688901691087	3.56534504668355	0.0184673375384849	gbgt1l4	0.000642782821972038
camk2b1	OK	3.06812581873188e-100	21.220806455056	0.124116857448003	camk2b1	6.11405772255878e-99
glipr2	OK	6.57227576401754e-28	10.8880351767169	0.0619560412423506	glipr2	5.92663241468186e-27
fsd1l	OK	2.24015366882116e-11	6.58725556234757	0.0383121064182274	fsd1l	1.27170317761951e-10
ap1b1	OK	6.5363763753438e-71	17.7655181189353	0.103868181917248	ap1b1	1.00775165654055e-69
acacb	OK	0.000147597581970814	3.61948040361921	0.0208883842045936	acacb	0.000528136423412264
mink1	OK	2.59744539978936e-05	4.04668122993851	0.0234161111632264	mink1	0.000100270031917646
atxn2	OK	0.0194844999852324	2.06451408364616	0.0117929541758329	atxn2	0.0496905186933385
ftr83	OK	0.00745790358839494	2.43441683186925	0.0128379530798625	ftr83	0.0208802976387618
si:ch211-26b3.4	OK	2.36753757712515e-17	8.39309529019645	0.0485790804062089	si:ch211-26b3.4	1.65187307322434e-16
npffr2b	OK	0.00181711864679075	2.90827918597936	0.016427458542193	npffr2b	0.00563848834712183
ophn1	OK	7.55265962999517e-58	15.9895769926836	0.0933812687582076	ophn1	1.03237526861695e-56
AL935115.1	OK	0.00146621469293232	2.9747337571001	0.0169798267132907	AL935115.1	0.00460608222269677
tbx2a	OK	4.91184453718091e-52	15.1329206815091	0.088390843967273	tbx2a	6.33410651762285e-51
col27a1b	OK	1.3768679767384e-248	33.6536877487049	0.196690553444475	col27a1b	6.52489665573815e-247
si:dkey-13n15.2	OK	4.36612481169625e-05	3.9233600589197	0.0225866442787697	si:dkey-13n15.2	0.000165064670342955
si:dkey-13n15.2.1	OK	0.000239252285734548	3.49250950184075	0.0194037211985929	si:dkey-13n15.2.1	0.000835117731979863
kank1b	OK	5.4216757919429e-05	3.87090169658642	0.0222809888995011	kank1b	0.000203223669898649
ruvbl2	OK	0.000179429762787053	3.56862507790475	0.0205513999182277	ruvbl2	0.000635148930148069
tacr1a	OK	5.40225778988412e-08	5.31264539983854	0.0305693583797502	tacr1a	2.57323200711771e-07
tsc1a	OK	0.00183795939708729	2.90471139383265	0.0167018942940455	tsc1a	0.00569892444348562
spaca9	OK	1.33460507538747e-08	5.56185566717326	0.0321681608387969	spaca9	6.59775480869423e-08
ak8	OK	2.27792575690283e-30	11.392526471339	0.0664477737049408	ak8	2.16800762337878e-29
spns2	OK	3.13186734837564e-87	19.7624899834136	0.115525773411525	spns2	5.62412482495909e-86
ftr99	OK	0.00486109657694948	2.58555652009775	-8.17107904935435e-05	ftr99	0.0140654236020582
ebf2	OK	0.000166702354207172	3.58785883451622	0.0204609527058067	ebf2	0.000592858748420996
ewsr1b	OK	6.77124076136912e-08	5.27134881463227	0.0305872600556215	ewsr1b	3.19917517238527e-07
ercc6l	OK	1.99328430119382e-20	9.18841912487555	0.0505933534227265	ercc6l	1.52114594053662e-19
ifitm1	OK	5.90118962839175e-09	5.70255647038464	0.0328620220168942	ifitm1	2.98560893630985e-08
si:dkeyp-110c7.4	OK	4.63812176096401e-06	4.43339095292516	0.0236657245473586	si:dkeyp-110c7.4	1.91933104036987e-05
stard8	OK	0.00224908426097738	2.84093354215699	0.0162679404766135	stard8	0.00686667803415441
spns3	OK	1.16133291306472e-09	5.97346503717326	0.0344327681841792	spns3	6.09323038878599e-09
pdha1a	OK	8.04733249775696e-14	7.37778329434391	0.042914380593758	pdha1a	5.02087054221676e-13
map7d2a	OK	3.38962848762024e-09	5.79630340609521	0.0335609892483833	map7d2a	1.73393384524325e-08
emid1	OK	1.09087086941075e-30	11.4564918141928	0.0667211618608184	emid1	1.04338198493926e-29
tmem232	OK	8.41604635572075e-41	13.3237984431755	0.0775371941477675	tmem232	9.41463034768245e-40
si:dkey-79c1.1	OK	0.000209798252623807	3.52744147796878	0.0201692333870822	si:dkey-79c1.1	0.000736821573973971
tnks1bp1	OK	6.40351320288615e-13	7.09637652373874	0.0411864267259933	tnks1bp1	3.87098318020624e-12
zdhhc15a	OK	0	44.9131490750328	0.261330849193329	zdhhc15a	0
CR936408.1	OK	2.94746714572295e-289	36.3277818764722	0.206398975754558	CR936408.1	1.60630551904628e-287
adamts3	OK	4.45597932372033e-06	4.4420168325716	0.0255765977843627	adamts3	1.84670103597859e-05
PPP1CA	OK	0.017846645221131	2.10040430730769	0.0119493330554681	PPP1CA	0.0459481923640273
zgc:73226	OK	0.000376289010936337	3.36967165012995	0.0191280346598931	zgc:73226	0.00128290347003441
zgc:110796	OK	1.12242562523737e-20	9.25000359326789	0.0538750392363661	zgc:110796	8.60755215634008e-20
fgf10b	OK	3.48666355082058e-279	35.6841104090349	0.207680169426189	fgf10b	1.83628505368742e-277
arsk	OK	0.0158301921236702	2.14867232170096	0.0117569881698167	arsk	0.0412823349993017
CR854981.1	OK	9.26939330800985e-06	4.28179964660868	0.0242760798372239	CR854981.1	3.74374771771385e-05
wdr54	OK	0.000428989448782994	3.33337929767859	0.0191771454964203	wdr54	0.00145132746174641
scarb2a	OK	0.0010764253708663	3.06829348180852	0.0176695562056643	scarb2a	0.00344899126051218
GARNL3	OK	1.11491949154299e-229	32.3353413662795	0.189325409650314	GARNL3	4.8106569248694e-228
FQ377918.1	OK	0.000592959657489045	3.24224522212831	0.0185934413453016	FQ377918.1	0.00196912248689798
lmbrd2a	OK	0.000206803659835916	3.53124572366164	0.0203641669931015	lmbrd2a	0.000726915444254989
hspb15	OK	0.00743940492875901	2.43531550850641	0.0132734773885916	hspb15	0.0208378147663754
lnpep	OK	0.00779313164540983	2.41846223662909	0.0138569305055357	lnpep	0.0217363170025344
ccdc180	OK	0.00194217253615321	2.88740449686793	0.0165871702809166	ccdc180	0.00600497327439871
SCARF2	OK	2.41399901459566e-15	7.83131332332729	0.0453449973000884	SCARF2	1.58919488699839e-14
cita	OK	1.85604249816819e-28	11.0026149670362	0.0638705483705667	cita	1.69505025087717e-27
ca4a	OK	9.14745764507185e-07	4.77140071895921	0.0273547031492536	ca4a	3.99995841102924e-06
dlg4a	OK	7.25918861047366e-29	11.0869308555651	0.0646298729829913	dlg4a	6.69292384244075e-28
rgs3a	OK	2.42502466322513e-06	4.57117158779135	0.0260471712596121	rgs3a	1.02293359048276e-05
pou2f3	OK	0.00829032903251296	2.39587689443722	0.0120766218792523	pou2f3	0.0229875299763375
slc1a3a	OK	0	45.209956303383	0.264795573758117	slc1a3a	0
slc39a14	OK	1.58173838895739e-05	4.16136739039329	0.0240739411218142	slc39a14	6.25139518725728e-05
fam169aa	OK	1.01886462812331e-06	4.74964611070676	0.0273304314778264	fam169aa	4.43667141956285e-06
zgc:114041	OK	6.75402645834251e-52	15.1119508784333	0.0882240703608061	zgc:114041	8.69628604438564e-51
rgmb	OK	8.14749802249456e-06	4.31041295679745	0.024885355928574	rgmb	3.30287237913836e-05
aldh2.2	OK	0.00140787491808653	2.98716795486213	0.0171487482117224	aldh2.2	0.00443949890836619
lig3	OK	0.000479401554183976	3.30234427280926	0.0189342501133267	lig3	0.00161014436787756
map1b	OK	2.21257009484537e-26	10.5629537645682	0.0607900689770895	map1b	1.93669412387146e-25
vsig10	OK	0.000700168803546859	3.19458145788417	0.0183640706183721	vsig10	0.00229986002831711
C5H11orf1	OK	4.37583571537249e-227	32.1502844040969	0.188176478679114	C5H11orf1	1.86560927803866e-225
ccl19a.2	OK	6.66031672674276e-30	11.298679203158	0.04943427989827	ccl19a.2	6.26754804890069e-29
eif4e1b	OK	0.00491638216091942	2.58165564063046	0.0136057348621358	eif4e1b	0.0142122675728885
rufy3	OK	0.00262632529177349	2.7911168489038	0.0159452713809251	rufy3	0.00792290598549573
brinp1	OK	0	45.7422125718621	0.267859370995019	brinp1	0
kntc1	OK	7.05121829602293e-08	5.26390887824769	0.0301318087569595	kntc1	3.32769185736067e-07
dcc	OK	9.76572657047135e-52	15.0876363938656	0.0876520675515719	dcc	1.25611595379757e-50
si:ch211-157p22.10	OK	0.000639537702999145	3.22063364347309	0.0183502414162648	si:ch211-157p22.10	0.00211455693438216
ENSDARG00000102078	OK	1.62842688420033e-09	5.91809826475478	0.0342334632549378	ENSDARG00000102078	8.47302481527982e-09
wdr44	OK	0.0125373196917995	2.24025089234825	0.0127679671511725	wdr44	0.033435964612098
apooa	OK	2.38099116915328e-10	6.22675389954328	0.0361188110488385	apooa	1.29197116059531e-09
qsox2	OK	1.23622730850539e-08	5.57520012897953	0.03232761492107	qsox2	6.125910732738e-08
zgc:153704	OK	1.64779333716385e-132	24.4672784166154	0.142632556067073	zgc:153704	4.02617262859264e-131
h3f3c	OK	4.9639281531003e-33	11.9146530631831	0.0695409102440424	h3f3c	4.94597435890586e-32
PLPP7	OK	2.48829064532058e-06	4.56577255325803	0.0257978248331653	PLPP7	1.04909112323481e-05
mfsd10	OK	3.77467909315392e-15	7.7749225481052	0.0451194979928599	mfsd10	2.46956314914665e-14
gldc	OK	8.55215007867417e-10	6.02316113676864	0.0348291141139051	gldc	4.50880862928039e-09
gas1a	OK	3.63478249207555e-27	10.7311376161169	0.0624738083261074	gas1a	3.23236474969287e-26
C5H9orf78	OK	6.26482626269578e-10	6.07331474980258	0.0352365122436019	C5H9orf78	3.33021479176252e-09
chmp1b	OK	6.98975357164645e-15	7.69654455398372	0.0447850000706402	chmp1b	4.54306798775227e-14
KCNAB3	OK	9.21763707126845e-109	22.1243308286253	0.128988779097662	KCNAB3	1.95331313389373e-107
isca1	OK	1.93378999642107e-09	5.88975952144949	0.0341756142202349	isca1	1.00223653959644e-08
stpg2	OK	0.000747753293893301	3.17555404951274	0.0181868186811409	stpg2	0.00244686428985918
C5H9orf16	OK	6.60027129834981e-31	11.4999411340991	0.0670573102679076	C5H9orf16	6.34440955438387e-30
zgc:194398	OK	2.75745729392046e-06	4.54418141851982	0.0259525585701517	zgc:194398	1.15867745392712e-05
RASL10B	OK	0.000539976211168034	3.26882455562993	0.0186272556247636	RASL10B	0.00180248517147423
ift74	OK	1.09485511889086e-05	4.24461297681729	0.0245465825910927	ift74	4.39502369503202e-05
psat1	OK	1.31621569962501e-20	9.23296458346277	0.0534000207348529	psat1	1.00782563756565e-19
gjd1a	OK	0.0020210068234907	2.87486415325861	0.0157388141004783	gjd1a	0.00623181058525071
zgc:158463	OK	0	68.9402206726863	0.404003956802523	zgc:158463	0
ak1	OK	1.111942578002e-14	7.6369727667779	0.0443969717805512	ak1	7.17880208290809e-14
mia	OK	1.38893725506999e-12	6.9885268843919	0.0403818203476654	mia	8.27847552243214e-12
TNC	OK	0.00102803783042842	3.08201052699905	0.017554922918407	TNC	0.00330535851879055
aldh2.1	OK	7.99493224559516e-05	3.77516989619989	0.0217908358571106	aldh2.1	0.000293921332255206
zgc:158343	OK	4.5175623468385e-170	27.7736269011062	0.162056187995	zgc:158343	1.40509640785229e-168
erap2	OK	0.0160257195534276	2.14376851706379	0.0121214483939533	erap2	0.0417097968734298
CABZ01037298.1	OK	1.05203663010628e-44	13.9786617293352	0.0815288042373595	CABZ01037298.1	1.24697429220493e-43
mctp1a	OK	0	72.6729760674271	0.425923996071251	mctp1a	0
CU914811.1	OK	2.99096378799426e-05	4.01352258591457	0.0231659600243534	CU914811.1	0.000114684110127299
tlcd3a	OK	2.23250545612492e-14	7.54667788343514	0.0439091945843282	tlcd3a	1.4233641729297e-13
oafb	OK	0.00253519019277318	2.80252807007596	0.0149294081769103	oafb	0.00766735226717708
CABZ01076737.1	OK	6.60711857822739e-08	5.27584968526996	0.0305564939317735	CABZ01076737.1	3.12811814235283e-07
zgc:193711	OK	2.80898879040741e-05	4.0283077403156	0.0231849165671799	zgc:193711	0.000108003895685159
rabl6a	OK	0.000105625654885454	3.70516723002916	0.0213922996007012	rabl6a	0.000383757904684557
ABR	OK	3.45747814394968e-107	21.9602290944399	0.128431469275908	ABR	7.19896342115236e-106
trpm6	OK	0.000103378938719553	3.71061312414502	0.0208077385050492	trpm6	0.000376031139692466
CU927890.1	OK	0.00185790599127266	2.90133095982634	0.0165742095990456	CU927890.1	0.00575650046906615
spag8	OK	9.7443405740591e-09	5.61647998625912	0.032459293911988	spag8	4.85744430008128e-08
sgsm1a	OK	2.81138470037181e-47	14.3942547608718	0.0839605065042852	sgsm1a	3.437980636762e-46
npr2	OK	0.00247186174186937	2.81067799901527	0.0161515316770272	npr2	0.00749209309719782
supt4h1	OK	0.000178013297228958	3.5707013907985	0.0205853982923267	supt4h1	0.000630669212582355
rad51d	OK	1.48297940409156e-14	7.59979689311475	0.0410109298394178	rad51d	9.51300170961395e-14
LHX3	OK	3.78251859689394e-37	12.6807029292043	0.0739882412504523	LHX3	3.98485477292529e-36
gpr107	OK	0.000125678744671556	3.66087284341536	0.0211406800129691	gpr107	0.000452808342939242
hspa5	OK	1.04385223889116e-45	14.1421620119271	0.0826193356900659	hspa5	1.25688433125661e-44
hk2	OK	1.45360059536794e-92	20.3729351882729	0.11915375798491	hk2	2.72756836267057e-91
bicdl2	OK	8.44307358605328e-35	12.2495832255682	0.0714957995327779	bicdl2	8.63915966239876e-34
cnga2b	OK	2.99401197238525e-05	4.01328225568401	0.0222080216750888	cnga2b	0.000114783431924952
slc37a2	OK	0.00352941932563277	2.69405560924576	0.0154726469882948	slc37a2	0.0104783293550791
prodhb	OK	2.48775632087738e-31	11.5838583514421	0.0675057669813994	prodhb	2.41166137695572e-30
niban2b	OK	0.00306262304685556	2.74100024977743	0.0156176553560868	niban2b	0.00916520200090988
zgc:194908	OK	3.99735256309154e-07	4.93549665418737	0.028139406105271	zgc:194908	1.79041685553228e-06
CABZ01084961.1	OK	1.17881598056657e-106	21.9044200523056	0.128133946497928	CABZ01084961.1	2.44431247450979e-105
FO704648.2	OK	4.96399876639299e-09	5.73195438466241	0.0332280036274374	FO704648.2	2.51958868343199e-08
CABZ01077121.1	OK	3.10019735212621e-14	7.50377870367434	0.0435902344741836	CABZ01077121.1	1.96507831657274e-13
FQ377662.1	OK	0.00781485024163796	2.41744954956236	0.0127461070969105	FQ377662.1	0.0217871975875914
FP236476.1	OK	0.000451010099973572	3.31942813055134	0.0188423459802145	FP236476.1	0.00152049115065055
AL929048.1	OK	0.000470046314366972	3.30786754107835	0.0163234776472607	AL929048.1	0.00158062924947896
tbc1d16	OK	5.49026410603825e-52	15.1255940368762	0.0883693595351613	tbc1d16	7.07637176731481e-51
ndufa4l	OK	0	44.7638747070933	0.262240203830146	ndufa4l	0
SMIM22	OK	0.00398486103913521	2.65334984513355	0.0152047634686863	SMIM22	0.0117191171060068
tmc5	OK	0	66.4846658787122	0.389602297113763	tmc5	0
slc35b1	OK	0.00865919896262195	2.37987742033834	0.013603309284825	slc35b1	0.0239230172794765
xpnpep3	OK	0.00649186363342097	2.48421532543011	0.0141943961427982	xpnpep3	0.0183975276312718
rogdi	OK	0.00252657611116408	2.80362575270436	0.0160814617343603	rogdi	0.00764591218382089
st8sia6	OK	0.0191660649221842	2.07128543225105	0.0117174461771339	st8sia6	0.0489480523160387
si:ch73-233k15.2	OK	2.21922702738073e-20	9.17685984749289	0.0530468830479479	si:ch73-233k15.2	1.69151116903033e-19
tspan35	OK	1.21877928974808e-12	7.00684280835373	0.0403955710448761	tspan35	7.27812720693057e-12
cbx4	OK	7.06798951590304e-06	4.34173838920167	0.0250297398003803	cbx4	2.88297151275908e-05
cacng2a	OK	3.40721364175155e-23	9.85058779004396	0.0568587814377432	cacng2a	2.78045048128482e-22
rab40c	OK	0.00893424459991889	2.36833208794042	0.0135560755398111	rab40c	0.0246150761485182
rpl3	OK	2.87336185993061e-123	23.5830966983973	0.137999191404907	rpl3	6.73828891174935e-122
fam117aa	OK	1.50421985848041e-09	5.93113704565028	0.0341945731826861	fam117aa	7.84466145875709e-09
zgc:158403	OK	2.52099153271379e-06	4.56303323009881	0.0258880210859244	zgc:158403	1.06252079242774e-05
cbx8a	OK	0.00964625206972543	2.33983029297019	0.0133867233893803	cbx8a	0.0264199599187094
glyr1	OK	8.81344261307169e-16	7.95699428373029	0.0463149956293777	glyr1	5.88713543477469e-15
st13	OK	4.00011000291466e-12	6.83854380878193	0.039756307444433	st13	2.34296162764177e-11
rundc3aa	OK	1.74938628488293e-07	5.09438384838157	0.0294381146540899	rundc3aa	8.04095430431429e-07
rpl27	OK	1.21080520749249e-188	29.27107820567	0.171353027579076	rpl27	4.20411021421459e-187
vasnb	OK	0.0195832504378319	2.06243330847918	0.0116531290169131	vasnb	0.0499067302252728
slc25a39	OK	1.52658523907863e-05	4.1694638420284	0.024069192447896	slc25a39	6.04294415892345e-05
clec16a	OK	0.000191530083762128	3.5514875136297	0.0205095452503585	clec16a	0.000675882273343579
rbx1	OK	2.40373392436654e-39	13.0712411581151	0.0763269834763716	rbx1	2.63370654501507e-38
fzd2	OK	8.70618963130253e-05	3.75387201640101	0.0213777341983536	fzd2	0.000318947052268191
gadd45gip1	OK	5.91755092915906e-17	8.28475646001539	0.04815955812871	gadd45gip1	4.07995281196613e-16
nfixb	OK	0	48.8335130724184	0.286111653591913	nfixb	0
arhgap17b	OK	2.47906606404722e-05	4.05759184332224	0.0230625928170033	arhgap17b	9.60255054999998e-05
abca3b	OK	6.65304340736304e-05	3.82072330312907	0.0220898661949642	abca3b	0.000246760090515141
ccdc47	OK	0.0170078995150214	2.1198843557076	0.01210523980425	ccdc47	0.0440238547178183
nubp1	OK	0.000196580900918631	3.54463185516071	0.0204395847373981	nubp1	0.000692536060304828
dcaf7	OK	6.37330029618205e-05	3.83130378526777	0.0221199584291685	dcaf7	0.000236734723847959
RUNDC1	OK	8.4015495177833e-07	4.78850187942452	0.0277029758124762	RUNDC1	3.68278448787042e-06
srebf2	OK	0.0029848502739632	2.74944101882176	0.0157848491058915	srebf2	0.00894955286664078
rapgefl1	OK	0	38.6596629840602	0.226163017643101	rapgefl1	0
napsa	OK	0.00255451605613551	2.80007761288599	0.0159755018439638	napsa	0.00772207440145436
ppp1r9ba	OK	0.000859426175845744	3.134946876613	0.0180505563747077	ppp1r9ba	0.00279079725418095
si:dkeyp-72e1.9	OK	1.04968953275137e-193	29.6661541195881	0.173395886406992	si:dkeyp-72e1.9	3.72201794859182e-192
CR954963.1	OK	0.0106271854091257	2.30343517045768	0.0123969314815053	CR954963.1	0.0287827259098286
emp2	OK	0.0021411960825484	2.85657470461623	0.0158336833817538	emp2	0.00656845681172067
kcnh6a	OK	0.000247816888615149	3.48310508242059	0.0185925223430937	kcnh6a	0.000863810008438985
antkmt	OK	3.06926542317978e-05	4.00742129272756	0.0231163495564686	antkmt	0.000117492704408518
rrn3	OK	7.03872350689421e-24	10.0078529384308	0.0582312799171062	rrn3	5.83318213534978e-23
map3k3	OK	2.64094079310694e-13	7.21784255888626	0.0418966557031301	map3k3	1.62070366566458e-12
grin2aa	OK	1.0203686126577e-18	8.75501644781401	0.0504852900192242	grin2aa	7.39295397419531e-18
TST	OK	0.00244302507201413	2.81445181872028	0.0161267747460992	TST	0.00740916955363202
si:dkeyp-72e1.6	OK	1.32797933553136e-185	29.0312276732651	0.169598417259553	si:dkeyp-72e1.6	4.51099105182056e-184
si:dkeyp-72e1.7	OK	4.23563800341295e-07	4.92418478344301	0.0282979100802152	si:dkeyp-72e1.7	1.89376153214837e-06
pdxdc1	OK	9.5451807123348e-85	19.4716807956331	0.113765998312652	pdxdc1	1.66984044157377e-83
hirip3	OK	3.32255169851466e-06	4.50475029470975	0.026065029374395	hirip3	1.38752371364425e-05
nlk1	OK	0.00414249858632271	2.64022921283518	0.0151505001418225	nlk1	0.0121417393967642
il2rb	OK	2.92796067178733e-05	4.01854263816465	0.0231611366508219	il2rb	0.000112354272280785
triobpb	OK	7.98641351767367e-80	18.8822202623401	0.110352295107117	triobpb	1.34279946663019e-78
bcat2	OK	1.75767138945234e-123	23.6038911868916	0.138078491921393	bcat2	4.12962174903287e-122
ddx42	OK	3.02569720394014e-11	6.54246266969834	0.0379952483268165	ddx42	1.7118303589613e-10
nde1	OK	0.00679950687597803	2.46768445483361	0.0138985782429747	nde1	0.0192085686132402
nr1d1	OK	1.46292967871184e-67	17.327332918351	0.101260036822909	nr1d1	2.20265370063826e-66
ddx5	OK	1.9683748195874e-164	27.3027282455562	0.159824534278764	ddx5	5.83966726061971e-163
narfl	OK	0.00114900428495998	3.04874315882383	0.0174800505505283	narfl	0.00366701316609316
ndufa6	OK	6.06560424140683e-71	17.7697119407024	0.10388611977671	ndufa6	9.36321630097462e-70
hagh	OK	8.80098148101861e-09	5.6340561883084	0.0326897758949469	hagh	4.40470762123489e-08
abcc1	OK	2.3027645870063e-06	4.58199862803609	0.0265008097239488	abcc1	9.73162599994283e-06
smdt1a	OK	1.89114225431408e-57	15.9322930702587	0.0930664278254963	smdt1a	2.57797961791189e-56
cdipt	OK	3.65938228435238e-08	5.38316437597816	0.0312226411401043	cdipt	1.7601123270612e-07
CU681842.1	OK	0.000317474837725145	3.41622839803419	0.0196700570526128	CU681842.1	0.00109173891727458
CU914602.1	OK	0.00252298567533322	2.80408427712023	0.0147939390900423	CU914602.1	0.00763781281184984
tefb	OK	8.34263276170302e-18	8.51481764595215	0.049571555511805	tefb	5.89795433454972e-17
asphd1	OK	2.70162781803428e-22	9.64029484223108	0.0559832422658059	asphd1	2.16035431484215e-21
ezh1	OK	4.57241486244809e-10	6.12366284828704	0.0355515461954113	ezh1	2.4471790816975e-09
ppfia3	OK	1.76282925972913e-07	5.09293325013286	0.0291460386852063	ppfia3	8.09532271700854e-07
myh9b	OK	2.69198398176983e-19	8.90406133189541	0.051865307386869	myh9b	1.99189334235502e-18
cyp2k17	OK	1.11180634082447e-24	10.1888578207916	0.0419326868620137	cyp2k17	9.39079284303529e-24
igf2bp1	OK	6.42186712494987e-80	18.8937316491181	0.110380164242696	igf2bp1	1.0819206112592e-78
rbfox3b	OK	2.38696465549241e-13	7.23158392332055	0.0418545810665948	rbfox3b	1.46771687389108e-12
usp7	OK	2.74823959928287e-06	4.54488677469723	0.0263358400976751	usp7	1.15519145731761e-05
cntnap1	OK	7.16264337658574e-07	4.82042477547922	0.0274961690885955	cntnap1	3.15239302681931e-06
cabp5b	OK	0	70.5438644343642	0.412042752095409	cabp5b	0
slc6a16a	OK	4.47093686743193e-66	17.1295007478508	0.0999548205159836	slc6a16a	6.63206605500894e-65
PLEKHH3	OK	1.40840477010457e-06	4.68374459978484	0.0270968610842992	PLEKHH3	6.05925848322491e-06
tubg1	OK	0.0101556659622899	2.32054651064526	0.0132465535278022	tubg1	0.0276760941416072
zgc:112038	OK	0.0140597336899118	2.19561561852828	0.0118638039021436	zgc:112038	0.0371326868807837
tbc1d17	OK	0.00327390087583493	2.71900803493028	0.0156132844732747	tbc1d17	0.00975902747399593
snrnp70	OK	0.00726848610434313	2.44371333350143	0.0140114591091932	snrnp70	0.020403449008581
retreg3	OK	1.34935670745494e-13	7.30863419563918	0.0425179672583926	retreg3	8.35854294519098e-13
smurf2	OK	0.00692953916353287	2.46089535294739	0.0141164814534446	smurf2	0.0195362817465818
atp5mc1	OK	3.77983352250737e-115	22.7781013001245	0.133261911842251	atp5mc1	8.37072849608985e-114
lin7b	OK	0.00106665304365999	3.07101755371615	0.0175590527856792	lin7b	0.00342205338514363
znf1124	OK	4.17783676230764e-10	6.13801925820927	0.0290120818271805	znf1124	2.24222200373133e-09
wbp2nl	OK	1.34413707768178e-28	11.0316695839485	0.0643731694307155	wbp2nl	1.23474431661431e-27
zgc:193811	OK	0.00801230203712142	2.40835468941423	0.0137240260553084	zgc:193811	0.0222955266698409
akt1s1	OK	0.0110069723782215	2.29012718737878	0.0130689682375022	akt1s1	0.0297342446712968
kcnc3a	OK	5.09514976024197e-17	8.30254679253127	0.0483399057128463	kcnc3a	3.52165176011872e-16
si:ch1073-314i13.4	OK	2.67292057284493e-23	9.87495225704331	0.0575561647016495	si:ch1073-314i13.4	2.18692708357211e-22
zgc:195001	OK	9.25448194684451e-18	8.50278869026433	0.0422505112070138	zgc:195001	6.53706982038448e-17
txn2	OK	1.45722415078409e-10	6.30326241227402	0.0365578505032146	txn2	7.99368757899483e-10
emc10	OK	7.76924265221694e-07	4.80418275870348	0.0278381630196619	emc10	3.41478770120867e-06
kpna2	OK	0.000717997019421293	3.18731678281107	0.0181036745450038	kpna2	0.00235471837779597
SRCIN1	OK	6.54326758147305e-37	12.6376757783055	0.0738121318598468	SRCIN1	6.86618564252607e-36
ddx47	OK	0.00230096715072064	2.83365251024874	0.0162131473076054	ddx47	0.00701227151731287
clcn7	OK	0.0163655249556857	2.13536692802822	0.012190756767794	clcn7	0.0425147507890242
arf2a	OK	9.85560774987835e-135	24.6752739003274	0.144400404488289	arf2a	2.44866432786621e-133
fam171a2a	OK	6.85987954723507e-12	6.76083617426272	0.0390538138541933	fam171a2a	3.97803193082665e-11
fthl27	OK	0	51.2433714266447	0.300197284509157	fthl27	0
wbp11	OK	0.0109972896808996	2.29046147544237	0.0130426092505753	wbp11	0.0297144918097083
pdgfab	OK	0.000527313129743903	3.2755334458249	0.0187824644216807	pdgfab	0.00176185697048513
gosr2	OK	0.0189986549260224	2.07488375275338	0.0118269116873144	gosr2	0.0485749393513978
fthl31	OK	2.12249138852235e-44	13.9286165736675	0.0811152734250585	fthl31	2.5015861127817e-43
hoxb3a	OK	4.56976942083914e-41	13.3693012387479	0.0772724316005602	hoxb3a	5.13950424454986e-40
gpatch8	OK	0.00222611655550359	2.84420543893036	0.0163709368927462	gpatch8	0.00680733299950227
arhgdig	OK	0.00599954090977401	2.51217132959447	0.0141505017377536	arhgdig	0.0170989644232747
map3k14a	OK	8.71349375748009e-05	3.75366191485684	0.0216649190439133	map3k14a	0.000319167993872397
tmem104	OK	6.56195160221178e-15	7.70461433417108	0.0448569078384571	tmem104	4.26833328271529e-14
grb2b	OK	0.000870838002320109	3.13107512529499	0.0180361142598603	grb2b	0.0028256585400159
prkar1b	OK	0.0143492846790468	2.18760250310838	0.012500899567152	prkar1b	0.0378137514579022
CR936968.1	OK	0.011828800264515	2.26264469603752	0.0125571401179386	CR936968.1	0.0317405638285729
mybpc2a	OK	0	72.1478936039846	0.422452677766258	mybpc2a	0
eci1	OK	1.56404921839313e-05	4.16393453110268	0.0240382050474468	eci1	6.18440849462105e-05
usp43b	OK	1.2919362336557e-46	14.2884249911988	0.0828873120412687	usp43b	1.56916421712765e-45
crhr1	OK	2.33568408379066e-09	5.85847503645755	0.0338638728759286	crhr1	1.20504762907075e-08
dnase1	OK	1.53126489692274e-88	19.9142418636773	0.115455131860413	dnase1	2.78370411174447e-87
pih1d1	OK	0.0156758262412167	2.1525806264308	0.0122742002574775	pih1d1	0.0409266077943202
pold1	OK	0.00413386249146619	2.64093635209596	0.0150004203146606	pold1	0.0121192607646551
sun1	OK	2.42916177514943e-08	5.45641914239643	0.0316818345999393	sun1	1.18291873623196e-07
nfe2l1a	OK	0.00772611299753707	2.42160289034973	0.0135900331865616	nfe2l1a	0.0215661871434425
cbx1a	OK	2.70652325419463e-06	4.54810757793331	0.0263219033097109	cbx1a	1.13822901290732e-05
nat15	OK	0.000416729912013882	3.34143682118699	0.0191578329048922	nat15	0.0014127115840806
ddx39ab	OK	8.89943664161837e-19	8.7704278010364	0.0510621269405274	ddx39ab	6.46104770254071e-18
carhsp1	OK	1.42214582032575e-05	4.18558774653643	0.0241789592909665	carhsp1	5.64523044395848e-05
baxa.1	OK	0.00145938859543796	2.97616506022978	0.0170940201169601	baxa.1	0.00458923892361191
cpt1cb	OK	1.67953250196629e-08	5.52161047914517	0.0318748211332881	cpt1cb	8.26220570875055e-08
rps11	OK	8.99747905046956e-233	32.554648889711	0.190626411897864	rps11	3.92957843756483e-231
abat	OK	8.17102236760678e-16	7.96635696038675	0.0463899640377835	abat	5.46383995021431e-15
asic2	OK	9.36745682667986e-188	29.2011793903482	0.170851258848716	asic2	3.22572493390161e-186
sox10	OK	1.14363221151177e-70	17.7341007366055	0.10356703714746	sox10	1.75995800554872e-69
copz2	OK	5.3069955170887e-18	8.56708243582732	0.049869927420768	copz2	3.77528577235802e-17
gys1	OK	5.68333938096626e-53	15.2741695646779	0.0892225671864125	gys1	7.40902937813017e-52
polr2f	OK	1.72363813549934e-05	4.14170894495571	0.0239467533311073	polr2f	6.78121224401018e-05
lrrc4ba	OK	0.00240611111326234	2.81934195486832	0.0160026032219821	lrrc4ba	0.00731048351695233
kansl1b	OK	1.88569781465293e-10	6.26320695001123	0.036421377886138	kansl1b	1.02744095882491e-09
kcnj19a	OK	3.48117858586277e-07	4.96241072287584	0.02857401954942	kcnj19a	1.56397250840491e-06
rbfox1	OK	1.41939167495776e-87	19.8023937574145	0.115646034125799	rbfox1	2.55439554196096e-86
si:dkey-16p21.7	OK	0.000272426329420708	3.45767776144825	0.0194869919239655	si:dkey-16p21.7	0.000944730343373596
svilc	OK	1.47090554251804e-105	21.7891308418852	0.127385852304136	svilc	3.02246975781842e-104
il12rb2l	OK	3.98893482615614e-36	12.4947179757836	0.0729163677078857	il12rb2l	4.13559169383409e-35
rln3a	OK	6.80177342760196e-05	3.81526753480536	0.0187492660745651	rln3a	0.000251866555474968
si:dkey-16p21.8	OK	4.47859621299272e-114	22.6695167468446	0.132474053925476	si:dkey-16p21.8	9.8399586734018e-113
syt3	OK	8.72883430356581e-16	7.95818819535309	0.0462116750820557	syt3	5.83372826329222e-15
retsat	OK	0.000430429958318297	3.33244659226387	0.0191476042018639	retsat	0.00145511112373638
prr15la	OK	1.18762394150799e-100	21.2653867208142	0.124307198131071	prr15la	2.37610092495322e-99
RETSAT	OK	0.00131839798483392	3.00718458938973	0.0167934949875775	RETSAT	0.00417204229762705
atf4b	OK	2.62814625295631e-88	19.887165893783	0.11632695599577	atf4b	4.76047676411574e-87
stk17al	OK	1.37309787573128e-200	30.1951067878125	0.176616661416669	stk17al	5.09204003649518e-199
si:ch211-232p21.6	OK	3.14181276023662e-50	14.8568217808272	0.085781669413142	si:ch211-232p21.6	3.96586626819596e-49
nmt1a	OK	4.19579746271466e-08	5.35849954241378	0.0310492142879155	nmt1a	2.01194427300677e-07
plcd3a	OK	2.5565432612897e-08	5.44733236784997	0.0311678318456396	plcd3a	1.24374118023038e-07
prmt1	OK	3.50637989251788e-23	9.84770406287942	0.0574007865863338	prmt1	2.86044378540614e-22
cbx2	OK	1.7730310475588e-07	5.09183950890217	0.0294866444100416	cbx2	8.13769962124708e-07
zgc:171844	OK	2.36259395515245e-10	6.22796957715582	0.0294771479701455	zgc:171844	1.28226602861478e-09
atp6v0a1a	OK	0	38.1451462165535	0.223391051930181	atp6v0a1a	0
CU464118.1	OK	1.12583887266992e-114	22.7302270907054	0.132645735106727	CU464118.1	2.48447664603541e-113
arhgap23a	OK	3.74964838268091e-05	3.95986237908093	0.022757402150713	arhgap23a	0.000142510514410897
cavin1a	OK	3.10884957550905e-07	4.98432966635028	0.0287904133378463	cavin1a	1.40096620543657e-06
tufm	OK	2.89731887143588e-07	4.99793876950209	0.0289606577394444	tufm	1.30893650726304e-06
shank1	OK	1.31433845503477e-27	10.8247247771365	0.0629198496282843	shank1	1.17886049120811e-26
hspbp1	OK	6.00228472885812e-62	16.5673265118561	0.0967597206243058	hspbp1	8.53011767957733e-61
BX537342.1	OK	0.00980153233246987	2.33385979320156	0.0130268852807158	BX537342.1	0.0268042559226232
smarca4a	OK	2.91423497522532e-10	6.19500089364313	0.0360063439504817	smarca4a	1.57620186826157e-09
mvp	OK	5.698324179069e-37	12.6485445688249	0.0737823621163707	mvp	5.98957185933252e-36
aldoaa	OK	6.28966525480368e-46	14.1777627757708	0.0828276208430687	aldoaa	7.58420482312042e-45
jpt1b	OK	1.99843140258575e-09	5.88432313696104	0.0341925213625081	jpt1b	1.03466907954197e-08
ap2a1	OK	1.04160576962237e-12	7.02879743319984	0.040893649242934	ap2a1	6.23943011676539e-12
baiap2l2a	OK	0	41.7849655330229	0.244696851618672	baiap2l2a	0
nog1	OK	8.39666475792768e-06	4.30374717581261	0.0242485208420609	nog1	3.4016804915399e-05
sept12	OK	2.46873589495697e-177	28.3685881025549	0.165884362032091	sept12	8.00630532350276e-176
CR790377.2	OK	1.1144468885633e-17	8.48119672795795	0.0491013672377311	CR790377.2	7.85439107376813e-17
kmt5c	OK	0.0110522932099444	2.28856591139807	0.0130937381136228	kmt5c	0.029843810693677
sumo2b	OK	5.09904472926167e-12	6.80367863647872	0.0395604585860102	sumo2b	2.97481853194929e-11
elac2	OK	0.0170427619156973	2.11905849436059	0.0120583684488083	elac2	0.0441004333675285
maptb	OK	8.03828876971996e-25	10.2203461436906	0.0590007446100959	maptb	6.82397091663087e-24
stat3	OK	8.58274982408903e-198	29.981376542897	0.175536060666956	stat3	3.13645707492839e-196
CU972512.1	OK	0.0122873343393541	2.24802385743047	0.0117805998570789	CU972512.1	0.032863670602077
cldni	OK	3.30126108748772e-26	10.5253363366002	0.0596010781750423	cldni	2.8805887296286e-25
fbxl16	OK	3.77582406497171e-05	3.95820073480889	0.0228617573292301	fbxl16	0.000143461857357951
ldlra	OK	5.06481673352859e-18	8.5724613741153	0.0496370555544994	ldlra	3.60402755301811e-17
si:ch211-195b15.8	OK	9.35868824505254e-261	34.4754515122804	0.201853362803833	si:ch211-195b15.8	4.65501896061949e-259
CR792438.2	OK	0.00065332585062439	3.21451481907526	0.0182794305286152	CR792438.2	0.00215644841992137
scn4ab	OK	2.07634004180456e-05	4.09881654860932	0.0234673035870859	scn4ab	8.10018184064715e-05
b9d1	OK	0.0103834971222741	2.31219400990517	0.0131727008451231	b9d1	0.0282080504289434
mcm5	OK	0.000980848180299443	3.09597086406559	0.0173865937239833	mcm5	0.0031625573031417
ilf3b	OK	0.00355996912489034	2.69118180415307	0.0154712191465489	ilf3b	0.0105652735872944
ccdc97	OK	0.00211753658256839	2.8601000929954	0.0163709482982235	ccdc97	0.00650386236074576
llgl1	OK	1.32822221943508e-06	4.69573908928024	0.0271853370504284	llgl1	5.72805828643007e-06
phb	OK	3.7061061551738e-05	3.96265091482247	0.0228843205604119	phb	0.000140941103161487
hmox1a	OK	5.2537589454483e-10	6.10150374341362	0.0350436595813299	hmox1a	2.80226559581794e-09
arhgap27l	OK	2.20024409949324e-25	10.3451886372541	0.0602110192776803	arhgap27l	1.88912308873926e-24
stat5a	OK	0.0093450675272387	2.35165432041816	0.0134372201576589	stat5a	0.0256631157087718
cygb1	OK	0.00411112890016608	2.64280415950218	0.0147502132777531	cygb1	0.01205825323485
myo15aa	OK	0	69.3167810612542	0.406241098914554	myo15aa	0
prrg2	OK	7.72701851099104e-06	4.32211532462402	0.0247428363576205	prrg2	3.13901518476802e-05
elob.1	OK	2.93302228976772e-06	4.53116087180539	0.0261692556878218	elob.1	1.22976979063701e-05
BX510989.1	OK	0.000990884361849967	3.09295097257242	0.0175037196564834	BX510989.1	0.00319204318519877
mast1b	OK	0.000454534895137109	3.31725385164179	0.0190443745507079	mast1b	0.00153196225950419
si:ch211-76l23.4	OK	9.37510068209802e-203	30.3596305061562	0.150342256005189	si:ch211-76l23.4	3.52360418290128e-201
si:ch211-210g13.5	OK	8.43155926022903e-47	14.3181167566197	0.0834313228114106	si:ch211-210g13.5	1.02557379473402e-45
flr	OK	1.31717553778973e-14	7.61512563283792	0.0443086772095956	flr	8.46673680944889e-14
natd1	OK	0.00219070632233024	2.849310291457	0.0163089074710625	natd1	0.00670477558228504
BX510989.2	OK	0.0152931577557794	2.16241353123382	0.0108565562809847	BX510989.2	0.0400025220972072
prr12b	OK	9.27548446103064e-09	5.6249984045715	0.0326367206112197	prr12b	4.63386050126698e-08
znf598	OK	4.50011308970945e-07	4.91232596199218	0.0284345694393052	znf598	2.0098580980924e-06
hcrt	OK	5.83669902459869e-19	8.81779667502699	0.0466542141465979	hcrt	4.26465193377046e-18
wnk4b	OK	6.76940830120118e-95	20.6341923535962	0.120519754217916	wnk4b	1.29642701835609e-93
BX004999.1	OK	0.0100861229947086	2.32312858123036	0.0131922285318316	BX004999.1	0.0275075084153994
arl6ip1	OK	0	39.0053037134021	0.228450921918065	arl6ip1	0
si:dkey-66i24.9	OK	7.8551932884341e-07	4.80198066515067	0.0261779325335402	si:dkey-66i24.9	3.45113635730379e-06
pdap1b	OK	0.000431202344674481	3.33194767668184	0.01919717431196	pdap1b	0.00145724070890328
bud31	OK	2.16213685252222e-27	10.7790287589654	0.0628345963515601	bud31	1.9302923346111e-26
junbb	OK	1.04018626797303e-126	23.9161488846725	0.139918244746093	junbb	2.48346948112532e-125
rab5c	OK	0.000767139886478999	3.1681203788265	0.0182533824093659	rab5c	0.00250637688181181
hsp70.3	OK	0	44.1709118507209	0.258755310984125	hsp70.3	0
atp2a1	OK	4.6274423645302e-34	12.1108335380236	0.0706659154868556	atp2a1	4.67574980396645e-33
scaf1	OK	0.00304194340548538	2.74322561999229	0.015752336323011	scaf1	0.00910984102641418
cpsf4	OK	0.000106039473339554	3.70417604021267	0.0211528508935194	cpsf4	0.000385205558201606
atp5mf	OK	2.97661661478293e-94	20.562463586931	0.120276834087765	atp5mf	5.6616693411224e-93
hsp70.2	OK	0	66.1554728409726	0.387706857306578	hsp70.2	0
hsp70.1	OK	0	59.5172447244926	0.348767900841815	hsp70.1	0
slc29a4	OK	2.39807730193181e-12	6.91148227812537	0.0399683645700359	slc29a4	1.41619316565674e-11
hook2.1	OK	1.38006911148242e-08	5.55600825579685	0.0321733660791266	hook2.1	6.81847705079874e-08
tnrc18	OK	5.57057561105477e-06	4.39375081850433	0.0254540212873443	tnrc18	2.29233026909934e-05
si:ch73-367p23.2	OK	8.21318168165757e-27	10.6555540369451	0.0608533915904531	si:ch73-367p23.2	7.25242168289798e-26
tanc2a	OK	9.71022366732272e-186	29.041996638462	0.170026081423144	tanc2a	3.30292533400425e-184
rcn3	OK	0.0113188450492329	2.27949444015095	0.0127373542612789	rcn3	0.0305044212577101
jpt2	OK	0.000621684249500948	3.2287400699962	0.018541990989481	jpt2	0.00205878500009766
actb2	OK	2.65218778100425e-119	23.1934293813904	0.135722391909977	actb2	6.07193566045622e-118
nosip	OK	0.000513267978116791	3.28315118737195	0.0188541012073293	nosip	0.00171721806264645
cacna1ia	OK	0	61.0411371574668	0.357571311342111	cacna1ia	0
si:dkey-16l2.16	OK	6.52362323900269e-10	6.06681405355198	0.0351036100874161	si:dkey-16l2.16	3.46484557157963e-09
BX322574.1	OK	0.00299600949578112	2.74821780626623	0.0157740146928447	BX322574.1	0.00898086357165334
si:ch73-1f23.1	OK	3.89427091733105e-05	3.95081529129813	0.0196887290023442	si:ch73-1f23.1	0.000147715959489442
mapk8ip3	OK	2.35855920052605e-16	8.11856916902615	0.0472853079938593	mapk8ip3	1.60104848627098e-15
si:dkey-204f11.64	OK	0.00133512021897233	3.00335125432934	0.0168649786742963	si:dkey-204f11.64	0.00422069719664784
rnf25	OK	8.43948255333592e-08	5.23078727669914	0.0303185481395127	rnf25	3.97015177574738e-07
gcdhb	OK	3.75374258722221e-05	3.95960175481554	0.022822957262444	gcdhb	0.00014264449434451
smurf1	OK	9.80215578357859e-05	3.72406152585396	0.0215143871533829	smurf1	0.000357373826844868
hdac5	OK	2.90689775188413e-100	21.2233444433079	0.12412043261349	hdac5	5.79737627223415e-99
znf385c	OK	1.78223187136806e-22	9.68290349561562	0.0560568297591007	znf385c	1.43247100940448e-21
dnajc7	OK	0.000651267904617778	3.21542047104669	0.0185297270460465	dnajc7	0.00215050515027174
si:dkey-16l2.17	OK	6.90437355556543e-145	25.6038856865524	0.149645064897602	si:dkey-16l2.17	1.82195516488916e-143
arpc1a	OK	0.00115682470691828	3.04670462508937	0.0175189880526753	arpc1a	0.00369103201956653
fam83fa	OK	1.04288399548864e-12	7.02862628310755	0.0408847892452298	fam83fa	6.24559457307807e-12
lfng	OK	0	45.6205776051562	0.26693270131408	lfng	0
rabep2	OK	0.0122748704952214	2.24841497795762	0.0128319090677191	rabep2	0.0328338378622178
mrtfaa	OK	1.44110410063842e-09	5.93817015793	0.0343380342069079	mrtfaa	7.52176529229745e-09
ttyh3a	OK	2.13616803393676e-22	9.66437165057087	0.056241185543658	ttyh3a	1.71365108616834e-21
mrps7	OK	0.005397225915723	2.54928347500535	0.0145851818429931	mrps7	0.0155004074328399
snx8a	OK	0.000200129825055781	3.5399125423377	0.0193947696153108	snx8a	0.000704444620095954
mhc1zaa	OK	0.00307660916050242	2.73950283990234	0.014437288114985	mhc1zaa	0.0092026625754248
desi1a	OK	5.75339277519891e-08	5.30116210907965	0.0307352648553409	desi1a	2.73580810852544e-07
srrm2	OK	3.17906858403211e-06	4.5141161308697	0.0261440200126239	srrm2	1.32915394151269e-05
yipf2	OK	0.00199676266984299	2.87867271901383	0.016529165898672	yipf2	0.00616387678491491
mafk	OK	7.00080763815016e-58	15.9943031848649	0.0932973962843335	mafk	9.57987154371104e-57
nme3	OK	2.18368432095079e-19	8.92724817941781	0.0519962641103133	nme3	1.62056785796079e-18
fus	OK	2.63478740486661e-07	5.01622815314658	0.0290677030301436	fus	1.19496586069538e-06
cbx7a	OK	9.16784177757296e-85	19.4737467094069	0.113877865693552	cbx7a	1.60494850224844e-83
foxk1	OK	2.73112038377192e-08	5.43556715457938	0.0315175747666874	foxk1	1.32444480774783e-07
psmg3	OK	6.26215519768902e-08	5.28567349932279	0.0306353316215632	psmg3	2.96647710980473e-07
lsm12a	OK	1.11760513550752e-16	8.20874033754841	0.0477550494619464	lsm12a	7.65707656245913e-16
ints1	OK	0.0121739840951005	2.2515935634549	0.0128681745179131	ints1	0.0325917991542155
cyp3c4	OK	0.000153360416737637	3.60955661002273	0.020198283229075	cyp3c4	0.000547428775052803
cyth4a	OK	5.81684547529967e-11	6.44403673167774	0.0367624468973857	cyth4a	3.2484406152882e-10
si:ch211-237i5.4	OK	2.0042601729199e-05	4.10698800668711	0.0236480415621838	si:ch211-237i5.4	7.83483522141415e-05
mrps34	OK	0.000167777334553582	3.58618211003382	0.0206742053501511	mrps34	0.000596258860210342
nags	OK	5.76437080884642e-24	10.0275976703677	0.0581925237592249	nags	4.79134654532397e-23
b4galnt2.2	OK	2.63210526399111e-07	5.0164239302747	0.0287552985674894	b4galnt2.2	1.19406889002883e-06
cyp3c1	OK	6.60075766404672e-19	8.80400784803842	0.0511525925647104	cyp3c1	4.81170089793507e-18
ep300b	OK	4.42001998094487e-05	3.92040467273825	0.0226704440887783	ep300b	0.000167001478375745
tlcd4b	OK	7.98535959275835e-90	20.0616465301951	0.117278132467131	tlcd4b	1.46334049437762e-88
micall2a	OK	2.97013326567416e-161	27.0336903533973	0.158098478865646	micall2a	8.58803585203984e-160
ttc25	OK	0.000336978639740469	3.39995993350702	0.0195734076972548	ttc25	0.00115516443588867
rnd2	OK	6.77692351526358e-51	14.9592531955881	0.0872542310082276	rnd2	8.64143924741315e-50
sdk1a	OK	1.30999143755931e-180	28.632868743417	0.167618780452784	sdk1a	4.32676882057632e-179
hsd3b7	OK	0	54.0128898503371	0.31644687139381	hsd3b7	0
vat1	OK	3.10751905733761e-06	4.51893871079544	0.0260885372118906	vat1	1.30032373974957e-05
card11	OK	8.16166728377286e-18	8.51735868410101	0.0494498027962885	card11	5.7732741855785e-17
eif3ba	OK	2.4725869944237e-22	9.64938429909257	0.0562195298934776	eif3ba	1.98099339607567e-21
zfand2a	OK	1.88106937525842e-41	13.4351679384133	0.0784378698054682	zfand2a	2.12896289699112e-40
gna12a	OK	1.52052160938623e-39	13.1060302757041	0.076351556303079	gna12a	1.67110724356438e-38
cnp	OK	0.0133699018803454	2.21529527789639	0.0124671669807797	cnp	0.035448976228279
zgc:92162	OK	1.09655455865329e-194	29.7421150935586	0.172131286270627	zgc:92162	3.91031667580074e-193
mylpfa	OK	1.72125713993996e-59	16.2234586215606	0.0946256876684333	mylpfa	2.38662584298423e-58
atp6v0ca	OK	1.18645958090919e-182	28.7964969606694	0.168581750373157	atp6v0ca	3.96578069784167e-181
sstr3	OK	5.45790466907346e-09	5.71584829095379	0.0301455020598909	sstr3	2.76412549795965e-08
zgc:153733	OK	1.45836954570732e-13	7.29818569663728	0.0423159797722601	zgc:153733	9.01822055780383e-13
elof1	OK	9.95205120426967e-14	7.34943862302336	0.0427174277583376	elof1	6.19691931544552e-13
cd2bp2	OK	8.18874573807887e-11	6.39195797615026	0.0371315676988656	cd2bp2	4.54670358599998e-10
tnrc6c1	OK	0.000141753767452518	3.62992140181653	0.0209796364068417	tnrc6c1	0.000508387009480283
dnaja3a	OK	0.003940035988792	2.65716561917471	0.0152210908381316	dnaja3a	0.0115957692184817
pam16	OK	3.43856372071038e-12	6.86018531952334	0.039850500535043	pam16	2.01829440211868e-11
prr14	OK	0.00740261326219493	2.4371087389607	0.0139354957321359	prr14	0.0207417136324986
si:dkey-16l2.20	OK	2.66724167027032e-07	5.01387433517703	0.0280908502811106	si:dkey-16l2.20	1.2089148694993e-06
eif3d	OK	8.77669767517409e-09	5.6345324052443	0.0327130907837261	eif3d	4.39343119047403e-08
il4r.1	OK	6.23641592132411e-26	10.4652640334475	0.0603861172320337	il4r.1	5.40410337821204e-25
aclya	OK	2.00687357387338e-05	4.10668689608873	0.0237574138130636	aclya	7.84382812962767e-05
sept9a	OK	4.03310389375302e-90	20.0955827188654	0.117501412408543	sept9a	7.40160186767894e-89
ubtf	OK	7.50080734928221e-06	4.32866466630925	0.0250620101712911	ubtf	3.0505798092011e-05
zgc:194659	OK	0.0101531919261473	2.32063810445988	0.0132364610181194	zgc:194659	0.0276723601213946
dicp1.1	OK	0.0153750347189405	2.16029203171275	0.0122560791750856	dicp1.1	0.0401999108645305
arl5c	OK	1.89220826708109e-40	13.2631913183356	0.0774061022134083	arl5c	2.10731981552447e-39
si:ch73-141c7.1	OK	0.000577633159868841	3.24970044006074	0.018715760615137	si:ch73-141c7.1	0.00192026066632436
col1a1a	OK	3.05862640917102e-123	23.5804517979012	0.137343988858438	col1a1a	7.16604723845873e-122
AL929222.2	OK	1.84800312804558e-07	5.08398320963008	0.0291330534728212	AL929222.2	8.46737451906724e-07
kat7a	OK	0.000941814577077464	3.10799239451275	0.0177670170494794	kat7a	0.00304413997327939
mettl26	OK	0.00123892186360414	3.02603408017538	0.0173172428073062	mettl26	0.00393245533029781
slc4a1a	OK	0.000357980742806393	3.38339281317612	0.0189083876118594	slc4a1a	0.00122347910585051
cacnb1	OK	1.93239625529872e-68	17.4433865080088	0.101773173807819	cacnb1	2.9253165292321e-67
hs3st4	OK	3.24797128427504e-78	18.685506473247	0.108904466015793	hs3st4	5.37448132841525e-77
thraa	OK	0.000937329346739803	3.10940293502502	0.0179090392969647	thraa	0.00303081509008386
pdpk1a	OK	6.15973650475101e-05	3.83968009774402	0.0221839131617424	pdpk1a	0.000229481995003125
rhot1a	OK	7.18095387203907e-09	5.66901704802579	0.0328911272882093	rhot1a	3.61194487596604e-08
aoc2	OK	2.93489978579431e-06	4.53102570286358	0.0258426718722609	aoc2	1.23035121622203e-05
ube2ia	OK	1.43074103332201e-08	5.549707338397	0.0321264134548555	ube2ia	7.06048168589559e-08
baiap3	OK	0	42.1924900946995	0.246661312157068	baiap3	0
nsfa	OK	1.12992144380115e-26	10.6258335117862	0.0619583802236558	nsfa	9.94243617923872e-26
selenow2b	OK	2.94937358084341e-05	4.01682509136618	0.0226472808185958	selenow2b	0.000113141310326187
tob1a	OK	3.68972155400488e-36	12.5009177244805	0.0730075084263083	tob1a	3.82854427306905e-35
C3H17orf75	OK	7.9344276083391e-05	3.77706307810538	0.0217232929420939	C3H17orf75	0.000291868181531112
gpr146	OK	5.51082491566772e-06	4.39609345007294	0.0254489701037271	gpr146	2.26848718901271e-05
gper1	OK	5.9877791277012e-06	4.37803234180104	0.0239557398826825	gper1	2.45796029068841e-05
h3f3b.1	OK	9.94531984879587e-34	12.0479198235532	0.0703398976297155	h3f3b.1	1.00168430409588e-32
unkl	OK	0.0164745904806158	2.13270198526185	0.0121858289998345	unkl	0.0427803510211889
shisa9b	OK	6.1649282077602e-46	14.1791686518881	0.0821533158357026	shisa9b	7.44095258740204e-45
rps15a	OK	5.13309655876059e-196	29.8447617411895	0.174713021203744	rps15a	1.84887352918921e-194
selenow2a	OK	5.0647807933437e-13	7.12873489600909	0.0414294013572363	selenow2a	3.07133501955329e-12
mrtfbb	OK	0.0042857496466417	2.62868787764144	0.0150907990174178	mrtfbb	0.0125226113921051
polr3k	OK	0.000121416076431416	3.66970329793032	0.0211353371973839	polr3k	0.000438143028653977
cdip1	OK	4.76651075881852e-98	20.9822235141422	0.122670533920248	cdip1	9.35721677469237e-97
rpl19	OK	3.06961312003637e-194	29.7075238862231	0.173920506689748	rpl19	1.08997353124917e-192
rarab	OK	4.3615793666181e-30	11.3357997511767	0.0661705573447579	rarab	4.12605408082072e-29
xylt1	OK	0	49.6239157239191	0.290725943640255	xylt1	0
tyk2	OK	2.62398029641179e-28	10.9713556187179	0.0639706401658531	tyk2	2.38335369749084e-27
ngfra	OK	5.45816907941102e-22	9.5678390829657	0.0552516680842024	ngfra	4.33008989404287e-21
psmd11a	OK	0.0020977912846805	2.86306970128759	0.0164159166352665	psmd11a	0.00644874674624837
nxph3	OK	0.00507013805240048	2.57100876310096	0.0144780625849909	nxph3	0.0146297526284102
kdelr2a	OK	0.00408008733708062	2.64536953867997	0.0151862344646744	kdelr2a	0.0119742108936167
spop	OK	2.8617199766148e-07	5.00032283250525	0.0290108710161693	spop	1.29355315711786e-06
si:dkey-283b1.6	OK	2.59118795932377e-05	4.04724604407363	0.0226327430774286	si:dkey-283b1.6	0.000100059289821761
pde4a	OK	1.11145995940879e-05	4.2412362599396	0.0244851398295472	pde4a	4.45953740755744e-05
abi3a	OK	9.26415903320983e-31	11.4706403118515	0.0659598109455274	abi3a	8.88119322384464e-30
si:dkey-248g21.1	OK	3.41094345969305e-10	6.1701647596955	0.0357645793676394	si:dkey-248g21.1	1.83929751755313e-09
itga3a	OK	6.60737664599496e-24	10.0141087817174	0.058198028193599	itga3a	5.48114907804261e-23
prkcsh	OK	0.00113495408803199	3.05243773549653	0.0175843424332022	prkcsh	0.00362678955167292
rps2	OK	2.49748253665128e-202	30.3273748265603	0.1775503360259	rps2	9.35865317059953e-201
ca10b	OK	0.000320531594688765	3.41361830591375	0.0195244550635028	ca10b	0.00110164608544731
ccdc103	OK	0.0103971222842061	2.31169957984505	0.0131961191787599	ccdc103	0.028238944587515
elavl3	OK	0	44.2138438870804	0.257879111132477	elavl3	0
smarce1	OK	3.21405835984909e-07	4.9778900038496	0.0288488246008484	smarce1	1.44629741559966e-06
rpl23	OK	1.75133904374533e-231	32.4634186976169	0.190083164533103	rpl23	7.56971008407786e-230
ndufb10	OK	1.0587029248734e-54	15.5316854569132	0.090752282145244	ndufb10	1.40056061338529e-53
mrpl12	OK	1.92568867003683e-13	7.26068400415348	0.0422344514624723	mrpl12	1.18816365417557e-12
hgs	OK	0.0160210779466398	2.14388433216883	0.0122499227184697	hgs	0.0417020457942386
gaa	OK	0.00121738370548185	3.03133278019839	0.016537068549772	gaa	0.00386865330677039
zgc:103625	OK	0.00730131384223834	2.44208698531223	-9.42765503628495e-05	zgc:103625	0.0204853538568632
cldnk	OK	9.82195965218631e-21	9.26425754961424	0.0528474488207785	cldnk	7.54602226542013e-20
sgsm3	OK	1.59760686338892e-10	6.2889981039218	0.0365484230787176	sgsm3	8.74653995595037e-10
epn3a	OK	6.54945252519368e-10	6.06617910648879	0.0351276228099974	epn3a	3.4778272686736e-09
prkcbb	OK	0	42.9140775086874	0.251367809398687	prkcbb	0
gas7a	OK	1.42148653292867e-16	8.17980765778093	0.047381832750632	gas7a	9.70458766176168e-16
pmp22a	OK	2.90595494970903e-14	7.51225126622545	0.0435545256562227	pmp22a	1.84335487434857e-13
rbbp6	OK	5.18203253809048e-06	4.40943501790348	0.0255432399800021	rbbp6	2.13840944357844e-05
cdc42ep4a	OK	1.90518977536161e-15	7.86101342064348	0.0456123665542439	cdc42ep4a	1.25919331607013e-14
tnrc6a	OK	3.59143890628458e-42	13.5571970709163	0.0792004282038861	tnrc6a	4.11865425167649e-41
sdk2a	OK	1.39994166348197e-06	4.68497922348071	0.027056248320446	sdk2a	6.0238821767644e-06
ttyh2l	OK	1.25479446295928e-06	4.7073491260639	0.0268339384019739	ttyh2l	5.42258962108707e-06
ndufab1b	OK	4.46472543379513e-58	16.0222938346911	0.0936202646350931	ndufab1b	6.12622889435196e-57
cacna1aa	OK	9.72700157048336e-35	12.2380971818792	0.0710148893599892	cacna1aa	9.93668306318041e-34
aatka	OK	1.87255756971032e-05	4.12266662979187	0.0231700438278742	aatka	7.34060136279406e-05
baiap2a	OK	1.20372349037055e-152	26.2913633710823	0.153681209480648	baiap2a	3.30154750329314e-151
slc27a1a	OK	0.00213636669167384	2.85729142945638	0.0164232846139643	slc27a1a	0.00655607499003201
dctn5	OK	0.00961839293013759	2.3409103466441	0.0133423833546149	dctn5	0.0263494145301737
gng13b	OK	0.00150680656652115	2.96634592844402	0.0160213925522121	gng13b	0.00472353805378501
atp13a1	OK	2.60978004948967e-05	4.0455716359347	0.0233728309012616	atp13a1	0.000100715172507168
caskin1	OK	4.4716473749561e-25	10.2770390575057	0.0599071778108692	caskin1	3.809029155378e-24
pbx4	OK	1.82278255356821e-22	9.68060380288476	0.0564620439363403	pbx4	1.46459409728851e-21
brd4	OK	1.19129986604133e-05	4.225642518886	0.0244725639801327	brd4	4.76995629161318e-05
pet100	OK	0.00167376703168901	2.93388018258995	0.0168619463697996	pet100	0.00521562035020656
stxbp2	OK	0.0194847681922869	2.0645084201246	0.0117667288473078	stxbp2	0.0496905186933385
gtf2f1	OK	0.00175873650615604	2.91847568978295	0.0167809219753495	gtf2f1	0.00546544756078167
nr5a5	OK	0.0112515968606723	2.2817654142684	-0.000108318293556627	nr5a5	0.0303394946434541
notch3	OK	3.29162878221668e-295	36.7028251417124	0.214730999677315	notch3	1.83372982091977e-293
crlf3	OK	0.00239395588781678	2.82096706791132	0.016085853094469	crlf3	0.00727708016874972
rdh8a	OK	5.32315885734986e-07	4.87929971018153	0.0275629920046449	rdh8a	2.36481072824568e-06
col5a3a	OK	0.0190385837153724	2.07402307985716	0.0116993090466262	col5a3a	0.0486621385767405
olfm2a	OK	2.19083364863552e-33	11.9826358966949	0.0697178009697129	olfm2a	2.19337095597619e-32
eif3g	OK	1.20023200266762e-29	11.2468370795587	0.0656091707066851	eif3g	1.12270955503263e-28
icam3	OK	0.00167413236506491	2.9338124396236	0.0163434842296699	icam3	0.00521611039768981
rhbdf1a	OK	1.02104688895818e-19	9.01098745890336	0.0525251524024893	rhbdf1a	7.65220462161215e-19
nprl3	OK	0.00623445509667588	2.49858822263896	0.0142947341582392	nprl3	0.0177261602380138
hbba2	OK	5.53395053351001e-10	6.09319513407761	0.0353833220267123	hbba2	2.94732538611775e-09
hbaa2	OK	0.000367785708081535	3.37596550262389	0.0194610013526809	hbaa2	0.00125562030721722
hbba1	OK	2.71159403933681e-19	8.90325605469259	0.0518671020192821	hbba1	2.00521979268833e-18
hbaa1	OK	9.88554072409119e-124	23.6282168176604	0.138246357830862	hbaa1	2.32695418227457e-122
coil	OK	0.0181966365390112	2.09250602811051	0.0118240385437678	coil	0.0467066889247959
hbba1.1	OK	8.66787042451789e-100	21.1719178803488	0.123839713086284	hbba1.1	1.72456225136698e-98
si:ch211-5k11.8	OK	2.36980661260905e-25	10.3380752047352	0.0602903649343446	si:ch211-5k11.8	2.03245576365024e-24
hbae3	OK	0.011357964349692	2.27817876882439	0.0127276552801113	hbae3	0.0305966911973382
kank2	OK	1.08138226849388e-13	7.33832933912724	0.0426494642249713	kank2	6.72684170939777e-13
dock6	OK	1.3494786017699e-21	9.47378012205568	0.05523226069681	dock6	1.06150232405929e-20
ighv1-4.1	OK	8.15645636344291e-05	3.77018110305228	0.0217085427003003	ighv1-4.1	0.000299464271492604
SLC16A3	OK	0.00181797963943449	2.90813105487541	0.0165957410579786	SLC16A3	0.00564046182932962
FP326652.1	OK	3.19100612735888e-22	9.62319073678536	0.0560000343331777	FP326652.1	2.5460004012336e-21
prkcab	OK	0	45.9732845353295	0.269253863069133	prkcab	0
csnk1da	OK	6.89738955337096e-77	18.5217241230805	0.108305585166218	csnk1da	1.12498802025671e-75
zgc:112148	OK	0.0117747023957603	2.26440193959242	0.0129412252645938	zgc:112148	0.0316173965680501
ush1ga	OK	5.91862020277127e-07	4.85834268696386	0.0281026684374077	ush1ga	2.62052083827752e-06
socs3a	OK	8.4341218910369e-170	27.7511682432259	0.162414308843553	socs3a	2.61353524952292e-168
cyth1a.1	OK	0	40.9300506167033	0.239703950716488	cyth1a.1	0
usp36	OK	0.00214937028299231	2.85536491375797	0.0164157137946369	usp36	0.00658952716452663
timp2b	OK	0.00828915351422797	2.39592887256394	0.0134895745528116	timp2b	0.0229868129920554
tmc6a	OK	0.000973898556352369	3.09807867603195	0.0172287002402695	tmc6a	0.00314217025858398
uqcrc2a	OK	2.75659555822842e-25	10.3235739869645	0.0601724969175209	uqcrc2a	2.36014665468676e-24
vwa3a	OK	6.73586145299699e-24	10.012204047177	0.0582784295270589	vwa3a	5.5858852386762e-23
sdr42e2	OK	1.6117650724707e-100	21.2510532549851	0.124241563518006	sdr42e2	3.21954889257116e-99
cdr2a	OK	0.00307660319803819	2.73950347696063	0.0156829420898897	cdr2a	0.0092026625754248
luc7l3	OK	4.78319576384699e-06	4.4267490544642	0.0256336489315976	luc7l3	1.97871179214324e-05
zgc:174268	OK	0.0110984642006232	2.28698106376865	0.0129994980225484	zgc:174268	0.0299580335548762
si:ch73-364h19.1	OK	7.77395133795334e-10	6.0385772120671	0.0349617791139967	si:ch73-364h19.1	4.1106345937809e-09
gps1	OK	0.0112916916436109	2.28040999650828	0.0130116365787166	gps1	0.0304345143332633
si:ch211-214b16.4	OK	1.79383789079056e-11	6.62017759590531	0.0384886849136348	si:ch211-214b16.4	1.02227147270354e-10
aimp2	OK	0.000567754479101738	3.25460320035103	0.0187109685536389	aimp2	0.00189017756130166
pvalb8	OK	0	48.5854690838344	0.284566996071238	pvalb8	0
pvalb1	OK	9.31439602651051e-06	4.28072203488113	0.0246175053587451	pvalb1	3.75950078873921e-05
pvalb5	OK	1.32873261961484e-11	6.66440124367673	0.0319266745267161	pvalb5	7.61197395820941e-11
lmtk2	OK	3.95475156475112e-31	11.5440670422007	0.0673713301460826	lmtk2	3.82048813012508e-30
tecpr1b	OK	4.66300961362494e-256	34.1605403322369	0.20000173426314	tecpr1b	2.26984442726143e-254
nptx2a	OK	2.95805740491353e-162	27.1187659247794	0.158372827522196	nptx2a	8.60273098419691e-161
gprc5ba	OK	1.29046749467719e-37	12.7647150190439	0.0698940936932295	gprc5ba	1.37079362813824e-36
proza	OK	0.00146005479656254	2.97602510174699	0.0171224060380661	proza	0.00459075802019644
sox8b	OK	6.36328971475211e-07	4.84397680761631	0.0272166968536344	sox8b	2.81094819135014e-06
FP017215.1	OK	1.64434789457828e-60	16.3670312111111	0.0951509763827382	FP017215.1	2.30291381950742e-59
prkar1aa	OK	0.00105246367801717	3.07501391099871	0.0176937050195377	prkar1aa	0.0033812907784458
slc16a6b	OK	5.24815416550572e-05	3.87882301618641	0.0223524045008385	slc16a6b	0.000197043547663716
hlfa	OK	2.07342675846405e-79	18.8317676140914	0.110109988682048	hlfa	3.46524902719569e-78
ifnphi3	OK	0.0039392124965741	2.65723608272322	0.0129763785444715	ifnphi3	0.0115947068306465
BX284638.2	OK	1.56502965154975e-67	17.323451841834	0.101045575048382	BX284638.2	2.35496568635658e-66
mrc2	OK	5.05869566137039e-14	7.43936045241731	0.0428881188195882	mrc2	3.18554236460423e-13
pmm1	OK	1.21320656447711e-13	7.3229151060007	0.0422226451104896	pmm1	7.52260088174045e-13
tmem106c	OK	0.000611894965624544	3.23327663880925	0.018560912843922	tmem106c	0.00202851030061382
zgc:123297	OK	7.02983734383007e-22	9.54163587567106	0.0392639138885484	zgc:123297	5.56109158638296e-21
foxj1a	OK	0	51.4519755955168	0.301405116282114	foxj1a	0
rnf213a	OK	1.36521236805984e-26	10.6081706599137	0.061889443076768	rnf213a	1.20001784203689e-25
ndel1b	OK	9.81238959250204e-11	6.36424881445618	0.0369607410000901	ndel1b	5.42538144451773e-10
fn3krp	OK	0.00160987690945957	2.94593948842531	0.0167320610539177	fn3krp	0.00502715548620355
crebbpb	OK	7.15160198950287e-18	8.53265070796023	0.0497002891852641	crebbpb	5.06450593996744e-17
CABZ01050944.1	OK	1.27979321562836e-06	4.70332487913542	0.0270240986934204	CABZ01050944.1	5.52490720209875e-06
cep112	OK	1.02162292793618e-29	11.2610435913612	0.065527671331527	cep112	9.5670770192126e-29
ier2a	OK	4.05540093106705e-133	24.5244165786229	0.143285313463179	ier2a	9.95737962202938e-132
ARHGAP44	OK	9.71153217452471e-06	4.27142179350115	0.0246267812088972	ARHGAP44	3.91412218783215e-05
ppap2d	OK	0	37.9572351374044	0.222185415254912	ppap2d	0
znf1124.1	OK	0.000131168826743358	3.64990466759172	0.0207628514368471	znf1124.1	0.000471978084918794
CSDC2	OK	2.09715281748837e-09	5.87634231069148	0.0331850628759624	CSDC2	1.08488493565035e-08
PITPNC1	OK	0.0018187997392703	2.90799001856547	0.0151810336964931	PITPNC1	0.00564230796482703
adgrl1a	OK	0	40.8784457738142	0.239387400488062	adgrl1a	0
soul5	OK	0.0192000268346675	2.07055871516139	0.0114933438930829	soul5	0.0490247986064657
znf1024	OK	0.00842390960964805	2.39001206737679	0.0134128015345231	znf1024	0.0233192347619553
dnajb1a	OK	6.26658504994295e-46	14.1780208022178	0.0828066767464233	dnajb1a	7.56001061679595e-45
alyref	OK	2.88252024160167e-17	8.36993422395661	0.0487315185785572	alyref	2.00393510639801e-16
baiap2l1b	OK	8.9211331753033e-41	13.319447637293	0.0777791236241622	baiap2l1b	9.97519569900439e-40
arhgdia	OK	2.144238867663e-10	6.24314908901583	0.0362735927061873	arhgdia	1.16602872393587e-09
SMIM10	OK	0.0073640085981129	2.43899879921491	0.0138817754044175	SMIM10	0.020645082928438
samd1a	OK	0.00134008889063859	3.00222071229729	0.0172139956234249	samd1a	0.00423587043240685
prkacaa	OK	0.000486811305287274	3.29804000713379	0.0190095957190146	prkacaa	0.00163262509862832
nbr1b	OK	6.78988022000768e-14	7.40037778186877	0.0430555031766497	nbr1b	4.25113654433997e-13
bahcc1a	OK	2.48692683115686e-17	8.38731160320543	0.048874236480456	bahcc1a	1.73372549305538e-16
CABZ01079818.1	OK	0.00711865132973219	2.4512196952399	0.0134875167120443	CABZ01079818.1	0.0200199091524631
LO017965.1	OK	2.44028912678038e-11	6.57453398358467	0.0369461169932692	LO017965.1	1.38312475964859e-10
zgc:110249.1	OK	0.000175721299141177	3.57409405093896	0.0203983762817612	zgc:110249.1	0.000623165546494579
camsap3	OK	5.73176671947194e-05	3.85732364032192	0.0222802548151901	camsap3	0.000214186695785455
s1pr2	OK	1.52419114700998e-07	5.12043094564164	0.0294373383822218	s1pr2	7.04460690715213e-07
CABZ01053748.1	OK	1.07234583913005e-21	9.49775243624431	0.0527968693314035	CABZ01053748.1	8.44303952297466e-21
znf750	OK	9.24617182012034e-27	10.6445257952926	0.0529352710219596	znf750	8.15308763132595e-26
CT573476.1	OK	0.01377779070743	2.2035560446936	0.0125057388303831	CT573476.1	0.0364533440891358
asf1ba	OK	4.36704500055562e-05	3.92330931105599	0.0204536094860585	asf1ba	0.000165074564413343
MGAT5B	OK	2.29107546672459e-10	6.23278492071185	0.0354895525801973	MGAT5B	1.24425846783619e-09
pctp	OK	0.000268381245683464	3.46170633608105	0.0198866494432374	pctp	0.000931733755440902
nfil3-6	OK	4.76278540373025e-13	7.13719350313985	0.0413967394406872	nfil3-6	2.89169937723695e-12
cfap70	OK	5.6549871708615e-43	13.6921579493709	0.0799200880311905	cfap70	6.52993428771658e-42
BX005085.5	OK	0.00155720235830114	2.95621444374973	0.0164814006603841	BX005085.5	0.00487298788169407
trip10a	OK	0.00464178869127663	2.60143086878701	0.014863951808757	trip10a	0.0134953654592596
cdc42ep1b	OK	0.00453842752753846	2.60914583337875	0.0134670284788525	cdc42ep1b	0.0132187567895738
apnl	OK	9.38476982467143e-13	7.04333265321613	0.0394225982057345	apnl	5.63108651830273e-12
CABZ01044156.1	OK	2.90527720119175e-10	6.19548576530156	0.0330799235816651	CABZ01044156.1	1.57169603272931e-09
ubald2	OK	5.75953759681419e-47	14.3445828859164	0.0837721679028914	ubald2	7.01583323685786e-46
BX511021.1	OK	1.39263332506659e-20	9.22691954933403	0.0513085761488683	BX511021.1	1.06536236881582e-19
notum1a	OK	0.00611383540235058	2.50550488838989	0.0133678425489443	notum1a	0.0174068983193102
metrnla	OK	2.43388791072947e-20	9.16690873882474	0.0531294791269042	metrnla	1.85343669605337e-19
CABZ01087224.1	OK	2.00339854156563e-66	17.1761433297758	0.100352418206751	CABZ01087224.1	2.98769768224324e-65
FP326649.1	OK	1.32955481249856e-62	16.6577337306916	0.0972723675904562	FP326649.1	1.90243205448211e-61
plppr2a	OK	7.03320560641277e-10	6.05471771490882	0.0346314496170992	plppr2a	3.72366275284396e-09
kdelr3	OK	6.96284506275086e-05	3.8094843840886	0.0217318985875586	kdelr3	0.000257602660681968
CABZ01038494.1	OK	6.96469580732574e-06	4.34497123296857	0.0251272504120089	CABZ01038494.1	2.84268901325055e-05
tbcd	OK	7.97799544767314e-07	4.79887427735289	0.0278093301663167	tbcd	3.50324694128075e-06
mmd	OK	2.44661333480952e-37	12.7148059591285	0.0741823661799408	mmd	2.58793880549957e-36
fthl30	OK	4.71826018763675e-50	14.8295487208517	0.0862169778400035	fthl30	5.93487529572833e-49
mgrn1b	OK	0.00126666324097451	3.01933212260249	0.0173636752084217	mgrn1b	0.0040169488662859
ccnf	OK	5.18057696761499e-08	5.32027320433253	0.0305352865288339	ccnf	2.46998638267669e-07
drc3	OK	5.08969113216048e-05	3.88627586925397	0.0223936044368274	drc3	0.000191380631456624
dnm2a	OK	1.3076900355634e-303	37.2257534845181	0.218022128366179	dnm2a	7.43366927472535e-302
fam20ca	OK	7.54287817910116e-19	8.78902941874429	0.0509593200488493	fam20ca	5.48730159813949e-18
pkn1b	OK	3.96840806234293e-10	6.14618609395976	0.0356566933102576	pkn1b	2.13210505175472e-09
BX004816.1	OK	0.0102242927030451	2.31801353624913	-0.000105143506678025	BX004816.1	0.0278087006371528
rasd4	OK	8.2703593752035e-306	37.3614257775679	0.21749721244661	rasd4	4.75526695360038e-304
CR392045.1	OK	2.67949929601412e-74	18.197935217057	0.106043376155156	CR392045.1	4.28668588715878e-73
mcrip1	OK	1.44929072957173e-05	4.18129136502537	0.0241125860598035	mcrip1	5.74695813028057e-05
dsn1	OK	1.14034152653917e-08	5.58923791175431	0.0316680580790965	dsn1	5.65971525020997e-08
TOM1L2	OK	0.000262369896579446	3.46779891101203	0.0199369748240038	TOM1L2	0.000911748119954275
BX908797.1	OK	3.4493872078048e-41	13.3902074979533	0.078005567938142	BX908797.1	3.88990948773993e-40
rai1	OK	6.02490463160875e-06	4.37668468880642	0.0251478431771311	rai1	2.47279525556319e-05
fthl28	OK	0.00135416764191811	2.99903799669022	0.017037376810745	fthl28	0.00427821406619347
ubald1b	OK	5.99928730781615e-17	8.2831236296212	0.0481462542709991	ubald1b	4.1351700170372e-16
slc25a19	OK	0.000176921981270332	3.57231165081642	0.0205120013296904	slc25a19	0.000627068732993913
atp5pd	OK	1.37772872119141e-74	18.2343428705369	0.106614957563833	atp5pd	2.2055096622955e-73
mcoln1b	OK	0.000436026927521291	3.32884990960445	0.0191432385457169	mcoln1b	0.00147235439736412
hs3st3b1a	OK	0.0159170334229514	2.14648797870808	0.0115568912364801	hs3st3b1a	0.0414829099573729
CABZ01089980.1	OK	0.003777735274134	2.67131500881491	0.0150807841640969	CABZ01089980.1	0.0111534619699994
LO018183.1	OK	0.00542814946503261	2.54729058918093	0.0145332125809249	LO018183.1	0.0155785093232859
AL954138.2	OK	0.000149929774427671	3.6154213124201	0.0177533751935108	AL954138.2	0.000536098918146808
BX649558.1	OK	0.0105545070790873	2.30602896080134	0.0119192285858	BX649558.1	0.028604425726015
BX537310.2	OK	1.04992410630759e-161	27.0720771607607	0.158429430136439	BX537310.2	3.04635965521122e-160
BX323991.1	OK	1.44819938745468e-11	6.65174415324181	0.0384296378272598	BX323991.1	8.28879233883592e-11
CABZ01068050.1	OK	1.1984762825218e-32	11.8409593758515	0.0677245193830833	CABZ01068050.1	1.18706447754007e-31
dmrt2b	OK	1.0461284446392e-07	5.19094832810017	0.0278614042437219	dmrt2b	4.8927973840784e-07
lrp8	OK	4.36089290920776e-119	23.1720181021061	0.135502328709553	lrp8	9.94751813839211e-118
prkcda	OK	2.90258770301137e-05	4.02059329081601	0.0228861950241912	prkcda	0.000111431808769973
esyt1b	OK	1.39878658435305e-05	4.18934782189896	0.0241197378799871	esyt1b	5.55988281007555e-05
cadpsb	OK	0	39.9993517531528	0.23414064591148	cadpsb	0
iqcb1	OK	9.83583958229567e-16	7.94339779475733	0.0462118782511075	iqcb1	6.55958133781777e-15
nr4a2b	OK	0	52.3424348360869	0.306287408430233	nr4a2b	0
cplane2	OK	0.00492199115661373	2.5812620642781	0.014773646042839	cplane2	0.0142268414971924
iqcb1.1	OK	4.58356177392535e-10	6.12327506712949	0.0354945209901535	iqcb1.1	2.45262134707651e-09
wwc3	OK	4.65894114316085e-18	8.58207256941845	0.0499384339394162	wwc3	3.32086993226896e-17
krt4	OK	3.40270995093008e-138	24.9957169714495	0.146082073400386	krt4	8.65137279511826e-137
eif6	OK	4.09851202311133e-19	8.85730743564369	0.0515880570588753	eif6	3.01395124398293e-18
twf2a	OK	2.49869480071643e-200	30.1752942915177	0.176568504447645	twf2a	9.25255243119057e-199
cish	OK	0.0090961668784832	2.36168008410949	0.0134346174413071	cish	0.0250281865302047
zgc:158846	OK	1.19379558993763e-06	4.71750109332185	0.0217820823786562	zgc:158846	5.16878439449853e-06
si:ch211-194e18.2	OK	0.000140151502187208	3.63285458039824	0.0207512110185443	si:ch211-194e18.2	0.000502712549482204
cep170ab	OK	1.41935448799533e-06	4.68215774282007	0.0263204780231051	cep170ab	6.10427134320725e-06
si:ch211-239j9.1	OK	9.28842716444249e-10	6.00978585400056	0.0348616655907195	si:ch211-239j9.1	4.887732589954e-09
mmp24	OK	1.61708500689827e-85	19.5624110507546	0.114396324898185	mmp24	2.83884482058353e-84
tomm6	OK	3.67360203956725e-13	7.17281326433438	0.0417094409684764	tomm6	2.24180938485666e-12
tspo	OK	8.44301854193853e-05	3.7615548643138	0.021674347742508	tspo	0.000309713245285129
slc25a38b	OK	0.00294105282449985	2.75428202866037	0.0157454354034508	slc25a38b	0.00882562284622776
fam83c	OK	2.57027273683574e-29	11.1794536850172	0.0652033932920474	fam83c	2.39265381506629e-28
lpp	OK	2.16318958344824e-272	35.2434260672147	0.206254808448687	lpp	1.12742203050861e-270
dnpep	OK	1.7122272226836e-05	4.14323183845276	0.0239152095205831	dnpep	6.74055028980136e-05
sdc4	OK	6.18367655524094e-161	27.0065881290686	0.158056787948516	sdc4	1.78182284555558e-159
slc15a1b	OK	6.34865927257316e-07	4.8444338906817	0.0278398461966417	slc15a1b	2.8049795436048e-06
slc35d1a	OK	5.31496581412738e-09	5.72035883124877	0.0330707402093909	slc35d1a	2.69336725276651e-08
ola1	OK	2.50298759928799e-12	6.90540683859649	0.0401513950448855	ola1	1.47710442859112e-11
lmo4b	OK	2.67334728626805e-10	6.20857575983587	0.0360850304419644	lmo4b	1.44810162315155e-09
oser1	OK	5.49456721002552e-15	7.72725388507089	0.0449591691774531	oser1	3.58240066028946e-14
gga3a	OK	0.00767629694994348	2.42395296183303	0.0138003990923548	gga3a	0.0214438475861526
bcl11ab	OK	5.78854651643132e-25	10.2521241496913	0.0596562237660558	bcl11ab	4.92409476146647e-24
srgap3	OK	0	41.1676219186191	0.241009256094212	srgap3	0
matn4	OK	6.03298754242737e-241	33.1271961624746	0.193411777046571	matn4	2.7548445300749e-239
frs3	OK	5.80293686159397e-06	4.38486311270112	0.0222040222098863	frs3	2.38559895348146e-05
ttc4	OK	0.0011167806896974	3.05727918479279	0.0172645874065648	ttc4	0.00357099172321735
kalrnb	OK	2.97362144123969e-67	17.2864824870249	0.100873568570748	kalrnb	4.46916762052984e-66
tprg1	OK	2.97041596410356e-09	5.81841482324374	0.0331274996576406	tprg1	1.52430956019794e-08
scn8ab	OK	0.000587532217422652	3.24486469340446	0.0186860303194144	scn8ab	0.00195187452406155
myh9a	OK	1.03417283262865e-17	8.48988899457293	0.0491080330492653	myh9a	7.29889604199538e-17
plcxd1	OK	4.42766983175678e-10	6.12878373382214	0.0352547588700299	plcxd1	2.37173621821177e-09
ccdc85al	OK	3.81068307462767e-08	5.37587025290424	0.0310321412380227	ccdc85al	1.8321828538136e-07
wdr78	OK	0.000619836514984224	3.22959127587355	0.0185665378097297	wdr78	0.00205375120197456
rad18	OK	0.0022971580329057	2.83418198185902	0.0162724411770207	rad18	0.00700236560395343
hs2st1b	OK	3.40142246002309e-09	5.79572057722783	0.0336600867282467	hs2st1b	1.73914459821169e-08
si:dkeyp-3f10.17	OK	2.87106693770713e-09	5.82409956235569	0.0272040255594276	si:dkeyp-3f10.17	1.47428875586604e-08
serbp1a	OK	2.72967808794244e-40	13.2356892938017	0.0773126547355431	serbp1a	3.03191404460031e-39
ptprnb	OK	0	50.4998739225404	0.295754523519908	ptprnb	0
cyldl	OK	0.000834299495904929	3.1436411893563	0.0178673034707896	cyldl	0.0027123659788407
dock9b	OK	0	44.0246757037843	0.257900696136193	dock9b	0
grb2a	OK	3.07539788364803e-38	12.8759123180789	0.0750510568428954	grb2a	3.3018051197076e-37
dzip1l	OK	4.93564871437315e-14	7.44261297498104	0.0432612124414858	dzip1l	3.10883863368393e-13
[truncated: 7,841 more rows]
