# Supplementary material for: Single-cell transcriptomic profiling of the zebrafish inner ear reveals molecularly distinct hair cell and supporting cell subtypes
Source: eLife. 2023 Jan 4;12:e82978. doi: 10.7554/eLife.82978 (PMC9851615; doi:10.7554/eLife.82978)
Supplement: Supplementary file 7. [file elife-82978-supp7.xlsx]

## Sheet: seurat_clusters6
feature	group	avgExpr	logFC	statistic	auc	pval	padj	pct_in	pct_out
tectb	seurat_clusters6	3.22021	2.91658	40312	0.876005	7.18386e-45	7.14196e-41	80.8271	10.9827
otogl	seurat_clusters6	2.07762	1.87519	37312	0.810813	1.08028e-33	6.44387e-30	67.6692	8.67052
si:ch211-133n4.6	seurat_clusters6	2.82824	2.50959	37434.5	0.813475	1.82013e-33	9.04759e-30	70.3008	10.4046
nr4a2b	seurat_clusters6	1.63187	1.38991	34561.5	0.751043	7.55237e-24	2.04772e-20	58.6466	10.4046
tecta	seurat_clusters6	1.54145	1.32848	33523	0.728476	2.59694e-21	5.16359e-18	52.6316	8.67052
stm	seurat_clusters6	3.60672	1.41265	34596	0.751793	3.58863e-19	5.0967e-16	89.8496	68.2081
nr4a3	seurat_clusters6	1.84198	1.45648	33040	0.71798	2.00313e-18	2.38973e-15	55.2632	15.0289
tnn	seurat_clusters6	0.764908	0.710227	29825.5	0.648127	7.93208e-14	6.22564e-11	31.9549	2.31214
atp1b1a	seurat_clusters6	1.77565	0.943511	31736	0.689643	1.41317e-12	8.78079e-10	65.0376	35.8382
nocta	seurat_clusters6	1.24096	0.83735	30964.5	0.672878	2.30116e-12	1.37264e-09	51.1278	17.9191
sat1a.2	seurat_clusters6	1.1357	0.780782	30480	0.66235	1.64413e-11	8.3112e-09	47.7444	16.185
pax2a	seurat_clusters6	0.545034	0.520555	28377.5	0.616661	3.99405e-11	1.95283e-08	24.4361	1.15607
igf2b	seurat_clusters6	0.653931	0.530269	29178	0.634056	8.60081e-11	3.94645e-08	33.0827	6.35838
bricd5	seurat_clusters6	0.927518	0.691319	29511	0.641293	2.05786e-10	9.16053e-08	38.3459	10.9827
cldnb	seurat_clusters6	1.74111	0.939127	30526.5	0.66336	3.34044e-10	1.42327e-07	56.015	32.3699
otomp	seurat_clusters6	0.578702	0.51393	28150	0.611717	8.38182e-10	3.3185e-07	25.188	2.89017
mdkb	seurat_clusters6	0.847875	0.587755	28904	0.628102	7.45902e-09	2.34174e-06	37.218	12.1387
adgrg6	seurat_clusters6	1.00967	0.631648	29030	0.63084	1.94352e-08	5.52053e-06	41.7293	16.185
eif1	seurat_clusters6	1.29221	0.678289	29451	0.639989	3.49344e-08	9.55889e-06	51.5038	28.3237
sdc4	seurat_clusters6	1.69344	0.746534	29758.5	0.646671	4.64189e-08	1.22517e-05	62.0301	42.1965
nr4a1	seurat_clusters6	0.671621	0.504449	28166	0.612065	5.15293e-08	1.34812e-05	30.8271	9.24855
si:ch211-80h18.1	seurat_clusters6	0.790877	0.695427	27301	0.593268	1.07622e-07	2.62429e-05	22.1805	4.04624
ier5	seurat_clusters6	0.984466	0.581027	28806.5	0.625983	1.08227e-07	2.62429e-05	42.8571	19.0751
atf3	seurat_clusters6	1.10982	0.655655	28587.5	0.621224	2.83888e-07	6.41436e-05	41.7293	19.6532
tob1a	seurat_clusters6	1.383	0.646898	29129.5	0.633002	3.24246e-07	7.16343e-05	57.5188	30.6358
tob1b	seurat_clusters6	1.00165	0.573667	28570.5	0.620855	3.88468e-07	8.39569e-05	42.4812	20.8092
btg2	seurat_clusters6	2.25163	0.632015	29454.5	0.640065	4.72733e-07	9.72363e-05	74.0602	61.2717
ptp4a2b	seurat_clusters6	0.80532	0.513601	28113.5	0.610924	4.78294e-07	9.77062e-05	35.3383	13.8728
slc43a2b	seurat_clusters6	1.05106	0.602323	28405.5	0.617269	7.61968e-07	0.000146617	42.1053	20.2312
ptmab	seurat_clusters6	1.57121	0.689344	28840.5	0.626722	1.03767e-06	0.000185713	53.7594	34.6821
jdp2b	seurat_clusters6	2.15071	0.754648	29165	0.633774	1.01856e-06	0.000185713	68.4211	49.1329
sec61g	seurat_clusters6	1.60014	0.696228	28901	0.628037	1.03003e-06	0.000185713	56.7669	35.2601
tuft1a	seurat_clusters6	0.94383	0.533321	28293.5	0.614835	1.09374e-06	0.000193023	41.3534	19.6532
rpl32	seurat_clusters6	2.12766	0.817561	28994	0.630058	1.38678e-06	0.000240468	62.782	43.9306
rpl39	seurat_clusters6	2.35803	0.881991	29034	0.630927	1.42245e-06	0.00024382	65.7895	45.6647
glulb	seurat_clusters6	1.0925	0.564917	28418	0.617541	1.49655e-06	0.000254333	45.1128	24.2775
rps20	seurat_clusters6	1.79761	0.884051	28372	0.616541	1.83522e-06	0.000300744	45.1128	24.2775
rpl13	seurat_clusters6	2.09309	0.774936	28941	0.628906	1.90289e-06	0.000308444	64.6617	44.5087
ncam1a	seurat_clusters6	1.01142	0.596284	27898	0.606241	2.59586e-06	0.00039908	36.8421	16.763
rps15a	seurat_clusters6	1.97928	0.797649	28614.5	0.621811	3.84314e-06	0.000561871	56.7669	38.7283
rpl27	seurat_clusters6	1.83504	0.704299	28577.5	0.621007	4.94539e-06	0.000690738	57.1429	41.0405
tns1b	seurat_clusters6	1.20261	0.562328	28251.5	0.613923	5.24415e-06	0.000714814	48.4962	27.1676
rpl34	seurat_clusters6	1.98937	0.742663	28618	0.621887	5.50155e-06	0.00074246	60.9023	43.3526
si:ch211-195b13.1	seurat_clusters6	1.31683	0.577851	28390	0.616933	5.63144e-06	0.000756567	53.3835	31.7919
rpl35	seurat_clusters6	2.07051	0.712863	28642.5	0.622419	5.89461e-06	0.0007828	62.0301	47.3988
rps23	seurat_clusters6	1.85016	0.711272	28535.5	0.620094	6.30123e-06	0.000824273	59.7744	39.3064
eef1a1l1	seurat_clusters6	2.56095	0.713002	28782.5	0.625462	6.56286e-06	0.000851031	75.188	61.2717
BX248331.2	seurat_clusters6	1.14635	0.573708	27936.5	0.607078	7.55598e-06	0.000954903	42.4812	21.9653
mt-co2	seurat_clusters6	1.91126	0.87698	28145.5	0.611619	7.83345e-06	0.00098165	47.7444	27.7457
rps24	seurat_clusters6	1.99038	0.705713	28505.5	0.619442	8.44694e-06	0.00104971	60.5263	43.9306
rpl10a	seurat_clusters6	1.82107	0.71678	28358.5	0.616248	9.77644e-06	0.00119144	56.7669	36.9942
si:ch73-335l21.4	seurat_clusters6	1.0221	0.574284	27627.5	0.600363	1.00178e-05	0.00120964	36.8421	17.9191
rpl9	seurat_clusters6	1.65624	0.677658	28267	0.61426	1.0378e-05	0.0012381	53.3835	34.6821
h3f3d	seurat_clusters6	1.23925	0.57064	28026	0.609023	1.15053e-05	0.00136168	45.8647	28.9017
rpl8	seurat_clusters6	1.90718	0.726399	28333	0.615694	1.26229e-05	0.00145475	57.5188	40.4624
junba	seurat_clusters6	1.80808	0.631047	28376	0.616628	1.50171e-05	0.00164663	61.6541	45.6647
zgc:171772	seurat_clusters6	1.8403	0.823818	27899	0.606263	1.56639e-05	0.00171127	45.8647	25.4335
si:dkey-222f2.1	seurat_clusters6	1.93664	0.620118	28418	0.617541	1.61484e-05	0.00174502	66.1654	48.5549
rpl36	seurat_clusters6	2.12465	0.704383	28374.5	0.616596	1.66575e-05	0.00179354	62.782	47.9769
rps16	seurat_clusters6	1.90469	0.678369	28281.5	0.614575	1.78934e-05	0.00190596	59.7744	42.1965
rpl29	seurat_clusters6	1.90545	0.670051	28282	0.614586	1.78607e-05	0.00190596	58.2707	44.5087
rps26	seurat_clusters6	1.61152	0.620752	28158	0.611891	1.80135e-05	0.00191193	53.3835	38.1503
rps2	seurat_clusters6	2.28174	0.712116	28423	0.61765	1.80939e-05	0.00191366	68.0451	52.6012
rpl15	seurat_clusters6	1.65804	0.631027	28182.5	0.612423	1.86078e-05	0.00196105	55.2632	38.7283
rps18	seurat_clusters6	1.72545	0.601582	28230	0.613456	2.12439e-05	0.00217732	57.8947	44.5087
rpl12	seurat_clusters6	1.97924	0.681485	28208	0.612978	2.56384e-05	0.00256599	61.6541	42.7746
rps27.2	seurat_clusters6	1.3822	0.550209	28002.5	0.608512	2.58097e-05	0.0025745	53.0075	32.948
her4.1	seurat_clusters6	1.2202	0.571948	27679.5	0.601493	2.84339e-05	0.00279881	43.609	24.2775
gadd45ba	seurat_clusters6	1.57118	0.584638	28111.5	0.610881	2.85342e-05	0.00279945	57.8947	39.8844
tpt1	seurat_clusters6	1.72566	0.655159	27989.5	0.608229	3.62911e-05	0.00344708	54.5113	38.7283
rpl22	seurat_clusters6	1.6339	0.605111	27965.5	0.607708	3.73463e-05	0.00350268	54.1353	37.5723
rps7	seurat_clusters6	1.9864	0.692805	28064.5	0.609859	3.78582e-05	0.00353957	58.2707	43.3526
rpl19	seurat_clusters6	2.13522	0.642585	28159	0.611913	4.02746e-05	0.00370738	64.2857	51.4451
eef1b2	seurat_clusters6	1.32321	0.557933	27739	0.602786	4.18937e-05	0.00379781	47.3684	30.0578
rps13	seurat_clusters6	1.86142	0.628357	28017	0.608827	4.40719e-05	0.00393547	58.2707	42.7746
rpl28	seurat_clusters6	1.96243	0.672392	28021	0.608914	4.48044e-05	0.00397706	59.3985	42.1965
actb2	seurat_clusters6	2.09366	0.550251	28190.5	0.612597	4.55186e-05	0.00402846	70.3008	56.6474
rpl18a	seurat_clusters6	1.79997	0.630363	27938	0.60711	5.0318e-05	0.0043626	55.6391	41.6185
rpl17	seurat_clusters6	1.8696	0.61673	27957.5	0.607534	5.75469e-05	0.00487595	59.0226	43.9306
rpl21	seurat_clusters6	1.76602	0.621769	27846.5	0.605122	6.47741e-05	0.0053367	55.2632	39.8844
hspa8	seurat_clusters6	1.75254	0.542003	27874.5	0.60573	8.28592e-05	0.00646931	59.3985	46.8208
rps27.1	seurat_clusters6	1.99854	0.62123	27857	0.60535	9.34781e-05	0.00716706	61.6541	46.2428
cirbpb	seurat_clusters6	1.59093	0.536674	27803.5	0.604187	9.32779e-05	0.00716706	59.7744	41.0405
mt-co3	seurat_clusters6	1.83702	0.756434	27504	0.597679	9.8923e-05	0.00750733	48.1203	28.9017
rps3	seurat_clusters6	1.61623	0.563335	27727.5	0.602536	9.92167e-05	0.00751051	55.2632	40.4624
rpl38	seurat_clusters6	1.99579	0.61848	27818.5	0.604513	0.000102477	0.00769871	59.7744	47.3988
rpl13a	seurat_clusters6	1.76276	0.591357	27760	0.603242	0.000103491	0.00775531	58.6466	41.0405
mgat4b	seurat_clusters6	1.19213	0.525502	27371	0.594789	0.000104359	0.00780075	44.3609	25.4335
rps26l	seurat_clusters6	1.66815	0.572074	27708	0.602112	0.000109406	0.00811703	56.391	39.8844
rps19	seurat_clusters6	1.98726	0.658569	27722.5	0.602427	0.000117343	0.00859891	56.7669	43.9306
pnrc2	seurat_clusters6	1.78445	0.511144	27836.5	0.604905	0.000119853	0.00873987	65.4135	50.289
rpl3	seurat_clusters6	1.70611	0.557244	27699	0.601917	0.000128672	0.0092921	56.7669	44.5087
CR383676.1	seurat_clusters6	2.7677	1.1037	27375.5	0.594887	0.000131206	0.00945225	46.9925	26.5896

## Sheet: seurat_clusters7
feature	group	avgExpr	logFC	statistic	auc	pval	padj	pct_in	pct_out
zpld1a	seurat_clusters7	2.75676	2.69769	39850	0.865965	6.10708e-57	1.82144e-52	74.5665	1.8797
znf536	seurat_clusters7	3.01489	2.6299	40751	0.885545	2.01811e-51	3.00951e-47	84.3931	16.9173
slc4a4a	seurat_clusters7	1.76288	1.5856	36020	0.782737	2.27422e-35	1.69571e-31	62.4277	8.27068
otog	seurat_clusters7	3.12017	1.82431	38061.5	0.8271	4.01202e-32	1.58666e-28	87.8613	53.7594
ush2a	seurat_clusters7	1.562	1.42063	34743	0.754987	4.25592e-32	1.58666e-28	55.4913	6.01504
glis1b	seurat_clusters7	0.973596	0.962516	31805	0.691143	1.14893e-26	3.80744e-23	38.7283	0.75188
ncam2	seurat_clusters7	2.15636	1.72179	34602.5	0.751934	4.72351e-26	1.40879e-22	61.2717	16.5414
cxcl14	seurat_clusters7	1.51531	1.29551	33152	0.720414	1.95614e-23	4.86181e-20	51.4451	11.2782
sorcs2	seurat_clusters7	2.78688	1.58131	35393	0.769112	3.04357e-23	6.98264e-20	78.6127	43.2331
CU179643.1	seurat_clusters7	2.23937	1.52403	34416	0.747881	2.35936e-22	5.02627e-19	69.3642	25.9398
chrna7	seurat_clusters7	0.839747	0.785389	30823	0.669803	6.40231e-21	1.19343e-17	36.4162	3.00752
cntnap3	seurat_clusters7	1.89831	1.31303	33668	0.731627	1.76407e-20	3.09491e-17	64.7399	23.6842
slc1a2b	seurat_clusters7	1.08447	0.891757	32003	0.695445	9.18083e-20	1.52121e-16	47.3988	10.5263
zpld1b	seurat_clusters7	0.712255	0.698494	29552.5	0.642194	1.39504e-19	2.18984e-16	28.9017	0.37594
smad6b	seurat_clusters7	1.23637	0.968266	32334.5	0.702649	1.96364e-19	2.92828e-16	52.0231	13.1579
sorbs1	seurat_clusters7	1.48769	1.10464	32655.5	0.709624	3.98262e-19	5.39917e-16	55.4913	17.2932
slc4a2a	seurat_clusters7	1.4833	1.05458	32951.5	0.716057	4.34162e-19	5.62995e-16	60.1156	19.9248
ahcyl1	seurat_clusters7	1.23891	0.969464	32300	0.701899	5.13833e-19	6.38544e-16	51.4451	14.6617
cadm4	seurat_clusters7	3.15745	1.35755	34231.5	0.743872	2.73113e-18	3.13292e-15	87.8613	63.9098
epb41a	seurat_clusters7	0.838096	0.724417	30416.5	0.66097	2.4331e-17	2.68768e-14	37.5723	5.6391
wnk4b	seurat_clusters7	0.978307	0.849534	30344	0.659394	4.94169e-17	5.26378e-14	36.9942	6.01504
adamts18	seurat_clusters7	0.670217	0.639495	29078	0.631883	8.44021e-17	8.68032e-14	27.7457	1.50376
CR936442.1	seurat_clusters7	0.81559	0.764294	29384	0.638533	2.06017e-16	2.04815e-13	30.0578	3.00752
myo18aa	seurat_clusters7	1.08922	0.842335	30938	0.672302	5.38243e-16	5.17842e-13	44.5087	11.2782
samd10b	seurat_clusters7	0.994838	0.846741	30087	0.653809	8.02897e-16	7.48325e-13	36.4162	6.76692
NPAS3	seurat_clusters7	1.38291	0.992918	31408.5	0.682526	1.57383e-15	1.42241e-12	49.711	17.2932
sox6	seurat_clusters7	1.46143	0.975263	31737	0.689665	3.61093e-15	3.16753e-12	56.0694	21.8045
msx3	seurat_clusters7	0.603795	0.560803	28778	0.625364	4.2398e-15	3.61292e-12	27.1676	2.25564
fgf24	seurat_clusters7	0.690261	0.597428	29218.5	0.634936	1.01711e-14	8.42645e-12	31.2139	4.13534
dlg2	seurat_clusters7	2.01864	1.12019	31926	0.693772	5.3427e-14	4.30665e-11	62.4277	33.4586
tpst1	seurat_clusters7	0.981896	0.746929	30169.5	0.655602	9.43905e-14	7.21846e-11	41.0405	11.6541
meis1b	seurat_clusters7	1.36898	0.898603	30980.5	0.673226	1.72084e-13	1.2831e-10	52.6012	19.5489
kremen1	seurat_clusters7	2.77513	1.13751	32400.5	0.704083	1.94691e-13	1.41625e-10	83.815	57.5188
prom1b	seurat_clusters7	0.705247	0.59691	29118	0.632752	2.20659e-13	1.56694e-10	31.7919	6.01504
gdpd5a	seurat_clusters7	0.725304	0.603062	28960.5	0.62933	4.76023e-13	3.22668e-10	31.2139	5.6391
mtnr1aa	seurat_clusters7	0.59273	0.553688	27848	0.605155	5.11875e-13	3.39259e-10	22.5434	1.50376
si:ch73-60h1.1	seurat_clusters7	0.606959	0.542098	28389.5	0.616922	5.94017e-13	3.85142e-10	26.5896	3.38346
myo18ab	seurat_clusters7	1.24786	0.814651	30772.5	0.668706	7.14768e-13	4.53574e-10	50.8671	20.6767
slc25a22b	seurat_clusters7	2.03585	0.88608	31803.5	0.69111	2.28141e-12	1.37264e-09	71.6763	50.7519
plekha6	seurat_clusters7	1.37049	0.838561	30765	0.668543	2.71968e-12	1.59048e-09	54.3353	22.9323
tenm1	seurat_clusters7	0.708861	0.606596	28350	0.616063	2.81879e-12	1.61674e-09	27.1676	4.13534
unc5b	seurat_clusters7	0.671461	0.574315	28502	0.619366	2.89259e-12	1.62777e-09	28.3237	4.88722
cbln20	seurat_clusters7	0.696156	0.577813	28527.5	0.61992	3.22232e-12	1.77973e-09	28.9017	4.88722
prex2	seurat_clusters7	1.95189	1.00995	31405	0.68245	3.34584e-12	1.81436e-09	67.052	36.0902
cdon	seurat_clusters7	1.02592	0.716019	30015	0.652245	4.82779e-12	2.57123e-09	43.9306	15.7895
prom1a	seurat_clusters7	1.99794	0.94317	31273	0.679582	1.91315e-11	9.50995e-09	71.0983	41.7293
gpc5a	seurat_clusters7	0.827015	0.607645	28956	0.629232	5.85843e-11	2.77345e-08	35.2601	10.1504
ak5	seurat_clusters7	0.694839	0.556189	28068.5	0.609946	2.89926e-10	1.27163e-07	27.7457	6.39098
ctbp2a	seurat_clusters7	0.971867	0.651518	29308	0.636881	3.17437e-10	1.37211e-07	41.6185	15.7895
cahz	seurat_clusters7	0.801532	0.601628	28573	0.620909	4.39156e-10	1.81914e-07	32.948	10.1504
sema3fa	seurat_clusters7	1.06548	0.680495	29440.5	0.639761	5.05451e-10	2.06508e-07	43.9306	18.4211
micu3a	seurat_clusters7	0.902602	0.605308	28876.5	0.627504	7.79352e-10	3.1411e-07	38.1503	12.782
srgap3	seurat_clusters7	1.56289	0.767631	30291	0.658242	8.45619e-10	3.3185e-07	61.2717	34.5865
ptprub	seurat_clusters7	1.4506	0.790013	29777	0.647073	1.4113e-09	5.39643e-07	53.7572	24.812
erbb4b	seurat_clusters7	1.09662	0.704304	29087	0.632079	1.44544e-09	5.4567e-07	41.0405	16.5414
slc4a4b	seurat_clusters7	0.780342	0.549863	28320	0.615411	2.58967e-09	9.19486e-07	32.948	10.1504
coch	seurat_clusters7	1.16064	0.684791	29246	0.635534	2.95927e-09	1.02798e-06	45.0867	19.9248
chl1b	seurat_clusters7	1.34991	0.742711	29542.5	0.641977	3.61195e-09	1.22399e-06	52.0231	24.0602
rnf38	seurat_clusters7	0.700812	0.505082	28192	0.61263	3.69352e-09	1.22399e-06	31.7919	9.77444
kcnq5a	seurat_clusters7	4.14173	1.18601	30632	0.665653	3.67793e-09	1.22399e-06	89.0173	71.4286
nfasca	seurat_clusters7	1.68251	0.795868	30038.5	0.652755	4.60134e-09	1.50808e-06	63.0058	36.8421
tp53i11b	seurat_clusters7	0.797374	0.548862	28316	0.615324	5.1379e-09	1.64772e-06	33.526	11.2782
sema5ba	seurat_clusters7	1.71933	0.853215	29832.5	0.648279	5.43813e-09	1.72545e-06	58.3815	32.3308
nfixb	seurat_clusters7	1.62461	0.788965	29714.5	0.645715	9.0086e-09	2.76991e-06	56.0694	33.0827
CABZ01061591.1	seurat_clusters7	1.11774	0.637489	29048.5	0.631242	1.50503e-08	4.40075e-06	46.2428	21.4286
efna2a	seurat_clusters7	0.834997	0.562556	28203	0.612869	1.6642e-08	4.81892e-06	34.104	12.0301
slc12a2	seurat_clusters7	1.27581	0.672389	29290	0.63649	3.22403e-08	8.9034e-06	51.4451	29.6992
pcdh17	seurat_clusters7	1.24694	0.690518	28865	0.627255	5.78309e-08	1.49983e-05	46.2428	23.3083
syt7b	seurat_clusters7	1.10361	0.658293	28613	0.621778	6.56965e-08	1.6747e-05	42.1965	19.9248
adarb1b	seurat_clusters7	1.88789	0.912999	29227	0.635121	6.89067e-08	1.74165e-05	53.1792	31.9549
syne2b	seurat_clusters7	1.40605	0.678921	29210	0.634752	7.83067e-08	1.9626e-05	56.0694	30.4511
nxn	seurat_clusters7	0.734216	0.517858	27656.5	0.600993	1.06936e-07	2.62429e-05	30.0578	10.5263
hsp70.2	seurat_clusters7	1.39589	0.76682	28488	0.619062	1.38101e-07	3.29509e-05	43.3526	19.5489
sorbs2b	seurat_clusters7	1.2887	0.641993	28836.5	0.626635	2.39904e-07	5.50396e-05	50.8671	28.5714
raraa	seurat_clusters7	1.42376	0.665196	28985.5	0.629873	2.56069e-07	5.82996e-05	54.9133	32.3308
kcnma1a	seurat_clusters7	0.786166	0.501798	27623	0.600265	2.96117e-07	6.59082e-05	31.7919	11.6541
arhgap32a	seurat_clusters7	1.71155	0.689535	29260	0.635838	2.94543e-07	6.59082e-05	65.3179	41.3534
fgfrl1a	seurat_clusters7	1.60891	0.684995	29069.5	0.631698	4.34918e-07	9.13482e-05	57.8035	40.2256
limch1b	seurat_clusters7	1.89121	0.618223	29360.5	0.638022	5.11589e-07	0.000103096	73.4104	55.6391
mfng	seurat_clusters7	0.895937	0.525149	27973	0.607871	6.08343e-07	0.000120535	37.5723	17.6692
eya1	seurat_clusters7	2.31649	0.584431	29418	0.639272	6.2063e-07	0.000121778	79.1908	68.4211
march8	seurat_clusters7	0.88123	0.500972	27846.5	0.605122	9.91431e-07	0.000184066	37.5723	16.9173
adcy2b	seurat_clusters7	0.868022	0.503478	27772	0.603503	1.03987e-06	0.000185713	35.8382	16.5414
zgc:153704	seurat_clusters7	0.925489	0.566185	27459	0.596701	1.07508e-06	0.000190858	31.7919	12.782
ndrg3b	seurat_clusters7	1.2029	0.595907	28456.5	0.618378	1.20503e-06	0.000210176	47.9769	29.3233
spire1a	seurat_clusters7	1.10243	0.564713	28147	0.611652	1.64191e-06	0.000270552	43.3526	24.0602
nlgn1	seurat_clusters7	1.46765	0.648461	28254.5	0.613988	2.94284e-06	0.000443284	51.4451	27.0677
plch2a	seurat_clusters7	1.37957	0.586315	28338.5	0.615813	4.4639e-06	0.000633981	54.9133	32.7068
hsp70l	seurat_clusters7	1.67212	0.694809	28272	0.614368	5.3253e-06	0.000721942	54.3353	31.9549
arhgap21b	seurat_clusters7	1.13809	0.516875	27816	0.604459	1.25452e-05	0.00145475	45.6647	27.0677
msi1	seurat_clusters7	1.20352	0.538086	27994.5	0.608338	1.2633e-05	0.00145475	49.1329	32.3308
sipa1l3	seurat_clusters7	1.52945	0.557593	28210.5	0.613032	1.57605e-05	0.00171554	59.5376	40.6015
clstn1	seurat_clusters7	1.76204	0.513738	28361	0.616302	2.11909e-05	0.00217732	69.9422	54.5113
fgf10a	seurat_clusters7	1.31107	0.518679	27922.5	0.606773	2.46387e-05	0.00247424	52.6012	34.9624
akt3a	seurat_clusters7	1.06829	0.504037	27392	0.595245	3.65691e-05	0.00346245	41.0405	24.0602
fndc3ba	seurat_clusters7	1.5927	0.582946	27972.5	0.60786	3.71314e-05	0.00350153	59.5376	40.2256
caska	seurat_clusters7	1.32043	0.515474	27711.5	0.602188	4.64194e-05	0.00409603	52.6012	32.7068
klhl29	seurat_clusters7	1.04789	0.51732	27122	0.589378	4.72109e-05	0.00415358	36.4162	20.3008
ebf3a.1	seurat_clusters7	2.0923	0.706529	27786	0.603807	6.30615e-05	0.0052394	56.6474	39.4737
tnfrsf19	seurat_clusters7	1.19515	0.514366	27378	0.594941	7.43936e-05	0.00591677	45.0867	27.8195
