# Supplementary material for: Single-cell transcriptomic profiling of the zebrafish inner ear reveals molecularly distinct hair cell and supporting cell subtypes
Source: eLife. 2023 Jan 4;12:e82978. doi: 10.7554/eLife.82978 (PMC9851615; doi:10.7554/eLife.82978)
Supplement: Supplementary file 8. [file elife-82978-supp8.xlsx]

## Sheet: Macula cabp1b+ HC
feature	group	avgExpr	logFC	statistic	auc	pval	padj	pct_in	pct_out
TMC1	Macula cabp1b+ HC	2.9446	2.83222	265548	0.935934	7.7089e-124	5.74795e-120	89.6907	5.23077
atp2a3	Macula cabp1b+ HC	2.46177	2.28689	256682	0.904686	4.76958e-108	2.37088e-104	83.9633	10.7692
cabp1b	Macula cabp1b+ HC	2.70224	2.21594	254178	0.89586	4.4063e-101	1.8774e-97	89.8053	22.1538
plxna4	Macula cabp1b+ HC	2.51994	1.90375	249605	0.879743	1.06328e-92	2.64269e-89	89.2325	32
otofa	Macula cabp1b+ HC	3.02164	2.39583	248738	0.876685	3.9521e-92	9.06703e-89	85.7961	26.4615
znf536	Macula cabp1b+ HC	2.36843	1.8656	241158	0.849971	3.06963e-80	4.57758e-77	83.3906	25.8462
lrp2a	Macula cabp1b+ HC	1.95621	1.85593	236792	0.834585	1.84138e-79	2.61519e-76	69.7595	5.84615
zmat4a	Macula cabp1b+ HC	2.12311	1.75942	237991	0.838809	5.97956e-77	8.10638e-74	78.6942	17.5385
ncam1b	Macula cabp1b+ HC	2.59755	1.8358	239044	0.842518	4.44431e-76	5.52298e-73	86.0252	33.8462
myo15b	Macula cabp1b+ HC	1.47658	1.39292	233324	0.822358	1.05068e-74	1.11917e-71	67.9267	5.53846
pex5la	Macula cabp1b+ HC	2.62439	1.86951	234963	0.828136	2.20443e-70	2.12087e-67	83.7342	31.6923
inhbb	Macula cabp1b+ HC	1.31302	1.25972	226942	0.799868	1.34824e-67	1.11698e-64	61.9702	4.61538
rtn4r	Macula cabp1b+ HC	1.7256	1.58859	227720	0.802606	7.1241e-67	5.7426e-64	65.1775	7.38462
nrxn3a	Macula cabp1b+ HC	2.75124	1.4987	229956	0.810487	5.5389e-62	4.23584e-59	89.3471	54.1538
ush1c	Macula cabp1b+ HC	2.27224	1.64334	228609	0.805741	5.99128e-62	4.46725e-59	77.0905	37.8462
cnbd1	Macula cabp1b+ HC	1.49862	1.30345	224824	0.792401	1.03388e-61	7.52087e-59	66.323	10.4615
micu3a	Macula cabp1b+ HC	1.4811	1.29389	224530	0.791365	1.88744e-61	1.34031e-58	65.2921	12
atp1a1b	Macula cabp1b+ HC	1.47151	1.41225	219690	0.774304	2.16786e-59	1.50364e-56	57.0447	3.07692
capga	Macula cabp1b+ HC	1.17803	1.12486	218824	0.771256	2.37188e-58	1.53785e-55	56.5865	3.07692
si:ch73-138i16.1	Macula cabp1b+ HC	1.21682	1.15149	218740	0.77096	1.18185e-57	7.19363e-55	57.2738	4.30769
cadpsa	Macula cabp1b+ HC	1.22473	1.17914	216258	0.762208	5.50149e-56	3.28164e-53	54.4101	1.84615
sox13	Macula cabp1b+ HC	1.22658	1.12839	215925	0.761036	2.79269e-53	1.57155e-50	56.701	8
prickle2b	Macula cabp1b+ HC	2.35899	1.50567	221740	0.781531	2.72322e-52	1.47673e-49	81.9015	36.6154
osbpl2b	Macula cabp1b+ HC	1.47399	1.16798	218597	0.770454	4.04755e-52	2.11786e-49	66.5521	18.7692
KLHL29	Macula cabp1b+ HC	1.49836	1.28462	216499	0.763059	4.21207e-52	2.16595e-49	60.0229	12.3077
strc	Macula cabp1b+ HC	2.65242	1.29191	221296	0.779965	8.06668e-51	3.94408e-48	84.4215	62.4615
sema6e	Macula cabp1b+ HC	1.57236	1.28065	216144	0.76181	2.44817e-50	1.17769e-47	63.2302	14.1538
fam149a	Macula cabp1b+ HC	1.713	1.18166	217863	0.767867	8.42696e-49	3.86668e-46	72.5086	33.8462
shisa2a	Macula cabp1b+ HC	1.01769	0.975692	209484	0.738335	8.94777e-49	4.04344e-46	49.7136	2.46154
pax2a	Macula cabp1b+ HC	2.18498	1.24522	219097	0.772216	1.457e-48	6.39046e-46	84.0779	44.6154
cntn3b	Macula cabp1b+ HC	1.03344	1.02119	207226	0.730376	9.89205e-48	4.15536e-45	46.6208	0.923077
myo3b	Macula cabp1b+ HC	2.58155	1.21	218285	0.769354	4.16184e-47	1.67739e-44	87.7434	57.5385
aplp1	Macula cabp1b+ HC	1.75235	1.16083	216537	0.763193	6.11841e-47	2.43309e-44	75.1432	31.0769
atp8b5a	Macula cabp1b+ HC	0.960581	0.943167	205171	0.723133	1.47363e-45	5.63474e-43	45.4754	0.923077
brinp1	Macula cabp1b+ HC	1.02632	0.958076	205454	0.724133	4.38279e-44	1.63396e-41	47.7663	3.69231
sema6dl	Macula cabp1b+ HC	0.997026	0.920463	205976	0.725969	5.0489e-44	1.85906e-41	48.7973	4.92308
prkd2	Macula cabp1b+ HC	1.43231	1.03959	211130	0.744136	1.47771e-42	5.24674e-40	64.8339	26.4615
fgf22	Macula cabp1b+ HC	0.960278	0.913314	201836	0.711381	3.442e-41	1.17997e-38	44.559	2.76923
tbkbp1	Macula cabp1b+ HC	0.81952	0.813045	199352	0.702624	1.63644e-40	5.54624e-38	40.8935	0.615385
cib3	Macula cabp1b+ HC	0.788413	0.771513	199592	0.70347	2.88831e-40	9.67907e-38	41.5808	1.23077
grid1a	Macula cabp1b+ HC	1.24461	0.995647	205209	0.723267	3.11417e-39	1.00957e-36	55.6701	12.6154
si:ch211-263k4.2	Macula cabp1b+ HC	1.52353	1.12463	206974	0.729486	4.14506e-39	1.32932e-36	61.7411	17.8462
dachb	Macula cabp1b+ HC	1.53438	1.03014	208658	0.735422	4.56537e-39	1.44853e-36	67.9267	27.6923
cdh4	Macula cabp1b+ HC	1.32421	1.12189	202778	0.714697	2.51072e-38	7.64104e-36	50.8591	9.84615
ptprnb	Macula cabp1b+ HC	0.910314	0.813267	200692	0.707347	2.73414e-38	8.23694e-36	46.3918	5.53846
si:dkey-280e21.3	Macula cabp1b+ HC	1.29537	0.965283	205465	0.72417	7.01576e-38	2.09245e-35	58.8774	20
CR847968.1	Macula cabp1b+ HC	1.15599	0.989363	201810	0.711289	8.98584e-38	2.65349e-35	49.5991	8.92308
cacnb3b	Macula cabp1b+ HC	1.73799	1.06136	208250	0.733984	1.48226e-37	4.33415e-35	73.3104	33.8462
CU571064.1	Macula cabp1b+ HC	0.91203	0.817441	199730	0.703956	1.82042e-37	5.27125e-35	45.4754	5.84615
svila	Macula cabp1b+ HC	1.7254	0.996377	208458	0.73472	2.06389e-37	5.91881e-35	75.0286	38.4615
frya	Macula cabp1b+ HC	2.10745	1.02723	209090	0.736944	3.28332e-37	9.32619e-35	79.7251	56.6154
si:dkey-26i13.8	Macula cabp1b+ HC	1.15116	0.895807	203168	0.716072	8.04532e-37	2.26369e-34	54.6392	15.6923
skor2	Macula cabp1b+ HC	0.824386	0.781103	196670	0.693173	1.18205e-36	3.26432e-34	40.7789	2.46154
triob	Macula cabp1b+ HC	1.69857	1.05515	206904	0.72924	1.74285e-36	4.76884e-34	71.4777	30.4615
ptprga	Macula cabp1b+ HC	2.02923	1.16392	206800	0.728877	1.03585e-35	2.78328e-33	75.0286	36.9231
mybpc2a	Macula cabp1b+ HC	0.899778	0.867075	194639	0.686013	3.05914e-35	8.00342e-33	38.8316	2.15385
baiap2l2a	Macula cabp1b+ HC	0.99305	0.795586	200660	0.707234	3.24599e-35	8.4184e-33	51.4318	13.2308
palld	Macula cabp1b+ HC	1.7853	1.03987	206068	0.726293	4.17658e-35	1.07385e-32	73.3104	37.2308
atp8a2	Macula cabp1b+ HC	2.33424	1.11426	207098	0.729925	5.51562e-35	1.3941e-32	83.9633	53.8462
mb	Macula cabp1b+ HC	1.31851	0.912242	202146	0.71247	1.00913e-33	2.4272e-31	60.3666	22.1538
otomp	Macula cabp1b+ HC	1.08579	0.897231	198106	0.698234	1.08264e-33	2.58318e-31	48.3391	10.4615
foxo1a	Macula cabp1b+ HC	1.02384	0.817678	197876	0.69742	8.86189e-33	2.06489e-30	49.7136	12
slc2a3a	Macula cabp1b+ HC	0.985769	0.774601	198328	0.699015	9.56734e-33	2.19497e-30	50.4009	14.7692
sox1a	Macula cabp1b+ HC	0.780645	0.690778	194242	0.684614	2.02754e-32	4.61613e-30	41.6953	6.76923
scdb	Macula cabp1b+ HC	0.74911	0.700228	192203	0.677427	2.82006e-32	6.37184e-30	38.1443	3.69231
syt11a	Macula cabp1b+ HC	0.817648	0.716247	194224	0.68455	3.81029e-32	8.54449e-30	42.3826	6.46154
kcnh3	Macula cabp1b+ HC	1.04135	0.847879	196230	0.69162	4.2401e-32	9.43739e-30	47.1936	9.53846
TENM2	Macula cabp1b+ HC	2.86336	1.43517	203734	0.718069	4.33928e-32	9.5866e-30	79.0378	43.3846
frmpd3	Macula cabp1b+ HC	0.796561	0.732016	192194	0.677395	5.02539e-32	1.10207e-29	38.7171	3.38462
slc4a8	Macula cabp1b+ HC	0.76728	0.698099	192655	0.67902	6.08622e-32	1.32497e-29	39.5189	4.61538
gltpa	Macula cabp1b+ HC	0.83309	0.72749	193653	0.682538	1.39191e-31	2.96526e-29	42.0389	6.76923
BX942846.1	Macula cabp1b+ HC	0.831989	0.792774	190360	0.670931	1.53195e-31	3.24044e-29	35.9679	2.15385
rbm24a	Macula cabp1b+ HC	3.05633	0.763219	203821	0.718375	2.54769e-31	5.34845e-29	93.8144	83.0769
ndrg3b	Macula cabp1b+ HC	2.37331	0.872686	203620	0.717667	2.75085e-31	5.65822e-29	86.9416	67.6923
cdc14ab	Macula cabp1b+ HC	1.83401	0.892022	202721	0.714498	3.946e-31	8.00609e-29	75.6014	51.3846
tagapa	Macula cabp1b+ HC	1.10955	0.817944	197982	0.697797	6.14063e-31	1.22916e-28	53.4937	20.9231
dscamb	Macula cabp1b+ HC	0.997581	0.800798	195166	0.687869	1.08645e-30	2.11787e-28	47.3081	11.0769
thsd7aa	Macula cabp1b+ HC	0.767425	0.675515	191412	0.674641	2.87697e-30	5.53584e-28	39.6334	5.53846
ptprz1a	Macula cabp1b+ HC	0.849162	0.714592	192772	0.679433	3.35173e-30	6.40803e-28	42.6117	7.69231
si:dkey-57n24.6	Macula cabp1b+ HC	0.777471	0.711964	189948	0.669477	4.13981e-30	7.86432e-28	37.1134	3.69231
CR383676.2	Macula cabp1b+ HC	5.23268	1.04838	202482	0.713656	4.6322e-30	8.69854e-28	92.5544	82.7692
marc1	Macula cabp1b+ HC	0.741158	0.660862	190426	0.671164	1.03242e-29	1.92449e-27	38.488	5.23077
CR356242.1	Macula cabp1b+ HC	0.857416	0.750082	191060	0.6734	1.04069e-29	1.92786e-27	39.748	6.15385
ctnnd2a	Macula cabp1b+ HC	1.53968	0.932128	199266	0.702319	1.87661e-29	3.41281e-27	65.9794	29.5385
tns2a	Macula cabp1b+ HC	1.00275	0.77682	194242	0.684614	1.91595e-29	3.46323e-27	47.4227	12.9231
dacha	Macula cabp1b+ HC	1.42298	0.932511	197736	0.696927	3.79654e-29	6.74e-27	59.7938	24.6154
jag2b	Macula cabp1b+ HC	2.00828	0.966646	200644	0.707176	4.9586e-29	8.7509e-27	78.236	50.1538
rassf2a	Macula cabp1b+ HC	0.686741	0.631181	188486	0.664328	5.60101e-29	9.71222e-27	35.9679	3.69231
adgrb1a	Macula cabp1b+ HC	0.684484	0.651862	186776	0.658301	1.24015e-28	2.12572e-26	33.4479	2.15385
xylt1	Macula cabp1b+ HC	1.59694	0.912183	198618	0.700039	1.34919e-28	2.2994e-26	66.0939	34.4615
sh2d4bb	Macula cabp1b+ HC	0.890549	0.723869	191396	0.674581	2.42646e-28	4.08865e-26	43.0699	8.92308
CT030129.1	Macula cabp1b+ HC	0.934135	0.77196	191212	0.673934	3.1622e-28	5.29846e-26	42.6117	9.53846
nrcama	Macula cabp1b+ HC	0.773283	0.647273	190390	0.671035	3.75876e-28	6.26285e-26	41.008	8
dachc	Macula cabp1b+ HC	1.29151	0.823073	196621	0.692999	5.256e-28	8.66079e-26	59.5647	26.1538
mtmr8	Macula cabp1b+ HC	0.723815	0.634911	188926	0.665879	5.88634e-28	9.59344e-26	38.1443	6.46154
fhod1	Macula cabp1b+ HC	1.07174	0.76003	194559	0.685731	9.04296e-28	1.45003e-25	52.3482	20.3077
cntfr	Macula cabp1b+ HC	1.06854	0.790834	192830	0.679635	9.74057e-28	1.55354e-25	48.3391	12.6154
cntnap3	Macula cabp1b+ HC	0.709183	0.629883	187656	0.661401	9.83734e-28	1.56063e-25	36.3116	4.30769
fam102ba	Macula cabp1b+ HC	0.723243	0.640431	187538	0.660983	2.81972e-27	4.40304e-25	36.6552	5.23077
glra3	Macula cabp1b+ HC	0.706128	0.645359	186138	0.656049	3.41528e-27	5.25056e-25	34.2497	3.38462
cyp4t8	Macula cabp1b+ HC	0.5583	0.547236	183700	0.647458	5.55549e-27	8.49706e-25	30.3551	1.23077
sema3ga	Macula cabp1b+ HC	0.588061	0.560421	184452	0.650108	1.17891e-26	1.74064e-24	31.9588	2.46154
dlg2	Macula cabp1b+ HC	1.18012	0.811906	192570	0.678719	3.56667e-26	5.18908e-24	51.6609	17.8462
tox3	Macula cabp1b+ HC	0.917337	0.68698	190838	0.672614	4.19474e-26	6.07321e-24	46.2772	14.4615
BX294434.1	Macula cabp1b+ HC	1.04781	0.721912	192726	0.67927	4.68755e-26	6.75392e-24	51.5464	21.5385
sesn1	Macula cabp1b+ HC	1.27844	0.762548	194612	0.685916	7.92116e-26	1.12499e-23	60.3666	29.2308
plch2a	Macula cabp1b+ HC	1.00071	0.761268	189533	0.668017	1.40042e-25	1.9795e-23	44.559	11.6923
mpp7a	Macula cabp1b+ HC	0.929753	0.682945	190324	0.670804	1.45815e-25	2.04176e-23	46.6208	13.8462
tmc5	Macula cabp1b+ HC	1.5016	0.815495	195416	0.688751	2.03912e-25	2.84191e-23	66.8958	38.4615
skilb	Macula cabp1b+ HC	0.899698	0.712452	188658	0.664934	2.12344e-25	2.94566e-23	42.3826	11.3846
slc1a3a	Macula cabp1b+ HC	0.760991	0.635684	186152	0.6561	6.69145e-25	9.03043e-23	37.8007	7.69231
dab1a	Macula cabp1b+ HC	0.675228	0.58941	183894	0.648142	1.64667e-24	2.21225e-22	34.0206	4.92308
appa	Macula cabp1b+ HC	1.28386	0.708222	193334	0.681412	2.49664e-24	3.32421e-22	60.4811	36.3077
slc12a2	Macula cabp1b+ HC	1.57186	0.787317	194252	0.684647	3.89165e-24	5.1586e-22	67.9267	44
fosb	Macula cabp1b+ HC	2.08642	1	194423	0.685252	4.82601e-24	6.36883e-22	71.5922	43.0769
anxa6	Macula cabp1b+ HC	0.618183	0.558446	182348	0.642695	7.60638e-24	9.99385e-22	32.0733	4.30769
ckbb	Macula cabp1b+ HC	2.65043	0.958794	195124	0.687722	8.9106e-24	1.16052e-21	84.6506	62.1538
stat3	Macula cabp1b+ HC	1.72463	0.852649	193586	0.6823	1.59158e-23	2.04608e-21	70.1031	39.6923
enox1	Macula cabp1b+ HC	0.625972	0.560274	181408	0.63938	2.56323e-23	3.25312e-21	31.2715	3.69231
pde1a	Macula cabp1b+ HC	1.07863	0.738072	188388	0.663981	5.62496e-23	7.01943e-21	47.8809	18.7692
fgf10a	Macula cabp1b+ HC	0.884693	0.660118	186715	0.658084	8.41602e-23	1.03722e-20	43.5281	14.7692
cacna1ia	Macula cabp1b+ HC	1.12353	0.729616	188708	0.665109	1.04392e-22	1.26565e-20	50.63	18.7692
zgc:77784	Macula cabp1b+ HC	0.622876	0.543493	181292	0.638971	1.92923e-22	2.2833e-20	32.1879	5.53846
fthl27	Macula cabp1b+ HC	1.36553	0.778644	190120	0.670084	3.24215e-22	3.73348e-20	57.5029	29.5385
zgc:162989	Macula cabp1b+ HC	1.12641	0.687122	189310	0.667231	4.84089e-22	5.51067e-20	53.4937	30.1538
adgrg6	Macula cabp1b+ HC	0.811979	0.621369	184214	0.64927	4.88253e-22	5.53693e-20	39.5189	10.1538
wdr95	Macula cabp1b+ HC	1.32986	0.694224	190754	0.672318	6.87266e-22	7.73498e-20	61.8557	38.4615
ngfa	Macula cabp1b+ HC	0.63451	0.539523	180758	0.63709	9.82942e-22	1.10211e-19	32.5315	5.53846
si:ch211-207i1.2	Macula cabp1b+ HC	0.922965	0.629094	186692	0.658003	1.11087e-21	1.23626e-19	46.7354	18.7692
itpr1b	Macula cabp1b+ HC	1.30295	0.728347	189141	0.666635	2.40338e-21	2.64505e-19	57.2738	31.0769
robo1	Macula cabp1b+ HC	0.909689	0.65448	184252	0.649402	3.68583e-21	4.01204e-19	41.8099	12.6154
clic5a	Macula cabp1b+ HC	1.08647	0.666482	187622	0.661281	5.42663e-21	5.8641e-19	51.89	27.3846
gpr158a	Macula cabp1b+ HC	0.63223	0.531198	180096	0.634757	5.82565e-21	6.25e-19	32.5315	6.15385
rsrp1	Macula cabp1b+ HC	2.51054	0.695429	190672	0.672029	4.1239e-20	4.28555e-18	87.9725	74.4615
kcnma1a	Macula cabp1b+ HC	2.54752	0.924113	190252	0.670552	7.468e-20	7.65406e-18	88.0871	61.2308
pax2b	Macula cabp1b+ HC	0.775293	0.575356	181496	0.63969	1.69597e-19	1.70886e-17	38.7171	12.3077
btg2	Macula cabp1b+ HC	1.03976	0.64525	185036	0.652167	1.72579e-19	1.73305e-17	49.4845	22.4615
acsl4b	Macula cabp1b+ HC	0.602914	0.511966	178594	0.629462	2.00055e-19	2.00223e-17	31.9588	8
hsp70.2	Macula cabp1b+ HC	2.4314	1.11589	188306	0.66369	3.64985e-19	3.60453e-17	71.9359	40
hpca	Macula cabp1b+ HC	1.10747	0.649371	185736	0.654632	3.66264e-19	3.60522e-17	53.4937	28.3077
gramd4b	Macula cabp1b+ HC	0.908658	0.583476	183704	0.647472	4.32116e-19	4.22553e-17	46.2772	20
ppp1r15a	Macula cabp1b+ HC	1.17587	0.653453	185752	0.65469	5.28449e-19	5.1172e-17	54.9828	28
ano2b	Macula cabp1b+ HC	1.30685	0.695163	185792	0.654833	9.61423e-19	9.22008e-17	56.9301	29.5385
aplp2	Macula cabp1b+ HC	0.864391	0.562844	182770	0.644182	1.44762e-18	1.36631e-16	44.6735	20.6154
dlg1	Macula cabp1b+ HC	2.38515	0.73248	188452	0.664205	1.52625e-18	1.43597e-16	83.047	70.1538
hsd3b7	Macula cabp1b+ HC	1.33734	0.625279	186730	0.658139	1.59296e-18	1.49402e-16	62.6575	41.8462
uhrf1bp1l	Macula cabp1b+ HC	1.03112	0.590975	184788	0.651293	1.64037e-18	1.53367e-16	52.3482	29.2308
cyp4v7	Macula cabp1b+ HC	0.925657	0.593806	182739	0.644071	3.12162e-18	2.8559e-16	46.0481	21.5385
CU469539.1	Macula cabp1b+ HC	0.791256	0.55309	179732	0.633473	6.16959e-18	5.52576e-16	38.488	12.9231
znf385a	Macula cabp1b+ HC	1.60023	0.712591	186292	0.656594	7.29381e-18	6.47434e-16	67.4685	42.4615
si:ch211-216b21.2	Macula cabp1b+ HC	0.972305	0.659368	180342	0.635623	1.22261e-17	1.06933e-15	40.8935	16
baiap2l2b	Macula cabp1b+ HC	1.52562	0.58931	186157	0.656118	1.65827e-17	1.43356e-15	68.614	52.6154
cyth1a.1	Macula cabp1b+ HC	0.928644	0.570259	181414	0.639399	1.86423e-17	1.59772e-15	45.1317	19.3846
hsp70l	Macula cabp1b+ HC	2.81339	1.06169	186484	0.65727	2.72567e-17	2.30292e-15	80.756	54.7692
slc17a8	Macula cabp1b+ HC	2.32289	0.746251	186321	0.656696	4.80216e-17	3.96743e-15	83.2761	65.8462
SBNO2	Macula cabp1b+ HC	0.98449	0.590813	181218	0.63871	6.62055e-17	5.42467e-15	46.5063	22.1538
ptprub	Macula cabp1b+ HC	1.03061	0.646178	180305	0.635492	8.24677e-17	6.6837e-15	43.9863	18.7692
stard15	Macula cabp1b+ HC	1.55445	0.682474	184332	0.649685	1.04984e-16	8.43973e-15	64.3757	39.3846
stxbp5l	Macula cabp1b+ HC	0.739009	0.506965	177514	0.625657	2.06377e-16	1.62406e-14	36.8843	13.2308
kcnab2a	Macula cabp1b+ HC	2.37282	0.768889	185240	0.652884	2.65009e-16	2.07997e-14	84.8797	60.9231
igsf21a	Macula cabp1b+ HC	1.87787	0.718751	184639	0.650767	3.0926e-16	2.38956e-14	74.685	49.8462
tanc2a	Macula cabp1b+ HC	1.84943	0.652092	184784	0.651279	3.51636e-16	2.69602e-14	77.0905	57.2308
galnt9	Macula cabp1b+ HC	1.21964	0.632813	181603	0.640067	5.02803e-16	3.8158e-14	54.2955	25.5385
calm1b	Macula cabp1b+ HC	2.11422	0.637069	184596	0.650614	5.92213e-16	4.47158e-14	78.9233	63.6923
fosab	Macula cabp1b+ HC	2.88946	0.890601	184663	0.650852	7.30694e-16	5.47561e-14	86.9416	65.8462
gstp1	Macula cabp1b+ HC	1.15323	0.638566	180882	0.637526	8.60706e-16	6.38571e-14	50.7446	28
cox4i1l	Macula cabp1b+ HC	0.948729	0.574391	179601	0.633011	1.02056e-15	7.53422e-14	45.5899	23.6923
ddx5	Macula cabp1b+ HC	1.79742	0.537581	183812	0.647853	1.54064e-15	1.12621e-13	74.9141	61.5385
ano8a	Macula cabp1b+ HC	0.764992	0.509169	177336	0.62503	1.6749e-15	1.21839e-13	38.9462	17.2308
ccnl1a	Macula cabp1b+ HC	1.11761	0.590097	180976	0.637855	1.86984e-15	1.35359e-13	52.6919	32.9231
hcn1	Macula cabp1b+ HC	2.16344	0.753379	183724	0.647544	2.20465e-15	1.58443e-13	80.8706	56.9231
galnt2	Macula cabp1b+ HC	0.839694	0.518892	177726	0.626401	2.34117e-15	1.67849e-13	41.2371	17.5385
mctp1a	Macula cabp1b+ HC	1.92755	0.622945	183646	0.647269	2.42989e-15	1.73793e-13	78.4651	62.1538
srrm4	Macula cabp1b+ HC	1.08737	0.575309	179714	0.633411	3.59224e-15	2.52686e-13	50.1718	24.3077
cox8b	Macula cabp1b+ HC	1.41819	0.602797	182130	0.641923	3.64126e-15	2.55531e-13	63.2302	42.7692
zgc:153867	Macula cabp1b+ HC	0.876321	0.527524	177804	0.626675	4.76986e-15	3.30839e-13	42.0389	21.2308
spock3	Macula cabp1b+ HC	1.13528	0.558334	180618	0.636594	5.86474e-15	4.02106e-13	54.4101	35.3846
pcdh15b	Macula cabp1b+ HC	1.769	0.654089	182327	0.642619	7.75506e-15	5.2567e-13	70.3322	49.8462
fabp3	Macula cabp1b+ HC	0.915731	0.524528	178560	0.629342	7.75124e-15	5.2567e-13	45.7045	25.5385
sema7a	Macula cabp1b+ HC	0.948549	0.510365	179164	0.631469	8.38815e-15	5.67294e-13	48.6827	27.6923
iqsec1b	Macula cabp1b+ HC	2.76924	0.625642	182973	0.644896	1.10837e-14	7.34604e-13	92.4399	80
prkg1a	Macula cabp1b+ HC	0.909374	0.502577	176708	0.622813	6.86994e-14	4.3136e-12	44.559	20.9231
casz1	Macula cabp1b+ HC	1.10908	0.535037	178753	0.630022	7.43806e-14	4.64101e-12	53.9519	31.3846
epha7	Macula cabp1b+ HC	1.35884	0.605396	179344	0.632105	1.07442e-13	6.57998e-12	59.1065	37.2308
hsp70.1	Macula cabp1b+ HC	2.06457	0.746451	180516	0.636234	1.42144e-13	8.61674e-12	73.425	49.5385
celsr1a	Macula cabp1b+ HC	1.56532	0.560021	180393	0.635802	1.46106e-13	8.83899e-12	70.3322	52.3077
dock3	Macula cabp1b+ HC	0.936226	0.510679	175810	0.619648	3.03747e-13	1.79747e-11	43.8717	23.0769
dachd	Macula cabp1b+ HC	1.07005	0.532528	176462	0.621949	7.06098e-13	4.04988e-11	49.5991	27.0769
gapdhs	Macula cabp1b+ HC	2.62118	0.578983	179998	0.634408	7.09874e-13	4.06372e-11	87.1707	74.7692
ush2a	Macula cabp1b+ HC	2.20796	0.726133	179532	0.632769	8.10053e-13	4.61065e-11	77.205	55.6923
sorbs1	Macula cabp1b+ HC	1.70681	0.533404	179258	0.631802	8.75777e-13	4.94698e-11	70.6758	58.4615
rtn4rl2b	Macula cabp1b+ HC	1.17376	0.509924	177512	0.625646	9.16678e-13	5.13238e-11	54.9828	38.4615
agrn	Macula cabp1b+ HC	2.79615	0.566578	179868	0.633954	9.17203e-13	5.13238e-11	91.2944	84
hsp90aa1.2	Macula cabp1b+ HC	3.24547	0.85512	179742	0.633508	1.01627e-12	5.62343e-11	88.6598	72.3077
dnajb1b	Macula cabp1b+ HC	1.85051	0.673599	178745	0.629994	1.24513e-12	6.80148e-11	69.3013	48.3077
diaph2	Macula cabp1b+ HC	1.22731	0.529655	176752	0.622971	2.29372e-12	1.20866e-10	55.2119	34.7692
si:dkey-151g10.6	Macula cabp1b+ HC	1.32295	0.525187	174248	0.614142	1.23558e-10	5.51666e-09	58.4192	36.9231
agbl4.1	Macula cabp1b+ HC	1.48073	0.52472	174042	0.613418	2.66729e-10	1.13808e-08	61.3975	41.8462
jun	Macula cabp1b+ HC	2.06188	0.575952	174256	0.614174	6.99745e-10	2.81645e-08	75.0286	57.2308
nfixb	Macula cabp1b+ HC	2.22553	0.634441	172644	0.608492	4.57302e-09	1.68591e-07	75.6014	54.4615
si:dkey-205h13.1	Macula cabp1b+ HC	2.31233	0.545324	172450	0.607807	7.81984e-09	2.78313e-07	82.8179	68
jdp2b	Macula cabp1b+ HC	1.68646	0.555376	171294	0.603734	1.02154e-08	3.57599e-07	64.4903	44.6154

## Sheet: Macula cabp2b+ HC
feature	group	avgExpr	logFC	statistic	auc	pval	padj	pct_in	pct_out
cabp2b	Macula cabp2b+ HC	3.34324	3.1914	270242	0.95248	1.99725e-190	5.9568e-186	92	8.24742
s100s	Macula cabp2b+ HC	4.02985	3.55347	267566	0.943045	4.27126e-154	6.36952e-150	92.9231	21.9931
pcdh15a	Macula cabp2b+ HC	2.07832	1.91754	240282	0.846882	3.68279e-129	3.66131e-125	74.4615	7.10195
ndst3	Macula cabp2b+ HC	1.49306	1.45731	221882	0.782032	4.15506e-116	2.47849e-112	57.8462	1.94731
zgc:158263	Macula cabp2b+ HC	1.32527	1.22123	223595	0.788069	7.58956e-101	2.82948e-97	62.1538	6.52921
si:dkey-172j4.3	Macula cabp2b+ HC	1.31314	1.26573	214915	0.757476	2.90474e-100	9.62598e-97	53.5385	2.63459
si:dkeyp-72h1.1	Macula cabp2b+ HC	1.18767	1.17051	207476	0.731257	1.67613e-94	4.99907e-91	47.0769	1.26002
pvalb9	Macula cabp2b+ HC	3.64961	2.75006	244231	0.860802	2.70252e-93	7.32753e-90	85.8462	37.6861
pcdh7a	Macula cabp2b+ HC	1.58909	1.35691	224992	0.792991	1.51473e-87	3.22691e-84	68.3077	12.3711
atp6v1c2	Macula cabp2b+ HC	0.971314	0.906934	209835	0.739572	2.54881e-85	5.06788e-82	51.3846	4.00916
dok6	Macula cabp2b+ HC	1.21291	1.14186	207862	0.73262	7.16063e-83	1.33479e-79	49.5385	3.89462
znf385b	Macula cabp2b+ HC	1.42442	1.32111	209511	0.73843	2.51043e-81	4.40433e-78	51.6923	5.04009
loxhd1a	Macula cabp2b+ HC	1.64456	1.37577	222952	0.785805	3.06195e-81	5.07348e-78	68	13.9748
otofb	Macula cabp2b+ HC	3.48277	1.28499	243324	0.857607	3.90997e-81	6.13763e-78	96.9231	83.2761
anxa5a	Macula cabp2b+ HC	1.86043	1.54695	221816	0.781799	3.99394e-76	5.17909e-73	65.5385	17.1821
tmc2a	Macula cabp2b+ HC	2.31467	1.73271	228191	0.804268	1.62032e-75	1.93305e-72	76	25.7732
kcng4a	Macula cabp2b+ HC	0.719596	0.704183	195191	0.687958	2.52241e-75	2.89349e-72	38.4615	0.91638
etnppl	Macula cabp2b+ HC	0.650243	0.629395	196052	0.690991	2.7729e-75	3.06303e-72	39.3846	1.14548
myo1ha	Macula cabp2b+ HC	0.66159	0.653841	191438	0.674731	5.77594e-72	5.94026e-69	35.3846	0.45819
gal3st3	Macula cabp2b+ HC	2.46139	1.62378	231974	0.817603	9.66544e-72	9.60905e-69	84.9231	40.4353
kcnh7	Macula cabp2b+ HC	1.47624	1.28667	209798	0.739441	2.93578e-70	2.73624e-67	55.3846	9.04926
atp2b2	Macula cabp2b+ HC	0.902911	0.82111	202729	0.714526	1.29271e-69	1.16834e-66	47.3846	5.15464
ttc7a	Macula cabp2b+ HC	0.669646	0.623501	197369	0.695635	8.02086e-68	7.03595e-65	42.1538	3.20733
loxhd1b	Macula cabp2b+ HC	0.732423	0.716133	190450	0.671247	1.03579e-67	8.82644e-65	35.0769	0.91638
tmem240b	Macula cabp2b+ HC	0.67797	0.622838	195928	0.690556	8.45439e-64	6.63559e-61	41.5385	3.66552
adam11	Macula cabp2b+ HC	0.850383	0.778228	193227	0.681036	3.08316e-59	2.08989e-56	39.6923	3.78007
sall3a	Macula cabp2b+ HC	0.538353	0.522075	186127	0.656012	4.82938e-59	3.2008e-56	32.3077	1.26002
sall1a	Macula cabp2b+ HC	0.612429	0.590415	185918	0.655274	4.57424e-58	2.90269e-55	32.3077	1.37457
CR352265.3	Macula cabp2b+ HC	0.716239	0.623747	196248	0.691686	1.00084e-55	5.85297e-53	44.3077	6.41466
sema5ba	Macula cabp2b+ HC	1.24595	1.11155	194382	0.685109	8.11422e-54	4.65397e-51	42.1538	6.30011
creb5b	Macula cabp2b+ HC	0.842667	0.789014	185752	0.65469	1.25582e-52	6.9361e-50	33.2308	2.52005
cables1	Macula cabp2b+ HC	0.92383	0.806963	194156	0.684312	2.77629e-52	1.47862e-49	42.7692	6.64376
RASSF5	Macula cabp2b+ HC	0.98516	0.793863	200092	0.70523	1.63735e-51	8.13901e-49	50.7692	11.2257
odf3l2a	Macula cabp2b+ HC	0.668474	0.614794	186778	0.658308	3.77188e-50	1.78565e-47	34.7692	3.66552
GRIK2	Macula cabp2b+ HC	1.01082	0.866897	193407	0.681671	1.05329e-48	4.68871e-46	43.0769	7.78923
KCNB2	Macula cabp2b+ HC	0.966676	0.94035	179598	0.633002	1.51553e-48	6.55082e-46	27.6923	1.37457
xirp2a	Macula cabp2b+ HC	1.18843	0.88789	203724	0.718032	3.89383e-48	1.65905e-45	58.4615	17.4112
triobpa	Macula cabp2b+ HC	1.05635	0.787996	202094	0.71229	1.62799e-47	6.74371e-45	56.9231	15.8076
spata13	Macula cabp2b+ HC	0.653289	0.543174	192248	0.677586	3.74388e-47	1.52961e-44	42.7692	7.56014
twf2a	Macula cabp2b+ HC	0.971389	0.729685	200026	0.705	1.55773e-46	6.11308e-44	54.4615	14.3184
si:ch211-278j3.3	Macula cabp2b+ HC	0.598397	0.504641	187738	0.661692	2.48848e-45	9.39478e-43	38.1538	5.49828
enpp1	Macula cabp2b+ HC	0.687955	0.591874	182757	0.644134	2.11243e-39	7.00035e-37	33.8462	5.26919
pcdh1b	Macula cabp2b+ HC	1.02991	0.790783	190923	0.672916	2.6184e-39	8.58173e-37	45.2308	10.9966
cep126	Macula cabp2b+ HC	0.665693	0.535607	186395	0.656957	5.01309e-39	1.57385e-36	39.0769	7.56014
fhod3b	Macula cabp2b+ HC	1.39341	0.972531	197604	0.696461	1.31874e-38	4.09702e-36	56.6154	19.3585
abhd12	Macula cabp2b+ HC	2.20178	0.989144	207664	0.73192	8.45366e-37	2.35636e-34	82.1538	56.4719
eya4	Macula cabp2b+ HC	1.89245	0.968759	204350	0.72024	9.0842e-35	2.2578e-32	80.3077	45.9336
chrna9	Macula cabp2b+ HC	0.714732	0.550782	186478	0.657247	1.21526e-34	2.99547e-32	41.2308	10.5384
sort1b	Macula cabp2b+ HC	0.710826	0.532412	185740	0.654646	4.05942e-33	9.53324e-31	41.5385	10.882
nfyc	Macula cabp2b+ HC	0.954123	0.651091	191234	0.67401	9.17252e-33	2.1207e-30	51.3846	17.4112
ptprt	Macula cabp2b+ HC	1.00849	0.732572	186902	0.658742	1.34009e-30	2.59533e-28	44.3077	14.8912
fhdc1	Macula cabp2b+ HC	0.781737	0.558967	184710	0.651018	1.13951e-29	2.09789e-27	42.7692	12.8293
trim3b	Macula cabp2b+ HC	1.34358	0.74753	195174	0.6879	1.69749e-29	3.10598e-27	66.7692	30.5842
galnt11	Macula cabp2b+ HC	1.11015	0.683376	191540	0.675089	2.24498e-29	4.03353e-27	56.3077	23.1386
dscama	Macula cabp2b+ HC	0.733767	0.547423	181278	0.638921	3.42497e-29	6.11675e-27	37.5385	9.85109
rims2a	Macula cabp2b+ HC	1.05646	0.684412	189330	0.667303	5.4231e-29	9.45871e-27	52.3077	19.8167
id2a	Macula cabp2b+ HC	0.727322	0.565739	179982	0.634354	3.82466e-28	6.33725e-26	35.6923	9.73654
s100a1	Macula cabp2b+ HC	0.77229	0.594517	179444	0.632457	7.8454e-28	1.26481e-25	35.0769	9.50745
slc4a10a	Macula cabp2b+ HC	0.817871	0.564565	183547	0.646919	2.62447e-27	4.11973e-25	43.0769	13.9748
oaz2a	Macula cabp2b+ HC	1.23003	0.746247	190557	0.671626	3.00231e-27	4.63958e-25	56	26.1168
NC-002333.4	Macula cabp2b+ HC	2.67152	1.73935	186022	0.655644	6.06924e-27	9.18858e-25	45.5385	18.7858
peli1b	Macula cabp2b+ HC	0.841923	0.531742	186744	0.658188	7.25478e-27	1.0873e-24	50.4615	18.7858
ralgps2	Macula cabp2b+ HC	0.696415	0.513421	179393	0.632278	1.01662e-26	1.51604e-24	36.3077	10.1947
bdnf	Macula cabp2b+ HC	1.36778	0.718634	192342	0.677917	7.01462e-26	1.00101e-23	63.0769	35.1661
eya1	Macula cabp2b+ HC	2.69354	0.702029	197048	0.694503	2.92049e-25	4.03258e-23	92.6154	81.3288
adarb1b	Macula cabp2b+ HC	1.47583	0.827388	190642	0.671924	3.54439e-25	4.84915e-23	59.3846	32.417
C5H11orf1	Macula cabp2b+ HC	0.833797	0.547467	183894	0.64814	4.7286e-25	6.43975e-23	45.5385	17.7549
nat16	Macula cabp2b+ HC	1.27675	0.716184	189831	0.669067	5.10442e-25	6.91997e-23	60.6154	29.4387
NC-002333.17	Macula cabp2b+ HC	1.55006	1.09598	178102	0.627726	9.85358e-24	1.27775e-21	36.6154	11.7984
mt-nd5	Macula cabp2b+ HC	0.986764	0.72556	176703	0.622797	1.33803e-23	1.72757e-21	33.8462	10.6529
six1b	Macula cabp2b+ HC	1.11047	0.614616	186091	0.655885	6.79344e-23	8.44226e-21	56.3077	25.5441
mt-co1	Macula cabp2b+ HC	1.57727	1.06107	178438	0.628912	7.33595e-23	9.07862e-21	38.1538	13.173
strbp	Macula cabp2b+ HC	1.71769	0.758322	191002	0.673196	1.91971e-22	2.28109e-20	69.5385	46.9645
pou4f1	Macula cabp2b+ HC	0.855206	0.537965	182067	0.641702	2.25451e-22	2.64727e-20	45.8462	19.244
plxna1a	Macula cabp2b+ HC	1.02593	0.635058	182372	0.642776	2.29841e-22	2.68824e-20	46.4615	19.8167
tlr7.1	Macula cabp2b+ HC	0.896355	0.571936	180552	0.636363	6.4687e-22	7.30792e-20	43.0769	17.6403
sema4ba	Macula cabp2b+ HC	0.780056	0.502652	178532	0.629243	2.20459e-21	2.43525e-19	40.6154	15.1203
dpysl3	Macula cabp2b+ HC	0.858041	0.520139	181414	0.639399	3.17922e-21	3.47327e-19	47.0769	20.0458
unc5a	Macula cabp2b+ HC	1.61246	0.872597	186026	0.655656	4.34576e-21	4.71317e-19	55.6923	32.9897
ip6k2a	Macula cabp2b+ HC	1.23707	0.640231	186169	0.65616	1.05058e-20	1.11905e-18	59.6923	34.1352
cib2	Macula cabp2b+ HC	1.13888	0.564347	185434	0.653571	2.77171e-20	2.91078e-18	62.1538	32.0733
MAP3K13	Macula cabp2b+ HC	0.962898	0.548505	181592	0.64003	4.16835e-20	4.3167e-18	49.2308	23.1386
pclob	Macula cabp2b+ HC	2.54442	0.671661	190454	0.671264	5.12572e-20	5.28978e-18	88	77.4341
hipk3a	Macula cabp2b+ HC	1.07941	0.557255	183443	0.646552	1.69558e-19	1.70886e-17	56.9231	29.3242
cers1	Macula cabp2b+ HC	1.03931	0.539232	182098	0.641812	1.04667e-18	1.00054e-16	54.4615	28.5223
CR384075.1	Macula cabp2b+ HC	0.840639	0.509238	176818	0.6232	1.06298e-18	1.01289e-16	41.2308	16.953
kcnn2	Macula cabp2b+ HC	1.46284	0.673807	183667	0.647342	3.35788e-18	3.05332e-16	60.3077	36.5407
mt-nd4	Macula cabp2b+ HC	1.07822	0.730665	172456	0.607828	3.6842e-18	3.33985e-16	32.3077	11.9129
spsb4a	Macula cabp2b+ HC	1.83995	0.643644	185901	0.655215	1.88099e-17	1.60747e-15	78.7692	56.2428
mt-co2	Macula cabp2b+ HC	1.50513	0.963393	170996	0.602682	3.63441e-17	3.02783e-15	31.6923	11.1111
dpp6b	Macula cabp2b+ HC	0.941177	0.562241	174770	0.615986	1.03839e-16	8.37025e-15	40	17.5258
mt-atp6	Macula cabp2b+ HC	1.35182	0.908207	169784	0.59841	1.88695e-16	1.49487e-14	29.5385	10.882
mt-cyb	Macula cabp2b+ HC	1.32993	0.877249	169965	0.599048	1.88854e-16	1.49487e-14	30.1538	10.9966
mt-co3	Macula cabp2b+ HC	1.44514	0.913258	170136	0.599653	1.92376e-16	1.51789e-14	31.0769	10.9966
kcnd1	Macula cabp2b+ HC	0.705059	0.565006	166466	0.586714	2.80874e-16	2.19295e-14	24	7.56014
lyst	Macula cabp2b+ HC	1.13373	0.553549	179076	0.631159	6.91801e-16	5.19722e-14	54.1538	30.5842
far1	Macula cabp2b+ HC	1.03331	0.531065	177254	0.624739	3.05314e-15	2.15272e-13	49.8462	27.8351
mt-nd2	Macula cabp2b+ HC	0.876163	0.585821	166870	0.588142	2.38991e-14	1.54284e-12	27.0769	10.0802
osbpl3b	Macula cabp2b+ HC	1.39731	0.585597	178660	0.629696	4.60124e-14	2.93859e-12	61.2308	39.8625
arfgef1	Macula cabp2b+ HC	1.78075	0.567873	180388	0.635785	1.01058e-13	6.21455e-12	74.7692	57.5029
camk2g2	Macula cabp2b+ HC	1.44438	0.532258	178718	0.629899	1.81913e-13	1.08947e-11	64.9231	46.1627
pbx3b	Macula cabp2b+ HC	2.62888	0.542935	180562	0.636398	3.05753e-13	1.80576e-11	84.3077	80.2978
gal3st1a	Macula cabp2b+ HC	1.4147	0.512759	176758	0.622991	2.7196e-12	1.42053e-10	64.6154	45.2463
rxraa	Macula cabp2b+ HC	0.98346	0.507721	169842	0.598615	3.23788e-12	1.6824e-10	38.4615	19.244
mt-nd1	Macula cabp2b+ HC	0.956927	0.6105	165062	0.581768	4.23603e-12	2.17078e-10	26.7692	11.2257
cacna2d2a	Macula cabp2b+ HC	1.52949	0.509007	174354	0.614518	1.07466e-10	4.83894e-09	63.3846	48.5682
col18a1a	Macula cabp2b+ HC	1.83418	0.571756	174322	0.614407	2.77761e-10	1.18346e-08	72.6154	54.5246
pcdh7b	Macula cabp2b+ HC	1.42933	0.518936	171644	0.604968	6.71457e-10	2.71358e-08	57.8462	38.3734
CR383676.1	Macula cabp2b+ HC	1.45722	0.808402	162040	0.571116	6.86488e-10	2.76683e-08	25.8462	10.4238
