# Supplementary material for: Single-cell transcriptomic profiling of the zebrafish inner ear reveals molecularly distinct hair cell and supporting cell subtypes
Source: eLife. 2023 Jan 4;12:e82978. doi: 10.7554/eLife.82978 (PMC9851615; doi:10.7554/eLife.82978)
Supplement: Supplementary file 10. [file elife-82978-supp10.xlsx]

## Sheet: Crista cabp1b+ HC
feature	group	avgExpr	logFC	statistic	auc	pval	padj	pct_in	pct_out
TMC1	Crista cabp1b+ HC	3.13541	2.74132	26674.5	0.906926	1.42429e-43	2.12398e-39	87.7193	15.6977
zgc:56628	Crista cabp1b+ HC	1.96603	1.94617	24698	0.839725	1.43119e-37	1.42284e-33	68.4211	1.16279
tmc2b	Crista cabp1b+ HC	1.43482	1.31594	23229	0.78978	6.24875e-28	2.66242e-24	63.1579	5.81395
cabp1b	Crista cabp1b+ HC	1.5754	1.38907	23056.5	0.783915	5.19826e-26	1.93798e-22	64.3275	8.72093
frmpd3	Crista cabp1b+ HC	1.34291	1.16581	22485	0.764484	2.58353e-23	6.42115e-20	60.8187	9.30233
nfasca	Crista cabp1b+ HC	1.13067	1.02642	22075.5	0.750561	4.26132e-23	9.77645e-20	54.9708	5.23256
otofa	Crista cabp1b+ HC	2.99924	1.62044	23319.5	0.792857	1.91315e-21	3.35646e-18	88.3041	51.7442
slc17a8	Crista cabp1b+ HC	1.69975	1.24102	22368	0.760506	1.15302e-19	1.63757e-16	69.5906	23.2558
dacha	Crista cabp1b+ HC	1.8546	1.32134	22339	0.75952	5.43829e-19	7.3726e-16	71.345	27.907
celf4	Crista cabp1b+ HC	1.2457	1.12193	21058.5	0.715983	9.84112e-19	1.22296e-15	47.9532	6.39535
AL929216.1	Crista cabp1b+ HC	1.22516	1.03107	21279	0.72348	2.25243e-18	2.5838e-15	53.2164	8.72093
mctp1a	Crista cabp1b+ HC	2.29362	1.28203	22564.5	0.767187	3.01879e-18	3.33464e-15	81.8713	52.907
tenm3	Crista cabp1b+ HC	1.46567	1.09421	21549.5	0.732677	5.00376e-17	4.97457e-14	61.9883	19.186
sh2d4bb	Crista cabp1b+ HC	0.987815	0.80378	21040.5	0.715371	1.26226e-16	1.21442e-13	53.2164	12.2093
tox3	Crista cabp1b+ HC	1.0085	0.832084	20708	0.704066	7.57328e-16	7.05854e-13	49.7076	10.4651
znf536	Crista cabp1b+ HC	2.33338	1.15865	21968.5	0.746923	9.90281e-16	8.95004e-13	83.0409	55.2326
iqca1	Crista cabp1b+ HC	1.06932	0.921298	20531.5	0.698065	1.40015e-15	1.12864e-12	46.7836	9.88372
tmc5	Crista cabp1b+ HC	2.28689	1.0997	21906.5	0.744815	2.41474e-15	1.84666e-12	87.7193	58.7209
pex5la	Crista cabp1b+ HC	0.926367	0.834069	20039	0.681321	2.54612e-15	1.88054e-12	40.3509	5.23256
cib3	Crista cabp1b+ HC	0.798201	0.694756	20063.5	0.682154	8.14682e-15	5.65067e-12	42.1053	6.39535
ckbb	Crista cabp1b+ HC	2.31632	1.18667	21525	0.731844	2.59863e-14	1.58172e-11	75.4386	51.1628
gstp1	Crista cabp1b+ HC	1.91379	1.25255	21072	0.716442	8.38414e-14	4.80879e-11	64.9123	31.9767
sox13	Crista cabp1b+ HC	0.862189	0.697101	19962	0.678703	4.807e-13	2.51524e-10	45.0292	11.0465
prkd2	Crista cabp1b+ HC	0.978636	0.74365	20251	0.688528	5.01564e-13	2.57916e-10	49.7076	16.2791
bmp2a	Crista cabp1b+ HC	0.734329	0.629429	19452.5	0.66138	5.1336e-13	2.59508e-10	37.4269	5.23256
osbpl2b	Crista cabp1b+ HC	1.22456	0.794657	20642	0.701822	8.38368e-13	3.90693e-10	61.4035	25
fgfr3	Crista cabp1b+ HC	0.922537	0.717126	19624	0.667211	1.1187e-11	4.57056e-09	43.8596	11.6279
cdh4	Crista cabp1b+ HC	0.725483	0.646305	18673	0.634877	9.12009e-11	3.23817e-08	30.9942	4.65116
bcl2a	Crista cabp1b+ HC	1.21747	0.771914	19936	0.677819	1.04028e-10	3.65014e-08	56.1404	22.6744
cacnb3b	Crista cabp1b+ HC	1.17219	0.71333	19819	0.673841	4.01175e-10	1.30055e-07	57.3099	24.4186
ush1c	Crista cabp1b+ HC	1.61494	0.840141	20186.5	0.686336	4.37181e-10	1.38712e-07	69.0058	43.0233
si:dkey-57n24.6	Crista cabp1b+ HC	1.65195	0.791938	20223	0.687576	5.33823e-10	1.64137e-07	75.4386	44.7674
kcnab1a	Crista cabp1b+ HC	1.15735	0.748959	19469	0.661941	7.51815e-10	2.25253e-07	50.2924	17.4419
kcnd3	Crista cabp1b+ HC	1.287	0.92742	19180.5	0.652132	1.86389e-09	5.00816e-07	43.8596	16.2791
zmat4a	Crista cabp1b+ HC	1.82787	0.915266	19826	0.674079	4.36757e-09	1.11336e-06	66.0819	41.8605
kcnh3	Crista cabp1b+ HC	1.04667	0.724301	18915	0.643105	6.19837e-09	1.54055e-06	41.5205	13.9535
espnla	Crista cabp1b+ HC	0.880666	0.655803	18783.5	0.638634	6.28977e-09	1.55035e-06	38.5965	12.2093
tox	Crista cabp1b+ HC	0.74552	0.504196	18943	0.644057	7.15371e-09	1.73463e-06	42.6901	14.5349
fhod1	Crista cabp1b+ HC	1.39712	0.708376	19667.5	0.66869	8.16007e-09	1.94699e-06	64.3275	36.6279
srrm4	Crista cabp1b+ HC	0.688516	0.50954	18549	0.630661	1.19267e-08	2.71537e-06	35.6725	9.88372
zgc:162989	Crista cabp1b+ HC	1.27768	0.659347	19435	0.660785	2.58283e-08	5.42485e-06	58.4795	36.6279
AL845324.1	Crista cabp1b+ HC	0.603686	0.531018	17739	0.603121	4.36746e-08	8.5697e-06	23.9766	4.06977
sox1a	Crista cabp1b+ HC	0.830908	0.532364	18900.5	0.642612	5.48493e-08	1.04864e-05	45.614	21.5116
pax2a	Crista cabp1b+ HC	0.784507	0.518245	18661.5	0.634486	6.56331e-08	1.24682e-05	41.5205	15.6977
ngfa	Crista cabp1b+ HC	0.754437	0.500972	18593	0.632157	7.18047e-08	1.3469e-05	40.3509	14.5349
palld	Crista cabp1b+ HC	1.00674	0.637197	18820	0.639875	9.03074e-08	1.64233e-05	45.614	20.9302
rbm24a	Crista cabp1b+ HC	2.60856	0.585212	19605.5	0.666582	9.11424e-08	1.64747e-05	89.4737	81.3953
klhl30	Crista cabp1b+ HC	0.672446	0.51853	18144	0.616891	1.05689e-07	1.84338e-05	31.5789	9.30233
hcn5	Crista cabp1b+ HC	0.808554	0.575021	18267	0.621073	1.46359e-07	2.45234e-05	34.5029	11.6279
fxyd1	Crista cabp1b+ HC	1.14848	0.604235	19006.5	0.646216	2.07686e-07	3.38482e-05	55.5556	30.2326
sesn1	Crista cabp1b+ HC	0.910038	0.554245	18771	0.638209	2.16273e-07	3.48667e-05	46.7836	23.8372
rab2a	Crista cabp1b+ HC	1.12298	0.565545	18884.5	0.642068	5.9064e-07	8.51007e-05	54.9708	34.3023
ebf3a	Crista cabp1b+ HC	1.42328	0.636077	18949	0.644261	9.25897e-07	0.000128441	62.5731	40.6977
si:ch211-216b21.2	Crista cabp1b+ HC	0.996795	0.572154	18511	0.629369	9.41122e-07	0.000129949	46.1988	22.093
atp8a2	Crista cabp1b+ HC	1.45723	0.644014	18963.5	0.644754	9.51175e-07	0.000130732	64.9123	40.6977
svila	Crista cabp1b+ HC	1.47299	0.625968	18848	0.640827	2.20113e-06	0.000264712	65.4971	44.186
tagapa	Crista cabp1b+ HC	0.975762	0.524229	18495	0.628825	2.47222e-06	0.000292595	49.1228	27.907
dachb	Crista cabp1b+ HC	1.28608	0.599297	18650.5	0.634112	2.99957e-06	0.000349462	57.8947	34.8837
capgb	Crista cabp1b+ HC	1.66488	0.633607	18825.5	0.640062	3.0197e-06	0.000350438	67.2515	47.6744
si:dkey-16p21.8	Crista cabp1b+ HC	0.955441	0.514609	18371.5	0.624626	3.66237e-06	0.000418947	46.7836	26.1628
pde1a	Crista cabp1b+ HC	1.48525	0.751749	18377	0.624813	4.79378e-06	0.000529535	49.7076	26.7442
rpl10a	Crista cabp1b+ HC	1.24442	0.539515	18430	0.626615	9.42943e-06	0.000963126	57.3099	33.7209
rtn4rl2b	Crista cabp1b+ HC	1.10551	0.520311	18389	0.625221	9.69807e-06	0.000983826	53.2164	34.3023
tob1a	Crista cabp1b+ HC	1.08373	0.510578	18359	0.624201	9.94995e-06	0.00100256	52.0468	33.1395
agrn	Crista cabp1b+ HC	2.40371	0.635232	18725	0.636645	1.11921e-05	0.00110722	90.0585	70.9302
xirp2b	Crista cabp1b+ HC	1.26527	0.590883	18359.5	0.624218	1.34422e-05	0.00129746	54.386	36.0465
h2ax1	Crista cabp1b+ HC	1.48148	0.578165	18335	0.623385	2.53661e-05	0.0022651	62.5731	38.9535
galnt9	Crista cabp1b+ HC	1.41492	0.55619	18255	0.620665	2.56773e-05	0.00228604	59.6491	32.5581
fosb	Crista cabp1b+ HC	1.37069	0.62029	18185.5	0.618302	2.83379e-05	0.00248582	53.2164	33.7209
ddx5	Crista cabp1b+ HC	1.76521	0.504074	18477.5	0.62823	3.01332e-05	0.00261257	76.6082	60.4651
dachc	Crista cabp1b+ HC	1.05015	0.504671	18087.5	0.61497	3.41795e-05	0.00290429	49.1228	31.9767
fosab	Crista cabp1b+ HC	2.67588	0.616964	18371	0.624609	5.93355e-05	0.00466935	81.8713	72.093
actb2	Crista cabp1b+ HC	1.42201	0.516977	18064	0.614171	0.000108813	0.00778264	61.9883	43.0233
si:dkey-222f2.1	Crista cabp1b+ HC	2.28251	0.511009	18184.5	0.618268	0.000134575	0.0093778	79.5322	70.3488

## Sheet: Crista cabp2b+ HC
feature	group	avgExpr	logFC	statistic	auc	pval	padj	pct_in	pct_out
adam11	Crista cabp2b+ HC	2.49137	2.17918	26824	0.912009	4.65392e-44	1.38803e-39	91.2791	15.2047
scn5lab	Crista cabp2b+ HC	1.47052	1.35046	23455.5	0.797481	1.18278e-28	8.81914e-25	64.5349	7.01754
gpc3	Crista cabp2b+ HC	2.01849	1.74227	23836	0.810418	1.50934e-28	9.00321e-25	70.9302	12.8655
ncam2	Crista cabp2b+ HC	2.641	2.13888	24041	0.817387	2.49297e-28	1.23922e-24	74.4186	18.7135
loxhd1a	Crista cabp2b+ HC	1.77408	1.34434	23665.5	0.804621	3.7012e-25	1.22654e-21	77.907	25.1462
tmc2a	Crista cabp2b+ HC	2.95685	1.46764	23847.5	0.810809	1.10648e-23	3.30009e-20	91.2791	59.0643
camta1b	Crista cabp2b+ HC	1.57586	1.50574	22012	0.748402	1.30894e-23	3.549e-20	52.3256	4.09357
adgrl2a	Crista cabp2b+ HC	2.38004	1.43078	23514	0.79947	1.77278e-22	3.77665e-19	88.9535	46.7836
kcnn2	Crista cabp2b+ HC	1.72304	1.41642	22523	0.765776	5.56034e-22	1.10558e-18	62.7907	16.3743
glis1b	Crista cabp2b+ HC	1.84492	1.37863	22777	0.774412	1.04691e-21	1.9515e-18	70.3488	21.6374
cabp2b	Crista cabp2b+ HC	1.38611	1.17411	22129.5	0.752397	2.82636e-21	4.68313e-18	58.7209	11.6959
pls1	Crista cabp2b+ HC	1.10511	0.961162	21762.5	0.739919	1.38272e-20	2.17051e-17	55.2326	8.18713
slc8a2a	Crista cabp2b+ HC	1.51913	1.07962	22559	0.767	4.67144e-20	6.96628e-17	72.093	26.3158
myo3a	Crista cabp2b+ HC	1.14931	0.973401	21513	0.731436	5.8665e-19	7.60732e-16	54.6512	10.5263
grin1a	Crista cabp2b+ HC	1.1957	0.975629	21532	0.732082	2.10947e-18	2.5166e-15	56.3953	12.8655
atp6v1c2	Crista cabp2b+ HC	0.704162	0.680051	20252.5	0.688579	6.33588e-18	6.74885e-15	38.9535	1.16959
sox6	Crista cabp2b+ HC	1.58726	1.14697	21819	0.74184	1.86251e-17	1.91549e-14	66.2791	22.807
cables1	Crista cabp2b+ HC	0.930421	0.854258	20074.5	0.682528	1.21395e-15	1.03446e-12	40.1163	4.67836
zgc:77158	Crista cabp2b+ HC	0.76768	0.689431	20076	0.682579	1.19208e-15	1.03446e-12	40.6977	4.09357
fndc3ba	Crista cabp2b+ HC	1.3656	0.966538	21200.5	0.720811	1.34326e-15	1.11285e-12	61.6279	18.1287
kcnh7	Crista cabp2b+ HC	0.819098	0.766888	19963	0.678737	1.76707e-15	1.38691e-12	38.9535	4.09357
msi2b	Crista cabp2b+ HC	2.24754	1.24879	21764	0.73997	2.58516e-15	1.88054e-12	79.0698	44.4444
ptprz1b	Crista cabp2b+ HC	0.713741	0.649312	19783.5	0.672634	5.76151e-15	4.09136e-12	37.7907	3.50877
lmo1	Crista cabp2b+ HC	0.580395	0.529447	19647	0.667993	1.08566e-14	7.35901e-12	36.6279	2.92398
sdr42e2	Crista cabp2b+ HC	0.849497	0.73779	20029	0.680981	1.57509e-14	1.04394e-11	41.8605	7.01754
tgfbr1a	Crista cabp2b+ HC	0.802283	0.735244	19724.5	0.670628	2.24768e-14	1.45733e-11	37.7907	4.67836
tbx1	Crista cabp2b+ HC	1.21067	0.861774	20886	0.710118	2.55623e-14	1.58172e-11	58.1395	21.0526
thbs3b	Crista cabp2b+ HC	0.583582	0.542056	19521	0.663709	2.51187e-14	1.58172e-11	35.4651	2.92398
nrp2b	Crista cabp2b+ HC	1.18311	0.840824	20759.5	0.705817	2.73101e-14	1.62905e-11	57.5581	16.3743
lrfn5a	Crista cabp2b+ HC	2.19265	1.20567	21360	0.726234	5.57825e-14	3.26218e-11	76.1628	40.9357
eps8l2	Crista cabp2b+ HC	1.40307	0.904753	20992	0.713722	8.98463e-14	5.05597e-11	64.5349	27.4854
dennd2b	Crista cabp2b+ HC	0.754987	0.641004	19767	0.672073	1.3395e-13	7.39825e-11	40.6977	6.43275
zgc:113162	Crista cabp2b+ HC	1.58946	0.936027	21058.5	0.715983	1.90762e-13	1.03445e-10	67.4419	35.0877
nfixb	Crista cabp2b+ HC	2.63345	1.07921	21276.5	0.723395	3.26534e-13	1.73908e-10	79.6512	54.9708
robo1	Crista cabp2b+ HC	1.41614	1.04126	20350	0.691894	5.30557e-13	2.63731e-10	52.907	16.9591
ano2b	Crista cabp2b+ HC	2.39146	1.36022	20995	0.713824	5.59837e-13	2.73724e-10	66.8605	40.9357
hivep3b	Crista cabp2b+ HC	0.709185	0.642418	19234	0.653951	7.66841e-13	3.68888e-10	34.3023	4.09357
ttc6	Crista cabp2b+ HC	1.26679	0.821584	20643	0.701856	8.31037e-13	3.90693e-10	61.6279	24.5614
pdgfc	Crista cabp2b+ HC	0.782837	0.647825	19527	0.663913	1.09923e-12	5.04376e-10	39.5349	6.43275
slc4a10a	Crista cabp2b+ HC	1.97298	0.936673	21067.5	0.716289	1.43402e-12	6.44602e-10	79.0698	50.8772
akt3a	Crista cabp2b+ HC	2.38585	1.06107	21106.5	0.717615	1.59161e-12	6.98084e-10	81.9767	57.8947
zgc:77784	Crista cabp2b+ HC	1.23963	0.852195	20241	0.688188	2.72438e-12	1.17761e-09	54.6512	18.1287
tnk2b	Crista cabp2b+ HC	0.593682	0.524653	19083	0.648817	7.56832e-12	3.22464e-09	34.3023	5.26316
adgrb2	Crista cabp2b+ HC	0.579407	0.548661	18524.5	0.629828	8.29957e-12	3.4864e-09	27.3256	1.16959
b4galnt4a	Crista cabp2b+ HC	1.49668	1.00979	20361	0.692268	1.01543e-11	4.20629e-09	59.3023	27.4854
bdnf	Crista cabp2b+ HC	1.87377	0.754957	20827	0.708112	1.18976e-11	4.79521e-09	76.7442	58.4795
rerea	Crista cabp2b+ HC	1.13734	0.78377	20042.5	0.68144	1.76056e-11	6.8193e-09	52.907	20.4678
khdrbs2	Crista cabp2b+ HC	0.639013	0.574176	18858.5	0.641184	2.14129e-11	8.18768e-09	31.9767	4.67836
kdm7ab	Crista cabp2b+ HC	1.10415	0.739912	20057	0.681933	2.36228e-11	8.91837e-09	54.6512	21.0526
samd10b	Crista cabp2b+ HC	1.22593	0.905895	19689.5	0.669438	2.92913e-11	1.09202e-08	45.9302	15.2047
cers5	Crista cabp2b+ HC	1.13391	0.768236	20047.5	0.68161	4.14679e-11	1.52689e-08	54.6512	23.9766
eya1	Crista cabp2b+ HC	2.84587	0.691026	20708.5	0.704083	6.12713e-11	2.22856e-08	93.0233	85.3801
si:ch211-172l8.4	Crista cabp2b+ HC	0.786714	0.592827	19180	0.652115	2.58698e-10	8.86859e-08	40.6977	11.1111
cux1a	Crista cabp2b+ HC	1.13836	0.701037	19861.5	0.675286	2.65251e-10	8.9899e-08	57.5581	23.3918
limch1a	Crista cabp2b+ HC	1.66225	0.809971	20257.5	0.688749	3.45093e-10	1.1436e-07	72.6744	43.8596
nrg3b	Crista cabp2b+ HC	1.3727	0.821816	19809	0.673501	4.33845e-10	1.38712e-07	57.5581	23.9766
PCP4	Crista cabp2b+ HC	1.08496	0.740403	19438.5	0.660904	4.43151e-10	1.39126e-07	47.093	16.3743
arhgef12b	Crista cabp2b+ HC	0.986453	0.671711	19440	0.660955	4.92276e-10	1.52939e-07	47.6744	16.3743
col2a1b	Crista cabp2b+ HC	0.616275	0.510897	18687.5	0.63537	5.93693e-10	1.80683e-07	33.1395	7.01754
dpp6b	Crista cabp2b+ HC	1.41956	0.86423	19634.5	0.667568	7.55249e-10	2.25253e-07	54.6512	21.0526
atp2a2b	Crista cabp2b+ HC	1.35971	0.725475	19970.5	0.678992	9.08138e-10	2.65541e-07	65.6977	34.5029
atp1a3b	Crista cabp2b+ HC	3.16194	0.621522	20300	0.690194	1.08916e-09	3.12349e-07	90.6977	87.1345
IQSEC1	Crista cabp2b+ HC	1.1712	0.701071	19661	0.668469	1.08566e-09	3.12349e-07	55.2326	24.5614
syne1a	Crista cabp2b+ HC	0.911202	0.587918	19445	0.661125	1.1201e-09	3.18163e-07	50	18.7135
si:ch211-285f17.1	Crista cabp2b+ HC	1.68373	0.821504	20057	0.681933	1.19014e-09	3.34868e-07	71.5116	41.5205
raver2	Crista cabp2b+ HC	1.27012	0.663601	19896.5	0.676476	1.48282e-09	4.13319e-07	65.6977	33.9181
cntnap2b	Crista cabp2b+ HC	0.686037	0.515044	18900	0.642595	1.68365e-09	4.60688e-07	38.3721	11.1111
dnah9l	Crista cabp2b+ HC	1.78106	0.76794	20022.5	0.68076	2.94196e-09	7.76496e-07	75.5814	51.462
unc5a	Crista cabp2b+ HC	1.08442	0.825078	18770	0.638175	3.85557e-09	9.99933e-07	37.2093	11.1111
KCNAB3	Crista cabp2b+ HC	0.657583	0.530494	18410	0.625935	4.55737e-09	1.1519e-06	31.3953	7.01754
sipa1l2	Crista cabp2b+ HC	1.52835	0.712352	19826.5	0.674096	5.71659e-09	1.43275e-06	69.7674	42.6901
rbms3	Crista cabp2b+ HC	1.44803	0.785232	19554.5	0.664848	7.21455e-09	1.73527e-06	56.9767	32.7485
maml3	Crista cabp2b+ HC	1.06466	0.65603	19246.5	0.654376	8.27784e-09	1.95942e-06	49.4186	22.2222
drp2	Crista cabp2b+ HC	0.910838	0.650832	18763	0.637937	8.62316e-09	2.00926e-06	38.9535	12.2807
pard3bb	Crista cabp2b+ HC	0.696208	0.542898	18246	0.620359	9.18017e-09	2.12247e-06	30.2326	5.84795
CR847968.1	Crista cabp2b+ HC	0.69047	0.55425	18243	0.620257	1.1743e-08	2.69413e-06	30.2326	6.43275
syne1b	Crista cabp2b+ HC	1.88976	0.72942	19841	0.674589	1.37776e-08	3.11301e-06	80.2326	57.8947
IGLON5	Crista cabp2b+ HC	0.701639	0.624222	17822	0.605943	1.85325e-08	4.03972e-06	24.4186	3.50877
dnah5	Crista cabp2b+ HC	2.62661	0.769313	19847.5	0.67481	1.97855e-08	4.27611e-06	91.2791	73.6842
cgnb	Crista cabp2b+ HC	0.930045	0.543968	19170	0.651775	2.1545e-08	4.58984e-06	51.1628	23.3918
rarga	Crista cabp2b+ HC	1.30176	0.627001	19484	0.662451	2.93725e-08	6.04163e-06	65.6977	35.6725
cib2	Crista cabp2b+ HC	0.867847	0.52319	18947.5	0.64421	5.40102e-08	1.03926e-05	48.2558	21.0526
fhdc1	Crista cabp2b+ HC	0.88793	0.540807	18841.5	0.640606	7.11679e-08	1.34341e-05	45.9302	19.883
caska	Crista cabp2b+ HC	1.03135	0.601917	18920	0.643275	8.2558e-08	1.51993e-05	49.4186	21.6374
mipol1	Crista cabp2b+ HC	1.44616	0.659273	19396.5	0.659476	8.51946e-08	1.55885e-05	69.186	40.9357
galnt1	Crista cabp2b+ HC	1.30782	0.693824	19173	0.651877	9.34007e-08	1.67014e-05	56.9767	32.1637
zbtb46	Crista cabp2b+ HC	0.934563	0.599314	18707	0.636033	9.35167e-08	1.67014e-05	43.0233	18.1287
cadm4	Crista cabp2b+ HC	0.965811	0.57102	18657	0.634333	1.34827e-07	2.28478e-05	44.186	16.9591
ccdc102a	Crista cabp2b+ HC	1.22604	0.635383	19097.5	0.64931	1.46092e-07	2.45234e-05	56.3953	32.1637
hivep2a	Crista cabp2b+ HC	2.16169	0.700362	19465.5	0.661822	1.74969e-07	2.88312e-05	84.8837	64.9123
sptbn1	Crista cabp2b+ HC	1.40538	0.626014	19222	0.653543	2.38327e-07	3.7609e-05	67.4419	41.5205
rxraa	Crista cabp2b+ HC	1.23213	0.664752	18860	0.641235	2.5611e-07	3.9992e-05	52.3256	25.1462
pcdh15a	Crista cabp2b+ HC	0.664956	0.512971	17795	0.605025	2.58701e-07	4.01862e-05	27.3256	6.43275
aak1a	Crista cabp2b+ HC	1.11102	0.565966	18831.5	0.640266	4.51935e-07	6.73948e-05	54.0698	27.4854
ankrd24	Crista cabp2b+ HC	1.87797	0.636255	19270.5	0.655192	4.57573e-07	6.78961e-05	78.4884	60.2339
clasp1a	Crista cabp2b+ HC	0.922039	0.514769	18692.5	0.63554	4.77428e-07	7.04915e-05	49.4186	23.3918
hdac4	Crista cabp2b+ HC	1.19501	0.607664	18829.5	0.640198	5.31275e-07	7.79139e-05	54.0698	29.2398
znf804a	Crista cabp2b+ HC	1.05263	0.623158	18445	0.627125	7.11342e-07	0.000100074	43.0233	19.2982
setbp1	Crista cabp2b+ HC	1.46145	0.622226	19016	0.646539	7.57265e-07	0.000106035	68.0233	39.1813
MAGI3	Crista cabp2b+ HC	1.05903	0.62623	18412	0.626003	1.11384e-06	0.000151002	43.0233	21.0526
pcdh15b	Crista cabp2b+ HC	1.83417	0.676794	19003.5	0.646114	1.13239e-06	0.000152821	66.8605	48.538
espn	Crista cabp2b+ HC	2.10577	0.652378	19083	0.648817	1.47596e-06	0.000193073	83.1395	62.5731
ppm1e	Crista cabp2b+ HC	1.78878	0.692643	18995	0.645825	1.51333e-06	0.00019539	70.9302	52.0468
cdc14ab	Crista cabp2b+ HC	2.23978	0.593134	19063	0.648137	1.88256e-06	0.000233947	87.2093	71.345
dnah3	Crista cabp2b+ HC	1.0471	0.522431	18591	0.632089	2.01923e-06	0.000246818	53.4884	28.0702
shisal1a	Crista cabp2b+ HC	0.792287	0.520422	18049	0.613661	2.10887e-06	0.000256723	36.0465	15.2047
s100s	Crista cabp2b+ HC	0.881197	0.554673	18163.5	0.617554	2.14591e-06	0.000259183	38.9535	17.5439
ncanb	Crista cabp2b+ HC	1.78977	0.636281	18781.5	0.638566	4.87649e-06	0.000535993	70.9302	52.0468
arfgef1	Crista cabp2b+ HC	1.96293	0.563208	18832	0.640283	5.74854e-06	0.000621196	81.3953	65.4971
skia	Crista cabp2b+ HC	1.17506	0.551537	18514.5	0.629488	6.08494e-06	0.000650607	56.9767	34.5029
eya4	Crista cabp2b+ HC	1.81253	0.560829	18803	0.639297	6.15057e-06	0.000655146	78.4884	61.9883
myo6b	Crista cabp2b+ HC	2.29573	0.697352	18828	0.640147	6.32698e-06	0.000669157	89.5349	64.9123
si:ch211-235m3.10	Crista cabp2b+ HC	1.85581	0.671304	18691	0.635489	6.61715e-06	0.000697373	68.6047	47.9532
atp1b2b	Crista cabp2b+ HC	2.62775	0.531185	18764	0.637971	9.31094e-06	0.00095728	84.8837	78.3626
ext1a	Crista cabp2b+ HC	0.980195	0.531126	18098	0.615327	9.3401e-06	0.00095728	43.6047	21.6374
cdh23	Crista cabp2b+ HC	1.32399	0.564662	18398.5	0.625544	1.12114e-05	0.00110722	55.814	35.0877
si:ch211-195b13.1	Crista cabp2b+ HC	1.14405	0.554908	18288	0.621787	1.37362e-05	0.00131731	51.7442	32.1637
arhgap12b	Crista cabp2b+ HC	1.25269	0.515838	18428	0.626547	1.63844e-05	0.00153668	60.4651	42.1053
adgrl1a	Crista cabp2b+ HC	1.38664	0.668556	18216.5	0.619356	1.69442e-05	0.00157434	49.4186	31.5789
kcnma1a	Crista cabp2b+ HC	3.07552	0.562252	18495	0.628825	3.64482e-05	0.00307081	93.6047	83.6257
jmjd1cb	Crista cabp2b+ HC	1.90813	0.512647	18341	0.623589	6.48567e-05	0.00503737	82.5581	64.9123
