# Supplementary material for: Single-cell transcriptomic profiling of the zebrafish inner ear reveals molecularly distinct hair cell and supporting cell subtypes
Source: eLife. 2023 Jan 4;12:e82978. doi: 10.7554/eLife.82978 (PMC9851615; doi:10.7554/eLife.82978)
Supplement: Supplementary file 12. [file elife-82978-supp12.xlsx]

## Sheet: Sheet1
Gene	Accession #	RNA target Sequence
cabp1b	NM_001002414.1	ACACAAGAAGAGGAGAAAGAGAAGGAGAAAGAAGAAGAAGAAGAGGGCGAGAAAGACACACTGAGACTCA TGTCTGCTTCTGCTGATCCCTGCACCCGTCCCTGCTGTCAGCCAGACGTCCTGCAACGCCACCCCTGGAT CATCTACACCCTTCCCCTGAAATCCTAATAGATAAAGCCTGCACACATCATCTCAGCGTTCGTTTAATCC ATGCATGGAGACATGTGGATGCTCACACACGCGCGCATATGGCCGCATTGACTCTCATGTGCACGCTATT AGTGACTTTACTATGGGAAACTGTGTTAAATCGCCGCTTAAGAATCTCTCCAAGAAGAACAGAGAGCTGA GACCAGAGGAAATGGATGAGCTCCGAGAAGCCTTTAAAGAGTTC…
cabp2b	ENSDART00000074099.6	GCAATTAAGAAGAAGGTGGAGAAACAGAGGAGGCAAAGTGAAACGGGCCTGTCAGAGGCA TTTAACAGCAATACAAGACCCAAAATGGCCCAGAAAAAAAAACAGCCTGTTCAGCCTCCC CGCAAAGCTGGAGACGGAGAGGACGAGGAGGAGGAAGTGGAGCCTGTGGAGGCTGAAGAG ACTGAGGAACCCAAGGAGAAGGAGGATTCTGACCTCGGACCCATCGTGGAGTCTGTTTTT GGTCCGGACAGGGAGCTGCGGCCGGAAGAGATTGAAGAGCTGAGAGAAGCTTTTAAAGAG TTCGACAGAAATAAAGGATACATCAACTGCAGAGACCTGGGCGAATGCATGCGGACCATG GGTTACATGCCCACCGAGATGGAGCTGATCGAG…
cabp5b	NM_001020732.1	ATGATACAGCTGAAGTAAAAGCAAGACACTGCTGCGTTGAGGATCATTAGAGCGTTTAAT CATTCAGTATCTGCTGACTGACAGAAAGAAACGTTTCTTCTTGCTCCAAATTCAAGAATA GCTGGAAAGGAGAGAAGCTGACAGAAGCAAGTGGAGAACTCAGAGAAACTGCACTTCCTT TACTGCTTCCTGCCGACAAACAGAGAGAGAGAGAGAGCAGCATTGAAAAATCATTTTTGA AGAGGCTCAGAAGAAACTCAAAAGAAGCTGTCATGAGTCTAGGGCCGGCTTGCATTTTCC TAAGAGGATCTAAAAATGCACACCGTCCTCTTGCTGACGAGGAGATAGATGAGCTGCGCG AGGCGTTCACTGAGTTTGATAAGGATAAGGATG…
dla	ENSDART00000012104.8	ATACAAACGCACAGTGTCGGCGGGAGAAGGACGTGAGGAGGGATGTTGGACCAGTGACGA ACCCTGGTTTAATATCAGACGAAGAAGGAACTATACACGACGAGCATCTGTCCTACTTTT CTTCTCCGACATTTGAGGATTATATATCACGGAATTCAACAAGTCCGTTTTACTTCAGGA CTTTCTGGACTCTTTTTTTTTTCTCCCGGGGAAGAACTGTTGCATTGTGCGCACTTGACA TGAATGGGAACTGCGTTCACGCTCAGTCTGTACTGAATGCAAGTCTCCACCAATGAATCA GTCGGCGAAAAGAGAAGGCTTTTAATACAAGGGATCCCCTGACTGATCTGAGATCAGCCA AGTTGCTCAGAGACTTTCACAAAATCCTATTTA…
lfng	NM_130971.1	GACTCTCAGCGCTACTATGCAGCAGTCGGATGACACGCTTGTTTTTTAGAATAGGCTTTT GGAGGGAGGTTTAGATAAATGCTGTGTATATAAAAAAACATAGTTTATTGAACATGTTGA AAACATATCGCGGAAAAGTCGTGGTCTCTCTTGCGGGAGCCACCGTCACCTGTCTGGGGT TTCTGTTGTTTCTCTCGCAGCATCAGCGGATTCAGGCGGACGGGATGCAGAACGAGAGCG AGGTCGGGTTGCGCTCGCTCCAGAGTCTGGGAGATTCAGAGACTGATGATGGAGCTCAGC CTGAGCAGAATGCAAAGAAAGGATTCTCTGCTTATTTTTCCAAGCTGACCCGCAGCAGGA GGGAAGCGGATAAGCCCAGCGAGGCACCCGGAG…
loxhd1b	XM_001920605.5	CATTTTACATTTACATTTTACAAGAACAAGAAAAGAAGAAAGAGAAGAGAAAAAAGAAGAAGAATTACAA CATTTAACACTGTTAGAAAGAAGAAGAAAGAGAAGAGAAAAGAAGAAAAAGGAGAAGAAAGAGAAGAATT ACAACATTTAACACGATTTAAGAAAACATTTAAGAAAGAAATTTATTACAACATTTAAGAAAAAGAAAGA GAAGAGGAAGAAAAAGAAAAGAGAAGAATAACAACGCATTTAAAGTTCACATTTTACAAGAAGAACGAGA AGAAAAAAACAAGGAGAAGAAGAAAGAGAAAAAAGCAGAAGAATAACATTTAACATTTATATTTTACAAG AAGAAAAAACAGAAGAAGGTTAAAATTTACATTTCACAAGAAGA…
pvalb9	NM_182938.2	GCTTATCACACAGCCTTACCTCTGCTCCAGATCAGCGCGAGGAGACTCTTCACAGTTTGAATATGTCACT TACTTCCATCCTCTCAGCTGAAGCCATTGAAAATGCTGTCAAAGACTGCCAAGCTCCGGACTCCTTTTGT TACAAAAAGTTCTTCCAGCTTTGTGGCCTGAGCCAGAAAACTCCTCAGGAGGTGAAGGATGTCTTCCGTA TCATAGATGAGGATAACAGTGGATTTATCGAGGAGGCTGAGCTCAAGTTCTTTCTCCAGCGGTTTTTCCC GGGGGCACGAACCCTGACAGAAAAGGAGATTAAGAGCCTCCTCACAGCTGCAGATGATGATAGTGATGGC CGAATTGGAGTAGATGAGTTCCAGACTATGGTTTCATCCTGAAA…
skor2	NM_001045421.1	ATTCGCTCTGTCTCTACTCTTACTACAGTTACTGGACACGATAAAGGAGATTGTTTCTGTTTGTAAAGTT CGTGGTCTCGCTGGCCGTTTTCATTAATTTCTGATAGCGAGATTTCGTATGTGGAATATAGGCTATTCGA CATGATTTGTGCTCTGTAGCGTTTGGAAAACTCCGACAGCGCGCGGAGACAAAATACTCCAGTCAGTGGT CTCCTTGGCATGGACAAGAGTCTTCTGCCTGGACCAAAAGACACTGTGATGGCAACCCCACCAAGTTCAT TTCAGCAGGAGCCCCTCACACCTCCAAGATCCTCACTTAAGCCCAACCAAGTTGGGCAGGTCATCCTCTA CGGGGTACCAATTGTTTCACTTGTAATTGACAATCAAGAACGGC…
tectb	NM_001008594.1	ATCTCTGCTCATAGGATTTATCATCATTTAGCTGCTGAAGACCTACACAGGAACCATGCA AAACTTCTGCTAGAGACCTGAGCCAACATTTCTTCTGGATTCTGCCACTGGGATGTTTAA CAAAATGGCAGCTGTTGGCCTTTTCTTCATCCTCCTCCCCGTGACGTGGGCCTGTGCCCC TCAGAAAGCTGATTACGTGATGGTGTCATGTTTTCCCAATGCCATCATCGCAAACGTGCC AGAATGTCCATATGGATGGGAGATCGGCCAGCTGTCATTGGGTGGCGTGTGCTATACGGG CATTAATACCCCGGGCTTTTACCGTTTTACCATCCCAGACCTCACTCCTAAAAATCATTC ATACTGCGGCACTTTGTCTGAGTATGTAGGAGG…
zpld1a	NM_001302227.1	CAGGGATGCTGGGTAATCCAGTCAGTCTCGCGCCACAGCTGAGAACAGATGGAGTACCGC TGATTCTACAGCTGCCAGGAAAGCGGGTGATTGAAATGGAACGTTTGTGTGTGATTCTCT TGCTTGTAAGTAAAACTTTCATAGCGAATGCTCAATTCAATGGGTTCAACTGTGATGCCA ACTTCCACAGCCGCTTCCCCGCCGAGCGGGACATCAGTGTGTATTGTGGAGTTCAAACCA TAACTCTGAAGATTAATTTTTGCCCGGTGCTTTTTTCTGGCTACACTGACACTGACCTGG CACTGAATGGGCGTCACGGGGATGCCCACTGCAGAGGCTTCATCAACAACAACACGTTCC CCACGGTTGTGCTGTTTAGCATCAGTCTCAACA…
